# Supplementary material for: CD8+ T cell self-tolerance permits responsiveness but limits tissue damage
Source: eLife journal article supplement (doi:10.7554/elife.65615), 2021-04-30
Supplement: fig1-data1 [file elife-65615-fig1-data1-v2.pzfx]

<?xml version="1.0" encoding="UTF-8"?><GraphPadPrismFile PrismXMLVersion="5.00">
<Created>
<OriginalVersion CreatedByProgram="GraphPad Prism" CreatedByVersion="9.1.0.216" Login="emilytruckenbrod" DateTime="2021-04-29T09:03:31-05:00"></OriginalVersion>
<MostRecentVersion CreatedByProgram="GraphPad Prism" CreatedByVersion="9.1.0.216" Login="emilytruckenbrod" DateTime="2021-04-29T10:46:59-05:00"></MostRecentVersion>
</Created>
<InfoSequence>
<Ref ID="Info1"></Ref>
<Ref ID="Info2"></Ref>
<Ref ID="Info3"></Ref>
<Ref ID="Info4"></Ref>
<Ref ID="Info5"></Ref>
<Ref ID="Info6"></Ref>
<Ref ID="Info7"></Ref>
<Ref ID="Info8"></Ref>
<Ref ID="Info9"></Ref>
<Ref ID="Info10"></Ref>
<Ref ID="Info11" Selected="1"></Ref>
</InfoSequence>
<TableSequence>
<Ref ID="Table1"></Ref>
<Ref ID="Table4"></Ref>
<Ref ID="Table7"></Ref>
<Ref ID="Table8"></Ref>
<Ref ID="Table13"></Ref>
<Ref ID="Table14"></Ref>
<Ref ID="Table19"></Ref>
<Ref ID="Table22"></Ref>
<Ref ID="Table25"></Ref>
<Ref ID="Table28"></Ref>
<Ref ID="Table31" Selected="1"></Ref>
</TableSequence>
<Table ID="Table1" XFormat="none" TableType="OneWay" EVFormat="AsteriskAfterNumber">
<Title>No. Trp2/Kb-specific CD8+ T cells per mouse</Title>
<Info ID="Info1">
<Title>No. Trp2/Kb-specific CD8+ T cells per mouse</Title>
<Notes>
<Font Color="#000000" Face="Helvetica">Pre-immune tetramer pulldown</Font>
<Font Color="#000000" Face="Helvetica"><BR></BR>Males = square symbols</Font>
<Font Color="#000000" Face="Helvetica"><BR></BR>Compiled from three experiments: </Font>
<Font Color="#000000" Face="Symbol"><BR></BR>·	</Font>
<Font Color="#000000" Face="Times New Roman">3/17/16: 4 WT, 4 KO (all female, all approximately 6 weeks old), pulldown for Trp2</Font>
<Font Color="#000000" Face="Courier New"><BR></BR>o	</Font>
<Font Color="#000000" Face="Times New Roman">Eliminated WT1: odd tetramer staining and difficult to gate accurately. (other samples looked fine)</Font>
<Font Color="#000000" Face="Symbol"><BR></BR>·	</Font>
<Font Color="#000000" Face="Times New Roman">5/9/16: 4 female WT, 4 male (SSS) KOs (all approx. 8 weeks old), pulldown for Trp2 (PE, PE-Cy7) and B8R (APC, PE-Cy7)</Font>
<Font Color="#000000" Face="Symbol"><BR></BR>·	</Font>
<Font Color="#000000" Face="Times New Roman">9/18/17: 4 WT (male, 6/12/17), 4 KO (EEE), DOB 6/8 or 6/12: all male</Font>
<Font Color="#000000" Face="Courier New"><BR></BR>o	</Font>
<Font Color="#000000" Face="Times New Roman">Used more generous (alt Trp2+) gate for this experiment </Font>
</Notes>
<Constant><Name>Experiment Date</Name><Value>2020-05-21</Value></Constant>
<Constant><Name>Experiment ID</Name><Value></Value></Constant>
<Constant><Name>Notebook ID</Name><Value></Value></Constant>
<Constant><Name>Project</Name><Value></Value></Constant>
<Constant><Name>Experimenter</Name><Value></Value></Constant>
<Constant><Name>Protocol</Name><Value></Value></Constant>
</Info>

<RowTitlesColumn Width="32">
<Subcolumn></Subcolumn>
</RowTitlesColumn>
<YColumn Width="81" Decimals="0" Subcolumns="1">
<Title>WT</Title>
<Subcolumn>
<d>1440</d>
<d>1187</d>
<d>1206</d>
<d>1032</d>
<d>2336</d>
<d>1778</d>
<d>1346</d>
<d>1352</d>
<d></d>
<d>1265</d>
<d>1274</d>
<d>670</d>
</Subcolumn>
</YColumn>
<YColumn Width="81" Decimals="0" Subcolumns="1">
<Title><I>Dct</I><SUP>-/-</SUP></Title>
<Subcolumn>
<d>1158</d>
<d>1786</d>
<d>1867</d>
<d>2708</d>
<d>2044</d>
<d>1470</d>
<d>1577</d>
<d>2383</d>
<d>1613</d>
<d>2638</d>
<d>1709</d>
<d>2098</d>
</Subcolumn>
</YColumn>
</Table>
<Table ID="Table4" XFormat="none" TableType="OneWay" EVFormat="AsteriskAfterNumber">
<Title>PE MFI of Trp2 tetramer positive</Title>
<Info ID="Info2">
<Title>PE MFI of Trp2 tetramer positive</Title>
<Notes></Notes>
<Constant><Name>Experiment Date</Name><Value>2017-03-18</Value></Constant>
<Constant><Name>Experiment ID</Name><Value></Value></Constant>
<Constant><Name>Notebook ID</Name><Value></Value></Constant>
<Constant><Name>Project</Name><Value></Value></Constant>
<Constant><Name>Experimenter</Name><Value></Value></Constant>
<Constant><Name>Protocol</Name><Value></Value></Constant>
</Info>

<RowTitlesColumn Width="32">
<Subcolumn></Subcolumn>
</RowTitlesColumn>
<YColumn Width="70" Decimals="1" Subcolumns="1">
<Title>WT</Title>
<Subcolumn>
<d>728</d>
<d>745</d>
<d>803</d>
<d>755</d>
</Subcolumn>
</YColumn>
<YColumn Width="70" Decimals="1" Subcolumns="1">
<Title><I>Dct</I><SUP><I>-/-</I></SUP></Title>
<Subcolumn>
<d>850</d>
<d>883</d>
<d>985</d>
<d>940</d>
</Subcolumn>
</YColumn>
</Table>
<Table ID="Table7" XFormat="none" TableType="OneWay" EVFormat="AsteriskAfterNumber">
<Title>APC MFI of B8R tetramer positive</Title>
<Info ID="Info3">
<Title>APC MFI of B8R tetramer positive</Title>
<Notes>
<Font Color="#000000" Face="Helvetica">WT = females, KO = males</Font>
<Font Color="#000000" Face="Helvetica"><BR></BR>Dual pulldown for Trp2 and B8R</Font>
</Notes>
<Constant><Name>Experiment Date</Name><Value>2016-05-09</Value></Constant>
<Constant><Name>Experiment ID</Name><Value></Value></Constant>
<Constant><Name>Notebook ID</Name><Value></Value></Constant>
<Constant><Name>Project</Name><Value></Value></Constant>
<Constant><Name>Experimenter</Name><Value></Value></Constant>
<Constant><Name>Protocol</Name><Value></Value></Constant>
</Info>

<RowTitlesColumn Width="84">
<Subcolumn></Subcolumn>
</RowTitlesColumn>
<YColumn Width="70" Decimals="0" Subcolumns="1">
<Title>WT</Title>
<Subcolumn>
<d>1582</d>
<d>1601</d>
<d>1612</d>
<d>1751</d>
</Subcolumn>
</YColumn>
<YColumn Width="70" Decimals="0" Subcolumns="1">
<Title><I>Dct</I><SUP><I>-/-</I></SUP></Title>
<Subcolumn>
<d>1717</d>
<d>1660</d>
<d>1578</d>
<d>1335</d>
</Subcolumn>
</YColumn>
</Table>
<Table ID="Table8" XFormat="none" TableType="OneWay" EVFormat="AsteriskAfterNumber">
<Title>% CD44loCD122lo (tetramer+). Compiled 3.18 + 5.9 + 9.18.17. </Title>
<Info ID="Info4">
<Title>% CD44loCD122lo (tetramer+). Compiled 3.18 + 5.9 + 9.18.17. </Title>
<Notes>
<Font Color="#000000" Face="Helvetica">See No. Trp2/Kb-specific CD8+ T cells</Font>
</Notes>
<Constant><Name>Experiment Date</Name><Value>2021-04-29</Value></Constant>
<Constant><Name>Experiment ID</Name><Value></Value></Constant>
<Constant><Name>Notebook ID</Name><Value></Value></Constant>
<Constant><Name>Project</Name><Value></Value></Constant>
<Constant><Name>Experimenter</Name><Value></Value></Constant>
<Constant><Name>Protocol</Name><Value></Value></Constant>
</Info>

<RowTitlesColumn Width="84">
<Subcolumn></Subcolumn>
</RowTitlesColumn>
<YColumn Width="81" Decimals="2" Subcolumns="1">
<Title>WT</Title>
<Subcolumn>
<d>92.35</d>
<d>91.41</d>
<d>93.25</d>
<d>96.39</d>
<d></d>
<d></d>
<d>97.11</d>
<d>97.23</d>
<d>95.77</d>
<d></d>
<d>98.44</d>
<d>96.85</d>
<d>97.05</d>
<d>98.64</d>
</Subcolumn>
</YColumn>
<YColumn Width="81" Decimals="2" Subcolumns="1">
<Title><I>Dct</I><SUP>-/-</SUP></Title>
<Subcolumn>
<d>94.81</d>
<d>95.45</d>
<d>96.83</d>
<d>96.53</d>
<d></d>
<d>96.58</d>
<d>97.19</d>
<d>96.17</d>
<d>95.47</d>
<d></d>
<d>96.51</d>
<d>97.4</d>
<d>96.72</d>
<d>96.99</d>
</Subcolumn>
</YColumn>
</Table>
<Table ID="Table13" XFormat="none" TableType="OneWay" EVFormat="AsteriskAfterNumber">
<Title>CD69 expression of double tetramer positive cells</Title>
<Info ID="Info5">
<Title>CD69 expression of double tetramer positive cells</Title>
<Notes></Notes>
<Constant><Name>Experiment Date</Name><Value>2016-03-17</Value></Constant>
<Constant><Name>Experiment ID</Name><Value></Value></Constant>
<Constant><Name>Notebook ID</Name><Value></Value></Constant>
<Constant><Name>Project</Name><Value></Value></Constant>
<Constant><Name>Experimenter</Name><Value></Value></Constant>
<Constant><Name>Protocol</Name><Value></Value></Constant>
</Info>

<RowTitlesColumn Width="1">
<Subcolumn></Subcolumn>
</RowTitlesColumn>
<YColumn Width="70" Decimals="1" Subcolumns="1">
<Title>WT</Title>
<Subcolumn>
<d>60.4</d>
<d>-71.9</d>
<d>-127</d>
<d>52.6</d>
</Subcolumn>
</YColumn>
<YColumn Width="70" Decimals="1" Subcolumns="1">
<Title><I>Dct</I><SUP><I>-/-</I></SUP></Title>
<Subcolumn>
<d>-70.6</d>
<d>-87.4</d>
<d>-77.1</d>
<d>-120</d>
</Subcolumn>
</YColumn>
</Table>
<Table ID="Table14" XFormat="none" TableType="OneWay" EVFormat="AsteriskAfterNumber">
<Title>PD1 MFI of double tetramer positive cells</Title>
<Info ID="Info6">
<Title>PD1 MFI of double tetramer positive cells</Title>
<Notes></Notes>
<Constant><Name>Experiment Date</Name><Value>2016-03-17</Value></Constant>
<Constant><Name>Experiment ID</Name><Value></Value></Constant>
<Constant><Name>Notebook ID</Name><Value></Value></Constant>
<Constant><Name>Project</Name><Value></Value></Constant>
<Constant><Name>Experimenter</Name><Value></Value></Constant>
<Constant><Name>Protocol</Name><Value></Value></Constant>
</Info>

<RowTitlesColumn Width="1">
<Subcolumn></Subcolumn>
</RowTitlesColumn>
<YColumn Width="70" Decimals="0" Subcolumns="1">
<Title>WT</Title>
<Subcolumn>
<d>216</d>
<d>244</d>
<d>241</d>
<d>287</d>
</Subcolumn>
</YColumn>
<YColumn Width="70" Decimals="0" Subcolumns="1">
<Title><I>Dct</I><SUP><I>-/-</I></SUP></Title>
<Subcolumn>
<d>224</d>
<d>240</d>
<d>278</d>
<d>238</d>
</Subcolumn>
</YColumn>
</Table>
<Table ID="Table19" XFormat="none" TableType="OneWay" EVFormat="AsteriskAfterNumber">
<Title>CD5 MFI among Trp2 tetramer positive CD8 T cells</Title>
<Info ID="Info7">
<Title>CD5 MFI among Trp2 tetramer positive CD8 T cells</Title>
<Notes></Notes>
<Constant><Name>Experiment Date</Name><Value>2016-05-09</Value></Constant>
<Constant><Name>Experiment ID</Name><Value></Value></Constant>
<Constant><Name>Notebook ID</Name><Value></Value></Constant>
<Constant><Name>Project</Name><Value></Value></Constant>
<Constant><Name>Experimenter</Name><Value></Value></Constant>
<Constant><Name>Protocol</Name><Value></Value></Constant>
</Info>

<RowTitlesColumn Width="32">
<Subcolumn></Subcolumn>
</RowTitlesColumn>
<YColumn Width="70" Decimals="0" Subcolumns="1">
<Title>WT</Title>
<Subcolumn>
<d>1170</d>
<d>1239</d>
<d>1069</d>
<d>1397</d>
</Subcolumn>
</YColumn>
<YColumn Width="70" Decimals="0" Subcolumns="1">
<Title><I>Dct</I><SUP><I>-/-</I></SUP></Title>
<Subcolumn>
<d>1470</d>
<d>1397</d>
<d>1315</d>
<d>1327</d>
</Subcolumn>
</YColumn>
</Table>
<Table ID="Table22" XFormat="none" TableType="OneWay" EVFormat="AsteriskAfterNumber">
<Title>LAG3 MFI among Trp2 tetramer positive CD8 T cells</Title>
<Info ID="Info8">
<Title>LAG3 MFI among Trp2 tetramer positive CD8 T cells</Title>
<Notes></Notes>
<Constant><Name>Experiment Date</Name><Value>2016-05-09</Value></Constant>
<Constant><Name>Experiment ID</Name><Value></Value></Constant>
<Constant><Name>Notebook ID</Name><Value></Value></Constant>
<Constant><Name>Project</Name><Value></Value></Constant>
<Constant><Name>Experimenter</Name><Value></Value></Constant>
<Constant><Name>Protocol</Name><Value></Value></Constant>
</Info>

<RowTitlesColumn Width="84">
<Subcolumn></Subcolumn>
</RowTitlesColumn>
<YColumn Width="70" Decimals="1" Subcolumns="1">
<Title>WT</Title>
<Subcolumn>
<d>24.3</d>
<d>47.1</d>
<d>55.8</d>
<d>36.9</d>
</Subcolumn>
</YColumn>
<YColumn Width="70" Decimals="1" Subcolumns="1">
<Title><I>Dct</I><SUP><I>-/-</I></SUP></Title>
<Subcolumn>
<d>16.5</d>
<d>59.8</d>
<d>29.8</d>
<d>39.3</d>
</Subcolumn>
</YColumn>
</Table>
<Table ID="Table25" XFormat="none" TableType="OneWay" EVFormat="AsteriskAfterNumber">
<Title>Tim3 MFI (tetramer+)</Title>
<Info ID="Info9">
<Title>Tim3 MFI (tetramer+)</Title>
<Notes></Notes>
<Constant><Name>Experiment Date</Name><Value>2017-09-18</Value></Constant>
<Constant><Name>Experiment ID</Name><Value></Value></Constant>
<Constant><Name>Notebook ID</Name><Value></Value></Constant>
<Constant><Name>Project</Name><Value></Value></Constant>
<Constant><Name>Experimenter</Name><Value></Value></Constant>
<Constant><Name>Protocol</Name><Value></Value></Constant>
</Info>

<RowTitlesColumn Width="84">
<Subcolumn></Subcolumn>
</RowTitlesColumn>
<YColumn Width="81" Decimals="1" Subcolumns="1">
<Title>WT</Title>
<Subcolumn>
<d>53.9</d>
<d>60.4</d>
<d>41.1</d>
<d>30.8</d>
</Subcolumn>
</YColumn>
<YColumn Width="81" Decimals="1" Subcolumns="1">
<Title><TextAlign align="Left"><I>Dct</I><SUP><I>-/-</I></SUP></TextAlign></Title>
<Subcolumn>
<d>77.1</d>
<d>53.9</d>
<d>51.4</d>
<d>50.1</d>
</Subcolumn>
</YColumn>
</Table>
<Table ID="Table28" XFormat="none" TableType="OneWay" EVFormat="AsteriskAfterNumber">
<Title>CTLA4 MFI (tetramer+)</Title>
<Info ID="Info10">
<Title>CTLA4 MFI (tetramer+)</Title>
<Notes></Notes>
<Constant><Name>Experiment Date</Name><Value>2017-09-18</Value></Constant>
<Constant><Name>Experiment ID</Name><Value></Value></Constant>
<Constant><Name>Notebook ID</Name><Value></Value></Constant>
<Constant><Name>Project</Name><Value></Value></Constant>
<Constant><Name>Experimenter</Name><Value></Value></Constant>
<Constant><Name>Protocol</Name><Value></Value></Constant>
</Info>

<RowTitlesColumn Width="32">
<Subcolumn></Subcolumn>
</RowTitlesColumn>
<YColumn Width="81" Decimals="1" Subcolumns="1">
<Title>WT</Title>
<Subcolumn>
<d>41.1</d>
<d>33.4</d>
<d>52.6</d>
<d>38.5</d>
</Subcolumn>
</YColumn>
<YColumn Width="81" Decimals="1" Subcolumns="1">
<Title><TextAlign align="Left"><I>Dct</I><SUP><I>-/-</I></SUP></TextAlign></Title>
<Subcolumn>
<d>53.9</d>
<d>44.9</d>
<d>42.4</d>
<d>42.4</d>
</Subcolumn>
</YColumn>
</Table>
<Table ID="Table31" XFormat="none" TableType="OneWay" EVFormat="AsteriskAfterNumber">
<Title>Compiled number tetramer positive (pre-immune mice)</Title>
<Info ID="Info11">
<Title>Compiled no. Tet+ pre-immune diff epitopes</Title>
<Notes>
<Font Color="#000000" Face="Helvetica">Compiled no. tet+ pre-immune for different epitopes</Font>
<Font Color="#000000" Face="Helvetica"><BR></BR><BR></BR>Kb Trp2 180: see No. Trp2/Kb-specific CD8+ T cells</Font>
<Font Color="#000000" Face="Helvetica"><BR></BR><BR></BR>Db Trp2 363: 20171030, 20171027</Font>
<Font Color="#000000" Face="Helvetica"><BR></BR><BR></BR>Trp1: 20171109 (samples were shipped from the Restifo lab)</Font>
</Notes>
<Constant><Name>Experiment Date</Name><Value>2021-04-29</Value></Constant>
<Constant><Name>Experiment ID</Name><Value></Value></Constant>
<Constant><Name>Notebook ID</Name><Value></Value></Constant>
<Constant><Name>Project</Name><Value></Value></Constant>
<Constant><Name>Experimenter</Name><Value></Value></Constant>
<Constant><Name>Protocol</Name><Value></Value></Constant>
</Info>

<RowTitlesColumn Width="84">
<Subcolumn></Subcolumn>
</RowTitlesColumn>
<YColumn Width="81" Decimals="0" Subcolumns="1">
<Title>WT </Title>
<Subcolumn>
<d>1030</d>
<d>817</d>
<d>891</d>
<d>771</d>
<d>2336</d>
<d>1778</d>
<d>1346</d>
<d>1352</d>
<d></d>
<d>1265</d>
<d>1274</d>
<d>670</d>
</Subcolumn>
</YColumn>
<YColumn Width="81" Decimals="0" Subcolumns="1">
<Title><I>Dct</I><SUP><I>-/-</I></SUP></Title>
<Subcolumn>
<d>828</d>
<d>1340</d>
<d>1462</d>
<d>2094</d>
<d>2044</d>
<d>1470</d>
<d>1577</d>
<d>2383</d>
<d>1613</d>
<d>2638</d>
<d>1709</d>
<d>2098</d>
</Subcolumn>
</YColumn>
<YColumn Width="81" Decimals="0" Subcolumns="1">
<Title>WT </Title>
<Subcolumn>
<d>26</d>
<d>5</d>
<d>20</d>
<d>31</d>
</Subcolumn>
</YColumn>
<YColumn Width="81" Decimals="0" Subcolumns="1">
<Title><I>Dct</I><SUP><I>-/-</I></SUP></Title>
<Subcolumn>
<d>37</d>
<d>33</d>
<d>48</d>
<d>50</d>
</Subcolumn>
</YColumn>
<YColumn Width="81" Decimals="0" Subcolumns="1">
<Title>WT </Title>
<Subcolumn>
<d>52</d>
<d>82</d>
<d>64</d>
</Subcolumn>
</YColumn>
<YColumn Width="81" Decimals="0" Subcolumns="1">
<Title>Trp1 mut</Title>
<Subcolumn>
<d>63</d>
<d>77</d>
<d>64</d>
</Subcolumn>
</YColumn>
</Table>

<!--Analyses, graphs and layouts as compressed binary. Don&apos;t edit this part of the file.-->

<Template dt:dt="bin.base64" xmlns:dt="urn:schemas-microsoft-com:datatypes">eF7svQVYVcvbN7wJ6RClQdgg3d3d3SDdm5KSTgElpUukS0FAQkFSQCSV7pIOpSWk
49sb5Og5x3P+Ps/7Xs97nvPx4xrXzKx77rlj1qy516y9VBKVkJBUEWaD8kUBAABR
UFFQ0OBkCtCEzgRYgGv8YQC/A6QM9S0/Ak7Q4DIIYPsjyd9CHaD6x6pzQPuqUQIA
woAL7ubgdA2cdsAFYvARCZywvlEi/5AgdRB6SB5yhAUneHBCACdUcEIDp5vghA1O
eOBECLjgd4UrXOEKV7jCFf65gNzTocEJsgiB3NshawI4wPd7PCLgYm1whStc4QpX
uMIV/pn41Xs5JJaHPIu4jN/Rwek6OGGA0w3ARTyPCfj+POAKV7jCFa5whStc4QpX
uMIVrnCFK/w6/ivx+RWucIUrXOEKV/jnYh4Wcj8XAedUwLd1Odjvx1/H2dkZ4At4
dQCPDlkFAAA2MBngpQHceekOAOu8hIB+yfLaxduBsIAUom81/wEpAADRreKL5ccy
kh2CKaQrgNR5WQrw/WXD/1MgnC9ifgQRgE/QzcYa6AJycLS0s+UnZWZgIgWCbE3s
TC1tzflJ1dUk6LlIBQWQ+EjEFEXVtJTEgfbWlo5OQCV1ETlpUSApPSOjsL29NYiR
UUxNDKgkJ62qBgTzYGQUVyAFklo4OdnzMDK6uroyGEGoGEzsbCCEjoxKDnb2IAcn
dzkwM3pwAwZTJ1NScDcX3H8nDrjW1NLESQAJke8uyF0AzOIbM3sHS1snBiUjc5CE
nYONkRPDxcEJLLkS5BTIgY8R0gLc8BuDn3NwsjS5C3JiMHEAGTnZ/dYGkc/RCXza
/AdyKzvjC1o+xm/n/gNLSyeQjbCDg5H7d6ZGkCIk912ov+DxK4pB2n4TRVxJVVHB
4I6EAScHC5OBKsjBEuT4o5x/0cs3SR2djJxAEtZG5j9yhnRlDnIQYOJjvMyeC874
mzkZL9X5re6nnfygipK8lJ2DpYedrZORtQpEwn+Hh/5CLUhLsNDWApwsfIznmb/m
9j/vCUXwGAEL7AS+1P49fviJUj9akPn3Fvw5w/95V6iaGFmDzfTvccMfFIK0OR//
zP/A60ADfCeyNPmXzUc/Ueo3J/wjZ6NLgf91l8JfKPabN/4hl4Sjs7HaRT/2RuC1
mYGlrZmdwaXNfuYLJXklJTElCK2onSlIwcgG9N1Uv9nnp139hdd+1W1/y/TPfvvR
cT967j9q8YNEciCn82XXj+upvxXjZ776S2f94K0f3PWjD3+TVM3ByNbR+vz2pnou
y7no/6uN/wsq/SCeuirwn+EMNUs7c6M/i/q/yvp/ocMP8tga0Vv/A8z9x55+N8EK
m1o5OzqBTCGVKiCT36ar/02++CObX1PwD1z/xsp/f+piVcDJzsDMzc3NzszMyczF
yf7jbemShp37b2h+cB+k9DO1/p+PEPBQ/5cPkT9q+Ae2l56k52JgY2JiYmFjY2Zj
4mD5qbfBNKzcEHAwc7GzMrFwsrL9jIyTi5WBHUzFyc7Oxc7N+vORw8H0d0T/sKED
tqE0ePnD8H1xIGZpA7KFPJT6d4ycX1HwD1z/xsp/f+rC/cy/izkuqzm5f1/9zx0H
f7pJ/lv8/yfFfhDyH3v3/y6/uq3RX90d/yUe+hsN/8D2b+z896cursV/2f3/5xb8
4+3xXzhI/qjiH/he+vJqBXCe+1lP3y1rb2/600nyXzFs/kq5HwT9J8Taf9GTsJK0
xsVG4XevfBOTiYmBhelXn/Q5udv/4Nc/OegPRlP7o7N+E/bv+vizrH8l6t9x+VHS
vxb0Mir4o6SXgvIxnu+yCiDB+UJedoMDwJ9vj19A2MHSyPr7BvF/xBsIi2+44HOx
Wy0FsnYBgcU2+n76bxH1wyb3BR8IY6j/sjx/5gN5mQ8aoOpuY2z3X2D0Zz4X2/tq
4GWyI1AB5ApUsbMx+s8f/fkzH8hLhQCAqJ2zgyXIAcLpO8Hf4DsfKACckPe5NGdg
3L94UZEMAIj7bXdfF3BZgjSCUF2UIBb9XoLY5Xvpkl/oeU7oDACIBwzAX/zEEFL/
35f26nNEV7jCFa5whSv8vwbkfpz8bS0DALQAXKAvVgJXuML/LKCFuM/jDwBg/nxl
OuOLCBAEH9Vt7Y0sHUCmQCegE8jRCWhnBlSwYwCqOdizMMoa0zvag0wszSxNgKJi
XLRANaAJyNraEQgOzoA2ds6OIAASgO4P78tClq/XoC+Ovz/z/09AzHBpI0gwwnP+
bZGNc+NAAY4uKM4qAXSAi7AA8qunHwGmPIN8ieSP4P1tWuE7bwv5pdRlyPFXuAxC
EIBeAMjryL/e4v82+M97BgAyfguVIGkZcCkXBBCjQWp/5fdhv/r9FkgghANOuICL
gAgfnAgAF4HRLXASBAABl0Hst+AaDtL2wgqQc5A6oXP+akbGztZGDkAHkKOztZPj
D21/A8L3oPBCX0jbc64/J750xy8RX/rml4gvI85fIoZY+peJIS75ZWKI7/6WGFKE
JCDYZZdD4zLSvjC7uKOTpc35+ytAJWs7p7/oCDI4ftIREhAI+DMxZBT9SIwM/Bti
yHD7ZWLIuPxlYsgA/mViyEj/ZWLIJfHLxBAj/zIx5CL7ZWLI1fjLxJDL9peJIdfo
LxNfPmX5JWLIjPHLxJCp5ZeJIXPQLxNDJqtfJobMar9MDJn+fpkYMk/+MjFkQv0J
sQRACvJ7HgRYgCFkEF/hClf4VwByef9uEvgGyCTw34EBeNliAIAsMf545mfY8Pmn
Hi9tAtEFshCDHCH4tnSC0P23EoTHwDmnvN/iB3D9X8Zd59PvN/xai8upG4Jfa/Gj
/3+txZVUEPxaiyupIPi1FldSQfBrLa6kguDXWlxJBcGvtbiSCoJfa3ElFQS/1uJK
Kgh+rcWVVBD8Wov/aalQgU6AiydBEEB6v0xkgIsncVTgxPWtDKmH1EEAedQkZuJE
z0gPdHFkAN5R84FBhIKBhoKHutAB8i9yJ+nGp7segpA8pFdIvHGpIbfQjO+F7IYA
QijIK0y/1x6yZ/Hj3s7fafR/E1CQR7dQhuAc0rnOF/aEgUI4PzJA4Z4focFaQo7w
UDDnT6tRoKHALSE55HOlIC1F0YGAjnOOlxa5OEIs+t3SwPO6nwGi8IWvYL59ieYC
LL/562dARC99AwCQK4lJ0DMzsCKRNy1sLazkbmf0NLUgsQGZgHbGVkh8fEBGOZCt
uZMFkB1cpQJklLC0dgI5gI/WRk4gMZCJnSkIKCCA5OjkADKyQXKDWtOxifwohXG6
btBLXBtkNjuc+NLfv9I3SghaAc9JhJDYUJpBuKaV3NOVam/FPc3DsoLfJtI1Fh1D
hnRtIKKgXV2vWG/wiMMLazKQhs3mVlI/CWHgl3XQPo8XThq/z/PGNdHnjY3018fy
kfa2YntShY5ffDljeINWjERn4SRcGJp2goZZ5x0cyvvMAQfA1ppNN6RI9+lImwG+
QWQyZAE1of4aex2oFb3ueFfAyx3N2WSKI7NozNuV8FAJfcaLOC21e376mOa4kOrM
4abLYB3igiua18ZbQUK3ubc1CWgn7X72N00P0DkDvCLqV/buNTeic85szBwffRln
3Y1DufORW6p38SnVlkpKEkNZayJmJt+Uf3WRKJ7Wae723px85tbEASfGp9Rtnkdf
v2SbiDuV0D/g9z0hfVVPHCE/hXqdFCZPM4uQM2xxINR23VDc2+KwLsNyWjVc1EW0
7JDM5h3weecXjLI8badM76DjvTNFGwaPHPf52sq6Q/aHvjygHRVH272uzx8Vt7pI
N7vQB82Vu75ynnmXChgZERh3cGzQfWjipT8Uc/WMc8V+RkBR64jCgJdOeMK2kRpQ
cOeNqskGvIc5c/hr4gx5ZCPHtU6fqaxOY8+Wynx5k5XbFv1UoNdVn1OTyDdanaQj
V3lDX6SKD5HZ3fc1vz+08ESneL6TXS9C/8nDxTQtpi9dW4vm3WL0e3meOc8kOpOT
6KM5kbkoB3L1D0d5tV7q2JyGfGb9FDvnml7raAIuWDjS273DYLeTiLS+25nM9enD
PWc+O1vGnM9TZMlc1VGi2grvFxUbsLHpzBAMbrCakhPnkJUNTX5IjHls/WB2Qpqg
GXHJygfBTm3nE6N9Oe9uZ88mWa1gy/bkppPVWB29Pl83UW2BPdea5+rDMmSErafD
X7duhcpBbbxDTnkwqhO1DTQt6NWhelHxBYFDJC3ceLjkFQWxDSijjtW8Scg2KZjO
kCgx1wEoaYnScbsUA8p0HO0VSQaJuQKmENFyW6BvQdxK9W0OGdcmZb/h3nETMn3k
FElOkpXGSh+kT73yHYcDEQPX4DyEUQ2IUiunBkmyaN/I1FoGeqMj5zyHbsy3EJYd
OBJLhQaTDix+XkRcPs+ZKSHjmMHCHcY8/yjWhqwKbCJvL9NBQDT9IG1xCy9i7imW
rkTuE2/ZnICb1yR3nmFPPSDIEnfAQMX+GDUZXpFPwp1w3LkLnIMldTdvadCTSsnZ
mm4SmAbZk5rgp4xo3VWwiJe+ExPdFlmB4NvoO7ydJ1KMZZt325jDdx0p4AkKbP+D
4mJSCrQPEojXh8V45ICnx/rUeDnKw7mvAgvlJ870htEld+4cLK4rzUy9GHzU+UBz
UjlbiAbTR0G7EGX6gCzbcr4uWDhdyBl645Tb8jUFYiAzcRVgfD1qUJRPiUCL2sak
rhoou+ZET4oe7ARd5n9oxaV+S4yWoqvDy3UUhn8VPagcX2RC0TMD5H2z62xokuYZ
41NWvdabxWxJ8lZ3SmlwaDAU5hTkXACdZnb9Ljg2Y3Sheq4NhPix5pY92HMkLByo
xp8oXRh7hj4feRN8MGhNc1pFEl/dE6zf6WLw6DXZMJf/GqVaQIRTGYih+nVf7Csr
Bp/yCajAVQXJ8YjCNNSfri2WbsBrWjC/zm6BOLNXazufsY+irqCOv1NtSk49PZW5
hOqmQHOx+H2RD9Rqxb4lNCUIbAL8PbV+5OnFoab4L73TpdYevMBMldhdOmLDc9kX
uLVs2Z9jzbkWGyK4HiEUBJfikO4En7ONuxqm3eSCk8gKj+O+nh10xnU9nF+BfD1b
0m1jo92J7qXxsamuqwFZBhX9tq9P9SarfZh5HSEb86n6q0VVRbbTFyqKE3J5ExLP
Hu3nyATTK/E+UQFResFbt+3CPtNn2utvvA/jmQ+tHmEvsjAA7xx+aEgCW+39Mc+c
TOd5fvyLZb4Y7zIHTdnOltD1e87syR3xJ1ibiXydmOy01LlZt4yYt46p1nS32l6w
fbKN7cZaaPpEx2zTwdWTxX0rwGiQuezV2RYzxhLGPcyczJZZXjbKQ2XnMY1SJ8eR
56rR3gNkJEYDrn6z7YHBTKefn8enePEx9/oOXJNWY5bZuk2ZiB/u+/5JLp/+KJGG
cvU1q01SLs5PmpZsj7wkIls5+AUaw1Jm7FPw0NuVCErvH4R9xZI42Wrm7RbWiMci
z6dznw35FITQ9A5VlCv1tUlEqW401lwtfDBN0o3ol9Sp+h5RkZ2TynI3+thjCuqE
VQ5k6JLDlueMFglynx8vrBBFqT5RS9VhuBHtDU+RJVgIne4YqJl7iG/+rkjw7JhV
ZqefKIHqODQ9S10Xm7TnwI3A+Nmqr26WUQL6MOf8C/bkrpl5Dy1Q5JQ8m1cAmRR/
3lDXXTdcs3V+MVTGdBb1yOVJUi71CXumEMpXMKyogs21n1LEUSORnMQPP2UFhrIU
GDmbGfBPhlfVRz7eXD/5OFhKqYihgyLc1Mrx5UueIKXnPUu4EEu5DoC/BkIRfsOj
5DueO7eS7OtSn4jW2CWLeot9Qo3sQ1YD6U1gLlV5znwRLxx/mfxY0XMabkRgH01q
7eSpoaD5ixFDVMbZ10V2/Lat/eJeOx+KnJsZbbOXb79SXMtGrXWNDalosnZXrosB
PlwxA5ClNs0z67+rBq7O11HfRA7U8+1gPNFaYMmYfUy5iTyQYdU29fHYyvZFFsNO
/LFI6kRrwWCZnDivRWpLfnoRHTeFNefwXTJWOGTEYhcEKm3n1ajpT9iefEMTiC6t
EsoOec9fmKdmkYeSN9rmHqst9Uq2WTf2W5ev5L50fth5+j6OQJ4sqZvhybOWfsc3
OdO7Bwac/sGvtiV7n2dnSphE2AW3rFIk4GYn6XIYjTkHS5kZP9xGY+XxWwM4iiZs
aiof+I+wWHs4PSlFFXEqM4IZhuMfyp+bFqaAYWHVwt8JayOA4xcqp373LgO+C6s4
IjwOB47fUtRLrFw4EgUWG54fkSeIl4NOi3CH7LMOmJKTufRh2gGV2dO0WzsdQeSI
PPD89vwKlH3C6I9IIkhXbtJl2S2fAhLIyKb0OkhTiVBNXJ/Shoaz0Uem4zjeblyc
z1SyxhN5YbLCJtqLpd/yqWv0WPyJsltTdwcLMKWbZfGmQgltvluZfTmW6ow9i1dj
Ar2iR2EV5TC3N67xe92kE5WJmScdmYiBNP6mgL5rtyxL+Okw1OAICTnC6g+oWoKI
y18BsYpmLQJ2ELjZTzn6hrAefdJdQmqy9r6N1L3ksciEyl/V3xXBqhlKnWrN4vNx
phpptXGxaau2Gb2hQopkatxfp64iAzg1TiZbl3smSwDz1KaPdqqmoB16z9nbeE7H
23hbx1sE3sVYIH+QkiNukJ0jPp5y/fFWE3zJYZNE4aHYR2XvQBOaQedb1+N6p0Z2
hwEjp5Jhz/fhsvpN4PzWYWPuqvHIxdajVqoECdXfz5L5sIh4r2brw3ATrzYc3ubx
dfldAB9V0IeE63h2GghipA9Cp1Du1OF8bHLUNCPvI7t2xmVNkJnI5vHJ1OvEn+tj
W0g361pSvSJMxFqixFn/e36YZRziquDcutZg9xq4/UXmt3tevOGnjl7bZNPJxJ2z
X1HqmdCzuZdtYp296o2hjo9RQ6verEdrTp+6LaAmOW4w0zVE+eXtLxMd6CEXRVm/
KSO1aihlurNvE2p5I21N9c09P6zZjeGqvmNah6d5XCGJ27VWq5PXpqLrXe41xOvV
TiM9IKh8NY6jO5PA+ComUtrh5FD8XQwLfQIZZpnsjRLNyPtpeWzQZvBfPVK0cQdE
hW4N9y+kUvFAdaQ4s2zuGbW+NTY35OJ1eh5yM7jVrTMqTvFWOiW7n3VTyBuqqOaE
TcZyKjaDtgDK0Ju+vkXUeIrXXgXQRvcEA4NZRjCXxqX9DwRCbEmPVTiHE2MwZHmO
O7sGztzupW2WMipQWSzMuHnVNRjIro1nee3V3jbRDqsMMO9epfsaxPVoil/shZtu
VTilD/9LHNDx7BC6yD2HA4LccIHndfM41LQfYourw2GO3YYevX14W48FM9J5bxPX
fK43ywsw3h5uflqYSPgFlJyJy4qvjDGYs23L9xpRYFBCN1U3Ehf6Pa56GlLZ89lR
Yt22GiMqHNUyBkLtuwyv7YEnnkWVmRVceRGow1qwWTPU/G7wpxuGofKfzRu5CItd
i7Yn5F/eS3d6yytDFyVHLe4i0py1Wkpwm/ZVdsbrFnwF36jajxw8zkRqsTx8mGgY
hF/RbraXUfIA5Ueq/VgNUhRvtBfPWNwZ9333AmWDNPRGwSysFICTJ9EYQ7mOHKh6
4wYGwE0F9QMdiQDFdZ0uaD4Vbjl83A2J9/0CVFk9XkVKNzajiLeXvQsHlp46E2uR
AdcMX4aOihniU95JtQgBr9+TOe7W7z/QpplHV8Ixx24Ja4ZzEBfQknh0mtPi33j7
7K48T/0JSVzW3b4ncIRTueE8prUvc1/koAue0DZu+OLyH5SWqz9mj6XONhypdjKd
uXdSTd3//uS2fZLlSMO6M9lp8KL2F0tR5Ra2h4tjuFGLrw897tCljuDtvZRpyilN
fIALVCrPL/tcVaWhuFkxsIx4mqPN3zClVgAj+KGmUENxqqRQI/1FiQseh/MzjXR7
UK59kWbRYL/r/hIhrYbV1/dIK8n3xB3Muss6RzQqNMYWhLul+2yL2LtumJRWayXp
IFF20i8xgmpcXW7a8/WRZq2AtJEFHcQ1Zslmg13utRmtHmSIfSUNBBUYynDD8DjM
MBobx7sG8T12z2vHTywwKMWMEH85WPoUUUZmot2kW3k+YGNY3UuQZEMgPJXp89Oh
CDgZG6FAajUQztpJdfbYwbuyTiqoGPYtNaCDRxnR6L6CX1h1MUmuwQn69YT0XSSQ
rem3kBGcg0SakPAScmTlYGG7rGP5IQpVc7cHARkhv2KD/OsAsnUCsl5EpCogRztn
BxOQI5DjokLUztYJfN4RCIliwWV5kKmlkYidG1CHCVzBynSe9JDAUeu3fiDtLvtR
crAzUQU5AXXAWTEJcL8gNyegHoSptZ2Dqr2RCQgIIRN1ZAFyfevOkRXIfZllBnJC
smDmQEZxNydJVcjPHs9bSILPMX8TWRLchPmbdJKObEDmb8G1JJgr84UWEAYSYEUu
lFcD00OsoQLJg/lAFDnPg+mZL+m/K3Tez+8t910YRhMj8NkfiH8M9n9KzMDFxsn8
Y4tLZ/1NC/Yf6X808M/of8ccYsBL4m/PHpi/mVoB7HNGYcgDCNvzpmIgF0sTkIqk
yH9+LhGgrhNMoI57Gsv9Hqmmq39skP6paK0TdY1sOdbEs7Ikndiyu/ivRgexhUtj
Y007Vsm65PqQvWkezIYW1EkLv6mlR3jQ59EwBH+kkqek4bpCSiVQ5iZMtSNesckb
a0qhZZUM6vbaPpk6sPuUjpfl91qktugIK4u8kcPx/fOtj70mH97yHCyR4D9Vxqd7
rsEf09l1474IbdFJvY5glCLTHcp16407dlUEdA6y5FsT8HUaZQPk0zfF/EqtJspC
4AIbFIkrVqBDCQPlyRCOs94ucASGB+KM77NLxnY3Z3Aj0xXEi2C4XXPzehnEuDft
gqb0VjGG4OOAmvgO6d0hmaSuW6KeVUFVku6clU85lUq3x/2c2/K7brU4o7yuV6Fr
upYGq6+MHMI9LelbzP46QA5+qmi8l/CLidhpaviyF6wbp32+KVEKfCBxvZbl0+r9
VNX449LpCr+zFs0OwqVVPdVCXA9p3oapoi9ln+2CpVTYeFPBtEu+Wu2I/A5RMuJE
ioBImHr9wlvY3G9zdxIHU26+aTNfUyOn2MI8XkhACnr1NvttvQM/9U4w+YlORWkq
oWZbDyspg/FLrooUj5mggFUZgWtE9xJtkw+69Mt1+9ByeA8VacxkvhhvvK5e76By
QN7vlFAYiND0e/8gUQq60RzYHu7eq+iXXDZNez0Xn95Y/X2GvAqVpPSjWW3Km49v
WD59OFPiwEToqtfpX9qdReMWnhTR+S7JOW4tVa9QBFQCp+daRtMsQqwMk0azAz/y
aEU1E3cdf/rD2Vxuant4RDo+gZFROc7Z0QjdeHfOKAr1KvUuG+/bWUPzEYFhV2zP
aqwQL1ugzHh3e3DbrQloq/pgfBsaw5Nrj/C1ioLqiugiOVr42vG2r8nXbrVM8df2
lZQu01Ac8njM6/OjH2NXEmk2VxON2HtT+aVDE+zrSNq90bZKq+0H3VPBVygbyh33
wNZTh41f7uoidxIW7XyTuxiiT5yg4HOQgWMTn+p5utzzrJ/cxH3ARBxnvyBRB4+H
df3lDHGjT+Cdxo0AQZQzhlp6bxpv8tQEgQSGWFK9KAYZA9kpGWJZg8rDms4oz10y
FhxH8i3s/sHCkorhJ5rcNHYJxI/nttAOlN2H1Km3gvnIc+f1SqxduzuT7Z5VOOws
UGU5Hzl+0pzV6tVV5IKZOnkC6Awd4YTZbtPMnvtimTVlPInCg2izETucFxwwgilr
l7huybytN9UgxkQUFnXj460URIVr6IgfvR8/rDFMbkj63Im6PUNzSLPAIUhSR4lZ
MKiYpF1lTOv5boYyHkHAW1eaYHm+UqXHuZlZ69F7elsO93sxTa6qq7erEx3rgups
7vB13Q+0ODNw2/PeuNeKL0aL3ds2R8QZ6LoAs3Ej1VPE5klnueDWQd3tVzKee1x7
dZlUkwaCFdqcm0QEbqEW250aK+l7OoWd6NM+Dz8/OCXOSPdS//Nt6nwmOs8wcXJf
Vl7Wge8Z0qKiIkaOIFPg+TSmAtT7rSHkFvGHaY3l2zT+fzCtpT52VVMdxQ7qruWs
7blBCiTfwfdABPbxSmHBKodI+ypBB/pTuIhdk8DEoNYwVXsLJRlEaiKOifzwgfEw
4tZ1pZYGZTHxhYmwu4gbhezbk0knrVpTo58qhkfNN7yHqwFKxw9g3zlpQvmyZWpi
rq806N642d60B417HQpNE+rtjJkZrOS+GPTAcS1/YuJzqZbS3XUGX9Oacbp6JQrH
oTOfaFJOUTI4AJL4IAfffQqcBeg41dJmPJYz2A878dQsgcws2JmIWS9I55qKrXdz
F2lr3j9JoJjPxNfqwnvDlhZWozSZRD6THQabqfuEfNo82wseVKsmnQRY2KPq799P
kQMwYSYadHyiyLQOYRHHxFsP2YIGIMQ1cb9xQAs94LZIA7jlmM8/gg2RNs7BGH5i
ufC5zexws1T1wJiZNq5RfibYTa57pwwlggnHt9jusTgUuZZNokX0WiHh2prW0KLF
Qf3oFNF91RP+No8j9U2K1e404bA0rSnr1ReMtdiAXTLt5FuldfHqgDIbOKGFmReK
G0DA1jVA2WTKNlGgtX5M0ywKJXLo6qq1I1T6XQbaz5xH6Q/sPtQHcu8ltq8fafDm
4Aj63ZbGYgWJL+Tk5siKdXSgoCV0m57sXT+be8tt2fm+kS4l/S3OZsBndeXPcYj+
IRY1AXx+mlEMpkj+PoMzPrgclPB491PvYlo4GwC8A7iVKqXh2+z4AaK3YchsBT2g
vVd0rjMjtdW9sSiMLnaMZPE4/XRIjKz7yHZGTphUdXEXJdLUgTyLDi97yt+6AfpG
FLxTBhKbHwMTNJ0hKqEvqz3MJBDg7yt1HeYxDIMUtKUQ7CthgREAkjDzCJTLQyt7
wICfRw+swgMOezhd2DtvUe2RUXwlhZACG2SZoCb9LBEefLmOlSWcH4X9FD1RZOg6
gTaCu6iwEhcmTLNoSNT1GKGDHornuDQP8zNFlfh3bjvhVyPoPTzMgO8BssGdQHn7
YzyB7jdCHQGU+46W8BIiSL5rnxZzw0qBx3k7PiNTiS2AVvEOZ4bgC4AuwOBdLIJQ
GwJMr4QmAsGmmEiUJhkUBsndaNKn0HniSVFoTwmqwqWi783DwAVlGj3BxW7BmwvS
Cpsx1jAaMpZhGnxi8kRDDmeRw+w6q9/Bg2fGgy9zNClfCLogcmAkh9M3aRhGGuqU
JLyEGTFa5SVEa32LN0tof78SV5fFlr0ItgJ9OKzGd6URdYZi0+0NzSTmxgP0Bscv
xl4kdUg+hD5EU5HELfWUUYjasHcfoJM8BpJZk6ldx0f4hHDij/GOTdnvuaITaeB1
9yZdY+qXESPCb6QJKRRiMaUDyXBUyKgTy/zUpK1I9Sj4KWpJYt/zmEo64GoJ6SsW
kaUDDcjRYwSV4qgoMBVlCMVFRhW4ZaqE3IXcRZ+poD63HdDMf1Kdqq1YK+Yt480o
GcuasJ0w974wtiD6bvxKgie5YtxwgmuCAUM6pQGJj8xpznEltHKDUIOqX3aJRqbE
TNk7/gBp8aSseONg4yTjEOOHs+zNyuRvYvxiKm4o5gktlfSRPyPBF+l/5t5XWSZf
xjMGGmO6Jcn59Kg/dql5h/hz7Q4iiByks0C1QLiAv1D6QQXuHZPhPqsK3rOw2LCa
sMhttsWq7rnucY5iS/2zN9TxBzS2NF7xpPFm8VDxkfly6naDmIOp+Tb5igNMVhRW
RlajVkeDDAXh3bndrmndqQZsZ/PHQcsl1SEelYdWXxuX+Zdj8ZPw6/Dx8NXxE9ha
2PGSbJPeJy0kfWJrLbPQRn4Nq72g/em1PlN84nqHmhl5aSh3ZmHRWi59r8DTiQL+
QpPnpZrm2QqlXTf1Yhh0OIUrdCtUXUUUZRk1GQ2KlTcyBZTTC9Of1kvW6/h8eNsD
HDMMFU5ueJ75KLPeKM0oe8bkdn50QS9NtnY2bwuXSfm9R5sCczoUJSGp0jHS4e/l
VUcGJtUMq7vLulHuLlpQsBWw17RmlXzU0nohMZTB3cjX5pXtnnxAi8wfqhmaij2B
bUC3RqdKv0JHrEWtdU3Tpmy55LBxrCnprp6Jd2ug1ZxJaVfOxOLrwjz6KZf6NW/e
JL2SCewahZruXbRd0iOKI2Z4/iC3oFq0vREnF6oaf+9BjJXPM5Vdm2Fz8JSelC/7
pXOnUrW6qLtQu7KRUXC+4AzQ4zr03pupJHSIZjBlCDNws88cUB+Pn9NeOeyQHw7/
5NJk0zQxwj96UnlEiy6LHi0Z2hqXG/sJvxtZPzih+E70neKKmD3jDauNXAEegRCB
cIGbdS51Bd6M+0Yn0CcuhxPbw18+HQ4fKcJywb5A/Iz0FFYCVgNeAJkF8cY1Z9jG
BqiGmgfEjH0GZLoD2NAix6IuAXyI7Ch6WIeOuAx0bC8oVt0r1d3uu7nC0huLi4k2
1UhFtvW1SYaGY8tiu0q8l2wWH5SUF/cUTxCXTdCk0yqdlwjTDgPm8GMTE2B5krk4
5O31TcgGza3OIs2tM7DqPi5dHXN4vZDX3l0UZdCgdY+GiID41tT1s5Cb7/IW5Ip2
DKpcF2CHY2uCjmI+tdB+Ct/U2wcdR8Mm+L/y7xVLaNILMZEuksaSnoNWFH497fzK
YMtvPi8uKi6bmjWvN6/T0r9sv6xfhNzoUQmtHis/ZS1jI1s2k2j1B8vBdfWbWUK9
0XJUjlpmNU8iTuW+SoWRJZM/1EIutXo1aS4JSv+g3IGxuDOfNG/bfuv99vuj++xm
7K7O5nUup4HHDezrd9EKA4aKdMerFFz1GqpnvtatRNoAbaRGv7RLtIeDCKZsH00O
KGcol9QZWpRuLLaIVIkoz9TSd+mgWTdbY1mvTZiVFlqNJ5Dq9341bp99NKtI/jFm
ZUrL+87BRMeu/1rts91nR67TLgiuHyeWqrc1E4219Ed7iqb1Chc6trK2KmrurNZp
GOncM0S3jDSNLGN5/qpWpthKcjB3+emyH35k0mLtsmfFWupY6/hw/ZSNTz9UOEwz
vAARJuEbn7Y9pbuFwjbNRh9nXjR2r2QtV9eb+xj4iK1JbUZ3SwZIPmt9F+k8yDsw
zPmcM47jXXhMy8u5e612J9NfRT1vFiwpsWZX7cNykXBvzrbuE2+kofCNuj/yzl+i
PEnfLe/RfqSdOfRxKKT8KYelp5zn1JJvf+qtrlv0gslnXjthu4lJpR/MZbuju7BS
krnTXe9vibQEbIaG4ATx3HESqC6b70stKimabPdLKNbfrHLIG689OlZPKDAv4tbj
9U71rl0LPAkfIqpJe2ywet9y6fWGTe2SfenJ47nCiLpr3p8O9Y4YJ3ervRcizlIJ
YELhDtcZ6jzP9D/yL3lPnvTC56HrC3Z4cJ1YnJiszmVRIinSpOULFp4M7g+b5dXu
rGYMG3aXBptHBlaKMp7FHxQrNl7rzuumlSiTWJYslOwOOwib8Hi50/ylPSyhfy6g
nvq0fC++tyD9vutRrbnx+6Yvd3tXEgVlJp/XcR8O7dp8Mv083+9quZGT+2iyoE5w
1+8k88hkpzV6aVVxXzE+PVzQ1QvxeMuNwsZscWrPf/voz2va82XoeYaDmeWy8nK5
+rs17cVjjt/WtCyQRw9/XNN+e0yhAA7q/7ymlXQwcv/Pi9pnd+A1Y4fxBc6k3smM
qEqMtLFkrOIlQpmiC6sZ35DCJYF74FtJ1Yw0RI9GiEX/SKVMG4OKYWA2w1ZppVJJ
9toz7ILKEo9uxIye3ao9ge7OM8LTPS9zrxX+KR+AkF5bvNSrewChCC4D/BvtCmmJ
Ke+eTsAgCeE8h5bM+LCwID3S24thj3T906Nrn/k3914hG0o5NEKtsd9brd+l8hIm
Qu/iuaaDIRiZAANYRAUURlJGL8JkWEAtLCJvkSMEibyIxyImANyjASDRZN/NxH3i
j9AEnRfcihLtEPqE5GMKIUP/aG8iHn2nPA7o7OGgRe/Zdvv7xyQ1vd2wHPFvXlTa
77v47yZsVvkh1Ih6PWlFfUTQHIksFhJ9/QjGN1l6K7dVhBBuk09LA5rA2DN4pf9Z
A+L1IxEvHSpkcTd8gL/CSyYBRGOT4MambdJs4K6/Zls7spTfCNwsfqbvwy1YEwld
zAXHWZLAw+Dcvo+abFPYgL5kRgQU/OjYJa2qmTY4VqozhmIg2vsFDhxkmKhUJZzR
+PeooYEjSLM4D1avsxGvizJHzUtm8xul36DqihDzOCEpujH//iTAW+ZOHRPRQgce
IF+rjo2oMKBcea5fvIEw+CEJA6aMaDThoSw/yfvH2ygt/ocKNKHidaLElg3Q96Af
kcw2qxSxUcEa49Jq00o1VQoBHBr49hPgmzLgmYSJrvtBc38A6EbBENzUNkTXQUgh
D5RHMp/3o6Pq9q3cm+NazsayCIeNmH/gxMVKUEQQywJFXESsFbTbFoD6tafOe8vb
PfuQMLMOMFfshxKB3AAgxBFhg3FqJw/oqSMcQfdVwSNs93V7g23edtv8On2FcxMc
W0TZTqTV+wDafQe92ytRCbfLrwklN2fgRpCMz6fFVpOFpiAl4+AJH0bRVXFQpyjD
Es472FVZy61QdkfbnRC/7goqj9i77/WmxdgLv4WWeD0FlR8zsoUSXXsbbSyVvfpQ
lW0Bfxi3zZosJl+dOYX7tUNo9EaHypIuxsaH5YazqNeKo/j960wkdspz7iTmSGd2
b3yrqYap71CjU3FC3azzyXRSOQRWy1bBp/MSr4UQtcJjejYRYhzTPhCIYDb01+Kr
gl0gJRCgYvSp2Fbtktg9aEfDJRkO5Wp/vPEA9zEMwYcXQmnD15+nI29Hw2fTP+QT
/2jvG4aXXoNBP6cg5CldQGToUsjnDMW0MpjU3f66LXtCmuPZpJIlozROMXOU1OLA
YxRksnQJZSLY9tsGEg9UPIdIhgB30QvSvqZ8ne5HGaIfsnuhMMTAteWvqUhIHnGz
Uwy5F+pJybBICkXSwvM0i4DuCuJhedP9Nu6kNvsmzkmq7OjIg+wU/O6Te0Qf5tix
6dl86FQTsymd+faUvFpZ4UCrPqUWXhKUGv7Rq22KtxpTZpoymK3xGFA4YEyevGtN
nEGP5m4Mw2joCcjORLkrATTpa3ULS7lnCs+zEWxk4jyjiiUbmG0iJ3SKSIL+dCup
+dbXvWIBFkq3EJoki+O8d5+/mEZY4OchmvC0ztKYt/nHxgPYQ95CWwRhtmClujC/
IO9AdFQil1BHYLmRTN49I5gC2/fEiZS7hEUciuI9hZ7UmXJYfjynl1Ihft4k2lNi
wq/kMNKuaq0tngBX4hCcfIsz65P9WJIMD5XCPGG1uweTDhvP/QaUrJgMVVKjUngC
8OFewifFM1L5u6IDoB3IxVWUA5nS3wdWEELF3l7kHmNN1VL4shK4LmeBBug2mXcl
kct9SBmLHdYmtZMFIHdL74M+/FJghVY/hNZDyzl9rT5R+Ava9WuzwixPYE6uv5OT
MTKVfcuihEbTgF+CYX2Nt4FICR7/rZE9StmD/ml4e0Tda6nTDMdpOw8oDa+/gW3E
Dexl4skJWTKheEJuFsRtsv6EEdtf3PClJsvjQJChsVxgvGG6UfwIjzVtOXJBY11z
0sv+kWur+C7wKw2HLwVLKrj8Cqa1KzFsAxQbJu5xEEW0zpVuongJ6IclzBR86XRD
1Y/knM3dlHWjnAwXbAhCEKK6yeNPPSNUeRNKDDNa5OlNFWNmZWE1DHYxmBdQa02o
Wcm4wMkoNZVY0xg0ptBMU+j3tz/Fhr6Pn9dwIB6VSiO3i+KfBx6kieTiqqxSpWGi
gSjIH77yVVHIyxpQiVDpakCakHWXfqbibHj/o+FkTF7iQMBA/MDawMMB1YG7A0ED
JPjhOYql2Qc9WRa62gKFKeUBGoq80jUKK89qNZQ0mJTtNRA0pJSv08bRqFGv3uHK
tNebiX5XkpWU9Swr1ziO1OCl1L3Xs0TN2M20j2ofNcosywzJCMhsyiTKtMdx0LJT
papW5+7oammNyo2KcktoPX2j5l66RbKw/YH/g50am5q1OrSairopTYHabn6KSlX2
VopCrk7vyRL1jtchjcetE5QTqBN20diZtmmm/TDyMCuJ23M8c3n5WfnPaHScI6xe
WsUvYwzS5sNYPbLSsIKy0n3dbDVo1WlVMRA4wD6YOpA94DhwJ3/jTn3GZK5wf0kf
Qt/03TjL1SGu7E2l2B62YZSeecv7OVWS2ylmxdjq7dqh2fF56nlfw4dA4GUa6prl
WMhYwNjgWOvrGmeEW7S3IhTKu6xSG3n0eOycw51Gq6EnsKpRq4edDZbk+7aHb35W
/3xrYGXAs6B7AL2vu8+gwEfurA7K0vDudZOSt4ZBDdwP/aS1Y99QbFKoy/HwLVGK
fuwZYhqyz5yxbURrJLltkn39dkgvdjarBEwLT8tpS2ILQZgi7l6yRdJ+UrAcx5MU
NveOAbNXiaMdnR2lHcKqov1KqolLDP3tOY1mQ2aIZs/M4DvXk2kTa5Jzk+2Y7FiJ
y5hePjFSNr73dpZSVlzWVTZzgaLdpf2OxpCGtEZ7YYTWV60VLccXoYXomlOlmeP7
ox0VeS+ruBN5Rr0dhubXYovHZssZykXGrcZpXSpTC1LbbGsm2D0f1QbVjtS1nD5+
+AhmPPPtjK9oZHaEib9J3hxza64qXc5TOS3eZ94fPB8j0xLcn1jnseQK4I7nec11
MmO90uFY5FLHHS/A7rYckyevmi5fmkzxpNxkzAZHPgGPoV1vTPfUydkxvpqjcrdG
q/JZlY1jzULRAtFaXd/JG/hmk+rWG5EakZxpRWkHaUH8PnsOXz5sjW0MfrJZo/8y
OXfS09oRtFLanjuesJS8eBRvV5GeRzxc3LJh7uPoU+dTeHZ719SFoibtxInnbrXT
Ye9SMTQfDPa1FCQyaFFoWmhGeEtYclgbVI/r1tgpGF5AN6YmclOjtjwlGQu3z2M9
OoS30SJVW/FQHJF1MF04dMn5GLzu7ndjlGP0BT/G2w8rwVsx/xhaFoYpSRQKrZzy
/KvyXnZh9idJH2LR8JCIvIgD9iHqcrJyfgVWW9uPp5UJm/1zd1qn5Euko8jLyPMp
ciiGyOtkkOS0Ewb4HT90iLMykhOQhcYkq1hQh1C/phYtfWBmkzKYvByjnTbGPu7h
MrOK7IiyaNrNLXDHmcF1PZpNRltl7LTM9SOVLaqrBZH5ZLn7wzeASYrJm3WCPjD1
BtO3NSnd4tZj6xjAgRilibdEfY+iJjnh9WvB5Y/SQIFm6x1e8VjxrzlXRF1UdhsI
A1LKUsxeBnLJenEMc1Uw7SU1KagwLKVtcPvMHQtbVpZxoLcnpw7HFV87a1iNGm0T
SPiKuY+thvNGP6pyWirTI7OyJLut3EK8N3t2erYYJwbZHXlcRk72cfwOnTHj2Gtc
HT67e+M3tslBsh4JgXQTFXKWWkOviGW1nq3IGHg93tGSTVQe7XsVlB7kdT8jRZmB
vv71x7sHXYxtjGIGuvrMzs2PsTZo97FwaLXi1eM3NLY09I/7lto7De5rxtctb1kN
D/IOKQ0HDzsVftWpsUs9rJ51Rh/u1pyq9KvKNG4MDXfk1H+epPHaMbaPYjRnvRMj
Oblc01qrdGFCY2aoa3lpEL4Cz1bn5dqgy+nuCu+xK9sq25hW1fbanaxi2w2k0UFN
E3XV18nVNYZ7xZ439sp81k6d9cCzBWgt3bPZs2aveZ1X55PGnYop+7NlmH2oUb/T
w4HDginY+/0D0z0lKxldDR9Ep6NWe+bs+uvWeAjvV64FH0UHbtDVj7uobVuI3x7S
HOByk3N7UUNdtaTtqOmoE3qnvXfjVv3UuNWYtrfu0f7yTRnKDwpeXFpeDp/j5gfe
LoX1o48vlk/ws253dJYymzOmIwu6ngZNE3eVlY4rpu1xT3k0bItsi++FtjJU6Vut
2i9xHWa3R0oy1ujbvpl1ebaU3zr4+O7ksILuXs39Q4npcGJbB1v95bDVN0PxPc5H
GsuF6+PH496urzb4jvKmc2dqZGfI62brxk7y4QPRrU7ZDwzga/RqIvdgd52OCfe2
J4LeBCnef3+0oGc3WrxjUECUyJe/4rh+dw19vf7QbWhukjKGshFmoT7vrHwtr7N/
4/7eWa2J/aLhButSKbrPC6+iM6+NUEvGscCsIKI3He7cx/mzr09XvO0+TpXVy3sc
Wbg18I7VdPoonJYueO8feRI7CHjtc9LrfSH8SRx3uV/OysrBeVl5uZv6Yxx3Hrf9
EMf9ebcYss/u+Fc755DNcGdbJ0iAJ2tp6gjUAV7EfHo/7OKy/JmnqJGTkbWd+SXz
b1vh3z5/C2RkZmD7cRf4Mib93h6yGw5kVHU2hnzuFlzp4Ay6OAFR6uKkioywqoQW
7fnHYeXVLpqIgRxNHCztnewckFi+bbmLf/uPTMEKGpmcf6/1e42EpYOjk6iFkQOQ
lQUc1Bp9KzCDjct4x9LUyeJcX04uJIiA3/9YWVkvEhc3kJ0L0g+kBKY7T+zsHH+X
kC7zEE4XrZm+lTk4OM8TJ7h/SPqxT0g95Hh+DtwLuHwu1XkbZuZv9NxsEH6XtN//
fuuf6Xv+UlYmcBjPcs4LfARygTX5UeIL3SDtftON6UIKpgtu4PS7sfDnFwx+75iL
MuRT0z9xobWRueO5LyA0IueDkZ6Dgx1Iz8rCDmRhAvfFzMTEoYfEKA0eXpYmwrbm
1iBwf4zCjiaQl0S4mdghDx8uCvQszCyQgWgvBbI0t3ACcjJzgEeUE8hGA8jNDnmE
YQQZBODrB8io+Y2EnZn7gkQKCHYMo7CL+fkoALKxMUOGj9tF6VyOcwklLK1BLECW
ixc6frDBj69MXD4q+fa+ykWRGcjCxcYO0fM/PB2Je4NoiCk+xqmvPsG/1+uYnpho
GvOe2U8IQRIYs4hA1SYfBYy2f08veZ0xahoqmOpz0af86XB4FjIomFfIBS+K4JFr
qquXaV6Efnr0iiEUyXTxSL0T9t7Uic/GXnpi/v3qGvBf2lFertnBqwLzm8iWJDd6
zRiS6vyDFUuIOXyeVBm709XYfb2Zley2EMMd+uqoKMCfaqpDy20ifvSk57V/mCCr
6+6OFnhNhTYu4HgPWKNYUEKfUmPBPbapaEiTX8+gy8fqKmD69jRGvL+4kz/9GOvo
ZUEOY1I4vUAoSO0leWhyQqieA9aUrf4ra5ci/lS54APOl6rpbU8RUeu7bRHFC+rm
eVVEiSg83gXL0LSRicxXORApl3R301r3T0zZ8PF36m/bPfwMRxJ5UluJYt5GuxXT
ae7i1KUc0vBAL9uiW3Ga5+TtjgWLGLm5S0qVPpbkfsh2ep1nm1jeU/qZSKJRyvgY
Eyo5Ghv5RfE9qWYV/RXf50MkzeMpaTJHGbYqKK4vrjujfDWOu0V1pGzKIv9o+sUj
D3YZ5A9ocSdUkkpO/hmL5iZUocrlGYSivdLuKpXs2OrwWLJQugRvj8bIiQ+wyR+S
RlMtI8UxU/UrcWRaC/eGuBy3GccNgtkpZH0OpjjQ3lgPqDvStsNJLj9Apm1e31ld
H5B4Oe6iJerCa6XrwrsTY116OmrGX/AqqAa9yza0vVTHXBmEbDtp9kqDCHc+/o2b
NCNPHSw7CD4kVeUGuQ45unQmE6IeliTb+1GNJ88/vjKIQYx/Ivae7kYnYZRFwaAy
d1sTy6rOLJnyLipvNH+jQtkoYbwOXLhhehRER7JdxDofE5/bBaPMAovP74IVW5Xk
DtuifxRxq3GPqo64NDIk1VuMRslKOQeszWgk+Eyat782yGcB87YV2nAW0+6dAZqj
68VfSax4jwA98KsPO6B2Xe5OLX/gh5bSmPe1UEb7EuDg268z2nA6cGhCTUUDJfcw
Sz8GqU2oT5bGgn4Zby3quJB9O+vW6obNS1OnlQyi1VsxIkaf3/O6bfGSBbJgP0ME
IT5C66nxnSSnp0pWLs96qiQEeq4eh+sJs0Af5yqNjokKonvkd8uy2YRnZGaoafoz
kPEIxjN8n2k2aGSjeZd+N3+k7v19yvJiE4KGA86RgsJoKjzTFvcHd8HBmjWtvb5R
vQ2tkwTrQ0JrQQmmR9XQz7BBKB/Y4uSpeMrTscq6HvHci01oI7hOrjwkU4c5nttm
ApfVGWkVQgJ8i1t844QR2t9K1lr2gWWIJ/FbhuIbrpOowXdCdDigZ9VnD9l93eI1
K6GvF98oXYSZVTf+wCb0RiYsEQFBHd5zvvndrMUUM7KFdVSq3kPlarhsJ1SJJXzS
0rv7CccI97BB9Vb0tI3B/M/JZduz6D0t2wXGWNLK+SR0zPofE1i244+piOoUZdBL
j93IoccYy+p9nGAhiCKOPDjmU65TeGDZTlAG4rWxzKFHHFMR00GylA3bHeTRvL9C
Ps1jvdyUY3PdnOfxlEuvkBQxb3tr8OLDxW2Sm7vZAmExGJ74+M1Ir8JhMOroLWgL
OtddNwyq3HqaV7F095F6viBxPyKFES72DdNvkNdvWFsFj5mcTEIhyMjPEl2BftNK
oTyufCdjIEtOVCscPFoUnD7pOAVENz93x3ENjlDPKBLHa9wbod3Hnk7u3nrNx/6C
YjD0mbyRVWQPc7Sc/1dyfUbY0n4jeyellfWNQkEvO/IWYQkXynGxLd/gzqq1nCFi
8FDZOR1qku0VJvIgDmnL4NGWv1GGMH7/qdbqHoURjKC++LtVbmtancZY+8RadmWi
CVmb4/yJXuLG1myDQF7ct4zvGMWnQp3bytgPzQndbV13Ur/Y9A7T8qBwvWLsFX45
SnBTfs//SLyiniSpqCEEXiebc6tz/XP+ly+fH5RwMfN6zj4yW7Xc/bzfFPe5uXKq
50vY86Ewz/WIocDi4CFTna+Lw6sRu0I4MVolKKn0qKFBLbdnA796837WLdT1Kb7/
6n5YXWSdikFR97DkV/fDqEkbe3y1h52GzE9Q4B52AQme+OF+vJVooh1zl79CgUrw
FkLSDa23NGQoC8Zw7EYDb9sQYhykb4+2IT5cahvwSzSdD9Nc3vF3g2cPT45RmX1o
+YE7JiyFi2uQkfuVaDpe+nIyYWJfZK3XloLMhvXbXkydKeH3Te9vsTWiT+DLcAfJ
TYpSOX/0kAy2k7Wtzc7026+ltTp53eUXsWwkeiY7SIbGgSp/urN5Bktx8v7NQO1t
SjkF/uThqPx5IYpiI9NlnJvGqpQbmVO9sc6iez0+W/KN8/x9Qod6E273dfG5yjKN
TOFTycaicU8ox/yMS4R5YTBZ7SSNA6XKJx6OuohXEq0hHcCthUmokI1h4YVnpcq5
16R2BjiLumJniRAYhLGFcnTWjQTYTFKJJJOqWczZkNgFc9i56bglDwjdS7bHlSd9
3uMPJ63JhtifYUHqUafKltfGXrXmFTveFPvU2k6MQH+GY8hEz+ZFa8/iA7/j+oel
8JSxZTZCjR15zqVzzvKb1aNU8nnjdzq+5mqbNRnzmnN8ufkyLs4iidmRYUohPdUq
uJsoKQmPGH+cW0h3jzg3d6sfZlbUNSbP+SblRkp+J9EYjxCBEk66QFmmzf5Ifp2g
55DNp3R19t16vrt09VpYPkP29yZ8+AoYBflTBAsYfTQMTl/MjNlv0pFaeK3Op8Kx
VBohfGmtsOmwhq7lCNgigPMcJIe5tonWtjeFO4Z8F0TATEmg8nh/Og4roN+5QngC
blN1mvr+h8DG3Y/UZ+EwW6KeS+UfqbGCbm02kFUdLy8WhNTbTvasFuMRE2rfZ5cU
L1fYMjn7+pDCmdrmUMlWJ1IuXh43Mf8WJ2hLoZZIMjmQY1rzrMjEzFFPclFo19CV
cLWbQKbvIPBYE1XQjG0R/1RR+7r3O6OwLiJcfMbXyvQiCbGLcNRYeNzRwphyKQ+M
nvCAtvRHVHSl2TinryVbxnC4ToTXB/lK7yI03OV0jV+48ynjoyZdt414/yKZNIcr
qvTwWoxXiRh5i5X7jSz5UVloKuEFyxtRN2FPFRcd4xj3OfgZt68Jdles0iJUR+iS
mBKMKnyKXjMVdE9Ma1LnbSPqU6hEZIvjE9OIMYhxVrqraj/PwUJkcK3VRxom0cWN
IlLESEAGLXMNNC/xKsEtT3CbXEveNn6yRb3iBi018GGb5qsnH4UZO3Xlc2Kytzqf
MlbF6Yo/7nncMd+RmljDqhhF+Z5oaS9RwZhCmOXmlGiiXVy96alM9cwjzzaYeara
8cpQCzcZZG0BucfR8M8kEs0WTbsy4A/m8XeEKbLbSDx8ye/tjc47LufSPiOpbJ9L
VFsEagdI306UJSLztLTjSVmgVWXNZgkKxumuxHb19i2Lmdh3iTKIRX8uzp3oTuoY
AyvFXQW70a9wKoQutdTFvqQdlvxAmYZ8kKv0yXHgG4mIHq4Tep0XmnEy4qpF3W9E
Pz6lzJO0S2+JT+/dGA3fL3qsHx8EgrtJ0LLAIDA27zpvxyZF+xmXJyT+VfMqhiUe
83QI/2aq+KLRm43WCUE4vDUzbBdND937CgIF7bLE7SO+0bAHWO5Pjh9rb+Ywj8nZ
ZW301ZeSWOMfYR2JHT47DjumPHF68xXLFKPqIZ9kXa7CWGREdkJ/lRO5nuRGFnqP
6A7CyQNU45uj0LuFbHe0aU60icI2YKu06rS0Cj4WHZHyc3sznbTu7CV+6NBmQdsp
gautD+J7wDkuiha7t8kvI5CJxK5KUMecpLiyhLo/KbWREdlrs4M3FpFLmJnew5gZ
cyrfzWKhnWNCgiv4EfZRKaiEyec9kXHQJv+7OjNBGYE8IRmZ2mf4ecLaYfqFsRxz
NbKHyYRx6O14YY7PHIpfiY/m8OW+eZEyoLXDKdxa77y+2fWqK7KfrFbA266afSLt
gGATENRDZN9g1XO0tN8FX7dxrXkNaKeK3MIg1f5ZyINawgw/VTGh7y5zTEUP/FJs
1gZjjzfus73PFZ9L4wPE02tKJ62ZCB5uYFlz6CCZrNoOdU2CzMlqTR+vxkjSxAbK
hvdZW1Y5pToVx8VMxgjECEQryH760tlGwU2D04bITY2ekPv+TntkW3p7Oq1qPGe8
ojPFBOmEtl7QenqJFdxy63LrEsHX5J2arxu4SUKpxVF68+JK0wfo/BSF0ctP9eYV
hmTR3gYcwHx2x08kDzfOUCsPLzIvsOClVSsaRDWE+WzhoKJg+MIApDNiySGELy7Z
h2gqsJJYm9lFL4j8XOJ+QErU3szEqS+vQUFpD8FoBQ+yZUC4GirBkqsKOjd1rbRA
VIRK7THVgRKHMjF/Q9rjlgdI9+nR1ShivZZIth6UxRWR1mjeIskpDQzPmOvd0WoL
CCmLOQWCDOEi4bC+xp8q2FIgjxi0IX7Z9HAgTiXvJnGN0XciP0jhu1ZEpV7UF7/E
t+PMoTj5VrcslekA740eO/3TmFmKih6JJeGJilVvB3ZuuuS21r7tzydGuw/YwK4O
y3VsgCpo037FVhqomyv3+Ezs0/UQBVLxLWapiniVZymRa1ZS8XlRljUNE54k8HDS
2fZN6B+qMJ2U0RE3gXV7ogptGRnu05vtwOZToTHnm1rwidkjVE/RSNntclpjqRNz
22ASuefzOyaeEsw3VHfIfLxHcBBnTTr+uXCJoO1GZczGwwpG9cCXjR9K5DjL/Wq7
KUo8fSIMwlwwvsYWf/GGeoL3/I0YR9tGNOJTjlLmbXMlV0SyVRhTOJShObd2uy/+
oc9gnt7xYBtPxKOgbzgiIp9jUTTPGhBbNMOOYTYldlcpjlo6JLNPyfJ5dzQpZFa6
mbjQt7rDF9ZIEfYgsLcaf+sTh43USZOw9trbUCu4neL14QpX9eIPafw01a60io/j
H2NSPkKau3bw/wENQPK/sWgkLxwKBvw+r8ftcjpUu81qMZuMBr1OkSVGSXldfFhT
LJVoSsmJ+MUXd+P78ek4MP2CA02pGA4N+3mbVIxfNx2nftZSQ8sr/6Ollm2pnW9J
1VgNqelWHquLx1KHhsZjHXTKuMmA7xgab4ilTgh4lIA3C9gKOD8fF8Tq/HOHxlK0
KVaXGrZi7oa6pqHdyulOs2lIfMhsU7dystNkBmgGlPLFl+ykvoFUAMxX138nIwYr
XjEVjA+tSwXiuBS3kYrqps9KjR03uW5oKD+/oVt5ig6ZGZ+RItxSSoomZIh4TEo3
JKUXj4nNg42TIrfHdpYf2LCxQyUzmpKWWfFZ06dOTknTcY+6lCOJ5w5N+a4/7v9p
FzeHTbbuwrMhaUOdf16MN96wYV0stXXc5AuuDeXzOzQ04B64lhUNa9owDI/eCEyN
5LZ4it3aMDlFb8UjYVgWibfKvl/W6i1qmh9LGeOD43M3zG8CaoIbUmT8dfmtwaC2
J3OMBOtiGyZOjuenakPxhulDwzvdZMP469oCWizw8zPdyneqjuzA7rTZc4DFeiEw
G4OePScg0ZxDI8efH1nK+xi/BJZgKjYzhp5MjuOd+vFqdj+yYWY/IACfBoqrUrOA
kXkp45CmDWp/fhyvSFNKkRqPbfg3AQXET3z98yPTc0d0Req/CT/J6eQ8qaXo9C44
lUymyso4ieiHAKfo40Cx37tb+YoOFo8vUeE/c6eBjMXYTm/oX4Hhz8/nCL69QyMz
sJNqGTc5ux8jM0KtRKuAbc2a+JkDXWc89fxMS9eZ85c3xUHJ7dyfJZ6UIXH+Z1e9
rrq5/VPU+385PTt7fuSE+EiYxrG6DU05qh058Wd72fN8QDFuOJeDUq4hk6UQwzEO
sZAkzmYt5K4mMJcnW1JyEX46QdSzOvQGUKU4QmPDUmrTxdm6wZSfn+OZ/+2ijsxJ
fpXY/HRZ7jVS/ZO5jma7nRrws/2fdc+yQRo5ESKHwbLfsMH0s3MgtWwvL8ltQPFw
9PNjQ1KkHpxZhB9cjn68NIRSGoYMZyaCi8ThhlBu92cNQ7mLGvDh1NmtfBhk5oYN
w+KxYRuaNkzvyLTMiMfU+IY97GX28oYldZB2WcLpyOy9PZQatrEBIzaX9gd7MDJ4
Z5yuH7dTo+snTJm8ByGO2PqJk1sZZUOaBjdwtLAhEyfnhkUghJM+cIgZE1AM1/Hs
WbKSFymPaPLzZBngQTi+l5+Tm0k9ylGUGpRJKEEUfmwUynQU2I/Yf54swXaKMinT
qUwi9yqvkStRHsnBD+mqyUzAfH+q/HfSA+ce1d8BH2YS0eG6EShr4TWOxXYYykg8
24XtYPoaWY9ysw62BPZ5Gcq36OOtaF+LdoXYvxlwEPfkgZ58lBKwAhUMQTB7pCMH
sB8jl+eOYCf3YfAVZNj4fDD0sMeNxAS/xAJfxkbsmI9xEKdo6RK1G7UHXoQPlsKF
n4DYCZIQbE/+yeOhY2xjKPkoF34KSJwUkiJY9MWil6XiZBlJwhfoRrpjr4L0gE9Q
SXqRKuz1Jn1yl3vw7HpYFH7Yr4thb/+OPS455ITiUl7RbdXfrv+bMWmqM601Zczv
WLZaL7L+zXbO/kd1gfqNc4jzQVe5e6Qn4l3nW+EfGygLGoNtoefCReHH816KPBJd
DW18vKAjPqIwUFRS3FhyW+kqRMbwWIUPjYSRIfmOfEcRKkTRyLmYdOCcppCzJCYf
4OO8Mj2ONSlvY7wu0kzFdkxNOPUGVe2gvdrIFpsBW82h32K7gkiqFJMk6XnHwxv9
SfV0Y+fpE+rpE6S2pramZw/aSBPMUdW3T99eOj2+HpXSo/f8YdSUfWuuK74onqTJ
9Lh99Adq++aDzrNHGjbc+9Kv09F07GfPn61ZSliJyowmlRKnkffAtEWi2LZj7ugK
G6RFu6qyegA/tNvtAjjebrUK4GvNbjKxerstamO25525PnIv/D/66YoTR1VxAt9e
XthBKutcQ5PJgouKr1+zb8qow+lx9Bj92749926Y8qeznR98k/4ubUAvNWkm+zNG
yU/WaiPM1GwK0ZBJNhktNrvq0OvMlPm5TaUnsmTwOa16WFTcyhJGFmwst6yXDNSk
U8yEqDE3de/XKcT8pK6D3qNZlSeJ5nBVkUBgCUZ2tHoqOepU53EMbGdjTXVFjdNX
jR91ZLd807MHaXT19frwCjp9n74+nd7r0yeKdfriPn0TWvctF7voXZJ7zq3dV19/
0eJr+48Z0W/F8so18vY7+5XuGjrznqryO8tsvdfXj1l/x4j6Td3BABT28wm5v7wb
/NNPi5KrjOxHg3SVotcZr8Jb/qjQq2rhRDEWsFw2RXSxcdSpmhM16vGaGlJxqqaz
5lTPHkWO/N75jl6OfE++g9H0UrrpWbopvfQEvXsb325LX4XnDKIdbD5bBLos1wJL
2BKJjaKjGKNxwoLKEjQIyEvu4E843qh+RipGncC7LqWNrt75nkGslHbs2sV7uxfV
OkQSJFKk+VkNMbGaaXDxV8NVlLfi/Fb50fsFjTaCPnGLXr17efYeOnSIX4sYC6sG
JiUyYQ+RMh+3uqtZR+ZjLeauvk+iTNoi7cAk3wpCITAoGEkiJukLwr4AHT6Dh8tt
1+PONeqpE2qW9tcp3ZONq9SDnAeSSQ/tRekzm9OTA8rXZ3AHRuozn8sO5QD4K4/W
72RcoGumYERW3BGr1WfsyHwhaJkDWoATs9FBLJy6iddiQW3hx0gFCPkQqkN4H/5G
oZ26/3mnU7iTrh53+gxcIYBvtIDZDMhBVH6EqBYLr/mx87f86Z7tulhADYPNWlnM
/BsYhF4UJ4odIfkZsm4dW29eb3/dphj1Zj+rc13qGREYEpromuqZGhgfWqBfYJ7p
WuhZEGgKXceu0a0wX29fp7tff6/6uv8D9q7uXfOH9uD5F282avnxqh5GSoyqkRk3
Rx3NBIpYs+FoDG4NI5sjr90ukJiEnGlcmuSo5K9OG5ciQNSPfyhKQ4NLdfbpVen1
OsHMunhBccKlentV9nGoiXiBXle/4O2tK1qXD57/9qPvXHfXnmdWrnzmmRtXjmhk
b1OZXvT8tLZ05oN0Ov3K9vtfpA+n7/v2JKIu87+Zt5bTylEg8CxwZyI7tJikWR1V
C+TVbBN7wCA/L1Mj0SlMMirUwugbJtF7E38nQmO4FtMYQloB+EpzCISGBUJtAqEY
ZS3A0dWFE4GfoEXRrPYqpWskeig0hkgVUwLmvbSG3kqyrLE0CQGcizBiZGpGddaQ
2louJCAbaCNpTObHHTqdvncfyGN2tn3Q2xPv+6RiuXzDwJXRF4a/MY2/Ww1oWY93
i9DXcrRkdKhWv8ulq7d2ZE61OxwC+EYzqiqgiFuJcBL18QaRCD8bCdtwJgICRd3B
XtIszOTzISvAwVgs6nBWV7xziNeHSMUJ3tlaXh+EWxrKsQF/oMXpZOKBmtHuAJR9
zjHN7HSx+oibH+P3bsWtOauYzawewNeaGMX/9jTOI/x5/GniYVqfAcoA3UvKft1L
+tcMr4f1l1gaLBNtCyyzbNc7r3fd5tzn/DT4aehk0LLf/KKLhTDJl6dGVN1vEFbU
g/gN2BqBrWDEpBp0ujfCQXc4HDSEg5AWhmBYskbUDvZE2xgHxRSgfxd/AyKGw06Z
xdTsexujzWmdvsTWkBhRaT/N4thVi/DfYraayWwvK8RE36adWWKHXDmd5OKFy/+a
2hOdjce5yBfif52te9IGUYMdrgO6OKAfaaSNyxoaijz5ib7AeJ8+vatA+lwdcL7w
uEEJ+Mn6c32Zr+jxB7/d9sANNz1E97h++OPbpy9++uXHpka2bx9UM/PAjQc/vXLB
Lx7a4Dr8/lfbJz+774n103uCUiZlPpO9oJQkbcghzhzwa5yK/WFCOakmLdihpXGT
1W6xR0ymUk8kLEdKw0qpNW61+ANQ5zGIHlYf0yc4FnnzRAUXaIcq+Jc4q2trVUhU
UMuJV9VXndXqwWQlLyAWrUSxeq111rVWuc5xmWNFSBrvXajOd8/yXm29zr3WusF9
W+hJq0mJSXzm0Gy2WG2ynuK5UDVPtGl4gZcQmCklVtq73WLxyP697AkSYHO1YvRS
QTetzuZpscUxFvNzSo616JsTQjYlKEmoCYYen3qRn0ls7ubvoP1aA2/TvbQfFMkB
zfyTtCrvoHfncJg8IbDIZdappFBBwCPQiJdTBT6z6ASrQoSBW+nSBqhzLrME4vR9
z4NdOORI1HtRk3hBYlJ79J4Fq3c8tqrXpW6nublj7fx5G93t+V+9cO0bC66cddPm
9Bfv/jZDb/Y/sC5108pH3Y+wa1fNvOmWW2K7XpvTOmvaQ90jv77zQPrfn0HEBiED
VGUv5JuVJrQ+zsmWuZYHLc9YXrcol0qXWn8pS07QOLHoJL1iMkt6YgGzvyHJbkmS
JSthFivsmpeQGGGAyblVMxFZRhPyhknuYFe+qCgmLS9aZeqShAC4YmL1AL4RGsrU
QftqVr1WEK/St+T31m+2QxVjVK3uKsJUFmMS9o+JawAc382xwHbZOuhGMdJfJ5ON
QhCe4uKlRv1MFXJQPVVzusZRzQe5unpd96QMlrHb7RhuMS9khc53VkPGvaOZe1VL
Bd2qJTkvr4bfogHIQBvNbdHM1ZaWsdUWLVFtKQhj262aN0g2wIzuTXs5enniDslB
2b2dt7CHf/Hqq+3p3nTak9LucyOeTD8Kpr6ncwEIj+v+fOUpyNhJWc7BfDLez8oH
gYZtpojHE3ZyyWm2y3IkbLVRovdDXwiLQACCy7je51zC9R+IqPMgOIMzRqlTyF67
qEcGr8vbkHev62nXK5Z3LR+GDEaX31YWlIw9lB7mvZBjErhDdZk8TpfrDZvdbXO5
bXYrWERz8Y5otq0wnG12zUNznXrRLtO3OftAqmkx3j3HNHWxulrdpMoqmMQvmMRP
iV/1M3Q2yyT+zTHnPtobuVP3gKj6tdp2/TdmQUrDhczyE7s0QpFxmSdetNFRXdEI
sXB8naF7UgEWiRB8XOv3o0thbf2MbcArLtieEmQe8bj1sAQS9b/2PLDwpvbtGy/b
WPLMnez9zhfH3HLXAWpYfsep33fSFnXD7Qcfe7B1TK2X/fP59Iqp6dN/fO2u1mPc
ahsFzHkg8/JIGR2Tk3pRO41i6kGioZKIZqVWK1RiSCmIuK2mCCVFKoYga8GpEZ/K
Fb5PyDwf0AM4Z8EdeueQ+rsuTDaeUA82ckx2WxCgQ/WaZ2hgaGyKc2JsgTRLP8sw
3zkrttxwdfhWw9rwu4Z3vA59jHNAcZYndPVxIfD4oXxxQs9PFMfisXx+wsF7OdbK
0M8QfXsaRySEnrGrz7Bn+2lOsquoWRWIhM+lwrvCW5x8kVuJ6uZyExdzEVqteWt9
03yLfat9sg9Gqa7e5+UP9XWwwrZk1kgDJ57gmkvIvKyllpV0FY3cZOMY4+zDpV0D
ha8iTDM4L0CWkyuoeAFxqH2x56XunyShTjrb5i+/ZMGkQfUz2KB9c9o7rzlyy9/S
xx++7YvtH3X2HXPn6GVPPHbD9c/KE2zze4zqMfCbv85sSn//pw0nbsR0yUr6zG+3
vXzuo8ZnGzoeuX/HDgzAdMg7L2ZdrWSJZjtopTJ+zCAbIcs4F/ZgVDZarM2SxPiQ
jBEqWmJBu6HZ+A8yBrifxqRabBbT1TAeAxBEgorhsjUurRl16sRo9TS3xrhnwLV3
tUPIILz/UuHB6Iik08f7OJ19p0u7NqZPjOxj3yPd9K/b5DPbN96TdqbPdny4nX5F
X3uI++0TQIEBUKAPMYcejGRpsN1CQpHuXEbCDmP13bs78yM6pSTitEaMFq5gYfyf
gpgEkLRzf5mTIYCs4cQBcdLuh67MOtMC4K0A5MhXKvRYuJ3lEXf0CPL15Mg364Vc
4IpAHiVPVMMcyXkkL4qOCOeDdwQA78hx4ZlwQBzLPZ+bv3jsOa2AN+SP5cTFH8hr
/qY/vV8Xy+BZVMjDbE+ET8Q5qG9vLy31XuK9JPGZ5cseirEHJrRW0ZXycsNS8zLL
1dbrfbeTDXSjvNawxnyLZa31Dt9bjlddzgJwSms4FuSbWKyCb7rFoPGPaZHSmIVE
/MSCbmztTn/qSaR5v5EaO9gcTU0227UYLH5ETeyqndk76F27K/3NKYlKON9a2Ozp
MuRjHs3DPJt7nndpToH3QTWwEHIGgrO6sYK/HFdaOY4Rcq5x2VKytKGBJhK9qzh/
XGAJEBxxub1ddoNOupB16PwlCz/bf+CrBYvW3ZE+/f776dN3zVi7YO6tt105Z33/
SzZPWLNt+02rn5ZCpffP3/rB0a1X3ldafnD9vgyh9MCm39KJc2+5edrMdbecy4za
POaplpue3dbly3KajEAqvpD1Gl40R6ECihxQAKcFkrkmEModwEmthGPU7xAodQjv
0+F3lCfNJREeqRljk2w2NxlLqTAjrSq8Cso1DYSqIjB+MNlYCRJrPFEpBgaY54So
cin60e840QmH+oJO/KQ7tTKhPB2Civ8/nvrzZ/3Ho/Cknx6kVfUPXurV4pd7L4tf
KS30LgrOiV8fXBXZGLw98qD3meC+4Ffez2KnY66LvI94t3ul/qWzdKyY6904iMmf
H9PFSiJjbNO4kg3z16Nvj82K5HbeCST3VRMzJLLj52p1czmX0+1cTDvO05JDczDH
5pzkbcxam5yUuNw9rzu7xC5pRPwETrIwMAey3lXFXNpiS0BMmAPkLnOCCofBI2hp
yXbvyukTVo3tQ/u8tGj3Oap/ddOJG67/52PPf8DefHL5ta3PrFz1KJ2gXn/Vpav/
ssTin7SAGv5ylKoPpv+OWNnn6bYX9ktVv9p98KGNELl4wyXkE3kA5qmRmaJZNkkt
cJkVnWRgyktsCg5KbEor03R76ViYkGM1D3mOPheTWdAg1wg3+mo9jzghAFDDpSsJ
VARHncDHH+TuAmgiFw3rTT2UepZIb55LS4yt2UYfbEM2xG/bONVOgdS3IOITwQzs
LVoFMBZiK4MrQ2xGcHaILbBMt7EpcAhZH9tQGwsFDHqZqMUOB7GWumkEimGHFs8v
yK+JmqI1BQWxmvz8CLkicpXpCt/8QvWKGNy++fFcH3lAFLZMjYrQWCeQUaOehgsH
+j3u4P2kjfiQRoRKe/NIKUcG9GDOxpc5Y9uYXkKsiv6FRrw9C1/q98Q1zQ/69wS+
f/M9SqbcPLlPkHUcovMKnfNH9R+QfHJG/3lbNj/gPfTBV081PbZ89Iimhen7EORi
yM8hSgPsej2x0Tm7KWKUrB4G9HftOeAHwaA4ckpr4AzKdYeuXhF1hdpDnWOYa2xS
10ub1deVV3UH1JOq2aA0IPllrDrXnFL/ZfmX9V82o2yRrbJNwgSyIsvwugw6vd4C
2IAsD8TZEKXV7CLiEdNb3DjFJAj7HzRIeWibmGxx4ypjRFEMEZ2k62BLNCPWQnyp
YfaD7aVmCCKz5rTEyGy9NH4skkmOytJmmcrILtXMYy0H9Ect0mYLtfB91a4/rGer
9S16pv+F/d33QDCQrQEU/PwglGBABXf4a2uCJ2qPC/Sc4HG7JGzKdd2RqJlzqqGw
q9epBw/aDh5cp2S3wNrIlBm5ZxFMsLXLdsmg34uAAMn8wKVzA13G7VD+iSPyF5fy
JVe+xEOxEuv1Rzb5o+c6f/Xo+/SfDwwrCPdS9p4ZRvelh7Ip9N4919xxO9fy94I2
vwSmHMLSdO0hMnAynMfnZHlYfFL8yniz8Rajbl7wamWJsdl8s3KzWVfsNUr+4rKI
N89odDkjZWWlpSScF8G4RRGYIQZ/QmfhcXId/C2tF9ftOicXhTodH3mdgd8dIDCu
c3NVq5tYlLCE+RUWE29n4XTh4a0swfK8SEzwYYyfB065kM8BvC2OnIFXfR5APIuL
fdwHUGNywFTOu9kBaoRFBBbGzii4xdlPLsqBM2AS8Azi3Y5qaEAq+FpEshBQRmyv
S+vZWJzmV2ZDHIk4nLHKLBsBvpcltr3ZfOWcWzdd1vLbjelf0IvW9BsxcthNj6Q/
pIuuSAyZ0n/iPRvT25W9DXtmX/FUr+J9LXN2NvWUxju8V466ZHHp2a16S78Fw8Zf
hxQbSq7MfK6sgMzII2/vmsnm5zEoKG5Eiff7QpvGoRiptM6EfFue10JuydtMHlSe
k5607pHara9Zj5Djef/Kc9iceY68PKlMV+IoC8eiw62T3Jd5JgXmKgvybnDe7nxQ
esD2YHgbfYJtc/zZ5kKmSlB1q0EZnPlxa0m1UIrdSqpVO6FyyBWxSKGIbFQT9hEk
EYPODEZ9iZiBGmCt6eoNgchMjDafPmgcxWUlah5Fgs+YFT4w0XnkFEb4MurTyfGC
QsgfZ2GvShmTB1wOMY/byY0Juf3li9KvfHoi/d6vdtAhL/+Vlg/Y3+vlXzzz96mL
Plv7+CeM9fz27G/pVX/6FPHsY29223r3Y+lv73op/eWGfVzaPgLZMwUUbcfYfapV
xKJ0iCFLnQ41YicGdNlIoyJ8ZBREZTRxijIi+JI1X7mAgEgKRvPU/2fS+x40KFDz
QxfpRf6T9HJkyK0tHlhD6dljyHVaHymkR+65guxzWRfwB/1MZzaBD0ySzuN1e11e
SReSfPnUaUPlN4TzqdfkyEduKCaNyvBZQxs5hfowlwRHhoE+i/IrczG4YlDlI/TH
56bc2LC8efT1dx26Nb2TVt/1ZM+6UfctHL09/Zay15N36Yz04YNPp9PPTK/c3qdn
3ZdPffZ9GV+VBcmgjMc4mmlai0gFfasNxv7Fpt66PqbhpsuktdJ7kn6F6X3pfXSU
86sYvhJlo7xBeVb+yqCYZNpbfldmcAiOaUZnfpUU4xUIq81Sjcm1zLE27BtyW5lv
8/KrsD3Q5vTy4x9rFwXwzKKiiwzGQOAiBBCNyBQyKZIsxxSTG8Edo8EQ0+sg2XUm
E9bTyJTpzUjuM0nMjJnGDtZfsyN+vVVJKQeUY4qsjDDwY+YeehqDpE7pJX0HW6tZ
zLEYXvf/j3z5rgvJlgHbuKjPyRfYPkthTi/lCrgGE1O1qHiBaOHCnkdOsfWLeBCm
OGsMNRDtfoj2EEQ7l7x/6deQNWr5zsk2i4OP10nNB0Cn2hxVBtWmVhk5ZFKtalUu
QbgBKiInznjsyGEswLiVB6plXgpC1Qjmf7zbC9BbDUx9jMh2taHAXS1r7mo+zLuK
AHqy0aXsbZCSDPJauqwxSbhyQbDJQfMpfnrHvS+zv1B95wPspgzpPH1S2dtZyt7r
fOHc/eyzr9JI+EYeMFGioBojXbXTaeYWo8nlqTL4LV7h4X2h5XPIAFUc0xuAOgMM
DslglBkz6g2yFNPp0N2vhYwH8B1CceBKxcklPPa/14Jc1CiNMTONmceam8xLzC1m
xWwwxviEByJbeNj/gk3NLNSFnJOl/5NzTQMaflIaCPCBU1Uocj42XEMArbVAKRwl
6Gq5e3LdqoNdSEOE60XgyhBDhTEEYjibAintBm1YNXB5YPewaoNWmQUrq/XAFBe1
uwMAK7MgPxrPzgia49V6mxvFxfdP7XYBzMuCeQA9HPxh53nU5YhAUEUDkEaBtzh1
PPSaxPa+di6t7D27Rl59ZpjccraFy8mZ0DAfKe8gVyFE3tDGBu3UrbrdIV8oJMuq
7Db7zCH5Gd9u26s2yefzh1gsT3OMcY3xacHJymTjZWq9Y5prim+af1LwstDtvgeY
GohIkjNiNnoSMT1FKOgLMf0EgMdaWT2Ak0JTA/hKaDIAWU8NwBkQBiSoPtiSR/Ps
CY5DncAQDAUI1kC4S7dklUtjl04fldUw3LaFboGCcakkv1LmolBomL4q3AxMuDMo
GDKTrqd93qTDnmtP795/OL132+9p3nsf0tB1X971h/R77A26iD78cvrJvx5Nb931
ezrlN+nv04dpFQ21UfMv0p9mdYvcCeq2Yh6+VSuf7VjgZiPVke7L1cvdstkCn9JG
fH5uCRGDM2EQ1oxBzHaC005pIf4uhmAsSPEL+q3/q3rJ0arQrzlLR2iZ8wZO4EIt
k8xaOEvF4PCB4UqG2zVc1XBbRiiKCNQsy893QGnwcL/QEaz07lEL7274Jv16ej29
Yd8jjZf2vCV9m7LX5py9e9FL6c7O5yW6cfXUmz1WbptMRWToH7BNejCPVjxTmik3
S8tluai4t1QdHiJdor80ry46tHBY8QSpQT8177KS21y2ODf+uQVX2AUUdQEIdmRP
FXcBaHy63ZptnAXQOAugcRZA49PaMN6oxJooZIVScVEfO9a1FNVVTIlNitcXLTTP
ty6wXeme7b/OfL31evsq9erC5qK10gbzbdYN9jvUWwtvLrrbeq/9Xk8ky75at/yE
M5QIGhOlNEFIadApV/ZMYIEAI9Zu14VuC7FQkdfaLVJcRIsUL4TRKS3rtUS6GSMR
ryQsnSRsx0aU3KZROIgVJ7JfhFmLCm1Ws5IPeySEpFfkvOpoUWEBjukQFu0WxB1Z
/SbQxgmsNhDWl5B8Ko3RsUgeXEI3Ux388ZTm6sYfqeDR6PEIY4KU0lLOVjYbqwdw
SrPyO5UGK/FONOHkIpWfAoDhAzMCyDlHCPYCpYGeMy/P5VUch5yDxyIs5Z9MOMwb
JY/z6hR3eWHQ4Q2FlQwhBw+fC8fsB3zo6hthMOOy1FVYLAJHPHLEk0S4nedx+7wI
5HKbWgcrMDH1Reu0369a/OyEsVMHpBeOmzfnxu9++fiPa5W99u3PpB6t7kffn9xy
/dqzD7+W/tcD9D31qjsuG9w8tG5O3Dc92ffx2Yt/O2veW2tst9+55vIxvXotKBmw
a8XVh5uXf8kptQe8m73gVz3yk60Ki2DAiUg2RvisuS2W9eZe1MUoq+AhM0p3UeFs
QHhpZuFwGHLexnddTsYnYvzAjOe6TL40jnCuxB0Nux/4SXU0YhYVpfN442fcIMiy
Y88efAJHpKi40nnyhnRIsW7ffuZfvLePQiIXoLdu8r5mStgny5MNrxtkL9drXui1
KnmAYZg8wrDC/pTyhV1vIcyBoHG7zuhOQBFkdSaAnM5kIvaP/WNamAtS1hjz0ph3
rJc1eZd4W7D83JqImSimwrIq2iQMIOxmHSwBcEoBcCYrhkxCZWI/qzIB5IxdU6OH
q0xu+ec+jSdGqZDFQkhnJbSQQElMNfZy5CRzb6inbLzQITe9PCt99p0/pM8seXn4
9lXv7lb2ntv5Ufrc43dS65fSmHOt+3fNeFnkw2CNBtGvwBj56YdaopQkHKXOhL+a
9HFUO/v4LyHDHZc4h/snk8sck52X+dX7DffbWY69e6k0GEh6qpQqy1BlqGWkZ6Iy
0XK5Z5Yyy7LAs1xZbrnBY1c8FolQJ4xIOzNwKV7LP5ziOSdXV4dgCcuKwnR6Ayxc
GBJGq81utyCX3enx+vx+hFtr2rDoJ8a3FqeDb7UpHpgnsE9ZDEtKKaarFIMh4vG7
PR6/02I0RjxOgE4Hcm5iqsOtqg6n0WLwexQ74pWEoUuK5Md0jhHmLhKVmN/pRGzI
EPT5guogIx1HYsSC2oOiEYWO2x3jrlkg0EFv3wnrlM8NBAOjOoP+zs5goNM/um72
0M9gw3CSzNYcwhtSvB9/R1Fg2owSpg2PTsDC+fkGWF5nQ3gCVQ2vBHRhBbvWDrvW
Abu21WnioVkeqhiZKsLBMmHsYvK6H19+xyMbNhxps2iKxpNpoKmWNebTXi6vr09f
bJzYuBDZoDyoQekj6RteO1oY7Id1JF/9aUw83O2zV9JXvZR+s1jvc6dfB93U3nfP
PwqljzuD6a//dXu79AIMnsaNsdnDzz4ODtPBOh0G6rHQ+bvhzkjyADgin7c5fdzh
+FyzAZADqCRe4dRf2vzCR/mLNgCAXILKmZBLDWWmCps8l87VzTV/rJOxdkHSGfRG
nc6ok4wmC5SSMWYyu00mMwJLRth9pzUvPyrFGHUDhzqLWYd/ciDU3MECmtFkMiJm
SAy2DubXjBbjeM3UYmKYm96lWZFOECPS+DFI+mGMHzGCgkAk2RAI5m15METMkEAk
fZITUsy/22p7Ob8J6E8KHuSSCFP/2Q2wz70SzFJzwgbaMUWdNMA5UUQoikPreABK
RTUy5QOCwkBQu8FitMh7M6cwj3tKzKcJyU/FfLVR+BywZuG/fbwzwJ2JnxbN5jsQ
mcpikzrYgM43v6b5Y+sGX0HDn3S+yBZJo9LDVq5s3kx3nGvr/AW3TEdkvpDD8kBk
uPZl3bRyo9VYFrAGy0qtZWXV1j6evqH+ZZeUNVoby+Zb55U19dhgXVv6oPdXwWes
npKuIAnMA2Szcbn3VODZkt2Bl0oOBg6X/MnzUYlhqJcikeiUhri8rt4J/doVeOzN
ZWU934/6ov5keVlVtVxdfol8cfkkQ0PySsO85ArLOqQm/Gj9MenoW2WjslpRWOWr
zHf7p5UuLmWl4QpbrW2TbYstY1O22HbYvsXsgsikQ8LoV8L6AYDIFs9nsokZCZuO
T0EhIC9hLvPZ3f57kNmjByJPaUHeD1JXbKoMS+bS6ep0ouPSmBTlw4L6usuU+jrr
HxXKXNvjxHGRnwTglDCwAfyV6zFdfaF4EPazWquwg12u2Yo1nl8SS/RI7Ego1VAE
wkaAifXubm4sJHryY5o1ggmm6gPVbGs1rUbq0yltEL+jr8hfUFG4X3dYx6K6Wh3T
QRAiuCdIUefn/QGVYxKP1wjxIV0KtZiA0fXs1xWSw3QtYkRJuFecThvPh+XgcyU/
/ZRbVMeRR5VNXRGqBe2XQkBxGXU+9s5PiNl4srSIGxR8ngoBEP7FZAM3OPTFA2GQ
wP7wejDF4IsnMA1qgxnMg01oJNXM2jN/x77hzRf3XvDBHNqrbv3q6/JS/quO3Lb+
2bGq0VewL+ybcXDx1MpF8+Y+lsi7uX7Yc7eOXjPabbMGC4tMV3W7qGGpf+ntI7Xp
I7pfe/LsrRf1ox+VhNWSURUXN10+5qJrQNFrQdHcK+Y5mC3ar6hisRcqvZU6RamN
pqIsGkV0Njw4vCS6Oarr76rx1mCq59Jgo6HROtne6L0iON+w0DrXfpX3quCB6PuW
D3wfBD5xfe37OvD3vGPRTDQQUyrsFe4eSq1dUy61j1WuVD7I+7d8RrWoHpusYyQU
hug0ecI2s7/wiJmqZg2ec4tZzkbBzIJGzSKAA4/9tBAiAE4KGgKQTesEcEyYPPyI
VsHxaV4OHxNzG0A2kYUR1EsqYuwAhZ26laboSSpHaS1WrSKJOpMWRAvgnJbHyYsK
UqHCTKFOTipUkApa/ICmmIjjTb2cQSjoCbWbP4IGIsP7/szYAOEsXYZJ706YHzBR
BZ2gAqlwAsJPRHS5mQrbdBlZitTEXg7Yo3CEVKQzFUswR89PYdJuT7cv2zljx1It
/d2v9y1gVfV3rXj+yatXPI9Qx783jdn0RnP62/S7D9N799fffujNI68eglYZm/lC
OgF5FaRTcpkaVbbVdmo3Uw0rmpcgyi47w2a9Pyxj5atHb+Bvrxdvr4cHARgeImo+
sZg89M6rwpFAXgbyzxpF/tlwo4VGw0NcQ3wTXBN8Ta4m36/Yr6QHrU+oTwQtBmvA
NJ/Nk+YrV1uWWFusT1l2GXebdlksXstay9+ZZCuYZl9sX22X7EhHe1a7rgeshLGk
Cd3aTLaSYwS5hcRuR1r4+T6G0fVCm4EPtq0ghPcrNCej0DqwKpDdBgxoAjsXC5wE
BU4uCXsKD+tpVF+LCRAbb6Q38UZ6IV71PUNVB3N2MY+OCZXUuCy3rESkJPVrOLHs
VPLEMvHucFmReKM2HsdPeBfAWwNCxuBtePIi1/a8J8ExJ9XszPv2hQ/S3y/78rbt
f43uCKyesv7ZJ26Zfye91ffiYZpHTc9TtmbHo6EFC195+92Xb+I6ZhhwdhQciXkP
Wq89YWKytchaZR1qVXq7e4cvYxNN490TwnPYLGW2caa7KXwg+o7yZ9dHgU9dn7q/
9f0j8KngPG80mgxydh0Z5Lyr784Krd29/Vlv60hWZx3mviR8mWmSdY71U93n3jP0
lE2lHslmRjg9BHpwELCkZPb34tPX9iJVPeKgKqZWmxwtDrAmp4ksgzqcXN9j+hVK
iwtZh45TkEMwLI7C4Ocj7rDxEcf+N4JLAfygDebYcSx3Fu7H/NRRfUYvcxSNQeQz
IkhOyGk98sA5QQq0CbWkF9pHH4hUjb2A0xqXjjpxnrs4f2EeCzYFFgqcQEgM5Sc+
W9oINuvNZTGEcRZh4Dlk1pznM6nf7IOr/3z1/Hdubrq3oq0z9vzVK57cdsO1j659
ZOPZx7dQacO4Qcx2ZhhzvvXGb1/94K2DHGcjIUUj4DMPcDZB80VJ2AObqlFpNNab
Z0sLlMXG2WYDTHC+JkOMxHFtPIfywrwudr6vnHGfDso9nf0DPcODnKOCg8LjnMgc
D093LgpOD1+ru9Zzmp32q/hzArvV5xvr5Z6S5A3bN6tbkZikyqGwSY+VTc/yJLou
aXYA3IBxx3ITeo8LHO7TkNn3V+EkAsimGQL4SiAFwAHNWFxWlUL6VjCKvbaiRBXf
aoO4mo3SqLeXWqjXCsuqujAVuwBTeBFgKstgSOYGg3n5q3FMXSgTG5OjOo+PVuGV
Ix0IH+GCwXdP5tLaajqX1gh/hqfxikkuEe/tYrFsyMytzxeJUDRfZEvppCv2ln+z
58v0t9T91z9j/f65L0ytt87c2PkBG2fpN+m2lc/QSb7H25GhJmGxfEn64/SPamzH
3rn0nrVD5j4FKeICClsQNfJRqxZxG6k9UBHoEcAijMCvLA9Zn7EagtYSaypwICAH
+HiUBKNVeQarZLGHTdTDkm6XjH9EM23B2pWMS5N9RTKm7u+GWOKD2LNfFd9qyXC0
ajOhAY2zSUCzgk1yxnKJMJQLOOOQcmFJCcYRqsvNKR/XcxtNAJ+JRBIcOSMy0cjj
/sA+upfkk9NYG91lU/OBxQejyk1ptQYxkxONWdOa501jKlfM77iRU2LU6wywkFSj
M0QcOnuIIipctgbLfsAnyxCk7d2Lz8dDJUGs8fiIh2d3tm7Z4grevOLSqaF+leOH
Hj4sPbhx6YKqYZc5HzYNa5qx8dyV4IjB6XHSV+AIng+zWGsymxV3ubnIfam5zq0z
5gXyys0Jd3m82tzHPcI8zD1JP9k813zG9G+PrXu8vHhgfGDxpcWby7eW6/vk9ymt
LR9mHpZfVzoxf2LpPP3M/JmlTeUt5R8Uf5H/TfzbYofPq/N0sJ3tJWGXXmgSNYbw
CtcjLeQAOYIQSwdbpVUq4bDdVFcQtpi8nl5FvUxFfv8RH1V9mq/J1+KTyxFKYPXl
YvbNJ8SasCiFWPMJscZT+0SK/VdZscZb8VS/nFgDcE4bwYnet9xOi0hBtHC//bD9
qD1jl6P2WvsYKDrBMXbIMKSeIbMLtYiAZNNU+XFdvT2QLF+ez8VbcnTX9A3EG3In
/kPCdR4/zTNCwTgiseV4dq0ZQs1LfXzKTRiQxRB0fCqTI7A3ghrCCL0wL+rKHebK
IctXrffb6IrUhyev+uMd+65/avaHW3/z1QNPrVq5bfv1126bHBxXVDlrSt/U7bTm
o/sp3Xh/y7n5Pxy+9jmp7I8H9r/1yquvcAm4HmGiGmgtvqrukHaFsQ+XDWOMm41b
jSnjAeNR40mjnhijxiXGFuOW3KFjxozRFMU6F/wDA1aL6KQb4QcrOtmk0xcpRN4i
b5VT8gH5mKw7IJ+UGZFj8hHsyXLWDmP1AM5oPs45yJfAmMom/lTMEIBrcC7LNQCy
cTAA5zQTH2N5tGE4Bvi8rS/MNJEgDfYQ4oeb8VwALVuadCHrRIKOWN/e3i7/4/Dh
sx45cfYDHhW7GVVf8c5/362IF0bs9UBb335ilUpbVe/stkfP7LagSGy1Io+vyo6p
qC3KUUUeg+qkIkWVJUqLklHwT2dYsiUVZYUH7iSEhwdcuIXQAzCJGEFU5QisIxln
uDUKqcFHQRiuOYNXjALJyg6sVxSCoysUmMkIcY9rcmNBRss/Hws+GJAcYjj4EPA9
/uGTbTe380wN/u7rsLQ0Af6O09f2EGtutoRPJQgNxwMU2iiztapIPi4fN/7N92lM
+bNyOsZ8hljc6A/FjJIUj4R1Hk7+eqqLIwvFdKSIbi7aWsSKED+yFW1G9pAsrAu/
sCzgW2pmYV24OaphRGDFDUe3g3F0O5DXgVo4kzjHMy+Eos3m82D5SaNm8RdtxtpE
cbvQ+duFxO2w/43m4LcLiVhiSBiJOJrmfqyuPgRPBDVGTdw4xO+Hf8jsFS+iRwjl
9iqLklr8M4WEkU3nsIGFZcCOcCOI8DiJNyfPz3XJ81Oam9+YCLIkwhUlgcKiDnpt
Wz5Hy3kZAAQIX6Lz+E+xzAvdUpzuFAE0+BFidreWJ9uqPMGBEzRXp5jStyEgmHBb
HCHqtHpCFOtWkklM0/PUB45fD5f0iIeg8jjijqpsTFxAEP46j2Pdo5VPzV9xX/TG
Nx55ti0+deCSX7ZPnnXpmv5y4p7R02ZM3rtjd2cxe3jhtP73PNF5H2u99tqxD97V
+X6OXqTPQC9eukpzKZLOxbapHerfpc9dJ6XTLh1486RWA4K5TqX3q0f8x/wZvxwz
uG1urzOsgEK8VpPVZrEV+mHUYHUNJDCrN5dw2OzmVAHX72vNwQfcLESBuUC04Jap
sEHNbk4faPVjFqFmpFaI/dPIpAKpmLVefaoyZoqfeTTCgge0YFWfqpT/pJ8t8W/1
p/wH/LIfmUser+DN01gEluW8n1hQCKKfsWDXTO4Zbh0Dy4w/KeeP8kc48cyTYKbz
LD3aJ9bzcXYTH3AhFDiPQVw4kYFTyJ8T073IYOFxMoFcr85hNBlMeqQ9qAlY4iFq
NzlzSObJGEsJSEhgORdxuADF6x67+qOmR8eqpvayBRc3Py0n7ttRt2RU5arOZrb2
qkWD7n6rU2SwDIWdWwwsWkmALtjtgZ2vq3fxyBYHeA611syhgDjh1JsCluG6iw2T
dA2GObp5BkOV2t/Z39vbX6eOdI701vmnKlON49VGZ6N3vH+Rssg4S13kXOSd5b+G
eow6xXq5hEC46XLLQmm2Mtu00GLyhWW9AyLDXRgSejokyEAPSZ91P/TC8cg5rV1h
Apw+KfonAI4HAXBUADiguQqLqpB4QfSqPgb3o+dRyAh+/BJu9gK2FRIsZQayRaYY
FvFA+hB0ArUwd3NcK+QPX5gKDGu4JRcHjPQMcvMXSM0hlE9gLU02nm786cBPqze5
b8LzJIwTlAnGGcoMo4z0VDFp7hILALB2Q3iaFyrwoU/c9rsPqfeGf9x+NH1iT+u6
ta1tt65rxR8MFd+5Iv23zkP/uIlGqPWtN9/64+/efAMdWpeeJ+cDg06sXpih3WlR
u6kXqSNVuTaWirForNQSz6v0VOYNzlsS2xwz9Pf1D43wjQg1GC63TPVNDc03LLDM
Uxf5FoQOxN52f+T/KPh25Lj7eORYLBPzxuWkmvT0lvurmAtSp6ifmv+Rl1bNDhsc
FR7m0XkR5iG2QOERE1VNmqkJsWQ5JlAYE+jEvM1n2bixSSCST/BA3OZWRXHRiSPZ
kA+AL7Q4H2zTcurqxXo5iwj579GdrqCOkMa5oI4Ia5wP6pwW0viCoI6YPYWIBCnT
QBRBHXrhFFJWECOo858hHRHTwXQP2LErouPqEqqYUhTpxMUOpKKf9zXXPdH/7rnr
j8y/+ugNUzZ1dzy14trnnl7evDM9T/n1hnHjNmbufzx99vZL+3eelZ44dPDNP7/5
xntclt4Kg+tV4NBBXtcGVLioKtO4XCUPwV+eXSkvl3VGh8FoMFpdDqOVYG29WQw+
MRlLNiMjriDmoi5W4MiaGJr6nyLoAqviB80hvJJsGA1JD0LiXaC7RAiMZPMgRFSG
jHYO74qnCIqH2KqBymo8tQzOOCJeyEzpWn5G1NfX2VZhcThpXMYzxbLaJ+tn4F8S
HLc+NnBe7eVXDBw8eMAV7oiceHTpxf2fLh5e27Ss8x0+CrWIk+zEKPSQfNoNcoG7
oL9xhHFo4aSC2QUrjXcabyl8yvVc+cuS1egL+n09Rpa/61NCyPVlaiU1+acaphqn
mqaap1qmWucb5hvnm+ab51vmW9sT7cX24kRhcWFpn8IppgbzrMSskuXx5YUthb8w
PWS5u+S+8nt6PGF6xvJ48RP4n/HfJbwI7GdtnoIuAEkC2SOFXYBow4lVtOGAaMMB
0YYDeZif0JyR6imG4iKLSQ7GEh7Z3D0vyENjBYFyPvjRQG1gTGBaYEfgcEBnD0QD
iwNHA3I0sCnAAr8GbjygCxEB0GD7MTj+GmUq/rUO0zkq1utDqLW5vVV8q/FMLUq7
T81bmMfywh499C8PzMN45isRuarkgObi4lIOdzdHMfNfGNBc/qpKfnmF8GKFJcVl
PTxasSI/gJlaSP8YvyogIuoBEQUIIKjfqi8sw6W7wtVHyiigzwRnA8gu8hcAHwcA
X4mVMGVB8ah8xCSaKg9UstrKlkpWyaMZhUQ8M7dwP5YdZayg5QDvAAeyK8hjhXbB
6nbRPXtMuFzcXEYX+T9i8AfmnK+Co4RyA44h4yAXskBYKeeB8eXZKmT3stG5CYFk
cukFubr8DFwxNKo9sRQxQmGriaQEGM98dSt+uUkBGGFacbdIHO5wwqE6VZcq6Qqs
sRAxluhDVOmGKuLGbr4tHiIFWKprKMUfapQUG026pBwiUTWPa3T+Nws12UrkVpUl
16xZIzRFjuu458L/CCMraooTxfi/vyrMKHDT7sJkB3iKPOtG+IW1rfbbblh5be+i
X7z6wJhB/crumrDq11McKUvzvJXzvd6K0C3775s079VVh9+nF4UXLJs99KK4v6jy
kjWjh19XEk1efMMc//ip4/vGw3kuU2GvQSunTtly2fOcTwsz37Ey5QGs1vrLHmIC
DcYTfAITcSUALVgAjXC7iUrEq2I9lAlKQjLb1QJSQK3OIgvN6A11xrom/RLkRW7G
8gPo6K1IkDygP4L/UuGuNzcBAXC1IIDvxFQRjnDLXxz5QVAajpwR1AHgJNcyUP9C
cmE/a7/o97L5mL3vs/PKC11DSHsI+hOwxNTjp7jDzVOXuJB39Oqlvs4dpGSyyJcN
KPJ4iaOvWAEr8geYGry0ZsbC8ltuadu1y5UsiTy6RR04+zE2cyPVL0zfsbHzF6PK
sdAYniRk2TH+f6d0zB4SxNgY4SOymMtbBaPqpNbL6a5KumihweW1UJfXjGiTA8NE
enmL/D5uuAaFVewT9rDPyYU2ohG5KTifEN8imCEsYZ+b8wj2f8hawj7h2mD/NE/N
0dVnfPSAj/pGY+HXAc3DjeDgySBbEtwaTAUzQTloKRLYE4qD/0dFzHjEeMwo42DW
HeVAVnFgGQSUtxHuqFj0hqlmPupGYQUbsfgS8OjAz5xPqIsT/9PchQbh415bk10D
JozdoKzarHYrz3fgKcoweWVLiFgNjhDhXg2yj6GCwQy5WG9xQiR1+ARD9OGwVLvy
z1c8PkY1t5sdV40bd+eA9ofaL140pnczu7uz7Y6ew8dN2LSeVcPRpwQokr4Adkz0
q9wsik8xEJNBR3XI7jUaFMqUQk5+SkXyI6y+OgTS4NqOGwKhF3srlBQ4qk1cvlsd
1UY4NFUGXiED5qs2bCGQxRYt/qIZI/lVpAQV9r7QjIgZEC8q7H2g3VjSvYrEUNkt
paTEmDBVk96mi8lw0ySsP2kwTDZeSa9k8wzzjNeSa+g17DrDtcZrTOvoOrZWuk2/
3rDB+DC533iX6XnymOnX5EX9TtPr5HemD8ifTV+Tv5vOklOmcryOyU+8phKSMPU1
jSEaFrBoTm+VAlKpymWr4F89CH91gj6d0uwcjSY+zw+7F2PBjwnDiY+KOMoUxWKG
AKz4KImxQTmUPJQkFTx5hY+P1teElJUio8ltNJoQOGUwTHguioLMaZ5HzZMS9EhD
IFSpwJqWAoOmaYghIXubhnZpCJowBZBmjDGNFpi/+hPnXSxq6WzsbAz6TxznKW9g
1urzeSWOap7x/FPiSAMMkNwsrZCdosJS3K5ED2R40BfSC39zvAgz71/vSV8lJzpv
mbN44gq2PhsF4pkbL4I6nHJeljr24I9hMB8ipE92alzUGK53xN87QLMih4v/0YMj
xmucwPw2xBhOQLVyyKGJfZNDoviLAT1G247RsFogsLAIBYvr8f+rDsQMRBwkK+gc
0DqHDqnvHlLf4X9bwz88iUK8HX8nzgwhcKCblsmlJjbCcbnjTqzTh0oUZjX/KwGh
9LMAQignNWM0v0oN5xVzcX1SezFaWCXrLEaXLmQMOBX8UbbObDTbDE6VuCS3PmwI
mfPgKxXpywxJWxXpre9vGGAbKg3XafpRhpHmIfbhjhHOy+3jnQuwfnuO8zrd9frl
hj26vfbdzn/rzhpLzI4SUmIttpXYi50V7n6kr/Maw1rD/dJ9lqfpNrbNjOlDslu3
1/Z7+V3d+8Yv5C/snztP6c4Yw2YMLxbkiFoVtU3UdlE7c2QbMtnsspM4DHpDkd5e
ZOMOg00vWamlCHMf72p9uZSygvrKOIB/JHa7dCazI2FKOibK401THQsdKx0bHCaH
SQYtcnRkEfPTUGcTsSqSp/DjQ68e51/QX/YX0tySSNDSK8irMSBFy6Q6HJDvI5GX
5YTNcol2pclui73i0GPxgMPpTCp6rCXQ24DnIqvNbcUyMoQRkiYD0ncMPGsrxylY
Hah3yga7w2Kziu45IccNBr2es47TzjN/Te7TqpU2Wfk0rGTtoE9rptgYE11sWs2z
eVi9ZsR/tCx2rMbiSb5nVhXaJCKSEpjr6V30tOs0lCIStgKjTjU2+rGaAD/OZI3+
/56xleM62Prgvf+HhC098rV44SlbvIxMRSdMbrfGLDG2DwtFKYotc6Sd9LDHkCB6
TGT5YJFZP/zVftUErFAwZI7s1PPF9DiQj7yg/9PWtcS2UUXRec+JMzMez4xnxn+X
OiGpHbkiEfnVJSWTqA1pEHIhVlRDBURFoNAUVAhFaSw+El0UuuqqVRewKBJZRU3z
a41UyIqPCiwiVUIqQiIVEaiIRRCqim3OfXbChpHGHo8zL/b1nXvve++c87oElEuu
/ny1KVk7a+EsEdWuU0PLKAXRNqLVDwtNndTigrSPEyUV/2mncdEaXRcW1wVABFGT
DUlSlxFoMPTVqbX1ZSsr7cWOG/yq/R/CqDZySlXZKczvi4AiEGN2WMDGPCkPe7JS
ujE30NA1d/3jngPL85XF0lz7bQSYyxuBb/hr5Yvf3uIvP/iRF5f++R55qBlzKn8g
0sTY3/U8tEt1DMg1J6KG5fV5bdfCDIOrJQ1RmWMaKxO7E4vcwuAqPYkOmAgJ8WsG
1umghHQykU0748a8CgknFzTtZLqz26QH0BWtkD9ipXwpLeXv1Xr9PfqlgC9tpe2R
UMEq2IXgpDVpTwZnvKf9M4EzzpngWf+HgfPWefucc1H9zPe5WQrccH5Tf3X+8pfN
+0418dD2rRiyfYl4g3HQ+ABTItGdjy8+HxxnG9DYB/wiIIcWskLUse02S3XwAjI6
Aa3Np6KLowLcqAGwRt9fSpgJ3pG4meBY62NgyYAtXGeV513fgOVa/AXrpsWtVTa0
bLAW6VAcTp+vWctNap1aTvMc0aoaB2Vy6FoHUAZoYzGeLMLpYbwycSWRTIgqGTG3
NqKQYDt1LxYx74kjkCdRFFJFTplFgNSIS0OkGlLlgDv398vwaB2eFIEnlSQNgva+
6iY5JtJPTXvFAdmiL6uCzQQo1uZSMBtoqfEnCjT0R3QX+JCdooJeIIjqOESkJ+QH
lJ/vOo/t7R8JB/Y0+ion1+5kWnZnflmsTA22dhbHuyuvzJnp1vgJY1dDunzprfeL
p/mJB1/NDxXGqPqEqqRnHX6ls3nXD9GVr2VusUdr0MPvwJAKd7PHUZHgbllzR3HQ
ztNKhwnMlXqYDfNh+bCSM4+xPM/LzypHzCl2nB9Hl3qWTcuzykfsrHxOuc/svQVU
XU3SLgzBgpPgEOAQ3F2DBXd3d5cAB/eQ4JDg7pZgwV2CW3B3gjuB4PpzIu+8NjN8
c2d9667/5tkUu3ftqu7a1XLO7u7TXRnAU+9f0YtNQuVFuWAs9XbkTL8dwdF+llOU
fnuvdYP44Dqox0jJyuCJEJiJYPIqaii2u5BDCx2hvE1NUMAothbU1qCqYJrFUcyZ
/ePFKmeFkGK2ijNeH92QvS26rf1Nr63QB3Pj4hObIxEXSAZv67ueYyBfzMm/kpaQ
a02yptXfeSk8K1b6EgUSWAyOgX5dLaje4b6lFXXrBJWUpi0MFvywHbunCKuxlSjc
PMZ7BEbUqUK9LEWysi2/Ar30abz8FWF5KKRweMaEDDw0dvpNec3jAUo7ck/vx/v8
cfPgaRxRq0gnqqb+j5Q2tppnYX0q1RRsVOzp+z7Uu5RHfK1XvDk8jleZ2sfkKj1t
mVldN4nupUeurdTPzwl4fsqrQdDv4gjkt6BMr1zR1UzPQRSnPMqCqsW1PLAqHBDZ
SkhpUH2kl1pOMG0Gky0wXHz0ivllBZRwSdhzpLSU3JK1FixFns50Nk9FSm8nTwR+
hxU3DMfpet1L0YEQpDBETEZfG0lpSe7oW0xDKaTyv1nJ8+eGiYz0zEwsv62J+fvt
Fu69JqaCrIK8pOj3BRVp+G0sDf9uYczvm5X9RwtjgpZQ/BcLY/4fHP8mpj8vh/mP
4+dSmqBFML+Fvy9lyQbap+37Abrz8/+3JTvvpECLWv5h2crfb0T575at/Hsv/2Xt
SjgNGlZGdgANExvrz7UrGRi0AP/B2pVwv1u7koH5H4tXAv7J4pUMjKD9OH5bvZKN
4x+rV8L9ZfXK79tt/s4VP3e4+/3qlT/2PP25euVdAncP9W9Xr6xwhXVWFBo/eV9b
VZVVBeRsMNrcA9aiDgfCqsEK2qFGPBQmLsgZQoBFeW1LKPpC7wnfLP27No9E7CW/
sHezQCLSBwajA9gmtnzJQtfGHVdM7GFhLoZrCkC02qYqa5jRc/eb2/Pb9XOb9dH3
q/VKudJKyRpKbBCxNjtETFYkgVFKsScnkSeQQR+11R3a+QDJ/bREjNRNxbcZEiNm
C45P59oxteyOX28CZUlLYwo2t7WSpUdgv9SydInmqiE6DyVIwBSJ516neqtol1qP
Kbos2ohe0u42mOd5XEAM+/S60u1K9KoUgNNt6lTp6VIierwruT1spHAZF4o6Fq7d
sSAUmJW8zRKeFnNdMsyFUxfPun3ZJMiZJVQTtj97Ir84CKexnCv8QQ6C9yq2w/2R
i9pe03IwnXRSeSQDTCmplDYamElcMlfs2uRmMF3jpOGEnWDzZidXqaFFmZBr0MnL
QfoWMFMsSAEJGRKEGEojtNnPo86z6IU4EqESMu0myhbnq05KVtzku+noiqE73AfZ
T91k+M3Ql9wej5UN1+vXdix3AEua1VZtTsCVwZcME4NowBZgp6FcwbP8+d02tGTh
iMVkRJE7Z67fnTEoGlo4ir9JD4ZraU1DE3158iad7s1QpwIHY7krsR5j8BrBkGzN
MBHfFMr0c43nbs/9n3Oq+7/AJIeKQHHDMkJGjcWPwQ+auT5ZQ9gUKYdqy4bp6sA6
l7v0gK0zTrxErdyhzJ6inZNKBkjnMad2PH8yNo80udtGOP+ILrUovpgoXK+wVMAT
JmoeXMgxrVvvlaQEVQDsOV6gZazsTW01jUSrB522WmQY8U5KnrTqZ0p9+VQg9usu
OitoOjAdqBTkRnl1KQwpGRK9MhUrITcpFJsIO1OcoEQSTCWfKnGenrE21o7CTUfW
Dgnx/MFljggR1BIxjDyfd3KMbflXPhARGdhebi1RFEcz+FXringR1m8RVl6NKovW
XFcKyEN3sAtsd0e86pZnGbWMiUlLlNDF4AUaFpc+RN8sZac074+YzuKyS9/Rp0i1
+ziT/SCUl5ZbcFf0lv5R99c3BG/3RmWdAsSHrnaORhOSi1XzOxKlhi2j8oatsLxn
yjv8H4djK40+CRd/97hNb5kmwOr5J1rEp6wBcrhtooj6WdDpowBjAjG2zBXjLkXR
xHc6tRF+fHUomCOUZEi+Qe1vUeko3+NE1kfA+JUQeFNg23nARiqZrgU+K2VhkGmx
LDTnJLZKgwKE0SITz6bkOcBkyRdSGcHKFIEddTJoIYvtHQ2mkcZiRQjI4yMQIkTS
obfZX5mXEZgxhF+3ndGdPdIjviG9LcSy9sQya/biaNdJXGqS/jrKzhuhjXaF2EyW
8PXM7Z0l1C3RLn/IV4grozxBqP0vcgwXV1Y8wlKLNoQNOO4I9ThX585flG7JCaS8
n5/CLGPEblB7ceAXxgWdtSo8ctpTbPucZ470NfYsOMqf0hNZG/LmKUEu/xfMj9yL
y+7e2lBeMRPD1F88FK54z54ztJ/bu/P2gcm0FfJDsVijWNpo0k0y2YrnclJdwZwz
uSOfAy6AXEsCn1EDRcMXHMGOGW6wCALWL/H6sK8Ix9t5fAbpG0jYOc5aD1zlumWv
dD/ydvifvV16r9IiXlOqkYegEqOyF/PgM59LGk/xs0HL9apmn50l1SZ3mBZXuBef
8N8+wFli61x1rTgnviC+aDejatGjGfct1gl+xF+HgZrdWa6K2uSD4c2+NYkw/WAa
rjbG8FUi3wKEFsRFYwyT96TwYPQX0mu+I4ghZMEmvw2YDIIAT8AFyyvTmrsA4hCE
IDIKN9+RaQA+wNV7AzxDROChh5v3xhBKMh/wwRCsYK7fBmQGaoA0gJNFkAzENH8I
9e0QEiDn+3bg8IPfHUMo0XyKD+RgBbP93kFmPA4QB1CyCJKAmOYBYCjggAd8kMyC
YN+DOE/B7oLefsUQejAtSK+0BCZ9vgWLCHf47oIWAbAAUu84MH1+AUkwBvA2SBRU
HP0HIOZZNNFw+JoKGMeDrkd8YaZvibyfgK88BIgwgy7B7AzztltQ9FtCIJ4h7bAX
L+M4Ppm01e30wZsoXn77BMZRszWP7x3owOGH+naMoVDeHXl+WND6WAF6AD+WNnqU
Vj4ECIYCQj+fO6aqAAI4A2QbCooAjv7DAEKAnzfWMIoA3x0zi/Dmg7+fTm9tiPPE
YaFlQkfVoAjOgqSN2dUlc8aBhWlVR5PIDHNj4BaLJ4kQc1j6+BnYeSj13ocqlrrF
Bxjeyt7jPo4+Jy+1wbDLJ/Xa5qGynQvlyWcQ4BHqENwQ6bCAboio0NYjdIP7w/tj
TWkTu2MyGy5pHLEazLxwE/zPfAzKoT53AuoFUVjNSki1fR0tFk0sDvI/s4iPGy4u
yztWRzXI9pzElCZnF0y1DeiXrm0+UBzQAxvPjiMqu7bx2SJqL/scbz1zGz5D8Gb0
XGSqmTkxRzD86iHzg2nEaeg8GCWfnud6bwkUCSigCiQokvIOAc4M5A/hvLe6V1t4
hsKNFDuqX+9K1+sTRprmVkNWQxwsiRcPOR88KF5faqe67iOtTA1qLwrgDhaqgHG3
mfVCa5fJnVKwvQXPSgm4tPhYu9xu4p1MQOfZt2CpJ9FNB78RQdGIBUE7HLx0Y4Si
gXUqAxHcEUzEX4uG+FqOE/HZVuZigMVGBlAivdoLIwt++Qaa0CpLn+GLpMxqgitn
m5C6OF/6m07V2E9Rdx+Ht9K3IoOn+/TUOZ0zPnLYOy+co2gUGK9ger0gPxt71XMI
dC1f0zO2KzWnHu8jLex4oTiUfPG8vb5huqqKfoMT7kF11Khm8XRvAQNr1S3K8lbZ
K9sr7eqdl++tpdcHr/CmZyFX1bcPbp+nk7arYi6ULSwEwq2nY36uvi2gB/oE7d7k
Xwc1TS6gsJPvSDAJjsR1r8K8hnpHOeeKvaOBI7xtezt8IReTHYUThu2HsI6rjlCG
QCiQnv7xrc0LHDzhuiFzZlymEOHMeXLcmvCQ/qHRV4/R1yFztZ/Rbtjq6xNb2D7D
tIV8GMhElFsm1hfD6dy5hDGeHvYhIywa/PhsaZC8V7Vac+y1etzWRloYCc1WiGnn
O8IK0cI3ju/8+r/WCWPV0fhpRtsQGJVnWURlC44j1uQZIMFt+mnYdwYw7CNWdeiv
2GoNrZjZfeo3N7W5jkkT6d0xC/U8dm7E71PZ31SdzeaJJ1DIFySOJtiW/aD1pDrN
ImSmOrvQIUQDKtghtPt6drxSdKX3upAhAG+sjT6xECVTvxlgbJnujeLLa/ZIHyuz
XBPyRRcUlK+m3+unCZrErRnd3ZJdofXophZ4sABvybgNGqm1QnoPKWgm6Mnx8IcP
RF8/KJAQLSmS5VOwTFAOX0AOt4NE0ZvcN0M/jx+PUz+IFnUWzzopFy0cj4kaF8kX
hnzXoWYn3qH2IP4DwvktxrZFYGnbUWiijvU2fMXxq+kLPu6tMKpx59FCKgif8D5c
oed80U+5qVQKH9VXycxhbVkosfmrQxCNsMw2oTdRB+X6q4tsrFaSaBHRUXkUHmz2
HFXK2lhQD41Ojl2FVlrzzCmrLFeVj5FTbj+2YjGr9rLIV0NjC6xMENLoyygkzRaz
yLcqjDtN1iISNg/sa66GS1mMx45r5a5pVg3unefVkNwoUXs+sDa7bqQvI2vMnJMg
QJMHRRzUk9ibKPRoPJ689OkMq9LKFBdV3CWXm35eV9hOgSx8Ms7Dx2dIFY56/jia
9fUSkuhKPrCNVp9YA0SoTmRnppWvCLnThj76+SiwwEnzH3rxQCycWM5W27aCvQwd
QhTEM99cQqqwJmRmwBpUlLFAcDFJ6okkprFpMzTHlQrNpIcjmfQ2lW7LoIaDp8TO
IoMgGEfGrWYXQiB2P1faRtJbKIZ6tUzfxBiWDykHNMqgDxl5LEhpPvKkUyk87PKl
kimhHPK7xc/MKqU9j7DhkKORx5D9/Xv9t4/J55pw42/mlpRwPkzSDPEBWykMAJwo
viXpMab76c7ajeNfigMEM0s2oHOmtqOuVDR7RQ6pWjPeTJc9z9ee1Cij53/0ekiI
ooNo7kI4/LEMZ4aengniK03RbAX1mIeNrm9blIa+RuUOLUeRibzoyBgdUojSTOSk
7IFcJ2iJXIYWGxxFzc3dOC14BUXe3Ahg8+ivt+Tsa925QlgPbABG7HUceMLOtT5R
fDWyIZ/QadgluIlxorsVNAoDJJ17jpybYjAjL5PhTnYdxeMP7dWCW5bS//pKfisT
OeuUPMbVOwSIajRMrd6mOSrR1LqvsGFLNifEqzeRxSOSLz3td4HzPj5BgS5HWpZi
7iny5jwjt0TVCHiOTKF4YTvS+7fQLszHdaN1aOlY3Pwyz3PJcWPX5d/S5uBu8KxF
ewZNzh2Rk8THO0nYA+nSsl3KQ2gzqczepmTp0MNsjzZkP4u50N7y+NRiSekjbbEJ
ody79rXT0N7ccQuPM7VjQ+lI5apj9etqp8M6WaI8r2TDq5FTe2pfPEO6rTxgVXI9
67HsFvbsppApJ7Ud7bSa2MRQ8JH9Bcx1pI2YVXpNORZNU8uhmreQ7sGCLd3CJzYJ
m2HsDSu28jnROtFsdm4ZmA0Uy6+pzM/3Gch6jUzKonccT2Ss1/LP9Tafm6Ue4cZ3
8/o1CKD5hUJvMEzLNGVMbNCPpN+Ij3c39o6XuE0hT0GqnItcMU2R65B5UaSOCkWg
dtMprOfwtMfPiKwPkk4/mOHhh50WacpZWFI+bNpgLyvDtkR0C3hv+dKjTar+Ld3i
9RV+UkpqTH+0dax2lMUqxrn+Ocs53lxoLZ6ftsBh295Kcndu5IfcFImGsBoDoetH
mosF2RYMVPiZmBtSozes1+E31GvIW6ntMWX7adGIls/qgrn7tPU+lCEPSeywf6Fa
KXOmUtfqpPNPrjx4dq5lel1cvfmRpJ3gfOE8N0KaMmor63hYIIIyVFwkq6nHkeNp
KqFMLGZX7yqacI64U4x1yR7sHP6cRK3BhfC1uUfTjY2fld92aBOnmuuhjJh4kVhe
N+Ra0SMmM1TqA6IWEoClrbcnePANDo7MIBkWFAF8qf7G3MdpNZjEgX4DzGKeytC5
tj3d0xKYqdYd7CMwj0XoDfzVPneG/VWPK1dP1CZ0J+zLs69X61dO1bLxr9asKYiF
sjeHucxqgI1A7At67/z6bb2pmWyy7NbhxOHL4YUssZAEDdq3bD2JK5ernaseh9u1
9sDYpdPiPai56j2HOdg5WO6JyyOXC7hrp2OZjVvLQdwthGS/RMQmhqvYktTVEnlT
/I+zvNcv6MZ1wb0inq3SWD6eOmd3mBz8St6hx6Dc7iUXGdVWrSrEAez9rM2h8fE4
qECfiP0jkiyN2+vKjZpXoelcz21PYHgImz4NZC2U4q9FE8TSjly/hDFDrh9C4e1C
LsaY7sQ9Z7yBCJx0c6Zq9D/3RJ9rpzXGNUVONGSaOlXjnuFv+kxrxlCXgqOAbB8f
P8nlGJIGrkX1IWc/aa+lSlgVwnqdV/RGtLJr4iNv6DA31lDuhtaJwcXLTXmC5jqx
L8INXxirdBsX+Fq2HQySrZpdj1p8NTN4JS/j8J02ji+mDkk5hW8zkIEDBsIVHxMb
UzWpbkVvJPJ4lMLQ/ZSEZXTnCtPLivXnW6k5XpWLanlHp4DrvOwV2cparea65Kmf
36VgOfYddXifr7C9EfvRs7lnEtMSi0ofLUB41q0hSOmQdcbHwXm8ynH/Ni5eU2r5
iPBrMX1+i2vcqFY67jD3+5ncy8A9lmug6qWrKwrTxUBcH/ZGM6VrMk/WQNwjg+Vs
xjyfRqY0N0ytFoNhwoRW99E3LBoPeOcZxyIR3xnhFpxCFKwLqOJ2LpLRpqUu3oQw
sbmWw+3iysnA7NS/ZB20Dll0oPZJGvsynX3kdDTTY7zomhaCNgpErh9nB15AXKOP
S5u5RjfTlZcavdtm4nyjnPmac8uQCMvnehRsYJryGu6EVt/RXO/1jtyiazF/YfWV
9eD1a1tKiZTEhOYJcf8vYWKEXlg2HzQ5Iwv9MViPlolXi6EUEzUh8eYNIwpK2Zhp
9tY93idmUUXGDtJtdmKhCjW2DIpnMdPJJRinTrFbGLeGXEwnbOVtRqObRMUKSeRG
o4m0CKW36H7UeZsau/3VdbboiUklUa91mfqneGzSzOcfIkn63xXQjM6jyhJx5z2B
7UvWoB1O1zY88qTJFEEE5F8nMprzLbrKHSGKQUVg3iRmRcQoSkswuqWF4/T2PrBK
975QtyCn74mhazPjb6hgQYN/F6nu3ohBMLyE0eb7HOyBVQpLIXj0MeT06AnVOELl
cXlMbEn4pxCOdA4P7FUj5ojwQFNS/bxno7wts2XxGJ/3KuOJkkIwgHLHr9VnFG0e
yioSvZ5xVclPhq+bVrf3bVZ1ie9ZK4ArVBTb8cxMeNg3lCB3bK/oOy6pS+NYRbn7
MCQqFHme0Tw3mlvu69bg1jx8reJ7TIfy92py5TN5tWx4x+7RgquTZAtHx8OaZsV9
ZayAVzAwNnDvluHrGv36EINw9BlGwamRq04RKjM3Nejl8ZZEsw9x9bUo68CllopR
xl2j93QuiFH3zq35WF6r81tAN834ph8g5pVvbOnOrit0yKOuWMAj0G7CQY3lzMoW
VLHYtIn5BhdJO0d7nyaSrBoRnRSU64kUVL4PmDo8FiUISaEd0U+oDnCg5rRSIwUi
9LV6aiIWwPFFFqFcMAtAejCZvhhDQABLwYIQ1wp9pJafsHaEMG0S5A4Mf19bzI2G
dRVFD8EfSeDBlOtEKUJQ6SWeIfspckRByqghd8mcOS8mJohCP86X4XVYWQXQymUK
PbOedtSmc04UD+nlKOzMSYex8ser5jSsRbxMuEJB/rnaYqpkpMGeWXYKdHa6A3y5
l+CSsSvU6CQaMtFJfqev6CNPA93ge+RCw0e8WOuo6qz6JKNrbtjaPTYPw9rTkZKs
H1j5ciuUVRp0s8lv2unJTiIaKTCwuEnHRvWGk+lzqQyLM1DQqXqqQwbSllH6H+Ri
ihs4iMZFqUPDl+efpNRs0sc8QpCmib8NxGbBaoLGkcJDJQ/1gErces3JxJltom7h
MM42vDDYz0V+VwM7P+NJxCAjGbtnFuA1Wr64c4YpwQ72Dp6UlRY23KSAr8GV7c2Z
rhduvawrn4jCwH6X0oxNYDqVxaSkpIY0DRFhpcfngJbK5TNOP6qcjyckWrb9Z0kp
MaoFTxJfzLKyLHJ9ZapVmOf7utI0+PiL8cpc4NluGt6ZqDPqIeV5ZPXtU7A2lOAP
m647U7JE81ybT2gub+0BRR2Nu+HlkvFAhdeTCpLc0C8OGBZecfOvKWrjjX2WOmdG
NhBxDj1Cdkm+ajqawE0ib++FGEcZE61OsZ7qVJO3wVqVEmfdXMkSxIbm6O6yGN2O
0OTsemrY4jcnkPLu2nm5u8N+N5W5n3dKVCpgRgYQp439Cc749aNFvzfSkFkHqEFh
jVneXLTULiZbHlqP+oO0cRSNsUKgI5v3WGslTbAHGLH7mWjKFgya2LYbk2C03syk
2l/zrHNf23rktFt2vMVumSK1N/5oN9lTkOnuL/9uxXHtZEX8ukbD3gVQxejE7sSl
0m/ExQduk+00S+VCGPNFamEjkL/bOn3V3e30oveNhZx5gqW5ZbmA1ngDz7O4VWCd
5piSg0OF7Lz1anqLaBa7vBsZVfeneZe+tUIeZXmXXY2B+oMTY5PGvXNUL25mg/Ns
zLmvIWjc4ZKeN/3cJfMwsdY8SBrD9aMLL1jjQpkU0DU+FDCchbjUusfu78zWuHxt
uTXzYutVXLc6TcGsGXSTW+nowpt/5lHnYVDD+7UhwWJ8m4aDtmFCqSA1BvWrdrfN
St3xwJZXHluT7NfK5HVMJakByjI0iiEm86ColseQ81cJDkJkQc5ybjzWeFHi+YVr
n9yFz0/cWW51zu08PbHzSaFqWCUNpCV8xbWVFWS7K4i+nJm/rJ5wVmaNo8E2WhKH
MMIRKekglIOGFbI1xpB8g5UbL07N0OQSG3/ZR21kbNy+lcdwiTFanIAfsm0VHVKy
ZdaMbn1SlEjz4sOLD/YS1jbH02vl5xM6PF6HkceRc+vTdW9EGOBE8dBHjB9PIEiF
SpE182yG4TswKwI/vAnbOH9CPR3kXsnDGi8dIidnflUze5VAIpQf7OzEPI4oGJP5
vHQaF7edvGg/Z++4oLqoqLZntSc8idYJhUi1YMKA3MJia2tru7gs6BXcseQHtg37
JCwrw7Gx0kbFo9BWGJFnWbMvDlsl654nXJqeZvrHcDt3Uq0Di7ZVWxoVTvXkPFS2
OazGTiRv1pnwq6kcv9p3D2lYs5N9mLewtHljo+NpIaLN/raq2Er5EFEkOrfadrw0
T9RDjkCyEbIsHbNszm8miDB79tFIJ6N+mFGRUYrqvIffpVRqouQ1lAb8meT7Di6m
3A63ylFznme5Y25N3StoVdK1kqlYDyxyms19w5lmRwpiHuIajaAlhro/g1f14TY9
WnNiMRdO4XUp8rg+6DiPJMO9DYIKXDAcWTkS3/KzXQNSxFRcVGBb4GHW0h4V9I04
GRAoUxUIqDmKOETjbqNbgEkArEhq2M6NvnYdrkfokOoE2RjMR4YFjUs1zHxoMj2W
4mXn9RPIe5Roua8165lx221P67YztI4//fqGNbOpPe5ausfgTUg493HNcMrUi6ZN
8F7uEzLgG5Mn9HjFIRchwmSJvQPDVSbU5M4tpTpNC6dlISp9Tb3OvVc1n5mCSQZi
YjN1s+zRLJRDadZfJ7VyyIfFpVe+JA3VmFu8Um63LOPkLORWtj5mj6t2+ro2XmwO
Azt1xRfaAZ9791bD1cftgqNiqYrRSk9xQxM0AucPYSzdFY/0ht5JLsfnZcFTsmqw
xg4VueIMXa3mogc1HzGYKTE0EBF4WPIzW5bmOusY4skYotu1Mkcyo9gTucR9EMFj
IkQKOGyjMSw4KWivu8BXAZ9RxPlFl9+icnmKH6EWgB+YgvH7ZD4Hku5hSErFMRpb
dK/pRjp2Yz6jVOavGq9X8okuyJDLN53P+6g6LaRbkPEoeOfQtDzcSMlC+01tpqQ/
Nop3ZpmCA7rY8z4YY5FiSQRXttuXLls8k4lXl4gW8V/7xNYGUxWzrBpoeoOz82O0
Bie7JjOCYPBdT0549WkFI3kl8C9uwmp2IqQ01j41t9N0huKW5NKftmus9jAwNguw
GBkxU+RIoy6Yy0st5xDlvJHibHrfWd7OHIKQnMW2GE2kl0MFhFynCaw9sBvePoLm
8MV9KumHiKZQ/E74BCdxWIGH8/jwUdm14emFsBiMkzdvH6Emfp8fm0nas3i2c549
hBMmDpel3rLVrth93R2bzgZ+hLIxoTq0N4QzyQ2z1R3ky5mqoSUd8+aWFR66E5vt
r7oGGFVpXO2NSWMAJo8wKXwyEhrO/J8oLn19WKj5WohFIEUPef/0ydcvb7g/RYZj
M2iUyC9jBKuJToJhs5YZfEnSPo062abzvzkRq3MObSETfmOBPT2Dloyy7WR+DO2r
xqKveHTx5Ig0DoJM5aP9iurhdcZrxK/QGRtJ1p2Jc8jUX76+zL0wBmoTyFysdiGf
9KnZX5+2qe6Iaj9dCE6Z/uyPL9sfF87NlvjMPAtaQsBRyjqfeYCRro7lVKcmx+jC
KPd6xLa1ye5gVZaOS1bTBOVG1NbIeGllEwnH4/oLt9pIgbJGm/XEE3ljXishifmr
nPJOHV6v0kd4ZQToPGY8Mf5roQnlmLRcEV9EMLformp5M/YsjxC0fEWeOu/qf45o
PBR9Ftd4Eb8fxpDCxTBeYQ9eu1O72xI9Y63pMOQIrLB3OJTpjuxe7q6aiU254sOR
2DnXWzrwd9Lztm7pyNHevkQV727gNC4tba+Fd8B1kH+d2VvbMb3/lkmStWzhk1OC
gvG8obbu2pqcZzZjn+5HZwnNVDl+0rr3w6M2EVKNNGFaSI0tJe0lE7ZthM920PQi
XnTFP7kVpw95BmejPILV23rzsC7sWAd3fnlu/lykm8jYfIRYuA48151UW/0s7XMH
TKj6QThRprlwSC3DrJlENeJ0mkmJHkOLPa31bmCy03h8GYZSV7gbnXXh9VHIGlnk
LR8B1Wen3Q0DCi8x7AmTTYEOfaeYZ8DUZZ71hnan2ASEfkcypyfFIWpeGO50RzWr
zumeCUbvswfsnNYawjrhOz/5rb2VH8WpeffCYYW0U6ofF/4DFeOYyPTRbryJBsbk
tC/Na7+WjCXRhhpWVQ1V3Dwaxg0moFpOWqe8JS01NQJ2EFx0KeJafpLKuiaDlcHm
SdK2BEFXTR1Q53PjWyOqmc3GdnuvzTcSY4wNzzbkX6bjxEb473fTnhQF1+SFNvd/
6adHpkq5SiiWseRBY+MSMsHOpzZANyooAKiamZyYY4xq1vaNZtkGPCyKk4zBORT+
gINOygte9X6XOUdZEe3rF1Tq/A3ibLbH4oUpDNz2JaJ6WsXc1a/aZ/On1E9tZ+Fr
anbgMQ4jLIPjY8+UF0/qGojLRjrdd6f8ciLnznrtqnGl5U5d3aVoJa8Z5eSDChUT
MJcknDLSRLPIHt9k4NDsomvQuIMPCK3ow+dTWdLVD9ipfPZCu8mRJaBm1jCcIrs4
oJ7XVqSZN4B1ckGtXtuoAOpVC78gWfCvwqSdR9ds6OW2pHrW8WLMTCQPRiX4Qfzu
S2KDHveIKbjzuE9CmJpweY5Kdeij28pfTl5QVRyzWJdEAqk+mz2U/dC3O8FqVer2
XsaHrexcNZdudVkhWYeu0mTanhlOoOBW0HJJUL3ebRZRga7AVNK+vhxfpsqZMNBq
ZgBdISezW/klgD3hwrQpu3mHmS3AdHYWDN6DPWIqrSHjSyCV8HZdWesSy6tCNcQT
mzjgZIOezPp4to4Ex2R21xIGgkasKMlXDloNBzOPyXgmuvPR88QFl/3khShi3l71
oYoixreYenQdtTznZ7uRBU9rTc3EtIUAnfFjDG5T174wNjMMHo7BC+iUXd11X3bC
cPedBdopD3NvOmwmrlFMIieizMDhimU7mGckt6fG4/oW+wjfrPQQVhHNdM8i7Rni
dxt20cdxt8yy2iHXKVWNQrCGeeyTRy5zSFZ/glwNGEE7ebEmqSAkDCUHpQFOBw6b
3UYkNBuWzSHVr9XfIP2+s2aMY4VriWttNHxkD4GdKrl0ZLvO/GwUqVag0D81DoqX
Qbh/9CxEddnddqllquMmUKUa44nZom2JG3vQNZ9yBeKbLwzUZFGro5ZbGMKoMIkF
slYOVuzBNjgD1P1UPDNlhwn2rCyGCUUNMecrXYJ23ZWm2nvPssfgZ3IW+pBk6s9N
5a+a8k6ygjZPNyebXhtnkczuVS5Zu9A2nlO3Vb3LPhN2SCHt7AKHDxZxh8psTw7G
TGZim3Y/n56X6NEY1yp1vXmMds1W1AtV8zeThUATMUABdhYG5t/mCv3cC/h/NFdI
UU70uYTIj1ks3+ek/M1sISbQDJp7zxZiZf+ns4XYfmwy+58eoI1mfzv+SUygWT+/
n9Xzzfi/OubvZ/X8M398m9fDAZrt8o95PSwMbN/3pGVgYuMAcHCw/WlaDw3r/3he
DyiFfzOth/0Ps3r+sCctAxMTE9zvZvUwfd/1+Xeu+P18sh+zepi+b+X826weFnZW
5n8/qSeZHd5ZQSnh1mtPynq4XOoi7QPYqZ+EhNVjdXVTs/fMHllo/OnZ7WJwpnBR
lXDD6dEUYQ+2aunBs3nG8bSeDPILPa8R8xHbhkiyHZ/o3OL03HoX8sl9g/7pmeqT
zmbSy4VE1U33urKFqtOVq337/tvbddsBqYUcDU7Ao0oImCIW3Gk3Pjf5BVLgdkKf
h3wIG8rw+cQx0DrgQMxzScWpaKGUtiO3EHJxzdGh/EPowRe8z8O0j9uck6ScXSf8
Gm+wUi8e6/VehFosXZSTLqGylp92dvojB8ZaWy8MPiobYBdibzIxsNFJ8npbnGmi
IDKL3wB2kR63Rxkg+PULuiI/7oa3DxScHgdYvn4o8frzsW2wcc+jS0S2OKomVsN8
2wcI1hdjYui36l5F1z3xJdKRctX8haEJDXlpji1XXY/fSTlv9cQ30TBhN0O/zMPy
OtO1GCrboSgFlgikHz5WicPDqZSkVLYVlZ0i80dVCK5Syi0mZBc/Jh4beH8oK/iC
Ygz33XBWcfog/pgnOdDXzy+WGdOGzNHZNnN6ZrA4n9APNUJ/UvVRqxBJ3pyPnlNT
DwEWbVHAAVSZ/tWRJs58C9LbN6kWg5LFb83Rx6wUXXCuPn7Joigx7gBWTC2+CKuY
dI9AjGgHVOCOaj4BkrzldHjv+f4jzwfaVvjRdR5E65FFRJyCYd106D6cWb/UvEyL
L1nQb8yLZX2VcDTzmkNxRncOnkYPvNNMO6Tw3BKHgnkZgAGjLgjkGCRZeogzhJZA
M48pHJlvWcmukIce/D5GFF4QRi98SwYeR5BMSeN5sqqf90NhQ13vT5IJ7aNovlQh
Ip7YU+HMlUSwIXoFcOjUGPmhquCZ9ZyaFGMi7w7TX0otwY+qD6uCBeIhBaok6dXT
Et9IIeDSE3tS+WHXDrc1Ba232bSZtH9oF1rKh/Jvf1TqSkzs104vo3wJ37JT3Eu9
9zg23H69zdO2wbks6/34zMMaySUc81HlQVJXEkbEQAliqyiopw72/MDI0iJAiDM/
MJAXVSJJfUS/YhPWNqZaLOn99GtBEctqC/3G1fyNV+y+0Ik5oUsYsWTYkSFGEARw
EP6vfAj1dPPpZWkQPqFCi7/24WjhC6eXJUeYfO2jqacb9NZalEUVodtPUOBls+4g
rjMEkzch9xPu7dL8ZyRaNnLhKSqEH4YwcoYhHz4QgPAVSsuyxV8ze//8jZ05orOy
RI+O+go9KXMVBWcNdLQisrO6RWlUjaOMagCtQs8OvpCp+mfEp/PbRO9bHP0eqTfo
fVIWctKIHlXff9hnfjJ3qqr0pOESPxWZkVXFSCm7X4biw4dLAm8d1IvtHV4uNd63
lKtm04z8kXt4GG0WUPoaAXiyU+DRfQkZXCtmB5QyUgcU7ZSPkpe+kiOXi1I1EJ0h
4NtOhC6OUB66iLDD8Cxr5/RwiCQPrKe/H9pJC1oxPA0J6ur/gqT43lHWyFmkbJnB
mMzCsXxH3xH7cVdCchKhVHFikIyCl2za0y26r9SSYzs5xikNPbTslHXbLxnBS9Mb
hVkSh1R1xLM5DWXRutuEvSVN8wMSAgMkd4Xf3za3YbPFc1gzKuAGjnC9ccg8EZoj
FluYIX6vLSN5ctvhMDq5u2ftUMjs4gv97mAswp6yv/jo08QaN4XbzfNt8vp2LbDI
uVziLpYgsSKfvDzquuzH8MeBQSmCD5Qcoj+VGVlVhA1vL741ThZdyqruUdstUFYq
dx0LixCzDMsvrewvUxM5kNU0IrSFC7WNHvHwqBqEUNvbqz3QsbmqIQm7/JiJVu4c
lbfGaiOLMhvUq7NOpDZ0yhjZjReWEgRrElEsz7JSbdtqGz+ExZZlmaS69TH7aczU
5YX7ibbd+6qqfcrOHY+8T/MiuIpscFPqeC+f8CCXgmV4Zbhqt4fvbZAoYU5hXRNd
EllNLB+IB6SsLxLv+OlhZTyGhD8sxqj8SEtJ15KL4t35mYcLuuEF1RPAhZp7yvGg
m/MzQ37kK5ygt8GNsCKLjpIPuLNa8l/gFPleZrjRI0q+RawohhWuVql2yowtxrfJ
WW6BcyhGkH4Ru8i9MlVRS61lMyq2b0N09SzJOLh7Hy0O0qgYJeaj+OEm7OEp2xfw
tW3zTIIh3GkoGuZDjGpM6M8ss62ckzQ7YKdB1i5H4eSh/NzYAOSt9MQC189kXx62
H3CQ6uI0BhDYq13Nd6mE22TCkB9i0+PmNSNWyTLTNW9/eXaGdRPUa4tXVqZc5D9x
kDwUssFw6AKHNvK58iHO5vxn/xldXKMduYelz62dVrK72IBgdopJKw7YirJXVlH5
I194cnRZ15YQLD9i7HRcO7+GLUiaa0YqtmHHi5XJjsJdCbM3qX5TTXcO3Zh6K2gT
tCbCPVRk6gXUOTI8Qo5SeHSox3Bc87jI3zFoi+wFzCzUM7PKE3kXtJPm5+zgelg+
cmc07pBeaXXDbHEh7ezIVLZ4RZ2enP5hy3QHiO7Bhfq7O7aOCZE1rDiXYFZBnI2B
+6sLQXyG1oZOxFjnb0ztmNE8OC7UgCGlFPL99hSZ0l/4YULd2WZhkEcC/D+TkysK
f4aoXb+OZzTJ0m8GfmrbdEbkLEGRKIFNLEF8VoJctZjsTIe02FqNif6E1Eb748Li
pTN+08cP5ExRxsb6xqSlZp+akyxJNVo4p5BYP4YVL+9wUNqUVk257UCcMFxGePRm
v9hUzLF10YSoCtDotlq5qKGZVd6jX/3qsEc9MHIVf+4+33yL6vWWt6epWWexaSwe
eLqFP3iteVqyZ8C9QXNhcSx1QXvdtNF6sQCbNEhdgFoJN/Pq2WvUo5NIRBGAYB2R
aLj2cXH0F6wrDB3vhWWU2H4kA1S3BwQthrTw1ks3iLcK6z6pJeI5ukS9izfwbMvG
cW3cgbGfGZN0udyQd69QqwlSMpPLE+faLlyYbgK8IghaeW5oUgzWdQO05P1Hcr/K
DAY7MDXosC26Z3DqQVy9zG7dBubX4XoiNL3U2Qi19F7zQF4pgY7zhR+r0UtthZrG
o1CFYhvmwW59rkXghmCz2l8mWI3UOSnCLjMBs70R6gmDVEYyu+0c5jhvX67NNdne
Y8sS0kx2xu7ZEiNAVAcPfS49N+MMvVstOCG0jXxWNstvjSdhMKAdHYPlghY2JM2O
GFyjoksyL1N3y1zWyl/5CH81pZO3laE+dH+ltqvXs2NZqxwz7CP9xMfENOgw285F
KK62Bl9H9p7T5b4zvlHuSrjGceSDgRfPtSh4OS7UVwS4AmyERaZiZTE8QjXwN9sa
3Fl3e2dMT60zEOIX6SsWJMg6ULACerKvnekKJ8SAldhmsRMj3RVYRZ0fTDtnhdQo
291VW3KapQrU3x5tHknRQ6QE5T07N66GXlhHHjqn38qzdlDqa6q00xY6ny3lKJMI
MkFH7wdy7kBNrAx09SbTypSJLY1SRBZyTKnFY0cOj8grUK+tZAkqvBwCbDgw5z9E
qtLcj43iampZ70ZElI6OnREb9Iz++EGUOC/VNFPUvM5RXqoYGL5a21QGbKfWWo4x
DadMH958O1ualVQUuZk3Nb5DcpHCOUVGgclSK5d5zhUq9rTDOBMj4ll+vrT8IF1N
9EWfFnhVU//mxzSKdOWiXdEXnIA43afDglERFKeQDPY85pC9QBXITaQUQQZKDrtk
je6Y9xQOrau1MxOUUn3aTsljxl858ODGi8JVqNIa3+4mwI6at5JfqAsN+oXXosPB
OIo973z/ca8YSvlyN9BitWKXqgFuQtqjOhrtWahGruG8K+02TAxnrkZzWH6FMu1i
/1aM4jKfrn/Wjs2J9ti4uYLbl/N3yOa9dtvXPq44rmxS6MboEfZ5l+bkJWmchlWU
BwvkFMI1wntwsxu5sN2w5MWWwTRRkcs4gSmvn1ShmR73sGb3UF5Ob5PCjBAWW/a+
qJToSXlny/kyJkqV1bd7jT08Dsgy9Dw+bJNZnEmFYqD0AJixFV7/1pogqFz4qUw9
IxSjChSePWGxMa1RMj6BPJURjZRAlX7BMQw1el6SfGAQ7cRTCZ8PPjlajWdTgmJu
mhkDFe6IefJaT5bhJZtP9s3arVXg4EYdCEeHBSPefGXxDBsp4fgkvooP73EWJX+R
1i3R547+Oso+USp5TEsPs4BUeGp+J/TgcUGl30cl0VPWNRWW3MYJSfUi80qvD9g2
e7Fm5/gKTeK6EfpduLfxNNhme0VwUEw3PrVEOaflXfi1GWJ73ryNityFqNVx2lLk
q6FAW3Gx/GM75Rxaq4y46JHy8scqlaGJKMtSimeaF5sV0fWs1FimFOaPo7bQg5sI
oT1gWTXcM690QluG6EaVcS7S1bgQslvwnZjXKhltHvA2N7SBrZtl+/q5qM888HkF
W+vK2fLAx1UtD/kMYvfzxslYqWE4BNEO4BnWhu3IZ9TEoRdAYKzS+4XdTNna4pfj
NL4JaSHPEn1pZ6eG1/DS6UTNTPLZ2t6OXVi485A17Jt2AOla4fDTYqNH5hBF06Sf
DvJquKrKVCMZt5MknN2Cjw6MeV29sHWACkmDOH0s4l91AYN63d42dCsQ/BIhtT1+
JfxjD3/aciv7VywY2JfiT0S6WDcc8lLA/StaO9DpBjt7dCg7KWNVaVVYw5T40Ydi
9h9+oizNnpS3gx3EZHEns81ttN9chBO9osBBVR6MI6ytSnz+8lIrmJHk7steN6U3
kKKBXEss181XTf8IudvwUWGk0HsUeBI9HySSYCNKQEOXbJRlwHlIdrSG5bkx/Qoa
VkKuWgt5tfynIwIcX1cN5KfqaY0cvdqmHzRfr6zkdQRLUHuZ1YuGTXcuakY3DDNC
R9fiMe1WaWgnKEHmvxjLI5jZJTGl6k/qIc1matAe7K0haTfKNqdIZnpmI5xiqfF8
InDIo/BaRstpZGRgocRVZmXu65v52mrg8/Yl9KpzTC407JFQ46BLWm6skCQO+8vR
T+kU70vth7aoLgXI2iUTluc3XHh8U2V04Ou0YFc1nVxzj3WO3WMuvNrsJHp2Dl9p
UVhmV8zYJdoGr+r5SqemhHuGlmA0fLIYTMwlq4p74froTM87B+FMcYjYMBjY+UVc
9RVCk2j/21f13cZ0xBoRaqUmPZoyMckvx/mbZp3DI/g+6xTUxqlrV28lGe3MFjyF
c41O1h8Y3V41c7E3zpWmo+iPI15Z7R45inoVErEk3+9Yv9dzk7uACMDnuhJ/6PZh
odhLqGniEms++uQw2ETHAzoxrLGarsRAAXCY+8xp78qEpkdix3OOsMsnueil0JrD
Wt8a3loqGW/SySu5eHfzw/NyyIteX19LpqyEJxSBF5bhTPFNorAGxIabEnjtD7MY
tl/UTsRhGY/Lyqduchi/hszr2KCINas1YMWi6eAW7scydvMrtPcfy67u8TyfNYIT
f70+Sm5GoZwdlRujoa3U+im7O4nV9ym1RGSv+HBP9ePna0fqr5z1zI8rtrWEOJx2
4ktzd0LXBkcXZZjs4SkJnOmNpBs15ntqnTL3TrrG5ww63RizzMobAa7xWwjO5I25
pE+nN44QlZF5h9tEdThL5opy63DKWdkU3TAm89kcqj440e5Y6Cw05JSg3+Ay2y3o
/bUH61unAyjAzMDM9BuT6QeT3ErPQEYBoGxkZ29mYw1goKdlYKZlAmiS8zuYWRoC
GNgFGeg5NCkAcg56dkBXgKygsICNNdDIGUjxW1TMP6MS5GSkZ2SgZ2bkYGBiYWVk
UqenJ7v7+03y9z0isnY2hg4GRnagrpdvfSICdzYD70wQ1AMaAb7FeceUsjH8/fU/
elec7YyM4egBTCxw9L8BwMrCwsQCMAZ85zGzMbHdqX27Y/2DR3/Hov8Tj4GBjf3P
vDuAfv/2Rx4TG+Nf5JjYmf+cxl18f+HRszD/lcfOyMD6F10O0A/j/sBjYmLgYPkT
j5mRmeXPPHpmehamv/I42P/CY2D+Gx7Hn20BJcLwZx4LM+Nf0mBh/qv/2P9q893z
svzZp3e++kt8DAzsrH/hMTKx/9kvDIyszH/m3fmK7c+6TKCy+BceO6hj9w+8u8cF
FbM/8diY/uwXZqY7/T/z7h7jL3JsjCx/tu+uTIKq408e0E7PzNLI7luFUDBzvSvn
LAA6eRsbIADkFVAFELM2tgF871qkExMEaAC4mPVZDfXvssuI4a6qGeizsrIxGLHq
Mevp0zMZ6hsYMPDA/XuR73229sC7Kv2tIjHflVgOOBISIRlhOFgwXjAwMCXrF3pm
dkaGACAAaGQPBNgYA6RtaAGKdi8Y6ST0aexfGBmYGZsZAAQE2akAigADI0tLe8CL
u+psZeNgbwQGB0YNDvYH3N4B8sH38x/v/L8JkBt++gjyjjjBUO7+PwIDOQcc7PK7
xG01GPWP+7A/FX/g0Q/6M56BPQQDxfCduL7pw93Rneu/xfjPAPHj/kOA+10I/3+g
8d8GNxjOt9RB6f8EKC0QQPfTwES/3f8H/R5/ju33mn8HHjDob/dB3toC+/nsPzmg
2EExgHIA6o5AsjB3BPIxKEdAnoW/I4Q7QrwjpDtCvqPveQkG9viOUO8I7Y7Q7wjj
jjDvCOuOsO8I9KS4d/TkjvDuiBcMAPY9RVDK34oHNEj3u/2geyAe37f4FfX0HSz1
7AB2RvYOlkD73+n+hoff5UG6P/3E9z3Wvxf+meX3Ev6Z//cSBjnw3sIgT99bGJQl
9xYG5d2/FAZdgghwl2WgTAYJgs7fhUFuF7IHmll9+6YCkLW0Af6ThECF428SggMA
wP4qDCpFvxeGB/wLYVBxu7cwqFzeWxhUgO8tDCrp9xYGVYl7C4OcfG9hUCW7tzCo
Nt5bGFRt7y0MqqP3FgY1BPcWBrUY9xYGNS33Fga1QfcWBjVW9xYGtWr3FgY1f/cW
BrWT9xYGNah/IywMJnrXwEA/hATTBRXiX/iFX/j/BUDV+w+NwA+AGoH/BDp3X1t0
wEBfMf585++w7/V/6/mnT0DPAvoiBjqD8OOrE0juPyJQHKPfYor/Fi8IOd8+C781
tGDfWuFvBLqbC+YB9sf8ubmLBPQBLgtw1LN0MAKQf3/ZpPidyH8G+L6n++sWrrx3
8d/e3II9AiUMwj9M+GngTxOAADvQd7of3P8CmJTsCrAYH/J9NwH8b0z4+bH00wR5
gL2tg97dO/cP/v8xivRxVvktRn544cHfmPAzM36aIGhmbGxkZ2RtYATQNwI6GRlZ
A6yM9Kztf4j9z5FkWdpN2uDzwwsQf2PCz3Lz0wRJGycjO4CBjbWxmeE3QyzNrMyA
P4T+Ezibk+K/ozT+YQLk35gAet0A4acJSi9AHRn/RRMSeGaCM/dDf5gA9TcmfH8H
/YcJwv/t4vha1636PfjRj7IA/TcmgF6NQPhLpRT+L1VK8Z2Wml2r9R8mwPxmwvvf
+jhAd35K/zTh5/XPCgvC/TR+1i8Q7qfx+7bpfhq/rALhfhq/rALhfhq/rALhfhq/
rALhfhq/rALhfhq/rALhfhq/rALhfhq/rALhfhq/rALhfhr/21YhAkDvRKBeZBBA
qf8kYrDvvfjkd8T+4xrEB/FAAHVTCxoAaehoAI72tAAVRS8IWHCIB+Aw4N+fAfT/
5ys8KAxKFfSG9PMJP/NxeINsBwdb+fYMn71hwZjB/nbQWlYIICUsBgqBhq7v2EA7
Pau7t7sXNvZmQDPHfzZSDfXgj374fxkgN/z0EehV+ftI9f4dFxzsPiPVd5LfXij/
jGffpEH4xyj1z5G/f4afg33/GKW+r8Z/G9w/ak/at/4tUBhEv0aQwf4HwqDrewv/
bJruJfx/0QgyyG7Q+bvwrxHk73j4awT5d3j4awT5d3j4awT5F37hF/73Aaref2gE
fgDUCPwn+DWC/K8JFMf3EeS/f//8M741vz9wP42fTTcI99P4ff7fT+OXVSDcT+OX
VSDcT+OXVSDcT+OXVSDcT+OXVSDcT+OXVSDcT+OXVSDcT+OXVSDcT+OXVSDcT+N/
26p/jAKBUv5JoP5XYrD/ZBQI7g+jQPGx6ZY+X6z+dhSIg++zN8h2cDBdsCd3zKjf
3QMBNGbx+7Gdf/VE/02Ag7puwXXvQnDfnvm7PyHAH34704JjfTs/uHtK0BkGHOKb
txAegEZTQCH4bxkC0hRABoB9+hbjT498P4M8+g9vA77x/g6gB/6eVxDID3/HZ/xt
1O7vAIs80QAGRiIrKEzDQMsER9K2eri6nfs1bbCtA+7nT71/t6Ydy/cfp/67Rex2
NWfCiEUeeXz48K4TX2JEo6pRTPQhHbTPq+IKX+pXLt7NFrh9WG4dWPEf1pNQH6lV
FextTXkUDxZlb270fHpXbdxBMrMQmxq9EKs0Ve4w9eR09UaRx0PNU9tTo9H1WjP2
dMBIi2fBgF9DaTXz5rErStsA3C13lE6sDTy1qeVzq2DtawysRlfp4Geth7IPTJFg
aCplqNcv1WlhWvj32w79eptgWBtXYwjcz68Nzg+01Nhuyim28+Yc/UeKCmRW5wzO
t/bC0GYbaG7lLW+ACvPKMzmz7rgfncCvaLxtHjhfMKZ5QcrOR6nftEqlD9zUcctQ
pXhVU9yqz183Xq0gMZI0o5PA0E4/wRRKCTYYid7VaxGqqamj2K6lZQtcaYLxuG2k
CGnyd45Y44Iq5NYYuA1TM+PswjAYADSJrtjI+BtPJH8UhGaszEqiD1mrjrTG1xWq
K53ahUuA5uljJ0Y0OxaafvVcNnHVbTDHjCEOCbb99FbGitY1x20lU3PhKiHRm8Po
UN5p70v/yizdYb/+YvJ+3oA+09jC0aW5R0uL8g7Ddn3ZJEL9iFPqirWKi0kJbGuW
00miRAeZG2+fm8mjrWin6fnLsHm1kNNpp8EcGz2FXammD0PGJTdt1e+kyLa5TUcY
jCpqNpIdxXlOOkm47SbO+6fP+znZ2RaamXg3Snk16JIS14FTbnpICa7GzaFOdtae
XyTb7HidBo4yh/qlntHYWmO8kH43UH/k68Sofzp5ZZIxkCRzMsDjvN4DuuizXyd9
MtTftxJuZbVOeqiZne/RWMMTl+GFuvtx6DVS5yGKFQ/8iVXzKcJQNrcAFQe7oF7J
iXoPQoU0KuS+zzRDmKzKjMd5aMnNBaJdXWsRh8OnrCr/qH28sM6cuYr2xImp0TrK
085dJDvZGm8AU4N1rgkCIxRPlM1bqLLKNHeU+rF3NGjaGtUvQxhlhG1n6EtJ8axW
0xqYTNriZpnNSj9eGRqvxiVV29Lzxr9+KOlo+xbBh4cjUk738L204UOu4JqiZ/3C
G2Eeil/ON3cJCT9Arec+izxujE1tPt/sN/awdNt5ydCQ5rf+HnVVa3cE6Dugb5Mw
4ggDT5r/Uk+pPI1kp86HE6ST30f4CXXye6ibWrPtYccRiTKF4Bd4BUAbSW+1Bn1g
90rk4Hn3iyQ+q8VDYOkUnql6RttHzwv5QJtmRLmn8bvQ8Nai+x0afW9finvaYxsm
8SU5WT+JavloljeZpAqTZCNN/ImVTHk8gUjcKE/cjizoCAN3cfPVhP1o2gdE6/dE
/ZZg3GjQB/SDkgvuBugmT+UcJb2rST9/Bn+8/Mav24TTEXcMJ4ZV6qZqbg/I5xFt
s3eCfiMlXoiCMRkUhIPNmHPmpGi+Cp3Ca7iD5UI9nCOTxvny5OxJtDoMDMKpexIU
ihsfPjJDumM5nNWIC4uAxC6QxhEfsAlZ/spxbFPVQbcQi4NpoM4FEdg0tz+zpThe
Z4sIVFiIcrotn6asoVOML1LoyOcvs8czZ13lJ8lgFtMnBkdLzJSc6espV3tcZy38
BC7SiXIQw+NxfBD0+8PIPExyix3HmcrZK8qxLAUl8r6bzSYdYSPMio3GE3vp48WR
jBTdar9HCsdngkdM+u5pFy7vndDgFNyJytvBaAZRaUbr13nzPCe2CNLn1b7m0fkJ
Xcl6uCW9a8TO55kx0JUl5VydWEp9Kwc3hguQhwpO9wTKnHZQe3hqIdQ+2l4VtGQq
h+PE2+1dZTZ3fJV0clxtWmam0t09tZ9NZLrgLd/TTUy/18nHaPxoW8tQ/InmikM5
/g06H+PJaLSzJP6jiqY3/laBTB0yLVIXS94F5VwwS0whqbgiqV9X08IPUoW2eY75
lwcojyeloqYLFfMmnZReWj3f7Y6mFHsFWd998iC7P+DywKXuJZeCD4VIlCzH8bxm
5vwlxoM57djjI1N4hYp0lmSychUq/5LRrAYsfBWVyP5ZYycfD/wU6yBHSuzs4TBR
SWad7GSOUK7onNHCwxp9pkMO3jjlFPbBjGd48XqjtuYkXh4hqrX6BK/N4kpevcoR
XciXnjG3m91R2VKsP00gJuYXgDPUefCIiQFYLCpNQMdl6m3u91guJN19wF8ylP/j
u74yDk0U5ExyVB+1eqzcF0jRu8KB/SsHKCPHZJIy2BHLkm6qUlZHF8fxS1TlF8eL
FP2ANz1BiBnUoW3NXwUeyC/6kSYdTw91qoV1Bd3MQ6hG57QxvhqeyobxKDgJ0wcC
tPhdxtkCKAkCjZAzL4pTzzoYKLzOa2HO0MJz7HmD2+xEddsuep9+oTCa3JbU8ZBh
P8JMTX0qyGttG/gU/yquQB8/gG/92iqASQ/mLMLPl1dzQbaIZbOf0D5ZZOq6LNyP
Lg0yD7N92gUxVRr1lIcEkc4kPkfE3oZBWonNUlJf8HGc6RnJHnc2tVm1ii45Iw8m
i6ZlKQ6rSdjY9VxcZ6chtgyvlBZ3okuQFfbLSX+sOPfphXDqNWN6+tBwbLAh7Fcm
oYshiSoao3gJh3uehki7lVYnx+DRbAiIdLJWW1s5WGtz8N2YFXtmbDSpJ3zg1U/4
HwQ16JRPycBSKau2JgILt/MnqxQcw/3mLyqKjhZ53vNIhRV5lKanthgO0zDoaFvO
m0c2OzCBcUr/f6S9c3Tmy9IoHGdi27Zt27ZtW5OJbduamBNnYtu2k4mdfJPZe99z
zj3vXe8f3/qtfp5GVXd1d61aXV29qma2p/V+phPAOutZg6FCtwGk6/Wpo3Dj7yyI
e35Fn4N+isjQk41SORHUoaCde/JpX5EeVXGGqpxVP2dKLGI26PihK5jGoG7vXivI
v1AuFALsa1kbIrSOY+BGjQxDi2JzIlFkPmwoYb9EwRflNYfAaOieNu7adrXR+tP0
42hEhjR+7LDJWUpm2am1GP7+KYc+kHmfNThegUxIZiBzIzaSQ9pWP9LUcRl4tlqI
mJkIK1M1VQHCWo6eTRkDDiVJLpSk1zQE0qmJPzSc1XpLsWBQysWau5QpN3tYsaAk
pz1/OmB4Q0Td/Lb7x8x8Le6NYIGZOvwlmVeBGIx/v+ikPmcG1wa1hvUtdHG1xa1+
a32aza20FgPPvXWB2Qo1hrRZAXjV4EVfzXSAfmjl0POXiCWWO1u4FOJCs3pd460C
gzXco5G6uGKTZ45TrCdrV1zIjErSvqflhfGaYzC6yZK99g9CQ+iLQzNPDH1aT4xZ
WLKhJMoq0wkRBlPYtG0272XHksUIr9YJjHF4vjGVMzXnEOY0GSRmlS9lgDNJCzP6
HupcpZjY1qy3m/koSONwehrwUGq1jYLegUBYXXctNkHjUOXWoPfWXkRAk1ee2QZN
d3t1WVosI+Q6YOoN+O8e3S4oSyEPYXdrD3DjD1mCkx29lYedFEc/3OpuM9+rGcHk
vUrUJnvnG/G910XbfayINroaETjt8SNUK6PclRYW3NVUibaTMcPAvke5V8yL7kUf
MJ005S8Ku3E0qbhpPlkBhH6Eo6qc+9DMFrm0GBu8ivD3TI/ZAR04fLnFwpjHt8Yl
kFPTjcs8OgRj2nsixSwj0FkqnJqCDwLNc54+1SEHcZxm4a9apMafVEKPdL9RGJMI
bn3JUxC4DYit7JjSJbJ99iIMhJyISrowe4M+B8ZEaUAm8jyF918vDBvKn0oairqx
OMPU5mTLl1+DdqUMbtSABC9TXfCs4odVrrCbkfY8TASOgjQbsNFhicxpQWJhh/ch
SsfWTwDF3TYX4P15Bcop/Cu4ZeIn2+OCyzZMZ5mD/7lFfxAo7rm9v51rBBQk4/mi
RuTpEihairjs0eHSHWqnMP19lpQU9/U0Yo+UVPx3wufp+JYDxmhf0+dfFbTa+Vn3
jAaoT+gvveTm9toySUuPSWgdJH77JqKpel7TiD+pvtxU0GkiqunVnT0QjDyN0gHn
TxHsW4w+gT2jJDk0sKtPnXnICUNBY29abI99oT7rrvNCcRiHdmmr8P1p6g30W/S9
mmAvfKDTpiuRgZWQ4fK9wHKMwf8UCPTCb6fawSrdxJxGARnKDrCUebmYQxKTdT9z
xBHCsTX4Zo+y0+MqK9BJ7/dmEApSfeYm3KFU0NuMJfQFLsXy0t9uAX504+vjbcKQ
/McvrElDv8OcOPniduZwInR+CVST6Das15MoNcLsznripqXc05hzeKNaTsflRIuB
gJLEdd7i2kRsP7Rm8pnRHKVKMvhCcD7DN0eDnK79iuXpWQ4CmzuxmFzny1w1p9B1
GsLxr8DdhOwjXsCu+hB0po/bxT/6rJjYVyajkn6esjEyC53bRUFi4gSanaDnzyLG
ODzUUz1UooFqFbbec7XrhTheEPTqGiacR8AaDwDT9fg113wUr4kgNYq5vYzQ7LuG
2mi6ykUlxQYODxsTcoTt6kLu8RAbXDefwqRu0xhF6c7juHGMV9O67EOt7gpUOxHh
dkcplU4LG0ydrh39MC1VKVcQIKqsdnV41Crm5D6hJsINALXm7dKaJv0yk8WAQMUS
JhyJeoaXcQx+PKE+VhNNCT4vSqzVU2U0Lx1OdYcxK61nSj5b4+mAjQiPzmD9RY5m
LV7ZMpVO6sY7bluq1/KrvXj3KEgX8UPn6L7jYZ+rDPgCBFu2MJUHYVhrdaq5y88o
Mp59SRYGdmL9vll7qLTXBVmoGpr0UbqrQCH7NcPHI6IVxbwcGTkdXS3aBHBF0OtI
vGkJX2FdwlTnb8GEmxH4LvVj+kPje885TrtY6Dq7gTtzLdBRlkMNRt8IL3M8ILPs
HaN8GyQW6jqISjbVkcSMxwkBrArYjdwPLrY1GyRZIDqqTM+/p+UHu/3qjjk57s2Z
OrVvsiJIgRrrJ80qWgZy8lPOnGdGVxmQIZBHH8AFnWfilOmeSEwm2+8FfBkRSXQR
qPuyCWrqBBKs9BCT3O4eJc7AWDFuhqp+stNPRBsKYo17s4Jl3UMNOGrCGQDaXw5i
XaPPAXhKNafEMY5YExGJdoUF7IgbVCE9wUo4JqWpOUOm37vRnVhT6iJBIDlAawFi
wkslZDWcC+baBJ0lsSfgkfNFh1wYbkh07GefKBS0ai17immbNTfKDGQA+P7+dKNH
dUF928Li9JvsRa5yU2IZuc1U7nnyUS/bEI/1IUHfmDAGTK6A6K5U7MrVGjyqgGae
h3o4pRIxe7Q8EkxenuhzgmIWf/+PgobSfR1CrEbLhi3O+URAGhL52vDAnQ+PnVQA
C5mt2vJ6lbbdc4gSo8FSfNvJnDc4oAhNs/92zfapO/9xocbOzPJ/Ag78lwd9eQOz
P7+Onw7t//YLpWjiZOfiaGTihM/6t/u0T69sts5O+P94TjMxtjAQtHPH1/p0yc9E
/yfpQP7Lg9on3r85YzNSMnHG1/qdFRb9Pa6J++8z0men1naOSvYGRib4n2BCTgz4
bH8P58SIz/5Plgn/M0iC4u/O8elE3J3FlJw/fbZ9Yog5MeMz/E2y2G8Uhr+pE/vd
E8PfNwdiv/E/HaH98e/2l9P/vyav/Lv+b4f5ysq/cf92g6Ws/Bv3c1J/4P81oT/j
/OfK/YsYOiMDfHpadpZ/h//3y4z/CZ7h34H/2ar/FzD9vwP/+9r+j8C07Mxs/9H9
57L+XxcrDH+vryz+ZxSCz9sV2z/4wiauFkYmYo4GHv/7rUuRGrh6wiIm74f4T8kl
JdGlIcbcM4w0QGM4AWVDRHF0ArBvX1vI+yEXaGCxUWjCFRs0Echp53ZybeVPW+Sl
QItQK1pqPCchcqfufzzwTo5/YL8/eJt5n/Js+gHw6wwlidc5APBHs+thIo7KZqdl
/ixcB4bkRysFEssd2d+XWJqeRrCHhD8MBz3iuXqog9IXd+wFPGdxOOu6J/cWwIWb
4ATVQuCLSQEGOIABqIwhizsAzjUH3D+Auib5EiL4PQkFDwvAgRIAkrLAKg89NfBL
H1BZ6CB0nGNEKsFaJjbt7PJ0GgbNuAyayUfAvPn0x83ocDJB2/QkCGtS+/cW+0fX
wPuUqx/+X9qEvFMHYcKx+mOghMPi4F+Av2ZIXJcMCmKDXXFrqAJhGXqFns4W9UDA
vwh6a5FDibhjAgTK1tLzQhgahfb23RAW4N8Hqg+NQon7L4HtYOZ9DbgGMRLVRt53
2iEIfg4tmVlTZ95EBZjJoPsCjRmXcKzxY3sIjIn8g7YaH3Z4nxUNCjg2Sx5tOWkY
JiJ4CXIH7dsZPDPehRBD7J5YAY9BDiL5RLSw5xtBFeLe8FuQj6RaJz3u/hgGQLlG
JzNuZVCTwu6sSA92aAABLbKkUBz2sxQPwXDyDfRA4LMsZYRIpxCeRQ+QA1A4wU6/
YhUzOYghOpUmlXhfCz+AYw/3Ywp4Xy44vQAuvD8QxwiAdiwwFpKmPpzWl0ySYBlI
sz1/avLJry0Pu+wnBSjmUSDRe9+c2ZmwqrASGAHxqvA0Qu6HgmDupjp9rn08Cp6x
8zoBdqv9oaOhegCw0QSZgZ1HSYKmOrGX4L4qYmCPfnVvRzUbIjKDp2l26QNjjm64
jbEcDqJ6dNQhOo1NIWoC5c/oz0WPJljdy05oJY7IhMxAwxB4jqX+wUqRqQCCvedo
98Na+pRsMs7uDa9xIqQp+sHXu33A0BtzgArvIhOGBzlmgAxO8wZ2JYul9VmJeR9z
EX3Imji+XIUhk6PRMSLuckzxWBvhcuSk5yO2UW4Zc/aCnsBOYdeDwAzyw679ayv5
IoUaBRw5GyBSp1+es+IzfqvUD/AcLrzzMNxBcGSvPmyEV6pvvNEM+oEa3D9A9gmx
eMnp/JpvlCZE759GYdEJFiPYR5Mvv6EnA2ONfOfPXoQvzYG6iQMvoAngFlmz/xqJ
kdOGQLMry+8lUYGr71rJ7QJIfzqfPjnaOFSwLsFatCFvQSeBVs0QK34wlwwNRZwj
qoALMkqkJ/pN0WuBYAHACq4i+y7zbmsWeoFmwe677AIt+3Wguhw2STTSuDDUNGBq
zaJgJmn6fmm2edBkM96ijPHjEEf6kH0f2wZ5QVzMU0Em5uSbA+7ILgsqDbMftVJa
AZkL94O89yATmMmZX725tyiZamDc2ZAcTm/mdl8ugzUGLTQrsFHqz8G0bbg4jt5I
hJ6poII8aCtRfKOZQffITAdjcM7LUAMjl20lFKngAiNp/ncIArjC6/R+nLuHal5G
MvcwynTz17KfR7+Mo80xyyCMOAd3KM2GAhOSAFjCuoHMQ5AHULJcGb6TjEE4yZOI
qnxhRMwgmdzmywSZSXUm5KhhFAEkHSbVEf9QiCxPYvOWr8Qs24AtxMO+IwGWcFMe
HPACcMMLQys3/7B+e0wgyPVUrCwTULZ62nC8LPWfk7ek11fMis3kDMIEqwVPT6Ij
D3SDAwByJBFRVAimzxkObsYGTCA64FhhytKQ/XUafCFtDgswabTnRiBdEkCWgBo5
JH6bD0DinjMD9PuIbgnbtQA7RcW2BdqVJvALFh50R4AxFfgN/qe0pIGxVDejPCxl
D2YNgjUoVw+uPDhmt4E9dMO32S1wewht0Kwt2tfs229k+vDtIL3owdP0nMVhx0ak
qSSmIRxGF6l0qIEi+rXqjMnBJvqG0sFJ+jkGSUuc1lRNUBW9nf3ptbNLoGeYruCn
Pc+1fDXN7P4VW5otCLZBcj3rDqy40YO79VfQ3ry6kSnbFb/G3WF0Y9h2Sq6k3Mk2
ovh6Qr7wkyNxBlJs87cgAQojxwkWIikaMigIKCOwCAN/Bzzvg8nPQMffiFVWTDCO
h6WPyDMGGiY6TIgYTtpTdcRbFs8msYvl2cN/yhYsQVc8I89GhjUhJQmo+6ooW5Y/
pxitONEDuS7lIVGk6KLvu6a/EV+WNhc0lzR3PhcwpzRnNRcyR4AZVSxXX/A0lW+u
rclbmdkUpCrHJdEme1rUoSqvSq9gr/pFVVwBniqRUpniTI09z15nO+5nTX56flF+
iWEioV6tuEPjDm4/aj9VeEd4r+SJ5IIkr+SVZJrkaCIrFQt5llJrya22hsay9LIQ
h6hGYbuyR/01wf7NCM+InTKzsrUKkLKiijFlhfJ9eabij4LrTNkSrem3Y4pb72dK
T5w36DfANxahhO2hLfrHSJJIS1GiXc7dsvL88iJKLZdoy1rLpBOEeapyYMtwS1VL
QEvtxn7Lectxy+a54DmW+ay5gjmnObXyS7Wu3I0SgdmamS8zW1aJFmcL7AVX8glT
zIvQU3sWvsU/xG4yTatRVUY1IwqSylTK7qIWTCoFbGDOLVbCVoJW5lcGG9tcvuBQ
4UTLNk1YZvVy6nDauUQ5L7cCraO0wrQuuugdy8zcLCIdqRzhzJ3OeVVMzsHNTM7o
VfhJf3QCWuhbwRvVdOuH9HAE+EtoJrSTXpGqSHNyH5MJrU0t0C/Y523b9sL2EhAZ
FcAThU2jFjCJAg9wDrwPpA1gRcqhP2SYpz+mh0qzpmYye4zNmdalLY+Nj9WPCSgJ
zcorpR3Tzo4W95oumEKYFpmCj19kUKW1ZZRk2NHbMeE10NemGigYOnTvkEmJSLlJ
5e2TjrqOqqkuqEqojlZGa9xpnGo4fY+ohFPfrM9bfVweay6r/cGRxrns47iwd55Q
vbLTRNskuGq5SuXaklWRNWTbts7iFd4R0rHUOfCeHBAOvJrXvf1VKKYg2ijQqGyX
YbBEibq4UFqDq8hnxCsZigrLd/2C04I9iCOJs5H9bdv6dMypyrWTI4mXxf0kvkxG
KUemPoM0tcloxQZNJgWDdlRnRfvd2cUpqZW15b5No6Xoh41T237VPu5558xbO3i/
UesgYoxqDFt2VfZTdgiP34Pjr5Hrlcv5Q5tzml8bu29Tg2Mhp/WjJaspxxkHL0l2
zTlleIvVA5dmfk5+nX6VH0T3xq6kbdlvzpxWrc7P08fVQNzAqKCZkMRAQkBUQHTg
FiAkIDYwnvDWqJkI3vju9H0kxgZDZfKS5u5HK1Na2ESwMUqDGNBOUFrIrqzaJNy0
3laPkwhNCDOhyRiPkTUYp2ZrEQ2RyGK4EUAKmaV3Cg8FlQWHYn54QlFh0WXRTywL
FE3ETTyyTLa2a+8tKVezu2qDmzI1ErEkDSTlpMWkCySdkpDSmilzPE4jYyJMdCRY
xBHxGYrmFGEUjRRC9d9MbTLnM07iNbNXWFY9XbfPoJygD4wnOXjVXGjdLuKYJTUV
V94b3NbIbWHczHHNNpo8AtoBNkg3kDr5/IC79LaI1MncEy8SOmk76HrJjHxEu6bk
1Emw4UFDm8KzTYJNL8a8k1CSGtlOhVwV73uwgzIbMk1rg9mlvFkX2ZvpH9L7ZBVp
j7MvOfx2XwUsWhpY4UYzshYTq0E/es5il4d4U+6QH1GV0dp1Y1u2xPM881pqCoaa
zEWmC3a2dqrR4qE8oFYlpaWSk26pDelWGtG1uO0cVhFvSEykPFOCqdebpS00Furw
pDSKTiX1vJNvNaTSFJZn6kJyQrx9czMVaGm6GtesnibohuiE9bR1GVz6k1EuqR5R
0Kg0klSSLlWvVXVfZ45Hx/V81ZM6T64tF+e5FuQXQxedK++02uyynlt3XOAWJ9U3
W/x/5Bn2RkQ5semWpqs2OiXMkC4XX4wjZGQ0qVtr1O+vq24vTJwcz4M3Y9hq1Z7P
u77fn3K9ujGfMa9o/Lg5V8uvtr2EXJ5XN1JRasxobdN/qPZCfGjwO3930fktLUzO
c7z6vdoe+i+4tA5V1Zo37T9OgB8Bl/3fn+eeKzZBfGfntqZqTnMnekaEtmLPpnbt
ZjvPObF9W85DX+KCL6m7Vl2Vb8xFiBbU59jdpd2/t1H8ONZ0UnfSilAbnb7E6dpc
tVzR9NF+eTxBkiQbkfVm1/B2PErcm+s+jpyFWz1oWudhuhkbr2cwo8uB4nN7D9nC
m2ioX5XLfuDY9Oy5EbwReYgYpP2ha3lmf8z+XDAaI0bXpmvbvuNadFw+OJ9stbEo
q/3Q5vssuhWFZ+toq3sSeda+kDTl8qJ6Unmx+rrq41Z3yf1StlWy3Sa1TdK507ny
Vg4eDGf5zvKkB96m0xbzAHLv/Ir9cLMe0h4i5zv8sq9jt1x9q1eBm8Zdfup0YXUO
d9H17L6wu0EWT9YLvN9V9tF0XjY+e+n78NFhZH+gf8l0XA/n99276sP7MsKCbiU4
PwS3fcyD47V8p/H91MdubbOhS8bzxdy9h2ulbdxP9r1+3+fxxQvPkdf7kY1G5xf2
f+vlf1SvzwwTEyvbP5X/qGi/lWQJIaHPsH7G+H/0NkV8nf+D+E+0wH/T4z6dhv+l
xzH9D3qcopjg/67GBalohWKpoL8ncAxDtk3MrszTFAp1OFO0STWhrBc1pGslNFhh
1i3PowrUJyQYj50RT0jPQPlQftuJqOiUEGjvoPnybcazZwH8RbFMXtXtlJCct8Fd
gPxWpPmKK8GYVMMyw2TS++Zt88nuMAcj379RsKPqBSWfpJfVabj0em3aaKSb8+mY
ALNQAZO6VJUnfnwC0VeQquqtS4svVo5ejezC+lLN7gcWtaMUyfU6eKdqwxzJFpKw
f73lekMYWHCPHF7zKVAEdrAM8ZfX/O591uCoYLTVRxaxhMn+XA4o6ookQQR3UHfv
2hC6hy1XWPluuXistTllkVtCqwXJ9AkcIa8fIT/EPNhaCtnk629W/V2GyidwBlyg
G7sUqftAs0F0FaDCOLbEvlazNAZJg29WrU5j/zISfs+KOvEGcWezLzfGzQQPxuvS
sChsfcxSSnqt32r2/xhQH8M+PtNRqkT3lODq2az61XBkFyquyMyV9Rv2+KvGKASP
Y6ykCK4cQAxwl24lDipHd8lt2nwmUvuQ2bkyCek18ut+CmRIXXdBd5cjD8VtKMmb
VnN9Frb60BQTIa1hLXtzpud2SNCZJC8orkOabcbThG6T9gxsMdezHKWp5C/Dy8bW
izFyR6jHcVHZuWh1/+FvaeJAvWb4o1Ee03L+GQ1bVPAlmDSGKsO5MorkYhLhO5pk
SMmIFoUB2zWO9NhuOuOB9ZP5lO5R6dHjP9NdEs+zdCoFTWrAdNwaKPsF8RSAsylv
wZfCT5Xy0C8wt0Y+dkuyRqOiczCxDAya0D5elqhXJ4uXoSnOKO6Zubp39M2WeBfd
UL1aUcK8bfElVydHQ4dw1oEsu0IxbSj130DDMTWqQjqrqGNYB7hHMW5AZTquBzZ5
OmZq6k8oSZ85Pfd0eeBeUVtw1ftbcZfsfcj9c4CwHrXE7No1LbM7Zk0cFDFlGxZK
Vj1RdVRAkk4mJkicBYTG20sOwnTxUmT9nnLRbJKyvN5PpopmSYw85oxE0B4r0rQw
OJkuarfxev2C1Xovg/igP2g7aHwofUiyUnhTaBMIdWJpJfWkNiXxpPRantvGY73u
iRnRnEiuUWfnK2uaF1PVOSjtUvCSd69hnxQ8FlQorkO5SUr2dGqs3SbHM+yKmh1v
98nzXV6cDtV3NKa15diBN99SAcYjltiAb4bUC3Z/WeRvGm5Ac0LYXCYsloUGLSFL
2aVdWDDc6Gz2CNPjRsYiruFkQsiCwkGs+SQHtOln9KQfjcPcbFM+U+6z8hF0kiFX
zMula/4wpPL6uU2W9IXXR1sC62SvRXHKpZ9BI3yYxpbVwyG+z03pjKg1zakzpNNG
jXvCN9j8Q8/9wefSYRBTmAp1emgXly3YbR/4EjHLS9AmdbyJ7/qpk6hO0uuB/aEz
j3xDj69Zk+0KF8s9wvxmXPU050Grchxuyy/g6Ns7Xm6Ot8p/i7U/kuiPmKJn4/in
8h9R9x9i7c993r/EGuP/EMvyMz7C/0+xlpXspqy0jBoy2cHWMYVIiE9yi+kJgT/D
JY4CohAm8VUeKDiQ1FUYVBQZgULVWLkbUCyE0EgEGSrgm+EixDW8/ECPgrDI/nqk
FcRlJcvNRvrboMbm8mHz4rLZpc9iK4D86zeQn87qgF+Z89SRL057tBGRRvsegNDh
AWHVAbu3TU1BxB6FgeZeO3jS0krFB+rvL2i/GretUnfJkzotfPjFEbIJEYMBQIrM
s3L7kqLtAyUq1fdjMH6AjNwmUTAGMzCi5kHkfyfc7au2vi85oGobTk0h3cvD1JjA
aGfOjmyT30gn2S6IBMnTTiXZMivwBjfpUJZIB9h/IJ+dfcyUBqBHTtMbOyTNsw5j
FEHGuAi7BgL4ktjH0e4IG/HEYZ4N4F5sthcOEiZhWIywmGqxfzRk+nxVr/RkyECV
2CuzHeouPXnbAB1Nj/a12i5ZBJBEwybNPO68Evv8XGPhwPypa3kT11fpjWfI80Xl
ivRsMlsgMltj0/rsO10HKsA9sWYGTn1nkgpAgw0Y//72d7lLfIBrUICGjcwb3GBr
3fi+HWgyqIizM2snwBwrWqojtpecb3YjXcEcD2mjFy+qXMVofP5EEihMJiL7xSXF
UsJjY9CwKZPGbw/wH7vdHBbjw73UmTndaFdBRyoKR4kQgWHmbUHc/uqxtMaQgX7z
237orGTgGL5ZVsjmLnoAPkEc8i0S4EN2PABCRMDEtnyeQD6nWvAMkEOd7eaVcdVO
MYye74fPeFDa4bbb0gKESgf30DHGjiT51BgFm4HWPUCIseDOuZDM/rT0QNT6MNhf
meyBN/ABAr+KwwMnA9OKA1nwg9QJ8C4BQAowLAG6BljaA8z5e06ByH5jtQfTBlHr
hrGHgv4qxg8Z3CNFD7jhb/Hl2y94lHyB8ljUQrg0wQV4LM0vHkIC8uzIwP1CYbHw
8fxPU6Sl6JQB5XlC8jy3RM6YrV90Ap5zwafwmcHeAH0CEVKBZg1glgCavi7XcGF/
Efs5uiXsjpIJjta9ui3ZgsoL2/wTbRvrFwB1kN7PhC/8Q1+Ap0XVv2BdCQvGqhMD
IhBYxREWApWJpMfCFmL9iBKPc9gDBgvJM0hFRx3A2A3RiNw2VDVYMJSkn081SlWV
RjtgNYVn8n/6VmQ4X1usTvadzxWCFSEjiqZPVT9GX6smpRZ4yeCMCxt2sBtjB9ve
twVdm9GWpQqkGW4xsu3raS/MNumVezvlBvLlN7gep1+G3gSdkH7YfribMXgDXWSx
EJogVt/gCJLxia2JleExvxx+eQtE+Mms4F8q50wYDO/Rp21IURu9JNAugU0qm4As
EUyMpkhMkdbgryxhSahDykPaQZAwzGks5oiuwa8rV0Wcg69HAhfPJ59IToosJ4kt
IrgsyyH5g9+D30OoSBGm1HZOvTy1NUtTrkPYR9KHTiyBKeUmZXe4MqEizirpNMWL
RC5xMcUtRY82h0yPwE/yvfi1BUihh79Hyb+gRjVPdLvhJ0+QhEh6fpJhqGG6YZhh
wA5LvwJJe7x/fDOiXBn/cc0MSREBpuBskcdMS4NMA+eKyQo9jhhb4ctswnH/Ld5R
xy2ECYmJ1j75PvY+5n79iCLYT3r9RyZFjKLIhMi2yJgb5oMfk7uTq6zVFrof7RRJ
T5S2lN5JhEmmSYBJMeXSKnbzyPNZ5TblcnP0lqSWBpbLli/ztBVRkyWTbtmTWXrM
H3uvISc1rWGeLc+Wd70nPCcJmOmYnZgYmCqYKcwDLBjptunD6fvph8yDDeaaUI0g
mvuah4269ElpF2PKpiT1ERx5lVXnJTTTvIXrFTyVRqX16mYFsvUTSDrxtFpsAs3a
zUpugnJSdOp0etUKl3m8CjmVOYVdYl1afiPdU/gr+hECGT2leeF5XQbZBgXbRkTl
cRXTlAWaBVwD7EZNDuFXvLtapDVhWRLxElHDMkpLcxvK+q2TDZPQVgfmpMwVLG2D
+TVrGhrfRRdyOXq5h7wLPDKeqKB4ItQjslDXUfWoz6mVaE6p8TQoNEDVbRpOap57
V/rSrXSMfAaDLXeN6ieK1w8aK8toNl27zn240nVq1lHbZNsm72HvCV9IXxjAeULc
QzpgH5acXcnbAn3mEU6PtlsmriJ3wcm8yGpnJUo2szQmKCZgJgqgoNF+oc3RoDtO
O2y3YDvG0RrTRuq52+fNqawm7WqePo/JLEYduvbZ9K0v8Sy/tbxQwUnBxYlFDCaW
JBxiTkLphqZUq8WpVTfHPxheWl6W8HLyhvFG8SJ1unZW+NA9GrwBvbk+r98s/jp8
XnyRA2EH+Q5xBFkIIgqiCs4LxQiBCOoC0tsD2NP2DY9uRo9Yew4VSPBVyDWIG4IF
Wgfl2Qmdlpr5O+mZR4uKu6+7GwiNoYiwUF+beMzQzJBYRBSqFKqb6LBYv8i8mIyI
l0iKiFSKOrVG/Z5opGYkfjEPKh4Wihexq2PZw8y6VMju2Q7k7gUtk3Zy/dmKY+N+
2ehkVaxej4YDJS4WHs4m/EcY0s+yfemqW70fbvsgiwltIS/xhwNUh1FXOo8mr3Eg
KYF1gdPCKX06YUYSVRIoErtAcgKNWy51etf+e2WJsYkFFExl02XjFoENjw2zgiQG
4TVUOkw8ZL81feYCeqHWEYv5CxWkfP7pOGlyJw3TttTod+k78UjiDJIADah6y7oN
MzGTnBGFMYSD2730PdtRnOGb4RdfFlMWNxezTtf34Ncelgsr2MqghSrt1R+ybjo9
rdt3nacxNvg24su/RkVHo0ywNm3DN+YUchVqOvXN6y8PBgR/CCpsd9BMaMFa91uj
WJ+vm9ZXWq6mEOpO3xmO7oTvyJGsxZ9uavioPa2P3QeedxTdF724bbl+cVtbP269
UU8z1NBdnqra0qncH7vOv25uUzvrVDXQctCHs4gxjmlgLK3rkKy2FJsvOSk88ceM
ST/oOPFqPs9aGVxd7Nq08ZsFjALuB+fFRcZu9xt6kLf6rZ33G6xtf++dPM0/ae0y
89PzEz4Xv4qbFAsSKxr8GeMyzzW3yFbKlsj6Myp+oHbXYdDubetOyAup4lieqeDH
Iwg7AcfVzuAj3mU2NPeyR7hP+THZW85905RmuGbewtpCWFMhq4WXtNfm8dfZLJwJ
HBq+jA/v28j7tPT6ETOpybgJlMwMjhw332vBgaCriDC0EE41Z97Whr2ZrKqaqo1R
/5Rq3asfjmWrHS+vKikVZlUcOlw+WT4d58FvUQu4bdnJeme+FseNlzYdx/b1b8m7
ldGdoD6HzzovdBv3rT770R9ZWMARYM8XtJ1eH7prPMc+G2/T4GVwunxjnuxv5m9G
Z7v5ZJBylNnlfJVv84+LpmUdt2e5i/qT9aFmMcEtQnQfSU/Vcr2gk2WTVKINoidi
lWKTkU+R6561t/2/RiNTZneDuijemx6SpityfN1eOswMh/t+WU2fpvFJbpR2cjwv
3NscGh/tzbpZXBaXhG9UdPLd+7/lvRjdDsYdn8k9yiXlRPG5eUO8XruT2pgebD4E
3rz8D2faf+zljKwMjP9U/qOF//uZ9s8Z9t/OtP9tLf60szv9vyznn8ZwF1vnT1us
lIWxE74W/l/n3z+RlP6h5b/7FDJwNrC2M/un879N4f9EW6NjoGX+dyvwP+fzf+F/
WsPx6ZRcDJ3/FJUdXUz+avic1F+NIuqqAprSVAKOFgbWMsp/oQibOBk5Wtg72zlC
Mv5tchex/X3+/ox1TydjYKRoZ2Ng+68aUQtHJ2chcwPHzwj1dNIGfxcYfi8u3Z9w
93/my8YO+Ungvz4mJqa/Evvngv9V/g31O8fCwvq/JcjP/08sFvZPCv/CocdnZWX7
k9j+bOyf0h/DP/3fPX9+7H9ixrH9Ln+200P+C+4vLI7PWGt/tf3H939Gp/9X/rPX
v0ZmZGT8M7/f/39G+Hd6/5rbJ94/8J/5v0b709vv9B+c8N9vC/5zW/4qyxrYfL4N
+L830NrAzOnPTnzCCP5hRRpWVhZ8GiZGFnzGz9hhDPT0rDqQdBK/mcvCSMDWzNrk
93h0Ak5Gn09EOOhZPtWwvwo0jAyMn2xoL25iYWbujM/GwPqbn5xNbFTxOVg+lTmD
Txb4jAdIp/43CMtv9e8PiDj+762hE3A1+8MD+MzMDJ/M4/5X6Q8dfyj8reaZMOIz
/vWc49/W4N+fTPyjNP79WuWvIgM+IzsTI/v/rigWtkN4I4s8s+mqrPM8TDOleZEy
JUgzcpDCi/9ECC3kAIIkNKMXINzu3P9CSCn5C0AYee6OtxsLLpkABDpESlVHBw7V
lce138VAh1stMWe0rio27UGLBanb5+Gj8/LwJiet3Le1tbUt+rCqxPSpzsoMAcqC
BHHalDq9KTBULhcyZHNcvZY7naP5+cu0TGaH8UT+mMeEoGDi5QF1u6/rAXdLZuxV
81gWy28hlZnZW3upjWw8QeGn27MmMqpmOvGmZP86+7OfqW4xgHGiWoPZxuT+bW+S
PUaXyWb6u/Sb1cLNDUmE1i/cd41borpxqeTxkYUSmMBUPxJai15mB+tORSJkeb1r
4DKCGCQeA2GSfWNEgmttjhRy9sNFlKbjDTzW7DTL6qcSAnP4Zt675nxF2HZauuXX
2egqDkoGdXtL5Lsn0LUSvMTWb9Aqw3Jcvq0CKCSvP5/kNjuM85XbqS4isDnwk2J3
xaUpLaT2RO8lRRRtV7tDFwj6XTnWUe57eArJs9Vpr8mv+8W5YmEJh43LkQdUUJ4s
C1ULccTB46Lxj78ITFSLxqES2QhwRhcmOBbJazHnw9LGv7YsxryvkNA94VJEEcd9
uXYsZBBXimMlsBGYCfNsN2aYsSwMEC+JdRZOaLd5UM0/32ji6jdYfA1C2XHWPHCW
TGBfdzExOmD31D5gP6uTbgRMs+yoYOznCTGOFjFJK6ivyUeB2zSpU3WGvRfHdZ4J
CKYTkF3G6pOlCIutjM8gjksNLA5HlHG8oAxVs+YgHw6UlM43Jg0r5CJZMXVRhmat
ZX7JZpcI9BmUNa2qSWizjg6nCRCrmxyC/U0U4gv0ZlddV/z8GTue016juNbveeOI
PuNKDEbvev1uqumC53pJTCSaJ5QRWfnmDH/sRczzgvxj5H2MQXQPu0rE8GxySOUe
ovUOwpGLC/KInCv9wviy+a6iaonqq7AHaiiyKaAdPRQ7DwrOGZzNBy2gaD/DbHfp
myIvhjBl0WvTz4042OFFVSa6mZ73Jqr0UGuctQgf/nhxaJonALv3r8JxA4QsRDQC
M4DPX6bEClEsmGZUC4kRa6B/hCObXOJ3hNwiHAcVEkSJMNYQ2bjLgHOtoeIhYpwZ
dBnZIdCJvsK/VLJ3Dm4gD7ot2/Vd2WD3trzDetXTYBMEjLfI2seEF4QbcVRRnS22
QWbG3eqDc4UiROLTiZWLYAYwo1ggxUfjGD/ZMBHJchvzeYAzYxvY7Fk5eEdzm+Cv
vIai4kGCRF5T824h8g81CTf3paH6bRlkXlP7PnR8dUftsiHCz+63UwcONbsKogK4
ouZ14v1dQSYH2lf/mBr2NdalhkyXgjz8Fqv+qyj46rILetEpveSiQWIVEWNbtN9w
V88F4dl004xi5BKRZn4h80xrTBNubuWuxalSgwuqTUdaU1VeJUvDneVKem4lwQpm
cSWmzbrcixG5ZtnCe/2s5biY1mZe5aqFFZRN1OyC4Iomv1ZBQ85Cz/UKLfD8tjwZ
bBuYU76RRxstBsiFkZkH+jT3ljeu+0+BvZC4mR1poSJz3+I6vrGYpzZJK6ZDHnBl
alxvCi8cts5oC/csbKF4BoFq4CjdQSHdwd2zIau4YkIXQp+YRNGZPFfe51qJPde9
ffHG3/yvSuQTU4g0/oQrY2DM4LjRh5NvsP8bfOAX0z1n59PjQS03jRpMGcSdooVS
6EqvszQ7julb6CDwwJkzOjbOXOuh3gLehwnJQI+oK9uqsCMDQkb9oIzNx0SU81TI
ys4LUcD6rQBisr9LQ3qfBUH0m0QE+6WQIJiurojgGQk21Ypggn1GB40u6rKYzWsV
T5xfiKxwJ6wL/Ve9oHuxd/TzWAutPaHE9gaya4Gj6KHVfRywROxQN3nsexGR+Y68
97jzy9ByK/vtuKah8dcaMkclc2FjAXHt1KQf9i5QE8xext7ejnuK3Hbq5p7CVj1M
D8KWQmpiloyNz7+87oU98yDCoNXDB5ID+6SMDK66n31xnKtUi/34N3PxCi4rqqdS
jm9uEXyqeEvdMDLB5vWZ1KFJA3pymYbATPHB1MSeW5K3FCeLkH7KgQcWC6PWQMIK
cWQIyKKz0DPGEzsVKljPBRI4K9c5gWGw8KRzMxEsCMjskpIlLcGnO0cTFpDCStzL
RZ5MlQySvZCIktwZVVsuSRyvR5HL1N3hJEpbH+Va6Dp70R9jr9SkyJ+0vFXh86Fu
+qoZEV15qM49W2YFYM/3hrylfNdAZoWT0n58pP0KoUfI9tRdCgEzjOaElYCCLX7I
Gi25wUbAWWRA9+afXY7VlPIOx8fMepYENo13MnDjaDFVMzCggOMcXyqWf+snD4ce
AHyCgZ/qwYPIEsh0hzs8R9X3VqrWDVdqxhwvqFA9ZY58Zzxyem5NUYrVVA+AceJe
UCgyZ3ElSld1I0twgkwohCNH5SE25zE4O3JKDB42GChYiigaTMnML5gvGQomjDJ9
nZUv6dE0gnNYsUawQWyiSXTyCzqmFveyyognmhMNZu8DI5OFOC63DYx1IlWRjUp1
EbsiI2gus92pX1uvzsWTudVJlKgLXkby6uCY6eB6t0FjeGDpu8EwRq3BdBZwv8+H
gwdkFzc9qzVZmiJbrcEhss1CTZP/SnfrUoNBVJtoZOXJQ73busO7jorRx2jbwHWI
ypVbFPzD22Db89Uo0ePvX7e73UvMvCj4S0KgwUHWM+ZYgighBr/Xlog0me7FA33d
XfiYVuNY/g1/j86MgJfcSmuiA2GjGUSs+AZCh/YLhpZBfV8I5n66ZXnrSd3rdW56
upYY21FdRYWzUBiCsP3FJm0pb5ebYBNfmsdc86dGb0pGj28pb4tw5XMkjRa9LbY8
lBqcBsp1rmt7wVmePJIZISz51vxuacvai3EXY8j3wtsAugrxE2p7JiztY+Zjqq+b
DgINEP3oWR3yzPeX+ZqptGQ0UYqM3JaEwFSp7Bi99CaOvbxHitriDcz5ATTMAlqt
OQMvBPrxFARHrlJumr42qCPR/ddnCso2ErHCUg+xzny0PeBSxobfk8m6VxJ9+mKQ
5bPJfDlk9T8Ku4Sfw/GUbmb0rk5fhzoBC06HSAWb4s6dcZdlYeMXjyjWGgPOSM4D
K/h7h4yMUZ5ANcBrWTFI3GKvHinJP0DvSlYN0rgh/J+IOQJb1eIzhnl38jpvF41Z
fuh44rmty34nzoEmNRo2dETr4PahSROMHm6O991zdITRENSahTlum30oziGYjO+Y
sZvV6ZMGMgbrDJnZpPCT/Ei77cZ5SAgZZvCsdmCb/pWsOuedSU0UIy7DKDMp8RGI
uhd3OgWWFkkaYk4mtXVcP5QyJ6YmIXSVWDI7fItVikIoY0zrEXhW4HP0JblEWiJG
Fo8Qt92IJPuZ3oLI69c5fnV8wVx+piRfAq/Ia2GkdvB7Q8LmtCzFfCOpSoSDEr0k
SSGmGmqCXlzzEAJmQZdpBEqEYp75CMwxXGjELemd+flNyw3UM50rU2dFEdv+9jFB
X7DDj5AY1ieYJyqYKUfOYFlDEmsGL0FNUWh3Iztvs3gP9MuQX7ddAFH39FBc1Dw0
XcQ58/vF0SU2qXHsHoncsr4ylUcWiU1TWkdit3bW5BkjuCY5El2xerEfuTnBunoy
qHFtQ1J7enMSL7MOt5ScKVX5p0c8twaeobh5erU91oRa3Z0pB5JSRWr7BI+ysVp7
WkmNI1mt1YowZWyKXXJvVDpxulIDgHgLuXcPCWRT9R179E/om0Z7TOXyTI3bWEUe
DdkboZfjt7TPyOuiernn7qMIzxhvmITHObfUAYUmnKiB170quehaYDA3aGcMruib
RGda93bDVPtSEGUxykQskhHT5S4zpt5uUn5JwNcGHFEOVfK48k3kq4kpiYuJSpwR
76hDjw8TPOsqK3cpyBKVcjyxllKNJR+Sa6lC4nCp+izmb8zeh0adeAAD5/iXSlAD
tPxSx/ieHKKmlFlyKTNJ6MOrR0S3GtP3ejPA6EV8M5fTplRQYawPxj5L8KxgmxXL
1E3II0sd37N8+nzjb+M16qRsy5QxCVgk6gv3Z+5mgBUVPeWelZ+lOYmyetloMvZC
M+kG9wO5BbMp9aj4CPwo/MqkFTZUeBfTnCOcrVxwWj/8VZnE+VT5ZDcLf38FH91T
0GfeWWek1QDAk35HDhZRymTnpG71kstwSAdu3YdlxsXM6YBKy6yt2evCqxr+dYps
sTCFarFKjthGb6SrPydq/GfMOcNl8W80LseAXWifRPhZrk/3Cr0BfF5wstsVzfLY
6i9dUGfAcMowOWfsCnUdBT1TsJOiFTpeiZ+EWRXoeIazUwaAoHSTwClgiOU8I18V
NSXtCNs0cAiK64OjunepjiK2oJAsQN8UJIVgOoHU5+SesX4kUev7EZIJDJ4OBzgX
c4esyVAeU16TeMAqK+RrF1DN/zhetc5u99+fcv25hzbVZqnJT9IvYlsgM0PUerk8
uKfpqM4a1yVOV3AXskxXNH1NYcKdBQXZEvadRGrWauhOMuAVnDNE3BmRIjEmoK0y
nnKPG1stoEIaUG4V+GQDnJdeHTMKEY/+0HFLhIe9j+iRF4SXADjgwH+gGgTtBcdi
UcYYxzjasGCL89dcewamHGlJDhFcyWGs1cxDPO4W+OlMxa8+mz2nujDrguYSW2Ip
fUlf6JVObYwJWKreWZ4lsHuGjG7cx6dXwwaoshjvgEs6BqaAxDfjgFcxRv+5YrZi
PhBXtIBeXuliIQMef13fEDZtSpf4kTkUazPPlgaQNx7RgaIcObHSsDEZOmKjIcDr
77oEs7cQYw7x74BvHXFjhruzo0UaZR7oITLooDAFLjSPkzgrU89hAY0rAilz0Njy
6116OeUj4RsdI1735FKJycho/VBQhk8e0+LsbMjQjz66MatJu86lrhnzhqwYMJ5Z
hFKR8XWtS78OzBk3MhN3a6XoznsmjWbl6c/zvx0YI4v0+umSYew/yPQW5czPyTvd
+83NMbI03rCUYVYSsPCM5LvUml9P1ag3BMjiLgI8VhnUDphfF34Vg3Kv/1r59eba
Xqhhgs1NnVkio8BleJvqwLbUCnehIPKCOSN4IHiC8Y6ciEvG9Kspv4Sd9bDsCY4w
aHe7C7Aro2FNfsQwv7W6zgxeb6V7pLI6m42p41lLcKtBT3v7AK6JBKezqLVnvL0M
BUF5bN4Oi8T6VKFuOyknHKds/BrGusbCDwOjEMliNjJqJiOmEhkLccnZX5GthUT+
D7BSnnbs22324SFCZFpuV/O5DXkTbHQjVHZLNbTpa5xV2/leAR6vEFFR7mAXJkG9
GWzQgxVshsWiDjrcw7Z21uIzq1eS5MlB+Wpp7yYNGz8PnqYLGViJWd16X02lZfSF
4iO7eKtp4Kfui2MS+HWce/uC1XXrWNGtMlmpG2ZFWCO7fFP0Ip79fIvElmXn4zCW
sli9UGvU6cBMDaaYFkGIy53M5x5viKQ8sIxSBJCkRc2Ep+OD0Z/ncszqnxNgmJ6N
gH5ZFLZQcSAxMdJZYK+0C+B0j06LpCtDzqs79/JB0OO7Xq/mpEiPJh9Bzvsh+sbt
DnsoS81YrNszxoknJzsiT8P1Z+ZHBfR55OCaUHGqUzcJB72NRYExohpxVTrwcwTz
0cXI/crCwUyLTjA+bQke80iUhmtCqMRuZbE6UONsq245fUpauKA6tLOLBkxY/cEj
tSYh9Po6WeXpeHIAK644+bF9/X3sTgHJsCAXU+yUldms1nWuLyfLpOoGsL9lWxNV
8gDaJvYbtAm2oYCE9rj50LpKLi2berwjgS+n/xwT1y2YfhF53vS2ROPTjPSG+cjo
6MzYx3lx9C2Fbwq7dgvNatTeV+GmvDRTMvD3s1ez8XrrWFEZkFGDqTM2a/q3M0x5
mtmR0TpwfW7ot/ajKeIycBPUHfCEAj65qJ7CYILepLBcQoU19LHs9++G9F5KRLzY
XF6JMOCTazUG7tSc3kI3wRY4xwvHtaWYqzUpHQO6qzWFsGu0Aew4xz5uYAm9bKyG
fQczgPhwosFnkdN3u66Wzm+BwzBe2zuhVTlLUwPkWCvchXFyUFictQRc1IaC7CdG
sLWGQJHbjNkd4qpXxPuIMIM95KtkzbGehUbiLOIJsUDi7dbMM8zER1HsfmnUPQ51
jBTrRdKEcOR2ccvsvCQfUda9TrAnusRwx+XD0Ik8/syg+x3yhxJvOjV6pAg4Fzhh
Daiou+rYIURRP3042GHz7OLuxJt3ME7tJ2bpfYWx7MTeNOeoup8qvwK7k7pd7xGg
BECX4oN9SyLCOe7zSNROoumRuO/VJ8vl5IW0NBgGeW6JS9VPUdcfXQrFOWV43YX/
geQBewvAFo27xP8KXCHl/ToETEy+Ba/tasCPUFhK/iN2X8B3UByQIpBXL9BwQxHo
ND+RWB9CX1Rc7oi4Qx9BOVYyUyWOtx2I19b7NE/m8Yh/Zei51qzI5/pmJKmV8rGn
igWb2dcaMvWCabJRWcPXrrJhI2pgszq5wka248bykCJl/S7NLNHt6+T+y4Qfub2O
vcOv06nMtfnt47i86Z9HTa8qDFpns9/sIq7DxVKgB1bxB55yydXbe0pjucWyC+Ax
uM33tJVPuEso9qjDRrK8M9WKBmpN930i50nSy4aiTSBKNnLLcRoc0ZYNmbZKOW61
rNWQJJLy44k7zty9C+jysi1OOJ0UeZzi5xbmFm4vRDLMMznKn+/O1cpmd09VKXhc
Py5F5XhrDp7zpQwh0sWjuPj9Cpsuo12zeGZatv3fqosJy44mN/ik6pHrDZMwZChJ
ZIns/C0ihB2sB1un51ntw11VTO4AfK2bV0Ht89ctUbqb09eNDe9ctfoGrOm46m32
UB/9GpjIRLFVRBy8qXim/JUXGoNJEZ9SkNdrDrr3pkOUdo8cnheBvfCW6J/gzNqi
fVOeCUz4qVgswF7gC/aIrBrjTC1ZQS2miDMiUTN0XI5cTEe8tXNmkDQY3bNUeRoo
qgwgQKGek6QWpMAsZyhMBedKI1phT5ANfVUXBS4Xv4/UCzvtKSN0+UGI3kPeORve
HlchoS9VFaefXGOWNGPynQxhP+W50c0kzk7uiqA5P3e+tXN2DFbEoB3fivi89Ddm
a9GO5z2IV3E0P2j79JJEqMGiM9V9hO+jWO2duz3QLfNYD7ypmLilrDx/r8arf6+K
u8vwBHqiwJDmWvJu+vKoWPyUUkOCiCUjxiRqFAiaSFK6lZKy1o/lli/x9i0xhjeM
lbpIhsPnei1AA+J8qSODzwSvzqXmgkSx9EkdhqE2vYy+Ta3XO6F551n1aTgE5IIZ
0O5X6Ahv0oVPCCwO0ED8821KndAxCO7BzHNWJBPPOPKX0XAq60bPKJzj6r5MJ/6b
Gwk2ztAgI8ArdeohmvbIRKOfcARcgYc3bCBuJ+8PZFkDCc537jNo3biA3iVP46b8
sPnXiPma1NyHJod4Http562lejCAOKvqc69U5DK4xGTxOLanx3W2OFp2unZ+q8Xo
d6Z4FaM/1nhm+JjZGczCvcL9vO39ff09RCcEH4D8nH55umbZBj2BvXCuCz2DzzX7
iC2LtcaM5SwBH3JtGM5dG6p0RCaiqxAx2Uaza34JTDIVskAu5yPK6LVbpwBjAfS0
1kzfEhptk81I/hk2k+NHrmhkFH1ypqWxfcXuf9uq7qvALXanrHrrUnql3qmr1rX1
Vkm1kgyX9vGegKftN7mBplrpuR2UoRZlbXiplKZ7fT2nU3Y7rUx593wfopsXU4L7
+o7MjXTTldGcPPnCIL2lMZYVdjaVH2/qokwTq1Yvc2YQ8FonHSVcQj9cKg9VcJkq
fCrTLhco6kCn/fatHNC7gKMvMLgvcKUv0DCRhS+n6oID4Qaphjx9XrfIOUaYLkh0
e9wgfLM9ZmFqVQJMJYW0u7ROlz1SevyoClNRazQMglk4Q1yJkO5g6vjW5/mbXW39
ecBmzuOW2f7oPhZ4ZfirYx+XksempT7JyXQzvQ9VhJRoiOXd/t7RSSXO8ew5bAhA
52xkOST5meJPbJGOdkH2sepgIVZtCGCBOLeat/SgtHbd75lc6BGi2BMn13CwV6/w
FHzDWFqjN2z6raD1xt165g6cae55pg1cACYbTtpMXE7qPkv9o4/1q7/MZSlNmSrA
f1WSil51dUTNfvHD88twT1twy2WUb9bjKF2t9hv95Srul1Y0zTjd1M046xpwE5zJ
lQmemQPOC5cNqQ6brjdsIEAduF9uoPJA1bJxy+8LHC06popvrQjDuc6V95UKGRJd
EDCMUQifWKPXEtzLdBEdvJ8xzY7tEhCh16BkzNDyqjNm+qBF9qGeJbad8rxaA7vN
aptQa0yVKe3cCFQderWBKeCsxP8sDPOOGY1fh6WRrC1d1n6BfGmPU2sy8Jz0DibT
XndZBvBNAslGc2FJ/Wgi4qE38uF8tQSydHKZtASqGSr1a853vsUYD6gc370XG7hN
91EjZ7uJmC6/j7Giya77ucRf9+cBVqbOG68Dh/Voaw9LwZm9eH71Hdv9wJPfcxaw
Uhkp3oLOAIuJzY1cd8Z8cwZql9AIEwssf35D0kRk0jhH9VoypnQIEXJsIS5MVDdS
jZiEq0UDPTW4U/DJnCSsxqU7hD6X5/hANHOxqfRU5IGw5ngqfi6u1/QhUuhBihWh
Uv2Oa5XlUqlS5aR9rI6QOOCFWn6jw8SzqFntVtloa7+O4L1gqZiPqKfDlEGjmvG9
xJ1O/YOpjdlZny8TjaRP8qVBi9p2uTmGR+jVuko1UJXSvHh+mZGllX0knzd6eFrV
R0r7VzE7iQPLxNTObPUvqqtxHm+cBr+MD5/WmPsQoTYlJr0tVROc240zbFLZcI09
7lNnwVCQMaJihCylfm/TYqRCSFQwyyIpLIJ79klEpJJLN9yzbCHeME84R8TRGDnL
mLUu/bvoEtvy9rV95mbn71l8dgUVPJcZelXeZj1nac3Wsj5309Wzt6qbvafxzd89
Z+5AtDxmI7Vs22haXyo5bJhKeBeYXk/Ws8r8fAFRsQDg5JN8tuxUMRefObGonWhi
1HVr2m0UaFNom98FkzO7HQynJTz7jZNv+4AM/cTideKJpVR/UqsOfbx9waXnZ1kt
TwulLoD0GCR2q1muJg+XGI1STmvlIACgTVXn+XoZGMjoMuWbrlK9P1h+W+nhc5tx
HlmQsHxSTihtokC6/drSAt4dxuONumSrBb5OLvq8KpwvQf9zNrNjrlSv9BtceYnV
xBx7+RO+mlr1aVqsAKNrG04vzYLs9+OuBo6Knl3eqbGkeUXfGEuJifHK7RjzPuPc
6IM68wNLqdMlywjU6qa9EPszhfH/j7F7ihIFStYEnbZt27Zt86Rt2+ZJ27Zt27Zt
2zlVXdO3q2eq1+0Ve639vGO/RLx8PzUJVr7tS35yjJTbFCEnhVfeJdvLm49dz3rO
hXApH/U1J/vD+lIiwcVnJxrAfdvVrHIOcGx2Uj5OVXuBnxofBIsxc8j2TVyik1yj
TsogYWU0Ujf8g5A5CBCCysgxXykS3a+/iI6dPxOHQRIH6G3zX2+VvY8t2Hb4I57c
x45j4klywSDGUTNqWIkRXSn6R747Rsil/JO0rZmsLDdr11TaUZNGLUGiP3B24aab
UKCLpqtbLJtl6ldMPrmJ8G0ZaMfTTjKq6JWVy7IVVYES3v84SW8q+MJGzCIHmzgu
eHk+CHrO/HEVfpk2r37EaDSfejI06GPFkIFRjzzz82TiLh7IawMRLqE5kKCNEiCH
h0q9/DobwettadYC1JweNzyQPLFtOp7mQPcf6tvw9F3FPp8j1Oxovfbsn22XyYyt
24uSsJO3XN+bdBsVtm2P0aV4FtjKlwa/j46Ww0lL6bu9LvKbDjXN0SNT7f2PjpKU
uInHnojc0X289PP6DhqNSpWoRIxlR2E6asppCUKownHze0t16sdAu9TuOeiLwByV
/bgfe3EfmTfp1lzlPfNDZg2jQPy4Jatbg1+DBYnZyIXQRekf6aHvM+nzx6FWwq3Y
K6F8TN57DmeFWUCRTCz5lbGQoaN/H4ZAeXsVUKJFH99Awe2ONaiFuYOevsu9ifqf
orZtQr/n9ZwStkNoK9Ik1sioqhCeDpaotaVV2FPTOTKhFy2nlS+zL3SudK6TuxWk
XJ514f3KW4NQr6SMk1gUDiTp2kFmJ80tMeXUd4ZU2fiMsrw5Wq2K5s5DLMFI8ROP
j4CoUuRxLPmzPMougciXJM3c3ifotBgs7L+d2d76sl5qLmO2XlaXIkZv3yw/S3W+
R7Z8hhvMcjruQ9GPIVveu8VesZ62c81YSn+ew2DJ7UYSBqg+Bmpbu11vFkvQsblz
3M1H4WD6WO644dXIqo0jTL0GpUy+0gTZAlMdqK6Gy6ybNLRIIu4JMYlFmoaAXIX/
3t8aw5z4UiVaOmjIqAt7PAUhQtKEWiw2NZk+nSeql5m1sZUYArQ91bhC4AX/0KOi
hcRIcPlU1S6u22U0eRldHJX1vHQv0P62Cf9YfI58Ks8srcfItyzanWnFOny6AjHM
wcM8DTDdDkuAgW/SkmDcjHuQPDGo7TaWMtNXKUcOylmtme8DoU38WtRJAkByt1Jz
YgGNUcjhIKBf841NRM1TAuhCC6D5FAO1hlxq2t6LtArouaH5MKuNiZZAvCkeGLMu
xVeJPkSahzPwuQsD3IVmIaRAgotovnxrfw9bzVq8dxH50YrT/QjlPObonumxj+/p
qNwNykgHyw5Rlunhw9Pea5+00/yEHF/qRtajo/nYFlQeHYcWn5ikWFWzu9+SYJ+J
eVQbRL+zTf651Nl5xbE74XgUpLTJN/fHL5h39D1DDBnirwmRLkBDekGEzqhvJu+e
S7CfFCRmda3jzMgwr7dSNP+6o1tT5W50m/N6UXn7k4CUbN9dnTe8XT0mvp2R2c7+
yme3kAV2DWyVR2iMCmLmosx5i4P+RzMS0bvGYl2poak+fuTQp4LDR7sIEiHpqI1n
2zNIriPN+eyLFLqXY+19OlD08kYq+/3tcCndq6RWh+H1hdt0VpN/r2EaecV603fy
4rRYf1z4sRWPt8XlJYjUxK6KP44sydX2gzWb47VFq3RGw22z/els2ijHqvt42Ga7
hWZ0nKHtgJ5ZbZD6BEJEIB8YaC8qzZgOMtge3F6K+oT5wimc0gXicnHfKYl0atjg
Zh7DKNGaDR1TulyBuJqqCmqCFDatgsj0K1pEGVSh6tw4BANjikdcJNlpXt5vMF4O
Ywmd9SDwakkq5M4Zgubn1/1ydvcZv3Ygk65LohILoW2rcLjmQRszk5b2iQZqKmIb
oY2yi9He7A1xFjoAOMCOR09kVsSJ7p5nf/0mHixpaqmeiM7NSIBMT1cFnRYutl72
WIhtqFN8Fz/TYPy6CxHCv5LM1N54dHb44oRppnSTM9M1a5Q07EQ/ZlpzZjNpno2T
yqHHS9fVtVFnAcQPLMo4Xx/O0KcikqN1OB4gvU5uRPaEAxUsSGtvIeE6R3WRbIul
hf66028+x0nl96QkkX3njl++2zup+/PqIdmGvqrjXJJLsHs/Y1L91yJimN0CkPXr
HEMVX/Iblq+YXrnT10OhwtN5FjvWBmRSFD41bvYoQGNS9CnUdJ2kecBYzTkhgPJz
3RhFytoRe9H580yjLM6Ild0jogclWbOPYBWC+ePPd3JiCHpeqJP6AT18FF9ELH3f
NOieyIrVUlgHpQt9/A5vagKGVmM0XwM0InDvznC9K1NbDyhfDUNXVqvFcVo9gRaq
BqrxInBjoHWASUa0bKjg2MdG6LrGnN3cpAitI0d485DoIAIMd5OGrq+u7BBK+fhs
7MrRccj48r6VjLrXKXqZurjBy3SsyeYYbticieVSIqslOlmhGC8wMtyb10D/pmTm
HaGsPeXLPp4oH2ZckCau3kmwjZEnZA/xBznWyxPd2u5v+uUfvPvr59/LbX4lpveV
0B7AFYfwGWr7GXxeff2D9XPgE5v1r7rTuXm7HCtfy3dU4kz0ErzgxQjC0BCK6LnL
5yGx06v8u+N6T4o5/iazAHzQgIKjppUxyKRJOJ1uogfH5lSuUYbVtaqaVLZKO2q7
C65l5Yr1PBYiAeMqrtUslV+D97BnfLZC6/jqBtkBokqiyboOGK7uHaA1fwkIDsv9
6aWrgUPEZS3ttiEShk98VnsPicwya4d9OiMNRRiD7KJLfWkW4hdo72qDEP/rQlMG
osaTJpFxmm4WXxogupjxBdP0ifC+pSkj2uwPIzSLxpA/b+2Wq/grjcsfaryLu2a/
Z7ECGHdq/Ei+fARSfbWBXN7NrAGJzeRDT1napU8yJHnKNZcR+iNVirABOt1yPoew
m9h2VcpM4lMbZUWY95oGNELNk67jebvgYQCSv2PtTsQ6I88KPxHzUliJD0VZPBGd
NKRq714rd+fSOrF874zfuWFhp2FUyT78sKXgSoNrxh99O5c3HYnS7+D+mXpGJThC
i1Pr0sZT4xA3uYnH+/WS9ev1aIc2Yttdfc0TSEZ/39WO1RprxoySvEWLDeRr5tMO
YVJTUpLiFGwxDtECjEIxvB2yQz4TXepam6ToNl3kZqBcuPgeuID9uASm2maGRatt
DQ22kA7cNGS6ckIOQzJXG0AmHAcVBcMUfXGdJtK90fZcFB+Qqy4eAb40s64POf0z
kIBL7TemYRSQWYjiGOTEBmlmvBt04bQB4/1N99BdVYSBlARXBxJVz8eC7Gq1LtY1
ok5UjbVx7jGi6iNhMAF9/YdbuzeZvGauM2usv59HlnyeEli/xWOwfCeRy+XPCioP
hcnh09x/R5ZcTfQOdzTV+dU1nfNcZmZOdhbcw8xezibRUrO2K1qf9Bi8v54hhPON
XT+kTUDdxeg8/F5h2PhTBQUcSKWebqltqMIKiga4gL9sPGyp22ndmD1EPCQ9VzrU
LVt7THiF5I5+iFcNnE64HJ2KlXTqC1lQoqPq5Bx1znOOcitpxrrnPUofEc8NNonz
bZ4wW6bv86NrD0BUUrHiBNP9LKhr0ITqxR2aLclV4E6CaZUYaLCX23xIIsQJmYER
7Xgs88DMrTo8g/h5gAunt69kCzlrRWa6JeowmafAqbhes4Qg9cS6uThT9AB+DmnK
quL2jU+9w9t15Gpkxq5rdRI8vx8Ty/n5OoLgfK5nm6z3+idWb7z27ZTRfOpfzmcx
Lr+/1/UWrX7uOL/WR3ev6593SpV2dxv5n59Dgb2PcoDEHin4mdv1nC6T6vrzVpEl
T84smEKnhwCoi5H3T2aovkUsjJdQmpmU+6iwf/3y0k32VNNjoIssD24U5n8XyZEw
6TdAvwLtdgCJGTNzEqBneAlJZ3wotkuuNnMqfDhNtmc+AUzEe3B9GBI6m4LPBsl4
eXdhnfcZ3f9ORYFO/cJfr0wF8g2RBHAoEaTmKkdEKEPmtk6dCn3Wqw1MQ9T82m+0
tV1vFsnP+swk6Bh5dIJb32ZEq+GLLK7mLSN52LGLAkAc2h7pfNMj3hzpJKumG8Xq
phs5SJ5gUE/hOA2mF9ITxMzlLFWUNWiu50sooVx5I69LJYjQhdn50uAcloYfRBXY
M8cHt27QtAXQT5L2XJ8gbc0mGqBnMIRKqszNKT+IR6M7gL1pb/zpv8vESqUbvFBw
JUDaKp/m1jnneMMyyzk7FNbAbSmMpeKev1ZkLJo1Dl3TbxzQgtnolwbM09y1GMZp
4HiHoXD9G1xtPqXPshnePyZjimtXjUlNPNY/+nL3xxTV6Um09ZSvES8swSnd1/44
MRPHe7qopVGZ17EosZIAss2obi2FYHuSCbH7rFTuKGHMJJ6aiF0AzYqRD0kmLwTE
FWZt5DGKhg3yB0ZpPNxy664QbV+GNeY4tGxc0wQ93TAeojmgDCaPbsfhRwbwTjz9
pVFyKKI+o0hTEux36O9c7pQRJHsxUulkgKdhdyPZImYbibvdEDkyJc6SGrIpe5vG
HEFtXVXzF5qwRfuUY7oOVTx0tUkL2DmVR4hLsU32sr5pZP7GxipbaHTC3gJDVAtc
fTqeIbw0/Bk+g3Vizupl1pRt47NSmrRiGmCKIP0wwJw+ph2+PCuEX1C/ORNwrjWb
NQFLg6lZZSLna73NHfmzrXKBRsd1dTqNmLJKY9VIwjGf84LYdNsAVx4ThkGU6LW0
ClTtV5F6gVTjQgWA6HqLTkxAHyc/S9CiLGsPnTmgNjUADoefYwEkl5CNLCxL26Me
RYaQuoZbogKqvf/ld6DUHVV90axh9B5xmQ4+ZLS+ygKQSz7GxYCuoexv26LpgafQ
yvNbf06XpZZmjj3/zbm6TeUZed82r0KGCyMZVr5yXPHdOTtboKZibKsdf8ZpOCfC
3qU7xHyo+vPD275N0cTPUhFuOZjJ7jr+TbvzVeFCe27o5G3ONTE+P3bICjcw0pXy
MfAQNMg498aaf3aHSir1GSyYiWayjmktJ0Xv3raR1yKZR3cPwd8TyxhGTqOuP3mC
Fgy65SvcJScyL3LPslDamF2LnwzK3waSjqHTYm48UKZjw4Tk+ACYWP+Y5cyBAHoQ
3SEIjCCB3iQnDzHK4ZtOFrS9eKCUViDl4gQl/Mq0XE2C1ZVbZxi4iPv947RdBf2P
y0hqhUJnwyEhV+RDMINC7MAAxUznnptuO53fpK/LecHhS19sPmmnvw/JWdy/V1+/
6J7FX+B0RPD9aJ+vcmOLW25+aLO/Kpd6lcIsUGFvCk4+lXKNpnIAdm+B3OoNebtk
qTOPNfYMC5cUayqXKrUb1oEyl8W6+Ogmwvsx2QUmDZ7B6jOggHirQT3QYQPM/Q/Q
7zR/a4mu+UWAV4t86bC+0KkVIqLAmlVg4PDTquz9w/cOhTPaKo5ghaMau3jA9Xuy
FECmzyDVHG/PQl7ZfFM9uZtzdtz3IkomvXZTOoTXzZxmNhrN/SoqL00ibLV5j9Va
k6V7Ke94vnE75OlPViJNJZiP0CzaadDRnuMrhIWLJ59ST1dEQ1Fh6DMIWC9Kj3Q1
vcVjaEeioWPgQLcFDNgBzKROlBTZ/SfMNqrTJzABkpkBqMwAVPgKYU+TI6vvgdQI
UFFfmo3sJA103o/OijR89oUevS+BNq1XaXafT7Cr2NfslGppzSm1qW0Ydg229Xul
u7v3Vga8quHX8O3DGiczeR8OZvR59KNS5zgCtYDk2gvccAQ/ojS8tPG7iMcCQ/Cs
Yu0VCWlVeBDwSpujVFFuDGDCeBPmipDmZDPjGsLIDPxTcqe890doaeo0p6Xwmu4J
gOQR3SoKQ0DfKYKQEK8Q+5A1v8n2RiRFvqCv5STIksXONUDuaPMzy+FefJUmz/v1
yveWze8ljLKS5pDk1NiwK8Ht/zQ+kCeDUM2RY7kZCqpoA/nvAysBjWHp2ZMZSX13
mxmrFJXMk/etGCBCyn4FRoa7lA9B5mSfEAFAEXtSNN2J4SUFPJ/cwJ8xlOqlCcpO
6asLxtvLOMyiwK/seRZtHj/3KU65uOI2Tb0lqVcp+3ktHqCTR2UzMTTbb3Vxsv/e
/S397VZbN9v9EXoYv/h5OgxdwV7J8fmqXuLHK/FTqW2/nCCkHbw4GepaRPrOyWl+
W2U+7W4dcT3dtqrBUtZsz3Pfu0FdxbPV/GEdXdLNW/XJU+c1DK6Ggjbqy88i3EO/
aU/RmY9qfoukk9LkdBtX7MiEMgKbkmaGVh2Oazb1PWMz5LtU05hxQTaCIs2iuhcZ
zAmjX/hTJzX53IAsq2dvEU84utP9BoS4yqApR6W+EwdFtXK96fcBbneduDf2bl79
17sq/eAFrL3/rkXwxd5lLfGwpiIBHCt0khiW+mqWUm/9GW0Ax16q9TKqhsM5I0oM
dA+cJtYgNF2h1N5XGxpStIDyIl9xVgPe6oXmvskQuo0Vj1XxDCg7A1KeHRIYrhQT
WA7gixPAd6KOMDFLFe+H1DMGmt/0ikM5MVN6BhqLyvu7UPXOsL+IGeePfR5IChM1
rubMFril1gj+eVymXmY612f/rRI/rYfN0Esm30bhFXfr4+JSe+ltyUptMePpBtxN
zg+Wyz2j0FyML+jImDj//AEpyQ2Fw4jPclFt4cb6qhsm5n7bFOfAqkCNMwtH7VM5
PCZeQyONh3oFy558W2US1SSDSZpJklcB07xjslcJ02JDX7e2pm37vI36lraeo2Fq
aDYmB3rtMX7MfVZCZWXQH42E/OSzJzBgNB5atMJl01YtBPkbZ68uPvytdtbOunuy
iVi00iD85nHbIMZI3lWaSJtslEmDyH4E109t29ZZC0asQVtygVJgRl7F5X0l1bBF
c8a3rUjcH4WBORLRB4P2MXMWDIS0IW85cm/5UP9VbAVw7HMOJFK0I1uSaArnrRwK
9u+vHzjP0xkbQ7UMoJ95HQXDDqAful1Ul8ZQH0CTmEJjslMET4l5/h3x+L0TjG1m
B8Hifbk4aLO8Zxe2Nv645TsZAXQz+4i1/EOOvMMmTtmt50nVLMVxIZQUqGHwv4ff
72gcN5z1+capososeFXAks1VlLFqJxDNJUyjkNdk4DnIE9lkSXzxHffVRqABP2uT
99P4I0NCvD3uvC7TP0udop611M9sdyUv/Z+/ugTfxdRxHy/4bi3SvcEzi02MXFZD
66UBvOEpKqHAXjTOP3hBDv4k8EOeY6mdWTtUY6f0rNgA67EyB5h03xap9LF6H4ls
CP7aUVOYqdIwxSWOmTypM8vTrL+i5Ea//kXMZ9Fc2YrkmLJoEKRGS8au6fqCElzE
WX/MWODpkwuiOhjCuP5qhvkpEyxt9X9lzBszDZBLwrTAnSxGoR26Ty9ZBnbIuVmp
BVOLRLD4wgRGYiytbmcgYoCQjG/ImPbnDEHBJL3MNshEvr9o2NQesxp9IAeCcZIL
mQue+K+HQUFrmD+mudIEkMPc2VMOLA/nu2z1FxNhJz8ZBgql5bkGDZvHvxbLG2W/
NWnUImflRj7bFzLu6tkIJOynrZ2fSu+js9WccO69T0yRudQF6Nz6Sj+OrMC2Z4Ty
XXqG0CaIlYbW/lluSL/haK285LuJxU3/kYIbD0Iw2Yh9npuIUjMq38WioK1PSRmw
t3+FhqPormoa31Dh2uWqbWpfBbvcSBDniQXTrev425nNoACPQDv6vuz0g/739e0V
vXefX/sL/LV0ONQAL1KgeBHr66fDk/zIqtWoEf40+fmL5yD6DcmkWHXZ0WXd5KHY
JBEmOmI91CMCNcUFwuet9XkXUryXCjt5+SGQyk40Z5K92dgBkhoyedPSJtNay9oi
s2G4ZfCFV41epAgPiL0XcQMewH3GvStJtsp9zdk7AhrOD9KqmP7mfjt2jJCX7KEJ
DSFDVye+nIgkXbqkfDE8xslIKQ0c9mLTVvViE6aWPq69aTQEmegHss8iXx/4jTnV
qOMD6J4oy6xITRC8U6oR1YLHlxTrFnUXUb2CECI4BgD1spBXOzb89cQkgzUKtOpi
xrKlOUONuOmiiS2Nf17rbJKenqOMu8oIUac65rwPYp8Hpazs8f4FYLJeYsypDQEx
JkSb5u7M8/XW9d2AE4OvLBgKFMh9w3nnOrXsXMr7h3O1TI5AjhoZixgFZkkPCmzY
Y8ljl6+XQO1zfEGoRuHOhQGE854ejbltIJ8eCyQE5CNsNJoUxo4mxkQNe0n/ZkqI
tNz0ZOedGy7KvL1pNrDQydxk+2N59ZTMZxWn3ej7r5FqIfuvwBj3d/SwMhXadOan
Cs/rysc+/bbvcAa1NptVXt6cs2ysNFbqR8oOp1QmW8PphLKZXW8R/3cTRxFaLF1v
03sFY6o2eJQudFSM/+0dxqzatWKFxhWoFH6xnKIl8TjEX5G9b1hYSNoI65gzsKMl
d8u6JGePvPE5Y5s6do8auCl2mqaZZr3DdrI5zPc1xyWvpV/NmdYdu2+/SV48SfEv
xeIt3ZuL4qUN1mPHTw2TFkeW19wH+QpRl01jXOJ+BI3ScdyGdB9Q8SkVVqsTU6dK
zZhwAtrGPkXmwMzgzMMofaI7tywkDhACZDaovTaEry4R6tNHC1053GQN7n5jZE0K
wWQlQqNsFM8LtYyi0jKc/OY1zkh907dmjlUge7nJ4zNR0AqF/BIFcnFUKgVQVl8R
VZqn+wo8OQKUt+CtYT3B733Eb98SawCHPVSsatd/7DioqnuQTHlQ4gRfwaNpleVz
sqnxxRA+Vc4C+CGERUTaFRKBXJ6+EUkv7j0+6zPn3CmW5fi6vHX+qsu7jQfHZrU6
9w0NtZe5mSPWnqWkzz4XhaPnwOCXtzxPN/Hs8IIVUbJ+pNkgvVBz4+sScVSbltzN
mZRuIbQBvbKuoVOeehIjN8qtO31etejdq4OBADDQiJxuzSRwPnclDCQIrwFvLWSI
u2wD5vnxc3NZ+TuQnMhd05zTO+LrhQvEK2ZLZkBoQct2GbMnko/JVrTSVdUrpzSd
0V4ynbRo8FsMfkYJtH4VPvU+zToNxFvXotcfugP8q1GmNqGDNxxfzmKGrcQ8n97Y
wuaeAdN94Jsp+CK/UFMREEVwTVDRi0wpym9X2lQnJAQnRw1xnXt1OWJPzRr69fdS
nsi1RehXqrvcGs9iavQjVcbhvRaarlZhEB4Xu+6O6+dD4yYFt3dmRHXiNlwBuXV0
DHbR9pJBLQbjfzV2HlNAcjnLTc1uXnt5Mj5WG2pv135Ox+B+L8Yv9bxPWt7dFje7
a3FK2peemEysXHkwtevunl/5Pa/R6IxCjWZiAojqa4Qum81kZFrQ/lRWDVZJ4avn
ziVbF1h0WQmZw2WWTzHN2LOGcRHjU+CfeF/88pw6rb7u9H7yoyedRoggAcrVFAJl
uT7zagY0l5oBXBrhDl9UDeqkhtSwyDbM1PvWfC48IvPaKJdrNaTv18AD4eOAkFCm
+yR7e2zpllWI46gML9g0Fi4DLhxxxBMqhCUqw6W4ETZxJLqccYBxgvQXoEDx4zuE
RcdyzPQiq0DtidtA5OKOOpr1C1b54S6WPjPlFjB6SuKjUZC/NeE5nOAQDjdB1heh
L4jfwqtHd4cvZKTE8HnkdHD49AuDZQPJnSWuQQc4B8y0+VHVwp8O64+kQwJPEzqe
8mRLfpt1138MWp362Vs9Ah93dhTQ63UerNuw13g7XiNjz/J1h0hhj8CatuSGMp96
3X59TBfedvefWqO0mWM4n4xkyc51ISI5CpdaKmVEPZ9oLgCZ1DukrAOgZt1GIxA7
CGHP5m8hzP7Nwqfmb58BOdqZAfzZye+fmQ/oz3eQEykJK+FEBy0JUbtQ65itY+ZD
9UPQb/XsNuLdUkrgIfw0daEGylXhxGA6H+e7OhCM02VnvwRh1d+qvw7ayQWGerUM
x/lqZEACNB7AAPQmJgMVKDWloaqWIuKhQehfrxlwR+W3DGpPi54LL1WinbMCLVbd
ZgYNYzAlZ1Y+g9iDCSDUwAE52dc5ZHZhlLeWirrhcgiBqsTZF3uDQI7qnG40cGLV
kbYK5h0cDB4mwkrN814Wj9MYMTlZOI0QoM4gL6h3Xlj+nOjZ/HS58Lr4eAxbE/a7
oVbevGZmc8U1OaT5Jt+uvwDlGv905ibaI7HWoJf7Jn22Y+0w2tX2/N3Id8oFRh/v
R2kZsDoqVqO9YlLq7N3anYyVRf8Rp43V1KvDAloxtFrYPU/99uaJBI6v0A5SbVgT
JrswhVSPifIjZbbpx0twjiHzgjYJBtuCbhkCr3f7pfJdQsqXWDYV+sYiR+41BU03
Tj42zKc4dRogNBFKRAomFkn9a8R3c8qVAdCDEEBF8S4p0hFf6vMD7Iw/TmxWx9+u
VXoC/BdeLLlywRLWm4w8k6mCNXZyRMnhVle4dlU7XJPxwgXMXKJiHpMELps3nPck
YoF1zReYS1PtPPy5/OjyG0FS32qL/+BkvtBGq+UIxFbH4T1J/zfyfhAOPwVvvc1Z
cPmOOjs2M5Rdftfdlo3CUMIy6wmWInB0k2YlY9p0WNWUzlnHtsbpPKr9Z4vJaUsV
rZLt1SWaBd5NdoE97TTDj+l70eYSk5oaCwVbxdlj/qSh2uSjx8NH2nIyNDPsdDlZ
ZipTg0men9hOTNJJ02p9vqD2oeevj97RnafzDVxLYzdHUiF6gkj0QPfAsQT1OYn4
nuG5PrsFqhSFMfvycRgNWWxnQ92Cytkj7r3ScqVHZne1bjtMDYiaHtkTXK2+lVAh
ivU09RoWPC4K4deu8RpW7bAwZKM1bB+nDYm4560jNy3Je3xg0Mvgi9FLk07MmtW1
EcEZyPBa/yDCRugY49EAcAJk0PFxh2cnv2ILT2xj6xDqugvrzA5C5j0+Ts3lECae
A9QAYgAzOZNXz56l7sWzUC4KlDFiWSh98gPkFXApWGnB27CDeqNbGnUoXa9F96yY
Ogk/p8v07S2X/aBTI9/6R6Udnu9Niepmy26do5awvrbB8NT4d4LbQoY8foHzoXD1
6cmvu/uxtNL5LTd8z+tHZq0TXBseXRyWBG1P53Wca3M9/SmsUVRmtFa0pFHpfdp9
kqJ8FOIhklGlg3TLWRujDYtoXSzYb6D/NgXXuelaf6Qc2/lTCFR865jWcdEWJX6q
S/YDZToiJxV+fzqN2RODGvwe+fQkJfg9BoYy5l/6MdDlvT+hlgDGX/oAMwbPoEY0
egYYAYB8tZfQrLIg+kE8IJ/7ljxmApMpZI4Iy0SCYlV2dnapv75vd5qtOPxeSV7e
tqIr8k/vdl4o8wZvutxuz5e5mjFVF4mcLxfZnCdmKdTNQq2tEzUid6/YoygeMA3K
kSiKKfr15NV7uyN1otJUUwzwPJIM8Oxl9tD52QoRGAHqxxBNxJjqbWxQNf3ighQ1
miHqUUDjd3BX2ChRhZuoaXLQrrFeDUaCNXF+fGjeDH2cQ/Z3hHtmX4PozHY26H/T
zz65qkxHBHcZP9D0qCeqUu6KQQj324KEsG1a1FAnyI+QR3o9+WOp8KnMCqaswkei
evSXKCTr7SVOT85qSzswVhplxKHOTwaqQ6oQfoi19k1FyMeFOu8gpwNvsxihrweG
S7GkQFyf7s5dGfKNCGxBElQxEttSNGP3MsTUDhbIpg+ot6J4Aw8c+h9joSNH97+4
p/vx0VF6hvIUkBQzDlyravggpEE4xWRh9OqAZwd7VdRGoM4Rhdp7JoiK0H7hCA2M
ldfXESYbvRNRTiQ0soYSj09PO97fLaaH8WVA/iAZRCL5CRqA67RTx8pPeuD5QyK0
iKxGPFZeU7TrpxwUSXPM6Yvb40PhUBZ6ZGF+7ePkt3OATrb2E2K4aeIIXjR1BKF8
GiJFsGoyTrqB2cvB+0EwsatdVzDxOQAGvF9uxbjIq/Gw+w0HxWfuehwM69RTBqV8
FXQbnBxbgY3df9amcXUb7Mbw6ohe3Ycog2/9yqwGVdkcT9THbi0+M5ai7v19Ar0b
FrZbcESRTB1sKce92C2id5KTNHN0zptW/gOLcOKZzFeEd4/7WuzjuLTX0M4zEwcE
c68hq5Y5rLYXpBS0zb3XxwD5l9Pa1aHK//y1+mSPZplGI4BTb2kvo3xOcJouBr/s
+XYqOEPWe8vBFyz+jz6kaXWDneqGzD2zHmCrfila2YVW8lP2Qz1pT3VPUe0i+ScC
5vELxAZPkKwp5kSnQGAg4ncUCCgV5EMwRj8N809JFe+E3v4Qt7yB/UziE6puvZ7C
HPasQAjC3ha4w70QGB0BH/wUfqM3UsDG+vjzGY5YYn8RuyQXK5wsj8Q1mZlrgjTj
pDSkgsSU48qh/TxKrdfFhnxmLk5lxoY0uvbGQxeOn734dsI8KrtLc13zKg2W962X
TnicgTHG0xbRVEHy23kgr239JUWYVwtHNIHYB3V1iLCvQ385+zstsXMqFtk5FqyT
8yNMKJWLv5N/aWytHO4xznH5o6xiCcZopewM2az7LpFJvENJx1j7GPOiG64Ltkvk
MxVkjP2iakrIAo1JikX+8BHsuCe4RmglAcWRs0JeAF4Wn5HvWch+POufzm2QNm+p
JnkAbzyQvlIggdIUZQWNZWhFP09V/JD3+U8MdxD63qjKbn8bUBCtSMZ1IiTYzGAO
zkLEsZCOzOI//X5vI+pTdaHijq59ErcA6n6M5aelTyRJuyXMsuhQdFdwxy2Qu4NG
WXkyDHLqJdgmNEV/KUJx6vsBvISDsbzrAfBfpnB734M9bb8+s0eVyF9bqrU2Wy5f
XGzeEnMLOtWLfjZczm5b5xiae15vvHp/pztv8wQvlR6PeKbykDuJS6zctJbwLkgv
KFRroskKaZBo64ccqbdQ24UdU0XYxWGBu4ADibuJg6JDK2mUu5QDH2GhaR6XRHdA
+2fOPmvkfXLBduBz7bMh8GNLCnPSshSQb/geAFCtBC+Mn50ed52UK9YNgvIHtnm4
4Ld4hk7oOQwLKiSZWQdTacSHUcSGnQ23T6CvyAc0ModEHkDx6javaqhnuBQTHN4B
3qT+3vez0ZZyJlctaEqM+b3eOHO7gLDPcLkEax12KZ9G7Y2gc7oMXVBqkCikfxDb
X8z9TY1jisKQy/51PofIhUvx6rPq5OXi3JZBlY4k0m4fC1B4fWw56TAD2+J2+45/
X8XrdHgoyYk5VavyPn8/puVWfkxSZ4/CbmX8nlssb3TT5cu7rHqaymff+b7bdvsZ
8zi/JhhmZwyDe2hhq+MJq2CKHld9UPi6XrP2aK9i5oIRC5rPOGT4A/nSljm8h5xY
785MdPNQyMkSdszNRBVa8kMO3SFR+aboBFFJcigmPBe0544+TrcPRJzOAbGfTKjO
Ie78qQwyEmSzLGDMmq07QjzA0XoQUCE0THSxeWlNRFJsgSkKICD2YXwF86UVcPhS
CjZd2X1xISgcCtO1gZpyKE/X7dz3KEpsmZnq4tMnno/mm5CNEaKboN6pOON2DM8Q
wwJHnZbET+2XfG97aAM6e9yl8pJhzOoJzGdXq2iC75FMgIaf/kdQtocylHKEsoTy
hDKFcuU99H3kveT95D3lfeXF3Su+m0JXQUVhoVW/oXyeh5mv0d3D2kPQqt+nZJTm
FY1fw9Wv1kyGXiOHzhPs9/k7sw085jtqJnEXlkCCQFlpDjacC0dTFBfuHxeCC0fc
32fIacyaHGsKqqa0IwGWm5RpXifgLdaUW/rDIPz71Y/Rt9IPtzf4TxdXv6HeNb8p
evGvzK+pX6qTEdguBDwA2A78oP3YOBLUX5ywY5zkB4a5GR06+X8MxRXTiqIWs5Tt
0E6atmPVYV/HMR4Us+kITGdjWRhOHJ1JwrzTiFVf6G/NOHqqoL3d2hr1QokHXXho
1Wv3t6NStG1+SbvH6HguvXdAb/tLdovoSQcr2/kXxMUoc+iBDYDGPyICAN44AN7E
rhtJYEOVD3uJ5jVnVfrNqNWoVYFezFDh7mYvsYAF6Yqmz0B7sHsCpmGeTX10Ett0
GWaxUIl/KyfNiX7NoH4Gqu6T/aIUavoYRXCMddDqOhvQMHZ/qoUu6DqJOgniJGi6
KdDS9AIoQ6WayVMHxCmcWRGTAI7Tb3OG4Tlmgc/zgy1EeQcY0wYdwi5UnFQkU+2i
wSLqNfCLpOCNDdDlHq3rCcZH1fSFIX/WCtrGzBdIjwgiytq1C8jfJszJkPdtiyNY
rVaMD7Y51u99kMOHuHqH6yh0g3+3KgcigdSv6eBc/YvHCm2DdTQ2TXsPR1SpP1F2
Xk8GjcBe6bvNBmRr5VxJaGkf1aZf3SeCWnG97Re62O24vhi7SZr016sMUoe8Q1BT
q9sNh56H44eK2Wfuo3OZevRokjKNqMpwuiwnjmjVe6bOmwi+galV8UZs6/ivScn2
9Glm0Bn21YHmImFX7Fszy0R4qF600glISBp1psnfly5omuaadhTMqqxW6AWDv0yt
7fyjdirkL7ifxe9yybaeTqgIAOjQQO6CNKiEIFe/RMdjgRYVHhL3HgHkHCiB7+k5
0GeYP/764mfGLn/2cJvpWWMZMvSfyQshK8tnnYCxw+scyOwoapb3TMMWiRTMTV5f
uOPf0Ds8IXNbi34BKAOnrsroabhu2nS63s5IooTlbhXAZTyjZNbHX6CX3Gysueye
NQDgF2r1T8Y8/uIUG70kAIyMQGDHizrxqCpUyFkky6mrEoWhYTjyoGUcMg5uHvUx
xEvJ589Ooq76z0V2C+G/cHEuhrITdYKcol5pcTAHk125OGD1v8diyq5Ry2Bn5e7n
c3Z8NKW6epa/QlnTXC5taUPCZUHVkQZUBxgT4MYBpwgxegnZ3/32hWPFYsRiI7Ym
sIpzxiHirJkC7k8TEw2XcNGwPiqyQ9GuhU9n+9fe/U69BbdxvPdWdsYReG9ZWTEl
CCMoCqjZqHUmj3KfwUQCUtVaQyJV9gf0whzwVS2wIvQThFTVtkIkAv+Gqb/Bfjpq
VOg87y/LxypOX5uOsh6ObPPWfde/SKNHny8O3FxvuKjfIh6SWf+ZrTA4Uw6kTOgZ
uEo7Y19XRak1JCALirmQEWHEQplIAorxlfI4UL664QJZ2luIoQbqV/+gSDrirpDN
6tXCXRbDYFEFyyEEOsnU4Qgk/Ets+SXJHPpYIcHIlOVTjLnPTIBnzMFdsa291Rgp
Er9OS1q0hsGumshXIj0OsUhyZWfBwoJhtrhunWOQ40DaHqM7WsNexaJr9kd8tb55
AffjORR2ZHRceMRLhj6xVKY2Qf2JW9YucTctJgFedjehN30mYbGEyXn0iBhPmTEi
8yN9BAEW25iltFQKsELFpFD1rpYw2C07T7aUlTtXDPm3Ev2sGwNalwyFnI+qIIky
chgGTOPHAsgoyJnCgUJwwuMOCh+/OheSkDpELHHSnKXfYSIv7U4DZdg4cIIISNrZ
M5gQoSLJaFamR3CR5S0O4yeKok0raBGk/oClDLNQpvD9xO6nzwJ9v15HVkcWcHcc
mecIduiPD1/NkOJ066x2OIZFcEOKTvFxFfNjv9rujQC8iPucXgnaz4UIodpO73Zm
h1iM2zab2f0QqrXPCPQQMbsuoCvH8dZNmy05mOBawcfUQtsYozZ+eG+sv7EoDPov
MaR40mmb/7NNHaO2v/lxnDDyKVmYyD06mGdUC26hQbO/ASEZTubrPX4Z3BtMMD7J
4BlOHFcYXDk+rhI/AuHO+hnBPPcOpRyMoELe35QJUjK2BYfkQ9sveACRAoXKdz1U
iPxcwD1OzmJMYg9VS4rW8MZL5Q3q+EAqTTPGk7NAsV7l/lzVy6lwcXYO1QTi9idC
4bksaK1yBT1LibU7dq0PwNCAFoMFiOwSfBsMEzxL/H2M864Jvp12gM/BU47a1e08
Pdu1yk2z3cOv0puq+rUrCrLhFSKt+u4xzZsL+Q/OWuYqVh4SXnOPHFujzSkNPhIv
50/r3mT+BR/rL6mfiZ/ix6YbcqOxqP3hUPz4SqLWiC06RzM0myCyTB1XpDBBO4ql
TWibLf26c1LqZhTD60PiavxTJTV9PUrwu9q+Gpzs8avwTKSYiAf3RZRRoVGqUbCw
cYOEgL/eXEzIg5DfBwJVjiDFZkKIy8hf0F+TX4EZ0kiAfzxBHVjBgs3TVcKAv3xQ
Dhqy5jTpFk0zr1rOLuG6CSvcOLIhRWP3HLthH7XNm9sRVG39sQkNmAi8R/sKWxqS
ArfDPEut67hp2CrNc5C9s2519u955Lhjv1jbZ8rUNqyPJ+sSmoP4atMLjGSc6y1Y
Y08MnjMQfwEb1+qxMpnf0zVVzRvvJIi+svh6M3PGOYHzwxm4fs8WZWV7akqK3xyI
rB6+X8OraZYFV8Gvv/lBrM8Ra4eR4dcPLFSYmPLzt7GaRdYBrUWKJVqe4l0XJvFE
/c8cEI+D4p5/3jo/KyDD1diLYq+WHqc/KMaEtRWKIY6ZimJvl8SZi+WSHqLtvd6D
XgRQhxr7q2Oazr3uyVvif6LsPIYzZ/i1eaJ3T1FfORdG3dILHJN+vaLDwZAD7lue
wL2ylotgIEF6mE+FghVHnCaamRARZzEjwzEm7yPrGMslCgqVPl+7FajVe+rcpHOl
X64kmm/98o9i9Rlic+y7BmvOPc+2ha1f1gutl2+cwgjDHupKHnA5ZP1/qKnDHGXp
uH+YOI9auV1MdWJeejc6MubIAim6mBnPb0x/G9aHWCKwjKzUiJrMYcUqbf9W2ygW
YAgVFqCBRqiJVEvZ3IM/7c2OJx4MBwXmQLU0D0NZynvOKfcn6qrQRO7l44kkvHXL
Ph31mZo1So71+HDfTk+9+hgZhvYrInVkphthUeP64Ed39e9RXW/BpWUGj4y4VCUL
Ap6781hpgfrIhIokAWO5D9jaMJ+BOkswV4lNJfEXFy1FJSiuWrgB+W42BfHuF2jC
oAmTNqLQhIT6mC3v93lcep9VePLaL3Zhdplup+B/5GIyB5SuqL//fVamxe6tsvQ+
3xVnxHkaNfr7VP2BKhPB8vP52QxHpDBh+4oQAPgmKgAnKxIiRo1hzWYCDR53Dkkx
7Yupg4O5Jwbqz9rhS2g75CH95ZFl1B1Nm8hlva+xyHP71poWMw6fNts/lGaaLe+c
gtJhaP/hPf1HTshC1THSrFRJlYMiPfuQVgBzj53MMEKRgzdKnYyOLBAyno5oZKBU
TKIm+wsvGmN3GyscXQKKkrh07CBwqQuANGELsdy3L3tzU9S9CUw+si/RtK8zDf1r
2cNRJjgXq3+gwhegUkguUDPgjQFzAiyB8IGUolO/BKUIikIBJYgSi9seUcQFh2gA
+QB4YfbvysjyNe9fYOrun4n79dfzo4an0YgJfXHlS/P8asejeAP24ZhzabT1Y24z
utic41HfXqxLmpuSq0UxX2bw3oW1tEKhpePmMdmWEjBe70uJsrrpMYm7pikun7Kq
g5YlQwAn0tcG2x3aFylOI/zJx6428Q0LmAbhL4SOJWJrCZx427rKA9ZzdC0Czwep
FikZac37gLcYVoGaw+EkRMtDd2cE/ZMs1DOSe9iEKVFNW1McSQAzkelj4B0WOkU8
BdCmJeiYo5YlC1mwC4VcAeHT5+m7bqC9Vo7zmDp2kmUvhKJ5nOs8V8nPfA8dZy1k
H3lspCPoKEElYnBMHnNzaERPLfOl6PzjQozOPES3hCECEEBVvoA4afZUifk0+e+o
p99GaPKyUsQ+ohVKFYyews8QNQMkDh9/59JK1ssIY2mcabl41PGkG/D87CNDlPLn
jzsNcuIlt0fl+iqSUKNMijs+XRkzAHM4s/YQWizX7QGX6OZLBjehPJuVOM1OHuPH
z9JPas7Z/YdJ5EHx9VYtvHm3S22P33Bn9BPB1RXaZRQHt19lJvdZ4BdiCxcsDJ0K
C6cEJjOQM1OlQxLcN2Mdm8VQhmVLmaaEGlMwK6QqdDaBdJvKOVJn6M1gvLLPVwPS
ABx7sc66i35bcxu0vLdtepR+y91/vJxKYXVAbBi8JXZuWe9srZF326GChaGN+Bdc
D2mn9j9gmv8zuJCJgfl/aZr/I4Tx/48Z/jcspaS0uIaC7L9UQ9p/QYX/Saf8f/Mk
/+90SpZ/ioX/pVP+UzL8L52SmZkZ6t+NyP++/qU3/sf6/ziX/7n+aT7+d/VPM/N/
cyH/Pefxv3Mh/08d/B88JCfb/+IhobRoWRnZ/8VDMjKzcxJwcrLrEPxvOiQt2/8V
Dwn17zwk23/xkAT/Jx7yn8mU/5mHZPznh/w7D/mvNMt/a8X/DB74dx7yX7kD/8VD
sjGw/dOY/G90yGgOWHeU5ebTrfTt9Wmy9XG/ASDmyTiERk0kJAmJcOPHRsI6ECQI
V3Z/a3+BAgLKCAwUwGa+s0Akvxx5nz8KBER5U7b+tgVALS/vr4o+G/LVUvnfBcVE
b8pDVCSfM1MjED61tdncr1levjfdp1mfzK9ypxtaWgRobMDgNSaVmZuCfkj8ZE12
6x1ynFKZEJhf1BvqNTELDr4FqTXazb6iSXKeGP7cKxsLXTxSg6gDotVD4Qsc6Xdv
K8vZOopc96gD55UrNNgp5N9RZ2/L0zqD30Ervd7SjxcpZb4ZZLO2eovznDLsSDN2
eptMVbG6AEbyKmB3L4HSrd+uyIoS6xB6wpgsAYAY4XHg0AAanJXAOQlk7AA0/N9h
y9JVJrtpTCz8gK6138sOsL8bHHPe70t7Un8122Sapzt6yPI8B57yORVQG38fym9P
Naf0wQWRo3hG9I1+oK35LTrWehQk86mnXp4jKUGx4CCx3q3trA37SyJBVoDDKPBL
v0BN8B4gZ4q7gplgoS4hr+eevISknZe4S/P1meO7Gy+bVjw9dZoVcZDRh08WKGbo
l55enjo6WTzl7QQtkmbSUYpHzZReiTaF2Xzzhan7eSaOk9gVT8ofebspjQqWp8b/
NG93F1qDrhxas1tclXh2uiC7dRpKZHGscqjr66mgHHJaOpXCsZ/bR8BNuqSVClfC
se+b/bnl4qkZFOaaWjRohzu9sI+Gc/HhkT93kjql8AnNbUciRBcUYkQXhdRpP0uo
g582h5RNwYMoHFbl0cygUJcETYI+xlSiM4h4wOVsTkhs4C39QyUmAMLMxCD4Byva
0DBwHHUkqBdnA4m9jRRuyoAG/ngqhWpKA+q7a0UH8XiU8jE/q3mBsYL2ksR/Ci64
aHKGYQchoSd1gAxGclfSILSG5Nxuwf+p+inwKZpF2pP31H9J/E9sWFEdyomklbpc
Gq69ZrHNAg+TrcBFgppk61iHeXJ23CQRbaGULKdsgjrZchyL+IpXOqEiszgpO2Sl
00C4OGnqk1P5XLk67VwFXjKZpFVxRIauxES0q5vOUos1LG4ymYLZ4ZPu1kIgh1NW
e9unUb5X7tw2sbMdSgd18I2FkFv8HK/o2Qx6x2OwbdhcNqVzLGKCbATZPIpdJOtw
mgxZYQQ7I3JawmA8M11Yi1JCdEFoVBeYRzcNU7WMPwEDC2MaqCXSqUHOe/KZojwN
8KySZjeLHqSRjHCipQKVouyTf2k9k072xV1wyBhP89q+YshHyA7BwTffQYW1FUb+
PPYITLRLraxs1cPLfJnplleu7GC81+3jO4GLjoenx8FTcELGxS/wm0tJ78b9YeKP
kSK1x8Xq63yelxfouWfA2LuIq5Vxq1hJrCL+/dRrxefo2xJQNQLm4WMZ/HQqusfn
nQfPWc3N4CnL0eOLQ/tbl1fOyKljpQ8fPGx0DfjxEHn3KauIZ8lrnvZikOOiVwde
rCKv6GqhBfqydLLg/HOSyjtWd/0bTjM4J1bBy8JMn4aOnfVGeuVT4HdkJ1cZAgGu
ZaXe6nlsS3GKhQ4YaYTKFYhESEpkUaXEWJPpUga+atYgFbK4CtkFr0PH8bxpU0tZ
Osc7eDbH9IVV0HdsWYpU2OB2yXSyp90cSHIPFZPcYLnhp7PP1iFTyW3z8yD3Fmcd
h7dllFL5nyQpCnp5t3CTNLMo1eghJAqrRuMMXp/C6lw+8E/naw3DUdi/WagzULIi
jepWFDlrKwaKHyMWrlr8N9hoEUNyeXw1TB2Nj2qeBNvbarwPrjD8rXCHcndlnI+8
lh7CiewUELbLx7UviPS/4DnDB3DiciLpyBGaJZSOW+EHELPWeGpF5jjZmX+dSGlc
nV0/cHCNlcTFT1VDOblYcwoT0cry8ZmetoAL32gkwMO/0h80YeGbRenMG/JZ4/nr
+ecdeZmyIOcfiXDCruegeZMCCYjgJw14rQufmLzBAN2x8PoG5wBbB/Goev3p610/
4OxCWczD9IT5HONb9wm2IhyeouWCV/dJtgDgRVz1kTQIgCv0aZ8cah1uxen0YXeE
NkNgKwzwcI7p+sDHGi9hz0NjwhN7dk3f6DnGTRO3IeOAhhmQT/qIGs4xG17Z7xBN
sSuISs+hrwPflx492/BdB7HbgprrtNbxblgHA8cOES9C/jAJoi0JYFu49Nnccbzf
g47oI/VE5dqffyEL68H7oK8L58j7jysA2rYld3mA7gTvDpLfsWv7U6cFsTpedwXo
YUpG45BljgoA2tg25sXM4PquAWRSGMoLxV2ftMB3Mz3R2vjjkJJr6sAUH/khD1+Q
eIdDpgWkcwBaOfC17NN1TYGoDdwYeq21ZgVMlqgMXZ/E2Je2LW6pe9PuDvtZNok0
EOdIWBVRNzA78jyIR5aDrDNkbmiDsAsxe7hgb4G+9qlhVZNT8EJyG9DjhDA8CfJ3
QZfuxzqrfaAd1gOUGmDW9KmuiX7OIX6R9oTc1g1XpfNOyzlCrYr43OaLKk6vPuJ+
cQszsLiYfyrYn7XGv0lQPFgePY4RiCoXpJkpiWTvhaBdvOu6A+AV4sH3ESpQPg+K
O898QovOyEgOGcsM3rvjcjHC/63Dw66DVDckrxntvPe9Ghm9g1SpT63iDO3th7+n
8Y3QUzammJoaqJIxPNSg+yckBqc13lJn6xqHa0Cv5Jn5HePTx2eYW1e75qYNlCpj
gZM6vOzY2Ca6hVXzV2vW5ghOgWf3aOaOJzo3efbE6T333utd+Evri/OHO2jYvnef
cLAwVB4mF6OfAquWfQVbK/rXFgbbj95eKKhOaI3CGukGLWZhVZ4RNxihOobAw3N5
EK1f+Y4OL4hfHz51Ck6f1wsMv9+dDtf25Af5d3MvILeRqcQQV/r4J/LSHrfIfvZA
tA1CHHOWTwD8F+YmEN2C1MaMvZFuJ5J/P/cYvD7RL+x0DeCpDvqP24jxD+ZHXU3h
7aVlllxxch2Wb3/CvizX8jY0f4heP32U6YrsYQ9wgwatTH/6xlod/R5OdQwITVim
eTbMga0wuReU3elMg0YbIPi6RZbpWTDqk2gvtNc6zo0sTl7yK9E0OnxLA5I2VNAd
JV90bgOowuhNwPaX1ODtHQqXfUx+8gn+nVlb+hZUypBuGxXN/AEhhwz1PsnUiW6Q
6BtB9U/iFCDzOpZ7ghfkL1CYA3BvghUpdSdG7OvcHw6Ibm1auwApjincUKO2WC94
XPvw2wGtu/xwL3tGb6Or/dzTwFAiX+ej6PxYB/oe3HMzPUGHI1jb/jkp78DZPJf2
ALXbP5FxoHAK3+Tmo2eAyMlMFrw78o+sIS9szNUPWBvtpoPRb6zVaV4UUqJpsE5r
HG3pqhANjOk3IMj6fiJa4619Lm+EvbEvYb7qooWV3h/PJotS0iVo8unaGgyU/HYF
zKvxTjovwVVT9xMcnTTRuMwbbFTEvLSspJyUjIJNI6PDfwynyPrN8xRFx1yoWX01
px8qvVOUtC6XzIvTMabVGb8qZKoyrFxUNCtXZQqsWHSK2g9uWXQUZVfDySIdMZM4
nUxaiSrJK1G5LNlY3cu99ZoPEpcfPdvl6B81uRDFg7flWI3dPK2aqwr0XP+xEf4B
tvVrZkYPSkmjKq4gHUmH7seARqVVUVpMeiEokRXv7lvYKhbkChqNj72gKN6oNqVQ
Sc7YZ9qenlz+AKvt3DBt/cxqp1KjVU6pyPOJw+2AUjnfLhuhUp3rjN9UcQRvGe/f
Qg64NkBM+cCtn0w+nv7bRbUqY9O2DAL+rFVdss0X90MsGb1Yrj+5rISNbl/aOp7h
SFAnqubG6l5bYdVoRfvmvQS2bJLO+iMA69KdHQq1+DjGMe09nVymTBupdfhml6Da
qFTeBGb7sOgfBVXGYNfNy2KZVEnvCCbWfixQqF5fecw2vKrNy5UGE+Bx6cWs7TjS
jGRmqyATLsaMYYdLNzSio2OeLyFu4impvir1/7D3FlB1PMu+MBJIcEKwoBsI7u6u
wQkS3N3d3SFAQnAI7hBcQ5Dg7u7uFtzhsSPn5C/nXr5zz7rrre/lN7v39NRUdVdX
y+ypnj2d5ESwKNCLr0eUyCXnFCce7YhirZsHqZzFpzkpF8zGyZWhvGWN4c80qrqK
EJiJkcwXlIcnK7fyhZmnufDD3bWy5BFNeyypO3i8dAIWwTPx1jXcrrzm1LUVwyO+
nDSvF5jZ28fIBns1NOSvpgRrzpFlzlPmxEZdM52QbT6rYY6aaaFREPLNziyEDtFR
VPh9iRJeZ1obf0Hs/i6DYuBFgse7ELkzcgY3BJMqJBEZCSWCInlxCeuq6LzYy7tA
lTTrftdWfmGGSeyvCFLyUsuMcnKFEJFLQqWL7+PlVldNxROm5LSZJGOGxFVHGNL4
fJkVVuk3GbfonZwUaQblRlhJxnPSGpig3Wjtr77yXRhENYVTVyizXZZMFWMa5+pM
DORMbpWbbJj0vIGzTBKaMozNLiFFDPwkpMCvogiQTu9gBPVIYcWarJULFyQcaD8t
rfOyZzbjGnwKJ3xZNTkSv8tlnYkiZjRHlwNLVl2Bt9FUcJRQ62brE1nF5MwPqxTV
MLRuY9zguMH0Kdk9NlIAh7EWGsbJE16Bz4AF4MUUy+NRHWKbBM72ZmQLa/fwoohz
piHrFKG8I9LjcOCO2Fl0M8SWWLWR0TGeZOq4Alf2xdJGw9BHQDOaJb4ToHgJEf2c
RpKjhzckBSUMoBsbAinR59mcp37UpGPb+UmOSZFJuFZRgVkRclUOtQgxNtJCqphY
FyklgUU1/NOz16qQ1bB0HnxvRpBgy9YnjLdk7YMcHxfzzyxDcjx6fl3TZfu4QoEZ
oI7hWXsUcRgRvNv0niI6MWiRwJb0S0d6eNmMePNnuXGnyI/E24p+frdRAHNAvujL
1aIvww6fMDqqG4/Q+iPkV3XfefpNdBFyO60e2TZ/2pftCPBbcQo0x1Z4t8g7/pFh
8j2NUzkkQEmyT0ohYnNEJ+r5zfxzylSz8hf3P1kpemhSKIJ1QDfpQ96bCvfoU+QK
lBuoNDKQtY/QSMKmL4gWD+HyQDKe2gsgp2bhzYavk6iErMws1RzZtIjZxWuF8aKT
OEQG+UjrT9ANWmWfd2W4Koa8QbsbWSQRcOGdUox+3xMi1Jiji4qKjGaUa9i18hFK
KdgND9v/0oHJfrdhcW1dvcZkMyz1rJ/L6Won7XlmGZr5135HXcOBgWSi3dqvlpYb
I7ns7VknIS/lPpRFq8+hsFFlDqLbCvQd5l7b1mybOrRGWpp1kpvdaa0MVzSQwrT4
dhLSTiNN4KskVDfWqrv26NIQZRNpGBTyUR/Fh4wdHBxRsnDhXg9IEIC4puk+pXvB
huek1yPsr9GW3cU3ZpiPttTqiLr/nH40PXSbcPbkjd066ZOV24vDoyBCpzePWxq9
Xl6sHGs/vkjSZyBbLs0Sl8TSUHwXj6+rR7ocguw70uSN3+eecXlYuD6HANjj/Kr8
hN1ctc5EK2b8Cnku4nir20DdA2cboa6WvlLPTHOj38Fi9tKiJgZtwsffjQa6ssZa
X+m14rhSlSJuqAfF5vMytsuWjbKXtAxWLB3FfGmEzHhjsXhWqNsxUFpY0EGJQTcs
j172jCXsMLb7x1Eijxs5hU8atk1+wWJdLA3pT4TVH6xt7olrNhUuMjMuqgSgslPB
q77IZmBJcXoJk8aR+qJEwFXNhj4C0mbm0WExy0tSKnGyNWgIP/otnKVPJSjjRdar
b2tM2mOxWy0Yfdsg90W6e0hdNhZ9SSfN9QhMpsP82QOYzHE5hpLI3g6PUc8mUb9K
AnmLeNKAS1AiUJMskUK/KmVLi4QymxtiO+cbl/R87pJNuHWqck2+Ly6xN38qepSx
6Q7kJhZm8W/cbz/XrWGgY6H9h/ft17UXH+x9k5OUURJS+uE74rMw1f0b3xs90EP1
YN/bH1eG+YPv7a8rw/wPtv8mpX/ttfu5ngxwHZhv8e+rufziEfy+ksz3b+CaNUAu
4Louv3rovhnlr+b+ew/d31v5L8u3QKtQMtGxACjpmZl+Lt9CS/snB93Dlm/51T9H
+80b+l876Gjp/uChY2b9p4cO+s8LuNB/XyDpF1P8zaqf9D9W/fzpobvPgBnoifxv
XHQVzlCOcoJjp7k1VVUZVbZsdXqbe7Y1z4aCoJSgBKyfvScReMHzhSEeDzSNhuoR
VFoIeCAmZBTJXh+sFb+wnDlbYNAX9BObNiUsaQOZhjjaO9iwdB2cuAtkbL+9/YJp
UDuu5DuP2zun22lWO2NWi9FcWfl1hVGJuyhM505xlZf4equrnG4ZnF5gxTEK6qO4
Ipn0YoGw3VR7n1cO5aaqEkUcNglj1GysyLAjgz4K5ru4KGQO2SLV6jPSvTJSgFAv
vjy8zZc1uiNeWI0pUGOVxznHHKrvdilMMk6+9bRdCE7qdpE91MtvfHM5VrifLMqP
m7f/udRBNMkOSa82nIyArWalpU3DgjfYq+dYKi87MYNY0p4snVDgkvpcLINfOXL7
vM+MGgKeumrUw/gYo4IM51bMrTCwluJs9qIVjVhqsjMWQimCiBrak75H8oOUzc5x
K5qGaWm2MhJhNu6RZfuY0Jtj5F3wVC1f0AHEJ/7RSRi0imSRMpYBsstWr8u1KVip
OFGSlXJXY+bkS07elcdEyxKWnrXFBO7UEYiWIc6zv2Ilb+3OMuEwF0fB/IByK4Sr
qQeQrMydAPuamDKbgsbjTFIeMwdByPv+2PfYsnb0bTAuv2ClUPYxek0OgANM1PuF
4R365SG6G0cUAX++sJC4/uA1AQaZivMjEkw+dkNyQ9yNJyLCJk/3IAl5kbQR0ne0
loaah/itPs/PxRLdBFZ6Vh+DTKITcBs3WLQUTq7dPlXR9xsyjNnLskcklo+XWgaE
Ge+D7MAvIVq8iZEcF59geq9fUMzv/jhyDlTQPqUTz1dcjDwQ6gKbII4q9frESsXf
/0q9tpYM5XmJC9mUll9+0Mu6IRRk/Iby5xwIroSOVOfQRihKDJxRTxPqtMmnTDwd
fSIFh6VnSD7lgNUqHcpUElXimUtUlOGpy6l64fSHc8QHSpRKowiEvsdTX0TAikTu
PZ8WFt/ka9i1clFo1doU6uSRFDHzi5y2YKfI1AoZLk+yDYmlQPEJ1c8Fn93xVLoe
CG/swpfLIF/KyaHlNw637vArFctU7QKziDpkuK0+RqzAv2kOFwnzuE4pF+OfJSUT
PCqTlTU5DWxVpp0zfK+fLhdl3g4yU8jIxYIUJ8Mb+jQ3sIsXi2nOewK1ZWcIRBsc
vQI0ZAREyBhEFE7zNNwWRtTcSzyuPOgyI5ThyVRodayCkhW6HIX/R0demdbYlSgO
mpAbgHjnu21MWiU//aRqAtlnRyGxBShwAZkn5SAtg6u3T6uytXd5cxW3RTsDiVVA
LpdiCwMIHYwNpSPEYDu1SB/7I/p3Rh0uKblXDL4tj+1w175Gu86hQfKIuFOAZeb2
Ll9o+LBUJHGgke1o/QFXghL61n/hWSjrNadc5Ye7cHuCtgveW7qodG+H8xx0t1sm
3HTIr1Xv1CG4INWhbl05zvM8It+GefKePV5Gjdmg8GDFoUwIPm+WfepwKteymGcI
exRz/ibSh8wdQR3kFh832/Ur2hfOheXaZHUIj+jXwxRfb2Svuc/xaFsvbK5BekFw
g1T8oI1nABP11erFBkuRohUxFwgHBufqh7zHm44tAU3EQvgQ7tO8I+3nOrXcSdsO
DFkHAYrEV4/4+I+jF1YWENpNBAl9DvhB79BxV3yCsxWgyDO7cHI5VNWV64WhfcEz
vaa+JPGkJ87DPy5N0Lk5xH5iQvqF1oUH2vDdPFKMyWib7EbEBlp2wZOAckXmJi5K
oSe7yuKROOPacNdCyiBLOTr0hjCG5Bts75+ag7kh2FJuXClLcmtj8mAuSlx6boCn
IQRywQ0+FsBFdOM5NnoyaH0fwUjDDDQH1HhtjCHO8tiCD8IJVPkjXtqDDxbgTXkZ
Pk7DDrSHG4QXYEfc5Sk3CbQH3BPHEaG/bcH+0p7fNgZfsPstDa/Li+RxGlagNZwM
vAAr4ipPpEmgNeCeOI4ICgDjeeT5xDAQ5HuUQQAEGIXTetwE74v95LN/Mfi3qBr/
hNd9dBzxGY84CC1oi69/LIg2WCAUgIih5RGQ+DW0eWiw7TUIK3SHDE+Y8bt0TyyI
FRKAMCPwEMzaNm+7CVG7KQScHX6HpXgZwx5rwkqz3Qt7vHj5HdZje9XmPJ4c4IbB
B/FtG0Uku9/y/NHBtJ8E4gH8GVoQEfl5YEFpM/D8Pe+JIvywYLRPWgCIPhjaiIG8
AEgv9BFEH557Yg7ebVGAv0Y7W6jj+GGBaXxb1YAwxry4hdH1FcPHAxOjt20NwtMM
9UHGjPXh+Bjt0ia1yddCqGfjUxhqlqAwPN28Jryfea94qD1hlXeeaO97v69V7owx
84fwn/V380eDrXHzhwKv2kTbcNg+29QY2D7dJD7mGIjtpYzH9TNJTfxCO+X9VQdR
Hf8JZrkieBHfZ/mvZaPn8gdkhDp0X61o2V/1qJPoXwVP9mmPGS6t0ygd2YLmrdKA
bMv1hE/eVvFUhDdNfhWvwj3v2H0rbHydviMdLCGbJuL+CANyF9QMfNSbjCczhaYD
IS8UGXwsd0VK3ulJLSLyIwieihVrrYSNDhoynZmm05BabbwIw+ziJ9U+B03WxYOO
i2DF60t+5NehRPae0K2FgZxvBCvQXDVmPGBbpbInZK3ueDOSAq/yv9Qs+Rl4qaFT
u/bOG2qJdVDDGLYja4SAom0KWt29CqQMucr2Elz2e4qnFuLfRJLoj31Ca9nCaMub
lyk9ww0zdGHlkfiO6VUqumNW9isJTuwlfMpQntS37YrZPZG2dxkeMXcEG1cO6KjD
y7tfcmDtX3B0RZMZ3fJncntbpnPfXyRWDtzRk5byFvovz3wtDrgDaxTPPe/c75Ru
p8WEQzvq4Zzn0xifnlnAhBzWiWZ55DfMzGs49zTMcffPL2us7EMTcO81dHiI5Lyk
Hes8w/lald70aUOQZY+bGFYtRTv/DqNhifp4HAIe6moIdpBB33oTTws0T6RCHewK
NWDQeaYhwz5Sj6TVf9mft9nPn6iZgr/jnUUH/QrGB6GAQfNyjN42hvTBHOYuIfMX
6TYMrKkCrayNueNhMM4fYtE7lWf6BLFA+ZZ6OoxwcuNeYVqozLRMjRxEjVTipyQp
YmHoGcHE5NZIP5PFNhsZG8zoC6wMxXj/ZmTKMMHYsKHYJrZkWqdD/uJURgg7MZ2C
tNS8RwHbRlqEeS6aUyjEyaKWEpXg7XYepJSPjr2QmslR1aNZZX0Hm+P89qMTw0Jn
qeklyZPOmVhlPPzOGcUE59mlL4KJOjNtlJS9OjNkih9txPeWK6MF8TX2TMJ4d2KJ
/CdN/dBRoCFpdZ5B+KJfv4xAbEbPXMH35KciQV8ZokAeXME3QpWQ1OczPy/gETuy
BAHVbRKwMKKz8Ns0oYul/cKEIIzIQ4asmcgXbOcPFq89XB587R4Yie/5pNldKr+j
v7xtpLRIoEkWf9RAIK+iMiOSS5kRn4exL22Yrg+/w1Wv465K0UI2MlR8vvhiNXpO
WswhJxNtpGCv2rhCeLYGHxF9rpYX+ZEc6VCd9qpxo4vzKFzqnL6dTQ4rDYda843K
QXeao3OOU6y6+eYGlrvSplmY1OusKl/neB0CuJPE0HnD7Wh6M7sxDzGVk7RSyUEF
H/+rqkoMQSsfw3yZ8lGSKWNpjPJK5bFAp/k5VtOMrAmskPwFAg5OOJtqdnZ0E+vJ
K/03UJxM5BuTH25qxXegRN+2ydnkvKzwFJAx0jFKJ2lieyaooDudFcyRYABRlmwg
JY4yGZ741DhtGJwXbD5LgdpU1udNjF1wbhoZTWNV6KTzgWErjrHScAh3xhXjlsa8
R41Q40uR2/7su+kkOEymj/vCxXg1STkSlOozWWMUvkSQ4PFb5mF4+x+Hnd5nrMIl
iFOmd1ohC6U+2kbrDVKMFNTiJQw91l3gv8QDR8sOvH2qYd461TzBbAq6yNLD3GYV
BQhmClsJsFL2FlGyC16uJhuy0igGowwZASNzZGmNCnklANnsk+lTwb+YOpSqzCmK
sMOb5fHWMaqt+1RkBFfNYwo98LRd0zSHcMqFJCkin5HjBf6gIUVNktEpG+Udyvhh
+HVX8Ub66cfxPLTTMYoQaQEtW5ngA5GKet6MlohgQ8UJJXA8tFe5kdGE3kU4GZby
xxyrhscsqx1PP5SQOO0wEI69eBtE13gR8HWlmheJ4aRlk/SSk1wbFENL410Cl4E6
U+Katr27/1ELF5ugw7LjPO8ZzWOUBYYa3zW653QyNVGcsbVkF6CJEg5DzZ3rE5Ur
ESTzL7kz+1Mbk7+2fcw8wmvwdd4E3+QMJsQFEMyKbzK8QaVFOxnY/3qF7LyT9nmD
eGdqZd1w9OW0tAYn4yudw9aVl2RZKqu8sypZBpvwbB3HnVGdjBN4q8Mgb4k8Ylxj
8JHThTdIN5D1lg8/IWeIbQrVvHXKTMa3Z+YUhdJfUxvCmoUxNKKizCQ3JIAbiDiG
WdPcramybY+YF6t/qxT7UnDACM7tS96k622sqWSfZD0/2hB6XfBt8Hy1a+p19V6T
AP9hQGeM5aV7WGYJ/46gmt/eqew4Ia4olw973ROJAME+YXbyDWfncHfJuxSPQ8pO
SlsqSqHuomJVVM2nitcOM93MR71DCbaoztMQZswD5q9IJfuHedlgp6+JJQZcejpL
JzkqvWcbbzt7XVG48TlJdmPcCegv2osdApuKZbg5hR5vvD7GwNZiG9Hom5p0mFS2
p77CS1gguwv0IMJc3V6lXpWtEdHGP9A7vF7JZrG52uCYElDRnBY29D0dLtqsqo66
pmZr3DGFVOnF0SZL0MS1eta/DuOI2/A4ez078yiTPQNt1fjTy3o5dwl3YYcI84DU
9ncsn4hLyA9sl05WbDrHaR0+5nB7w3xgtMXWb9U5BqsLmprP4h5Kbr3mvSmboDvF
Li9NMjNwKMmeJN+xO8VzDsJ+7H7himohlG9yEVU8zFT/Zt5v7G1gArzqq+vwu0QP
ss0M11whZWLOF7lDObZyl/mmMQSHSoe2Tl614pLaumS26xuo20kDu6N1GeyFReNF
Q2ebd/oT+tWN5/myrdm3kSktW77x6I0zjNpEZt6E7gLVj3wp4YeoNQc1+JehLh+l
L+jwKjyp21YkN9E5moTYwR/rrixJmEzc4ToFuMRy+uCkIMyAzKbXhlOvcdbGzH+x
WKtapNLh9ki6+3AHj0YWMTBD6ZeRw6AWT04ZQRVZyIN7aRXlAE7hEnCcYSvgLOus
cZnAECRj0+10COkU4dpwXV2r4a7mkLRnfY0zVpeCOV5XyJ7LnrvunMwlrJF1V3gL
dZMM58wfmjpr+WaR2f+O7rQESwG2Fzz2ygBnrxWjZ1nKOrvWTwKfHS0bHtMZp5WF
oi3vnNr4HRI6Wj5JgLnSDLkBdLV6uLzpo6tJ3jz9ogFUzphi2khikr7bL8QrMReT
xypjvbWHy0MoNRpfAbt+zBgrAee8YwJXTpwaXR6Apy4IFq1nNPNFWZ8nMk05d/Ui
TImuuPL1VDaYZwgp9Zml3Q61qOifJXSHPWNI2V6RP06kVzsfe5LfvHv9OAi3E/VC
+TxbpuYxwSVyXbe7uAaN2iGBIzPUXM5j9TWFnjPMl451VB/LKBXfqju+6z4WNuQe
XoavU+BWmRNo39Q49tpz6skhchw+e2aygtvp8XKMSKykqbhrA+rj51FbeIUel1jC
gHDU3DfFQ8MLYpYXIrvlsDEG8wHjnwlyiTze1XI5SVhT3iBNUCtCXXnDaQmGgMm8
dSl6XSI6p89eDN9/MbZ3g0v/LN/wA5cuDqo+iiJCRE2+rU8Nsd2VHfdgXVYyvMk8
D4K20N3zMlY4TsWXRcMBx8/ptU1r5fjkBxwgbfczuh3F2cRtYt9eFuu/WWhPyHIu
xakw9Tlx9zxxRTdZZrluETx+NpNstSb0ViHNjWDLyCcxZth5yudpbVIowACl1p72
BvumsvR5NQ4JHgTjLHgRI3ziLY+HX0VEvDrhV5heU9KtyxCqFHnDVP+pSRqhBZDR
xjImsQbvOpjYxHhFLhfkavOP0uRUDdu2HlofRJHWiQ2+Mg5p1eq878BtmiZP6NPf
TvGDu2ERVDIFlSdG5Q1gjnuRvwMn8ebKyeJQ30hnie6S8AZdJ63j9fP4oMg2+Eyt
08mTMv2x3pyCwryPserq9gpGL8sdlWW0XqgidiFAXjt9Yp3kKmrf7bLWZ6PbYcpv
/ZCkT4dxzKa0FCKqzFcwC8o4VNAVPvBpPTrYNufxc06N7g0F8A7jm6wQDMRqHGQ3
/ldeK613RLkZL6Lo3/fg5GRfDr3nESNJqR/Dgg4p1YOxipe2MIFvBdvKQE0uan1c
UQ1xoInoyfPGwM6GR2/WC7XiJG8UnHK2N5PQlIXTTNJQ0kLZCAouO5MgPix2C/4E
jv7MNEuw+rPeGg1xOoSanFvqGuooJhjyqMhidJK88VVTX/TajiaNgnJaKSs5P7kc
0uf5HCI+m3J9uRus0RTGZ4o+swWi7GDNhMvgVWFTRoIOI7Vk5XnraZLyW7zYlMZC
yLtM+XsS7RwahDKsp53MHnUMKhiGBx+hnix6eSWAb5039RVplfmk+SvC2oF0NxfM
ghcYXiqEyCWwvMq9blPM7jIXiGCh8K1Qz7yMYev0/dyAKS2RmjWw5bVvr2PoCk5G
WUOEfnYRWbLy6EIZDBw7MTVl6h128AnDOiy7keYgI4E64cKN/kujzmJOAr0JrXwz
Mu1KV84hmPTsrvJYIiptszd9itFQ2Pw2JbivwcnBBzLofbl6EXn3YTEUWcHBPYnb
PF+91hIYy8linQU/jcPHVdPNozJFgIDkIuzxHFgRnu/ZjOsaDNhNfk+CfLTSIyer
1L9ZjRGa19qqHYy+pimeumxKqaambD1KUgR1MmnF/MrHB1DRXMlZEqdH40FDAunY
nsNH/k66impHPBO8HJ9dUvR5n1itSqQmiCyhkphA59gwocHCLF7Pys3SnHepnM5K
T3LvXpepEqesXuGdhJVFXq2ZVQ5cdgJPN8/ZyEez7XMhMnkqWOjPqaZkWfp9m5Gl
rIcCIQZiyqREq4LdfYGAQSOFVZrbYz6jj/BQEa+6Nb0URufczMlCMiF8ZMXWPLSF
4NqKvIQi2iFEdTQas5xT+0IkN+OGlBNPQo+Zy+kRRMywv7LUFuhMfuGZYu5SXuyG
hFTm9xrz2vNKGlwZQ0n15GSgacNdf4twXPEFJhPSluHiOsy04mQMvaY0vrelfHWE
AUt7Gg2e3JQ9rEinWhvadH8jxKZt3Za5VTtzwne5Mhd+PS55kMqJszfqjg97IbRj
2u8cOwX7XMSR/rDrIqL6Dh+kBfFN0abzzqQ0wRxHLhbl1Z0NoLCtfje8XDzOVtZv
QlacE9LygHbel5PvUk4dbnRB4oIBQUfYseAYwanguuGYGf0DSWs3+BjiqEh1kvlU
vxKfBfoqnCjR5oqvgBEka2OHycg2kipbC75uk/8sf1LOjcBN7uXRbvJIP7e8FFzg
tBR+rDpOzxN936cL/m8lITMOIoLD6jM8OagoPpFf1BeCGAhSw5HQwwr5dGo6YKpl
2YSsx8KixUZP7ZfMJ1hpjPkUtu/2f3JPPkm69eWa1WbS6YBdFI9g5dRk1dYbk6nn
73xdOl32uSyzfqdgkuOdWhJnJGcSpQE9Topn1Qz7XlQtIuaBxPxCEF8nVeqqq8t4
DbmUoYxxrGlOURW/2lgFFX3sou1n1SgURsZR6Tnz1dRrkQyaV3VvUDIN9mrtjxRw
ycka9goM5hxdyuhfn113NuAklewciu05CQUnib/g8lhPUuz3EWNK9qQ0Mj+0YMHs
aYvL9S6QVcB0bcNSK+xmpr6a+fBp8a68IUEr76DSmTpQdafuhbXsiuQ+1TzOvOJp
v2uRfsKJs1i02L4dyla2Xmst5oWE69tbpRupkzW0vLnKoxnv4M3nhNFghM4K8l7v
NXy/JKhUVC7oglIb9rYW+Lwyr5BPTOwmGU/KX7slf93XS6kVlQEY9zfqMXop3dlp
+IRs0v4RjoY84hlGfxdkGWGBgKpRivgyyRjLC1FAKknfce3m02UG2XDCNeZ9JpuG
OMLeno+KavL6895kCqOhVnV1H2gVWCmrZ3rn7Mog9lb3Ksw7dwtUh2Pp7mrI16Xc
S81Lt++NGkQiBJqroz0lvhSfmlq/iDxBrDaoE1ZTWmg3qMWZ7COoEt091kokG0RL
JhLGHZOoMipTnOfpIKijxqPLsvUiv65ePWSphmpLuR3axJiMXLWQonPT+jGtt58z
p39pTV5WViUke74IiUb/sbMPV3fQoJCCBOO2hNA8i7VhuUQXPDGXeBVmhg3urvPx
16HH+66rtacVZtg77Iy4qCP2TMnjr4yk1j24tr0+a1dxxKDXnbQdWRvXtY2NnZ/q
VVWs+oKzwqjoE85ZyjlCbxtQFgSOoB43rWDHwnHG7jLNKMCSZYbFckWj2lDYUZ60
WO/Rz1hczuhudU/HtxuIyq/FKcnPOb0qc1JXKDtzj+gkNU+03eSifTRm6zMKSZD9
KVuJ8ilTVxYpE+aF/VoJh8vARu/ux/EQDo9D16uaZydHxFKjdygwSA2d/p2bqyMQ
yz2bchQmxyZDYyxU9mo7ShHp+01cH5UVA+h2wrqgmcfIx0CiebpEraWWutsW9foJ
68VrkefbarOx9HoTnCvnLTvzEjwstWAD5AiYJuc+V9/ozkesqx1MpPdzlmPemAl4
wNBeJUY24zwncDm0yWSs23MfBo922ZHawJFiN2QzfH7yPFTSnopbeD6+ErAP1Q16
AzrfP6TOeEe1S3m07t9PEY2lIhntHd736uNz+cqPaKVhui+VtP2nDjEYzO18jqaR
y3q3DKvsVT6NLmsuzfUmqLWSYb/QtQGXx+hPjl4aHEI+WzFULdFSgm3MOK8ikezG
ho91EpB0cPT9BDMEh6yrp9QI8ZWxvrR21cnkyH6906kyRaZkIk/za64SNgrqPtug
XydHUC7FHkYiTmbH5ILMoemT4kgO7d6g/HLFZlKrTWF4ksdQAdJIfBgBHxYOhtOS
NeEChcERobHs0uitqjS3AknNKqNNYZkMY1xLdLQJbY16VVAUO8kwKoLXCqBDMtUe
tXVtlXQUhghtKwllrp3kkHfZxoKCsrCxyyu8Qx5x1dR/1N2S4nBEHZu95uMW1DBf
7c86/0EX/oZUcGpsuPyjdI3zpuDJSQglmctCqsH+OcEaH8NBWcvi/j5LjFqlUfcH
1urq1WorglPktXrHfFMsgmcccvxCyj7axswHBUSjDOZsxpcTGUcJNRIq4vwdAy+d
wdVZkfRr+ISt5t7nwFAT10lavBuuxmvSneChhYDJ0y0qwWNcTZelxqWdlrIryI+x
tXx8PozVFDUo7mgDOdVaG3RmZWDp2RkUodEXQaBR71PSAH4GTdujgLarwOEv7rBG
t2ycHvJWW76NzKWsZPLUSy0b7Rk+c7NmxUbv5qai9wdB1YxH0Hmni7jW0kH9BOXW
q2hycM7+HLX9NjPN3Kc0UsrOLaatoqEqFPp4WuC6HT1hzTbOs7JTRZ+RLqeJd5cY
oZPROVP1DC1kbfk+zueOYsLqywXJDG6XDSRoon5Qxel/rxN0BoM61rv7Ns2mBtvC
nrP4S/9R0lbioDs/x2IMAfcEt8EJ3PwznRICqzhXamfjAFxnHlYTobVPcTMyhKNK
W3T5pQmZn6I/xfVO3nUxUY5Scy4nS6LfRoVSBzgvei2x+XwVDibnxCaWchjY2PbZ
74zVr5jCt/+89m7oypBc+XCNKYPjtuYi4mQj9ib268ujEg4Gi5GUOsvFcF/uGkWP
g/Gbp3Z6aQYbGBxIjSZo0DHHUcJTjcdR/a4OIQctnSV9iTADeuO7aEUT9sNdYpXp
+bv5SB6iH0Q/iNTO1qyMPB6a6JjDDeO4/WoOO9A7MTFi7ObBR1rzul1coVLRocTc
R5LMxlb5tcoVlnV8p/5pwoWkzVAPZg9MzwxHFzPZMCxkSFXLiZGgbmlCl4Qb0eTK
9NLE7kI3tgrWFZYwdmmz5FMiqIAPfQdFj/ir07/qM4SUYO28Ld5WPKtY5BxcTfQI
4dDOYhLXLt+27DJYyvRDwDB3HchBxWUdItNvyYFpTiz1nU6Bc4bERCLgWB9a25uA
WP/AaSITh/XpbGhtS6rf2JXuAOG4BMt9PIwL9Sgm0srNn0uXwtagmv+Mdc9mTsXR
oaRzwdTOup23O/bEoPGML1lFcmU7Wyla0ZnSIXt+25HDo8fUEJYUojdc7PC1oLn9
zE4t6d0lmKxZhuB8PFd/6ZcxDNMu5hU0ZCHj3tHGrestaTsv3uSsbhoIzmg+G3d3
9w7pd0WRH5k1dmuJtvOMMIOrDGalr3nGZluvjs4CKFQmJc8Kkq7eeKh+jN6Y5Y1B
gpX/FInlKmVf4qDWI28EWxng4O+keLCi4OemfZRavUg6JaboBEVOrkXo1GjNXva6
NGVtyCwLMpRfwLJVt1QunNn5JIfm4mW1hFk2bUVaWmxAsqaSIDFpRbh03knIZtwb
wUMT74JGeFSbIm2TGWJL6pW1UurY/jd0lPrqKyph0/tjacf2uEcV+hgYknaL1M2L
hewSattfGVm5L7rD07RNM19x4GrUCB9CCzhrt2hIZ2bWaef7US9MBqoaazFeFFyc
Ke113b29nl/Z9rnQf0NxJcCd1Dr9hqzVxbRFbQqkkNWZMhG3EEm182Rx1++NA8Tr
fWvm6a4welW7qfCtttE0Hv0aQGcsXbJupSoXlc0gRIx3nlqUOcRJDUot54yonVmU
ys6LWVFHDLARE5urComEHfUl2YVeU66xPbHLc7n18aDduFOsN02I21xPE1jCUfdx
HGZHYMgxhrGoC5qHCdVFtKdPbVoj9wyLUfCehBFxs2nm0rP32uFjMI838uHCZ48b
FZG4LgUP1hT2FDvCaZko+N1gEmHbW0wMf7LLHX+Fak9aWg3RPEb4qs81jFxBXR3T
Xr9XgsNucc1hzmWdWTCony7aoZASYUVg4k1JnxSX+xUy+Rsq5VeRsqgd1vrlverO
d19Spx3Ek2dXHPwOS62pksbthxMtchQFb1fmz7FrcJdMD+PpKHlAUUUT9BOMEg1C
J2HnKA5FCims2ekSe3YXJNfCxf0ZfCYJeswIzt6p2InNai5PnIXRsSa1+nZjpVJY
xTfh9H0wJxMjJyDT6V4kBKQiO2UETpe8yG/8NP2pn9SOvYrtcaJwYnsim/VUIqjB
J1l7Z7fXCIlzvFW5FV+flS0Qt3XEYSU/zU+mllRlmZ7gPoAe9yaA46CyR2gvxu3I
KV98yuWv50f3IV5itslwSTPiaV7hR3iDrxLLm36sfkcc5IWcFrJqNZs127FSYeIv
2CoFbUrnSQtVJ+huzO11l3qFny3dyVcQK4k0SLXeUjIQUC7aVz136F5fSujnc32j
7G0hh2ZoHYJVXOzY8ppmi8VD6yMjqlmttUS/XqaECbUKYwO44B1cfD9U9l+fGfr2
QAYwwsJI949/7NHT/yCSmGnpSMkCFPSsbYwszAG0NFS0DFT0AFUSPjsjU10ALYsA
LQ2rKilAxk7L2tYZIC0gxG9hbqvnaEv6j6QYfiYlwEZHQ0dLw0DHSstAS0dHo0xD
Q3z/+Qfnr0+LSFtb6Nrp6FkDn0v59rwI/73OtvcqCGjZ6gG+pXlPlLDQ/fX4n0+e
OFrr6UPTAOgZoWn+AQATIyM9I0Af8J3GwMzExAT4fsb8B42GnpWJ9k80Wrr78Gc+
GhrgU0R/pNGzMvyFj4GGifHPNGZWRoY/01hpWen/nC8t619kaeloGVj+RKNnoWP5
c7709Pc2/nMeDHTMf8mXgf6v5WCgZ2L+C40B+B/OP9OY/kJjZgXW159prDR/prHS
Mv9FlpUO+PjaH2j3NmD4s8739cHyVxoTzZ/rkpaO5S/1e28Xpj/nQU/P9Bcb0NOz
sPyFj+U+k7/QmP6mPlhp/1xvDMyMwH8r/pnG8Oc87tsk3S9ls7XWMjLVs/7WIWSN
nO/bOSOA+pWFhS2A7keveGmubwH4/tgV9UsBgAqAg4VZX5+Riem+dmi0GVhpgYky
sTDQ6jKz0NPT6rDQcEH/9yzfn2ezsb3v0t86EgMzMwMtNCGhoJQQNBQIAwgIiLy5
pZaRtZ4uwBZgq2djC7DQB0gLAiSEXgJjctaWdPfke+3N7juwpYWNka2RvR4INAgF
KMgfcHePR2Df93888/8mgGb4aaNH94ENBPH++ynIHQjo/Xb1neOuGoTix3mof0h+
x9Mf4c9gB3ly/w1MGCjF8U0e+j5AgHxP8V8B8sf5JwDX+xjO/weJ/zQ4QTDuUwYD
gf1eoG+A+7EHnk8BEfl2/nv4lesnx6/4VfLvwAUCLAfQYqAgWyA/y/6d8j0HcJDv
tgTaA8j7+D4AbQysEaBlYUC+awHMCf4+INyH73UJAoJ0H57dB+T7gHIfUO8D2n1A
vw/P7wOwpJj3Aes+YN8HbhAAyPccgTl/ax6QQNnv+gPPAWk839KX09K2M9WyBljr
2diZ2tr8IvsPPPnOD5QFpgcEz/dU/54ZyPRgZuDxg5mBBnww88+W9yDmn83wQczA
uvsvmYGHwAC4rzJgJQP1Bu6/MwPNLmhja2T27ecJQNrUwvZfZARsHH+TETQAAPJX
ZmAr+pUZBvBfMAOb24OZge3ywczABvxgZmBLfzAzsEs8mBlo5AczAzvZg5mBvfHB
zMBu+2BmYB99MDNwIHgwM3DEeDAzcGh5MDNwDHowM3CwejAzcFR7MDNw+HswM3Cc
fDAzcED9G2YhEJH7AQbyySMQTWAj/o3f+I3/XwDYvf8wCPwAcBD4d6Bxf/nXAAH+
xPjzmb/Dvsf/rfufNgGWBfiDBrgH4sdPJyDfvxWAaYx8SynuW7pAZH27Fn4baEG+
jcLfAvBsNogbyD/rB8hxe58I8AIuDbDXMrXTA5B8v8Mk/cHy7yMuJtXU66sZ9336
d7d3IE+BGQPxTxWA2f+qgi3AGvib7mcC/3OccJUlSVgi8XxXAfRvVABeln5V4RXA
xspO6/5G+2cS/1MA6AlOaY83flgB7G9U+GmJnyoIGOnr61nrmevoAbT1bB309MwB
Znpa5jY/U/z3EKvzwwrgf6MCsGX8qoK4hYOeNUDHwlzfSPebIqZGZka2P5P6N0Do
mjbRo/3qhwqP/kYF4O3GryrIW1r+Z1XYayyMiLs1+6ECxN+oAOyJv6og9J9ujpqK
Ib5DbTA/VID8GxWAt0Z/2ymF/kOd0lHv1IxNffRHc3z8DxVy/+HjAJ75yf1ThZ/H
P0cUIB4m8fNnHxAPk/j12vEwid9aAfEwid9aAfEwid9aAfEwid9aAfEwid9aAfEw
id9aAfEwid9aAfEwid9aAfEwid9aAfEwif9treAAwHsioBcZmPPPALyZegHy3YtP
ch9YfhwDzwFpQADd1AI6tpTUlAB7GyrAazkPcChQcGjQx6DfywD8/nkLD4wDc/15
hwTEIg+rJ1B3MJCVb2VY9PyXM9W80vw/p6r5WF49eKYaAuyPdvh/GUAz/LQRsHa/
z1Tv31PBQB4yU33P+e2G8s9g/8YNxD9nqX9Om/0r/Jwp++cs9UMl/tPg/NF7Ur75
t763RpDfM8hApgczA48fzPxzaHoQ8/9FM8g/K/s78+8Z5O948nsG+Rc8+T2D/Aue
/J5B/o3f+I3/fQC79x8GgR8ADgL/Dn7PIP/XAZjG9xnkv7///DO+Db8/8DCJn0M3
EA+T+LX+HybxWysgHibxWysgHibxWysgHibxWysgHibxWysgHibxWysgHibxWysg
HibxWysgHibxWysgHibxv63VP2eBgOkAc/8ZXoD8z2eBVDdOYUvdFv52FoiVZ9ET
mCcYiCYI1j0x8pdzQADnLH6d2/mvSvSfBCjQdQuqeR+D/lbm7/YEB33ybU8Fiv5t
D3ZfSuD+MSj4N281LBjwH2jAGMy3CgFK8iMAQHq+pfjTIt/3QIv+09KAb7S/A7DA
3+sKHOHJL3S6b/X1rwCFcFQHAkIoLSBESUtFD03Ysnq4up19lDLQ0gb98//dv7zk
n/H7P1L/u5f676p2hmG1P60bfz1Ssk7TPOUMDouOVPcF0lRMH5NNkWuCgVQ0Npww
7AX/pXPDGT6+SfdWIc4hD3qGZ25sV0/OBD0BvvB8THLMfIz8ZLndJJb96p5ivZu8
u4y7CpfLrWIMNW53jatrEJSZfBTC5csNdcRklNvP1PORRTAUhqa8Zm+SbnDQ653F
37A3W2uAGZ66UFYSRx+5UMaAa6VaaDs1r86DYzZYdz/mvj1MvT6WGwttMOuqMd6v
ubFSGWs/PJbmYk8Uady0uzjTPqpKOKysMenqrQJ1RfvCDX7O5llVBHbpALIqkbvK
PYPsfNowfVW+dBCQcIi7uvl21ULqHSlUIQmr5eBaNcmhKlZ8oenZM6qu3s2sj9s1
My/e36Ec3zjKonucHRD1OmGWn5py3qKXDdm+o2zD4XUP72hg30swc3j07HnHxHvr
Jpr4ZoWaTwEoZt36nykNMRzjrUQwhrYiyqF8Upi6z1IkhrVpsJGC5++4Kz5txO2F
I1i7HZlAgtp0rWTuzSwmdn5KXkls/cI+L5/cqp/XsLmffwIFo/JUZ8zJoOS5Y7Zw
8or56/soVHOGw2kj4XJEXfJaXdmTky52ytP6dAfUZcUr+KljRKbRueMzximKsX10
tIpN3brHZmxZH5nQ6obtOwPcP2cIm7O//ZgoPNZYfwGfdCETczPnrDXPkd09B2Mz
MEIPAznXWX8xSG8VfTXAOVwlNM1sVtVSr/SFNZXraOjtXOezz8m93Ihua66lHmeD
7K+T7g/MkqaZFwMrLYjemppMM4evk6ntHvWeBJBeMg/CY6ltFFMiDK6VaSLA4NAL
xGj7K1hbBjb1TZmQ0o9MSVg6IoyEWfnW1ExHaWBu92sAqqYtEnTaxS/Nkw/rbhYH
yqcrHQ84Epxfr+5ZVvlhyVEBOsSLprewEeLA9rvROryVVKS5nswZj6BCF1Gq8grF
EadXmzmWEmGbraa40Ru0xM4wGJV+udbVX439UG1Fwx3n90Tc3uodrBcXa4SM5mGJ
pO4TjjefCtn72gaxreS+XmzucuEVQaxns0ecFMYkN15s9um7GbrseNPWpfiv5z5b
VdsdsvXp17aIX55FRRVXgGjOM+QVm6gCt4Puk3JQSHCLJS6G+RZLV6oOfBqyKfbx
VeACWhZPoFi0VZUmUkQncepRxCKL19SX1U3dZxDFseaa3G65LVUL/iThPWmN3phD
nw/k6TNS3jd8gqWTBPSxM8O/57CMJ/N+tu15tCDQRMFSUjqGJU0mK/8+nGRI5dGX
5afJ6zm8FrDmuQR9piCzaJBW9APiCPUlwfThJOxEPKoRXy3Bgw4eN6/QY38ONYYT
SyC6mzZ3mUmv76J2+Ax9R5Sp8ATGVFAwFPa57DUrWQWd5zrz82khnGDkYyi5xwM4
/TK5dsWNNGs61J4T4IdHiM+MhfPTzaaK9A1zEwsFV0DfS/KIGapgI8g/HgsOp7dp
SBjncXD4rKaC3e3MXuhlvpVweBw6qtDpltplm0injhKfuC1dRopG9jTzJRIBVMoE
lt6UuUJW7/sJO/ol6ViOXB6V45e6ZBgZXVJ56ikfS2bnKlbXIuQiJOVTGa7WNdQF
9dAqNupPbSRPFoYlORst4Qiytg5aNg1aznlOjl7tb5CIH4QOoIKX80iVSx+F3eVc
muV7+Dob9ObXo6Me8J/saqVd6n+8NH3rFUA3SNqAeucb8ipnDiScTBH2JJ29hll/
8yIL3ZZgrDtoQt/QbsO2XCpmOGfyqfXU6HJab5YaIbFBQ0xYihq4KClxxJdqXPDO
WMGPDuGkVpbh64PO51IgnROyr5fwnARGbrmwKwn70LmhmDffgJcOWeMGGqBzgwsn
H62mhB8kC25znQgs95OdDEhEThXI5U04yHub8e4ORpG99H1U23n6KLMv8GrzwBzC
KQtMNowk1Xor8ZNQ3REi2Kx6zMmxIYxsRSpjInH5a/IAg9yXLrQchYVEiZ96T8Gu
Zjhmkc1e04lmYofHGtaLsttgfCKXyFVZtWnVX7Gppy2YsUoRdGCja5ZtL4m6PkEv
sRXE8jOKLfH1zRKZz5ecNi6d3VHYkqs9i3/xgo8fWlcD7Ck9bXlVxAccqRlDT2N/
pGx0/osk5jgMP0+ZBIOyBgBOUpr4I/0D7Q9Nk69RQ5ESO5fxsrYdYpPoXrTHnRbH
T22cbMf1vTY82W6dnvC5llMwtewaEjHl4H4BwJ4Z8C1TZ79k6SYuTWs4A1HIJC2B
TbW13+R9OzonE8KUIUbSfwkpsyqlPdmbM7dPVG8l0qVRvwfKJZixOXOGX4KFhF5y
W/7sPJKuhW349fwz+JvWI3qsQQSHaoGn1O6iCrTcgTzrN2aB9O3wXwnhHntU16eq
mgwl8q+xceud7Qth1Hsi5STZjvWZnDt+qD6jNXJk7WbgjHd5Y5VXo6WDRPD+i0Cz
lNU+qd7L5jow/vAD1RHLkk7jiQ+sCmcOOjg47/Vqb5y2tiZ7ZE27EVu4Wr6sDLuH
6dIy+3gZhfSABPYBOEweGczU1vDPppJKUQuvDcxV9BbOpR/6py5C5EmozSI317rg
XaSNce5mrQ7jkIDE8IvwGOwTQ1yRarVCmziGF9q5oVix66EZbVRobItSqxONZncO
VkgxHdvEitcQrnW/6TWBeK7KDJ6y+8IM54bw4/MlnrNVfc3GYpiUC/kQ+UZwyRmM
l9SWkIz8t4dr47I6UTXSr4Nh7Nxxi5iGrVFm+bYZFFz8SyOJPjKPi5HQQ8LAUys8
6VCu2C9ulKK0byj6DL4T5pfWmJkmwZmLTKlEAQXPvjpcLYyNR+CfPWlahd0+hsJ0
hfbanC5cl6sqU8W4K2mY0a+4/84fL4O0ijYyhO25Md3asZ9uj5Y1uA5DRLd5rDs2
furzyYXyphBRTRffT6ld1UU5rnwUz5lU5GLLIPhGxrTAYzA41fN0lnkTQU/EozE4
b1ZQQnHET6ma+NIf90UVhp3EomFwNns7ck9icho/oWByhhyenDnQ79RON6Bxk0h/
PJzYa5puMBW8WWKAyTms36nJhslpyWlP7B+Kg+U/EfwRoTjQTNbCwfIlnzPztiAk
F0bbblIhBaaRclZyWX14v/56avGkMd+HZLNZ2ATzr4euon1X1PhtC+7uWTGga2kx
tLuW3qq5S8Zrqsg6a++eu/e+pXRwrqvO3v4wCHvQq9rqnrj3jqjMyDsLGo+Rp2ZI
GYMCgdw7r7FRn/9OpVw77WKRHEZ7kaxSIfCttOayBae5itaRN5mKV6yZRkujTW2S
S6xfkmqlTTfOx/ZISb61ty6qr73cHJMV9zndDeuFoevO4KvmXKQHXPZ1NzlvNPRg
U04li+YC8k14z2tCHa/GhGo9TAhsF3hQC5QxD7I+FhwUfhRqomREglPEPFDID+3A
7jUYMRMsCtqzNszfdV/VAOe5fl2eY7xvwhtjyKwU8OZdoQwKVu+1xJdrLLAbISFG
Fqa379qjxnnCoCcfOdUHodriieze2KvzdlA7E9qiSYo6QXup2sK926aH6ThChiQw
5CIyfrS5FyAEEd4Uq4Vb3h+I+Zm46cQXui80Kguz4WXT82BwDJTylk9V8FbFCQxP
lZBrkD5ZcXF+hozpC3VEZEbNRSpQgn6cqzDmXMgDL5dvMSTuvB4J3ovj0mamxsjB
bcVvWowH/cFMMwLCvWnQ+xqqHc3wWSPaEhtMw0KqSamgZMMCbygMRRYKGuq5UQAM
xwQlFUlHuYYBbSEBNBVV+IeB/pJtyutAzZZEMbHrlXRC75joF0qtm8JiS/Hd58f0
UQq+ylRPXeNo2C/Qr5plBzQ/x5OVHJBTX4rednWH0DScphH6vkZce61R/qKwXndy
/y3JOnUDbGDe21q+jG46yEuUqAMjq+KUySOwSFR0lvrhpjir4mK47j35Fkb6kd3C
y2dMy89ESiQWiPu1bnCbBW22Opo3wxvdxvECnvNNBFoi+DoIcnhOFTyFzNwCmbSR
LjB6K8lpteLLG72tjFDlbYmyNIefDdCIbbilEUCiVcGTmB/Z+LrdhhgWIFZx9oXZ
JFDPgsf1cPKouhgRaiXZfX1zB/f6OTgpbyjZS1jXYDB6bwA0rkci/hs5JsL4gyUz
UXPcIcWu0AZ611Yit0PaKGcwXueDZ2PU4ycX2a4fkyeSyPVO2N8CPttrbvlP5Xx8
V4MpEJ+a/5ht95j5Gd/r+iojqoMp2LBTm6CYhufqPDTUvdJnKuneQlcLcXRtIuPN
Js/VPpnUEU3gD1dwN19JGG4S6k6ImSLVbXDrs1siXTvAHFmIYpEXtEykf3ZbO7Vi
b2EqqMmuFxVpWtGlC//QYkXt967h5OvVmWetDgWr2igWbqeRIv9uF7F9uw/VuhCH
J2a2dHpQU8p4ReFZfKpkrhBEaHn9VPOiY9zS15ySkGV0Cs2jViPBGICIQ5vAx5EX
SLTKxW4zn4MYI1zsn+Q6idQ/eleA7vCxicdKKYE22nfrYEw3yn80mEAI1EvmSGSm
xI/g6QANd/TaBX5zjP/o3cI7z2wo95d7bhHdq2ER+FP3xkFAkhBJi+IIFxAsEsh/
Zs6xSamkgODDDybEAcffsSK1Ww6iNajqHkS847UM31y1kZdUT3r8elg25u078gIf
jmVh2/e44TFP7BPRxoKfMOlS1weUztV19K6cJtssg5p6JRippM1cP7/qedWgi/xF
QE/bGyQXxjgRrdbm9RltvoRPJXn+iM4srPmszOQRHePMNJW3qswrqvR2BdMhppD3
1g3sH+SpnsPhfSUV0st3Y3WPt06kJkLAnAXXI7tSjLI+4FhjneJY7SIUaIZQp1qi
dWZdLYWIRux9VahqTn/NR7Qan5weAJN2KBDfl6HKn6ZPitZDE2EdWk8n8emQtd0w
CK1EYMK6y4+QVCwhUzUG6v5LcmKyyYbIDqErruIs0wCZgT5z3WvaaS/9sLhxXeGd
jJR7edOCe+t5mmul9V6VpdUu260whtgnqJ0Z62egFhQSrM4rRpEOJB2SNuiL6cuQ
Cc3igp/gI9BUo9r3RHOVSAgyeAJgPufB2zAQMnsF2wgHvctrYTI+MWisyOuYKMfk
acGoZthS1EGBar1bbaEFHYr/ohPJJBM3Nv5Msj3sWh2x+Wj9Drze+rXAX9+yBrwj
/vY2NBYa+n+s1vjLjfP3hQKltQy+fVsDV+778YqnV3o2FnbWOno2AODqhMA3oQFf
sGZuawP4+RI0PV0jLT4LR4AKcOVBeppvQQ36ny9DA8r98l41HVk9W4DKfVRA6D5f
PUdbgBowUVMLa1lLLR09AJCN34YOAFz2EJidDT0AuKzktygtgBkYvU8cQC3oaCss
awt8/RpQQviejfaHysL30rQ/tBO2YQAA34f1PU4LoP1eCmACwJUDvxde7p4OVP4V
MH6fzo81AuXk7tP5uajgL293+5bPHy33T2WodbQANFQsDMy0v0r86qT4O4k/MP+s
rH/FfJ8846/8vxr4b/l/ZQYa8E/uEtofppa8r3NqXqDPxPybqICevZGO3ithvv/e
leInrxKIKY9+G8HaCf25b3hqlDKDv86W9LNYJcpsZnm8SkS5CUbp5Cgqb1lEhG7P
zos+8SEYNzLvpTf59S95a+son3gPOTeOPb56lSut4LCNT8JV7shLcixYdcAeoUuk
ZJyg1+96dDN/YbGe/DzNq4KvrvAKJY2wmcmmM+dwZlCn6wvbxSYeRoYMBkWOAuf7
3j4kdz7ywpsGFe53UjSvifdM919bfMKksBYjPJx9XK9QPkK48EzAq8x4tjwI0r9R
CrdqG+wNlr/EiyfXaV9WmfxD/dGmzxmFI/pbU1hhKPKj+J46Qji6lgRQny3Yw0t/
kXqPOTMiJ3iMbzImGt+Hze/yKeCTsBNzdQazdNnRtJddR14fdpsdbEXDK4oWiKRH
6jIwQawLwp5FjBV+4o/nC6cHsb7qCNwmhm65PnJktszTxfnw2B+3Qckoo+Y8UTbq
umyhyuuuTbEHa3NHTbYA3fkle+N84dfyDYtAkVcM7In3vJueSt1QnNbvRAVxpEDe
gjeoF2Cjsn7JPo4b/fCstsNgV46Q6BD5ejUGOqD0S/qXBmtO0uNAwhuVqrJELMWO
AXp8Ku0SlqoPzosBfjuiXBA4VnHmCRd96pWqQ/BZ7JdSZPqiX7X3K2r2ekisYc57
hSRHwhS9Or3jRMCaDQDdoU6DUl4J5QvkiNkYlNrynSkSr0iEXwYvKRM/i0YyyvBZ
LLamwXJQ6/Ut608jcwyND+ttireL3E1UK+DTK4ZUcygna+XDlQFPIjt+PBG8LZuK
voex0HW3nJ3YHRqWjIGppVWJdnc1QTHdnzUJS7pDesrA/mVJ02CCa9wB1aUGJcjV
HCA63d8d2IE9C2bcEIhhRqZ5AxGMoVQYUF9I8ZapjaP7+RGERN1h2zxn3VBx2RYZ
0SWb84o6J8I1ajWOYmsNzoSlG4lXMhjmuYqwRa2ycVLdsJ7VKwzJ8rHsaWdUNflH
UVt9fYS2vPy9tdlrQeq4MZIeFyloZlGJLrdbA5nDhDpOIzqCaOf5cSrP2ej3ShZx
mz38Xzfv+3HD3lHVUbqRuREmxnDFUEXgq72jEtUQmxfFFdOovvzc+87l9AUdmg3h
IerwaEFx1XisIiuZRQxu9PIh/IWM05g86WEgB2H2ilqxqUN/b4JFZpX18SpJmt2V
zbriktKgqhQL+PxNLEjvmwlm8KMOxfTlr0Zp89pzsGxQZvsR47mBfhPIYhZxe0a0
R2rzjQI0OCHvkGawP0BJQiBAzbhF+3zWTGiM3+iFO1okuyRbZeLGqydGzh+Vilf+
pE3u0rRIHPWEy031JebWSvWrAbtWWqXgTkpzJier9y0OsjsENXE29QH1Zq85+tz9
De80HM/c9q3aMQTIUQc7lnGY/R1WwfeREl34zGJ7K7kPL+oJSkVdzljO6lNJ5jS4
q5SZD3AwHd8YHvUqbCefqRT0Iix4+Gx43+KmJLvK//Uy9W0k+hahYWb9SfxJu79m
vOTnBy4RrAv4Noy9Aqj9Q/DnysO/DGt0P4b0/8GwlhjtICc7iRrQX8dcN4CEDyA8
xnCGAgyxi6A8kgl66SkN5u9LZC8AIYT8lFRBV+4LqHAAvo4gMoyPt/Y41CGidFuj
jIDg6myICdR+AePRXPxNu9L85HrV+KTBvtt4DYj0tfejJltFUE+GVEXkve1GVaRn
3S1nYOiIoPCKoF8W9fUfCZ8LgI1c13HGxeWItJWd7lF56n6epmiQJrIZu/MIx2fm
fwEJAi04ysThToS2ChYpW9b6nO7uUddxFCnd/yHsG6A0WZaEW9M9bU7btm1M27Zt
27Zt27Ztd0/btt39z9z77r63Z/c/e+rLUxlZgczKqPoiMvJUBNHRI+eC51Xg7w1U
WzwWH1K0j6YkE+/noqtOoXUwZkW0y2ymEe3kR4DkaqQQbRvne4AZdiqIpgEcPJHO
zz9nSADQIqVqTxwR51qE0gsioV2G3gIBfE8YYOuwgwl/YTPJAnApMt4PAwkV1SuC
X04xPTgeMXq9qZd/0aOjSOiX3AlxkZi+b4CKokXxqbZOEgQkUrVMNYm9qMS8uFBd
OjR56V7ZwvaS/+AacXtTvCE+n87ii8hS3bI4r6DpRAZ4JFRLx6rvSlQEaLAE5T3Y
qZC+wgW4/QbQsJlxhx1koRU3sAtFAhl+fm5hD5htTk1xzPKW7Wc91h3E9pQ6fvmm
xFGEwuNLIPqDwVDwoKi4SPznxAQUTPK0wccT3NdeD5vp5Gg/ZUZ2D8pN4LGi7HEC
eECoSXsgp69KDLUBRID34o43KjMJGJpXpjmSiaM2gGcgm0yLKNiINReAAAEwoRWP
G5DnmTocHcRIV4dJZWy1fTS92+fRKw6kRpjVjgQfvvzhI1S0gR1RHiVa/laARS8Q
QgyYQw4Eoy81LRClDjSmD4MN8CYuQICPCBxwEjC1CJApL0gdH/cvAAg+ul+ATv5m
NgALvm4zIFJ+zDagGiDKPdA2kFA+wrwQQb3itICbvqbf/a7hfuTxlcUgF8Cm8i/B
Yah9dxXgk2FFAh4UCI2Bi+N9mSEuQSX3L8sVkOG6J3BAb/uu6f+aAzaDywj6AegZ
AJ8CNK8L/QugyWelhgPzu3Df+PZPlx8ZYCg9aztiLcjcMM19KDsY1wCUgdp98d95
R74DzwqpfMe4+ckfo0IICI9nHotfAFQqmBYDU4DRGikSa7sPDBqcq5uCijyEthes
GrGjp6S7pCdGu5iin6IkgXLIbATH4PviV6i3WFukQlLB4wTODJ8eSTWgpBOto16T
XAv8S/ecAxNmuAdtF9PGqwVVg96KqQqkGXY5ot3nrB96h/jGpYN8E+nKD7bX/lrP
A68LwhvTG3srGmeomyQGXA3E3A8WLwmX0IJQAQ79+9H3jwD4PkZZ3xJpB/wgONcB
DT2y2qhffB2imMRS8UiiQYQocoRkqQ2+CqJm+JrEXMSdePGj7AbCdqiqvFrSVYTZ
uNpEsHE8MgmkxEjSYpiC/CtSbGKtvK68rgKFctAlVgsqZSltmWrSnT89xTxphOMZ
ku+S90Yr48tjzRPPkt2JpBOWk52TtamzSbTxvMU+i95bgGR7eXvlffNrlHKFdhr6
uAJFBdPyEvVC9NL0QvX8d5kGZYk64nzjmhGkS3lPauaICvHQ+ecLXedaGiQb2FcN
V2mxhFkK3ubjTwbvcY4778ENiQzVD0gPMA/QD+rH5ED7aHWeGeTQCiPiI9ojou8Y
D1un96bXmKtNtb46yBJfyK3IPRLxE40SAROjyyQUrReRFjPLLMukF2jNiM10zVbM
3hapyyOni6eds6YztRm/9t+DT2vaQt1aXs0e+k+5TuPR09C70NHQFdGTGYeY0NKs
0kbTDtKOGIcbTNQgG0HUDtSOGrVoE1MvJxSMiOrD2XIrqy6KqWa5CzbKuSr1S+pV
jPOl6qcQNeOo1Vn4mjWa5Z35pcVpVGi0q2WvcrllsyuzC7qFu9W9x3pmcFd1wvnS
e0tyw3K7dbN083f0Ccpiy2fJ89XyOYZY9Ztsw26499SJa0IzReNEI0cl5X8tbCro
tE03TEOZH5oQM5YztQ/n1ayrqlYILeWw9XOOeOS7pr9QQHKFq4RnIm8ga1NeUMpT
nVHiqJKpflOxbDitee1fHUgz19T3HA4y29OvnyraOGysLKXacuq+8ORI06zZQG6X
ap9+hHnEfyN+owPjCnYJ7oR5+uXgRNoe4LkIf3a80zJ1E7EHRuJOUjsvWryVqTpF
NgU9lQ8JhXKNskCFajdru9OCaRdLbUAdoe1ik7uguJa4p3b2OiG5HHnkNGA5sPGL
a+Wj5Y0CVhw2Vjh8OKE4/gh9GlIrJLlaOVa5ujnuSe/K7KqYm507lDuSG7HLqavc
k+ZZ9wPow+l14275+uh1+U0ahBWkAvwYogBECEQJjBuSHhzhmyNIfy9gb7sfDs2c
NqHGAjIQ/7uAUyAnOBOU5o9Xe1RqSsYK4nPXFkUXLxdnECo9wZ8CA+0i0SNzI8Lh
kcjiyM5Co8KDgovCkoLugsmC4skqlKr1+0IRahG4RVzIOBg/3Amd7Eqf5jbEg/fO
dyH2LqkZNJLqz1ftGg9Kx6erYrR7VW3JsTFwsLbgvkIR+0oPJKrutVudD0CW49uD
3+KOhiiOIm80nw3fY0GSA+oCZn8mD2iG6otWif4Q3QOS5mvcdqzTvvXdL02IScgn
YyidLZ00DWh4bpjnJ9INq6HQZOAi6aTpZ8ynFWgbM128VETM452NlSC1VzVqT4n6
lHgQiSBMJ/JXhaw3q9s0FjbMHpOdgD+830/btxrHGr0bffNiMmJydjTucvoMeu9l
ujSHqQxcqtJYa5Vy1uxt23noOou2xLUUWbkeFxqPNMTYsgrbXJDNka3p0jGpvzoc
4m/ll93ppJpSh7EYtPhhcbFhVF9ptpaMrzX7oDe+G7YrTbQed7al6qn8sjHxGHDR
WfhY+Oa87fTdeX3jpO1OJVVPVWtlpmpbs/Jg4jbvtrld+bxLSVfdVgfWNNoguoG+
pK5TrNpMeLH4tODUFz067bDz1L35InN1eG25e8vSex4wEngQjBsbCbPDe+RJxryS
z3JQd32non/6LO+0rdvYW9v754XITey0cKBw4XBftOMix8IySwlLAnNfZNxQ7Z7t
sPXH9oOAO2L5iQxDfuszCCse283u8DPOVRYU54prmGfZCclH9mPTjFqYWu7S+lJo
UwGzqbuE+9aJz3wm1hQWFU/6l8d9xGNqWv2Ysfh07NSPjHS2bGevW/6hwJvwUJRg
dmUH7raG/bnMqpqqzXHf5Gqtm1a70rXOt3fF5HLjKjZNDs9Mz86LoI/IJez2rCTt
cy/Tk8Yry84Tm/qPpL3KqK5vnkevmm80m49tngdRX5kYwOGgr5fUXe5fWutcJ56b
H7NgpbBaPBNurB8mH/rne3kkENLkWWU8lR+Lz8tGpZ335znLOtP1IcbRQS0CNF+J
L9XS/d+mS6cphBqEToUrhacjXiI23GrvB6/HI5Ln9wK7yT6bnhJny7O9nN86jfVG
B67NZ89SecQ2S7rYXpceLY8MjvfnnU2viorDNsu7eB59P3Lf9O+HY0/OpZ+lE7Mj
eZw9wN9vXYgtjQ63ngLu3v6nTfuXGfpXhZnuvz5w/4+5+t9s2r+XOf7LpqX/zw/S
/2PT/mtpQgqX7n+xaYXtdF3/b6O2UBlMJX4ZnftLpE/sl7zQrxH6nHO0VEADWD4F
PQQRVDxQP58W0kGIJSoYzB9UYXINavCk1Au7OVYyZy0y4t8KkctbatymwXNmHluf
uKcnvzA/nzyMPc64trwBeDVHEkXqbAF4o1i10RHGpbJSM/oKNoAheFFKgIRzxg4O
RH/NzsLbQMAdhX075rp5qoPUEbHrB7xgsj3vfiT14MOGnWL/pg7PE50MDHAIDVAZ
TRJ7CJxjAnhwCHlL9D2YvyLxBw4GgC05AAR5vnkuakrA9wGg0pBhqFi78BS89QxM
6vmV2VQ0qklJFMMv/0WT2a+78dEkvPbZaRDmxI6KFptnp4DH5JtW3+/tAh4pw9Bh
GIPRkD9DY+HegH3SRW+Lh/kxQW84VZWAMPTcQ87mC3vB4d74PdRJIQVd0AECpGpp
ucH19EP6B+7w83EfA1RGxiFFfH+B7qLn+vjfgugLaSAd2O/iBb2GFM+tqzBuIQPM
pdN8h0KPjT9Rbd0ZAWUg/aKuxoUZPWBGgQSOyZRBWUkchQ4P+gWxi+J3DseIcylA
F7MvnM+lm41AOhX10+0Drwphf/Qj0FNMuYsW+2ACDaBMtYsRuzKwSXZvXrAXM8Qf
jxpJTCAW81WcC2806Q5qKOBVijxcsEsAx7QXyBYoDG93UK6KkRRED5VCjUJkoIUX
wK6X8zkZbCAHjJYPG84XiG0MQCMGGANRTQdW/XsGUZAkhPG+LyXptE/L0x7raf4P
k0iQqH0/B1YGjCqMeHpAnCoc1eDHkUDoh5kuz1tP1/xXzNwugL1qX6goyF4ATBR+
RmCHcaLAmS7MX7A+cmiY4z4uHcjGIwTGcFTNjgOgjFEN99Fmo4EUz3aaBGcxyQRN
33jTB3NQo/DW9rPi2wjDMyDSUdD4XmMoW5nJMmRBMPftrFstJM5IpmOtP3Aap4Kb
op68PDqG9DzQhyhwLjOguZCih0hg1e5gVjOZ2l7lGQ/Ql1FHLAjjyhTpMtga7cJj
rybkTjTgr8ZOe79iGqVX0OcvafGsZfdc8Ywhvqw7fNpIl8mUyWBJWQARu7xzHeRe
cdvEW8GyOXAuQrGHwZDcBzDh3yn8uKPodAJUOVtBDvAxuElpvJvv5KeEHl/GYVDx
lsNZx5Ou/FCTgDHGKnizluFKsiHvYsHyqfw5BddtfCLQstvhqfakeN1Fy7F1nCo5
HQFpzxbTpscbR/I3RJkLN2VMaURRquliRA4XkqAgCbOFZLFBxgm0hfzk3JfwlgDM
YcuzHjIetuehlqiWrCuklqhZbwNUpDGJohAnf0LOAqbULPNnEKcdlGSZBE434yxL
GjyPsKWN2AywbJLmx0a/5GegT3/YYo/tMSFTMXpTyqfmkzhyPsl4DDOAGp5715t4
CJEoBcSej0hj9WfsDOTQWaBRQzED66f0DafuwMay9UfA984E5udCmQvh6s8Nu0Rk
2BqAsV+F6Oo77sj/EA/K15fg/QTHgy24TRvEeniq5qYncQklTzN5L+07vjaIMkEv
BddnH94lNx4JiE8EYArtATIJRhr6kelEV0E0AW4vQySk+J0eIZ1oeocnA2QuxQGf
rYZeEJB4lFhT5Es2oiyRxUOmEr10E6YAB/OBCFjUWWF4yB3AGScUpczky+LjOR4v
x02uspRPwfxl0+6qxHdBxoxWRy4zJoM9EB20FiwtkYY0wBkWAMiOSFBONog2ezSo
GRMwnuCQbZUhU1Xq+izoUsIEBmBaf98ZT6LYnyQeOWJE5D4PgMglew7o9brcDKZ7
CWaGgmX7W3cq3zUM3LddPvoU4A+4PgkxXQPxHnoZGPJe9Bp4i28cvdgyYOg9ujZQ
DX7z22A24BrfMrep37Pu/Uh04DpA+lGDZmnZi0JP9IlTiIyC2fQvU2iQAwR1alXo
k4IMdfQkghJ1snUTf7FbUDRBlvd3DabVzv/6do7uBHbW+1rLU9PM6lu+rdYCbxUo
3bthy4wdNbxXfwPlwa0VkbxTfj3pAq0VzbJbfCPuQrIZydMb/J2XFJE9gGyHtwUR
8CdSLH8BopwenSyfAjzTT+AKwIsB6Lx0VNzNGAW5eIM4GNrwXAOgUYKj+PDRxH0l
O5wVkSwi6xiufdyXLP5iVLlz0iwkGENiIv86Hzmp0rwFuSi5qV6IDXFX0UI5Rx2v
dZ3NuNLUhcCFxIWLBf8F+QXzheAFPPTIIun6/JeZPBMNNe7KjKZAJWkO0Xaps8JO
JRklWlkbpe9KIrJwFAnkCmTnyqy5Npo7sX01eWl5hXnFegn42rUito272IPIgxRh
nWH9YqdiS2LcYjdiqWLjCcwUTKSZ8m3F9xqqqisSKwJsQqoFHQqu9bd4B3djXGPW
CowKFopACnKKBuTlCo9lGXKt+bcZUsXqsx8nZPcer+RuWB9QH4AfTALxOyPbtM8R
RBFmQgR77HulZXllheTqjlFmtWaJp/CLFGXAZmFmSmaAZhqNg2aLZpNmzQtBC0yL
mQv5C/YLymVXyt05m8V88zVz3+e2zRNMz5dY829k4mcYl6Fm9k29ilqF7zKMqpEV
x9XC8xNLFUsfIpcMf5tp0Bemq6GrgauLq8ON7Y7fsSiwoqSapswy+9k12a0dIx1W
2oA2frRBty07ap9Izt0tIx4rHmMtnC24l08vwM5Nz2mXe0t8dQGa6pjD6df06AT3
svn7iqrFdxDfECtKsHOekAiszyzRLtnk7lj1w/TjEejnwxGEziLnMwgBD7EPfQ6l
DmFESKM+pZukPaeFSDCnZDC6TiwY1aWuTExO1E/wyQvMy8innlDPjxf1Gy0ZgRsV
GoFNXqZTpLanF6db01oz4DTQ1qboyurZ9uySiAuKO4vnHhCPO40rKy0piSqNV0ap
PqieqdpXhFfCqmzV5649r0w0l9a2sqWyr3jaLe1fxFev7jZRN/Gvma1ROLVklmeO
WLVvMLmHdQZ3/uoa+kzyDwNey+3Z8RGIzo/SD9Av3aMbLpanLCqQUOUo9BxzT4Kk
wPDauGQ3ZQ1kS2RvZP3YsTibsK9y6mJL5GZyOY0rlZTPlqxPJ05p0l+1RJFMRqMe
11zV+HRwtE9sY255bFdtKWy1tG8/qDrAvuia++gAG9RvG0aIVopmyarKeskK5vJ+
srseu129WjyyvKC63tz7mBmeCD6rHy9eSz5JP3xLtG7OLsVZrh66Mva29+7yrvwi
eDRwIm7P+nBgN29zeJ09qQbiBEb+lgFBCCQARAFEA2YKQgRiCe0GZ4GcAe+B60I7
QGSgO1IqI2bicrw6o45JABMtP4wGZQ+pjuTErEHESe1h/jwN3wQ/F5KE9hxRg3Zm
vB7eEIEkjB0OJJtR8iD7lF+ZfyTsjSMQGRpVGvXCtETWRNjEJcVgZbX+2ZJ8M7+n
PLwlWSMaQ9RAVEZcRLxE1CUGIaGWvMBlPzYhyEBDhEEYHpcuZ0IWStZIJlDvZ2SZ
sZh+GqeWtcq05ua0cw5pD3VoMM3GrexI7XwZyyimJrf62eC8TmoF7WyCbbzZ5Orf
AbBJvInYxeMN3K29TaBC4pJwGd9F/dsRI9H3FOqekVYhwoT7FtIUlmUYZHQ54ZH4
I7GR5UzASe6xFzMwoyHDqDaIVdyDeZm1mfYpbUBKjvok64rNe++dz7SlgRl2PD1z
OaH621fveczKCHfyA9IzsgJKh1ZMy7ZIrltuS03+SJOJ4Gz+7vZuNUocpCvkmpiE
eFLiPaUezWojqjqnte0awh2RobhbchDlRrOEqepSHY64auGZmLZH0r2qeKrsylxd
cHawh1dOhiw1VXfjuvnLFM0IzU9tDS06x8GkH1cUzz9QKFQTFROvlG6VtN7nTsYn
tb1UErtOb82WFzmWZJZDlh0qH9TbrTNf23YdYZenVbZafFtz9frDI+1ZtErSlBrt
4+eIV4ouJ+HT05tULFTrDzaUdpamTk8WwZrRrNRrLxadPh/PON6dGc8ZV1Vb7y6U
86qtriBWFlX0FeUb09vadZ6q3RGeGrwvPh01f78tDC+y3Qfd258GLznUj5SUm7ds
vk6BnwFXfD9fF17Lt0C85he2Z2rOcqZ6xwS2Y85n9qznuy7YMb1aLkLeYoOuKLvX
nBTuTAQJllQWWF0kXCrayVpP1OxV7NXDlcdnr7C6t9bMVtU8Nd6eTxHFSMakPFhV
PeyOE/YXek4i5mHXDps2uBjuJibr6YxpsiF5nD+Dt3GmGurXpLOe2Lbceu/47wSf
woepW7XMzm1OWF/zx6OFadq1rDp2nQpPyoYXk8w3l6U0ntq9XoW2I3Gs7Ky0TiPO
O5YSZxzflE4rL9fe1zyd664430q3i3faxXeIuna7Vj/KwIJgzT6ZXrTB2jXbo59A
Hh3eMZ/uNoI7gqW9Rt8ONK1Xqu+1y7FTOcvO7C/NL2Avu19dlvY2SeJI+oEPuku/
mi5KJ+evvJ6+OvVtDnWuGE7qYb0rPKq+PK7CTWlWg/KCsTsmXNney3YbP888rde3
Grol3d5MXHo5VtsnvaU+6w88n9/ccey4PZ5ZqDSvMf8XP+6feDkDAzPLP43/RFP/
04/7y2/7Dz/uf0aL/8TZ7f9/kfM/wXBHK4c/Dp64qYE9rjru3z7fX0mR/unL/+Qp
oOuga2Ft/A/zf4XC/0mcRkNHzfifUeB/fNJ/0/+JhuPSyDvqOfwFKtg5Gv594c+g
/r6oKPzzp4AkBZ+dqa6FpMLfJD8N7fXtTG0crO0g/qSO+iNT0Oq3y2lq9bsrkrr6
ctaWulb/bhEytbN3EDDRtcNloP/t1Or+C6D7fXNplE0NHEz+Gi8LK8SfDv77YGBg
+Kv8G/qN87vGxMT8fxWIP+c/VEx/0nb9i4YWl5mZ5a/C8te0/ob/CvTT/ovvn4P1
t5Q/V1l+t/zBpIX4A/1F9xv3b7q/0oP9j+O/pNP+u/6H79+S6enp/xrd7/NfMv6z
v3+P7Q/dP/h/6n/L+ovb7/Lf9OB/7iv475PyNyyla2n4v0yfha6x/V/z8AeH/y9F
pGJmZsKlYqBnwqX/kwSMjpaWWROCRvS3apnq81kZWxj+lkfDZ6//Z4MIGy3Tn4WH
vwEqejr6P0poI2JoamzigMtCx/xbmxwMLZVw2Zj+LF/o/lGAP4n9aFT+hcJEx/Y3
igju76mh4XMy/ksDcBkZ6f6ojsvf0F/9+KuHQqYWhvS49H9v5viPe/Cf2yX+WSb5
116Vv0E6XHpWJvo/XP6PlZGETnCdhMEPFm6G6btzT0737JUNg/jJWl9ehCheQtjm
sPVgcARwO207kBt+cPLgEL+mTTCXPcUkQh1WylK5SrBAJfPyJf4f02Fy4qU/6t68
jJyAf2l/dT99XBkdvnAz3HFOczJsuXfVq9a+p60M8KuF/GxIDTemJNpFPA/stzau
0oAfz1L/CDgmnlRld7Z9XG8MgTtYaw2vyo7ngt3x2E1xrTeeGMuKr2d9zAz2O2er
HKq12dz9sWw4DTxv42E9G5fa+gpHo9XgMuTYehTPs8fp9BAxWO/6DU+cWghZva3A
NZCVSPlq2HZ+7qDe/sKUC+9QO4zdMoU4SjLZPADoVKCLpHFfNo8koqTATwLvZxbJ
Efy3ow4t3fSrF6/5k5PHVW90flDbE8Rs5GTbbSbXkyQcZ4dJxdBeP/l8k2kKm0wv
GTcotLI4HOd3F39yMZfBVulsLoM4hbmka+Ho82SxUTpC4sQm4rs89wI9smpHHYWz
mF1LKelCTxtYsiAOpRDOIA/wOZgCYBH6VGpBmXJ87cgFvwbgE4A5eEIsvBFXSyhT
8DmlAn0RdjJpiOahvNNtPTIfc2AX7fZ9gi08wxhCBEEtX0ZkU/Y5o4JKEfbZqGRK
PrVIB4ATwrgok7jqhyzy+41lt2DWBioVBTIpYwPpYqaw+aZxjLrh2b36Yd1kg3To
EeYzzUyqSzZCd0rqaexMwUSqFtf0UbUVtl8UrjdxWg4eZHZjMAgchYRiTaLYcfx6
CG3kYoyjK0opJetuvHHgiSk/RykRJh3EGhZPSzAt9NAesWzjSN+SMkeWahAtmYUP
lnqT66RH/gwR4Q1kq7uuO27xHBXHft9RRD0WBhdL6BVGdDhqxx1pq7umG47jLUUB
dxFPUng17PcgOAi53lBbxz4n6IT2MasE9M6nRxQf4bXOCPadHvFyYFeCU6Uercy7
08a4gESU9n1MZGGuA+185tVXer22Xq/kdBSAGKAjVkl+xPAViJGbUJ1iXcS8Vzbe
5WOdzzep0LdZ2tA8Yovi0d3vc3G+cCEIoAcvBDQgiYIde/JexSMXUImsxciJ9NDv
k8tFdAbew8y9FaDEBTHCjPZENezSYZ3bmOuJONQkfyR18nmg3gics+w+w7hrYm4Z
dSMPs9hG5HxSPbqZE4qBpstK20SG5Yfpfzv98VjexG/MyPCrF0YHJH+EIuY0Zgj/
92AjCvTBVPjOKkoQWVaEN4GghVUpXsQws/GkUUOacMuIgoAA9TnFoVq+w9VV1laC
FxFdusMVc4qvO8LiZhFZrYGEGIdiLAHsqurNivFyik+oAfxuKJ0HvKGkc0LANcA6
r02GDM//GKIuqO11cqISOlGLmGtELTQPnag60L61Tn262Vmqo4/4JaBW10C5Wpfc
dF5MhWgyjthgyGzZmtpUkUvV2HAgthpXQKW7ipBLhW65IvymT6pWsvQZP48+Ka2+
mUdFM5tktBqXQyXYUBjTNGDCU+l/0KwFVNav28LaAH34c/h2jRod5FLf+AV11mPb
g9ulD3A/OJZ+V0IgX4WvyRa3L/qbpaHjyl0WMHkyVFdKZxCkdj9jh1AU/mhKzrKP
UPUOcfWOk9NvlZmPZY/tEhjDPZlpA7iqVd132v8h8qdVicAzuABx4wVGU9cA3G5z
ECtP/8fIWczQLcMjete358N6Dypp6HLRBz1T+5RVAgcLQkTdj5BlyKFzB1RMrIW2
N+0lnE9DoqFeISeUNYlbWnh1u+HJyq+pcKcZMDXEtzx/rnsvhFhfx4YgQhP4qA/R
etYrgT5QLS3JvvNvmBTq/fI2qZ1Mstgb4pbvZRuz3sHRwt0QzrQ+2kFPgl+oZzGm
5vewpK66zved1xezLBTsUKQr2cc5rOeRoUXufR/5NJ1EaVV8gwKVs+kvv5GKrkeO
+2pKUjIrW+rQjNO42PHomNzoLlkoPRQVzIe4nIXP+pSFzOsrX6/NnYTdcyFHKVWC
ppKCBgX24G37Rz/YjzkrNbyzu7R4lLaUtUtplo/O8l85PUWumFmhy3qNalAlQP35
jGOgJ3ihLqMm6KhGC7PUSQKyYb5LhlLq/MAMsmP2z6A109mXi7MTzf9VEipwXKJw
JEF/WqZyej/gAsYUmZ0mtytgMsYWFpHGSLjIw1YmkJ0ac5qMmTgX3Z7nRVLozJTD
OMjsIENf2uVv5DK7KjPG1uAFm7tQ+zgFx5NU0Vmf6/vcSXH27jjFF5UG3/8pvkQI
kR5ENO39ftRbwJOa3Ga9MPC6cOcKXSoGY3CLLlToxUzHXOkF+5GVhcltAfvBwcO4
cBULOnsVLL19MJejCw2dz36MNBs1cLw1C4PqD7yKhpviyoHA8LPuAnusiaLvwUR5
BNbEmDEOf7ZqxATpwmBs7cKC+jcrYzz6hptBkXqT+fNwzV+HlfgNZPxBzJvIt0km
d0nNgc2i0AjN4MGzhH5QkiYxAYLxtNBhxHlHHILxYRrxa9NMrZqcomOPQg07aFb6
XEsbQ25QltSoI19YGVyEqQWWwBhGUhjcHNwdZNwezHLyp1GJd++lSeV6tZkMGC6C
lES/pzyNLRrHeEKKacAYVnwyAjb8ApO06i361LTDTcfjlxS95XPBa+Z8w0q/GpgZ
cPCwMZS5CQZbVduWdJbjW6uxYvQbzTT6sLXSZDaTnMYTzvTpcLnwrfHD3u/K7xYM
sixBkKjo8i1TXAH0IL3P59rIVMme5SIZr3646jaHGN5N35fPdAH33EoLkkMDgTEE
nLg6fNuOS7qWYR2tb2m7isxIa/aKn+lgh8GPcxet5D8Go57h4jRsJe+YBng8PmvO
tRm4SdVsobPDLLL2Db8e/In75VcjdDWasRPJ01nJFVm8zD6kOrELJfvRZZhz2ics
sDdjTyaQH3/uAGzKxE0x7Rs2dkyYTDC9Z7fgvgboRUxhk6K/rZYg51KI2Psn/Fat
gR4IYslBWol0tW6UNiQUhElol16jtILJDee9KzydOCo8l4vDy4bdNMwEjPAfrfkm
qxmEo4eXeCddmnGwSSMDKpUifo1k7qIAZCWc4kB2fj2fox6+90Q8RUfGXfsP7yNd
oPlnI0T8TfHJxx63CGy8WoUktoswdcENiFVA0ATRMYr7RwZcA6sKCetSxNvlOe9H
jDGmwYa3rCCHe/twq1pSVsTuocmvDNqxiwaV99RVauIVBT5QxHsjCHYknZT20KlC
UWPNcV779HZMqmLq9A+p7fRPBln40vFcc9b0mgMSfgbEXcH0W+TeY++p9z0/nuLA
RmXdom1RZq8TkBs8EihJYEUj6ScnJt9DsPfjzWfBUiOIg01IxHcv60dRFqSVRQVs
k0kYSif4GiDiheijOX8+znE7EI4rFxkKGcPA02TZYl2+4poStd9c4FbHwJYKsqW6
ktvHgYiwtYJczUt5iXMUOiynOWANSfaSJsahL1DidRNaxxAwSnkPJpEiF8rNJmDQ
X8GznEgS5zdP745Nn3T/mnyuStJKFjYIgsMYOrDiXt1f3q9mFKE4VmEPTKwjOqcz
ZaPbDu28yRQ81O/A6dn4AmJcnaQ8r7kvePfzEEpO5k6q1RVC2Ne9JX350bgrqd+Q
usm/VZxdl2vB7p7iif+h4SX12ekFuvkqVpeyLqqF+5UntZodVaw84+rwQ1P6qgh2
TuD++0cctFH8L/7HTEZpNeJOfNhe57x1yq2yCvnLGc/UKmkciS/qj2oJQyMsNFgP
Ff/NLXHs/vQLvOBRsGdsomyZwLRS6C3UyeL4k8jnTYmrAumZi3u21ahizNzsmWrc
uE/RaVoRtSJ9PFIejW9h9QcztN5T2LrBN1x9XbpfSR5yvgkJryKNcv4NIJ1qNJa9
zsn3ymykOEkMqEdiB9yG5XWarnyuimyl9cfWvhHeR+fxmoaa3qLx90H3nidLDu6H
1QP+bAH3PuBK4ZvTPc6Ah2/cOuswt9SNOud+DREwecm6BkXz3xzQOmEIXDE8Q7ip
Xj8h23Dy74VfsV4tDHVnj7IqYDH6hnbdidInk/jQ2oMb659WouO06MWdRgkSRQkK
hUybGvjbtNqkxUSvRHDEs0WKC+ufjQziMRMh9wMyEoTH5g/M94f3afZpEkzH1saM
2eOtaq0yqwSenE2Y/O/37vceIl8nXzden6Ake6aWR6hv6Wmv14Ox45dE+gs196mV
iMB0+t6RnzkzJ+KEGHTI16RYatJNOCgUquahDYBPUO3kpHQqtI3VV0yZZdAlhWdD
DQDPMjtzp6h4YEuUvCIzYp72NrzCObSL62fSV5zZIU0DoxSAsU6W5WjYyDoluROi
5DrfWV9EmGVxuHqzEocAIbViwcgeCLXdAt751YSs8dt/2fBLGEOl+wzrH99tQ8ab
EH3wjfFCYwNTnpJ4ilkRQa5kj4DP3IDa8WQSTRM5x5K3hXnwZQEqJpArn405YL8S
p9NYG1CvSqW8Y25WBSHLidrGr5nk38dccjwCtgZhJknu08yFH3/oPkKaNnjIpfIe
+QJZ4Z+N1E2g23XK0XxlTREhZPKH7etvW5UXiLHhDC9uk8/3zDv5tz35wUIlCeUP
wE60QrnQoWHu4nngAGTH+PLd8e0l+4d/JDWcEdfC0CvXytpguZhtSknjyjNMx4Ax
2I8uprqLwF77P6Qqtuw53aKtSDTNN55gjMqlxOH4NNHIC9X0j4VIwDbFevYQ/3aq
2LtRL/BPSbT33iAnJnANcVZIv2IlCB1TJVN5ANrFe3RxCJX5dLmimt+RpVtUTgkV
T+gsjI1+W7NX7gkR05zpoXKIqcmqP4fiPvZNO/mNjuNT9pA+uDafhOjTJUcqYoyK
j/QxmfWRGCOWmLZ5ms0FSKTRKxah20qctn3SPj9eFZQVHy8VZ+uFXesqGgpYZRVQ
aUaiBQlcd2Rot59cuayS53NXLZXCVwwYjx3DKOnExoKHhRkH5UKLEjJCtD1sYb2w
s3390FCQGAv1SNFv5plLUbutQMu85uQExtm+ZuXGmxamGgvMKpIWHkmjoaOH5YKD
BvWxHE6f3XqcYcJZBuRIQDjVetRBLL5lZEdD6vV/3AUNyjWQMXMy6R10RPanBz2Q
FnNMFuXe5NZLco2NSsWj5aDJjKFot8W/gsoC0m5dA3Kg0anchJX+/l+9VsCNErfF
KDV5jlAttd07C4aFPDhiuSeVns1l2FMu/L6cEJcHjkaOHT8HLXkyqK93l7tXMIJV
m3mQicHiWLJfVlRgqOSxFGH6QGYKeknHeSCy29ov14UR9TadvXs4M7qkrYIRxwzz
NB19M4TBUhVd2BRZ3b29KsPdLSAAfOlrrjobUhRJcH0smVIqq4EiXdsI/UDWhhwd
oKdKuEn+5qVa2VxiykdpGAEbOr3WkgMuj7iego9YNW0NDdrIlapPyMrZZCvnycmj
iBLGMoGKvHlCjEGisYU8o+ebvXRPulXKXgfcPm80DYh8FthjAeXWJMWbxxYsJMnK
UpfwROcFztirYGEExVUavZf5emfh5F1na+QtAcANjaRcaKQrdFgcIZDOXAbswqYV
W5SAz4S99iwNBBWS/XxYTMRgR9SG/5AdoGzHyRZsRsaejyFFFF9aRx+F/5qbIn9v
G8N6NZ/vYQgWPpxcVpPdOss7pGthzAhV0nN9dHQH3pUvQKC8Q7hI38Xtjk2gHKgW
qgS4kcZ0kzZ1iT5toDU/p2l/eVvEStuauVY/EE9POPWxolht/twBSHb6oV1mbHwm
LBkR7WeGidFVSxbcmE/8sU+pPg2GtBfUhplgB12ZzA9liKmHJ7pgxLR/SSyTfEZF
1vrdm913oZ79HlSnkDS3Fp6s8WTXYlNnbHp6duLrIi9qQtQrkTWjm/IJvRRwVEO4
fkMK+n30RbrNeIU0Mg0kqT9nxXrd5FUUS4ZqbVzcDkyHE+rj/dcMUirUGGUfjkTU
JydTgBx6EBRTPK9gXgteAseHaL/MZR6oB6vTIykOYFar7V6Ii8XAUFEkAzs9lfKg
vpnHHvYjubvj3tzOtpPqwMnIeSdBAnptKSABczQMgCstvYFxhhVqt3w+BrFU5RYw
irBFf8GrktDKTBEetIfarxnRh1ZdeMQ+WRz7kB+IOlDJN+eudeTJoHse1esSxARY
gmWCaX5IP3cN82ONcPmMB17CDcii5BPJUqkNIVqlXf0nYnmI1myjgduORoFZvX8q
CxjlXdL1RO+xQj90slZ0IzqJM7QimWJVDNqyRvGiB5prssLkWsdAizTvcp/ZTs3T
ev3kWc7zxFr9sfuu1MO3Hs3hchsrxgukAAfUWxYb5bDLKVQ1krhN+KRbA1+Hg4bO
jQPB1WBLQNdLXtsTVwvfXjJks7vHa4eA0gDweROS0X7+PAxW6WueGRCQ43rIN9fv
PEbxuYfofyDHu1sQg8SXTlKgspDc00RKIPoLEKRNQ9qEsFMHVmG3IuyaiezzZpsD
7XVgbZ/iFfSMQJP8yR/UVaZZoBp1CP0II5tlUJInBVbNSOVR3X1Vq54nR6msHdPb
3rTqbaMwK7yTw3PtnQWE+Fu5H07wJxw2BnfCk+o+y+yRnvP+GgR3aDUpphpjroun
qPpJ/XXQji0EDhz4Ht8t1ksUvsF1Rmw9XeldRVEMAyGx8y2dViL2dFqCc62RY6wR
eZM+W18pS4kZWKUZgbolKCZTsFf5hRh+qZxEXAEKVrTVLcnifKRmsXRJsXRM22rb
6manCYEkrbBjd9dHmYObBxd5ofDVx8Vx6duyhraHLKdo/MnN2wnswuNFsKZxFKNF
h/UWxYkJ+2P80fQSJVHFT0OheLHQ+RF3nVVyWcy1Wi2HQmjMPE3FFQMAnoa1CyDW
TatGiG2MSSv62lEn9YUhCxp2e8/9pCfv+/kfJFGnuyBdilrH3ORnagLxo37hYdYq
9d6nx/0nN/eoH2efXE+WGa9vDJo4Xumf3Ja8NGDzME0+VEMuSea+hRalA0LzsxGz
rLp8hmToIPuFzq/x+gt7kadHBXr3oZudI/Srx6fxV2gTYqbDVZoeFU/46rDlyviC
admLCIjlmTD2DkwT6K4Yp82j0Ty4Q03we2HqCg+lt+dcDsdwIukSUx54HAlSE/LY
mR3xtkY5qX7wqrbCFUrZtQR3haiIMCaA3KRCYLXXsvha4d9aA5NjIaBG8AyCbbw/
A2akNr465snWRVnQnF8x8yl8rBt9VqBG+BS0+BXCA486ztepprfqNVEgS3QllCnC
U73BDfvC93/W9We6J1aoTzOnsPzaaiAT6lyZDmqnvtNAR0VP2087TEVOgVMr0TbJ
OlHbV0U1gdCcrlqsZNzS0a525/XOfi36EnjsuvS8E37cbkWxZjZ7uTnVEhKLKItF
a/6JNQkioVGfywiamBJLFctyCeefBtLFTC1+m3tQLYWR3Ns6k+1NKifgL+74WFl2
75bJC6HZkcO6I9epmOiJZYavlbMsqfV82ZRYSRFE6fJ081TV7T5tX67E9bQ+WU5t
aXAll6p1v3vf5HDY78D+sSoO2yGBI7n1tSGqcg7ZldkdNf0mK7GNNpEZej6jF2fk
qECToFw/ec7n/54nEfmzmHa0RAYy3zr155Xke+b3yB21lp5vS8DPavYh4NDh4I2h
4IOk5oDcmhv2+IckJrKM5Z1qJ9ihWhCRveO9CT6uNJWF5qLIislEfCNsV0hCRU4O
ylSl5XeLMsLQODhzKRPRHA7sntldOeZORZ7X7fGXXwV6gR57OYqz2hEe5uzezWoq
0m4d6gFdsf1E+QKNr5rUGwbmwocK7f14PtZM+WVAYS2J34VlcazhQq9XRX4FpX2H
Q3IFWytWTRk96g+r869VWdipKHW5gpuGjQ1D7Kh35OT5Hk+cQAD8yRs+PzoAzJS/
AUj6lqGftnKiF09gpTV0tRGmbi9Hl/776dgy0UP6Wptnjbw+uikODTb1BCMHdnxL
AG7zfGWBsg56SFZBp4y3gKSqt2BhtbbZuFy/eqd8Vj02mLHrea8LD6zhTSgWUtig
2YmbA36BZkWnU+8NEWU6drAO9L+0YTX5DkY0BtVbYxBZgnVe2lQLE3ZA8EX9CfoT
KjiTPrx05YlaKH2PfWN4iRe5rKHbyPa8zP/MBFx90qAp+YderMndFGVdNlAdifmi
fAaf8+JS5rEZ56XNbapg0+YSg2m7KFcI4kQ9LqAU4IcogaXG5ozM/qj0fX/E08Va
MXpJ9TzK04HDji0w4jXJ2fSjflceCc6r1Zs/y+bt94291x3nq6yu5xXl7BRk15PC
3kYGDmvu55WMQB53g/yzazDtboWv989i5oljaInUuBeNRyD5uAY8FttDH+09lXNY
xDFZJtNecKrI9AqncC49+kQ3fF02OXQlsUrb8kEcH5UQ34eaUTpPv2l866ySbagL
mW9fCMaSmplu/FyAFmw3ba9t9UJcKRX74CN5iaRK1Y4tjpmK2Jct67X0hJLX1HIo
Lcau1bVaV1rGG8ddXPcNiwUDhF2nBszqFcyq0jcaNZ/Fq4wdPdyoD4UDYm8N6pTY
K93JXIJAFllKEVrkx0WLK5xcTYRDel5Ro7XInvb810UgROBMvTN78jR3aQNJ2J8w
q91M19Qb4m/9s2ulqb+folsYN2krmHiSAUq7LEdysp9Ah/DzIcnygx5GxYgFEMig
ZoXj6BofHRnGoaHzTxxgTtN42T87UdhCUQiLGoSvNFvchhFZFDUPndLSOZaoUrpH
N7K+Hmiq3M13MlSbLUS9Xz6r6e+VvvzP5Jsr3NY/UNsvi1Kb153ULZYx7NWNJb0L
jPcT29nnv94xKZHV4ivI3Xu3KhhzHxyX1A9Vses4jV3n8zSINY0+WinZfPcG8uLv
w0YpT0K/DXwmEbYTiSZVBKhW1GmtBgs6AiskW6aFjtCnxTRL2IGl39XlpTR0mDSW
piMCbfuFSoJeV8bIFMGsStefNvq5NHYRdUd7hWfaOtCrbywGlFIOEWbgIC4DsHal
TwOtGZ7lpA+IeMdLMEMIuYTVJ6s92Cte8z0oXJyo/X6q99PSHrji6UWGrJr1WwbT
/JjukpWMoV3W3dNay4TIj2UJRl1dG9+RoVOgGmbXkSc19E3RlPVnEZiS/GijuMxc
/A2AF2q5G8ZkD0I5CMEMnxw3hrA/Vs6qm4vfZk6kxduntV4dXm3hHjo1IX1dNB6P
KKZ9hqVG5WCW8G+8lLi/M1owCHJm1cTbS9VrJhHolkcidOLc8puAAMEpDB1wFyNQ
f/n81ATjQ8ugFcv0e1oV5CZ38dwc6njTmG7Tqu+wfiE1oG17b6rLMTgvvKe/+oYT
z4tVNr5v26ZhvXJulT5uWa/Oh58W7vyz3tIfyKjeHDvtbGHcKbVrfBRMQzL85pKt
qFx8YfHUSFGJj9Dr90/svSw7t14V/8Y6lO1pnjukvRVFZLF7semsGx4yqZ+GMOlu
f+4735BrlsuskLCkIMGvvpuHoCzRb/UiIHuInNHU5gMWGiLMOT+Uu0i0gaYJsJux
03j1bimywFA25j7nisZZEjmdUd5yzg5qmzc2RKEpLjkf0qlX86w69rYRYRujKu/q
urtTtNioPF+drdc33CLMLfPp7LGvOzjlhIYPW7QWpPJt1MUZFRBmKxbMAkWgyL7B
Ny8i5RaIDMIZMLEy7cq39jyBZx313wNMmdoEb3IUfLa5E2NIl4BhvEg8qqDm9N+n
GavoqFiU2ctZ5DKK84zX9LBRNPXZSLpU6mo+e/a7awVzD5HlsIojto3a9l67yHaV
zNyF7apwJk1TYHYk71VAfUDNOhffhYLMMzg9ob26ek+KOv1gKtfDz20vn5m7QSbR
PlTLaytcH1jRCFgy2WTfcthC2DLLPveXK0s/v7sNfmVX0VWnLy/wRZC2GSVy0VKS
H7drCxOqqrMlGxwNtm8HLQtGnlZkyMyCJCVBkbkB2pV525kQ3zhiy5Vinz+k6TbY
SeiNr9bzf5q2vGp7HLH0lsTxvn+k0X5tKd/61T5E6X0aimHtopVloj5j7lDNt/Xp
aiT/qt295bJr1LKqPHvk1fixWI/Dwr01c/MLmMNJB8DIZ8u1Vs+YSJxpjY8i8WYY
qg6+I0Jel0bIMH9wlVI0AnZUBS+PCLkBIy3Sm0Cf7mk+VSG4H6ENfUwfIEJE5wb1
QWGvbnW2WCpCVtreUmIQwOZEcw+O8/tVt4QKEjv+yf1Nl5RxN9pcleQJYv7r6pNI
8/ue08twMvNGulPRtIPHPcJHWtfN9+YvYiBg4B5eHIslrQgD25oNfv7YrAxhflj9
ePdHh0NhBzHRAdNIVCqNHv4Xnm/M4LimR04owgIAqoOhwHlzl8EVE+iGQNuVAPsz
yuT3Ki1ZB/DO99/vH/ZnWMwDNXTCfHCIpBd4sUZVCWnCo77v+TuDAFyN2Oqm2vAm
HGRNL2pzPlYo9WDcDtvt78Lus3nP310tS9K7IP94p11D1EW0hThdHhYX70x2oRH1
sHopS9Y7DxyMST8mdw3UTXVtPUA/g+7iGBFqE9UyVtHvmqybciu+who+ozYGJC1k
woS8FaBU6oXl0ot5Hm4QMZ3gx/fS42Npeig4ckcw5dYpGIJhVpaPn3SiAo3EWWrW
bGRwB+t0dy7sZiOSBX+oDJzMshLkPpzlnKgvfGKLP0QywVEBhsYrxmU1R6d4HrfN
TcxHlWKaOU+KNYSGZow9lp882QOS9MkZOHh0OoNmP+Gfy4VMon595z1ahkSp7mbw
fPWHnSu+6jLb6HM1t85mcO73EW/6bct9FKor8VAEiuGo1Fz0568drmuredn0f0Ll
NtjfVR8XuDZvsHsevq5NGQlZo71JjFNNW181GbJJCfX88I5tRNdiFsYDCsOEAyge
JLQXxQ3g8IlXA8+W7RaQKBVQyYbpzuc0pQ61CfeukKxbWTfALOSPbCirISdNZtQp
C0u58R8dEstR2QsVo6NNcY0KIT/Kw/lKI8ikLaE5HnBdKU0E3zmBU3n/ulnI5j7j
wQ4kyfSOUeLCdUlVDtfe6eTkFlbb18TMwOjGc5E3kL+OGhHYPPJ789d254nOjGql
vuU+9BylgCbNLNQf1Lgc8pX4fE+hVkJAM0+fCrRI6cb2dNZIImq+k8KlrQhK6Y3F
4vlRrj7Glm11ZLFqC5OMmebP1rTPaq2vtLZfMvByybayMukkSvCORhsX6McW8lBK
fbiOLAxk0PcKz5KKqIAKhe0rLq59W5VGd1Nk62m65RnunF34usyS3XIT1M1zsxt8
flGsrLH8ul6Wjl2MuIhR1WXxkJ2k9i6PLNefHSX3kHtffN3qEWv1NghY+rqzAYaz
ApIUzqIhxh0LpheJKAudZli/ABSvOisKWnSuLy9LWltaKTF/UbiXwx81z7n/7ZVf
wojPX4Ni4tj8Pln6h5aP2pSmaA4+6ysI9ycuC4oPIrcVuG+7HGxhVuHcmvE8gr55
03zwak3cZzlzVKN87wPVdYLg9le7ZHlPROCvsu0yuHZyVo4BZDWjX78UUAMqqi1T
IgOBQDslFvSC/VXENxiBemsEwo9Q9peFJGdX/fxULL28AjTQWlcdCq35ct0MoYy2
/FyqotdrQTWLlLhky5106c0W52l3fLqHsTqyG+Bx5r4nq+Nc2u7FA7KlzN8YSv1i
Lkre5sjzzoO3vurz/Mhua3rB+8rq6d78JCCSt668wjDACj5+5z/ymwUGJc7uMut5
r1THvsd+vT4zTstSoTucKxI8edtx0Au5wBUDvnfjqp1tbS+dhLnCQDq+WrPvgfXj
lbUTM98GGTMMtqrDv4VoTGZfpp3+VWAV01RiTV59xr4YX7aSw4hro5fBPp0h96X7
EvyAw5xvEVtZJ9m3m48/XtMGxd65CfTL5zsgK/3Oxfx53x78vPp6iR5Cygcsegtn
gaREU4ttIl0eaVCI1JxjTWEavO29tul1Rn3nApSQwVJGEmpqZTJxhABun6zqKr48
WmxommtGobz3Ar5lrQwkj/LFa79bk9pWnvFr9srWFwEcaAeTTwAPDxwRqgwf1mfb
6nZo256em1SFshtx/AzZ8tPPGO2pkqCeKtVqbE4TDhebzjguvSWhwokQ9TAd2yLN
JnHQDy1WEJFDsKlMjGO7quBb6Qyl2ZYEmtbbwp+1UjS1ZVu1r9Hax27PN7DHWziY
snBVco+frH6X0rD68iee7lWddzDUB1fAVl6BqXbfJecbg0dS4mPXeUjGCXbld+13
J4fWItpees0TCoeM7irHKo00a5dJX8LH8Tc582cPIhISE5PibLRA9pAD9YNQ38Ez
A9/UHWuaG8ip1xylpiAc2blv2YG7OXgnWqYmBSut5GT7EA6VVSQ6MgP3AoOb60DG
7/Dp+ILptKLZDiS4wa6bSF/glR7YAD4ppx5tcXgjR33nWS+MwErg0eFFUEnydZGN
edhowMx4CXNSV9MghKEJcX84UHGqKkZ5PD+2FWZFDpp6GS4Nxob0o5ZPxMFvv6no
va1N2h9WbXi4jlczF3oL0ajNf83JEli5Un7Aa3oY6h0vAMZfbiR4ia6s1Rg/Jk4r
/LiyTm2vL21m7N3JZHiNIyo0bjqh+kCJSrHh6mMgTY1/4VcFz4oV3txgiqca0YeT
0QhFuHoqZM4UoJMzzQT/bMKvDlxPag7kLOjA5bLcIGhU36rBxhu++4w9qmG7w3R1
lUutGpBFjhIUVituoXmSAJ+QRz7cOO7of4m5z7nIvXZ6RVq7fPaPrLYGUWxGT+BL
9TalKoXnrxUWjTQjUYBpxUcmQ4qNNOvzIhMdwGXwl9XGN8oBNTFvGw3iNSAWwmgz
qbNlPEocaUUBZ9ZPeuEVPMqSJ90ZL5UmGYaE6PXOCFRMrJPO3vYIcV2XqpIYuajW
SvC6qEc84eHu8IfxfJhu8Nj2LVP2flwvnkf27roclUY9+9hI1Z4t9/5Ce18Z3rys
vcgimdva6KT5WBSyaMtVIcG7VdNpiF0vJXIUG9D5VVHsxhVrEJU7kOMNkoXMoM9X
b/HenZdkhNxCpAUXkgha9oHUL4HZ/8xhzBO5/oN888NF6dtRG/AwxfM+Fi2M4Cq1
p8cjQ9IpevG5JxnXdmEV2/EDoIMntBtVrLPTjRb9pZ/lmXeszWCToqJxNJebYTRR
4Yp+B6n7RLhB9GcOK/+dTLn+GLJhML4oXU3fpAGGKHwrkNeFrQ15NmEYQ1Af1U+E
LK36HELvqL6ukyLaS4LRuDRiKFEExOengHev/m8K37wFzSFTDPX76w4aNdmMQKy/
b2Z3OyTu9ZRn3Gxj4fTQp2NdldTtbWx+Fzh0cAqBZqbgrOzh4EQCaHuoVOrDC4+f
9tFrFvm1OQAlVB+JGjFhsHSzmVZb5oPJqcNibahEJ5zt7N5Zb85FypbuCVvVYuuY
Wc2y4OhUJhzlYHeTGUABDMkmOtdZAL8Y/rQQqoHQSmknuA86Qkc1JewH3hDTMwaw
5pKVqE/cu6YDZTyISf3MF24XlOBTzm1kp7QmWKRCyG9ppEcrQ8wp954FtN1Mf6Ev
X3NYUkeWlmhwI/3bYovvpNoxErlV+CYjXVG4aKQNesjpjXEzKpQd1LAYsAJthUw/
QkF1RtndK6NGXauhlyx2gG/eWqnVxq9l2jnVtGlGyzAoo39hjjEuJGoDhiqkHvxL
ArYGrPDt/gmtSXz61FHKqHnFjWyiknQCoLItWQ/ApEaiRjoHHaS4V4cx1VeaGYO5
EE01vn5wNMN9xelZz62ZnI4S8nFJAjmfrEhVKb3UlUZrTmiyRBcLrlkIlZ7uTS6x
L5/r4CBlrqCBlFe2qXOSDo4VxUeBa1Hl7MoP5ADhh831+uiN0Mhy26qaCc9Rl8xc
QIamdzxcPSuvKgeNlDZe0gTa8/JW8NhtV0xRvhxyyCpCyCrXQNqLbvHkgOH/I+0e
g3T5ugXBl21XnbJt2zhl27btU/Yp27Zt27arnrKt/r/3ztt9J7pneqInVkTmyhUZ
OyN3ZEbu/PJbNjO2LzvXnzjanj0O21fX6saVlxR9unwKGc6zZL8I48aZXwd/4Qje
Ll1cbMad8BwggMVw4wuCbaJ3dwF7nJc1MPCZSnTorXuffHQy4L/UuTyPIt9vmr+P
jc4MCVIx9iVTnho+lmTL5bmXmjl5VsD7RamvjetbveEyC+ZHnMEr2MIpbJIGKZpN
lXGMKcmUggKbnmH1vThY/JFJoiVzNfkuBueqoIphYolJH03PnJKepjMbtgESAPPq
FwgPu7P7ZGDmGMUy7Ud2mLQbeRVpBbDdQV9gdDskCg9VKIRx6jn5USpgpJCrRVut
TPIlpmVU8bWGfUDrt3BWwDOZ9O2F7nQTMntwunUK/VIERa9xfgnHCVJLB6exfgQP
xKGvc4MEUjMT0sPBzDOLXQXY2pFiCgg0b4IzMsCeAD863IZl51R5Jwuc8Z4ZwFRS
cmKdXMdzkLa8xDRayqzheLKRVx7LwK5emQvL+Vd1hXkEInlK/8JsUm49dwvzyf9L
W9mweckSdnTq02lbu0maO0tgVM87zbTCtlIKfpHsdXh8bjLqsqqy6/KTtHecz+OD
yMyGFE9qPmTzSGqEpK0DcBaHJJyMAc5Ce0cIqA3hByK0vgF5RQ4H3slHbDma5/X+
M5svN6WQ4go2sI3CTVPwq5OtcF6TC36ln4x1qEma7C2ZmddYZuzMjzqajdafJdyS
OdEuz3e3hETPQv6G34Gz2/3D3mKHQKAg/6K346P1TKChFWD0Dqg8K/3xYe22XbUH
LOmX/CTzy1RalsVk+Kd8wxk/Y5G6YNZtRo5FqFX7tBjnZ8YoSbTXKtQ6TJrB0jr/
untrXNhIZxRMBa2JYjOuW1DWCu8tIMKCVfoE/1r56RXOuogSQD8IhF0eMlGT1yGH
CEOEeylyvPoL61iD7BQyhxnYMHD/gBfwViDF9Ng7qnHGV4i5vXhr+z79COF1+D2K
w3Dhq/3uZlo7zeX9cuB7VlODSdZh+dSkzacWyxUXNJIPZwQHA9Ck27VsUTTfvV0C
4A4eUCbR0jPAEa9GdSF5MJDr0cY6WY4umyiCQMSDZ+Gly29k9Vvhyrego6kPGv0U
0dW24fCrOgb/SOMq/pS2dIm24F+J8cV26XWCCcZfLdwW10ecWO4P7x+PXNisbq5m
sK/dtPKb39T5W34M1AhvDOO6tQ4auq/RiVMUdAbpJSKsdC0XvMaI1zJghRukN7F0
ft48xH+CMOX69W7bsYiitEgY4JqAIgJlYYDg9DFVB/Smy1FM/RnR2F8YSBEur+v7
+eEe1bT5sf+k5Hf4+FFYWqIFBov9YJoWtjg64YY2A1cG2gAOuZ5I5Wt/yZX3T+E5
cqLXH/aKGc9bt748BwpzBorEATATMdmk91r0C8aAfo5HmCwOsFkF/qKKdIndd+Ca
tzV47eJX1zkfD5BzDNQyEqL/cWy52+Ph6Hq6BiSMp5rKdXO/nU96H8W90/j6XPka
X/szb0uv8zxzrArc++kp7qdZL0xa3GyyP3FcdNbEV7zrCjjlhJOkQehf7xrIPhrh
V3uUsCrbpaiNOSk6EpST86p0iPpr7twC6gaQh1GLIb6auial7dzXD7Z0Tqsgw1PB
IzsCRTkUtuDzmE4YNzlh8xwxBA9pA0ZKm5G7FCPYFMdgig8Ketwujahx9JjY2Mn4
2y3iPQNd821jvVt+vB7gV35dcpSvorFjVieyZ9i32jXtltfQdTUD8C98nz9443X6
BOM+g1mSoHBQi1mFJC3nqNSf5Qx4oEhW8FfD7BDrFeJXN0iUdESj0BjA9qnoLszD
HxnFifWk1silNLxjJNtFCh3OVLLG/OoZlVQsGjOSfdZaiYI5SQY0JaJgYBUgFomX
SMJ5GsYz+8PkDOwj6lKDk1Qto2NFygBKHSHne0LSljX4n/Ew+DH4+lYyf5W0JjTb
pkfIQTmLNd+yfwcle1BkAIX4kVQAGbz2AQEfbWFr5ADrIz7meIYIAkbmRwOdb5mg
Np+75kOSd44cc7IPIonmsOwpL7WgVF6PnCijQT16KvWD+28nnBoGjPbPj3v07GeY
H9p89Wi7HWiwdjoGhppSqxf9nRcTTiliM9kZuy0+P9s5/H8eKH665dat/c/alw7Z
vs4gn+g4qngeAL/O/Hklf8r0fE+PRTLC4HN/vUxLPns7PSfoT2f8zOBs4rlXtxvZ
qC4PJAR2quk5t3kOq4PVLsM2GDK0FeDPA9RCxBj3GNeRtBDC3J21aS/8PTUxC6v+
8LRTbYtRESA4oE7TwmGJzAjcdu/FlL0WbUZzbU6/LlLuowC5s1763XZlgEjDUxdv
uHbdOdeImGn63+j5jCdv2k0lzyRylIhEPhWn+n1C3lwd/v0GB1Rn+uSlozx7te/c
lgg9O42chiCo0iGyRv9lYKtqEij0sVzVhnI2SC/VNXehyHMxeWIB4vqKhiaBPR1t
YsTcqGI6KWa64WSwvqd/atkbhaiKSIsYEB6rCCLPz9lnvUBBBhpFAxIwW2ZJVJh1
yFGdBTpaYlEuDKs0P71Sq8qJUSN6CRH+uwwR3CRNzJk3Eb8I8i6IPuH1iue0WNm4
YL7zYfs+Wlwb63NW8uJO4z17/cnp+zzeWfZEY3m5vgLaWeOVTKyDEh65W6Axfoz7
JSmdlBBcuJR+u/q3JxbHXP+HzKToEOVU0p+vfUvxpmurlt/Ao2/G6Ui3eMGA8Kxc
rYJuMMkwRTFHaoJ0Ej1Hc4J2UngWxjTkWDxO986BZiLiS9DNbO/ZF+/HIfo0SUcZ
dYE4AU5brJQDC0nYoB6rmr1z+082rFzc6umLcWBRC7x2l9GnhSP3q2LmeSB19PYX
bSj8EBrsVGQ/0t3rNn7criUTDgk+hWApqKIT0/K+mmrYogXTK18kHg1ccL505NEo
SNW8BSPhUtxbtpyHM7xQLkMZAvvCHak47RifJI4i4HWb6VoGGowbgMfTKFzBhIW1
Db5YQoMFuI/D5vdeOz09Um51HDRF3YnrLZRUKJSAZcv4QJ3d5Gln+fvm9Qs3cszK
kzwPloUT+6rOB7fORyubvCdtAD5XsZwYLQXaGWqf/OvNTPo6qim/aLqACgfRP0hD
ZydNvlJnYK3cicvwoW0vqmgLXurM+OzXLqcW1mWcroj+j58N79bhw+qC+o10r27V
S/uiPYj9+XXvi33Ign7HnzP7b0eJzkdYytWYTKNGiRxPlOjPhalUJw384LYdv6ow
NbsmnEmQFQPN8uYquNCKUn0LwXUy05iVkQbwlTdT2W52rdVk/iNfztesZeWFK8ag
PSETktIyc5DZ1EuESxouLE6de+/ZUbJQQ73IvAZlnBULl8Tsva1tOQB/FgzFw0MZ
w7l8Sqrq6hjbceoYZqo8EyvpKdYJhbrWConM8e6KPwXeV4WtihoNTKVv8pvdz+MC
WXEVq45hZaNti22zqc2E2ibCpruGJYpiMpTwl9aYKtCt0/0ae6ZGdsPZqxMphjlp
lbVA76Y/Q0HXo4F+aVPenHoYZib1YEK7Syh3kKDAH+MSSoKGt0w7oi/ZlQmapHZc
oWFH5EqIvSRGVKDPdGfJ7SPhO8Is8zdDQ8hO4UZ0a94VyhRA8lq8glVbzTg4avDL
Ryf4XGaq5QoUxi9rbuu1Fhwt0K/rJPa03Xn1I4YySt48nipjRd3s2DNBo7mDW62x
L+HCIMig1FvNOSIXhHaN6MWna/8dcR0If0MUcSMUnbK7rCiMFOP7xtm2Kv7YtA4b
rEQkvZhJOVrQc+dLgVaEQRpREwhNtSExdP1GUUGcH6P9CB7sp+EgwnPC9S58Wo63
A2jaiM28KedREhyp5sZn2rV6f5OHYV8MP85UNfjduvf3rqSfc5JWew+/LKtH9EvE
jxruNhOt44O3hxzJo21uzyFY69Eq7MMWzaAQsZJKb52luqney1jFjWhpbz33+6mN
qPfFOOkBq3FAZFRmDZb3fHMfwLXPwm7zwWML48qwQuMy5DeBaVvBkpiyIkbMgDIB
PooezjbKMrzDspd1/aW7Zt38nEV1K4dXLRw9I23DTKP+VTf3GvZX333+zWAfRY29
zy4Y/zQPxrQoKFPxgN7+dfHSOtsx8wenaey94Y7AMYFq1Hn9OLe4sCFS8ThqS/pX
iMSUCpt13Y/2lJMK2FI6eGwGcjj5llVp51VUIkhYcH5/PVofE5GMZ4Ra/+liF0gK
80p7gI8oxkHzb2qjqkRh0A1x5UfS5MImhE595DR4AWrMZaAZK0/c7jJBdGowQlcn
lXwQ1bkDSNbhAlr78+O4kj6KI7tvKJzw6MsXVCaIoUBMp6YNcAnQJIJAirEAatzA
W4quDx3gPyuNWbQiaVbJoBkIU1zo+bbDKGjZzpPrTaONV5Pues3G6Snf38lfsJpP
R53qPa+PbDT6Ks9uX84Pa9P2bKW90r0/lN03fUc8CN2+R08if90OmfV/U/TV/nGx
orcq3WjZkLsym9Ctld7fTc42bNwhSKkPWinkuG1djWpdFeEAh+PB5HK/IkPsfulQ
UEQuDNIYEkeO4lywyJ+/VVhV2BVdFdVPrBx/YfTW8Bp7T3pXmTOqg5CBXfOxDHSK
MS1vHn6PNk11bLVMHT4I2bxRJl+HKdlMXVPfJOMRRs1drbkh++yXBaxgcIbH9TPY
kLp1YlNruBMMArzyp/sgN9WQBj7QMxIVJUXHaGIWmVN6Xi91aE9IKU+OEupKb+ty
xJ9cNeAa78S9UO2LMC9Vd3lUfBlLHQ3VGoZ223hb+cSCS5/sOes/Ve6HnO6uGbuQ
g4vZ8Udz57SZ7OE1+IFsBwmIDmpmz8p8Too2sj13vw4GH3tT/F0/pP1jr6Gqcjr2
30rttB0wdS+83xinC0swqbQbD+/mBsRquz++K1sdpH3ATi4pKVGsDVwanpMixleI
rZtd01TPDq9Re7JkmWUd5OFmTRuT1kfSr0sczB/5jhFr4kBz2/md/U8/tPdYhDx3
LFixj464qccs1XcT0bW8vSDr+FcUbdpcgz8Sbo9LqFbaV2Zd9D38i0ptqJ8k2VlS
1IT7ICGBpX6b+aMjmtZhlp8jQ6rWT+0cWTgGsHLJmUAv7R8lgQ7iC0exaIbFGv8V
QaL9nf/7Htl97TX88FNbqBjIby70dt2xygEDv0/rWNFXnOGBCqcy9RE50OmP/EU9
RQBJURo7Ucqj8DsANP7cEVNB67BhnmJGEbOUwcNkf3mwYBT68kKQW958iyBjN+zB
iPHwMjjwBMnUNXam6LsRseZ7kA12p7P5rCeypWYtarXKx+sjZpWv57pe1jxn63dx
zCEky2YcSdpDdqvf03vYDe6RMzuMDisI94PBDLlVDyW09x6OrQpOTOJ0Y3HIBMqh
TSPwBN7uKZH4QRt7oIinYQ4mj4CCn0suwkR3NihI92BQdmFQ0OBh9poYUs6+Dm4W
co+ce/YpK8+V+h0JpFvlLMfMpKvD+K8We8VWIknZZBHDxJzLYTtSMBU350Y5BdAR
PG0NQDe9Qpt8UOPJ7MAn0F94LvDb5jQ0oOyM+rYq7hCFHgM0c1uxCCu/JQhnpl/F
ivbJWmWrMJMVneYwsEhp2Zcy+2JA5tBwgV+EjAz+bPzKmPdDI0eAmkNjlTVvKPhB
CcoXn3RyzAONzeYqNYsJ3iJtWg8n6Al1AFiEKZ6/nW8PVGThG7GTHIVue+vnJp9+
cW/htcAPcC+ow7O08sVGemYHv8kh3VfpVs85F/fwiwlPATqZTQeD1A/Zlz1bi/EN
r9dNR/5DDjCmoyGM9l7crWIlhuOvcj4FZAB6H0R632CKRNWsJryQdQQbOgBuDJgf
n6zfwjWnn1rz0hD1qa5ok+wwdVlGe3sp29GyoVZSHGuUz0DaB8n7pfZEgg47Vs2e
iDXPkRnaQu0vtCMsbL2oRjh4loMkF4FYE+Q+1PzxSVqcc00h9J4zskpwAoGYCrHn
AsGa/EuCjxOOd1W9U65z/n1+SGqmxMygUzCbX0F8ZlzzLc5Kdl+D342eSO3qVjgD
87krhIUkdZbZUH5jWJ08v2YLhHaEIMXkvtW18rAxC2FC30pejQcv70Kr64Wa+u1K
cqos7FNtFuPlreFZvuwkhlpc29ZbmaXoomrmzAywGJxUXGoPhNjtWhmZVuJ6Vdvk
tNj15NTgNrexHmHtVpZD6qj1lO92aoZEWyngYvphSiDj+6z+KToVEzESkbqnykP6
rcXJd/ezp9j1mGSK5D4sVW4iV4VbX4DF38xS2VP6LWxY/8T/10/N2v7DOS+ejbm3
1FoxZoJoTL/DqVNRiEsCCeMOz5qsVjEKwqbsIOwARuKqsqqKKfX9R9xr2fmij2wP
Rq5OLJF54mTIzj6qjaxF0p/qNzDtQ8Mco87hVc2WEe27ullcbVAHtc4kkm77kGyM
+D8W+8Afhh+K3iP0Eleuz/VILn+MLvcMoUREkwicDLXNRVI82+0a+P7S6sfPrms7
ydjhpTZyDM1/QoZdcPtlSEAGOYj+Xby7/GbjnEp922s7/KzS3zVSgNdfOUFdgzxh
Li0YCmFycnZLowmrabMM2hVXL+Hn9ny6ud7yH2RpFNh4nqwl8DkpUd3U79jvuHrq
vxNLbix5lt4WshbwC1iQRWzK0r0d3L/Q+zvht+q5l72q5x/j3AfPWGNN1Pwq1y2y
kTzSk8URzWbHZMdSEp09UjiSKM7HJB4jHUM3Ut1eYDwSPY82nEPxmQDqhnBWlFkv
mAcwSZTTL0LyrOySlRvPvmfSXKXKTcKON75Hzhp3UkM0TgT+LHvjPCZ0gzCmNq5H
bM/DWTIthxBcGQTZo1X7YBy5xxqUhLvl0tUvsyTWwD8iWkNUP+QC1eqhPRMGSwDD
rs/v7tb93twfNOd1OpgK20p1oGnwO8gW2K4OxwxVr22s1v+5vHd3zb2sV7+5rCfs
5K1B9/RZdqMts1WNpb7XMKFAp6qgHT4wEu9nKDHkyVZJMsVvSzTAx1fYVxPmyUdh
AvH+gmoiwWbT+YX+eTBadZCh7DFM+Zf2pg9fsp+zI1smPdrgpY2TA8Mk+nOxfi8I
eIYoNAgRWOCQoMfDz7pTg3e0s3b03BPkEa/U/rZ5/DIDUR8JGQXBsdV/QTyzelns
3vGt7a62Z9ZogiBpkemEZehA3J/SLKnIg7TqweFxVVkX96K0hETMRXq+hVgNbDa4
2gKWeNwkX7dPisEFLi1JuNPhoTwUJXBb3acDTwaAFX4XaII+QnreUEmtszgmpbNR
pvkppi3MSmqH+ac8o1tXcgvhdNcKwa/z761SSHBC+AJrq7Frokid6F/jpaHbEG4H
gc8FM9WucHyipItK2t/nt7CYKOLs2ZnwyAh9HE2GscHDUl1cfn4tmbm5C1ufI6J5
ZMgllNBoGK5zFxv3b01Zh8BpQIbSLngCmNuBCQ9mVHIdwdYQbmDmj3vPhZ4yhLzV
uPntnOCTrf3LSQ7auETnTV7CaN5pCeNsXEyT7o4Ocoi90MyIahGVYrgyGCAPq564
FwS1Pmb9Ex+FHL1Paw+2d5ZBKd9d3X4rptYQYxHeozK9FX43sdu6w5fzYouQWx8q
q19VTx0XI3wu7quQWWoBDAunfZgM3VLOVAkzwy2VeOelC5g1iQuWqQhNnkqV4AM6
tQuQSyTfxt/R+rHYW+ytq9hqAUR6leNWjWswXwpWdYswuFjkhtBh03ax6IxfPfO4
WcUZ4DSMmOEYOizo3GXYA2oakT8zcmXrSY248iQVCLT9VapP1TNpVN9TxnsO50t/
ln0rlb8T/VqWeqdz793fTQUK1nj1hDJL64kYpT1PpRQYC3L/Grx4Pcbp8IzQsnwX
ZfFNEOwPscgbOczEP2Llrm1SAWLM84ShHK6D2ubEYmGGlCLFrEVZHEcz03RqZwxZ
sWW8EouUUeeGRJbsnE7I2+Eau6KBQoZoT3kRMGXu3ilq3trO7hwryrtt9oenZyci
Ptzh9Lk77ktqzFquz4eDbjxLYedlouGCcrSjNZsSgHTbNkncwtvbzKMWoVYuepYy
uNCQ0OW6qQywyzvXGMVWDdIqM+0ZVSpBs0C7fD8HlxVnFHf2vy0nWA/BmufXAdl7
+lW07DNKmDyY3uZvtcX4hXL1ekT9w1YdAw2SGdVT7HQNaT6GmjdAkw6YocFZCNCs
c0GL5tOI3Yy8TuI0+hknR6HniQX+IHsPhED86EDcbOqGiq4Mohbnqr5wJxI3hXvI
XZ8oNc8gLegoUfC44eFlQjaAg6NoOULMc7tYK/Cf/cwkpkEcu/F1YJLuIJ2v4aKc
zAVUBb9f8hw5DJy9iamb5BoVi9GoyREjlUmV0cwgHKJL0dI2EP38+PkQ+pR9YXyu
H7UCBTu/ftxG5x8j+KovVptbqnV3IwmoqXusTd9rdcO+3WBjFC547HsfOvV7vzC4
m/j59GdG4bjrE4+pr+ijNkS6JfGKJ1zrVaLFjItTPPSKS5ntJXcW1lLSDAPsBQFK
u8X5EIPoKZY9lvngoSEpb+dGuwMK5pe6L6PfcUE34rGdcRKxw8xM9jpyFVLyBJ4B
kaoQrhXv6W/2npbLl3X9Cvt2+NmYdvhGsGj4TIrLRekZMnTkXOQljOQlqDQgucY3
mCMbpOQJDHgB2yduY3ftolJu6hwBDM2cBDaLMOcVRqozxMLfne6lm+UkbY4z5SRb
OKdZ3KXgHD195SQrx33EgROsSCHKYXptnPGmQw7nn6XSEq8udX+BnC6fAW0d6dQY
laIWnvWgmygz6xkXuTgOs13wEhg6zo8j5Zne3DmantuwszUWO+k5tV0Njp+vsumQ
OTK57YcNwLrmRaUIeD4fiPa9TxIz0qt/0PRHcbnHMjf6YDBVTXFSK4/zX8+auO5h
NM1dsKIhCpePGbUiTPLMmF6HTGjX/wDG/qRFdWgEklQaWZz7N+TBNkUSsIbV/W6w
Y6U1g411D7xEoWdMiDlB0sNmHuFq2MwlZsS3qcQgrrxbcsIPHGtHR6TGoMZQ3NWx
RyVSiJmkGsBqWKCwNt9LxcS1zsVi7b2OpIGEx2a+/e0uKsfbc3kAPIsRV2WttfOE
TxDC/SrlZoTmJcV/Jd7ep8vY51HuqLGf9GcdvDLaHduexmfkSfitMmEZAPvu2y2e
3HujLBx+ZmxFxvZWil2CXZpekl6qWaKJiYWBhZmGkYapgaGxiXo1/HwgauhoaLk7
UF4C8VA1VJWAfoeu8fqTfoY8yUf2krq7eUG16JxCEZU7cJP8w70fYixQ+YDmAqrh
N5OC5gZaAC+hNh/6zw5S9BfCEZGZpLO4VQlOZBQtOReWtIeJ82wXoXsMOtjE254E
qGtgfeBZIF7gIHA2HxI8LTQu/Nh83wkQbNef9jsghmBIwaDrUYNXEjC54dpdJmHV
CRE3ns2tnX9WxyqZhRkLOYv3GMf1XXUSiG+TeA8KOY1EUXPxXEwdnJ1Jg3zTilVU
mBCsqb0dCfp6RFUa+VKOeohRap/cIkDWAXvfTH6qgh5LoAOwSAHKvar6GqHS7iHW
sUmKgrmwExB/YzqRgAgggfSjdBVNhe7KfF5JM6h5aDR1TaXJKo92ooWJc9I/kMM0
3JLWTYBvERwIP6xB6oU7CV07ATl85DL0dqx5UZ/q7K+gziPq/YrC7SCjdSnZzpp9
1xOaBj6VPTDlnT4ydkKE6TpuQlvstYFUoeKuFCn9EpQubPVb8MfpNy4jBA459l4B
KCXoL+FDhggUuBXKruUJNX04sMjGEfyiyfhjxHZZJ5sHREoBtpuhSsrhKWi/ZDuK
cIkV2eKkH0n13SfNiIWraNvNpnGIqJxURulSR5w3haJQh1+3+6ywgnWaOx2w8VKI
4/BQ3Ax1K7+ef6nrrpYCzGsFON0cfho6KXYeJ1QkJhZ4/ZdBaluJXTYDP0qn/L9K
BgnmogZgU2fx3RS39FU8xzOYSGoZIsgZehxr/AeaoL8O9nlTy+usbisslVv1volL
FwemXqpkPJF4Xr6bwtICgu5E2S5BX5OBmgxYeLeuyKmRayO7HcmhoMdt1GGRQk1c
MTQtxO2x7HB3ivQjt+G069DBmb0y+Ytvlgj6bxodFjMrA4DaNJD6XozKoch0HjDJ
BKBkRMbj/syCco4Xww317ulwzp4zvHfbAK+EfFxnOedbQtkhivuDZKR5faJxtHkq
IJjfx1ZQP8naEZIlivHbqVO8O/hHFOauwdOplaTjdFU9V4gdt26vtFin0miiePpU
cls8o9qckFfoJ/U4K6/OiqdCvmFtw+i5Rf/YUeN1hoExsYuvhdOe3N8TliVqJS/q
ZrvMCwdNWufT12LvkEOGRqh4Rn3y17RBhKhdor7XzY6ns3chMzq8Qr2CfWDMwOVD
f2xliTt8i6ihPkMvQpyWes6F2TmNSPD4LnFAZALxsCGq/wmiCLKxdNBmRJ8CO84r
lpzKQcL9fPltNEIyYiwuKno0pYhgAg7ZMiTo8QClUw987+I2PkTZZEDCflDgIrNH
MUIxNBzxU34t/OfWsbZy+jeCkKiQZrPmlVpPQg0LJURZVwOZaBUE5DcHxIthcnUg
FATTkU/3cBruq4DPgP1a6qDSdoWAztuRxvKWnZsOn9+nLugmgWWvx90a//RlTk0L
j3ccroDjA4QaqEguikz8I5nZqGjvTHXBKxooE7aLijlx5HyeQgma06MydQKBMcUO
UR5EqpsOMlT3lkR+UZ+i8cHn9nkZ00BeOfstXD26fus+VChtrMUdxTTWeC052ZjD
c7FZ8GyAR/z+pcjVSULOMmnolB0VGdlIcHnoI5OujHhGiQGDUlD+DmfYjOED/EPM
arz1WfOl16DriLXsxZlXi1yHbm9/3fwrpWefR+uZ2H3wGfp9g1/pmey99WLYEWKJ
/VhpCctRUjlurfE9am15MKnMl4xxROi0TMaidjWQaoWzI9JrCOaAfnaefCkrT644
6o8mPqAbC1aPHI2Cn7ogiSpyGA5C484RxTjIhdKTUoraQwOMgKA6F7ofSUw8cdOC
td9xIi/tlhJy2OTPBLEwhotXIrIh+m/wZw50LFbZIMSI/bBk4U5WTtk6jsBQVuNo
y6a+z6cbriti3M7K+komgIBjFqRyoIb1jBgtp9WrWukDETS8wopTZdMf90i4zYZO
ESgkHkH/eL3HyUMxDc8fM/l3K655180tskS1BnhNhr8I8YkMoDxZTnov/CAUEEJr
Be+XC21jTDo3EbnvASZiLkg/84gS0adlfe/sa1jUhFpcR3ND7eNEip9bwfiFtqMW
GnQGGuFNQ4h0e+46eLfYUAKSKfNchK4IeEq7AkU9FC1oRwdyQ5t37gdDSCDgHZbp
OlZGqdw1DlshuzYBkmhWbD+a0ESPjUC8FBRsxqy9WvAkRqikvkreXFoadBe04qn0
JnCc6J97LTPRX4gQpb91ErQJ2IOnPOuSIx9NQ4uqMx7nERnhmuATxc9ZvywGKR8U
PiRHi2doLlGzYOtT/WsevLbh39FD+Tq6n7dn/M9nsKSnYlGUjOhakteistGvv4ty
H7QGuQdBF75SzM/cWrajj0UatFtXn3+9+W5DjjAcM1zpc8qf+bGGThPzLxI7qR6x
x2+KXU/l246ZNE7KHTAC4MW8vONjfsGxd5sUpxBX+XbVPh3qTMBc0hwC+a2vXS2k
T8UGU52lkcozyjrTOlU52bik4ZJjt42VkvAw/WAfKAfKIq0Tcjxx/oD8NPgTTdNF
zBF0G7GmwzncZqqIVrmZiBMdjEJnH6PYxo7bRXWfzP0y8gpbTFd5XJvKazXMiapi
53BjwtoTl8yAs9OZOQx0SvqTXeBValPHQ8teCchB9dkymLtAvip0Jh5YFpe5XqxI
Ztd8Y64yucqbtSpZ00DVNdKyHTBDZNdkOXjxSuFUMyahE2CphLFFwZeycc+bvS4o
1S0lQkPOQ8fyraif311ug/PPGsP5+uHDoJRwnXsS8v5BzBf0EgW5GwoK9MBJjpSr
sm8doWVqIcgMpUqgcy7KfmwYRfLykPn8A9Ii+Tgq/6wuP3QNJXIyJsf3YwiOdkRC
WvYbDBqbedTt3HhdieL3W8kw36d4Zz7Mwc6emoTWU/crnraU/0grxaHUqR399Ujt
Q8QFbrqxbUka7mEvK+lBtJNh882V28pfJ1KkVznMuC37PbDRadEjHRpUHkZOEeR6
SfpcKMmESDJu6m77G2dXp2Vn75bndouXWJePntPfP1AQD7eOo9qX5z+LK8sh7PFi
++2t5Nk/6VMyC5/ltjbTSVB0zxKHanidzdV/RJkwChusFZOsxNyqf9s6uAsRfHre
S90NQ4K/lOdV07n1N8vTR70TQ/3pKdNAGw6jj7LQ6mWR8nUyYPaXGsvKaj/dcu69
6Sye/OE/guQXOBy+Y4hDDjtnLLkHppPN+tKPEIkyHQ24dGY20xAis/DGEMfibV65
ZXGGMzY9mD2cD6OsWRi5CXiTsjhoCXzjpyTEkzLTLZ3FSiY6PQ5s0L9gb814BDmv
QJ8vUNOSqrSs1rVd3XikIRpu1unkUKqDcSPiNYBfA93f34O25XSZ4ELnr8xG1G2i
3zjNmryXPWZwpnZZ9aTpdfxe/H1CYc7fbrKvGL32m7l+DMA8YyBJ+nx1msoT3tf7
vi0CBkF4CGTWiIRuFGvLodEQBCpJHbIEISaOKQFhI6eaTLjd+5c1sYvKk2GcyXzs
3RG05TZLKucl6SnF/C632tvgW6ZhhgdCGvoXqsO7z7qWXvVG1clSRfV514RQ7lXX
NlgScI8xraJ28OKgB9nBNHEa0jiF1UxPpBD+TerLXdnbzi7oPKQUkekRmqYo8TxE
gBeJJbWSRSCPu0v4rQVeDloIhWzgKQsJ5QPLURqUgKlwHOjEWEVVFkgi5J0hL1ye
G3aSbt4CgSSv4AjGJesygg+YIvh+6K2ok9qkUi+XQBUAUA1Nh0jpLFGSa64kzcIw
egLBscSB+aF1ivBt2fEUMThyIGZ3NnEnEEnxuj+LKM4Du0n14RK/yxuof2aztEjY
9xA3RteyUGE5/HA3llg3uEJE0j/f1IrNE7OVnCFjUHMkW5XpHpVZlNUeduypt0Vm
ywa5zt+DqHuOzE4aK4m5pnmX9RgxjZLsw2WNxqKk1kXEb7oc8PbDZxiqzYWPB5ZG
scPskvCKI3VSQMvBGEsawFKg+PAtCNFK+WINonWuKX+vfR5NH1RkGp2fDwtW+moH
3Cen80hzuUx1hTMU5CK/W/lT478Eyt9RncNfigh9bzlC6J8QZELk0hdCmY1hFMql
oi569Yf6mlRfGApkwxP8nvWrXdRg1OPcuuin1pdTiCyG0VWJoAAQeY+nF4HDigDG
uZcLu4I6nsKZkUNIk0D1xSF8Gomsl6tVi9kKxyxsysISP/bbiLQ+BeSmGqcDpMyG
dBKv6m4MhItS2cJycA26P1DT1Vtad+14Ne4qa1L1imFbgNsnvLtThQyCIZv2i5VY
N8Rzrvkp9Y31rqq3sWlfJ7mW06qgRfRzsw5JqLe6ivK3V4F0iIoYUxMyTr6p7RzG
FPZqrCe6Gqw1I8+geL42ANmLSaDfbCrkL+iExa8T2zWE4Tl+i5QbNJg5gjXQfuF7
HlgaOqHb5GA8Pl1dAbtxm1fXPH8H6W8am2X+/v8FzPnv/ofMjCxcjP+duPyv3RP+
PxOXYioisuIS/2kk0gnb25j8r5zL/+w99n/kXP5LRfx/cS7/f8T/ZqR/O5f/c/zb
x/yXavkf+X/qlP/dwfy3jfmfWxZOrv84619O5f9NovyvfSX/dxLl/3qW/yeOEkab
jp2Zk5COhYP93xwlE5Mu4f8BRwnzXzhKJtb/4VES/j94lEzM/2qv8d9BSg6u/wFS
wvxPIOV/ds/8L1Px74Z1/xWk/L9amP4bpPznAv/c1P8WpGz2gvZQEVt5Lu9obS1q
deHuNj27dulAXYiA1oQWdUJNgBInFexjzSACLmCkB4OmjwYNL8BSKWjjYRmCx1Ns
PyMkBzFemsU2dxTMFvsyG/lk4YyN9TQ5UXZB6+httYNcevP5/nn7OX2zP10qP+5S
LZVTzdZW5fhStwOQsdgSRSQlp748xj+DwfTpaXmq+hMmz9ASMdN2tt0kTCpb7roR
bxen6rhdDZe7KJA3YFRfX2km/16Uus1YHpMs1kT36D+f/KiVKv7KDUjVb3E7VvHc
s5f8oL9pN6vwfQddCKTxor+RHU+thmA41+7s8aeG9y3ruZnYofJckUq6G6GuyCuH
UDKCm5L5KfLakPI6MCll1hIu+vnTK8pdJNYee7P1rrR366T9VSpeqzjI95n6roPs
qXnd+RDFIJfTkMgE20Auq4cGZJ6WzZl7snYWxdCzZrHqJNqfPsq7VV88T8wn9iFo
gWUIxAr2J7+4VBwuBcYUbWt/yWMLvRpLOlZafthczeqt2F3Vhov0qvhYJeKy+46M
2PsmfIF26CVWZeb3XcMZTtwv5WEI85DeeUgN7PBEW+oWIB8KCw4A+F98mKtidyGp
v6R8RHy49k+FB6MK8dXzVHyh9NRQcQEJhNAbAqE9vOIE8sdjc+fxyImarD/hoRMp
+MAToXMIGyAbkNwgC/NawZ3/DBG8Nkjpndb2WPeosHXdylEiJVAwTUjPJ8g+Mha3
cfOr3rql3X8oRTOfdaO4sxxvSCr5ZJEzvHCDB6gziHNo86B4kQ21JaZIk+by7y5w
sbtgPJ6FExTR4gKMkbDfqGSJNKW/yFZK/n4PJkPtbzHxy5xIN419HCOlWhfwkDEG
W5BZUH3oHNgeYS0xDFl50yGz2rU/zziEO4Sm86xoHL/pZcR7l2jfKLVRN5FaSzbW
kRioawTjTiXxZYfINctgCsTHkWpvIRF+R5p9XpGUuOTvPrfxVR7UNcky/0VV0iY8
ft5EkLbEOmStpsAjIZceNijUPBfk4DHAEHAxqWuAQj+L5KS2mvqrVYTrlH+pRJXa
0KddzBsjQM8nWi3540CacEggQHm1oOAe+Xv+83JpKYPPqF4tmiOjaJ1StXiTCajV
OgYxVtRMRcFYlLrACSkshoOkBZupkzVgDUjcFoiELSAeJ0AJNM2XdPtPgjahMrlt
Ef+ZFQ7YlbiOTGUVJxw1hohaV16Zkcz9b3ysET+kEpOxp5i0KmEW+a348ghP8amV
yNDBBS8toAOA00/4pnL9c55KlWuxyVAiHZCvo8zqYAIPG2vZOFnoUV0SqAjU4NFv
zzva3g2AhJaMiQDTN6yfClZE77g/TWgmgZDWrb7c3WrJa60yL9dMXAkGuL/IbcQI
7jc+tfbMj2Qn8uEnoX/6hGI/j49KNL9/Zpwi6Ku2ZC0IAWgtmD8/vs+ywISERF/e
R5BjlLRLSi9uXIqs2Od+eTiPN/WBgypr6Jv0p9iEEHovJAOQf3ycMv8r7B7+reOO
fO0fgclKS4zXb6pvgs+/aQefXH4BZgFxQ9XC4Gx2SDb6OgxrLI6/izcmP8NeWXwY
3gjfXXgPRPZRSeJBeq8Iz40/mXYIZp94cBZfRaoSfUHyibykHZxuww6bCxL6X/MD
/KMR74WGlSuDk5VM41Tw6RnodknABwIXBG0N5PPmZ+zDQNen6/3eEIKb0fbS+AjB
WcfsIyabrQ6pHqUeoxYxgkW0qn4Z5mKQBLvRkf+Os66H6InBCOA8XwPbgNsA6cgx
Cf4ltAuqC/nek7IYtwYxt3xL7iv4CDwPKZobCgAtQAznJ3xnDbZo/yeBn4cX5UDa
FnSxDrcj7AgEQBRoi0D5dgYCVpCuBJtA5xFEO0MtIAvwwt0IN9hEef5VtIYC/48Q
E6EU/I/AEQb+J+aRjgWTQBURRNtDKSELcMOdCCfYRLn+VbQOB0ICJgQRBGMVBfrP
FIcY6J80ILQO1BByACFYV2Qt8D/SGqJLwX9S63BoQvKANCAjYREZICbgITAkVBwj
kH8VX5cHF+ZH1IG4YMYUBWOt/hYG4IIfURJKsP3rEMTJpeJiAMloIBqUB+GSs+4Q
xw13zdFgNBBvte7wLy6km85ghWDZvwJHGPw/YhmJ+p+oCMUCMYIKJyIMZR1CQhIR
hANmKiIKDfinKCkCB8IENUSIFIRjhBQuRAgRiLWEFCT4T7GM6Ls2LFR/ljvGY/We
ziZjhGNRAmdX1N7y84O16u7CIm6kV0KbrSfeis2PTYw1Nn/FQ+Athva6tpmtYw8E
IyAlaOWPW9BzoB4QdtMa8tAOOJlncwLDJhwsXCf8BxwDlssHHCqE3SLD3M3KzWJv
3urVojzAM48pU5tVAGZVmCfQuAl7f5SwSxSJ3aIeQi/ErXLPvPKu8kD194jJ3qGR
W1Fat8LUM3pj9nDV/NCsYcPJGYjKpCHQSnkaSeOXfaAVSUjjfrqdwG38JkHc0qvE
ej5aZolo/CcUK9wG6AZMBbhqwG8hw78EKr+oIKqUx3Mr7pE8iCihYAKsxo8H+Ofj
DVVG2kKusD2Hhcnn5QyRHSAPQ44NCu8GwA1mh2HVX3/JXgKhR+oie2NEWTG89rT9
YEXmytWXHnwHSfIhv6gHug7DzoJ0Muq9ZvTOD6T81ceYi6XqwQKlX4g6+C5G0sZ6
kQeNGoElEe7Agg9R5IbnOTfeC7cG/FGRzm/zxyh6OPzmJrItEma6lZEvzvDiHhLT
wgkUJoirl0unOvuW+qH/kZh7uWGkLRndDFTEvpT0SKJTXfgM++0Pti/u38UkO3b4
xcg7rNqf+3QDvXvgj+Rafwv88/Xd+NmaGosT7/vrsUfMmvh6Fwfr2DtZ5gfDv723
9zHNv/tHxz/OP76XJvqz7Yf4hyiffFiDYte7bzcW5jQfc7/tJ4vRJTCy+tv6K7J3
Th+Tk/RSmkV0MW28OCwYvIx42Qv6UhtX/MLxJ2FDMSUf7VfsLwh4TJwMuEY4IpEe
otm/1g44eOKd81asvxajxQt3KH+1x0fPzB8Fo6CfgpXq8dADHI2MSK0deTAdwaAi
WEhKnaWmkzY8Ng/IV0pia4ta0IGfhg7mKKW122SWQzLSzi0KW2LJXcWbbJf+6hSt
iG+qiHyEZA9Gb+OL1Ey0xjGfA3BNpeKb6bRdp4SIbDvpvKOxHuw66TBI4i4qIOSD
jN3Eda0fWsG2tczcnR8rRx+eLGq85DcP5J7Gt9K0iIjHtzQyvb4O+sSyjbdG6Oim
jbeoNaqcZa4PW1LEiPWvrWOFLtPIQ9dtQrDQYSCYjFHBg7E+pRKRBrGKj4gDROgp
sY4WaNHmj4gtMWTlzITtXqsFpR8cgIBNBv55fZjtQ86smdOY+tgRJZAEqdEMsoUj
XUNBMowWmyI//cKTiAOgBv3kK8dmm0aWGmpFB5SJl81FK5pbipL4tdiIBdlmChaZ
Z4jHfEzHflo17JWTYmR2686OU3YUpN3LijGXqq/brJolthuIkbB2moTQwFSoFrqN
jq36vb2W4fN3zFyVy7gYeXUHv7TvJgs8vMo80/TszgC4fppntrHy6iWtwV4ZxiTw
T9kxuxYXKSy2riv+0tpPBQ1y82pBoR+tLThijkEWlYpNy5QbVgo4TS1aK+Geuztc
NkUla7jRlXskvHzwzm08PFjWTusfZlHQfOw0gPWkry6ZS+jfcSMqzmVSzQGiipbG
loWUA9yoYmommyWRvJlm4I255vIy6Ovx2chWBYugQiC7JWoMNspBUamukeUF1Iz9
rTHrXncWw/hWmovRAkUfbOf6u/4d4v1Skt+zpT+bOfC/2KtuJOqIOnLKZOn0tkpW
aIPJIUAzzu1iiW6qFj0Tio7hM2XoCscd0cTzwS4wpyM0ksQM//lxfjTZE3knAsUs
Df9G1rcb3hhc47CB2Oecqo09pBZC0+VLIBixhCY2XaaKPayQHPXth2liVIIt29tH
U2f+jYwNh5iCsIIQEvY7zOqJkq8OMv2b70AVh2GTRNHf5cvSmHCDIKg+P8XiJt9D
rmbl9m+4aGE9wKtk/aLpU11nUuKeZrAgbqNRr1JvTbuRURg5ZF6MaoRk+R0iHkWe
usDQ0Bw+WEeyWEkrBarH6++A6vxDUuH8YRKJhMNIwVH9YpJGIi/5BNgpwUDiIYTU
3BJqaSngpSoc3CLYV8juPctz3SUjbP0Newb1A4C2HXPoC7k9iKsSsAhAyRg1GRM9
U3s2uK84gnRh35ZCpMg11k6UL/Ch+EriD4PwH/jVmDIT9olyXoxY9EKZ4hMQ7cJS
vEirNaSzJNI7eKMMqI+6Lsitu0jILVSlsBXzfVqSjBnHTKQoT7NLhnS1T88p5gEQ
LlKok68ahCXJg/JmfOre60YqROPnl+b987BOOlNJpi6wd8R5FucSu3Hw/YY2O9Fd
wN2GtbDEpyumAVjh5FGcYU71b7jan8VS9Kb6EDQyJkbmLeK8B6g2vn0yrWdlZfuE
0RcxeaF/ofc6vgm/OW6HRIQeISYy7D9+4Uobh61FdcBsX5XWyPMn+UC4eyFnIERl
xbmpzcE/En9lfQv9HGUmZlrS04lP1tbpYBgga3y6b01y3MkuZLpgeG2C23LM2SlR
yc0uCnHDbX5SyM55T403rLfbgHcGfSVmvlH7iXopbDB8iZvdxxneIIUYFvp5RSPM
1QLYuAdcynqzmhtvGpov9Z5F2PtVv5F/ZNgnOMb0J0pd4odEDyaP3sblHU+e5z2b
4tkHW+LmoK5K9RftHWne9F3+rK/DtWTwDamw9/MfkOfMYt7y+yHKzcpLn0q7SzJM
LDsl+pR/ZnzGXpNvI4jEETk6yRupH5wNXYyfJtQaX2so+oNhcloDvKYiRwHgXqjN
vbL+RQJRb0Hv5vWmlzwWpnybM9dG8o3qaxeXIo8oPAif92+0O9Fqq/c0hqXVPpi9
sNUEyBx4bUWvJD88PyoLUm9KMU1yXpJKxYpnZY/q6/QSR41HZ/cgnulZQ2MqgJl5
uhW+/M1Kbyl3Hf1a/eKbxZ/pumWHwjv10kj5LyqhiGVoNqY/7dZDMhtQ0p/hDtBQ
2rhF+n0FvaEjqI/Q4v2jf6qQvFbr1VZGThph18SqUm1NORp51n0vhZ4ZvSH4BAna
gDskPEn0p7w9GHrjd6fsB3VH/L55f7h+8OhVyPPbtWGkFC07/qXf6lLqBvI/HlLf
iGs8I5xJnYU/ljz2PHJYohSepDwcwd+Lv/m9OXr2fnZc824fv/JVeQtx1Hjruiu5
K80+8fvG9sj86H6hvgv8egzFEencxxi0h/sxvTTmqsLKgGR8meXdimJLG809kvNk
yRR1o5fDY3/kjXTUiFa9018iJGOkV1NE2G5oU59Bc+gmrlyDem4MUpnWy5/2ojc0
ppRXyPoKlB9jeGg8a63K9DweLaZx6d0T2oC1Zx1DvAuqinh+8OpJ+hEkfsbfibwx
7NEXca+XXvfamCRfl3n2VZtkX7Rvk9aasit6PxrUMSNnj8OjsBBcnawE8Jh33FYj
q4VtviGiCCTQ3bveyhe6IIo/UnmlfqX1GHQcSdzaoXQpInZNVafdbEp6dNNXNU5r
xOl5/J18lLAQWDxE6FYT0N6RHD3Tfwy89pwqI/dYfEG1PiIY95daIZeuH6ibAEBX
dS67IKhNeaeRhcVjlEfVLSzuSTu8SV41waWa74atdpKUk/v/7SLytHWi+0JZY9CA
/vgDbygWDaIY512rXv97x4ynDmH2beX6i4AFtdIii98EH8MMXQMxsaPSJaiDwvXD
VWC+uyQXwXpXEtFI/Ae7kQueT0OqdjHsEZvFyKZLRVh1zh3C5aZo0kOGW8Y5Le69
zixqbzSzxKsBv9km5Mkv4MkHy/qQ83NI7BF1K9fxRDxOrcCX5NwyKDt10WsjCLkr
MIbQHL3LjekL76ulAbsNn5IInG0btJYNIftb0D+kOTFDj+wWdtqG6vw9mj5P1SI/
dGOdUXwPaLm/kV269083bFp2hga/N1qbXZUCDX3vhYu/YdZvlFMK81u2BcMu44Qx
goFNmswZs4u8EPgvTjFNG2BVCgyhMI500spLeNmoD0/7e7Oz8yHTR+l3phHR+Fpm
VlSqGLzfg5eNF+bTVZmK2rqqmkzdXZdVCwkWd00FA5JthEkEcK8PTs4Nvnpxm8nH
Uy4ma7ZqUVx80/+iZBuGsJObgrU6Qa2KtJNJ8tudpcW4l4Kic2pNXSqBTZr9lMXh
oXQQI3uIygXvD/wTVZQSJrClzBCXlH0tpfLI0BT0rRHAxdcbQjhly1rZwoyAXZWi
ZlcPgrS2/ngwQgnmDTd2cOU1XAtGbXgtnwemXJ8soLBn5bBTsJZyVDcFhy4uIMtK
yLiGvYeme7MvEm9tMzunJc7/oa/oUXCOOocHjrQqcpCepW72NTSXdnZjxKKhU1zP
Ss5Hp47YtldBzefSYqnwi7Way4Cu6r9WK8YL3E+4C9SWuGoq4LHSQ9dadlYspX7K
i8VgI4l0y1R9GTHOqU0ow/04yuzVy6CDb/JYAQu+7eubBnb1MTxdrVsXUhShDeUO
ON5fuQ5UY/WlEa+QxS1X6aFbKW+wtUAJC6lbqVT5UaJId3hxB62gWkLT4rvdtoOL
sRcsFluFOOTPZU7JItSXNsgrZEFT+dUgUp9zkmVIAU/b4TZUCda1S0tFh91iXgTH
Y9MsKzaVUivhZfioko6xOCRWZTuPPcmcb2yB/3xoZWAKlOESOleKTQzIFgKlMTcA
uh3CUjinjh7DWWYt9e7jVz4qjPpnnXqV39dXGoyNlPEJyOTiU+Z6r/tSRgkxyslK
t6K+4MJTL1RsbtOQQR7EjaZyyaourpSWrsE5Zsvn57kWt3JAKnJba6Fgb4Q7QYQY
BrrBUrUARzlPCckudwlQMxmVohr0jHCPQoEzqCC1jqBcd+o4guviCU7v0t/SVkix
is56a1zXTaerNK+YeuqlupZNbqVDaN53QbXABuRkNNvi7UoWT4QIGXIkyQ4vTXFl
K7FL5ITf2UjRDBd1WaxjI5NyT1fgjuTqUcYsExkqWWHTzlVsdJ6WDGhoMXI2m3xT
mC0ZfOJYsHrq5LE+o9tUYJ5PAZJyqKqXNXcl/UV4HgKWVoDjBje5U+DhinwLq9B7
bAzy2NAs8AD4AGxZO01kmDURUONPx+9XQX3YLgUrQYnE2ZsxNW37mHyaynUZGW05
2UGiFt/9uoGWw1fuUJqSvufYGU5zHzl3ZVq1SFlOu8xzh5w37KuE1UXeN4Yl4J3w
Lt3wXeCNwLhgDpLaLIGIDwYQQbj614ya0Rx4toPpxIn5hh8ByAOry018qckkKQ7V
cL7hJWMgTIIH2TWSIvnjZQX4nST5B0a34FWpn7+rEz/S/oX9EUpdvAbwijHBF2cl
X1lkj6GKO3kmCXJykklmf1Gju8S76fuLRWiFyW3W+I4iNuSXcisEdr+lvj6Vn5YC
2r5I/5wd90cbiGMB270CTARxBMoBAGmYscOBhM6EmwsYB7XHhQDmQQPWNDi31nlT
7lGP2HGHQMvyL/yPbuwXUz6A19Z31sWL5s2ZPGCRzowldApphjV9ETSFRM0M75gn
yYesk6+TR/t8cidhGnT9eF1k/XDdif0QGMZjsvtQbxy2Hnn3ET6HMukSRWum1b26
8z4Yozh0PPTdi2fJVPeCOQhbrnVSVVNRWRn++EoNfyJOFIZkuVND0etk5oLd9q6+
4P5i1+skppWDy9l1NvfzYh97kr73KMe8CDAuevDgfh3xxNtmsgi9lnBC9hPa2G+T
lU69xm3a3G8+NX/c4XNqNjudjvkt/9GJXYJjX/nyZ2x4R5qYQ+z68fr+6i7G9Gfq
xapFs7bVpP1RTz3fT+ufLw1bb8TNvEDlT/nOp/DypluOtgITX+GQUp7obAW1wn0U
kodz5QpGFu0eeHV7m6vCRHVLRaMz9vGG8/KW//FEeztZVQLa0QZjDBcdNDUXNrwQ
2WZs32ElzIHeoea6QUtRcjgNfJIl7jBOmCg0Kdpweg4Hn1GWGXXD0OfJttk1R2NR
ejp6ZeXEpbbCcEUHU01rKssIdSl4aud6p11LX/dW9wpde3eyNY7yib778ee4/Iqs
W7b9DTfyMCWhq4xMppQOC+sSRxbIRxGN15Si+kozPXfVqXOdxaTTeseaCTWTOPj4
3WmDcyU3jBr6bY1FFWw4nES2SfPqapSizqqY7oWGoaysachkMhmX7jWheJ1C7aiC
mvry0tKKgTk69PFFup79nDkX08ZYRblZ9zjglwRCTIvU+v5Q2JlbEOvLfI0EIoPv
7Yz6jLX+5kp/j/KDoZCt+YMnXfKzy/dpI34bjdukc8S8dmt2qvIFW0vLSCtDZzUd
Be6Y5hozzV1o4YCyhoC1pVhRSx4m+U2fDaDfpnW/xUiBynXo8b+x9xZgVT1b//ih
U0I6hIPS3SEh3d0pDdLd3dIlIY0ISCPd3SkNCijdjYTUn4N6r9+47+W97/v8nt/z
//mBOXv22mutWbNmz5zZM3Nmv69I1M8zyyOLt0tf8BxbI1XQno/n4lHIZxweyD9M
o2JJHh40PZm3YuToLIqlnSMLbEmyLP2os8x8ylxA0iY8w9xp9OTzEFe8MTJuY23q
16ToNZk0K22nN57Xy3nfmvX4Ftlm6DkaU+p0UjhSQwzDPaU+4nZ3Fodym9kea00H
KSFsyQbOyaktdLl24rY8FFUT2xVzn2Fv2K7tSAhOWNR4ffoqq9BFf/gEj07N4QiZ
NmwhyrSD9JMbVnX6ttthAxWB23FtkGNWc/i6FZFRc6zt9BN9AxnP4oqcqTkr1xbb
yCu4uSUTGCkYmiyerJHe1UO74yIThMO0UvwPhPtX1DtKR3uj84xelmcDer3vVwwo
sDeoO5PkDPtdibZE41+RGL2jKeFbUmZjb5Zi+FQY4WhWHafBjUS6O9cwo1Q4ysfP
yiabfXBpQkFAI2UjE9GFgRffiSIZ4hW6WDG74P1aZNk+SCSxHjjHy6ccj6EJ0F6i
6tdIq2a1ckpLMUbAxQgtgodOT5qQ0z0oRtNKHIhN7FssHtmQC0l5QEAyHAiQ6H0y
mVIjHsqS8jDBc9nbNsoaloTorU0PHMEzmm9wk97OzIDMFjmyp2hOCDkRiaNGZr1d
On6OvVicpMr8CZMNSj5xhW/kCl7M57eofhTSKSwkCN3ue1GRZqho+jyy7o1kEA6K
d1a5giGUGN8gjJFwqSSiK9uNr4spz3TC2UUVy8D5KrHdugzF6GRajmHAKIsEXX6J
sbncDAQyt1s3IQPWm+B0EiQvr25Nx5muQbvVL4vxS13h0wqJF4tFtl+xX3/JxGUc
xUVXqA+2YsjLsRmTG+smTf08bvHRHJc/UHoUb78vmn4M42nIUbygljPHhoOrX0rX
A1TSdugQClVZErfwB3kUhKmu5y9nPPPNtBrf+nG2pK+iFIcZtSUzfaBdlWqI5PSD
kJROuTzU5Dhc4cS+4LQuQWk3dxix7NTvsTemZSpm7TsjVzYsLGPDS7YgnHZwZSCy
ZUJUDp1PSYsg6VHrEBLPyDAlvCaCiTvj4qdS8eSbyDDuab/g6ua+1Ec+epstMqBc
OF7TqYf5kJU3cGCbnSt3ijv7qo4qs9ljlPZ51n7wCJp64AmrEFnHt1T1xlYd4Ths
jEYehEY4o9belQNqjnjnZh3duYZr8qe5nw6MpiAQLrn28uZxdti60Dw5Dv2u7JQ/
n3EzYHI+TOg9fZPreJYJ86rcyGBocDmCMm9IPkEtbo56sHyg33zoWqXKJM9zA+fG
vm2/xNydYxwBGX0Kx/+ZvObGBrtLnZ+wNqG7TBdzwQTm+08sQa/mRTQ+xLBVE60c
TA2mF4p0b3f7yyRFrmS6ZEHvBCBEEl+OdH4Lbd6NfEeFxi0w9SUa9nm9bM3bEq5R
pJwS99V6/TAy6QiHXU1v2nrLZufOyWTl52WPtCy0484UFhUXBRd3JklyeaK6hE+u
rZcPgpz0vS27unKUty7QxEcanxqVlXXWhTrg2cu/zhqr+/hxLWpMkrX884BTUqzR
vM5zndVVOc9KxkGdFmcJzXRlQdL6vNlx4xippsGIOaSm2fcz74dtxok4t9F1Y6x7
NvBvxOn9OeGthNux+1uvYesjHLTx5tG05s+7e54YmbYTC9cj5bqTPlc/y1joggk3
PYh+UqQnHFZHP0shUfPgY4ZxKRFDmx2txW6ElvXQTDlmXG+0G51F8fVxYRcZ2g0v
Yf+C0866PoOXGM6U8bpAF79TIKd9+hLPWmOAE1Yy4pAymRN+RZiaF6Y73XHtimCT
Z5JhcPaUrdO3xojuo+6BwK4o+Q/4tcReSstG3YNDyYdW5PQTwurHRRtr6pjT6n5S
54GXvm2iRbVPVVO1H+XT0q+P2ePkZHTLvxgaHkbGgT+Mi/m6apYyZaTFYiFwcFKI
F0rYU1fv7HV9HWWI8GmjacLO6yAydOJhI+e6vG8mZUKM314v7UlxaC1leOvJ/hA9
MlXabH6pjDkPOhuXkBscFZ2uIUkhMZ2qpfGJOOa4Zt3geIbNS9jiRMl4ykPhEhwM
0mdw1Xk7zDnKiuhH+2jUBevE2awPxSvTGLjt3ot6SpWyTLfq7SqZh19A7gbMap5A
HbnI5XQOhLr321zMqb+a39VvmpQUaM+jvTRkn3XIzTN71ES6RubFIa8YVqQYsrYk
cSr63EdUJuwMIb+iQsW8ch+KCy9agqaQtJnlhqdf6/wm+ibZ3YP+s3m0Yfp6d7mz
m1y2c2R4jQReC4tISfZRu5IvVS1PQ6P1QfGXTa1dI41pm8ACaU75uRp19B5JLGIc
hdXYgfj+bkPaui/yspUFo0UZz6t9q4M08oqLbENT32rAyQh4u1pYNleZxM5JuMM3
vB7s/ughRpi+efn0PfdYmr4ctt4cmR4a2eji3FJxsquukH7SUraDc10Hgpj5J8/i
xNFHD6oeQ7aOLIvAUDsY5dZKCy6tPlVdb184frqDESCjyaA+FYeDWUJkPphf6tX+
tn33gdvTatqv6n1ttEKY1TrTdYJ9r4dtOvv6zdqHCl2Cc2lnj4fc9i5zyA/Uug6H
Kld8UmDdGCbPe7ut0vUMR4QkQmz7wNWGwqpmJPYI2e0vIjbKky+LZZ8rD3WuVc3Z
r+FRKkc/O2fzDNoNYk9uyJFEkPUOGM2ZMVIfruwyh7bCdCFWwax99Fp61dGa7EiU
VCCpdRt1tSraraeoLtuy1GbbTeQ1/rBem2GEbDy7lC6ysTRbXHYcatz7lf2HUbIh
XPIdO6oxE19md2bXXtWlaqT4DWUNLUk/4tgZ8i6fpeBsbDILlN7L+DSufhasto+m
vywZMfxyYhiLjDbFYjvdOcCsNRqaAKs+SH8a2UDx4z4sYXsZP470YI6lLrNNaS+s
kopyENNZ18FxW0qbHTdVMaeVvlbdxret1zIRksRPq4Ttyj5TFGtOM15ZOhosDoqg
Ld4oVZKpiTbLdF7TMD+hWXCsxnHqtzsYNCZqEqJpZctHYOYQRlJV5Vqkwq60H3j9
2VW64qCPhTshjrWo0XziEgn9iu3mMXTm36wYAq3GAEXYWRg4/rFg6Of7ff9bC4ZU
ZKRE1RV/LGX5vjDlb5YMMYGW0dx7ydDdApW/XzLExMQE/8fFOf/u718v/Pl3S4a+
/4FeOfvv/kALmX5dDHSX3b+68u8XA/0rD94tB+IALZL553IgFga272+nZWBi4wBy
cLD9aTUQDet/ezkQKIV/sxqI/Q+Lgf7wdloGUIH8shiI6fu7n39xxa/L0H4sBmL6
/kLnfywGYqVnvcfLacNVH7ijT1Q+WxvaHrJk7ZVueoaZqBbonzgYE8XLz0+cHBnu
Q8ILXLcEzACIgn3fEo9mwL77yof16uygUJ2GHAVV1oiNl00OTOPi8tvBsYmXqRL8
Dp06pS+hUBF/2d6Aedj+/JbZ2hD3aZrd9em83VCj0+qQfVFjJZSeLpP1F/WmulqI
Y6qDJ5QnNNpTJCIuaBjQN30RkxNyPEMyl2WTSlsqwudvgwA1+hY0g1RvuDRzymrC
IeUIcmU5Mi0cVJxeybi/7jtWMouPXI/1FHa/3FzdjT7gw9NuynZxkEBPz9mwezpp
7xi+H66IaV9ogdOahdUyXQ8Or2vgTY6YR9+mIoskpQOAfrzczg9Qbt30yX278QBA
JX1j81Xe7HwqB3FQxnvOzMtOk8rLDN+8yd703YQeJq2cWXnEFPq4dCIDF0y+/on2
069X7qE428AXISP92ObUzmk7ZG9DdxDiMGvbzLXTE+XfxRHx6advhEpRzyq+bnFd
QFlZevUsd0AAbKT2VYJ8jphuY+Yj3Ca2CkW6b6vM6JakVVaOjZMaVukFtOpdHUIS
dmoV1OSj1m7fZudwm3NLSqn71qQjDtHKXjhH7xDhPZvKi3vBswLfl0x+xHyW1vTq
/YjRqkHRzG6TpEbmV/ZPUi/nxi2rLRctVRDz0NZw1+C3j/oecol47I5vkKbSTpgE
SB85mE5skF4q4mnldju4iuaePy36sKGZWjySd9vveMWTZR8xmnuWR4V6iEKMfiT7
6kNcEC3cxUhY/Af0jWt6dU0ShbditpWKorWiTdJ9WfJv3N0sU5ffmg8XRYujoLSG
IUpGxQuXJybq2AYcfCkJqu54YBEMYYdNxV9bni3OFN8KKHmgInnO0OdO7lRkH6be
/xQBWA5BtBHDFDYV9HYvuxROYNRJPjGTSuxbPTO5BxU3nQfNYMzzfm7gV7TN91Ho
8W1cmY4rgTNgCUofSQfJlqCzLU3i7EMLC5Rn8qzV3q6Mv6OoFjvsg3wgZmfg8WqL
eHP13TKpoZQl9sG75RhPWgyOrzkB6mNZowYmRcxi7QFvG9atpwQt+kdCskYFcc0b
eEI01LGNI5gSjt2Jj7fRXF0D0sL5ZbI/MGmtU2C65sBzQ/HLNH1YQnEt8097z19G
MUKctCj1Pgc7tteA+YDUCFzBlt22a+WDo3iZ3Dj8kxK55yWhkgVoRPCIUohGPkkd
LonGfBiu42j9reWSys1qGf4MOZliLORK70hdW8ZU44ql7Zzb+A2a1Bf337U1CM0D
Fz14YvLNzbAzR/C6EKXsI6WkCk9OxgqNZu1KpKienM5uHfFt1oUch3TgwGVXstzA
HGzxe4UvdVNddecrHw1ofJaJ3d1Be2sGpYeF8inrPTduMo+yx3R5S8Eu4ZYCQqW4
QeFwFk8N7/Ptne61/Yz6HML0Cfj06vT+9rXZIxaOBJWlI5cXpvb4ilEp1sMmUAuS
e/wBgX7wY/VPI7rJpUdsKrbf1CjioD/KfdunstC1UD5OuGwK9TXBEbpro8bGxLi4
BQoG3UlKlogfe9OMtxtR8EK+v5LIL0YQhRPV94NytP1Lf8kt4aIr1EV8H0ncAMlR
kUX7/qy5Fx5ybDaHyInsg5sFfleRNfGUQe1zxUVxLvMZcPnuEwYpyjkhj5iOXSL7
E99PsQKs7NZaFvfzGMTjTOXyM948niOK129iUGaJEc0oLIrZODkOrwJzfbQ9NvKe
OAJPjoMqNS4pRLlkUo4ruOhJ/nH42E4V2Czbm4diKbz6mrr2KlNF9nx19Y1Gx7v4
tZaPKOpbslZp999hPJCazwDWKCU0d4mU+RIaYIZy4nOgYkg/1q2FXq6R+/JuwJwA
TJ45YmiwvfZhPHtdnXuENGNeefkWfDu+VtLAiBDeOD0Ax3U3QJIHbxTssVemuzJV
0KcnWMxz+0k96TPpJvUEOL2KH76C4wftfIBpfOULfIxMpcNtnnX80B0ezBl+t7v9
A1x1K0H+s0i6MiRXZKtA5nXvz/xgttHVX4CzPjbHEdL+U1+INZFPRRx1HqoCIfJ1
aY7tSmz3hGh1aOb5IxHwxlvc2fu0vE+jjadwRx+kopI1Ng/uE1rHDJLWowGhxHVI
B3w6DcbGDPb2vggMMCiKSI/hfYRCeLH81ZpwO3DKBsZMt7qMe7YgMCC6+zEz/FcD
X/N3AY78Dm0yCwyHS3ZhrcTucM9WR8+7g5pxr2nLgrjSYRUyHs5aU7kcMTaAeXlH
LuzVoKgwwpgtP3WG+IwrFo5Pmtw9Gm2Ame361OlMF8L8zUtuML6q5E88l4f71ceA
ZXKO3s2H5E9uksmVyRYgJFsQB9qCVYMQSh85LZCQlso7kn1qb1pB1ETK1rNkc/Ln
7ExdbVreOrO8RssiiUE7EPz4eC46NXop+pmcJEmPz8z4ml4NalJvQXpbqjWbefaM
a8ooWinaSZscrMAzxBZOa9xrQeNsKwYCBJun8UvimgFzx/hPfZu72A4sqvxZynOn
xaQXkl5sc1dQmJ65uJPdnNAjyuDN8+DjXw+LuhOju5Acqhm8fEMhN1BO/kZ6nx8h
3B15Fjly9CXMF5R3r6C/CDxdu4p7bJxDrMeYswDZAJ2aGNnJjoxXCqfxHmFqScuZ
8ORL1hl7/rTIJH775wUYZ8zmlhJyRnQjI11l0vcH1JEcM8SsQZVlNIVBjwxEphFe
zes1G++VI890b0ucPEpoIVHAHTa0c5iltmSoDtxanbTDq4VAH2arYeKSOTJesTvj
uja+fH6NckPqFXEzpMMwa+z8Yf/lgn57tzB9SJdZ+FGYRZcXW2C4Fwp7Jp8qhTk6
K5wTnMjGTm4iEv9LR5EorsZFvdAFMWeYyFbC9wkSRjDWBG64hF3OtI8sVz2Dbwz3
W4bVOBTep2XberU71CDJ1xjvP9b0zwoz3svy88J1akWoiK0qT1Zjs+rEOzM+I9pe
/LzKwQrbuO3LmsLw2ivpeeHW+lUdrrFsEYZye4kqYwNfbp3bF7J9vLO4kQHXF/NO
vKwFfnnsCsl4JxwpWXPR3hjWaDuxRLMW63oyixazapi3LkThDB97oFUaM7/upEeY
3N7o41dx9Dzj62Irq3JIvw4sT2vuPloVyubMXGmyFcslgUwmxBr2xxdXYF6Byb1F
BmLb51RtD4sIfNsr0KTbzHeVVMOQP+w+68Wnjy3yIavBOiixxmbbL9LEU5sZdG5I
PmnjW1/adEZQbNXdpcdv95itX/cWcGeb90UWnhWQ+GKmT3eDj8WMfqT/uATZy9/t
oKgHcPFQ/HGJHUKQxoENj9/JCvTHRjMKfkx23h3CXDJhusR38UIXBzzqJRTH5kxj
tCXZZFPmNajNbx7ZsQnlYdvpIOEhs5WL87GSjrG1Ck4Tjjge0lg/8GzZy1pr9y4o
G1FiWPp4uGGYPSaeI01BmaIZ9az39VpPI6mxnuMkpGGDVnxX+CP9/gFRGQkpMWlx
SZSiA5v38djlYvS4L5RRD2fFi7SVy68o04vGJzhYnpuQ8h1hgDdTxr47MQ2jNNtJ
EnPAGBXqibuB2Ah5rJUlir5iS+602msppCwzSW4/bm66L381j9tJVrD21bXx+Vq5
A2kEdn2qes/ucRWumlDztrLZVCXU7DWuMQE0DcOEuINEGBOyLwNmvvq7nByKR3yS
yT6uAdm1/b720JFPCCcks7uKjMjHX9UtlM0OUo27PHjuFD5oecpxpFj4vJhagc+N
iNMeVnGr/V2XqdKHoOhPSrYwVb2tDWg+O7qo8eeP3lO9whgMbaSckvSomYCECdfI
ypljTbx+IpE6lqfTH6eOh2WdW92Py44y/bigHrdBpaJyppLAnWfT72NZobpXRnzg
vLRCwMa5QYpR06r4eB5mZ5HYJVtvvlqe/EdwtnMTfkYIygFtK2RDo7pvT4yBYzQw
uI0hWkWlFE2rSQytBrAD2p8TFmKYiifZj3z1+JmTWp23RElYd/vEEYSe5o+ZPdUs
cFmNDERjCX312v6b7MoKo9qiUk+0Ca7Ja2iflTHyTfvzKPU8qhe4H5XsKp8B401s
4UnyA6nloiG0IaTqba/LC0gGnzzUjz9jeSFuYRNGS4+R7PWuACkoKbmgCCEziTTG
PCXzSCHVZautUHUDZaM9N7EN5qhhfEAlXoah+lOl2hymYyuj3vjgg3lyunZGDVjN
c3tLfU8pu0UYqT5+qfJzmMEXds38/aelJ0rgFPkUbsdVIXliu1WMGAo3hA4Sintq
Gc7rL0nrIa6jszdNGkJCNyu95WdF2eQVYvMbU8JNJJJNB7o21NWDQ5OFiTqc9ZV4
Qi2zmmJU/KHQaIS0fG2LKL9tvRnH0q+ONH/lNUmOf85vlo31jBXPRoDGLgwbl0Uj
1RPDK87lPdjQmCgy7qqJOTykXvHoxOgTapR3SssfvZ99wI8wf57T8+bhurHbzDxv
UDIBzwjOAxHoqpnxjzs8ttkP+l/MMb6Dp6ypJFpvK0JIarg6hqKwsjgOxC4z9Yob
Xhv3PPgwtez5TVce16VjH556EeypGkXqgjf6RwPwqwXGURekdWr5XImKyGGvncVr
lulnvNEUN8tvbmTs40ZwNpBqwsz2mW2OP0x5SkaHZN2Il/sipneLLfu0iPPrfGln
36CHYfBV5vCN0mXEZeaGQCq4GAiNGBEZYlsRWLHrCF35KrAiy+dwwBjdC3UC6caP
ifrtYVA/o9NiWT8ggXdV5kW0eojuCbWGlH4fLaoVjONLtwHvIKCftkrcbsb8Jkyn
FTTRzeWy79uH9aXMySsGumewHug6y9E9apY5C49Mt7jEJ2MdCkf5b8RR2KKUDCHP
8faPnxeDMVquX3YeGShB4RDroFbZ9MpoXlPPWe9eoB/qoroQvClBourZ9zZTTjIX
S2QUfhJFTYZFXNBrv/m+L+x6Lyz6A6twzBGDNmYxUwZ1yBJggyUsxlxkQJc6T7Fi
TbX11WszU2y6QDlrEtUNZKCfuhvM4xDZT1G7PU6v6PhsLcWuzjkW2b4m6UYQYRda
vwoVkLWcZuy1CTo7XAZX9ZWIv+xYIOd30/3IHh8zECbc+s4AAyMe3SzPefPVdvBM
iAfqo0BoR1bHvebrVWPtBruZiIXTIR6bT9uLW31GdB+/NO8uLBC18yZVHLUJtC4o
5O5iJ0xyssrZDKk7mqis17wStvuAw9Gfe8i0rmFcT5XzykzGsvKqrSfXzEsBMwRO
QVy/iqS0s8rRxs+l8exdr46ktFRTl2b481UWnCK0RSxVa36ws8wgI8CZYO9jA1F7
/sM+VW/E5pcycQHbDMp0HaEH1PNMjkkiyVNW9lN0k+m5wKiLNaohsvhVOhz0IGgy
rKgxCfxlt6SRd2HDaU9JbPjldE1DolKLwtjkUeRD4UM5LqKTJOrTPOi8a05bCoi2
G2y+FgvNPd+LdXYapaJLddnhSHFaz059T2MG0e5Va7Y16TXW2NBCQL/tJzm92Zdq
qGWiZTyn50F8PfI2d3AzEU1/iLTzQ9sCsB0+OL7BX1U/sEOtUJvY34ad2JEE6Qs9
MYOGdtkUPp5RlaxmwgqUURaGMYTdsn8/I5EVfKLQERKTMVL5I48qE4+PgaqLNezO
0Smj6xmrJBYvQ/xHO+QPWAYHqZMGDtB622OIs9+S5/lTPUQfeuf2cq1L6Xl9n1KU
y1rEe07xeXPYcIT5tPg4jesvAnAKdrN9wpNNjx44IVrN8ti/faJEULKj/c21SdTl
MZfk7E1TGPHDjQvzx6kUVh8mRDWPxQzfHpHO0lc3FeeNyNVWNbrE2RmpHOWfrHwN
3/9cCYCj+OvQ293YByjCDBo0+klk+kEkt9DVl1EAKhva2plYWQIZ6GkZmGmZgJrk
/A4m5gZABnZBBnoOTQqgnIOurb0rUFZQWMDK0t7Q2f4upTtVzD9VCT5lpGdkoGdm
5GBgZmBkpFenpye7/f8H568DM7K2VgYO+oa2oBGgu6EZgVub7W9NENS1NwTe6bwl
SlkZ/Hr+z0EeZ1tDI3h6IBMLPP0/AGRlYWFiARoBv9OY2Vg5bsXurlj+oNEzcTBw
/InGwMDB8mfaLUCDeH+kMbFz/IWPmZ6R6a/6/kKjZ2H9K42diYPlz7K37mP9E42J
CTT89kcaMyMLB/2f9TEzgor6zzT2v9KYQD8d/DON7c9p0DMzM/4lDRZW+r/oY2H9
q//Ymdj+4nt2ZtDQ3B9ot776iz4Gxlur/0K7deBfaOx/KaNbX9H/2c9MTKwcf+X7
a5nf+pT1rzQOxj/bfJsLdvY/09jufsf5Zxrbn/18e0+y/GKLva2uibmh7V2FUDBx
vb3PWYB08lZW9kDQ3QKqAGKWRlbA7yOcdGKCQA0gl+5tSelysLMychiys7IyGhjQ
352y6rLp6xrRMxvwwP97lu+/I7Wzv63SdxWJme22rsCTkAjJCMPDAZgBAICSpbWu
ia2hAdAeaG9oZw+0MgLyyQoApYTFQFF+dvlb8q31FrcV2NrKzsTexNEQAA+gBgP8
ATe3gAT/fvzjlf83AXLDTx9B3oanAJTbT1TADQAcAAa4+M5xUwOg/nEd7h+S34H6
I/wZnADY20+QYpjbwHUnDw/4Lg/S+K8A4gEdYYHutzGC/4bE/za4Abi3msEBmN8z
dAesH0fQ9QyA6N317+FXrp8cv+JXyb8DDwD67jrYrbZNwM+8f6d8TwEC8L0EoG4D
iBfkV5CPQf4B+QDhNiDehge3Aek2IN+G72UJADy8DWi3Af02YAC+WwuyCPs24NwG
UE7xbgP+bXh0G54BgIDvKYJSvrs9oEGy3+0HXQPReO/0K+rqOZjr2gJtDe0czO3t
fpH9B2C/84NkQfpA4P2u9e+ZQUz3Zgad35sZ5MB7M4M8fW9mUJHcmxlUdv8lM+gU
FIC3RQYq5J+F/Z0Z5HYhO3sTi7vuCVDW3Mr+XyT0s/L8KSF4IBDwV+afNeknMwLw
v2AG3W73Zgbdl/dmBt3A92YG3en3ZgZViXszg5x8b2ZQJbs3M6g23psZVG3vzQyq
o/dmBjUE92YGtRj3ZgY1LfdmBrVB92YGNVb3Zga1avdmBjV/92YGtZP3ZgY1qH/D
LAwQvW1goGEhATqgm/g3fuM3/n8BUPX+QyPwA6BG4D+B9m23RRsA6mL8+crfYc/r
/9bjT5+A8gLqiIGOIPzoOoH4/qMA0jF+p+n1nV4Qcu6+C+8aWsBdK3wXQFdzAR6A
f5YPqFG+vlUC+gKXBTrqmjsYAsm/P2FS/GD5z6G5foJY5vHl2a3+m+sbACooYRD+
aQLIwF9NsAfagvp0PxX8z6GOq/rG4NHqDxPA/sYEUPK/miAPtLNx0L190P6p4n+K
8PIBN+QvZT9MAP8bE36a8dMEQRMjI0NbQ0t9Q6Ceob2ToaEl0MJQ19Lup8b/ELIt
302A+BsTQHfGryZIWjkZ2gL1rSyNTAzuDDE3sTCx/6npP0AUymfltxS2P0yA/BsT
QI8bv5qgZG39v2sCEVFTkaiCAe93E6D+xgRQTfzVBOH/7duRmxEiY/Pg4Q8ToP/G
BNCTzt9WSuH/pUopsz/a7ro9+ON2hPmHCXn/GOMAXfnJ/dOEn+c/WxQQ7ifxs9sH
wv0kfv3uuJ/Eb6tAuJ/Eb6tAuJ/Eb6tAuJ/Eb6tAuJ/Eb6tAuJ/Eb6tAuJ/Eb6tA
uJ/Eb6tAuJ/Eb6tAuJ/E/2mrHgBBz0SgUWSQHlDqPwMx4PsoPvltYP9xDqKDaCCA
hqkF9e1p6GiAjna0QBVFLwg4MAh4MBiw73kAff58hAfFQamCnpB+5nCBl8MblCYE
YPku7QVvOIAs4G9nqkmAAoLMzOZWAoIMjIzmVkDyn3PVVBS0QAErC2sT81t+JloG
diAVkIWW4/aT4/aEloGNFgj4+1lsKPA/+uj/ZYDc8NNHoMfo77PYe7dUCMB9ZrFv
Oe8eNv8MzjtuEP45g/1z4utfAfHH9X/OYN9X4n8b3D9qVsbd2BcoDgq/Z5cB/w1m
0Pm9mX82W/di/r9odvln+M78e3b5O2B/zy7/Atjfs8u/APb37PJv/MZv/J8HqHr/
oRH4AVAj8J/g9+zyfx1AOr7PLv/9s+mfcdf8/sD9JH423SDcT+LX8r+fxG+rQLif
xG+rQLifxG+rQLifxG+rQLifxG+rQLifxG+rQLifxG+rQLifxG+rQLifxG+rQLif
xP9pq/45QwSiglL/GYgB/8kMEfgfZogUHxJ70RJ9/tsZIg7eBW+Q7RAAHQD+LfHV
L9dAAM1Z/Dq381/l6H8TYKChWzCd2xj8XZ6/+xMCDPbuSAuGfXcEv80l6AgDBnE3
Wo0IDnYrCYoh3BUISFIAGQgYuNP40yPfjyCP/tPTwDva3wGU4e9lBYEM+wud8a68
/hXgkOPrAAASWUFhGgZaJniSjpXDla3co4wPHV3wP3/7/cteeyzff6367zbX29GQ
iMTrRm06LVmX8FbDfrvaC4MCfBkH5EUSQ2TYJ+ojmlGND9Pqno97RN7M81klMk0F
meOtPT24WEsZu5aWwsTX9c381ciDgjN9av05xfc824u72OlNwdrde0uhCcNKDV4R
Su5NMPwK8Qdy1w9dUV6mk1w/66g+kGrxVydTfLrRSci78GmNuVaJEhmVt/Fzv8FV
h31TyYI9CuKhtGQJx5WI7JIG6+WX/j3CpYRc1YmTigilGfNPV+9DJxjSCJZCx4Lx
U+Y7mgMWS5xsFCy3VN33WpCRLtt9nJC4PJY+NOO/dJLLaW5GOJzxmloz6Tq6qD87
df6mf3kFZyYeKFGM//aFrbx/A3pQXfig52Mhammn9/n5qsTxNxuXV/ZYik0wXjHW
aSlTzwvX0vGpMv0sULdxtoM6rk9qSupPYIkYo0JI+mza3yGnrq+CKY931m2BS0Gk
m+KX4b6ZSK6A88tgXSL7kGM6EnCCcbh3k/5R81jyqEfExuOrGTSYQ99y9ursbmpv
rdXhEP3+UOSEMXnOt2RP7SIZ1ekQ7PIhTgGGfelQnt654sMh2RrdUc6LLzEHvfMy
R/M4mo2Lqbhuz0Y529knPf1ZafylKtmumoSTda8ibOSSuyZvE5XrM7Ub4XRIcN+u
lnA1mFI3sKApQzoZjNwfGK7bPp1EuFjl0Dp5nuiXk4aD7Ux2sWo8LEh7KnEq+QnX
4fP43MMLI287fo/N7PTGWJz6ldVmFI9V9zKvkxlOldXbE4u0T2wLL+usSCPNKefY
bIbilky95jXTJUeaxRy/rPMjfTqMMr9GN9dt1QvcJ2EQMLK1FuW326lMoTCZkYpq
4DTJYn+sZel0kBpyfYgx5HhRzFPFJWZ1utFQ/Qx/M8esrSBhJssJxynIIsghyhaM
L+34o3QaQy/6PlFTG0ViJRQHMn8VfGWATmUA1fRLF9a2HCMjKZ6kUV4P46GXPppT
cGotXIwyK7zSo9iJIkZE4D1V+AYCvAJDKeTe7oUP8cDTsjWVaN5H1z2JgHcnaJwh
W4xrcbFHK/v4dSvXmmCuoxBJSkZLJwPG1NnTftE1od6/eF9t08Fj1rFUJ4SSvjAE
s0KwEe+dwheuumD1vTkuPq27GOFEWwCOj08TMSUW6mEbOqxNH+MOND/4a9uHTyMR
u21G4WmzFAZSX2iyy5WKaFMe0NQQiROXvyj9EnhsSZ8XuKx5mFzE1wUneDgZ5ldA
b5006oe25X30RbCLmf19mTKhLGVsPvGTaEIrVECkSENaFnyjUk1mxEs1CFdYeBsm
FEmEJp7QRHZyPBLelNh1a4iDA5Fsg0RhLRFDJInkuuvkKs5dOe2V5E9awV6x8lSY
CHouQuHgebKXnJSVjN5rbDhzwgQC8N8g+yCcT4fl8hxKW+lX9elayjgNzlGQx4WV
5T9VaA/2yHNa+PVAPC4CPMgs5iLow3wTEM1k15w8xev0aa6YIvL9ZhfLhzd1obl7
FVXiG36KOQX2i3H85WI7psor/CRtJurBI/AZ09uGHx2VcwbLpquYVmUTucR8WI+D
ehSZRePSFRt51bK2qqSoPZNNR/MoX5U+uzzFK9l+gzk35TmUR2BrOrkErkKvl0+Q
3uMp7Ius+Izua4S8Lu3nl+bYUVAuMQFJTpciE07hl0/GOc2ef9VV7XCaYAsK3tx6
v1nODU1q2JZ7VtkjI8oRsImBogyF6fNt5NEcnurhOStiHerWVPC4kQHJBnNZdcnY
u5mFrYqCLqHkN2qV0qSezU/Bd0yt+xxGMbBP9UsZTVG3tAz68DWXs6sJrnd4GU/G
45wlCRYqm+mCLIKZumS6HL4KgYeMWhPuy7B5QkdcDyT4CXd5xReej4d3pSttZqaS
V2rlKaJ+VoR7D2UakaOoBqcNZlY2lzGOY/fsmZVKaS6l7AosmaJ0pcLUO0dM/oxP
W9Lc3DMZ+cpl+UeCJ6Yr9AlJFVhzS/m2o6+p6hAW7Y6YFca1xDgwdmBDg9cKKpjW
outHX9Ur8WCFRA/PdFXYdvtgDm6QI5ZH6D/ZoiN8El38Mov+AQumdibFiEz+WE6K
OVt93FOMGTephw+FPTDIm6hfwi4JuA0uLy91hUO/NSKO7iTvlWnoVSSHDPvI1Xnd
dkgfOkoiG4rVWst+IZ8lt8jkwhW/8e1Rzhpi0JKkm2rSx/Wv/cZ9JR82E2BkmmDU
lDHhDdQYF/GGLyDfdjyQYt+pzIosT4kOuJ6HEMSQCu5RfaVMx93TbboHm/Vg42Fv
eROf/LkkdT2O0sVcBxuS2Hn/FDcwlz7vaXWjqOAJBnawpwY0zwrie+mvE6f+Wl7X
51hv14NoaOXO/NJjlQbQUNcbmh/YkO54a77RTUCeYlsuZNkYWlh+Olx2YfzkgTYQ
Tp5t5aPLA8JItFMe0gd06YxKkZvzj9mVtMoZglHVfIIDrWz2KIzF2hvBtaKva98t
yBqwFA5tl1/UM0RG9jKm8Uhqcbsdor/vRBF0p4ZATv/mVIFpx4Sd2NWDyLuO2Fou
bN012E+zieTANRc5kDnD+rX4Y9ZhYOYCVP4byr22/dlG67M3kzvTUv253NZg5o/c
oYhPmyimZXAQqAoXlOomvxZ179jXiQpYbauruFqnK6ZHNZqlm6/7JUvWkRiNCRwI
+yIWJ4NF7RBbEFyRFOLokp3WYavSb4MbeO7oZ/d7h2kIj0IsZ5j2lOx5MrEoy2Ft
intmDu0uKZmq57x5UCGtPyGjEo+PNpm8RRKD4xfgj0UFiV40Wz39JRez/rPKDphj
N//IF3k5OSlKIQlMicA56fO80ayIKLXAT+ZVO13vHQIGr2deJUsSvx4mTcrOGbOr
y/lyck7I5u9fdpBpMN4rG8uQy0as7xiLh52VpOnYXrGFEjzQA52LYaQInvxk4IFS
l4fYCppeb+murO4QJqzcSOADTdNj1byIcJgNRNFhg7yRsSclL44BM3WwCOEE7Cp1
TycVnr84RkRY5C5jcX1LVDq9jpNRPm41GNMpPAzwkMqCWSc1qhphsug8Hi8PTzMp
N/AeEkbWjJwL1s2C6UXRiJ4AwxyZUKr2k3gYY1z+/O1Ylq75ib3hbbO/cGA3ycZo
7kjgqyeBtshV5ciErrVg6F6c8lXbHyfA7VKSDqLNhU7/4wJk/ZuQgoDybGyEoNgF
zibz2jGzTu7aoY1BlE8D2dN0M48ies2TMvL4RXGBFuPx0P3tD/myW1uNBG4GNRjm
L0tf+yiyhxZhjD5ZHj8ryi1iQh+uHcV5OfNNmDht6Xy2nfl4WZoT70SHJqeirOfy
yHuLshR5C63fLpTQ1yqaP00jSCNNQzZqbbI3Zu3Yi0Lfu8LBdaW2vk7SWnsK1ezz
5suvVg7+SNsdDUoFTyZfTXBMxsWhOkngHEAXRqgWKIl0PJowfvsp5Dna3MqHFhiV
a1xAv5dQaH5ZE2bMp+IqJCyiWmEM9qRzqRYuZB/PK0EW0WSRjp0+s8cR8DP+zk3B
qy/6Mg9JBJeNAsLgBamOrAKphqFUuESEoXANlPz8m62qvn4QxK23a4NKQgvCYwja
GtQSp0ywdJR0rTV4+C02SoGIMtl4HGkIPF8qyoiDLLHf2tdVMlHwywbkEYk0vYp6
Cgqrux8HDlliJI20NxZEv6O2NP1a8vFeLnWthm2g28oi5yuKORfUGPbOWQebkLIV
FVqDEPavnZ1f51RzzipDDyy5lDLqeXJr1rR1JJ304oRK9DQNCquosA/jLzHCcPQd
HwjkLJfoSn5dVGEwgC/RA06nRAu9OT/vx77C4x/rleZ1h+pWIX25cRHf1W7+6TmS
yrQhDsTrKerqHe6Wx/BgoU2fbib73AhFVnlEul5qhaKf97AbozyGKMbZp/QVwqvV
AY4I46bho7f4hl+7h3YCxNumbAg810j4BID2HwntFYHJNdiYJPNn/SvHPTXEe69U
ED+nedKWKX5kycF26rqKN/e7UvGsORgTMyW7HhJRt0qsviZ+ZDsa/IIHoVtIkAu/
csSIAMzvjVzSLp1Xqmdi9BC357iruHFRN/PJcedW/c4yjEFwrODlAcwaUOlJDCD4
VeroN0ayuqa+KizoGF7yyc2XdlcBEHkGGXb8PvmfwU1x1Uif4cCZoxLHx28tX5qk
jD+ZtR8o7Xj5YuLFu/ZPHB+d9q6SF9Uh0mtGv8bJ+UBfFKUMiRe8keGcPrQ8E+iC
dQqfaMN1rrm+HJCkQT/94Eg3A+zFH/M7XbyB9lTrthzlFGTROWoz12N6W6Vq4bgh
6bhjp+Bokq83/i2DaQar7lT/OYwKw0dn/VwVdki2rkxWt/qnpTIvktDXWZF0Faif
B9pQkI+dUTfxFL3T6/cVQ5MJk8J+QvyASvwxQK2SjjKOiySN2YFdEMiedmLsnugs
T0SWBlAJsRxh0KgKWB5jFfVh/KQbdJaQN7P5tSxzzCS3VY24RL6RtASc+vDpeXSc
pKh0RQdVVa6Nxbnb8Zj0Z6jzxm21rCn5mnIRntrT/aK0K/F5t5swLefauJqQfr5M
nC2oErpr/7MUNamZryJEktUqK+Fcpo+iraD8eatqkmLdjPV5RCw5Chwfv2wZrzTx
Ejqnc31GjN4enh35YmpiJ5BbaOm6bgyS6aGgjticSippIJpyKql9G0Zu8AKe8t1p
GmmgZBGXVNi8ngP3apdtWc9aVxaFMl0URX8unKQYvKZLEnaT4QazTVVXAkfcU6ne
TYU4ZLEXOX1s+7gSW4a+bVeINIFqedEPXjaNv5jChFnbyzbHm/yWkVfTRVhBabY8
XPcMhX8tdESc8TWfMu0xNmnKjO4ujXNiSGpHrP0T8hIFX3FcCnfxqVR0G5E8j/Yt
zKf5UJw+VLXRvJK8BmMmve/kvqoZvGKOixm2eRr2oma2/8C+VJQ5/KkwlN72xaYX
tGOZ0V83NgM9aN5tQMbKxPyP9wz8ZRt8WV3ju09b0K70P3ZVkje0s3Kw1Te0A7L+
2HwMtKeZpb0d8Oe+Y4YGJrr8Vs5ADdC++kz0d0EL/p/7j4HkftnKTF/B0B6ocRsV
FL5N19DZHqgFUmpuZatgratvCASxCdgxAkEvEQAlZ8cEBL0Q4S7KAGQDRW+VA+mE
nO1FFOxBO56BJERu2Rh+mCxyy8fwwzqRW00MPx6zReyYgQzfcwFSANoX/3vmFW95
fmwcpah4q+fHDviKird6QJm64/9nhu7S+aPn/mkMnb4ukJ6WnZmN4VeJX5/9/1bi
V+afhfWvmP+g+Vfv/h3zrS0sv/KDHPinUQiGH66Wvi1zOj7QUITlnbSgoaOJvqG8
CP+/H6EIUNJ4iaeEfR3L0QtfPzT2cYLmrUCjPUW9RBXGXHZFkkZshRlu2cwEJl95
bKzBwDbxkOQoggel72JoQZMYX0MjDazvqGvrJMyFfJ6sstPWY3KeCmc+8mOh6gPO
WANSNdNkw2H3o6vP51Zr6ThvfCr5G4svMN6QtLPa9b47nB3R72t5er5BhPtWDpf6
nTJ3zODQQ09+quKrZo1nUTL0KmS75nsqVrV41LYSJIdzME3KFeMkX9AEfcpN5yqC
oQNbZQirt8BD8QOliGEv37SssAaGB2J9OmMRiR3uzOBAoC6I40d1hnJ2fx9Ed/rF
EUm2RSYGb3ZcUej4sdmkeNLQIwG32qBaERe2mrdssuVHn3wcevKHHnU5IFY2y1N3
QKVBPpdDCOb4IuJdwlIZIAnzufjTCP6+vuB1avimO6Qzm3W+AUEKTCBhs5rJ27qz
VIW4y/Iv1T43XaoD+BvbWgpF2K5inK2fi/cr1q1eisozc6be8m54q/XDcdtGiQsR
yAAiIZqfFz3C5GjJPX49kYLW0GO8o0hCeoh+uZIAH1TWktXSbMtNcfyS5EqjujwV
X7XnA9NjWr337NUprgtBAdviPFAENq8tk8+HnldpjiLlcH6ToTQS39fbq6zbHSC3
RTgbFJYej1D16fV9LQrebgzsD3cZkfFJrvhChZKLS6On1JshJU8uIhayqE6GFv/Q
5K3fQqktPb6T1qB/+fAbSufwpIjBtiSHVzupWkX8hqXQWk4VlJ38hHIQaZTHMNMh
WwqZ2Lu4X/pulnJT+8Mj0nHxdHWrsG4upqk/DefMIFJsU5wwc7Ys6hhP80w5YbrV
YQS7WwLFPw33v+x5NAdu2vwS14JS5woqBFetOKipmDqStYurH+cISqrxsOszd+No
afkmJem3p67Lz7mRLzFrCFQ76wimrT3IfdLB8c40RKwa1E3TGscMbeRxpSsmcz+5
YmopQcZtDg2R2PMJDDbkrgY/J0yQ9jrPwLKIS3W73vyQPUai7zKuL4R1VvBaA+cp
0+77BcJ2r0CV9r2AZ4g3tI00HpQeJKkJPAm0sY+1omjFtSU+ixNKaNd8qx+Mcjsh
ZsSyIznEHJsoKq2eSlTloLRKIIxfOkQ6l3OZVKI4fMlFkrusVWruNDyYbJVdbXu8
Qv7G4cJuTXVRbURThh3i81UiYDB0mg3iqEc1a2nf5M1nvXnEp3AWe7FTeS8DptEl
rF7vmjAcaX1uFaQnCIt6OPsoBU4aChlu1iPer14nuTVpffDB0QLlN8oV1mdETWTo
BRMySeq1elRubQtkcbA8HppieJvLNfIfHDoZ1EJ6aSxZXWxiOpwUtp/UvbZrCmqy
UOEa8gx8caPtfOqxZ9ONK0iFOdKzRMAW6LQCsfcw1Y3fInGw6tnhedOTMnG3U/bT
pkzyee1n1epsBwR4zqEvjgaVt9JPNYoGkb94+a37XhNmpLsr/fVr6q4luovQs/3j
1Tc/abffGWICAqCX2xgA75oxeaDWPwR/vjPnl2YNtCPj/7BZS413UlSYwQwabmRr
/PDwMZDkGNcVDjjKKYoBKRcs5i0LHuhP6igIJYyOSqFsoNgCJhL0WF8IHcHPV28K
7hBFtqtVTlBoZS7MDG6viOVoPumqW+3zzFr11IzxnsdUHUD20heyzV4VzJs5UxV9
d6tV8yFaf8cpODYKGJIqWMuCkRGkyJkg+PhlI/fr1+9Eu8pPdmm9Deo/UTfLktpN
3nhFP2YTIIYGwAtNsHJ5kmKtgL9SKO/EYbyB7DuOo2AMZGDEzIR7U/h4qaPE/CR3
laq+NzGBdDkTV20Ip4E5Laxedj6JZCErDDJTM5Hki3GWO4xho6JYEmDllHxs7CxF
EkCP/lp7YI000zyYUQgdZzf4EBwA+6qDo8EWKfSc40UawDnHeDkEMlhMLwd1KtFk
Zb3H6NtBucK5HgPVq3aphZfOksPHFYgR9FjeJVbxQmAkahavX0TvFOHv7KhNrr44
b575TOCpcMXd43qhdEC6PZzGF5am9tl8u5CuERNwQqye/Ki8KU4JUGEBzbuyUCiz
BwQcQgEq5lOOCALNn8d0LCKSIYRub5vbgaWb0VKts12k+1r1NQdynL7u371Q5szB
eubzRAyDyVBoJSc3R0JwYAARKWHY4OoU5WaphcNksLedOiW9BesgYF1Jbv0VnH/w
i/oALh/VKFoDeH+viQUvbFYyGBzPVDP0Fw7aAI8ADtkaMZgeK26AwBMIYstnruAe
WxooDPA9TQ0viqJL7CIZXa/XvhEiaIZYLkjyPVZYPUGMNLAleUONk/XZ37wV/GEU
jH0GPLMPLT04tc4DfG8ma4h5IMDfWxQFIh6CVhTchBeyjI9nGgDPxzAN5uhnag0Y
93H9ACnty2oNrQmp0vLAGgHRW4QXPrBVgh5s3scE1ncfBeMNX34U5lvk1/yTKHjq
sC4CfLLs6BCdAsFRKDG85x9I32FT+uVnCshyHz+xx62D1fL7lgHzAcgMfQXm4Y+a
CD6m+2AaUOU9U8qJDyvS1v9F0BkjBQar5dOCeA0mD1J1G9YC3j6AOkC7LRaWtwcW
YkRYFRbvQJA/SpUYDJXILPrxW/A8oaQopLd4teGi0TbLENBBmbqJ2JhdOEtBamEL
esq6k3ri9BOJ+onKklirrEYoTD7nvtl6E+9zVMkKnznCsaImh9N0KOtE6miUJryH
mNbd5sRH6m7BWcS39qzB1mS0ZCmGrEaeCqv33mp/sEB64NxAOY++54vcarev507U
BO+F70XwOZKwq5ksCk4d0swXmSgeSGxOrIiCC7sGe+WP2sYs5/NOxv5xIIpLh6Ye
xfuIab4GMXxS6Vh0sUBiLHliitcVPopipo+1SLlJG4lie58aiNhiq/E+lykmTgdq
kyDHPJN9RU6KLiOOL8Q/I80hXsvrwusikC3/4J3luGp+Yl2qukyjoIe4B51ILFPC
UcJSb1FsQbRZ3FaCG4nMq6kEpwRt2nQybSIv8eucyxpwuVbeVgWfrFLlTOGFijbu
ADGhpDdxei/1kvSC9fwWWTrlSBpifGKqH8rk8W6UjpJkE+Hyj2W7jNZUSFU8/Wj4
kf6RCNvbi7HYjc5jwvXGYzhDEkONFfIV/BXclfI+eeg2ep0zJnmc7LDYsPqwyCPm
1drhpeFPrCUmz28aKOLOKS0p3eMexxnFgcVF5ksqWU2gT6TmW+TLjNObkprqms6Y
XkzQFoQP5w47pQ2najPfLF8GbZbWBbvWfDP92r7JvRmLm4TbhIuDq4SbwNzFgpNk
mdSbtJK0xtxd8UIdoRJSfUV9rfI5fdzr3QFFI5LyUI7MouKdXJoRnrdzBdxF+u/K
VY2zpMuH0LRiaDXY+Ko1qxWc+GUk6FTptEvk9jJ55NKL0t82izRrePW1fAB+1Anl
S259lxmS2aybppu1oP8kP7pghDJLPYuzi12/yibkgGdJg7Q0OFUsRiy8V0phenxe
UaduuGIY0Wz1BSlzAUt995vSWTW1QuHJDI52rh73LJfkcyoE7lDV0FTMOUxt6h1q
BZotakI1CjUoVYuKzdJv7R87ksy09D26A02X9MuHcuZWK4vyaD47Nu94cCZplc5h
1kvXD58gnTy+IL1ggOEOcg5qRDqdtnckr/f3mEDdWl+oGToIW4IhcyN7PyaW+zlV
bYhi6MFQFgIi1j7WOA227YjNQg2+bTStAW2YtrN15rjSp7gl9a1vA1JT4WuOHRYd
c9PcM1c1F1TIEsjRIqHdr3Jj13CHEZ6/TChRiVYpqY451dsz3cvlecoTzBPOg9bk
2FTgQXemewV+5fht7mhqf+3b1IUMJDtkIdw6/FtIYUhlGB4ERriHUA6Q7a1grfW+
hHSj2sSa45jg/JcCjgFccCyIWhjf7LBpqZkLSbddapScPZ2dIGn0hAQFOupFI3tG
e0RCwzElMJ2Ee0U6hSZEpITchBKEJBJUqdXKl4XD1MOAOdyYhHgYbsSOtnmno3MS
QUvbi/BLu7RMmvHl2x9tK1fy+oeLo7Rb1WwoCfAIH31GuQlGa8tbkSw+1q51WoGc
iq0PuohZ66JaCz/QOjO8jIZM8C/zHxFM6NAK1hcrFsMQWwKX4av84lCmfeiznPcq
6lUWBVPeSN6giX/FWcUYP4luSCmVFhM3WSNdO3MWvUBdn8nErhLaG96RaElyOzWj
+sSIa8mvomHEySR+agjlpmXzxiKG6X1yA6irx8tJy5b9j3qPei88WYxYnByMmxyv
Ay9bWXbNkIoCJos1P9VKO2m11i18bdqKtABaiM7s9wv3hxvifbYMmR+Xy5ArbdJ5
Ub632sVfyy+30EgzpIFk3mmOYb4zZ1ReZPop4fHzka96/YshizIkszFbn9U8VM7n
Bk78dxqzT7IvnL44wjrNzm3UHam+1lN7PvOh+ItW0crA4ZvD6nqV7SZlXQ0bHWST
SIPICsZ3ZY3iJaYiE7mbbzd9cCOTVhs33ap3Uj92f5pq/mzhNQYWDtEJw0OAjt/g
1XMqa1bEZ9GpO7tQ2D689WazrtnYS9tLcEf0IHpYJEAku7st0mGCc3yK7R3bK9a2
8Jiu90s23VZXX74KuKEVbMgyZdWeQbITcRwsdp8R7qUhcs24hHjkb5BdpZ9UfVAP
Uc+cnJ0MrnrLauIm6fZ5w3ss9dHQI5pnyTfux2Enr5PK+4wlhqOHMFKSOdKdPA/5
uwIOQoOxgp6q2PPUVSyPphaXFs/3+ySUPD+otc371HhxqZRQYFzMocXpkerRuBN4
FT5JUJ8Wr73tabJRuWfRuGFdfhW/VBTRBOWx9k3rgm7+pM5jJeImFQ8iFPrbLm2T
283zWe4Nj/mrEZg85OfPBlzZr15c6W8vvSGDl6FMy39WdDVxNmWU13i8nTGlM1z+
0jgysEaA7ibuvESmHWo4b5hKuEJ4U6RIZDjsPGzO9f1x535/WMLYUkAzxXXVadxI
Qbqn00WjsV5vx77ZyNbrZ+Lz75o4vk2eWKwZrC+POZns5eSGzBc0PTvxucq80D/u
jt7YljmTiUsPf+bkDnd56ExqYbT6+dT/6OKvfdq7buhdhJWB8SfxZ3f1D33a78Mc
/+jTgnbT/kuf9sfQhDQQ9Na/P/dpRWx1Xf59pzZbBUY1dgqX50a0TXxaQXi6hzFj
G+c1mAEyn6LeQ1FsImhf7xryTvhJGiR8DJoQ+Qp1VHLa8cUMS9mtGlkJqGzMgppS
12G4jA8ntac8w4M3+Nen7sbuW9yfvQC8Wj1xomU2AN4Idm3ch/3Saa9T2t7OQcDz
Yr0DF8noW1kRmx4ZQbWGR1kLgVrnPjgtQ9ARtW0H22Gx2W4+IXfnI0Aeegqlgfos
MgECsPoAUBRJFr0KkfECbGUV4ZAENoi/MA6DEA9gQwmAp8wyy8RO9IftAM972Y0Y
bRuaSDSbgk87NjPyGodmUArL8MZv4sXIzVF/bzxR/cgwJGtcQ2GN9Zmj/0nCQa0P
bL2Ae2L3gxC8zkgEweBolAsI72Sxw9xufnzoAy41ZXA8PbeXW2PZrXAoF/zuGuQI
Qs64AH/p9/Q8cHr6L9s7jh5nAU/8VXv6EUR9pqEXcTO9/Q4h9YU10VfsFokCv73M
HZ1VZf6MCRhNpoNFxI2O3VCrXeiBZiK/oS0BIvWusGIhQESlymLNxPU+CA2chl/E
8t1GYSbcFWCIWhbJ4tZNf0g+FCHoekVU/HC59yrAQ1yliZ5gZQAHkK/WxExQFFAl
tzQm1Ir/0o+IFl1cIBr/mwQ3UW/8EWKX/zdpylChJgFCk1ZwG/AQosVO+WJmckg9
bCp1KtGOGl6AbSvXWQJMRwYMPR8Big84Rx9AMwoCD01dB1kDNoUkUAreeNmHmnzY
u+Z0iX0zC+NFOGTEsq89OxNeMV4sIxhhMaFa0ElPwIOvH5o8Dj1csr7hZzYBlkp8
ECMQWgH4WPzMEPb9JAEfmvCnkb3lcfD7vZ0bMI17nhij0FQ7dEAzR1QcR5r2BlCd
2Wo92YpKeFIFxZvcmYEdQfRpOS22jjg0BT4ZC4fvWxR1LStFihwk/rKtVa255BbZ
cLTVFWHlUFBVxKmne0OXnjtuFxXhbsoDbvTILjJk9SOkj6ksdd8UmFdwp7B7zIlj
8pUYUjgqbUOj9wbkNzRR9/o2W2+iKmVmcMd26Yms5JZciIzhb6wavOvIpyhUKJDJ
2cDQmrwy7eW/AeskamHSOQl3ggm6YdDdOvBRL6l8eSIYdPzVuGohVx7j8ZDTeVUf
KQwJn5z3I2ETTYWy98fv+WLHQ+D1FfKmTaG8S0c4iobJovHjEpq19g7DSa9HpVmS
5nUTKyDQcSzicgCj35pIGu6v7MmaE2PNnpc1oRPDKmGIEl0dj0dEIE4XliOA7H+i
Lewr7zZJNAkwQy5I+5ry9csY4iTNpFWh9CQt+6G/qgw+SQTaoCDCCFhi6RR/CmnS
yru0FwHD1YT/H2tfAdXXjr1bvDgUdyjF3d3d3d3d3Yu7u7u7OxR3/+EupbgXl1d6
587ceTPz5v/eemuvA0lOkpPsZLHIt7+dvShleD/MljZs28+yQZofG/2Qn4E59WKH
O7rLhErF6EOpkJpP4sR5J+s5xABudOJTb+opTKIcEHsyLIPTl7Hdn0NniUENwwxi
kNI7lLoNH8vWF4HYMx2YnwtjIYxvMDvkGpFhZwjBfh6iZ+C0rYAiEZRvIMn7CkkA
X3CVNoDz866am57ENZQ8zfS5tPfgwjDKFLMU0oB9aIfcZDggPvEDU+g3YNNg5EGU
TGe6CqJxSAdZImGlj/Sf0ommtnkyQGdTHD+z1dALARGPEGuJvslFlCWyeMpWYpZu
wBXgYf8kAhFzURwa9PjggheKVmb6ZvlyH0+Q4y5fWcqnaPGwYX9e4guQNafVlc+M
yWAPxASvhUhLpCENcIH/AGxPJCQvF0SbPRLUjA0UT7jPtsKQqSZ9cRx0JmkK92HK
YM+FQLLYnyQeNWJY9CbvA5Fr9izw40W5OVz3Atw0BcsWWHcq3wUcAtgOH30KyAtC
r6S4nqHEN3pZOPIezBpESzCOHlxZCMxverYwDX5zWxC2kJpgmVvUz1k3fiS6CB2g
fehBM7TsRaGHBsQpRMbBbAZnKTSoAUK6tar0SUFGuvqSQYm62XqJS+yWFE3Q5X1d
A2m1c0tgJ5jOEMc9j7U8Nc2svuVb6i2I1oEyPet2zLhRQ7v1lzCe3NoRydvlFxOu
sNrRLDvFlxKuJBuRPD3BH3lJkdgDyLZ5W5CABJFj+QuQ5PXp5PgUEZkEQSqATvth
89LR8TdiFOXjDePgaMNzDYFHCH/Eh48k7inb4y2LZhHZxHDt4T9k8Rejy5+QZiHD
GRET+dd9lZcuzQPIR8lP9kCtS7iJFco76Xqv6W7ElaYCAgGJgFOAP0ABYAEIBhBg
RhbJ1Oc/TOeZaqpzV2Y0BSrLcIi1Sx8XdirLKtPK2Sp/VBaVQ6BIIFckO1FhzbXV
2o7trclLyyvMK9ZP+KxTK2rXuIM7gDpAEdYZ1id+JL4gzi1+KZ4qPpbATMFEmqnQ
Vnyjqaa2LLkswCasVtCh6FZ/RfD9epRr1EaRUdFSCVhRXsmQvFzxtixDvjX/KkO6
WGPm5ZDsxvOR3B3nBeYF6IVJIH57eIv2PoIowlyYcJd9t7Qsr6yQXMMpyrzWPPEI
cZ6iDMQ8zFzZHMhcs3HAfN58wrwZEARgms8E5AMcACpl5yrdORvFfHM1sx9ntywS
zE4WWPMvZeOnGRdhpvfMvItaRa4zjKtRlcbUw/MTS5VKf0YuGP36Nw321GwldCVw
ZX5lqLHd6SMOBU6UdNOkeWYfuxa7jVOk43Ib8DpKG2zbopPOodTs9SLSgdIBDuAY
4FE+BYCfnZrVKfeRfOsCMtO1QDCo+aYb3MPm7yumHt9BfEmsJMnOeUgisDa9QLtg
m7tt3QfXR0BokI9AGDqDms8gDDLIPvg6mDqIFSGDfpdumnafFiLJnJLB6DYOMK5L
XR6fGK8f51MQmJNVSD2knhsr6jNeMIY0LjSGmDhLp0htTy9Ot6G1YcBroK1N0ZPT
t/u2QyIhJOEikfudeMx5TEV5QVlMeawySu2n2rGaQ0V4JbzqZn3u6v3yeHNpbStb
Kvuyl/3C3ml89cpOE3UT/6r5KoVzS2Z55rB1+zqTR1hncOdS1+Brkn8YyGrut+2v
AtH5UQYBBqW7dEPFCpRFBZJqHIVeox5J0BRY3utn7GasgWyJ7I2sL9uWx+MOVc5d
bIncTK5HcaVSCtlS9enEKU0GK1ZoUskY1GNaK5qvjk4OiW3MLbftai2FrVYO7d+r
vuOeds2+dEAMGLQNfYpWjmbJqsp6yArm8rmzvxi9Wjmf/2F1SnWxsfsyPTQefFw/
VryafJi+/5Ro05xdirdYPXhu4uPg0+VT+UZ4a+hM3J714shu0eb4OHNYDcwJggqW
AfUFWACYApgGwgyUCNQK1h3BEjUD0RPflbafyFBvuFRW3NT1YGVaA5sQLlphCAPG
AVoD2ZlZk4iT2tPifgqxCXE2JAnjPqIG49hkLbwhAlkENxxYLqPkp9xdfmX+DxEf
PIHI0KjSqAemBbKmL01c0gzW1muvLcmXc7sqQ5tSNWIxRA1EZcRFxAtEXeJQkurJ
AC6H0XEhBhoirC/hcenypmShZI1kAvV+xlYZ8+lHcepZK0yr7s7bJ9AOMPuGU2zc
Kk7ULmexjOLq8iuvDS5rpNawLqa4JhtNbv4dHzaIN5C6eHxAunW2CFVJXBPO4ruo
fx3ESAy8hLunZVSJsBHAQprCsoyCjM/GPRNREhtZjgWc5W97sAMzGjKMa4NYJTyZ
F1mbae/S+qXlqQ+zztl8dp/5zFoamOHH0jMXE6rB3npOYpaHuZN/It+jKqJ1aMe0
bInmuue21OQPN5kKzeTvbO1Uo8VBu0GviktKJCXeUOrTrDSia3Da2K1+uiYyknBP
DqJcb5Y0U1uow5NQKzwW1/FMulGTSJVbnq0Lzg729M7JkKOm6m5cs3iYpBmmEdTR
1KZzGkhCOae4R0GjUEtUSjxXvlLWfp49HJvQ8VZN7Dq6Ml+c51iQXQxZdKz8qdFu
k/nYtuMEvzilutni25qr3xce6cCiXZKm3OgQP0u8XHQ2gZie3qRqqVb/fV15e2Hy
6HAeohnDWqP2dN759faY49mF8YRxRa31+lQlr9r6HGp5XtVASaExva1d967a49Nd
g8/pq5PWr78WRqfZHgMe7XcDZxwaP5RVmjdt345A7oGWfV8fAY/lm6Dec4Ct6Zrj
nMmeUYGtmJPpXZu5rlN2bO+W05Cn2KBzyu5VZ8VrUyHCBVUAq6uka0U7WeuhuoOq
g0a4ytjMOU735qr5irqX5tP9EZI4yai0J6uap/1Bwh7g22HEHPzqftM6F8P1+EQ9
nQlNNjSPy2vwFt5kQ/2qTNYd26Z7zzX/tdBd+BB1q7b5ie0h62P+WLQITbu2dceO
c+Fh2dB8ksXGorTmXbv3o/BWJJ61vbX2UcRJx0LitNOT8lHl2erzqpdL3TnnU+lW
8Xa7xDZR107XyksZRBC8+SvTgw5Eu1Z79B3oreMz9t31enBHsIz3yNN3LZvl6hud
ctxUzrJjhzOLU/iz7kfXhd0NkjiSPpDv3aVvTaelE3Pn3ndvnQa2+7rnDIf18D4V
nlVvnufhZjQrQXnBuB3jbmzPZTuNr8deNmubDd1S7k+mrj0cK+0TPtKv9d+97p88
8Oy5Pe9ZqLQusP/NOe5PezkDAzPLn4V/WlP/eo77fW77yznuX63F73Z2h/9kOX83
hjtZO74f8CTMDB3wNfD/OPP9NYT975BH/9yngJ6jnqWNyZ+d/80U/mesMho6asa/
WoH/erT8o/27NRyfRsFJ3/F3VtHeyeiPF++T+uOllDSfoLAABZ+9mZ4lFb+NpaGU
4h/t3gPZ25vZOtrYQ9H/ze4uZP3r3PketZ5GSs9A3sZKz/ofJcJm9g6OAqZ69u+x
5mkk9f6WoXsPe/87cP3vSbOwQr2r5f+L/JeeWH6v7b+T36GqfgnzL439Tv/u6dfY
/l7j/c2fPxlY2X7XYmBg+Ofl+lfz/z+r7Y+8tJ6V0X/SsqWeicNvdb1X5P+1aaA0
qJjpWfGpGFiY8enfY2TR0dLR/do8Yr+2gZkBn7WJpdGvj9LwORi8kznYaJneQYI/
MlT0dPTvG8ZW1MjMxNQRiuVd8QqORlbK+HSMTO9Yg97vhfo1CxrVP+rgM9Gx/VFH
FJ+O/h17cDb5vVT4jCxs72vs+jsH9Xskv8cobGZpRI//Ho3tN33i76r4K7nhT1Dj
b8ySP7J07x/4Nan/imM0ukO6Kgot3Ja2NTcXNDuydxodnjm2Ic2GQqpBCtojxZEK
f6komoHBwYfa5Y/Z6mX9ShrGR3S2Oo7A4ij4vcg/5WOEHI9JxgCQE+rPdIzrqS1W
9v3YVJkZuYPXjTYc2R/XD28/3rJ/dGcqFCddK2eyKzlZK63f6NTmJo83BH6RV9Ze
mBNZQSIF9jD7nvji68jeHjFcc5LXFU4jUey1GuqYrOl5yIRWOMeXOqxe19ZsosQu
RfLtWJmQMNOYaUuonOa4mz3z1gdY2+1wJVHhu283wWl7xY+j0ttDeFEI6vPWChYq
nVrMjgKb08fXUsab3MEuCvfiPTU0uQUs9dTZMlNO7y5+GDqGl3hMM5LD0PhMclPI
2Ffo10+HMajf2bscjiV8BcasIrMxO4VhHy90MK+F9oxaz6NouljtZqUHsYfTGN3k
PmToOV9xphkU03Td6+drjSGCFeNdX+xQTaAekq1A8/d9BMkhQICh4mLSr1Eky9+C
Kx5EqjKdVzXXdCenq1cfo+kuNx/jM4OnKjY3PBejRFz2EE5QJugyKXBXTlORXHTt
TaFmZi1/nuD+Rs6bYalQ+7DFwdfOS/P1RtYUvhNa3PfLIeThtmA7HgpPUJjlhPQh
naMcnyt6ArDY9CvdzXe6R1dykSDl6IiU8bwHEUbFqpuPsswBztOo09rTejFRC5/X
wH510Y8rvNzXXxhcGPzJubuTTeAR0Qrc7hCojk7YG+C9GaJVP/FC2HRCXrhMvS6V
iS9dxhg9yIc9vwG3dNpPsBFLml2VWmPwpU/dKPgZjrQTJOyEN17gY2qSMgLSFYdw
nRb/wzFSEyXsXaegkRQ7vf6dolMvlApSvHvhGJmgtxmSK9C9+IXnBcoseZ2pOzkh
s8c8asMi6CUxWXBRbouavRyKa/levqaUpUBvmrWJQF5BAxRXFqEbI2K6YS5mCCaR
QN4oHit+qFu56KqIZCp/9ymkh/Q8gVm6IT5JQRPv6GkzThw97SCGugxqdAqlkv+E
sRldWyu68aWACDhFuGwstUxO3j5lqdQoIdoodewVGUSHFvn0/e6sACDqBl7ks9vr
JchsJuYRnBxZWnZmlnq9COVC2aVxPCNWYZkjFvgWc+VlT+xwBLl5lCiRIuROzaVx
PzOhcTI4Ata3EljdAnBaeRBZ8w/10QXpcvYMhuQFkQASLSH/HK2QcLPE+K98A/rD
YsiJipFi2iMgfUvw3xJgWrsQ45VM98VY65jopkKW1ecdRdVlrvmwtc7w7DzKFnBj
xBurEiJd7cFyaHwP3UXti4PBmVr7Y7DjrnQ/6qV4luLH7qqkv4iGh56QDPr0RH8k
vGR5sBmwve4ThX4dI3tdQX5zSisefIi9yduy+cg9kzG0KWA09oBnhqafgbdFo0BE
7hocHTbzw+aazhzYB/pQactga35risSv+lHk4eAjuqMPrZ5d6ORVMtJMWGkIDyeK
3Q9pIeyqsn1an9BuUbeSnbstoS2aKztyUB+gNRDuyadDpQsTN6oJ4E2WgTd/PGSF
DJ6huzmYi9gApZIcYhi/U6kDMA9ivkNFk8A3fJ+gcwI8wWxpQU9ST/0v8nvNOLxe
ETyDT0gP3iIO4D4hTrUy+IyCNpDScK+2edqK9Cms6BfRl3zcJa5HiTXyVSdJ5H2J
3xPbC3lZZXFL4E/gGFcfrGzx21kXaDZ9a7KAseshCr6CP0xAtmpbcYdyh3rbrfjZ
ioYPIN6a0fGbLurn3aSgWuysmnKH5EdJ5UzkUOUciwq3IN5wTTfmnFuwvYRYfdAC
s5mFEMRD8OK9MQvhxn/8egCSJyMQkvT09WAOwQ5/h7ffN8QihPWPJFPANAucoKaA
I/AMpCAJQiZmHlKIND677wEAIZP3V2EpATL+b4HN/fBbTD+C/RIhAUVgOUhBIoRE
zLxPIeL45L4lAIRE3l+FpQTAvKBfP35AnEYAwv+dNA358J7E7IULwPnIgeAMqwfx
O9keVAPyK1lFQPw15YM+cAgkLB1QPygCEq+kaQgk/q/CLRVYCZE0HaC9j/giH9jy
+KI+2IPGEH7FnnnPAg/HllZBC4RAMsCdsNbsfouyWLLTHfLFgXDW7IsSsMdesoMt
B859F/OPKL9FSaCE95dg6n8MIcAP+oo+iyDACwNEB9ofE4QO/F4IS/exHx/BnxfG
PIQPH9wXHVRfVgAG+FdhTtB9Ny6mN84x/Y7WWHONGeamJJ6ZJ1Jn4eX5XM1gdeE6
5huu1fy9cNnivRLyDGuQ+u7LHktdQPfGwokfdAq8Opw69ArYCrQ7kOG0fjCiB1rC
TqN4riXDOMsJ/QlTh+70KZMkeosUj063RLfKm592swpP7g/ffU3rmWdSTehT0KgZ
4wA8/4tPfEsFA2musCuVvtmVA9VBi6Rq8b7REsvb8rf8ZKsao85JdcZIPOEjacXQ
slzBQKrJ+lHjt91gZdHIU0EmbVZvItY+n+V/4BlBzFmmfRK6IpymNWUxpSjBVQQj
hwjk85b1KkCuoS60LRv13xrIwSf9UEaSDP0kKJIkh7GL2uSxhwKdKsgxQPQNRxRZ
xS+SOOyHP1cyqfa2DXPtiyKls9CJGmUZ15YH0ms+qTf7RJb4PTz+T8FeHZCFTFJu
kBM/wUuLV2NoDX5vNV40mUshdNtY7ZQLmsAlvwAfTFVGOWzE2UJT0ohZsyU5PDAR
TQG0Qg0ooud6fK2UC5aPZoQo4b4m7uSLgDkC6tnZj8iPrhFOI5IjNzKP5zc+oF5v
cH367h046Ik9cMEiy/JEfT41zyII1rckaQwBnBvwfQqaKM9qb2cXE68QcmjQ53eb
5zx9PhoPJYjLzfzn6Y3En14rfeW6REZubS5VHp/Goh8Xn6Yu7+7RHtv7hmXuaW7w
kM3lI5wuuZ5eMktsqd0Rpe+noATQSpbOuger78NfYH39e7sYBRgjUzW9ZVW/ls1W
Jvd0Feo1ZF3QlOIZqYmXbqfoTdv65g7QjiHQI2NCwTyAF8/oNWBVCtfT9ZkyHkXW
xWKNHGBLSZHK2UnbHjXu+uGSEAvXoTY7IIp8jWFlsGcPBliW+rtQmuvhHN2LH6ki
ykbTQEXWRYCNKWqVBJZGwR2pruVNhjhHYMpDzz+aBpsfdORYpNSu6g8rPdzKCYe3
C6uJG1qNKeE4yIquWk/gEA52rFpHDgzvttWNzO2lZM5PbzxS8WmORTQLd7tz6kTv
l985Uh7JZ49Hlyp9jhuNdipZpILSXGIatFqbXWAfrPQbaBvc47a20CC9+t61gN4f
Za6fMqEcIleri8DQJMsb0pPd8JEuQk6dGph1z8+Pj7qPH1GKOk5vZs+QeC9oE6qh
EQ4CgZdY8iaJ+Fo5pYvYHwPE8tgWFKiAH2iBqEBVhTSHjFmqfPg8WJQNOIT25K4h
7FnSQrLyXvwLJ5G8h3qBsoWE+HG+EiGw4i4lG9Eupe+4StCzT/jPJsHl4RvYdG3r
Y9jGAQGrzpyWtt3ReVynsTBeXdc5cDkE2UJRz4HReb+7mzIs/s7KoyJZC13XtqCn
5p1kocsb2WPazrWmFot7o8JmJjqt1A3UI7PISEYmZyaf/Mp0meb5+XsqK6aw0TZB
DSnMs80Vc9QBqbxK4xnletNyMbPZFXMNwn0vk8WaWHV9B9oqv+iLcZjxbVdr2oWd
ursJVCR3S+XperI7t9QlpASMyNJ92XBzoNC8q/0rY7kAJ+KwiuEmKRQ35gmofe6p
rBTyOkIOCgB/MbgfaJdApdZ0Ljga1fEnBSElXT8brPqfOzNhXICmIhQf0TsLQHfX
m2KkX3zMc7bMWzMXFrOl6ma0roAjl1yweluJQKXGBykYcEYUm0iC8wgFt7iC77Dp
klb5pXbIwrmgx2gToaoJQnp8RP43hlsCjwQgaMUhr4g63vMrAkssluDbrOPV4lvk
fMhaTPLog2aQn1EazaJ2y0RJPHvIG2jl4Uu2thlV6kYRMWDgk+AX4AODR4OPfpKu
d2Olvq7vKKWVLFHJ+Ti+kBngr+D51+YmmZ7nCmp3LVzEhAjm1x64Fy0fJzyraI6J
XFH05UWv1GuXay9p1NPyIwbOCJENEq4/gsd+kmHP09MzgQ3QFC1UUE/62OUe06s0
c51QPLObQCJiO5gHmFFI0IxnJx8F/YHXG78LLjYNiM8pPrirCAAzDfDis37McFt2
TAtffsCYRPI4/LIeufui3xbMVvKxeIaIMXkkJnSW6qQHkFgKfyDZ5o8rzTXUVJQl
+CD9SOYFB/sawGLMlQnxQASQwBM9l6P8+QHjkHi0QK0hprUk2Dt4s3h6V7ot3Lu3
SsorSjmzAeUnkzwDU7G2ZGaOfJsQLqDTyD3JuhhEMls9Vd0fR54A9sL0yKXUhYyf
zj0gy09ajpk6W4qvLaBpxmuc4gW5tv1QTpye4Txp/0CbV8LBjExLWmXmA5dYty7c
QqmHhAvlz07AU0rgsiJw5sI0REXSxG70yD7gBMDhCBQ5U35QfR85hjYcfUwtylzo
neIOWXz+QxWcY1gboHRozeGmdZQLYGiZC592VN3jbKj3qypGO/xxA/9IspmxImky
97nhGWrMBAjVd8BnqNMTafNLp5hJTvP6tDPI6efETzecODkCNRM+s6CdQxmUyZl9
yjWryzytqdU7wYUQhV6zNobEb+i3cHLozEfFQ6Y8L2Ha+X2SwY8UaiRP1BpjZ0Y8
hkia3/EupwzzPTufCz3l0cSkv3RLZiY/IptY42VKYJkxWD59jJzmfmR6QW2OexMa
Ss2c0C1fFpA0QjohtN4J9OQ+373bunlucMxybL/J06RoHk4erh45P7AGnNLeoMeR
OJOcS3JnenL91DxyGsehOIreAjaB1QpWu0Tv5LXJu20+jL4xofORfaNsivCCqKww
WV3WOjG7hfLI9ArR1h/y1SHIHtCYOVL3BjtpSNwcOec/Dh6QgqAmex1+m+RJdJTP
VSSpjMeNUzRTZP/8otQ0hvgA49bGqaNNXExLr9RW7xjuKHNwe6A9izPHcqRy+HTj
w2DJtKb7PD8yG+8jLm/vJC8VpXuGSRfP3PuJ57MmcC8qxAFazUF17iWol5/cRS0+
RdAGbEWmU43biaczwbGRxrLUCZwznkcM13gWH/w0hPXXM7mNcbRL3I0xmy2WSw27
5NponimfSZ9g6EQx07MkfnnFNOqJxCQxNNHkfPiXltF2oKROLXd5dspOsk6aF6m0
/pLW78Bu/h1yXTremhsk3VUcKi4Y3vDH2tORx9qLmdOZ0w6dMtnF1dM+Km8Br1Pg
nbmT02YtyxdYfT4YT6q4FIH7QOMvc/B3+rCoFyStChvjxLGZ0QrBsFzR+tioekrP
aExiYhHhSgkCzdhnifVgmtXD5Mx+Lycf5utUTOuzJJbQR5ESdH22kK7GniUfqcIZ
qp9bHFvP0DhFPbYiwR/4vL82TnNvDCdf4Yn2b/RpXHKN35UfUjtDash4LH1JH+ma
Olo2foR1EQtfggWkuKeMjffv1xmAwh6wu6F4/XBE62LqxbTleOO7EqkT6kJ9NUs4
6wnhFjqvw5tDk0x+/Lgh5cdy5JvcCnbthQVZvRjp1IRxPAMNb1/6Sntq4L6Wu3hs
MoZ1iP4Szj3NFY0xD2zz6G0f+Uz4QFP6qMimjK6MweXr1Jw22RvmBl+/hzD72YlA
2R3cE5IarzQ+afvq5OnCvbkYAICXXyyuEqss1AF+AqMw0KkhqAiRw8e0O/9Jrjyy
agmxsK22udL5ZmBsjxI5Fzze11sBdawn71JoLXtXYJ19RtK2eDOnd4p1wDd+wGPA
bJIDQXHo9BjDbSAcEZk8WgL+OPn1TMuRLFos2BTuWg5vwRLy2XVMUWYhP6myZgO+
JgtezwrbP7slxtvviWFy7WBGvMFGkAun5tpeXaadzm+xHnGvwm+RurA7f1OZGWQR
xKggp8hjq3Ewdw7voLrGWXyuHMY7N5FKSCt75qEBigogR4I1+PGkGNx1QflQpcYF
sV4BmsIwGhhtCKpx56qd7w5tsJTSTdscXIcQp5eDOPCZoKPT/lCyCU59aTo6PqFv
X8HKnsDRNV6sbnRjuqEl+67IOq5KXFu8uwDPQBL5QVyAIna2Q9Uszct4tyIVluHI
wqKsvEhFOUNOG5UqU1keGxItEMofyIfPW7tq6tiu3T5jOYqyfcKczsQ4JQK8UzqJ
Nb+uSdaDM0d4pwwbMtPLuVU02D1m5roxogWTV/mJxQjw9dvPnAOsOKgvNI8sYkRU
pRlJhre8hExJyWAr/EA/GxdkdROoNL7OBbhbWJCiypI03nNScZcMUIVA+H8AXeEs
1wAhD4dYAdxSqMA3DGiMjS3ZGg9mTGdsRFzRY04OCzIi0c3jHGEZny1Lhtu6rI7r
SQtDt5U88ldalbGAkpbF9lpxlQMmwbSsKlt7dCs6JI0clIOUS744d8tJBeybTpQ8
spXxWRDXgLdrJDqDBo0NQlhjNM6FuQI6yBvKfvRSKx3x4ViZKyOfNpWdRYpw6RDJ
sd2OsHh1Mqpgml5XQH7c9vVNBz6696uq1nPwzwtShXH6MNZ3eunrzOgFLVwmgF2q
2EW1UFhnZfopOLBmodzxbZYk1fa5HWge2RyyEvfeGltgF0vWbJupJ2CqOKKQeHgR
FV11DQWqTKo1V1XGYqMmHhxVm2FHCXjDJikhGXa1fjYIp2ml6LPx2CJhJ617m2S4
2c7nhdqLBqPUaTpGtCc7phr6D1Jt/AdzMIg3kzm+iQy0H1z1YUidUIQNI83TkPBq
ppAfDj4rOOl5kNJekOmBBxDzPBpLTylGcVu+JQjmppAUF6eNuksPzJsqUlGhKPTT
QhhA4ZhYHK5c1VGIuGmVTEW1x7Jjg5YiNZ2GTlR8ffDno/vGIYyi7hvQZsSnwo6T
g9IKKU9uq71jJ+cHJJm8R4lIpCGdmBE0JJAy8tTfCfa9ZHD4kCd9PXG9yb1oVPMt
fWfD0W0oTxZCmsW3yfceUHGq+hyp2KaJjuwssKwoOZE1R/Tdfi8UfSqxQV5yFDo5
E5Uvb6xiVO/5MHBWFecTcWFSD/BpGZe3M3uEEai/gsS+j74w7GC1r7DCEKi4gU5P
kXvuZIT0YeqCeubPyBuWBgZ4UZzwbTvXoR0jEBCMTVKLYBosdFN4sBWIHRCu/FIq
Cn4gD1PdCJ5JPLwDC380cfgD06MHnFbzJyo6RyOm9FCzsVIj1v4mGnTlJWdsnSHb
AeSlrhaKHoxsJJvQgdFayCErBZBJBp58ju8/GVVeoanAbYQ3MkM24VZ8owNYCKrj
eEKfaIB5YWrv06qGsmCZdibiJ2fq3nggdsxPVnHFxhLEWJRCuAYABh/Q8K6llggN
pb/Py+FsJMhc0zoHLIq/xSyOvkn4+PeEyndw6sLKRQYcHyZ5ZRD9DJLbKDCMl5YW
T9CLiY/oEO6kHin0p+Qntlzi2gtdiWbJsuScehXb7YiPBAS0vID6HSb2VOgqowNZ
3x8I8mLy5B4cSEAN7/bGuRRtLKJsVxwUAhkF9ZjSYpxY5485Jl1Sxm97zsk/cd16
1J+NuU3/bHlhWzx32JjDWzRRHzeGSSXIsKI3AacMrhxnH3UhDRS3NrHmVDkaW48b
A2lNbBVo3W21p94FgnKl6NzVHoGuRdy8gc0iTThBVZ+sd6lu32lBLSwaKRoU5gAY
rR/X+atJN48paSmpqEB/P1XGJY8QDCNsdKmLGz/JXLRe2TEgSlzs/DmOZWNjv3+c
xXO5KMCQpOV8yTUlOoM0svfjfA3p2M12pGi3hmhC6gXWxH+ZlUGp1mnU3H8qpXjM
5WFyhIvDxvqe5/TcOPWo43TjmhDNjSZqDb21z6PYptmG8s6kS8Vhwr2TaKjwri3s
55y9/kb5faRn86vai8zPfTTzjabr57yyQzWjpM9E7sJSsfKqft/SdeqbDgQRacyn
hir95c0a5zNSp0g3s6r33yh0JqdoDOYL8BeDzMbNxGRHxsyhyFudQXF1pBDuMKdG
weuJ8iU1zXIkd0kXWL+M4ueSTo77HSLuMiqEEu2znNM7dKcWjo9XqGoxGW8+Yyoj
DbVsKI+gl2ehap4Zn7cte97Z36k3790qV5tJp/uso1wT86ixLHtldT65Iud/BcjR
WRHbTUwDlhw/ncSfHciJCAjdtR3UZE315FUOmxzrxx/2o6MUDmaPTVSraTaUhbiI
GKzzGrJhfinvrJWL2GmzPtIeCjs+KivXrMIeObSHoPMbcOcKqmsqqqrqguMoFy2R
nbpx9+ceCp0RVtaiOpYS2mT1tG0QGIUl4RlvwCqoxzv1vpmehTh3/b422YgTvuxy
xE1Zdm7O1Vy5kjXy5jkI4jJg7U3N5j7W5HB91Dl4e9t/a9TsvBcI4ga9Yky0aavo
FoZlQlUZBkD72bsXToflTrtq1VKJrjiKQ+dFSbiveqR+FPp93aRl86Z1BKBSU/h1
KsF8nMHBvOOHaOW+g7165126pLTdccHYTShBjTFmBTM6Wx/XhHlojRyzVO3ycHP9
V5Qlf2Ebb5V84z23+B/Lizg2GSxudZfVqjH3UsxS0tUF1ugm0sn6avk68bWDdrHH
n6fSOL1YbvUae9kTjFwUVVprtWvBa0BnleM84nSY4Wk8qB+Mrgr7lfe5DktM15fq
X4LCVdZv/KH1WQswa0duNwZOSR6zOO+uhnC9znK1DmwYHjUils8LOG+H0ZcVsilO
U2Hv0nFr1gx8+O9cB4HmgMZKpkwd6+of1B5vIx7AZFRvj++evJMuyx5cMGxSeVg8
jWv3lq/skSMco/Qnymq/d8Q4sIqMIjIAlKcL7MqxMjbLUqyURYqZrL8rR/uHerDY
WMOWO8fETMADTDts1dNExubW4ovtBoKM6EDjdzbzWKlcWHX3EdnmthH3qUcZZWOU
9kB/9C3ek0MloVVQLSnhoy35CQ/ol/v2FBs7Kap2PLmyEF9/KaprsXB0T/hkEi9C
VkPwTf4qhImkalZfimSgEI8tB/sLNr/YRzNsez8S6VBvPyZ8XFheUlvGkMkva36l
hEURy+p1bEsFWlcDUWGJ05VMNkq6ROWmAPK0ZnLaJGdE9HLT/s/tnzGtDNXm0xbz
z0jn9MBBtw5OFLWE5GWvfZcRKZH8Nya6dbPa4G+J37qsYB262EawH+PDGhqLjdRq
HX/OQmNhYWioXn4TmNp4FRkPNL0yGRHY3LRjbnfc3WdzsLUbs9sVPiEb97pUbjWP
kLyQlVLDkAornetvTlGcazkMOTSIn7QJS2dOD4rJjb8B77D/Mu4YGLXVQSTHoi3t
nrmBb2IrEDBS46sPhTo/rG2g4D4qUqzNrd+UfaK9SHq4BXdRzBZAkbd8sQ/jSHJN
vDmU2eNNTCLj6RaF/XCFE/Fy2qISotfUZpq8Q2fYXp+MoYJl5IlcTrewpBFZ2QR/
wt6ZgvCgBl4uZDM53v9pj3LnM5GsYj3aW4y/uCdubmJ5TYnxNMPetleWAe5rbbAb
PT2hMYWyea8+HTQkFr6AsTNM1txx1qz3Osr0JrcZWrXcff+BHZWAR3oekv6LdOWG
Lm25cESYdrb/BqjD1h6UaxS2RJdOQ46etQ9y5typa/2T74O39oXiecQk1iexbuyH
ni62cpv7LPRwnBGJ7x4zChzP0yCjGAx1U5P7UZilPbMxWvGr5BON4xPWEy8qVWal
3odmb45rF9WanmwAaPiEaYwAHnnN1FRWtzZ/YR08T5kFxvJ51NpVpuCEZRGN6TiW
brLTy8WJdEvBoRORQJm04O+5bvnEp4HQ0V+eZ4Qew7vOoks4sLgEFrdiP2q3q7YU
VHPOwhVVe++3G0SQyEQ4nWZEU7dbt5sOLGCpaHfgaJ1qJj4rXBleuV6d3hKR8MQM
Ct8+2+5dBrvofbXuHSzSPn5CEh/pZDeuqxNqC3fEcpQPzB9rW1n5EcMgyVy/Oe6S
pmC8YZhls78v551IP6H7zVVCM1uOn7i9dBZgEifVNRGlBde1Vrtcu2jXT8BxgqwX
Zzuciv0mThvAAWWjPIc+1vf6sT3KSQdrY3d9w01khNDYfO6LcDtQsSextvp9zvYg
RKT6ZSxhvrlwRBvdmplEC+xKjkktAV2vA7VZ5NAkz/G4GjTF3nBncsOCt7vwdfyI
T0504kW7801tQndBxHH9DYFBLccYTtuUXfb1xk67hBS4SXs8B5zqYAUPdBfa45p9
hyzPRF3/rEUrx7X20G6ggbGAgyiZeaSmZgu5ffwu8Y/IwEW01CNCq8fbcQfKa6vT
niR+AT05u4INTawKqgrYeVSMG4w2SoVpAzJmNFTUIBihQPFl9+v5SQv7qoymXEeP
SdhC+L01rbZqW53husBTx82d1u6boULz1A0cR7Ie2UiJkb47QzSPxQHN+UFdE1eT
lGAUGW+pJRJmvDCsrLz6CKWk2jB6ZWWEigYGDyZoc+p1Y/NZVkFQFUliCVi3fJVo
qPjsr6sAZ0wFCvIwt3vIJCXHuFksyELlqZSsVtWCGuolXM1x/TMly8gn1rPANc1b
MGg3saaBcQnPMbunde245UODrltLgbkR62cjtjXY4hIPnC5itCJvNnn5sErFNLQd
iTtRvlhRmYj7cPOGBhXLxgswTrRYCcqKqprOC+4xrcA3uft0fq+aactYo+yDoXpX
D7lG1+jIlrH0b0wi1YXQfUx+FA/cHZ22l1VbR1pR9VQn6H1KxTilrFWoYPSrYGKD
CW5f6r9f0aWGU7cgK56WOVOULFZunW4rmx9brOmTHCr3ziHkaKevVlutGN59yga2
Mb6uldYZHSpm75a2nGr4YYocpHoXutQf2uB614JVpK06k7LvaoaTZX3J/2m1KZui
SFIkvhKUz5bx54y3hP+ymTXCTEArEOqjLWs9n4fQNpJKxIKTSfCAxUeNesyTTdrD
Go++rMlKie4k+xqJ2AEq9CbqWPF9B82uq7rHGgYT66tSaObO6w2ObjIx76TGDot3
NkSvdoST19XlKomakON2XFxHGG8UQ7nB7ewTBNxGk8HjCWo3hWJMvMsMGw7LxmVQ
mNKezEvkZtUTwSRxNdkcMLJuboRZU+qCQwVdek+6AO5IooC1SFN8K87aCGfcSIwe
rUdAq9Uern25NRkcc5TXOWk8EptkyzjiKGIx2cn2eGpRWARUHlQTtjbwJ/FQkbAW
HAn7tIz2DI9M+bXWAbYDzh3OfUDs3BkMK0Vm3dxxu/sBAK5NoDI4OwWMh054EnAf
obrLabfTuzz4GqrSgopttmVX68Ea9sKr3AgbfUFHSZLwHWB5hCqMBJFeIWvlZMUa
boM9RTlJwT1Uv7PiwMJsmFbVHvWwNyxof7lgqn3GUTgPvVK0OQEn0/FgKv/cXXZb
EHZ4d7jUHWhcQLR21rRj/WDpea321UZO4iLyyFMqKhYEFTX6Hkr4etLC2iobyapL
X2qq8DuVBY0Wkw1d2CtW2CoE378hOv15pQQrEz3t3xlD/3pbyP+AMSQsLK4gLPY3
LssfzJR/xxn6w5n7f8gZYmb9j5whFnr6/8L0+T8LE+1fcv+hp3fuzz9xe/56ocZ/
4/b8J338ZvewvXNe/sHuYaJjwadioGfCp2NgYcNnY2P538g9VMz/1+ye9y/8F3IP
6z9xexjp/sHt+TUOBgaov3J7/rg25C+q+NNT/6/cnr/d3fInt4eJlZnxv1N7Mlmh
XRWU0t58zqSsZxukHnOqP9wFSUhYfVJXNzUrZbSKhwrglwgnBmMEE9cAO5weRRYB
ctJK+SqPdxxFDWeam5ezVvCt4CfQJOvxsYETDo+TorBx1xHt53tVgF3NyOtdkTL7
5tnJ3SkX29tTxvXbm9uaw1z9YRKzaMDpN1+LiaAF6uksQDPkepuxQzTyD9gAR18n
rVOsHU/5r/fzp8fNFeHXZhRALa04VpUWu5yeMi0N/qB2uCZIWRu1ucUsk8Vdgkt1
3rtpdF7qIJeQWOoeQ4PB8KHJ1tbr06jNU6xCrN0WBi5T6G/4eiKLRU10HjdABxCM
mWOns7Zb7Gj4cpyeYInTwOy6ur78qnDfylS5RtykqkFUn2bwmNd0q55XYioHIae7
DxdJlJ6xXkSPvzPknxLn26aqYzF5KPG9QF3nS+Qwb5eOmbw2jRuCYn0s03/eFpgQ
mqorHp4dgAsck9BEdDadpi9VHdDjM8rGlpSk2lDO7AXfIp2PV+QpHhVA7ClUtMkR
j+8F7/VQfPK9gMXE1JxV7chc6hn4aW4D4l8FZpcRgzw0GMZKTS53Cgfj7q70+k3X
TiiDJgXlR/GP2QtU56+ez5r+xn6BiuUl1vmjc1sQ4CRSoSwMReUTjxAOFQP78RXZ
lI+lWt37+t0UvoBSiZ8SYLduThhZxdx3Zrbp4DbTuong0EymC1vMz4o4Wv4kTK6K
/oGYFbNb8rDWgBzjaLQST+HvnIkylwoq5KwIgg2s05/zxnypEYOnQ4ouLC+7PqZp
GtUPpMpXqko2CrYJOyKglr5W6PoeFJhT2IYbfQzRFQQHHx4vUJOUomv57LqnMoMj
ls8R9w29p8y2R792JQSFdry8L1HeK4Acj3rpSxdvJVEkWMzSdo3rMkaPRd/OZn8I
UN+Oi35ALoXUcznrZ28KbgpvKupPOlSslHCx84R6dJ+FXetWdBD0grWM7ZJbIjKw
ED0Gfu5MxBWp2xDu0YdalMhJ8IUfxA8zUlLHNshVIZamI+UFJ5z5fdyBnCF61aS0
M5cKny8i6VfbIbYrMkdDxbncrgp7SqrOQ9qBwbRMYw4T0cwylKRP+ulFeoPz6RE8
oKuSX6dxmkXmgALlcf+jlxC/Tu60CdqjfWAXGX8bwbwu3ResT7CQ4P58Nluw4x+C
bkRPKsaqzhIcO4WE3LUDO4Q1UsSR8D/CwMKg+sYNuqU2l4J3jpYybWlRkW0yjiBK
mlrKOdrDkpdqXzAvGpI5nG6EIGgUJSx3hk3X9KLxdyzKyAeeRuAzPn1OqQw7ayIv
bewiSJs/aT+vLWN1vuPy5jG0rBotE8/Mltf+8YrHy4sEvnaLl12BJ5Z4xWyJkSd2
Bwu1Mw9cK9V/W2qZPWosJYd7xfyQUFx0n6ifGCJ16ZEIkVaQ2EXgCR7tuiZw3xD2
3EUw6TvlmlRqP7l9+9TJyJSGoxibcZIlh7iMseFLPg9XBnNu6sw5eGo4EZWktUYt
AKxWH89QAOmscGl2BA+lKPhilBVYmrYOGK9XWQoMMorm+IKEj3VkoVqPEXVXqFgm
ECQYK2kJOhzQFFaSGjIMsE5ow5PKMCBmGJIyNie0S/txaQ3oKkn/cgiR/mX+OHTk
dbOlCbN9fa60KhFcZ/gD06u6vfQARlLVw0oHidEUjylOUHPLtW7dUyJoqzDdCJOs
UqJRs6J+LrfcTLxoTllVnFtTReWCnjsO9mwFklgGY5G9Mke5EkqldmO+4af0IUU1
jR/LFX2uppJGBHZQkXaBc1xczdMgalnSd/fVHietRjB3X1XITK/IlSKpumLwXZFV
vp2SqM3A08ePIIVmhkGbxNXIM+212PXZpc6wGosus9YCfCWEKOvvbu5P1/fkXVym
UKKWPRRTO4OZS6zR6xrZP7B54hoC9b9K/swIy8+sDS+jbqO7JbklWakaGiIncM/y
j6/BAtf7Kv6RcrhPfQm4vaTjYzY/Am7w0wW6Y1+l7dcDk0u3BaHz7dMYSK0LLFJ+
6ltibN9VOsibGKjqXrMW1LPw0x5GWj5mQC8x+o729kakVj97R2oUNEWLHkbGFnWv
x3B9uZNa21lK/Max8L0L6wRq/CYZLeSoLgGlb+LeHNLeuc02yPji/CB3HksDdJrp
HpUtzU2fRUtwY63GEtAZyvrVEiEdZqA7PS8ugI9EzalPZhsxbNdB8hujJyLPft19
50x13uYAnOwegy6zoj+Eda6ptt/i9t0F3TNK8i67scmEJlr17qoBRq3B3jUyaVGf
FSJgrpPwQ3MP8+hSPoL+y9rZgcSMzeGHvRLWkWP6kpx7DVKV4m0vyR7L8QGMlg/p
NUh3u0bENfbOEBzfur47anInyldlc0xmbnPvdO2hXXQ+k7grUPLsRzr1uxs86ZMY
+BRkhMXAh5dOJdpyNcgr8gRybFEvidU3Jo/m18DD9UKGfEOA6TvfIrwnXE/sGjCk
HHRTDT225bqdZXPE9gm02dKwRLEwiq6fyxhvnF6CMFVoeQDvSvehgJppnVmfkb3h
0R+ptT35vmRSKzdaJMo2VRjB3gNhxXi1bovHKUmIG5SfI4sRBH+QdYc2mhEbBjZH
h1S8q3TQz085AG7Zj2o5hLvm57LTuRQMv6utaBvT4QbkE36+y/YM3J03LpuWGpqa
OlxEB+FQl2oJaWHCoYrH0RtV/6OkY2TD+LwWfmnoROIWJ7m3UCF18LsddIvQmrg1
4eKY1XaTfTBZdrWDiVvW/tT4j2u41+x7/2e5V9hXzrfMyYJ2lbuvZ2ht0U54x3w2
MzqVNtMuB29CeDNv2lsBwnqZNUpLxGtkGTnN2ZaswHorOARhN2HBlQFDWy73wM9A
EC2OzuhYS0j3CMQOarZIdzb32ew0zxlK9GDHauB3Oi0YLH1fzsQ6QJO3QHeXPUx/
ZH97ucA+LVg/IV4YS79kfxXzRva4b3aNivz2ob0ErljmR3YO2rGxe7f1twfBxj7w
eyKJ4MVDZReWZ1Bv2G4AlhrexBPusAG0Lhy14o8gL7gfZi4Fuihrok+GyE9OXCd0
HYkcQ5+21bGN8LY5teAr8lkecViHk2yrdz+edvww7XSt9U/cNUcPlLmwew6gCnZ3
Rru5Pm1rvoRZsQut8l/AuzBpDVxjTxrM6vxMZXdFip2faYuJ6lD9Tbwj2/nNzDg4
0JKQc5Qr2sfXwBVrc9IpJrkzYqjdlAbbl88ayMYPk3UQxx/tAuEObmWbdDOcZReE
buqA/F6d5xtPX6Bj4fPeksUM/CV+FwaWsQ6/2gmTtVsDzt3VcgONTf56eyi9oV8f
wJsmEx1EF588+Xa3s0GbZGbZuEBLW4RkUb8FtzsPxwHNqBT5Wg8yHZyl1pxvtniO
pQfGlbzobC99m9wzm0fwR19NeduyEtPb0agbyneHsf1xarIsJUXWucMaNM1EHkIa
lzbOCeJQhWLJpn1DEyNjSXEZCanalPj4T1KQwv45izMVn1k57bV45a+AobJJaFS3
FN1aE0ErVT4ChwnmtYUyhxU0WRDNg0qgqVU9cUiorM0yWYeiln4iz4QbIZQYNWuW
VJlIEsabuWsx6i7QnD5wj9y/ZiQORU+PVBfNqoBrLtDlvSJ1Sufwy/q6evgthixX
ucpKwpYdP0H386xgQhyZSyCtA7c56NiNYsABXJYgHTlb3Wq+4RggoW3bnqvSIjFI
OHvIqnH5WTrYr9Fibx6qhMaw3Ri4cYU2rEsZsUGvQDqw11dLftiOvIVD33ceyGNH
3c3qWDy7t1EeD5doQHq3LXFcQ6TO27DUoQ3lpEXe4rtfVoW0GBMcuIvo6KvwJopV
JXMjRHf2Y04TZTM1QkV+rsucop4yAVtxW3XQJ/gyqduSuG+RcfoJFntRW5FAaTEZ
OcBjTUu9bGxVuUtqw5eiPcbZlgplFXXd81xsCXA9Rhrg9Vryt4KRc4h1Bf31GOLM
0YihYiqfrBIOW6TzGR0Sr6ixZEjKcEegD29zRS2+XPWTKOA7KE0zo/lZ7MsvHF4S
NsovzDI6kg+u8E7L546SJZYc2FPVIT9jmq58h86WSmiIErtpTarmUyoLN/D0JVt6
BKlcOhXn822jDlBPE72y6xqcsmNnFlEtXTPKhc+WF8djvC9J7c6LsbeuL61vo9jx
m+8nXcXystP2m1+gbYE63BgELtsHwKeJjSlN3OIx7k6A0FNtGhypQErKw7jt8tQT
EU7MyeXqDvLINg/83CBellBhHEGCiaBSsrkGpa5SQRJ3I1xHLyyYf2SlUEhmlhsf
NVNXD6XQGJQKuSQi96R+uVkR18ZChGlAZoIUdwojqsGHe4FkXl0SfujGFNLXKalk
vDGor6VNgHpKybdrTnRDuoc8IwJns2HAYRxfXfsEQyw5PT+DiAqzMCKvRYtgGdnf
VJ1EFI6NrQ+x3KObHAyXfR8hrN/XXiG+bs0TOOuL0mCNAQgwXFtGt9+eLELdRPDi
E+dI99ILqmCW3b3jOPQSYSjywFC++LBekXFmzQvs9Mn3dXm2z73XOoWJeKb/DT7H
u+p1NxhLQeUbArstjZ2j6xxsOlTnMqgqsv495eSXaFBlVHAcvJ7UIVZRBMUdVv4m
vmqFnzCsFTiMVa6+3MpdpdiVmvqtimo86pBKghpdJLTlw0n6EiNEvDqAi87+zMeN
Qv8x/MtiU0lVPoOgww1rcMgzF6rRBEmyepLyD7OFN3mORJlnsMahMzxf4oUapFEL
+SkTAiwcSdUoFYAOhYLyDAXGTSgr1/THWPwJir9Ns0584utJ1C96m0YHLLchzAA7
Rard8nt8J/9CojKvo6r/UPQKzGaOFxhL7lFohEzuxGG8YtPcwVj+UXm7TImndlVi
WjmDLVFK3MS9MyfZQSJsTHxent3EeSOCc7nJrwqp7ynNI7vttqg4u9vgZ9ZB+w/c
Tie7QyaUcJU11Jb93IMSa1aFNZfLHtmb8dTVYmM4SbHEzHBlnQ08bjLjWWyXoclL
jGfPR/VfG5T0B/vcauVb2Y96wBthkoa8cTLJibgeRWVm0mqEBiU8luPjTcRNeUTj
gQG3/wYnV+tIwFw4/gcvRqNvxWHEBBoFHEEyvZ8N74Xsg77sSTE/4S/Hjcd1Kuy7
158gN6A+Fj5CJ4BCvfHPBwKuepUIk2Zi1YSQb8g5BrJKF8fmrvbHpTO15TPoxIbH
4osPySAxiAYKM05bnq5eizdhP+NyPoujt1dv1vgIVU/doW8k3l6Fm+h4gWNFdbXQ
1Fop0D7+4HA5ezahGg0/8V4nGPbNrPIT2nfan9jH2df5wpNxGyCX6ml+1doA+jjm
72/JUJCGTRb6aBnLkNotGqrLaHkohjNIWkB3rNs2lYKut2ArH33IZhwIWja4RJZs
1mbAjE41yCU8ia7nAV7pADFf2DLqbbb3CaywF5FJXD1Miex76fcklXlaBzP64omc
j2Oze3VxDfRVgjFsnagEWdnqXj/dVeQmcTyKTsg88uk4mW7qx9f8RiFwJVPjz2Ob
6ybXS9q52pzuDi6rYMwwK2lCtPLYQXAxVxWQEK0cH8HL/Y8Z6WaTpT2bjw+rwJ2c
wtOOUFfKWZyaqlyoT8y0NluLujBesYzltpH/DYj15w0rjHSMzH8Hsd4BnH/Fav4L
iKWqJiImIfoHaPNv0CuG907/x+jVP3u80dP/B483Vtb38dP+9iR7f2jxmVjfncje
0+8I1Pvz7mn2f3ig/ky/9/NH6z/92ZiZWX4/735v/9737febX994r/WOhP1uQUf3
t9psjH/09s/y92/T/iP95zhp8enfW0L98Zv11yz+Oto/5vXe7u/zov3TK+93b7+e
v2Juv1X+r+v47zG3f1m+f3Glw9egYmZm+gNs+5srHS2zFtT/gysd/l/Btn940kH9
J7CN8T+Cbf+7Ix3DH06lf9HBv7kdiOFvtwP9CbbRszAzsv53tC3CC1JXceDlbbzj
7pZ7Y8PEmWXZ0MESPyaAEGFk92PJsJdojGiLDRuway4oPK8gnwYN5zcsztFPwEH5
geTz7rKmjerV/BTqDXkNhSW8zm/Zqev4t4tv52+bE+NPXalu5xPpDxvXmROzRGPG
CNBmBJ9miqhS6kJCZGqw4LrTmzzNKD2sfyLlYXE4zFSALTssevIn2BhPdNsZ33IG
XCPqjGfRGbnfZmh+q/1hiWw4ZcYUFViPRtlJ4IGbErDrcY0mPTYf7Hr5DKZgPcyV
7el3veSkgDq+hRIwzhFF2WSqdy3vHXRdO7xAo05PuJgljd//TCFXCDvbX3toHinL
yzXMI0bllnEASUheir8LGWsy5ibYw1atshT09Nb6emLocdoNS+DfclM6FTbGepHW
YbrbeopTr6hfswUgXbmG0iw+T8aVBi/bW7t1YCnNC1DRfL5ZEhgUJ+JAej2YeZEn
Y4vqL5hdMNR2jFak/N54G2l+Ku9ZPKdgdr4pFLYdhfI5mkAnpAHn8EOcJLEEIqBs
WOVzI76VCPtXR2QxkY/22lgC6iENGIescdKj8b2VtSUr3apQWysfNhapH4abRTG+
hArGquBH8qZFNACZMcRJN+wSQccqf8bhZY8sIEzbs+jshvK6a9ygguP4MVmNXKxQ
VxyPOXA4WY5VN6SXXzfEp2KY/nOE+Vg7k+qMHd+DknoKN1MokarlQTq+8UrXp3pv
QMJ95lJomIxD8CQhjnT5s5soVKjYQRnpzJcfk72C3/dB4iRL+r+IF8Wb7ucIalRG
jb4SJ+ltfiIJrbNZKrWE5Wic2y9ZW3sTv1Wpe59j/2vYuc6SzrC4c0Y02xV7wYQo
REwUvld4gcHQJVfQefZydmimlzh5zFEMMaGVMPvXG6q4LK8wTaNs2whEtuDjGPQn
0NZR7kELr4i1SW7gG8QnUoeYztWV8iL76A9xKGz46gkgnrnYWzfKTfU8Da+yUBHi
ukW+ck8FwLPRimJglULr+adx3Y3O0g2ZXk0MSRHWh5uRnSLyojBcbvAy3tH9McKf
mQio+GeB3PGmnwrAzAhnUQuQP9XAtIYhG9gQdPrfcB8GFRBECtLX5Fe6SnJwzKah
I5yeG3Ub2CDgCT/TPlWydvVpow01L9v0X0phE5b4hHduYIbGvRoDkDTzd0p2VH3d
A1/cTXIZ0g7PdSFo/eT2UESdRAnfJ8s7WwtSkePkDghNPyG08Q3Kr0j0JIuaii3+
XwAVQOq/DESbG9USA4GAMZ4l+lwGCNnm2OYE0xIPPoJTniXuvR8QzxJ3rAfEs8RN
qwDxLDF/OSCeJabPBcSzxMTJgHiWGDEWELJ29sQrhcXRXiPm0Vh/O7seo3Q9Rul6
jNL1RGbX8y/5QeZ9fLS1rAwjtklLlpZFW/bSlv20ZTRteYq2zKAtt9KWVbSllrZc
S1uStCVMWyK0RaMt+2hvDEUL1dp+clqj+WnLW7TlZdrSTFsStKWIthTSlhjtpbWz
/NYrQHU41IvDzv6c6Fj+zsv6gfvYWT5GNB84nw+ecAD5EaSMONPQKFaQbRyI8GPB
zrK67HnXPpUL+1/OXsOFr2EaXiPHkGRM0GtAo9dwk9dwOzvyOqTJSAeRvkXKIOnQ
ugDvsUHkduQVSHVIk5FWIn2LpBPd+RZdYWQhct7F7aJjFcjrkEbwM/YavgX45rN8
LU8Nq0n1cmlDmNojdEQkE2G9iNcLxux0GBzt1Lr7O+v331mJsb+R3cs2kDxMxMbc
cUPrD3nRdvpwa2JftL+HPkQiMrCO1pAELcKxN2kW5z1I2MDLq0mYvYhjZWt4PC6z
tybKo3upjV+1O/pD+ET0y3A7A3gyvC/6Qaxdpq3RP6Lkxd3R98J3Rd+saDegZH+i
neKwNyaa7gn3jr78lmi6ChWbWqO38sPu6C3hIdF5YVExI1txbTPONHt0dGJi9HLc
b1B4alRrxj13R+vC10Zrs6168Gt2R7uhC8ksWIbOlobFQ+MRccNxvdrpbK1c/6B+
gn6Evqe+Ul+uz9dH9Xn6kN5tcBpUg81gMZgMBoPOIBuYgRjc7ZnjWpJLPbdOCD8d
EJoSWcAqOAzlbAY5YdTAyJUk5ZKGsqFjBtChqYPTyNCpsdTZMfF2aho1MaXEB9CU
cygZOnZAqndyaLs+MzrVKzk0pR95zYQdlN7bgNIUW9tOydgJ7TTDi+4MpZwDJ+wh
lDruvCfEjyV33tPQQPze5XX+Omc/R83gQf8laxKFTYOSP378P4JJfzIv9eDQMRNS
L+Q1pCo5kMlrGJr62ZjYpAl76D/p6fpBe+g/+KFhwh6pH/1n/WheLvUb1NAwtJ2O
F+1IjP4D7YAxOKCdAYKZtyMxQyTbblO2XRGuR7tCfkA7o5EUiXZFRqNoJ1Pebkdz
Yf2gHYXI0MYXI82iTbMvdmmbt4rQpggZ2nhbyFuizVveFt4m1U/cJhxGkwgyNKFB
EhZNwjQomoie7xBNKnJN7rrY5C7xJCnbG9GGZ7iN9XhnG+txtLlkIP93cMaAZJLu
7NswbVL9jHh9U7x+BlJT6u7ls/2plqmx2I5pDbwilpISTVOnzebHKTNSDfEZg1LT
4oNiO/qK6/6jehKv7hsftINMqh87Ycckbcag1r5a3/r4lEENO4eMrO71k2fddfFZ
1SP/y7NG8ptV82cNEdf9x7N68eoh/Fm9+LN68WcN0YaIZxGB4yMn7DCQAQ0DMX/8
uJOZTcDXplB+wwCvuqifQN6++f5bQ3uhrWwl5mRDyhIfkLIicbzu0r9Lf14FmuJV
NhTbc1X+W/vmh/bSrbkqFcWO+ACSXLqseRnx188ZlP1rxgdFS5fxqcjmSV72Xz9o
Up/SpgziuvXQVNmYoam6URMn7NDrUdo0qAFlfTrLzOb69szBbGFXFPbhDSXpYkNe
VsvLjMZcw/+JC6JPKMbo7IGisW8n1SJ0KWlukFKRoWMZWMHYiRiGSRMn7IUuxYVE
cwNesJkmaXPn3fh7CJhkSwheu7kzLV2Wg3JjsTR3FE2bkyTZ3DkknbdL8sESmRir
pUmwNmUvCSAFledJQE4Q2D+ZvyGd5Mf0nMxJXs+P7CswuvZcImQreZnOIS+TA+RV
ehpXbSd7SBvhKtAg8hhZQX5O1kCsTUTJXWQ0vgrKf04DmTZYJk9CYD5JDqPt1eRW
spd4qT/zJVlJ7pTexVV3EispIP3JSLKQ3EOvyiwjk8gx+XbSi1xFriOLaEtmQube
zP2ZZ8izZI/020wHMZMgmYbv4cw3yp8yn5AuuOIB8gg5Ru837iIantKClo+TJWST
1CjTzKzMOfQgn1yPPshkGDlMD7Ik7j6D/I366QppIO7ydCaVOYRWYdJIZpNNZC/t
QYewfGVSZljmMPHiGTfgro+QVrIb33byS/IRtSinM89kTpMAKSdX4H3ayO/oQSnd
sSpdh3FTMEqlpAY1C8mvyBvkKI3TX7OFikWpVDTlpsx7xE26k3Ho7fO48gv6HbsV
35XS6/LgzABiw7jcx0eb/Ib8hQZpBR1Bx7NStpA9IS0hBjyxO77TyRyM98O4+5+B
RruZhR2RnpZflM/r8tLHMzbMSII8Sh4nv6ZWvGmMNtPb6Pv0MzaQTWaPsr9KP5e3
yX/QT8FbX0sWkHvIi+Q76qS96Sh6DZ1NV9A19D76CD1Mj9KTrD8by+axb6XZ0mLp
l/IAfMfIzfLtymrlbt3J9IT0ofTv099lKjOrySjgwyr0/gHyBN5sDzlCPsT3GPkr
VaiZ2vCN0Xw6jt6M7630HvoU3Uq30TY85Sj9K/0SIunf9DyDpGU6FoLyw1WgOFsC
DfPn7DF2BN+j7Gv2g+STCqSk1EOqlRqkhejVGmkjvrukv8hB+YicwThXKg8qm5Wt
yovKq8ppnUV/G2T8Oxee7ijr+HOapNemH0y3ptsyfyEezCGkB0ywWvR+Cr5zMd8P
AuO2k3epBWMXpGW0H70KIzOZzqWL6Q0YyTvoJvqs6Psv6H6M0gf0W/TZysKiz11Z
DzaAjcD3WjaDLYYydj9rY++zc5JeMkt2ySOVSUOkRmmGtFS6UXpQSknvSJ9Kf5XO
ShfwzcgmOSoXyAk5KQ+RJ8vL5Cfkv8l/UyYpbyuf60y6BbrVunbdP6DV9NOP1I/S
N+o36Hfr3zM0ATtfI7vIK8DAix96XFol1Uu7yL2sSg7AhPkd8HkymS4NY8BUtpWu
ZbfQNlao3KDry/rS4eS0nMBYv842s7OsrzSMDqVjyFzWPXtDnVt+AVCt/Bo5Je/H
u/0Od75BZ6G3sm91FtIKHakGOtJvpG5yUnqbfCQdo3r5SfKxbKI+eoo9L40EFvxS
7qdMIPnSY+QX0mJ6C9nF6gkxnTesBx4Ppy+AL4yllfR7KQM1eDiwqJf0GbmdzGN/
IqdAx2vJQ3S6PIvcS6roCvI38hyoolS5Tlem89A32Rx5HXPRNsLkbXi7GlpIJcVN
7qCN0ibdt+xDsowckU3kz9JL6P0R9gtpmHxaGU1ngwJuIavJ4swqcqMyQf4DnUUk
Op4UycfB3VZIlXI+jivBVSaBp+0Gde8FH+gvDUOJH5hzFfBiHDjEJnwfBp+QgUFz
QONXg4v9jrTpxrJ2MkuxUXAdeGreTo8mEzPPkUcys8h1mftJF/CDNZkVuONW8jnZ
QLbSO9M3k0UwJT8EbV+lDGZHlMGZLmwd+5CNYQ/+dH4x2kXUT77C9xeYmX7KPrJO
/oCMIXWZ9Zk/ArtLwGEfIVOhsJ7AW36DJ1wuHSRV6eFsR2awtAjve4yMyjyfiVIT
mZ2ZT0aQ/eRZvUKm6JOY4xT9A973ZjKDjc4slWak52AcNmAUNIzWMvCfu7SB48b2
1+r6XVbbt09N7149qqsqu3er6NqlPFlWWlKcKCqMF+THopG8cCgY8Pu8HrfL6VDt
NqvFbDIa9DpFlhgl5fXxwU2xVKIpJSfil1/ehZ/Hp6BgyiUFTakYigb/tE0qxq+b
gqqftNTQcuZ/tNSyLbWLLakaqyW1Xcpj9fFY6vCgeKydThw1AfA9g+INsdQpAQ8T
8EYBWwHn5+OCWL1/9qBYijbF6lODl89eV980qEs53WE2DYwPnGHqUk52mMwAzYBS
vviiHdTXjwqA+er77GDEYMUrpoLxQfWpQByX4jZSUf2U6amRoybUDwrl5zd0KU/R
gdPiU1OEa0pJ0YQMFI9J6Qam9OIxsTnQcVLk7tiO8oPr1rerZGpT0jI9Pn3KpAkp
aQruUZ9yJPHcQSnfTSf8P57i5tDJ1lxaG5LW1fvnxHjjdevWxFJbRk245NpQPr9D
QwPugWtZ0eCmdYPx6PWYqaFcF0+xOxsmpOideCQUyyLxVtn3y2q9RU1zYyljfEB8
9rq5TZia4LoUGX1jfmswqO3JHCfB+ti6sRPi+am6ULxhyqDwDjdZN/rGnQEtFvhp
TZfyHaojO7A7bPYcYLFeCszAoGfrBCSac2jo6IsjS3kf41dAE0zFpsXQkwlxvFNv
ns3oTdZN640JwKeB4qrUdMzInJRxYNM6tQ8vxyvSlFKkxmPr/k2AAfFTX/+0ZEqu
RFek/pvwSo4nF1EtRad0wqlkMlVWxlFEPxBzij72E+c9upQvb2fx+CIV9jM3GshI
jO2Uhj4VGP78fD7Bd7drZCpOUi2jJmTPY2RqqJVoFdCtWROvOdhZ4xnHa1o6ay5e
3hQHJrdxe5Z4UobExT+76nXVz+6Tot7/pXpGtn7omPhQqMax+nVNOawdOvYnZ9l6
PqAYN9TloJRr4AQpxFDGIRaSRG1WQ+5sAnV5giUlF+FPJ5B6erveAKwUJTQ2OKU2
XZ7NG0z5+Tma+X9d1J45za8Shx8vy71Gqk8y19Fst1N9f3L+k+5Z1klDx4LlMGj2
69aZflIHVMv28orcARgPQz8/NjBFxoEyi/AHk6M3Tw2hlIYhQ81YUJEobgjlTn/S
MJS7qAEfjp1dygeDZ65bNzgeG7yuad2U9kzL1HhMja/bw15lr65bVA9ul0Wc9sze
u0OpwesbMGKzaR+QByMDdsTp2lE7NLp2zMQJe+DiiK0dO6GVUTawaUADnxY2cOyE
3LCICeGojznEigkwhst4fR65nr1AVvAkv0SW4Ngf5Xt5ndxMxiEdQ6pFGo8UROJl
w5CmIEF/xPlLZBGOE5XxmQ5lPHlQeYPMRHoC6TFdDZmGsieQJsmfkW4oe1J/D+yW
ZnIl0mpYiyNxHIw0FM904TiAvkHWIt2ugw6Bc54G8SP6difa16FdIc5vBxzE/biD
Jx+pBCRABSEQrBrpyEGcx8g1uRKcCMcPFiW49Qrdng+CHnq4kZhgj1hgw9iIHesw
DuLkjYlL5G7kHlgPPmgI//PDdU6xQATNMw+SHr7T/9kIvciH9I6TQlIEbZ6QYtGm
BLZFGUnCDiDQ5bpCI+kGe6ASZ1WkWrTgT/aQL2kp9PgUfZf+g5VC81wmr1Ou1xXr
Zf23hnrjBtM201fmaZbeVtn6pK3eHrS3qb0c6x2fOZe5fu7u8Hztfd23xb8yUBrM
Dz4aCoS757nz/h35IDoxv2v+wYIN8SeK3k1kiv8FbxgeqfBhkTAqJN+R7yhCBs8Z
uRCTDl7QFHKexOSDvNH1mbd0m5V3MWo+vH0xNDi9ZtoY2Bhksw3BUIj7je3+gNvv
D/hDHnsg2D3p3M82EyMUJwvbrJmlYCAg0ZDfX1TCy6Mo78o2txaZw/vZJpJET7qz
TTsLXuqh4+cenNtxS2MMU7ms+uqJ/qR6tvHUmVPqWWSk7lTHKbVWra1DUgFTh7Om
hqc1XZO3qIe6d/MPvFEbTatKI8koqYp1j9IuCUAVhYCszB4lPtkTpQ4TIJcBUFle
Cfym+cjKi7tGSbc4Mhu1RKlXQaaanVHi1iPL2ffwGHXa6qtoo6u6Z1UltCNdvCBB
C3Qet7eqsmeP6oREqyj9v9Rd/8SD63a9svrOHbRmYMPEAYOQpIL7L/yFfv7EQ6hY
g4o+vLC+YaI88fFPfnNg75uv098sffSe5qWb7m0+16wz/vAdvfeJj3nFG/TQ0kfX
L+UVGKwV6VGsCfOkkss0U7Edy0ZOvUFV22nVTrLZZsBRc+g3264lkirFJEl6yfH4
ejG4HWf54JI6DGr3brSRJpijulfPXlU6Pb4eldJjD/xu2MT9q24sviyO90+P2k+/
p7ZvPuo4f7Rh3YP7fpmOpvlk/fj8GZqlhJWozGhSKXEaeQ9MmyWKYxvW9a61gZO3
qSobB+D7NrtdACfarFYBfK3ZTSY2zm6L2pjtJWeuj3zU/6OfrjhxVBcn8K3yQkdV
WccqTE7BZcU3rdo/cdiR9Ch6nP5l/54H1038w/mOj75J/zNtQC+XQD/uI+8GNvfW
ouQ6I/vBIF2n6HXG60yy6QeFXlcHA5CxgIVj3nD1TOOwM7WnatUTtbWk4kxtR+2Z
7t2KHPk98h1VjnxPvoPR9GK64QW6Ib34FL1/Kz9uTV+H5/Sn7WwuWwD6KtcCi9gi
iQ2jwxijccKCyiI0CMiL7uFPONGofkEqhp3q3o0sBkr1yPf0Z6W0fdcuzt/2IlsD
L4hEijQ/qyUmVjsZ7omVMHPlLajfIj/5sJjDRk4a3btV9ajy7D18+DC/Fv4hVgN8
kMiYPUTK/LnVXcPaM3/WYu6ahyTKpM3SdixQLicUTI+CIUjEJJ0k7CTmaRseLu+8
CXeuVUF5WdxYo3RNNgoao43JpIfj+LaN6QkB5etzuAMj4zJ/kx3KQeBfHh23g3Fh
pJmCEVlxR6xWn7E9c1LMNQe0AJ9so4NY+OwTr8WC3MLLSAUm+jCyw3gf/kahHbr/
eaczuJNuHO70BbBGAN9oAbMZkIOovISoFgvPednFW/54zzZdLKCGgYatLGb+FZRZ
L5ITyY7lhKmybg1ba15rf9OmGPVmP6t3XeW5MjAwNNY1yTMpMDo0Tz/PPM013zMv
0BS6kV2vW26+yb5G97D+QfVN/0fsfd375o/twYsv3mzU8uPV3YyUGFUjM26MOpoJ
lAjNhtIYTDJGNkbeuFtMYhJ02Lg4yaeSvzptXAznVm/+oUgNDS7VyRmO1wlkB88p
TrhUznEcaiJeoNeNm/fuluWtSwfMfffJ9268b8+2FSu2bbt1xZWN7F0q08temrwz
nfkonU6/9vLDr9DH0w99exoeo7nfzFnNceUYJvA85s5EtmsxSbM6qufJK9kG9ohB
fkmmRqJTmGRUqIXRt0yi9yb+ToTGcC2WYAQ1A/hKc4gJDYsJtYkJxShrAT5dnXMi
5idoUTSrvVrpHIluCo3By8aUgHkvraV3kixpLE6C++c4LkamdlhHLamr89VQRw0f
H9KYzI87dDp9j57gV+x8W/93xz7014ql8s39VkR/MeStyfzdaoHLerxbhL6RwyWj
Q7X6XS7dOGt75kybwyGAbzSjqgKKuJUIR1EfbxCJ8NpI2IaaCBAUeTvbp1mYyedD
RIODsVgU0qfivcM8P0wqTvHO1vH8EEzqUI4M+AMtTicTD9SMdgeg7HOOa2ani42L
uHkZv3crbs1JxWxm4wB8rYlR/G9P4zTCn8efJh6m9eyr9NXtUw7o9unfMLwZ1l9h
abCMtc2zTLfd5LzJdZdzv/Pz4Oeh00HLAfMrLhbCAmWeGlF1v4JLVA/kN+BoxGwF
IybVoNO9FQ66w+GgIRwEtzAEw5I1orazZ3aOcFAsX/p38TcgYjjslFlMzb53Mdoc
1+k+torEiEp7axbHrjq4LheylUxme1khpP+GHVlk5xI9ydkLBE9HLeR64wmHk88s
sjW2rkkbWA2X7uCLnRTQmzTSxiUNDUWe/EQvzHhPLmzjBTp9cc+cIIbA0kFVutCL
+Yqe3vTt1kduvu0xusf1/e/fPXv5868+NSny8sv9a6cdvPXQ5zPn/eyxda4jH371
8oQX9j+zdkp3YMr4zBeyF5iSpA25iTMH/BrHYn+YUI6qSQtOaGncZLVb7BGTqdQT
CcuR0rBSao1bLf4AxF0MrIeNi+kTfBZ580QFZ2iHK/iXOGvq6lRwVGDLqdfV1501
6qFkJU9AFq1EsXqt9dbVVrnecbVjeUga7Z2vznVP9y6z3uhebV3nviv0rNWkxCS+
6mk2W6w2WU/xXIiaZ3ZqeIF9cCqVEivt0WaxeGT/XvYMCbDZWjF6qaCbVmfz5NjC
GIv5OSbHWvTNCcGbEpQk1ARDj8+8wmsSG7v422nv1sC7dC/tDUFyUDP/yK3K2+n9
uTlMCr0syXnWmaQQQZhHTCNeThXzmZ1OkCpYGKiVLm5w9fLmtCTwrF4Xwc455NqU
3oucQKca3xZ9YN7K7U/dUnWV22lubl89d856d1v+V7+44a15M6fftjF98v1fZ+jt
/kfWpG5b8aT7CXbDLdNuu+OO2K43ZrVOn/xY18gv7z2Y/vcXYLFB8ABV2Qv+ZqUJ
radzgmW2ZZNlm+VNi3KVdJX157LkBI4Ti07SKyazpCcWEPtbkuyWJFmyEmaxynpp
H4I6DFCdt2gmIstoQt4yye1s5iuKYtLyotWmTk4IgAsmNg7AN0JCmdppL82q1wri
1fqW/B76jXaIYoyq1V1NmMpiTML5cXENgBO7+SywXbZ2ul6M9NfJZKNghGc4e6lV
v1AFH1TP1J6tddTwQRYKsAySsdvtGG6xpmWFzHfWgMe9p5mraqSCLjWSnJdXy2/R
gMlAG81t0cw1lpaRNRYtUWMpCOPYpYY3SDbAHOhBqxxVnrhDclD2YMcd7PGfvf56
W7oHnfystPvClc+mnwRRP9AxD4jHZX++8hx47Pgs5WAtHO9n5YNAwzZTxOMJOznn
NNtlORK22ijR+yEvhEYgAEFlXO5zKuHyD0jUcQiUwQmj1Cl4r13kQ4M35q3Le9D1
vOs1y/uWj0MGo8tvKwtKxm5KN/Ne8DEJ1KG6TB6ny/WWze62udw2uxUkorl4RzTb
FiiWNrvmoblOvWKX6bucfMDVtBjvnmOyulBdqW5QZRVE4hdE4qfEr/oZOpslEv/G
mHM/7UHs9AEgVe9W267/RiwIx7iUWATTE+TSCEHGeZ540UZHTUUj2MKJNYauSQWz
SATj41K/N10MbesnZANacUH3lMDziMet59bHuF96Hpl/W9vL669eX7LtXvZhxysj
7rjvIDUsvefMbztoi7ru7kNPbWodUedl/3gpvXxS+uzv37iv9TjX2oZh5jzgeXmk
jI7Icb2onUaxbAKjrSSiWanVCpEYUgoibqspQkmRiiHIanBqxKdyge8TPM+H6QGc
0+AOv3dY/U3nTDaeUg818pnsMi9AB+k1z6DAoNhE59jYPGm6frphrnN6bKlhWfhO
w+rw+4b3vA59jFNAcZYmdOPiguHxonxRoecVxbF4LJ9XOHgvR1oZ+hmi707mEwmm
Z+zsM/TZ3pqT7CpqVsVEwiZRYX3gLU6/wrVEdWO5ibO5CK3RvHW+yb6FvpU+2Qel
VDfO5+UP9bWzwp3JrJIGSjzFJZeYxKymluV0FY1cZeMzxsmHc7sGqod1wlUznZ4L
KCd4GyaLONReOPNS94+cUCed3+kvv2Le+P7jprL++2e1dVx/9I6/pE88ftfJlz/t
6DXi3uFLnnnq5ptekMfY5nYb1q3fN59Ma0p/94d1p27FUs8Kuu3XW1+98GnjCw3t
Tzy8fTsGYAr4nRcrxlaySLMdslIZf8wgG8HLOBV2Y1Q2WqzNksT4kIwQIlpiQbuh
2fh3MgJzP5lJdTgspCuhPAbAiAQWc3toce2wM6eGq2e5NsYtAy69axyCB+H9FwsL
RkcknT7e0+nsNUXatT59amhP+x7ptn/dJZ97ef0DaWf6fPvHL9Ov6BuPcf/DGGBg
ABjog8+kGyNZHGyzkFCkK+eR0MPYuK5dnfkRnVIScVojRgsXsFD+z4BNAkjauT3J
0RBAVnHigKi0+yErs8amAHgrADn0lQo9Fq5necQdPQJ9PTn0zVohl5gi4EfJUzVQ
R3IWySuiI8L44B0BwDtyQlgmHBBluedz9RePvaAV8Ib8sRy5+AN5zt/0x/frJBk8
iwp+mO2JsIk4BfXq4aWl3iu8VyS+sHzZTTF2w2LcLXSFvNSw2LzEssx6k+9uso6u
l1cbVpnvsKy23uN7x/G6y1kASmkNx4L8EItV8EOXGCT+cS1SGrOQiJ9Y0I0tXemP
PYk0HzBSYzubpanJZrsWg8YPr4JdtTN7O71vd6W/OSVRCfWthc2eTkU+5tE8zLOx
+0WT5gxoH1gDDSGnIDhrGiv4y3GhlaMYwecalywmixsaaCLRo9N30qkJEJS4Or0r
UPikS0mHzl00/4sDB7+at2DNPemzH36YPnvf1NXzZt9518xZa/tcsXHMqq0v37by
eSlU+vDcLR8d2zLzodLyQ2v3ZwilBzf8mo6dfcftk6etueNCZtjGEc+13PbC1k5b
luNkBFzxF1mr4RVzFCKgyAEBcFZMMpcEQrgDOK2V8Bn1O8SUOoT16fA7ypPmkgj3
ZIywSTabm4ykVKiRVhVWBeWSBkxVETN+KNlYCRRrPFUpBgYzzxFR5Vz0099wpBMG
9SWd+FF2amVCeDoEFv9fnvrTZ/3Ho/CkHx+kVfcJXuXV4td4r47PlOZ7FwRnxW8K
3hJZH7w7ssm7Lbg/+JX3i9jZmOsy7xPel71Sn9LpOlbM5W4cyOTPj+liJZERtslc
yIb569F3R2ZZchvvBAITa4gZHNnxU7G6sZzz6TbOph0XccmhOZhjY47zNma1TY5K
nO9elJ2dbJc0wn8CI1komP1Yj+pizm1xJGC2WL/kJnOCCoMh66lb9LJ3xZQxt4zs
SXvuW7D7AtW/vuHUzTf946mXPmJvP7v0htZtK255ko5Rb7ruqpV/WmTxj59HDX86
RtVN6c/gS/pbeucvDkjVj+4+9Nh6sFy84SLyV7kv1tgRVaNZNkgtMJkVnWRgyj42
EYUSm9jKNN1eOhIq5EjNQ16kL8ZkFjTItcKMXqbP+TprOXclgYrgsFP4+IPcXABO
+LglBO5KPZR6FklvX0hLjK3aSjftRCTHr3dyrJ0Irm+BxycC//MdWgVmLMRWBFeE
2NTgjBCbZ5liYxNhELKetkE2FgoY9DJRix0OYi110wgEw3Ytnl+QXxs1RWsLCmK1
+fkRcm3kOtO1vrmF6rUxmH1z453+WOGN5S7YWrUDk1GrnoUJB/w94eD9pI34kEa4
EntwTyKfDMjBnI4vcxXfxvQSfFX0TzTi7V64r/cz1zdv8u8JfPf2B5RMvH1CzyBr
P0znFDrnDuvTN/ns1D5zNm98xHv4o6+ea3pq6fArm+anH4KTiyG2iCgN0Ov1cNrO
2k1tdngVoUD/sy0HfC8IFCVntAZOoFx26MYpIq9Qu6mzDLONTepaaaP6pvK67qB6
WjUblAYE7oxUZ5tT6r8s/7L+y2aULbJVtklY/FZkGVaXQafXWwAbEKECPxu8mJpd
eDxieosbVUwCs/9eA5eHtInJFjeuMkYUxRDRSbp2tkgzYh/HlxpWbtheagYjMmtO
S4zM0EujRyIQ5pgsbZSpjMhYzTzSclB/zCJttFALP1ft+iN6tlLfomf6n9nf/wBu
I/DWABL+/ECUYEAFdfjraoOn6k6I6TnF/XbcN76mK4JMc0Y1BHbNGvXQIduhQ2uU
7BGzNjRlRtxcBIuDbbJdMuj3wiFAMt9z7txAl3A9lH/i8PzFpXzJlS8linV6iVX9
nk349MWOR5/8kP7jkcEF4Spl77nBdH96EJtIH9xz/T13cyn/IHDzS8yUQ2iarj1E
xpwM4f45WR4cHx+fGW823mHUzQkuUxYZm823K7ebdcVeo+QvLot484xGlzNSVlZa
SsJ5EYxbFI4ZYvAndBbuR9bB3tKquGzXOTkr1On4yOsM/O4AMeM6Nxe1urFFCUuY
X2Ex8XYWjhce3soSLM+LxAQdxng95pQz+RzA26LkHKzqiwD8WZzt4z6AGpN9J3EP
XnaAGqERgYRxMgxmcfaT83KgBkQCmqmtqXDwdQsq6Fp4suBQhm+v0/61sTjNr8y6
OBJxGGOVWTIC/CBLbH27eeasOzdc3fLr9emf0ctW9b5y6ODbnkh/TBdcmxg4sc/Y
B9anX1b2NuyZce1zVcX7W2btaOoujXZ4Zw67YmHp+S16S+95g0ffiPAgSmZm/qYs
B8/II+/umsbm5jEIKK5Eifc7qU3mUIxUWqeBvy3NayF35G0km5QXpWete6Q26xvW
o+RE3r/yHDZnniMvTyrTlTjKwrHoEOt499We8YHZyry8m513OzdJj9g2hbfSZ9hW
xx9tLkTZBFW3GpRBmX9uLakRQrFLSY1qJ1QOuSIWKRSRjWrCfiVJxCAzg1FfImag
BmhrunGGQGQaRhu6aLJxGOeVyMXKUN2pLPOBis49p1DCl1CfTo4XFIL/OAurKmWf
PsH5EPO4ndzzILe9eln6tc9PpT94dDsd+OontLzvgapXf7bts0kLvlj99F8Z6/7t
+V/T6/7wOfzZx9/usuX+p9Lf3rcv/eW6/ZzbPgHeMxEYbcfYfa5VxKJ0oCGLnQ41
YicGdNlIo8J9ZBRIZTRxjDLC+ZJVXzmDAEsKRvPU/2/U+w44KKbm+07Ui/wn6uXQ
kGtb3LGG1L0bFsV6SiE94uYVRM7LuoA/6Gc6swl0YJJ0Hq/b6/JKupDky6dOGzK/
IZxPvSZHPta9sKhShg/WuziG+rDWAkOGAT+L8itzPrhiYOUT9IcXJ97asLR5+E33
Hb4zjfWt+57tXj/sofnDX06/o+z15F01NX3k0PPp9LYplS/37F7/5XNffFfGd5TB
CFCiGEcjvWWH08xlv8nlqTb4LV6hq5/U8jlkAFON6Q1grwaIDslglBkz6g2yFNPp
4EX+WlArgH/CqYLxVZycVnH+nRbkSKM0xsw0Zh5pbjIvMreYFbPBGOOua/go8LAY
uvG/0L1mFoQv56jif86BqW/Dj+QPVw3GXAVL5qTPaV0srUHbhde6Zo3cNbnmlkNZ
nZKvyxx/xeKoNsSQYawbunfjAw7XTJtBG1wDMXJw9+Aag1aZBStr9AUBsYqzOwCw
Mgvy0nh2bcccr9Hb3Egufn5mtwtgXhbMA+jh4Pc7PFkXj5ha3kexuNkAXw/Fqlac
Oh57Q2J737iQVvaeXyWvPDdYbjnfwjF+GnjFp8p7WDkPkbe0kUE7datud8gXCsmy
KrvNPnNI3ubbbXvdJvl8/hCL5WmOEa4RPi04QZlgvFod55jsmuib7B8fvDp0t+8R
pgYikuSMmI2eRExPYdSfFAsJALjXjI0DcFrwXABfCZ4EIKtzAzgHxAAt6IMteTTP
nuBzqBMzBJYPEgmEO7lElk00dnLnYVx7vLi+AlbhUkl+pcyRWvCKXioURiwtMrAK
Mo2upT3fpoNfbEvvPnAkvXfrb2neBx/T0I1f3ve79AfsLbqAPv5q+tlPjqW37Pot
nfir9HfpI7SahnZS88/Sn2e5hNwB7LYioqBVK5/hmOdmQ9Wh7mvUa9yy2QLrwEZ8
fi7TiMGZMAi5ZBDrVgYunUL8XQzBWJDiL+i3/j8ZRQ5XBafMySzBLy6KqsCl/CKZ
lVWLxeDwgeHsgksozjS4VBIkHwHDZPn5DpA/97gLamel9w+bf3/DN+k302vpzfuf
aLyq+x3pu5S9NueM3Qv2pTs6XpLo+pWTbvdYuZSZBBv/75Ay3ZhHK54mTZObpaWy
XFTcQ6oJD5Su0F+VVx8dVDi4eIzUoJ+Ud3XJXS5bnKtxXBYXdgJFnQDM1mxVcSeA
xmfbrNnGWQCNswAaZwE0PqsN5o1KrIlCVigVF/W0Y3dFUX3FxNj4+Lii+ea51nm2
me4Z/hvNN1lvst+iLitsLlotrTPfZV1nv0e9s/D2ovutD9of9ERyC0ld8hPOUCJo
TJRSRHqUBp1yZfcEwtQZsXa5MXRXiIWKvNYukeIiWqR4wYzOaFn9M9LFGIl4JYGH
SWgBjUi5Q6NQ9StOZb9wmBUV2qxmJR+SJYTQS0Re6mhRYQHKdHBwdQnijmzcBuDG
KcS8CzkqOJ9KY3QkQtgW0Y1UB8sqpbm68EcqeDR6fKUxQUppKScrm42NA3BGs/I7
lQYr8U404eQslVcBwPCBGAHk1Fy47TClge7TrsmtkJ8AD4HuKXSeH4UxVgCSJ3h2
hhsvEM14Q6HvgMnBVuOMJ/vBOqerV4RBIGexq7BYuAC4j8ybk9get88LlxzXjmDF
FSYmvWKd/NtbFr4wZuSkvun5o+bMuvWfP3/6h9XKXvvL21JP1vSmH05ouWn1+cff
SP/rEfqBet09Vw9oHlQ/K+6bkuz19IyFv54+551VtrvvXXXNiKqqeSV9dy1fdqR5
6ZccU7tBT90LetUjStaqsAgGnIiQVzhCmnfGsnr5K7oYZRXc+UHpLirURjAvzSxU
R0NOb/xnp7r4VzF+IMYLncI7jRJOlbijYfcjP4qORqyHIXWcaPyCB7lkybF7N+6K
F8EGrnSevC4dUqwvv3zuX7y3T4IjF6C3bvKhZkrYJ8gTDG8aZC+Xa17ItWq5r2Gw
fKVhuf055aRdbyHMAfdfm87oTkAQZGUmgJzMZMKLi/PjWpgzUtYY89KYd6SXNXkX
eVuwCdqaiJkoFjWyItokRCZOs6qyADimADiXZUMmITJxnhWZAHJqi6nRw0Um1+Fy
n8ZTw1TwYsGksxxacKAkFo2qHDnO3APiKev5cchNr05Pn3/vd+lzi14d8vIt7+9W
9l7Y8Wn6wtP3UuuX0ogLrQd2TX1VRDZgpwDRL8cY+enHWqKUJBylzoS/hvR01Dh7
+q8gQxxXOIf4J5CrHROcV/vVhw0P21mOvKtUGgwkPdVKtWWQMsgy1DNWGWu5xjNd
mW6Z51mqLLXc7LErHotEqBP7FOzMwLl4Hf9wjOeUXFMT0iKSrChMpzcYsLRksRit
Nrvdgohqp8fr8/vhOKvdia0nMX60OB38qE30QD3BrmMWw8ZGioUHxWCIePxuj8fv
tBiNEY8ToNOB6ImY6nCrqsNptBj8HsUOzxNh6JIi+eGYNxoNBoScML/TCSvfEPT5
gmp/Ix2FxVkLcg+SRhQ6aneMK9mBQDu9e8fWLE0HA8M6gv6OjmCgwz+8fsagL6DD
cJTM5hzCG1K8H39HkaDaDBOqDbczoeH89IBZXmODoYmslmcCujSD8WmH8emA8dnq
NHEnGzc6h6aKUFiGwj18GbI33wTGbVQbSnZaNEXjYRGQVEsa82mVy+vr2QsHJw4u
2KiUm6eUPpG++Y1jhcHe2M3w1R9GxMNdvngtfd2+9NvFep87/Sbwpu6hB/5eKP25
I5j++l93t0m/gMLTuD42Y8j5p8HIr8yclMNyP8Qb9mJdtHKj1VgWsAbLSq1lZTXW
np5eoT5lV5Q1WhvL5lrnlDV1W2ddXbrJ+2hwm9VT0mlIQfAg4oVT1HOBF0p2B/aV
HAocKfmD59MSwyAvRbDBGQ2+O904Jzh3p3OiB6fCcfw86ov6k+Vl1TVyTfkV8uXl
4w0NyZmGOcnlljVYvvzB+kPS0avaRmW1orDaV5nv9k8uXVjKSsMVtjrbBttmW8am
bLZtt30LD6SItkHQ1VdCrgKA9ctjHmzCa2nTcTc1nHYS1jte2O1/AKv/enCtM1qQ
94PUF5sqw5K5dIo6heg4nZOifMjmrzuF9NdZzbtQ5nIEFSdEDAOAM0J1A/AJ55C6
cYXiQTjP8sPCdnaNZivW+Bp0LNEtsT2h1IDFCOkD4f3+bi6GEt15mWaNwAldc7CG
bamhNQiPOKP153f0FfkLKgoP6I7oWFRXp2M6kBgcAMKhr/Pz/uiEo5/ncAMgpAK5
cNLquvfuNNuxpAM7MgnFPQkuhJDDTtZU25H8/HMuq08g1iK7vC2q0H4xUJ9j/0X/
HK8QK3ZkcREXVdyXDSOJf+GQ5ManvrgfRB0km9cDN6QvnsBSiQ0KFjdI0Uiqnb5n
7vb9Q5ov7zHvo1m0qn7tyhvzUv7rjt619oWRqtFXsD/sm3po4aTKBXNmP5XIu33c
4BfvHL5quNtmDRYWma7rclnDYv/iu4dqU67sesPp83de1pt+WhJWS4ZVXN50zYjL
rgdGrwZGc3uLx2m1aI9SxWIvVHoo9YpSF01FWTQKD054QHhRdGNU18dV662FO/iq
YKOh0TrB3ui9NjjXMN86236d97rgweiHlo98HwX+6vra93Xgs7zj0Uw0EFMq7BXu
bkqdXVOuso9UZiof5f1bPqdaVI9N1jESCoMoTZ6wzewvPGpGiKUGm6zFLGctZbPA
UbOwkWELnhUyFMBpgUMAsqFfAI4LYcpLtAo+n+alsF7g/8RkE1mI1yqpiLGDFBrQ
FgTUnqZylNZhVx4CETNpgbQALmh5HL2oQBUqBCB18jUhKlAFLb5HUzjreVMvJxAK
fELu5o+ggciQXj8RY0CcxUuwMNYB7IHy04lCQBWOQPgTXh+uAEHrWUIWI3ypygFN
Byq2ipCHYgmKDhAh6y+lXZ5vW7Jj6vbFWvqfv9w/j1WPu2/5S88uW/6Ssrfj3xtG
bHirOf1t+v3H6YMHxt19+O2jrx+GRjAyc1I6BX4VpBNzq7nVtpV2ajdTDTs2F8ET
JzvDZr0/LGNnn0dv4G+vF2+vh24KGLYHcr74kDz83utCRcXaLWJUGkWMyhCjhUbD
A10DfWNcY3xNribfo+xRaZP1GfWZoMVgDZjmsjnSXGWZZZG1xfqcZZdxt2mXxeK1
rLZ8xiRbwWT7QvtKu2RHyMoL2o3dIH9GkiZ0ayPZQo4TxB8Ru90MFayzj2F0vdBm
4INtKwjh/QrNySgkIuQVImAwA5qYncvFnATFnFwR9hQe0dOovg5OUhtvpDfxRnrB
XvXdQ9WHchoXZiVL/I1LcmHzImyhd8OpJWeSp5aId4cxhMV5tfEE/oTeinlrgFsJ
tA0bUcTjXdRR+cxJtTvyvv3FR+nvlnx518ufRLcHVk5c+8Izd8y9l97pe+UIzaOm
lyhbtf3J0Lz5r737/qu3cbt6MObsGCgSvlE6TnvGxGRrkbXaOsiq9HD3CF/NxppG
u8eEZ7HpygzjNHdT+GD0PeWPrk8Dn7s+d3/r+3vgc0F53mg0GeTkOjTIaVfflRVa
u3r7sB7WoazeOth9Rfhq03jrLOvnur95z9EzNpV6JJsZLrcQ8MFBQJKS2V/Fl7js
Rap61EFVLL80OVocIE2OE1kCdTi5koslGggtzmQdOo5BDkGwKIUqyUfcYeMjjvNv
BJUC+F4bwGfHsdRZeAA+7GP6jF7mUzRCL+kjAuUEn9YjVpQjpJg2IZb0QvroA5Hq
kZdQWuPiYacuUhcnOvi64Wk5wecMKxF1CIsBXxZ0trgRZNaD82Iw4+yEgeaw+n6R
zqTeMw6t/OOyue/d3vRgxc6O2EvLlj+79eYbnlz9xPrzT2+m0rpR/Znt3GDmfOet
X7/+0TuH+JwNBReNgM48mLMxmi9Kwh64qxqVRuM48wxpnrLQOMNsgHLH45rFSJzQ
RnMoL8zzYueHyjn32aDc3dkn0D3c3zks2D88yono0vAU54LglPANuhs8Z9lZv4rN
13arzzfSy3VwyRu2b1S3IHhBlUNhkx47N17ggTad3OwgqAHjjpBt+oALFO7TEP3z
iTA/AGRDkQB8JSYFwEHNWFxWnUKIRzCKs51FiWp+1PpzMRulUW+VWqjXCsuqO2cq
dslM4UUwU1kCQ8AnCMzLX43P1KU8sTE5rOPEcBX2HkIG8BHKPazCZC70pbZjca3Q
lPl0CUc4l6DccytILOuMcevzRbAEzRcRFTrp2r3l3+z5Mv0tdX/yR+xPvnDS1Hrn
tPUdH7FRlt7j71qxjY73Pd2GKBYJm4FL0n9O/6DGtu+dTR9YPXD2c+Ai2O3BWuCP
8FGrFnEbqT1QEegWQKB24FHLY9ZtVkPQWmJNBQ4G5AAfj5JgtDrPYJUs9rCJeljS
7ZLxi0+mzW7qzrg02VckY3nvfrAlPojde1fzo5YMR6s3EhrQOJkENCvIhLiFhVgi
LMQCTjikXGhSgnCE6HJzzMf1XEcTwBdisRkl50S0CnnaH9hP95J8chZ7P7Gik3Nr
8aGF55FHVEI5hzV+qpGbj7Xw5NSdwnKP8AG7se5s1OsM0JBUozNEHDp7CPt3k2Wr
EDoPOlkC91+PKr5mB5EEtgZ1xePhEWCtmze7grcvv2pSqHfl6EFHjkib1i+eVz34
aufjpsFNU9dfmAmKGJAeJX0FiuBr5gu1JrNZcZebi9xXmevdOmNeIK/cnHCXx2vM
Pd1Xmge7x+snmGebz5n+7bF1jZcX94v3K76qeGP5lnJ9z/yepXXlg82D8+tLx+aP
LZ2jn5Y/rbSpvKX8o+KT+d/Evy12+Lw6Tzvb0VYSdumFJFFjMNy5HGkhB8lRGO/t
7BatUgmH7ab6grDF5PVUFVWZivz+oz6q+jRfk6/FJ5fDSGXjyoWH3ifYmtAoBVvz
CbbGw39EGO5XWbbGW/FwoBxbA3BBu5IjvW+pnRaRgmjhAfsR+zF7xi5H7XX2ERB0
gmLs4GEIT0H0B3JhW2dD2Xi5bpw9kCxfms/ZW3J4Tunk7A2xYv/B4TpOnOVRYyAc
sfh9IrtfA0sdi33cLS8UyGJQDV/u4BPYA+Yyp6LEpbETM7ebKwcuvWWt30aXpz4+
fd3v79l/03MzPt7yq68eee6WFVtfvumGrROCo4oqp0/slbqb1n76MKXrH265MPf7
Ize8KJX9/uCBd157/TXOAdfCAVELqcV3EB3WrjX25LxhhHGjcYsxZTxoPGY8bdQT
Y9S4yNhi3JwrOm7MGE1RxMJjhzkiynXSrXDaKjrZpNMXKUTeLG+RU/JB+bisOyif
lhmRY/JRnMlyVg9j4wCc03yccrCmijGVTfyp8D2DalCXpRoAWQ8LgAuaiY+xPNww
BAN8UdcXapoIogR5CPbD1XjOgJYsTrqwMi1BRqxta2uT/37kyHmPnDj/Efe33I6s
l3jnz3Yr4oXh1Tu4s1dvEcm+s7pH9tite/ZYUJSNcC/y+KrtWOTYrBxT5BHITitS
VFmktCgZBb/khG0dUlGWeeBOgnl4QIWbCT0IlYgR2OtHoR3JqOHaKLgGHwWhuOYU
XjEKJMs7sOdHMI5OJ1MmI9g9rsmNBRku/3Qs+GCAc4jh4EPAz/gHKwKO29v4ai5/
9zXYQpcAfcfpG3uINeeH505qIeEQj/UnbZjZWl0kn5BPGP/i+zym/FE5G2M+Qyxu
9IdiRkmKR8I6D0d/PdXFsVJtOlpENxZtKWJF8EzYijYiwkAW2oVfaBawLTWz0C7c
fKqhRCAqn0+3g/HpdmDtF7kwJlHHV2eFoM2u+SNEvVGz+Is2hrD1jN8udPF2IXE7
nH+jOfjtQsJLFRJKIkrT3I7VjQvBEkGOURM3DvH74RcAq+JF9CihXF9lUVKHnfcS
Rjadmw1sPsHsCDOCCIuTeHP8/EInPz+jufmNiUBLIkxREigsaqc37Mzn03KRB2AC
hC3RceJHL9mlZimqO4RrBnYEZ/Tg9sN4rAg8rRyhuTjFsp8NrqaE2+IIUafVE6KI
bU8msZTHl0f5/Ho4p4ffBJnHEXdUi/XRLATmr/M41jxZ+dzc5Q9Fb33riRd2xif1
W/TztgnTr1rVR048MHzy1Al7t+/uKGaPz5/c54FnOh5irTfcMHLTfR0f5vBF+gL4
4qW3aC5F0rnYVrVd/Uz6m+u0dNalA22e1mqBMDeq9GH1qP+4P+OXYwa3ze11hhVg
iNdqstostkI/lBpE4IMDs3HmEg6b3RwrYPp9rTn4gJsFKzAXiBZcMxU6qBnCFmZh
e+aH7ISasfwqzs8i2gKoYtaqelZnzBR/5uFwOB3UgtU9q1P+0362yL/Fn/If9Mt+
RDd4vII2z2KjSJbyfiRBwYh+QoKda4TnuHaMWWb8STl7lD/CiWeeBjFdJOnhPrHn
h5Ob+IAKIcC5D+JSFzmqEGMjFhKxys0db2JyvTqH0WQw6bGGqyagiYeo3eTMTTJf
sF1MgEJilnMeh0umeM1Tyz5tenKkamorm3d58/Ny4qHt9YuGVd7S0cxWX7eg//3v
dIhV7kHQc4sxi1YSoPN2e8TOARf3bHEa4XGWWjOHAqLCqTcFLEN0lxvG6xoMs3Rz
DIZqtY+zj7eHv14d6hzqrfdPUiYZR6uNzkbvaP8CZYFxurrAucA73X899Rh1ivUa
CS5W0zWW+dIMZYZpvsXkC8t6B1iGuzAk5HRIoIEenD5rfuiF4ZEzWjvdBKg+Lfon
AD4PAuBTAeCg5iosqu6GyB29qo/B/Oh+DDyCl1/B1V7AtkJisYFlEBFNgkB/cB+C
TiAX6m6OagX/4ZvXMMMabsnZASPdg1z9xaTmJpQvjSxONp5t/LHgxx1e3DbhcfjG
McoY41RlqlFGCJtYjnWJIGHEdws1+FIBPuiZu37zMfXe/Pe7j6VP7Wlds7p1551r
WvEDKsX3Lk//pePw32+jEWp95+13fv+bt99Ch9ak58j5mEEnIpynavda1C7qZepQ
Va6LpWIsGiu1xPMqPZV5A/IWxTbGDH18fUJX+q4MNRiusUzyTQrNNcyzzFEX+OaF
DsbedX/q/zT4buSE+0TkeCwT88blpJr09JD7qFhlUCeqn5v/npdWzQ4bDBXu5tF5
4eYhtkDhURNVTZqpydRikmNiCmNiOrEi8AX2BGCsTWIi+dIB2G1u5wRnnSjJunwA
nNTifLBNS6mrilU5iwj5796dTqeO4MY5p45wa1x06pwV3PgSp45YlwOLBCrTQBRO
HXrp4kSWEcOp858uHeHTwUICyLHTo+PqZKpYrBIhh8UOhKtetDXXPNPn/tlrj85d
duzmiRu6Op5bfsOLzy9t3pGeo/xy3ahR6zMPP50+f/dVfTrOS88cPvT2H99+6wPO
S++EwvU65tBB3tT6VrioKtO4XC0PxE86zZSXyjqjw2A0GK0uh9FKJAM1i8EnJmPJ
RkTNFMRc1MUKHFkVQ1P/kwVdolV8rzmEVZJ1o2E5XXC8S2SXcIGR7Aq78MqQ4c4h
nf4UgfFgW7UQWY1nlsAYh8cLMQ+dW1SI+uYa2y3YpE0al/Bokqz0ydoZ2GnsuPOp
fnPqrrm234ABfa91R+TEk4sv7/N88ZC6piUd7/FRqIOfZAdGoZvk026WC9wFfYxX
GgcVji+YUbDCeK/xjsLnXC+WvypZjb6g39dtaPn7PiWEeECmVlKTf5JhknGSaZJ5
kmWSda5hrnGuaa55rmWutS3RVmwvThQWF5b2LJxoajBPT0wvWRpfWthS+DPTY5b7
Sx4qf6DbM6ZtlqeLn8HvKP8m4YVjP6vzFHQCWH7OlhR2AqINR1bRhgOiDQdEGw7k
8d24zkjNRENxkcUkB2MJj2zumhfkrrGCQDkf/GigLjAiMDmwPXAkoLMHooGFgWMB
ORrYEGCBX2JuPMAL4QHQoPsxGP4aZSp+lYsRqmJPL5jaTre3mh811eaoprTrpLz5
eSwv7NFD/nLHPJRnvluJi0oOaC7OLuVwV3MUa8qFAc3lr67kl1dwIg0ITYrzesBi
124Aa4Dg/jF+VUB41APCCxCAU79VX1iGS3eFa46WUUBfCMoGkN0ILAA+DgC+EtHy
ZUHxqHz4JJoqD1ayusqWSlbJvRmFRDwzt7k3lh1l7LLjAO8AB7K7TGOFdkHqdtE9
e0yYXFxdRhf5rnL+wJzxVXCMUK7AMaxl51wWsLtyFhjfwqmCdy8ZnlsQSCYXXxLP
x2tgiqFR3anF8BEKXU0sd0N55jvg8JdbFIASphV3icRhDiccqlN1qZKuwBoLEWOJ
PkSVLsgibpzm2+IhUoDtfIZSU4iWFBtNuqQcIlE1j0t0vhW7NpuJnyAoS65atUpI
ihzVccul8eLuOuyKx++ZVWNFgat2ly6jw1Lk8RzCLqxrtd9184obehT97PVHRvTv
XXbfmFt+OdGRsjTPWTHX660I3XHgofFzXr/lyIf0svC8JTMGXRb3F1VesWr4kBtL
osnLb57lHz1pdK94OM9lKqzqv2LSxM1Xv8TptDDzT1amPIIdHX/aQ0zAwXiiGvYB
/EoAWrBJEu52E5WIV8WeCROEhGS2qwWkgFqdRRaa0eOHLuqb9IsQ5boRIcqQ0Vv0
Kf1B/VH8HgE3vbkKCICLBQH8UywVoYRr/qLke4FpKDknsAPAaS5lIP4F58J5Vn/R
72VzsS7cc8fMS01DcHsw+lPQxNQTZ7jBzYNiOJN3VFWpb3IDKZks8nG7Ouy9BUBV
W9cuvCnpUhqEjUh3dzco3d0loTRIiBLSItINKtIo3dLdJSAlIN0ISF4WyHs8R8/7
8b33/N9////y4NxrrbHGmPOZc645XWONPdfufXYoTVDVQMf5nqlzYEq5SHE+avJR
c5d2hVbry5bwuEEP5kSD/iHF46Md3mVuD7Zsgjh0fcmnUbfna+YlxFeIBYOC0dnu
BJZVDsplyjxQlnFy6BNFRKbL8ymvNHGOI8AhU5ij3Tos/YKHofFedqGej9x0dENs
NnLK7ak7oqlvj7e7tQwJxylfFvyht/mz7QKeBWF2upk0WPcBdoI4YRQLwlxoWFnY
kdSpSD2qaPg2QemwaF5ijn2+3ejNd5ul8mL6QwRzAioPwUp4dWNwdkqWQZxx2kyM
CLSfniNrUNwm3PffhH/0aMkzs+IF2O3zskXBoYj3B/xXynGD1nPUizxB6FR5lvDo
WbVeSUbTfNkflNFqwb7xeSU44VCnfrL7yI9t1TI1N5sfJBGmxI51hCyLBZeX2IwZ
WkXR4/SmxYxPvt9OXBMWCx7Jjxz82JMOrXg3oWElekG1TBkjyQBM9ixk6Z4IIx5G
2yuhEA8p0S3FlR4OpIGpvhBqyBRVV4pXGBwW9+JrNG+ziuGwDN5IJC7+kpXA8ZQ4
kETjSJJZbCtLEp4pPmEgaAMXjZ4p3v31uEZfUWzDixHaN68bohkGXxC+bW9F63du
eMeOQ4Zj2hdjGaIfsnnDlrcqcdystNa5yhxZu15F2mlxGG8Il4gcFX+duUokken4
ZWXqpL5r+FHTDvr3tMUHWzGLPJyGVM3L0UcND6iI4RXp++FSiVu07VyzMJOlHOhQ
ILlP4T0dnvIl9K644d0/msdL3jOgcY6Ri99/91zhLQUWM45eY7pkEHLf9Oz03Ywp
fXQ3t0IdMmhhDNz71mm90M2Uzwzq0ggwwuGpAuHUexbvi3krU2A+f0zPYBZ7g+hm
Paq/t6P5w1gGGDQPYl/zwo9Hg0Qcq3c2qtLepzEu8Ds8hVX0UntAJ0bDYeEMdxRK
DI8sJ2CbVfjUKQBp7BuXMBwat4BnWOJp1i1RNZdTV9kDLs7eR83ZPoZRBUXq9C9Q
0LPyQNzxtjpY3LtTzST5hHdKZR3NtWZxcvcasB5KqIjAbnZOheB0y3t9s8pnVBIo
tG1J8bcLF0795JvdbDbGiKeCiIMFOfgeAruGfvFJt8C+4IegLogMu/38gxP9b7wn
/VhH4WNkL91pZZCI5ZLjIlvfkDm+mcFrrvrUjhhGMWBRPa4Gd0wDwm4z78TpzFOp
d2mM104a0vHHUmnnCux9g4gLJQPDD53NjN/J9kyRlK41BxVf6CvPJynRAybhPpX7
rguHOAejNySF7WM9ovXfuSS7P5+Rmmfd7e1y+TTD2e6StkZ2rFBPOK5zaD1f4zAf
TGoiDk/5HmtMaqWxC8HJpq/dpUq/aFp/kbh92556zKJpi3gkZ+zBYc5R9ZrwjOT3
18c2Xczldk35uPWBye5hWXdK/D/T2ZqiWAmTxWk73vQTtKHoGwu0/KyXv0hKXYSh
vzrjnoM9r6Cip4sLuxGYZR3VZeR4955ks5pLoflLw2pDH8OE+lmG1o+ifLdH/L8/
eldAzIfZyrw/I5yXOKU7pbtL/7qMFP0gTTWILByilp9scBrkSRTwnIjcPpK6MIas
gnY3Vtjm+eJtGVOF3gpMUZt6Hmx1K2vq4tiPwS9YcD+XxjdDzVHAcD/fkRnRc1Kz
VOnlJd8vrU0eJhkVny/cjlYIP8y2eHNfpRqJWn1scTuWkq1OBDtWJTY6IyG4P2j/
tp9PSMQnvcbujkyhOG9xBchHvDWBiQ4JPnIiT1T0PsU0iXmKzxgcPbrzYOd0Ty2Z
YFBwGHb12NMbchEdvuEW6o0v5mZUXCZCcawm/u+PP90TC7OMSbN6Hcfr21M/Y2Ca
88mfiUWZ98a0gG9H723X6mmsGtrE0BfJVOh3jVoIJlNCjaUTKObi1Hc38Fd9qZ4/
fqZ522rQacbJkrQKd7LYl1y7sqwUv6aLPNfOKGSdpXEW5xQGAd0UWjNhcrVqvAtP
IQQacnL6S+/ASNLtbleZMpVinOXDpynP1e5GyULflWy8eTt2osRJM0GryKr7K2HU
6kSi9VhJzg4UQ7S4LMeEwbADz9GuPtv2kbhlYy6iONhv6/3bLWSO+y88osKFXchK
bvOL46N8SuAq6HrD+b4uWd3AMSXGEJca94hlgR9pnoofDgrJGf5tRX/IqfBHmL6n
D+/7P650r4Dn307VpzbNfq1Z1MZsaW7rmuNh+r7sk4Llqvmi+ar+4wZ9ukeRpXR7
bBz4WsiJnF2cuZyJ+A7tOexc1raTs2X95V3vJ8omHKIO9ftVtj0ckgzzDqn7Jz+f
Fju+4y9lnpYgp3TV/vpQohj1w6QXadjHxrXAE4hHXMJzrsRMKLWWMhI+T8bmqGxj
P3PUylpx0Iia3LpHcKvuKw1WQUgNP3yWvgo6H5rJvu4Nh4oVHMTO8a4mi69c6V+N
whNg4ztGZGBXivshFYgg+0I7QyKxCuwLgvIlSGhxEeuLMyG4qdGMnzwu9DGgfrKD
U4lSnYRQ522TvpVlKgO9wXw/UBbmeIkSQv8Z5iuh3DC7VoOpuCwMkarNJJpp7j2v
rqKiG3qFyNGzsGSrJFhHeiWcdi9JyBpkd/dwP8fwr68pG1ItKD+Tyw6v4GENeWpp
5AHldIy+UgKJUhZQti4ggjZ35zM4cb87vgHxRFZz/taoCJrPpsut8I5sow++bPLP
JAwtS7KTowujD/xy9GKVpF75vjRDF4bpFYMODri7Pz8lWPmNTIdnoVYxRcl2I5Vz
sVGxNlynEOy82RMokTqpGR4HFdexZqK+9YF722T30KOM337n43shg2azh4/XNeYL
4kaXPbTXB9P7/TQQRybmVIvDZejE9yztymVteC3HI9trJvMSs7vsdhfBNSMfHYzN
BgNBHRuCrTi3Q0g/lPLzueJhcnkFQT+4bYMV8Whx4Rkbi6pK2BZTXkC5Eb2CeuQg
p3tTbv9LrboX5ZLIgwOyC2Gu2Z69WJpI4uZaZVzpOpmyGL5zJ1ZjhF1Sn7kW9Ngq
3XHutlJaSRqrH0regX/RsMuljli+H6BCe6dHwcZl1CZD21DyqKKRC69cbyGYhx68
0iDj6csbH8ADq1Tn/DXVRc8jNjnPWnr70Vvi7Mci+Y1RT7ogk9RWZjsNVAesgwoZ
nGqZ1ywfmMJAqFbXKjXz0+Hjb/I43Fo8fUtPvpCOXqxPBbOXG11dTz3GqiMMgfJ9
HuwaYOhfJBOX1pKyww93As/o9Ewzj/6BPIrQ6epj7ph+qkSertvrGk/3BKjwu1uJ
aSpmoOp9NTvvTY3At3tR8sTg4jrOBsZF6FA+zDhcOxjP2jEkTRaidirHjj3ArXuW
kqN7EvT+dI3fGHIM8kksA3qvAHoTi4ijKTLO89PnfmfX7DcXX0O+IgYSstrH/Hfe
CgTzk24ZiGF8vJ8Ek1YFLditvjE7LyilC5Iuu5O58YYO0qhxWBsJMQqti4xqMObL
4lNu9xmpHD7VE8TocWnPX19xeP62t/PXGnJysHP+Swq8LBDYobDSN5RVBKsY29qZ
21iDGRnoGFnomMFaFEIO5pZGYEYOEUYGTi1KsLyDvq29K1hOREzYxtre2Nme8l9Z
AW/5O89KhIuJgYmRgYWJk5GFkYmJQYOBgfzs3780f34XnZytjZGDobEt8AsT52+j
Ez4jbX9GQUTf3hh8nueZ8L6N0c/Hf7zXztnW2ASBAczMisDwL4DZWFmZWcEm4AsZ
CxvwAsGLM9Y/ZAzM7KwMf5ExMrJz/lV2BuC1gn+WMbMDbxT8i4yDleXX/H6RMbCy
/CrjYAJ+Q+VPMia2M/Ev+XEys/9Vj5GJ4Ze6sTCw/SpjZPyNjPWvZZz12W/yY2Jl
/KuMleXXNmVl+bX9OJgYWH+Vsf21Tc/a6pf8GBk52H+RMTEz/LX9GJlY2f/Kj+nM
+K9lMDGyAK+1/IuM/Ze6MbGeDZC/ythY2H6xZWNn+quMhY2N81cZ8JrHX2ScP5Vr
b6tvbmlsez4gFM1dz65zVjC9go2NPZjpx6iQtDaxAV+81JFeUgSsCebhYDdg5tRn
NGFnYebQZzdmYDHkZGE34mBh0mdmNWQwYeBD+K9VLl6TaWd/NqTPBxILGycDBwIp
qaisGAI8SA4EAilbP9Q3tzU2AtuD7Y3t7ME2JmBSsLAIC4uljbDI2di2tAFT2Buf
8bcytqWmpAML21g9PKuKEZiZjpEDTA1mpeM8++Q8O6BjZKcDgxBANBCgP+H0DNCQ
F9s/n/m/E0AzXLYR9FniAqGdfaKDTkFQIAjQ4YXGaSmI5sd5+H9ZXgD9R/oruEFw
Z59AxsCW59we4Swhgi5y/Dsg/TgPB3Y72yP8b1j80+AF4Z3lDAnCvajQOQAJAOB8
Mkji/PxF+lnrUuNn/Gz5O/CBbpyfhzhr9yXQZd0vJBclQIEuegDmLAG6sKCLtgV6
5LJlgbZAPksoZwn1LF30JQh08yzdOksYZwnzLGGdJeyzhAO6YA6wwz9LBGfp9lni
B4FBFyUCJZ9fHjcA2wv+wDlAJnCev5K+gYOlvi3Y1tjOwdLe7ifbfwHuQh+wBfID
IHCR6++VAaUrKwPHV1YGGvDKykBLX1kZ6JIrKwN992+VgUMggc+6DOjky3ShDDS7
qJ29udX5rQtYztLG/m8KAi6O3xSEAAaDflUGrqKflRHB/0b5clheSflyjF5JGbiA
r6wMXOlXVgaGxJWVgUa+sjIwyK6sDIzGKysDw/bKysAYvbIyMBFcWRmYMa6sDEwt
V1YG5qArKwOT1ZWVgVntysrA9HdlZWCevLIyMKH+RlkMJHE2wdyAgwbpARfxNa5x
jf9fABjef5oEfgCYBP4T6J7dtuiCgFuMv575HdY9/0/dXrYJUBfgRgzYAvhx6wTo
/UcJyGPgPKeY83wBvD3/v/B8ogWdz8LnCTibDnIH/dE/wPbkLBPgP3A5sKO+pYPx
mYt57n1S/lD5z6F0864nHfEk/1n+pyenIHSgYAB/ULi8VC4p2INtgXu6ywz+91G7
zW6ol/31BwWI31AA/lv6mYIC2O6Rg/6ZE36Zxf8u8FjChMIWon5QgPwNhct0SUHE
3MTE2NbY2tAYbGBs72RsbA22Mta3trvM8b8PqDyajbapHxSgfkMBuDJ+pnDPxsnY
FmxoY21ibnROxNLcytz+Mrv/AK9wkVU0+DdqLihA/4YC4G78TEH54cN/loIUio4g
qQ9I4IICzG8oACPxZwpi//TlSPWx1UoogeQHhRu/oQC4Rr8dlGL/0KDcrroV8fab
xI9rAfZfFDL+9YwDOHOpfUnh8vhyRgFwNYvL2z4AV7MAqn+Jq1lcswJwNYtrVgCu
ZnHNCsDVLK5ZAbiaxTUrAFezuGYF4GoW16wAXM3imhWAq1lcswJwNYv/aVbIYMAn
Ap4iA1Kg9Mt0F3TxFJ/iLHH8OAbkgAwA8JhaxNCelp4W7GhHB1ZV8oSCh4CChICF
uKgD8HnpwgP7QP6Ah3RZw2kBzicAd2jQ7Hkdpp/Ag0RBv41iC4uwcYKNnR/aGtud
f+HlTGRk42BgaQy+DGeDH9rYmdubOxqDDY0tLe1Avw9dw0D+uWH+bwbQDJdtBPjO
F6Hr9TMpNOgqoeszzXMP86/gPtcG8EfY+jJy9He4DBb9Eba+qsU/Dd4fwyn5/IEX
sA+k65Ay6L+hDBxfWflyrrqS8v9BIWWgc4HthfJ1SPkCcNch5Z8Adx1S/glw1yHl
a1zjGv/zAIb3nyaBHwAmgf8E1yHlf5+APC5Cyr93SP+K8+n3B65mcTl1A7iaxc/9
fzWLa1YArmZxzQrA1SyuWQG4msU1KwBXs7hmBeBqFtesAFzN4poVgKtZXLMCcDWL
a1YArmbxP83qj7AQYAWUDiTAL7gL+k/CQgh/CgshdawJ+ia3/TYsxCkw/QTgDg2C
QoX7IQPAdM7m7/D/eOjoetXjHwCa4ferHq8WOgKezf4+dAR0OJAx8MT5/5vho4tV
j1QXFToH9Y8tcP7Pqx5/1rrU+Bk/W/4Of6x6hL4OUQFKV1YGjq+sfDlvXkn5OkT1
b5SvQ1T/Atx1iOonwF2HqH4C3HWI6hrX+L8KwPD+0yTwA8Ak8J/gOkT17xOQx3+6
6hGQ/LLA6p9a9XjpG5/l/29WPf5M4R9f9fiVsBj29svdHxT+btXjzxT+8VWPH+GL
67mmu39Q+LtVjz9T+MdXPbIwn6Ff7uMFhb9b9fgzhX981aNt+nM1GgjTHxT+btXj
zxT+8VWPBz3KEbMlEgIXFP5u1ePPFP7xVY/q9U74mcuMPyj83arH3w7Kf2rV4yBd
OUV/y+sfl+P1qserWlyzAnA1i2tWAK5mcc0KwNUsrlkBuJrFNSsAV7O4ZgXgahbX
rABczeKaFYCrWVyzAnA1i59Z/b8X3r5c9Qjz06pHXtBvQ9dyIozg+2KS/3HI+nq1
4x8AmuH3qx1hQFcJWf93VjsCekBuf4fLUM4f4eqrWvzTuF7t+FtlQOnKysDxlZUv
56grKf8fFEoGOhbYXihfh5IvAHcdSv4JcNeh5J8Adx1KvsY1rvE/D2B4/2kS+AFg
EvhPcB1K/vcJyON6teNVLK5ZAbiaxTUrAFezuGYF4GoW16wAXM3imhWAq1lcswJw
NYtrVgCuZnHNCsDVLK5ZAbiaxc+s/ggHAc9cgdKB9E+Fg8h6NR4uGq7+Nhx0udoR
BqQHIjgTvvrpHAAgZvFzbOff1eifBATw6BZC72wP4bzOF+0JBQF3vqWDwDnfQkIA
S89AIFgIqPOWQ4KEOLME9hDPOwSwFEYFgzrOc7xskYst0KKXLQ0BAp/Lfgegwhd9
9d9aD4pqUAkCkcqJiNEy0jEjkDbMbc0tp28n9zQ0IVz+9C3wA573jK1N7c3ArBc/
1ilmbmlvbHu2tdS3NxYxNrQxMr74zc3z3+Z1hljVlA4lKEGv3suberTLkObRBQWH
1tAGBf+iwZdsg7iLeEQtMli7eWgUZUU3aT0LtnVNf28nxB4NUvKjo1WBmnaja75a
4zGfG1Y1qoNZBVlhs/unpLox+vr56bGNL3OKt9aShG4lrnn1DDo4v0ryJoT+UtB0
6rdBVpnLkDIIHyzjugkrt79EKbMW0SYM6iFEYVJPiu5ad4hHeRrhdqtfU+aUcGA/
gpboaP/YcH+WIHZoojglo0LbkwM5hdNn29D5EV/4s+3ljT2L7ZKK/Bwnq09uyx+d
UI76vfJuOx++ET51BH+GiTmp1ybt3qmoDmVO9ChFPIWb5/eZTHj/1qj0a5tgQO5d
UeXIL592U7jvvYaL29Y2iyWzvNN+anviUZmlVA3reevRBFeeZHY60W3q1GdW6Cvw
K6phx+OLPSjH8EIYYEzpVzO+vYSwvZ1Q2WZwqwxKLMg8gxxGrCJZ7Oa3bgha+e4l
3x9MRVylnq059bSwG2LuJCFq/DaYhws9QJkWFWtX4SQ2X93KndXBPamcNGiSWbO4
nvUNHlET3XDIxbSotbI/Vda+xPRs91H9a6e3UwobrbPpxuvZWlVfEvAeT/ZyZz3K
doe10oCLs7A5OMSzUll2CsoaZSmeeMYWrCAfVzCRUTFrOEq3GCZsE1ZU0hK7Grc+
FUPkELM7RH349SVdOHZkcoapClJluPt2mumdqMMe3v5isXF2h5KGavVazhS+b32h
E61B47bbqCJJpEn31vlc59s+H0H1fu2rhhcfcGd2NRpeqPa3yyVQ7Xexc2cSPSUb
6ej1ISiei7f8jmGpX2vgu0HKKGxiy0CeUrar0fWqcIVMYiKhUJ4gLNfpcKMo4GQL
s8vRL4X3G4/kOspmpRMH4Zj1QqYqfaD4OtdKaAXEMngO8inP4rdnlYYvKaeEnX0U
GR4g2hJ6WyJbIEYMYiXWilEUyFtpmgzNpmUhD9hEBuG0WOGHwdCQbCuhzFIEexkb
Yd15YtkuyAbNMlvnD9mSTvaBeOrO3NtF/+CB24+Upox31tD82SGjeu+3mCQNyU4z
lfuPEFSIaOslqw5szPX6L2uvk5TXBQ6M7Rbi69ViKOupYdKahRy8yFCcOlMdJfzM
I6h9vpc4UOeD6+XFR06Fjb5VhwH3qI1nFUUIMsb2poaY7wyHOcx8L+XXnhfm0yK1
3nyqX+IeCb+SoEutDcLvq9hUZr07/7JmBA8jXuDueidHKUJM/wBhvBpsJZKM0b1n
t6gfrKK/YcqQYrr5fRMLYsO+bp4zswffh3vpeTRtsp8UsfWNp+a1w6bot2CN06Cf
2925bQ3mO3n3Cqn/3fK7Dn1zxWHPMdR0qKWsI9uavE0bBYtGA0GavHfyYMwAfvE3
Kjc2tsjSxloMMZ/xeR3ATRxzUhWZ4CMZ8u1C0lQIR6JuClgZkRYFHw7CqFukr6O5
CLzGTiZhGUg3HBcutJjt+LxO9yD5cNxjcjC9B2kGb+FtGeK8TWGx1CJ1xj32zQZq
H5Pw0cHsNh8p7/7Sm2mYAu9H2guPRWOKWwwmdRn86mbVEQqVuUSaUgWzjxqWYNrw
6vOX676yvye7nSWEfjivW73TRmfRm7Fb8Nq1JUM9FPHzx+cZrjxhx0HQ3Uqe6ku3
39RpVaOPUJEgbt1FZF3/HppJxPVdnILzgfo3ZZ0Gp0GnZv+lsfdLgbw3yIzr0veL
WmQlOH2WMNFUYLC8+hYS15BpXKozPlg3HDjcKUL88NIeb2Rs2HxgZcNhlH0mtfOt
ZpEMmYfGba9dWo45rkWEoENGNdyi59/omIxR6Lb6NFFPH4HxHq9I8YiFboxOkrto
GtTut5bmVksIyHOtQZ3Yz5hOSZhW32RhOhH98FWRHc9TPqPZI3XA442CqJsiaQPW
O+4YBWNSN5jsVsdnCvTRh4vmJU95lb2oxDlSbGOrysUKStAgx/nWB8JbVDItSLO4
Qo2Scgi+KoTvpj7WUpTlsoubDtj/zNOJ4aCqICPKXWcw+119tGw2rKLvVYUyn6qV
GJ8pfn/bbVgNlvQ0hg4umYTsGh6xO7wkIXUsA2puPm9FJrNkKlw/jK+oLikZycbe
vRt0QCXnpo6G3uSHEtvaOtMUfOM1ncSdQPmX6y7h5nJwOEUubH7U7fU0UlECtDrQ
818ILILFwroXNtXezq8z+DMThCCu6ptbpA3Td0frpgzS008cEBqpqxcJRpKSVG8e
oXlFl6bAp1c57jz6yvyBavzxk3eplOi4gX3Lb2BdsndDLAqJtUnKFvDvKnc1BMTJ
232SdZvBieD3HIeyRQjPtBsLFDHS9QpbKDGeUuxCW1bSzSBfOdieT5foDeXWSt3A
5hfNKr0nkrxtj29AvPpEK1U/CnWYfTabdbFretY1xjjdiQRZlxhegX1u1Bg5SebW
Hp8ocncSk3Lo0sQdDuXxD4z+6Ope/r42j9YpTeXrJb1yJTy7LEpHMVizu1YK+sej
m5vNcG08E8tdN2cpDQKJn++r3SDk+zZvRkvXCWYODsN90gNZK0qi9nDb1a9cGL9r
j8RuwVG7wgblXaU+RY1AkflSBRW/UzdB9TsHbsf+LXNULZAmrC5Ea5UNwq5iUybm
0AaVzvJB24wjj3ZDyrBjDnV1aWhmaMtEUSjbTkHcvUpSk/6szgfwTKXWNwSKw0td
XkurYXsnfMaO63iqjw3epibK0r5h9Jnppi4YVln45MvasKIhpkNK7iz20gqfTtpb
Y6pRoWUWFffyD7PR+RNaeWE0ODR3KzWIk82+pTTf4C/6VJ+yGJrPjRXwQVo0zkSB
MrZAjWnFsS1dKpRLSB/XumDEA6d5CJPtUFXRmiXMjG9MLxJPtnsz9unYvOc42p22
Ib9UeXHh4CaCGrTgkft0zGKsZV98zYeJ78SEIctQd7yDdiSPxs8M8ottI294qc+d
XKdFg5aaioxfOrTwXuE2Pmof7ovEVq00cuI8sx3QSDkcczAhh2olVyRFN4vr1lNn
oWKxUBZoE3xeXK447iGaGKsdo4UHeLwC7IyBwYnm1GTy9GyubztfIiUEE5YSVtxy
SYNtRdMM60THYizszPeTvvnSCbtKIl28/hPhQpsBiVXzzLzoZEv+iMs7DM1YtPZP
o51y9j7zm2W2Q57oJhgy+z46N7y3dZoK6+EdRTG7sboiDWgIZHx1tw23E3So11od
ZGx8P5nQNXq0rj28Z9IPfR9TqA+0+KyYRY0wEo4KGYUNv89mImDzq19ntoRPwScN
Yl4hmeAa0lEu4c146gSv6BxdkS+cid2894RlFwsLjFGHDKToAzuIUEtzIQ/z+d5X
luwT72NRzlY5lM5VwcC42CTQuMieRjHdkNBMV52oyGqH3nO4/X43J0TtVEV84aNM
h2YRl8F99QRDbXXcRyWv0G0+Lj0v0nAQ+Szv7mtFNehwK8SsLvv4AYjmlFlD6Qiy
d5GR3IsQ+uUDpdF74TXIpS/9BGo8Utv6vqI/qthq627g1riBu2l76/4QiIfCry0K
TZKdGvoOem2jjS/1Ogz7NsFb9RgW9bqkWCv4WIk0J5m+efGGaTEZt/J+uu+HHFOf
Ys13+AnHmeUmbhKVPU+vbnruMoa1/5Xx496xI8Fx+v5XyY/s/LENy/AexoQ33Lbz
jN1qDCCOtpADMyrXwqKnTpznEMvn+VLVn5JBlXzJejDrRMsh7DhThiuPWI1o5ztZ
jGNTF+4QwE7HIHx0zKVafhpA8F0lvrFjUaPIcf3pJIVuRelUW67Owxu1mFojq4hd
G+3Yoq39ZGVux3cM4d3dmjzKEMDJ2i+fNLrubCdIkei9l89rzogR44UecOTVnvBP
vfkxoaCV62RihYNxhJMxfvXxbANug2Hl2otZ1dtJ5Kxe2Y3+7vLgQPpF+mIKFv4W
f/HAW0+e5GoyicF88EcM63kOfs70Sen7sKT3oTvWuMh+mUUuMyltZOV3zZUMzwNN
/p4pCT8175l8ovsnR4+5KY7lEzMWsEP5PE52cTftbzEa9D8azcxj22SYKTgmwIQ9
ahxz/uAaZLipt5vgtDHDnmSQUAvfgM3f+P2k93C/CeWBOu6DnT1wwTdJdRuzlmxx
e9HjFGVk5jmzpcBDm4CsdRjVgwwmqh6f3Bw+3lXk9hJ9RuzVQr4V7iwmh427x/V0
ig5FZc11r0cP7mL0QkYQfoY+LWFoY0OaiJCeLaZfKazszKDNDXd0DW+AlKy4+VLN
b1NoN6Z6/+kK+66c8XFtsLn4PqQfJvfDt5Je1jNoXY0f9FjpPmBoBMR1d1Mv1X/Q
02uOxmwqjX+PeRek/katryugHvq1dh0xZMSMpCIxyq3nRaYQiZRcTqg7LoEw8hJ8
VgyWaMlxhrqvdOitXcb8gqSR+T9ICCzVEdzUixxuTaJv9Tbbsav8sjVSanFIW1f/
PU7q5KZD78IbS/wRko9uL3W/Vd7sL1Ocxmg9jY2nqzhAilKHx16GyZs8gtHftLBS
d2GU/tApS21PAOEtwFYRG46vPTPYsUaob5M4hC6f/SzjAfcRrk/RVIKv5a3aofA7
oyyyurnP58a5ZvhMnjs+9XHqnF/EYlCdX+Q8ieXhrdeNSDfdz9qynxJ3GZ5b/I49
NLeYhqtCVZ9KN7tIkrsC3YW77eJ6gswfY9gklMgXq8/K3NXStezzEld6SUWsgmeW
U5LSRYsy1rjJhLPgnhwHtaWkVYZaWYHmk0WOwIIqndfKpkPURTcfR6tqvM3SF2cI
S8R7ezfzKSUuktjcB91MJBfapJsW+1ssUd8Zb02w33tmKGRZRsNsLvfFWSrYvYKY
1kPXFNd3MDPZTw0G6rMZK5Q5W3J8ZHaqu66qUpbOQiEuqQCTuBjMnXTYrNDFYZL7
aWt2LYump1CyVkkOCMbWRj/8wrM9wJ0EfEhgy8zKyX4pY/rJ1VRyeWgMppfTNz3/
tDW2tgczX7idCsZ2Ng62hsZ2YLYLgbCNtf3ZeTsw4KqeHd83NjLXF7JxBmsynAmY
Gc6TNsKZa/qjHMDushw5WxtDRWN7sObZrojYWbnGzvZgbSBTSxtbxYf6hsZgQE3Y
jhHM/qM4OyYwx+UuM5gT2D3LHEwv6mwvrmh/5gufW4ifnWP8QVncjgXM+IOd+Jk5
4w8PWvwsV8aLWgAZiJ1V5KLySmc6jBc6Skpn+QAtc75/pg9U6lz/jwqdl/PnlvuD
DL2hPpiBjoOFnfFni5/d+r+xYP1Z/7K//k7/T5n/3MC/U2b4WRlo1kvlHw8YGH+0
r8xZtvSCwFMG63NTEWNHc0NjcVt9l//66cMbVVi18GE8vlOJOqlPimKfWpiSV3Bj
IIxQBZUMbkrgEN94+qSUohFhiBaFAJM2QKFQA52CbuBLsrXccqmcNMwbrKzSfNdu
+OSe3bI9vu7OU4KTPTdTt2XeSU+QgHZLhMSHRyCBEA5dvJvtMokx8XWvx6EQBLDf
QYont83NSX7q7UV/iIA2HwCzwLu59wFRT8K2HmKV9dFKzS6FmyAhahcXjCY6f2gU
FOgrMignlDzsK1SyGcTcV8QtUjg/oewITCJ80CMqEAJV2oMUnGhvuAbIjOfNSGG2
gdHEn+MJ6PpHemNwaTvvYxufPhs06z3dbm+NJK7o7YZmi6jMLn247+i9G7VZ5gVX
IewW3YwcgN8YiijiH4Z2CPUkTnIrvVmI4MYmj7oKJL7B4+fL/W9q4dEOhdw0KRBF
nfFA3jLvGfjgDQyf1zds30kD73qrtbQjSnh9uvEFL+XJsy1oQzEtjDm7L8S+B8/T
+z6rsUxigfri6OGQ8MLCF9XLpltuMFOc0uWBUVrn2LARoV4kyGGPRLQiB/p+QviC
/XQFjYVoTZjxxax4Gq9+0k2KrhAR12Pi3Juzrcc+7lKq1QyEcx24oEz1ahbCHJ9i
+Zl+0VqC58+I6TCkhMMIDqR5iVsjt5GavA9kqAJFq4WJzGshH0EGEH9pVMhloYA2
wKHWoJZoKBUA2dby7EfBNiTDMggSonlBcraBtF5A4d/S0EPVhIsn9b2PYDrrRUPR
/aR0b4ZjKQ3TLBg6ZPapPQczfi5+OBMEUS6Rut9uiw/yt55q9y13l7QDgpRq0Eye
F1IIYi2IAFuIBcq+ndSnp5rgE+oTBVyC9ifOlVimLSSmaLQlDg03WEIKd0ItWn2o
9221SZZfRJEUwwjENSbjhBCPzSaGl98NjEeIw8YVPHhBU8ZGGS8PTTBra1NmeW+Z
vDvM5pioqMuvOGTPw62yycANr4maaC0emRcjtIkcVWMbZTSBtfxAkWUObxinxfLu
y0xlxnjOItvAsPUOhUUt9PW2pdrTF0WyI3j9awzENvIzLsSmCKc2lU/KKYYpVSlR
KdghblV7ptgrHIDLpctgk7iJVv0Jm2ExHjcQoB9RP+ULYdTzVucpg567g89HQe9Z
sq3YJbb7vR0Fh3g4kKM9cv0pTiQUflu2QOIw2rskxO0w2DTaZzyinx8+CcJNqkCn
nZEReCyZRajnmMPjAMGwPBjb3V7UkjYuyfZmQs6cXhI7j/GFxNeBSCTEu0li8oTQ
7SS6Yk8VHg8RD4EeoGYlfov/NtWPNEQ7ZJMtM0THseWtJktAGnKrUwSxFyI6f1go
nix27l2imU93CdHwfaP9Fs7YlocN7BMUaWGh39Pi8bqPHxG2zbBi0bJ40ijGpJE7
8OzJuTUz3zBe8SwwcxMjV/EOW2mRvV0fP92QzGiJS4fEBmUYXdccM40axlkfhF7b
45OWgvRADGzY1+wcFP/ICJZr/bm+ocO0Iqa0b5rhPYETeGLU11uxjbe/7eXxMZE7
+1PFmh1l1C1sGIWY4WXAG3I1f6EybfEOjwCx+n+ENPPDaMJMcGTMJu2At5MjFVOG
Y7oZR9o9zR8P3Rdtf4czn0kUgqyVTFviVD4oM4LdTS4HL2MC5TURwTdSKEknpeam
xyAnIn/sTLNTy+P9cOJkV4WcDEGlB98nbNffeQ3IWTDoKSS8iOfywbvxHjY2gp7C
2wkVBGlLKqog78uQ1OpbQgARTvKVc5Q5QV1mY9l37Z4ZCqjbcNaJ+F76M/JwrKAW
iZ1UEKlzUh/kwUaWBUrNEEoPNfsUTE2M4AYKGswXQaZoqGO0untS+kbSH5nkUKhq
8fLRLWG4awnlYPE+6j9EKnzaPwX7EF4LJmGK7ihx5ym5HloldD2Oby8D11v/RUOy
aFITP07DtWh6LG9RvfdqTJG+xnoG93wj9JL0Iz5xWVIXI2bVVzfGvu//BLOC5wi7
XHvwnj+/hMMra0qjFN3aR7Z2/BEbYUjzTMEmkhufTlDUdNZGpzOyTij7l/RNaWfy
iWD+Wj84AYpbXN6U0wKltyBEMMKEXt9SMGCUF1RCZxWByoZYbUBOjcMBT7xQUgg3
eonCEJhiBNlKMh8e2Boxq2JLNCKRSGrzgncW/D1RKB1HYYUiEQPFmIz02YcnCjIZ
qQMKIQpdtQjj0i6SbxQc9Dw+6028zIgZ8BmIGFgdeDagOPBgwG+AGC/4rWxB2vee
VDMtDb6c+GIfFVluyQqZ5TdVKnIqDPIPVeBUJOTRqF9RKVGuqHKkPNSeDqvLT41N
fZOabvDqju57iUdFXwgbsRqpA6oC6qWWpIak+KQ2pWKk2l+xUbNSJCiWp+9oqauP
3BsR5hRTf12p5FKwRTy33cbbZqPEomSpDKmkoGxElaW0mxmvUJa2FS+Trtl7vEi5
43ZA5Xr7GOkY4phVOHy6ZYphP4g0yEKMZIZrJiMzNfMNlaZDiMV7i4gl9EHqTCiL
AAsVCwgLraJGi0GLTouSAd8B1sGEgbQBuwHVzHXVmuSJdMH+/D64vqkHr8xXhjjS
NuXCe1iGkXpmzT3elolvx5vkYSm3awSmRWQoZ3wLHjLOEbRCXjUf9R/1GR0cbS6q
cIC7TX07RKa4yyKhnkuby8Yh2H6kHHIcsxy5fNhBd/F+3/bwrQXlhdsDywOPs7oH
UPu6+3SzPO+dVkOY6z1AM8z/qOdXy/nMS1IjvJJsk0z5HhfPIrnw554hhqGHKdPW
9Sj1xCSGaWgk/r1YacxiUE1cTSdNMU34QbI4e3Fmsfuxz++xRcezuHQMmHyIGeno
7CjoEFQU7pdTjFmk629/W28yZAJv8sYEtnMtjjqmIi49zobBhpmokOF9tL68waOP
X8ilRaWdpFPmyNod21VVhlQkVdpzQtS/qS+r22UH5qCqTRakjO2PdJRkvC/jjOEa
cbcdml0Nzxv9UkxXLDRmMUbtWJqQldBiXTHO+jigyq/qU3XTSeSzAKixlI/TT4RD
00IMvQ0zZhib0xVp3r6+p879xr3tcSQiNb7H+BqXOYcPZwRXEcfxtOVyh12uYzVn
BB+r89LLjPuKSfcL4siiiw1HrbDvR+HStWuPap3YO9hFlLOV7laol74ps7KrmMud
I1yt7juuhG00LG++GaoSyp6Ym/g90Y/Xc892o21rdH1w3mqVdmNi5rinucNvuaA9
fSxqMe7rYYRNSVIG0XBe07qpp51ntWfOKcmukSNZReKxPdeDcvuD3sU8SB4oLJh4
hLuQwpDUkPSw5tCk0FbIrmiWWPHobmBnhgZSI/2WDDkpM+eF0R5NAhKUUMVmXCQ7
RE0MRzYtUh46twf73ejF6H3PI3H3g/Jxl00/BxYGYYgTBkLKx7/7Jr+XlpM2L+5J
JBzsH5IR8p11iLL4bjGvDLO19eeT0qjN/hnV5sn7+ZIvSAtJM8nekg2RVksh3NOI
GuC1a+sQZaYnxb8b+DJOwYzSn7KIUrjgqYlV/GDc0kuNxFHWMVfH6RVEO6SvRt2c
fKoOdE5rYSxSGgqjJ4VOnymskZ3MCE0nil2eVYImyCZuVfN7QtXoTpGokTu/Wguv
pquiryc3dBer6ZFVIyVAg3leHJBo7Guy1uEWgRlRxL4s7KiwW0vgE18Yb/Lel0Pa
jW2Yo4RhL7ZBRoFuMXGd03PmSNC8tJANtT0uYfhVHsxp7cqLkRa+qG8Y+1hK2JU6
L0qnJFJcU0rz01qKzUR7075MfcnDfonogjgmdU86MmKHxoB+tAhHk8fm0djNbVJj
adcoX5rxknvm6kMfiKTV3yxL6bpF7qhLx8iP9H3wS/Jz80iOl6ejrSn6/OB7F30L
vYiulg6jQ2Mk5jr1PiY2tXqEcsS6ypaKzlHfYnunrodaRPXSlsXwIPeQ3PDzYfuc
b5oVNgkH5V8cUIe71SZLvcpSDOoDg+3Ydd7FqhTZhfeRjbxd60SPiytWs1QvmBtX
mR7qWlochC3BtdZ8vzroeLK7zH3kxLLCMqpetr2qmppnvY4wMqhmqKxYFFdeobeX
9/jmXqHn6omD9tlsYbya9LjxccVe4xq35ryKasnkw9MlqH2IEa+Tg4GDrEloj/6B
qZ785eSu2jbhqRcrPTM2/dWrXAQepavPD8N812lqxhyVts1ESYbUBjic7zlnV1CW
LWrYqdlpBqq2967frpkcsxjVcNc63F+6JUXeJuPGoe5mu/BqduDjYlA/6tjX4nFe
5u2OzgJGU/okRH6nE78poq7CgjHZxD3OSdfabaFt0b3AZroyHYuVh4scB2ntoeL0
FTrWlV8c3yxmNg9GPpgYltHaq/A4EJsKJrK2tdZZClqpHIrocThUWcpZGzsac3f6
sM5zmDGVPl0hPU1a/aV69DgT1hfV4oT1uy5shXZF6B70rv0Rwd72uF+ln6xH6+Gc
ts1I3o5uFmEMT+ay3dqDVdS1mgPnoZkJ8pfk9VBzNRmnxasZnf3rHnunVYYPv+qt
My8WoHpmu+Weuq0HmtOP+qb6EVZ2uHAeZX4pOll2t/k8WVhz3/XQzLmWe7Si01Pm
pGDOff/wMZEtn9s+O632BsGvfvm56wXsMDOz/csxv3TRzpxkSWFhIX07YyPwud+m
ANb+lyHgCP/Fj2O68FXP/Djm3/hxCuJC/7Ub56Os+RxfGecknLMVoaKrf3SQ9rVw
lT1lhXQx5vibwljN8MIHeB9GBrEEC8LDjTpW7nbd60N0p3r6JTCrWlKwsooW7mmf
a+0Q7KFChpyK0/IdCr5CZ0GKHdGSTe5wIzJ1izjjbrft48nvNvNJuKleRUJVuYeY
qaT1bHat77Y+9xq2feT6vkiM91oej+adCu/Lzq6bHkLUucc1mvwvZBlUydcs11Vt
yvBpbKVJt8Zhq1UKB0inbol4FViMF/rf8K2VJSpZhgwk8L1/F+4o9eMcm2+wL/bY
Pqt4eHdjMiciTVaEELozjLPbez/6vSlHFLmPsi/xPw8oie7ceTAkFdt1W/hxmV+Z
uAt76Wt2uYLtMS+Hlsyu200OSEU1CjQNMInQOvKI/pxT4k/yWIt87sFO5o71EmwY
ipwkBC+5QTuzP8w0IoyH9SWqUTd/Xb6foBhxVDBV4nXapNZBsLiirZiD4yrJXTuZ
u1G4YPNcQoGFO+FMd/GJejs8r+0LKVFCWVAoVI1Ozm0szo/pOzGD8bcqW0xXlUjJ
tjCO5qIQ/D58TPtYY8tLufOc9FizpCCBQK2lh/kOncF7jpJ412k/nxUpPhjCRzHW
cd+7dIq1+lDech/IUplIbRisF5WvdVDYIu53iskMhKh5tT6NkYCsNwW3B7v0ynrF
FU5Ro6Xj0RootybfV6AQlwz4okF+K/Km+etn0/m2DARO2p3eBd2pVM7BsSGddbEO
r1YTtHOEjPNvaDsVUjUKEclDJVLtwH4KWFZMwVnDm2o7nUlPaA8OScLD19cvxj49
/EQz1v12BIlyhXKXhfvjFz3TT3zDTliPyzH93azBUmPd7c9bbo9DWtQ8x7Oi0juG
CcBTz/WrzqUJZWviacfdhrlftdU0yVvVl1+wREV2wOU6q8OLeoRVSqjWWE746aE7
hVcSJP6+prhNpYZFYlW/8SMFPJnCofQxVyxtZeiIpa4uUntB4c7K9K/+OkRRMp7f
k7GtIhIenyz1vOknNXQZMBTF3s+K0cTlYl57P01U7+mrWr/uw490SldF607lTpoQ
xRdFF35H+wWdlK70pBSRtG7pQUXni8e7d5mw7Ui3sPoHc/JLhqPVOKlsoogiZ7ZQ
vsu7DClTbj3nIU2f1c63dOrujLN5U2K7M0eR6nBoN6/2Rb1XS5YDavI4GtQZ+Ikd
artFLW1mwzx10mACiQveaj18OOO5zycMaZuYNXPGbe3JWhEGwqAXNz/fjoeXgUGF
/+we+axCL642dqETeXua6oBqjo2fuJocI2tQNlajzID6cd00eQQcn7uWJP7SbKlC
j0Mjo3pAK601m8ujlw1Oiisk5TF21X7VVqo8XR6+Zqe6znvu64+a8USosXpbZgjZ
fZ3moNZvJjwWsoruLObf+l5N8kHq8R7HXnUKxYQuf4kG+yYhvnOg2XanynLSnmZO
J+qU57OFpydEyUluyr9Oa+cz0fk0xcDOeSm8nOr+NK2dP8/7Y1pjAh7D/XVa+/E4
7n9jWkuIdFJSHMHy665ir+q5eQdMuoPnCg/u45bAhJb3l3wiB+nrTeYoAiOGgU6p
YqT0EULc746hKAbis6cGw/BbaHJNtfIionPjQQ/g13NYtydij5vVJ0fmS4ZHTNfd
h8tBckdPoevs1SCesKSoYawt12rdvNXesAeJgwaBogbxcdrEBFp8XwRy4KiKNybm
nURTwe4a3ROjijGaGjkyu6FTz7A77MJ3b4AQRAfZeDzIsOcgXykWNOIynUK37URQ
MvkyMmGlwKdm35lpyLPcTf9KXdEaHUU2m4Kn3oVbyZIYVCE3EUs6nRYEnaIVTTpl
muYGa1ylJBkLmtuj6O/fj78HYsCI0e2YJ0ux9GcSxcBd89+CBMG9auCstEUJ/M5p
lghyfms6GwDtL2nwFn042nxuocXkYLNA8bsBI/Wr+vvTz53vde8UIoUwYD/Js4kU
hSBVt4oxC1vNIVhdVR/6ava9ZmSS0EPxmLfF9VB5k2ylO1EwKFF90nIlm74KC7R7
VyPudkF1hDKo0OqGwNx0tuw6GLQFAyqciN8m9LXUednwBYkcMXBlxdIOIukBHfUC
+2HSU5u2Gl/OvZj2tUMV7rfY/F4kkpjMxqJzb9PfSot0dCChRHUbHe+hnc585DTv
bK2niU/6iL3ps6Asv/AK3tvfrMKHx0vtBZ0Rgrfn4LQnDhs5LK5HwgMMMwddkLsP
p1ypJGyLDS9ImATqrjW/K6T7siYaI0JLdaVZTlieXSiT68n8ARGiVoD19D3BO4pf
d5FCjWxJU2lw0ya9LWshb76AtU9GYPGiY4Ck0UMmeML8EGoCDPJ+IoEGFQlFJwFp
LgD9QZDvEwhBkPEThOMzi4egAS/XHmiZp2wPb2hBq35EfoiI9ERcAMG3VpoBYsLL
HO7pBhpmqmDmC6zXqDFCQ2j4GnAuwoJyHBhQjcL+L9BeCnzvIXuHQ/UsM0VYjneH
xB6vHE772UEybA+Y5cYxhLs3ejRkvz7yJ1Dxk5F8bgI48br2KRFnzHhY7I9j01Kl
WHwoJXXY0/gbIBof3bpwOIEWOKheMTU4/E0RoRdqdyHQiR+E3XkNmSEa+wLlNX5Z
sETYo1moG34p+tE4WE24M37qQdMGKvpDBlIMg9GG0Sr3sL+ymaAxe31/+sZg8P1b
NfJsfkd4NvS4YNoGFb1QPc38qPdQn/RXuAlQmj/ifiF46FGKo8VkzZoLXYI6HFTx
ZLkeeZps07mSagJj/Slqrd2GgRtxNYIngSfhZChRUw35C3gN6AdPUYkjwXct7yqh
4cHNwx17o9exyHu9k7W/44vm0qBlQPk+5JNgpSQBmUw4hqTvXWyFu5QxhV5KkhZ3
tMl4yaqIw1u5jMRtcdQFdGRz7yaBdUlRX/LLvaIgw5CVIhAVGpHhlCoTcBFwEX6j
gPzOekAtM7o8QUO2SsRdyp1ePJw5ajtqpjUnPCvsQcRy1GNS2VfDUU5RunRJ5LrE
nlInb49KIeVrBWoVvdLyVVLEpgvreH0kRWNTIwyeG8Qa+Bs8+8LaKE9a+dLrZclN
2QyBxfw+0jfEeEL9b1z6SgvvF3KNGo8y3BZnf33YH77YuEO0ULUDb0xqrDlHMUcw
hzdX0KZwo45Bb59ZAfdNUHhQRVDoNsvXsu6Z7jG2PHOd00rKiO9U1lRuEXciTCIg
IkIz7ynbDGIMJmRaZcoOMFiQWehbjFgcDtJlBXendzsldifospzOHvkt5Zf7u5Ye
WHyrX+JdCseLxavGw8VTxotiaWLFjbWObY2di51naS4000AsgtaY05gv0mGIiFnr
UDIhLQjkTMnJXU2n7eV7PZ7Fm2P4rkDNNE2moOuW9ks6TXbBEq0SRSchWWl6NXrd
PPn1FD75pJyk1zXiNZqebR97wKN6gYJxte9SAlJq9BP106YNSTLDsnqp0jTSuJs4
DIsfBWzyzWiS5fsnSL6UDG69r/hpYEJJr7y7sBvpwVczMpYs1orm1PzP6urZYkPJ
nPU8LW5pLnHfqRF5A9UCE7DGsXRpVmkUaZdpiNQp1WHUrAqX8g/qRxtiH2gbujf7
WswYFnS9Hf9alJNBO+lYs+rOHaudP45VIVPRvYuye+eQ7JARltfP2a8KZe+TvSNF
hbf7IPrywnRp12bQDCz5Y/L3/ZLpkwnqXZRdyF1piEjYG9gDtDi2vY+mSwlsw+iM
6IJ0nR+mDCiPRcxoLB903B8OnndssGoY/8Q7clx6SI0qjRomHtj8Kj18Hq8bUed5
VJ5qmGpeycs9g3WL9XQ+Lj5/vmC+W9WO1Vnu9Pv6x5DHjgfj28Mb8wfDh7LQHNDZ
8AsIr6HFoFVg+RCZ4G/COEDX10LUVjwlou/Tvas1gAUpdCTs6MMDz4qkjXlgh0NH
w5JNtuJSquzs4ewETWsgKiLcUCER2tLXIh4YjCWN5STWKt4oOih+X/SxaJSodJQa
jXrBrFiQRhD4LS8WET7m47uOthl7fePSfjMrXxBm1uiYtSILVkZti+Yy2rtzX+jW
qj+iIsQnuj2Jdup/qy5j7l7ujm6Z0xz0cHiF3+HL+Sbq+eBN7X3jozDoKO8P3r0i
UQ3a/oaSuZKYkjOQsoJFUw4fdLe8ZjNevXiVRsmc0ZvRae5duF/YL0SqH5BPrc3M
S37m6bOkMQiXt5kPrinfShXoDbtHYaduUhEdcnLvm0TQ3TjSZ+qIBRYfJkzFjZPa
5DvQv+7Mxs5at99u3W499GA1YXVyMK12PPE9qmVde4CS4zOUqzVWJuOkXVs+/a16
OdQKbCUxstEu1h5sjD9pHTAxIJ8sn1+tZ1aw/rVJqExIfrqKtksTxbLREtNyddyk
IMdiLOqOTu83g/YvAV9kST+/XJ5Ud1f9Pt6x671a9Wb3zaHTlCOc0+fxxfJttRgD
dZ2Rntwp7Zy5jq3UrZIK1ZVqFX3NR3qo5qFGoYVM7z5USeVZiA+mL71e8sILjf1a
tfS4ZDVhtHlsuGbSyrMfIhiqEZaPEIOg0rNlT+7BmXfeqP95Oru+ezl1qbzG1FPX
U2RVYjOsW9xH/E1zXajDIPfAMPs79ldsdcEvm97PPGq2OZ76Jvz4VtaiHHNa2T40
BzHn5pfmfaL1RCSeEZcA98xF8uOk3eIejQCNlKHPQ/7Fr9nMH997PLn4pD/hdtdt
Wv64U7edoN2Y2II2U+nusC7M+DjOJCePLaEmn81Af2w/LlV7vvLC2b6E3PzciXav
qDydzTLbjLGqwyPlqCzTXE5tbvcE96pV3+PgIcKKxEjdFQ/zxaJ1q6rFhwXHkTM5
IdUw7vMH2of0E7vl7nMhpwn4UIE3Dtboqh+f6nzmXXSfOO6FzUDV4e9w5Tg2OzZc
mUklR5ClSszkzzke3B82yajaWUke1usueG4a6lsqTH8a8T1Pth6mO6ObWqxQbEk8
R7w76HvQuOv7ncaN9qCo/hmfGsqT4r2I3qwkD6fDKlOD1oaNB73LMfxSE++qOQ+G
dq3mjRZm+53M19+mB0xkVfPveh2nHBruNIctrsjuy0YkBfM7ucEfbTmTWZl8ndzz
3j78zT3tZbyciY2R6VJ46YX/fE97fg/70z3tr9FiIM5u93eRcyAY7mBtD8Ripc2N
7MCa4Iv7X+2forhMv+YprG+vb2ljepn5j1C4irHt+S8L0TPSsfwcBf419g9Ew8H0
ig4G9ueHSrYOxhcngEpdnBRRUZYVFqMWtDXXt6SVPCvO3PC+0oWliLGdoa35Q3sb
WwSmH5F3Ueuz23Bz6zNG9/UNFWys9K3/kIiZ29rZC5vp24JZWM/u8/V/HDAysoHp
Vc2N7M2AajMzMyMwgJnYAb/han/s53302z+EXyS/+WNl+Kvk178zPgh/6opfQ/t/
bpCLYxl9K8Bl+ZsWtNQ3tQNzsl2oCp1dEgiatKyM7GBaZiZWMCMzOyeYk5P97Mq4
MBG0NrU0BtOeqQvaGQJf1eBkYAXcoYsDWqaz3j27HB5KGJubmtkjsAONqmhvbKVy
XsI9Y/3zPmA+c6bULlTArGdu2LmKBJgD+AqAo+l5J4BZWBiB3nO+OGIEOuSc4Zm7
ZcwEZrr4WsVPTfHztxYunbcf3xq5OGQEszGwMfzX/lowB7IzxmDR/OeY8ZFOspFW
zzpI5vYXaAXqN29KSDw3Cl9p+ngTjGbP/sTyiUAqmNKfhQLSwr0HhvSEJ0sFEUEE
+tUIcs99pY9DfKd8iXyr6Spvejx6FdCPKC0wX7qbmhh67+nocjutce4dfX7czbln
upbQVVRSLMBjeQNFq12FveTZyV1PEbPJDw4JtkFs6EzQKoV5WrfTbkGK0GuXWRwH
4CRsoYGcsoveuLgE+bZ7S2v4o6c9YprezMnirjCw32r3ZlbNUWejkf2O2+ufFVfh
ewib4/k98usgLeMx0v3Eseq3aXbR1ne1PlUXG6sRuYOaCLW/2lbYE5TWwkiQkrjB
YPZA39ADC0HQgPQisgmdpWI/g/KPdohU6d+ruFm19R1Bf6raZW9mPdKcEdh+o/iM
mtZk+uYg2/JB7JMl+H4/E+H7n0+k06uTTBmf3Ya+z7CFIxzs011w/HrR4LDOuDEX
bmyY+i2mOQeN2Sxz1WaraFzmSzVUglS3+K35Vy4Udzn8tm62sVBkk1cK96/D0/fK
r6/4pnaK7HZlDmssLzoMNj7UEkKKazcszVfrH+tfXuxb4K0SnWPkslEIIky6Px5o
iTqyX4aSA41IoaowIRKT3rW38zbYX5k53WLQcS/kA6Z6aMH46/dxS6tD9z+vBpA8
2iKYIfBy11EOmH/XmcD1+XU9KVf2gL4XSg7XZ+8ki6rljVIU1MV8Ab8Irvi0elau
gW+bPG+6KRLSdig9lqR83aDhG90wSO3n0qTr+FjSSHnUy/mfYqkuGpmnapFgytNF
5oVvwUu/sunOCo9/tepinYEBgd7R8hEaF5cloFWSTBUa9cTVTLpuKhKaQTyfKZ5d
OpPJkHNnW8OJ9BVRWoff9pBU87vi7HAQEzdaJB0nibO72oFOQDQDjTu5KE65wusa
aai+kr7tvuG+e4tFlVAKROa8WJF3FLzJc7Rd0B0/GkcUS263lEJkSGuQjt9ZTlV2
FKILLAyiYp1jleSLUarvs1Rfn+Pyj+WkcpFY6AoEE0Zo9XW/MUjXKZLIclWKvZsT
QWbhqk/JPzTOyjhmy2qvFCuQENz/eFMC8WYH/Ne+tVDvNXchp9CeKvmF3Jvl6fDj
pEJ7GCkVcgt0aOW3hZyKe3jFJFhJ40QUUyknMEyZYoLIJhru6UkFi3SXEoxKSbIG
4DFt4c1++9BSyATx9GNPgx7ZO8r4KJd51TRV3vdIldLG3+K+S0HP4MUqPVMItviA
XRk8GLOk5Md+R2Q+4w1KHlWH9gIi8cQ8eW5bsRganjt6R5/a3qeBWTxdomCLId69
URaCqnmdGqK+YWUTFTJZWaosh1MicDIzlHVzqOzXUNGc2YSK6tAb48PUEsMIIl3k
HzRJKliZ7IIO8p2qZcf5m/KwzH0WcGpU3R/+L8bNAViUnVvQ2/vss23btm2cbdu2
bdu2bdu2bdvm3P/eee/9r2am3lTXqqTTa2Wlk04l9XVWd+foSsjMHn9MB2zOUuzO
ysjRgUO2G0bOhMvHlzYGhhYsRZiM+4xZ6KPkjUBRMXhSsYsTN46Be3i16AJNcQpN
QP4F+dm9krvBnZo57D2T0JVRpl9d+/ZqJKPKadA7cgxnIRwetnmFzspZTFORsqlW
MFGY4iWIWFByeGGF2Gij8eI6rlLmAAWiqCLJObdd+1GdcWNzaRrIG3gWyNR5RcBX
TGmyecjAQvFUUlt3LET5F7NhZvDC0PPZeyupodSOxUVIS5uDrt3rEluRehPZkqxa
2hkcZW0vWg1GGLHssvEYk8exiAavF8zz2frdoDQaCntFplJ6qHHNsixBXdVA/mTU
wmWz9yYrFUJYlpCXpp6jyUnVI19xyRT3vTMUbwvMgfRtudtDl7mRYAIt0S+cJWTb
jzCVV+AZ/TuhfFL9ybDBylkkdmshu0ATFlhKeabo6bERdoRkDg7Or2gYhrKCgoff
A1hZGDNz4pCLs7Bq7td+cp4whkBCPwJvlcEh6/moTGuz6ac5azlmbTjo04GnboDR
A86nQTgS+HBxIUe1OM1y7hA8QXhcoC8Heqe+G7qwSTkjqGqcXiGsgmCNAzZ5cG2n
GrZw170g7yKkAxa2CNUhHwWcdKBUsaDMtSjvrSptL/motSg2eVf9YNap4KJtkLc8
95fqgsV5hOeFNy3o38DS9WqGLgiF/OSTvmu1oZbu6Zdf2J6hbcHpp2bvAh26PE+d
ONcBW7cc17rUl8rNIR5LtXjvqonuecmSscBNsyLq2LcKrpGfr1gHdKA6/TFtkt93
eTXB3RHX+DOkvYalQLCbEtudUDa9uLsGr5w0vciTfRhtztu9NZHForAJUwa5oSwt
abIyJ9EAlr5SSHWkeIPODhsh2jjvySx80fEJlTRB9vc9YfpOCDy9RJP9lpm+Tmy4
G7ao2vpAlAYu9dyXGtO9R/IUe84Ooq0Km2bXf7qjb/Z56dXz2+RsGpnXkbfQuXG+
EIcU/TVTha1o/DHz0jrfyTchXAaUMapGyLkBOfVosYJ+PfLzdgKX7Mk4Kr+jINb9
KtEDre5VWhX+mIX/ZO4Os2kYqkzjHpK2/70i5HWTJ7x3fHKP/bkhSMfkZPoha3rK
WxA2Z/uYdGoyxx9eLEQ/UxzK0QdOvfjAbcvLJcGN4yuYK38eAnuW+aISnpkWH1qW
6ndwh+GoD5i8q2nZS6IZltWKc9P/UYuJOzQiN6Rdf4z2DcPb2/AK6i0cl0fHCNnA
EBZl8DY5RlK/Zkm80d++xu8c2MV3Rv3s8czzEes12W24YyeuSVFkpwmjMjJ1iGJn
0Upjzd0Sx8l35xnAOfDA5K3MkzJz4jN8cwR7Z3N/8noDhTLgFQwOHYPGw+JpCVJg
2rnMtrJq/uliMPgK7oeIEYjcL6KXYJtim9jtHX6GF2jmFDi6QInT/Cs70OUW7RPe
o1XRGeCkvuROT/KQYc/4OuVVB4z2M1OJDvlCjeOFVTPkAi/KA4y2X5ht3PWZh+O1
xA61k4/SjLMjzelOudPPJxh3UPrbKtsAeHaAxnQLXeGt5GygPbq7psKOI0m53/wV
+U8Q66miC+wniDdwD0O6GmvUB8yonhMdqImpwQBPiEMjR3wtgnW+E0NoB3TWpXhn
FOfE/p47lmGJXXoeovIs6pf0pVFDG6utr/I2JJNO5+r4uC05VD/pK5J3Pwofdwem
8wMldM+IwmnvWrByuk9vzp6xLaXqb4/v8NrB8JBduqrABLoID2SUPeDGdxkG8Eld
i12Ia+FPSqxh6E+J6qTKS32ubSmLPbxHe6dO0PI9Ohe06D2eay3HXvxuSJs+8ILs
vqHbproQn2hIdInXubmVEJ7+rlflxhwviKK5lTZQQco7O56I5SMw9S4LcgEUNr4n
3BLsAnBJxfHiJ1fcqRWm9Y3JxnELs5N0UNZ9lUb962KyJF2aSeODXWNl4tFhxXZE
Sd8vOSviHaCVXfBPnnXcdy2lqOrxsxVlSUraDHUOI3u7ucJ+/7BpT9Ft5jZE+/oR
yoPLeibnSdON0srJyMfGxcRDorn0VDibMMYMkAI/EWT8nYJFMENm0tx7dgmtLIWC
JGN9Jp2+X6UMdeY1y3JGVdqMYdXzjnHH4T95Z+Fm7SJMcomUuf1ptB5Iatxnyqel
a4u7Bfdd1kO0FSdP9l3axw6OBH6/OrLMR7MnlVsq9fmeS5su1AOyfTfSYvD/aEbJ
LyCcTIbIZgaFo1CUoUt4/GIsLtDWRc++h8vqQxwVdUrcfy5V+61UZNxqKfNg72Qd
MHPQvHblbdIdzjyRWERhimsYUg3E7M5aXieC/Gh9yJK06WdlT/YjZOshFFgEKPpp
b+T2QJAzzqyAicM8xv/VvhS5AcbgQ1Rmx4Fs2SZvfuCfPcmipgAD1jJ6Xg22g+xk
5VwF2pOznttO1cECV1lU3bIgq2cMiF6SVtOG4FAufGea2StVb65cnrS8KwWIESvH
j3xc1RIiGmX/JDzTSxaDZflI7tw0X/yasVUgWAaX2dLNOkFsokVtdxwyWKjKJBi2
vCfg2Z8UhBLuKFmc4uj016rMiiC9SCVvPHsmmJQyZhgmgy9abJ5rRAGSIlVUunAg
Wl5EU6JnqjDF7JerWn1HnliKUS8sDOMNzXQ5/jZTfcwE6xC5tr+SC9E0Rs/Qp2j5
nVfJgWWunc1CG4iBIVZv1y4tY3dcE1GLUKRVGCEDEQR7/F6a3tPpq2/dYlHQTr3v
XyRUmoHpSa8eXNRM1/r7dHMYKP1wEDa+ETTd8AE2Pu4cMKj4Ru9KGcisnNzksCn8
jDx72R554QfX7o/kdVaN61koiYe/317ZuVVnePhYk6/8phiLpryCuWdmlJlChsTk
8Jl8elhEuohi6O1QhSdLl4gXCW3ML5L0cA7wI3UlqMWhXN5pa1xtsp9KeaL3IOU/
orzKmM6C1C5QmBiMGlnOyF5Jbnf80xtimNAPLCygAXYqY+ZmkJBgFshtLGi/WETz
M1Io6ktBPla1m1lXr/OmSFny40x/WDLUO7Zkqhv12ac0wJbwQVtYAjVbnbwTamKs
Y++XRXRS8SsgFD++pK9QYbdIXhZgE+pPCYNVdPFhZ/vGT6HAiWbBEE9hU+KmHfhM
4jiyCrR4fppCPlYWv/1Q0u5lcN5/hGTYs+KufSdawWQQhTO6nw3ChbC+VNLR9V+5
pIlgQZQxwIBx+8JC2EMRG/vhA6kS5nLH0G1VFyy0XSNp2HcUoZQnUWiVF2GV+YiT
hiZASJDXEy7F10BOSWBSjK4HjVIAafwmc2YJmkAIL9Wa098TtQi2YS7hXlIBYflR
eqo5FvirlmBDd6D4+t7Eg8iLnPXEYSamhkfh25F0H+NO1ayD97DLL7gklhOcKscF
fiTgWGOVjgrvWXfPOi7BGKxvP4ceDJWI0Yl06Zvty2Q0v6kWbK8/mO718N1wijVC
kA1de5kZBZuJpHCqAMWSFCAVlhQ5nlSNRH5cRP6YYlKPgariQa6gy6IM1fk+oouI
NxMeMyTLk6w7VOliJJmYo5GKyNoSq53B4gWoe3AShMtuxJ6R2SpSidhb2329re2z
PqXrRfOjlToqhgbI6q0yzNmFvN4XCqhGRqD+DO6RiXjIDasmJ49HivSVGqKiJiWb
lhmOH2ZCsId74WMHv7uwOF/1fB+b6HQ6nEXnvUzz2G1Uxl+Mm1BvwrVe7+XxC/oE
Nz70C+blKZRco2XMMZKo2U1rupupvLYm8hvMwnNPlDwsnFU3bCGrDDcVVTd+9Y+a
mPsooISKJ0zsNxPXCTez2AW4db2WjulKSsl0DWsG8BwzolcdIJ5o2Hrig+RmiAC8
Go4RGIo7CtyPqYZC9YhJpgRlzinjEoWHUc1xGperYK7YOK7QLueU4MV+nFDOkKYg
U+HAgYOTIMcvRGAfegTPlUZOpDGwu3naybmnxyYURDLKw81HREiwfcC/FGnNdKMK
bXrsLtE5b7a6r/TT5NyId3IeJaVMdz5jTXM/zk+/Jjf15fVsNjld9Jxpa+vCoj33
ka2ej2eYaelpmWzpexHdzSWWTJ2fIhbMFA/ODe7hTfweS/4sdDVIHlSr1CEStiWj
ciZ5OYArpNOwKZ/BwtVrthUoOQI1LkA3AXZ4DJxg4PFhSBV+gGE0ia7F7mou61r3
V71sZbONy5zf9T0mpg4dL6w/ZLhjnpqyxJi0QxwdmEcqamQrSqREQZou9Qg9GVbW
6hhXYjufxjZwTuxeg8PBbOcm5KzZ7wuJLz50T4yqtOLEuEZbb/W6FfNo55LW6HH0
6BZzA+KSXPzxjhxEOPNm8ZtOZD3VJ6JoVkA/64S4vkCdLCtzUqyystA+ypxb6yy3
UvMi/GRFJ4Jo/L8gw/+IzGBi+K/f4H9HlPyfwOh/YG8iMgpKkjL/kKP/G3T739Ey
/3/QjZHh36EbA8O/Qbd/4a3/DrwYGRn/lv+6+wfJMTOz/E/y+1/pv6yY2f5Fyf6x
ocNjYWH9W/6F6/5Bdix/h9/8O+xj+8vP38//KvlL9+82/W33l+Y/NuxM/9T536//
9E73X/l/1fqPZwYGhr9r+iv928O/t/efd/uX3X/o/yv/j6+/a/tL/hv4+/dImv8J
/P0fw/c38fvXOPwH8cPToGZhYf6H+DHQ/eWLno6ORev3f0N+dP9fxA/v34nfv/Dq
P8Tv9/+L+DH9P4nf3+34d+L3T6DQv/XBf5zp+Hfi98+Rjv8kfgxsDH+p/Y/IL7EL
Qjdx6IuVh3Hm4dKLyyNnbcswYarOjw8hmo8IVpRP+HoAJCzwI5kwFFXiFkAIqfGJ
pxcT1hACcEBPPMmcm6xRXaMJxXyuHLkoOR+5/sPb2DlgVeen5+Xrxvj4jYfxgWuG
i3HHo7tBre7zfG1QQD1MqDEtooSWeB/xMmjAxrhaE34iW+Mr8JRkWo3Dxe55sykU
7uiiLaI6I4Ebds/Tc61zbcHEaGaMHetjWpD/OVP5QJXN5i7couHEr4ytu8V0bFLT
KxSVVp3ra33zYSzHFqfD/H1/rdM/tuJ33FAyjZkavvTYPrjtZqvj26Wmxzpf6Btq
vjRmcZjBwxFGnu97rI04tVviKQQhRRleAkTcyZibUB97jcpqsUf3lqtxetezTnAs
v+b7oE7EBNtteqfjAyxn+3H5oG5fmVzjCXKrNC8ZdzqU0hgsp3erNjJx5/5nyYw2
gxzFWtKtaAxOrMSYHRFJUjPxQ75HkT55jZWu4kXsfkdmtsTHLo48lEslnBvUG0Ih
thh4nCGDVHiusnA3RhmyGfg8f2GBGIdA7MM62jxCIbXYSJyjfDaSdYTwUt+QPMAK
2G2385hoN/84njhReCeQGdQ8U6GUmEasYz42rZp/I8YZ3jw5EfYckc4Gt9JpR80V
jN1qk65cEVtWNnfWOpG0i9Z2Knc0Rgo3TAfRhiVfs9rNuaXdDP6agZ3b8ylVueXQ
lEtaZVJWQFc8Ku2Z8EgKQcklXJ2CRL5hxSE+ORFJXkW+UEJmx2/EJA0YCYY8hASy
NOH8NOmwZjXspAApqoFufGkEI52GhDUMZ/uUKbk2o9uiS8R64DO8+EGevhfaS1pD
Zs7pESw37HmUwgAx0dhu/vm6g1ecgZeZy5nBaR4SZDEnsYXYZjxsoXcw8Rkekep6
XrtIePaQi1i0D0T7JK/AlfdfbVlev04Fn/WKE7o2lmuK7WsA4pHZ8dQTgT3zsHYf
lZ1rd5q+OpDQknolgQue/4AawpXF/14PdxflJPLRuPo0Bf+4qFZlaHeypX3GEcen
fzzk5nrjRhDEiFiMbEQSBz/14rtJUC6cEtOIkxfrZTikkI/sCnqEmf8oRI0PZkIZ
641u3qPHvhTT0BdzrE35Cu7i90S7G7hc2X+F8dDC2jHuQRhhtYvM/aZ+dtcgkgDL
kJOxjQovCDcAPUd+ntAKmjY1rg3AHvwlEqeCt4QfxZ8e3AghPgJT79+sJkdqXZ/T
CYoRXc9yH8TGI5hNB2fFr/gHChRo2DUZzRYez1BDXwNB8s/mC560W3LrBQ4f15/N
dni4GYSVGsDBhsH8JF/X5NQmgL8KFIoB99X0J4X4RjlWDWhRUUQ/otTEDAKuLjEi
55nRiizoJFbg0rQGeg53GG4OBqyMjNDqQhoNzdQanXCtuPk0RhaWSU0vLNfdEa20
BDUszC6SGpnFNQYamQU0mNfbc55HZBvlq75IS5jTc5q7hTVaFpZR1tNzq4Qbm2Kb
h015qwKOWrSAygfytLGcoY+FRu5dtJh+bY5M39Pnv/W+ed4GBozG4BkNpgWL1Plb
HvAF4kI6Jy0ZzXjAlGoyvOo/Y9B4Qi/cYrAHExn4awNjdAVndAZvrMWt4EsJnv/1
WZAHFApeAHWOkMRt/N2HUoLqUY/Q8dKOJ5iOQXHEo26oLqHRSng1ghgDM6sWryi7
GTP3TVzMlSRLEUVSeuYxs/RxkoFPhNq0aA0LeraOshfZN5U7PibEw30izqgbQvd0
8BkOI1JWP9MRzrPg6wgfBQHcj94IcX5OjcFEpvDRX+IRbDeC/WDa2lL9l6BYlBv9
CXZpXdRyOFuiVp/l3HM+ITJCPb9c6HxzQl5Ef+AuYs00Hl/I3PRkHrtur+ZYKTmg
yNhjT3PZLiPCij0Gvgo2dhCkVnL385pPpT5rSd0NXIUc9VQVJ6eVNdf8GadwsHNS
EbrQXjBRsuGX1G1nuOfab5Pm1i0reD7Tuee0TwUYIJPzGor07mZdhTZt5XtgOGQo
V3ZKbGZj5l6WVM4nnt7eS3lkcOc7oKUDzGvRqcAS+nRn0Q2BGeECOggdNP/Yl50s
Q+yVAAsoEECqgobkZU7hkUZioLUlFmrOi7HY98NxMCyxJ0Rmwv/JSoO7yS22U5CX
8PwlxS4aH4cYUvhOKup8ynig8BVPqPBep8J0WfhYLZJYvPoOI0HC4jgLRdtOnWgP
Y7X6h8xp09kkFPePdUdDXdxrF+XFp9M0f3T63sD3n2Wq3xkhxD6frz4gCd+G2ufd
cYgY8jMnzMUU7LFjFlhp72uBq4vBXY8a7uXeq9rvsN6mlquU0Pk7yzEnR/O5elFR
hJynhnPRg6e8szBoAcDr6HipbpwIjEL1VzjjzZT9T6Yqo7CmJkzxBHPVo6ZIV4bj
G1eW5JW4zQ1w6Ouv+oXCjWZ3QzSWD8rw60j4gpg2lG5/Gt0mNsY3CsHCNgIHTBH4
g0mYxPrzxVPBhBHnHrLyxYWrx65OMjZpsomMPAjXb6Fa6nBurA24o1lQoQ5/YKZx
4iXntYAxTaSrcrBrbKJXZkTMpbfq7LN5lzgIUTbYG+JUBuXl892GJ90+2bycy+l5
PFTNjT1VLU/47LZ8FGWOloAPBpzjy54QMZ2ll4xhLTBLoStjZHCXWy0GV8+9ed2W
r05ylLife7gsqHrUmH2Wf/1lxlWBW4PTl7MUw1uB+1eJVaArCjwbT7NeiR+UGVb4
28GI1qQlUDdLyD1miOtSUQDIPczkyw7SOriVESY9KaZC8mtsInLYgVNMHzfYA8Us
Uk193mp2xf0OEx1vY4z1hFIZmfNgSOxheIVGNcn3+9tAvQ/1a67p0JInRb1bfMrX
Cmz6Yknj2UCrNTeDEoueYbn1ZmJwlju3REYIc74ln0vamuZO3NkkyrPQHsC2bPw0
66FRU+ek6STzZ04r3nugfuS0NhnGh4sctYBKbLIIOTI6e5wfsmSmv14qR5EeriM5
DZE6xp0/NZO4RvvN8I5gL5GGwO069ZbZ0BI7GSsKpb3oXCOxeDz1luC8VwcRLlVc
WJ16HIiFwnMcgLysWzLIIYjfV8Ib5vzJZ2p2zlvmygPhB0JkNWHKrzWR5oU3Q052
Me2iEtslmPqURsRqIGjCmFilwxND7MF1pMRN6eGDitzPE6ZYsxCjezaQ44NDunVt
aWuCj9CUd0ad2KVDljMtTSfMungghtRI4j+jWY/1k0uGFOwkOwLvcROjSobkVlNM
htfjmwlu4VxSzxI9047wjBDxaa84055Vn/QPpPPAKpt/cIhGTrmHt4QGFNTn7uXq
M7mImMeYGFkfgN1jZar5cQ0ZwrGKs6jCOmZIfAq82yUwwju40sSNYPKUUpni3A7x
62Oe8whVuxmYGSkcUl3vIi3sVsDFMdcCbMDdgjzFqMfLJhXSFIj4xseIXXOc7zHX
yYs6lgsv6Kx/i5QlLuYaQ7yBugVgFdm9/2kWqiNLCi/WzHGLaRW3YYDo8kJR8Rbp
MWDd61B318LJRhewREvpeDNN0InrmcWryjU4NVQeT64dKTwa9CV9HnZBSYu58wZw
+WGcNYVtqCWcT7iHvFfT0n53HQ5GF48NGSs4TFkMZ42aQ3Fn9Mr5ToI2WlgduEQ8
O7l3uL95XLhbVokfOpS+B3qL5jDz4YjW5j+ZU3LE7srgEYNdKHh0YEmVMoRcY53n
Mkt7DOcC2YGwj/CMqFduE3xxa8f3IvvaeHRJG59UZ4B5rQXr6knhCmbd+BMdC3vL
LcKT95tZAbObPl2GdA7ztitsWzwnd+PUoRFbhl2CN0+Hj+grItsotlFyREDWu/U3
kslEnt53Jnd/9K5HotfQN/VbIRA5+VOceZGIGYR7k/R65I31Ga29LA+BCd100rjX
OIpRxr3/fbm9hMncDhT6z3Qbacd4+3cmydnT2ce81dnzpE4ouMOvM0DESpSunOgb
oMkXr95W7EMt875VUDN0bCHagVHJAshTBndqkXvldzgv9ccvYneAgkfwd+h3SyO9
uZPsSljM/uFdD+KMqWR+9I6QpoaXNdh4bYY/zmOESeKEhSRmzY0C7dLtMhLiN2K4
f3LETAodXo0NE7CSIA8DMxNFRxcOK45GDnvGfBSKKWwoc84l24fam9phtnhzl6Dm
Y5ZiFljPWM9eTncYmYA5dQg7xiZ6ex9w3TXVCZf+dIxpVUrA9Aa+Qd+6YaQRR+n3
KjZHVZuwzjsrl2pWYI6Czc8dJmb2qvZMN9cyWuYyhUcXIo4CLXN6CGZpeOPIVn1i
sJPj9nZ8gbl0K5vksdbZOKLMg2GXgXHM1xRq28u7Z3iSYRe4v9ndx1nm87jHc1NG
gaJ0EsDKY4h1P/5yE1cXsSHqUOPGL24Ijuo9mHt0uw0Ka4z3pjXKBYsBQ3lK+Jaw
xodcwx0Tn71zt+fNIp4hdomjaA//jOICLidTqp5POuN6lGLR2e7VbMyie2Pv1IKm
LozfJ2mZJznD32K9BLZnZifIGM0pQp37ILwkNkv0lECXOfEDsiayGKufxLDPmsf7
iZ4mRsiSDD882LWuKJRgxx1Z2qVQ6Ft49m1/8YOFShbJG4SdbINypYfA2sf3xAXI
ifXjf+A/SAmI+ApuvCCph2FQqZOzxXY135aOIVVgmIkFZ3QYU0rzEIO9DXBKU2o9
YLknXxNqntuYZ40toiPmBbDSKYYyEU3cS8OxBP7wldJ9+XL0pl8XXpTpHnwhnpzE
M+Jdw/vxk8RzSotK2wHu+NOrh0vEmFub3avhHUWqSeUUX/5o2szIqKke/sItMmyU
PSVUFjY5QUVgMAp436iNv/AkPmkX/g1z4wGcNjVsoizWsPBAD5NB9xtD5ML8Nmej
KS+BBGb5HExLkdOWT+rH26u8gsLjpfx0rYBLTVldPpOMIhL1cCQ/rtOWDO32oxOn
ZeJM9oqlYsiSAeORQzgZjfjo6W5vqk4xn52YdB9VZzMgZ6SkQPcdFHSqDC08+KdR
imK4JiO6PKdxcdZ+2qdxsZ666YG6DKOCuIl73ODpTvX8tta1MkAafQXgdVrvblj1
vNBXFMK1wbfK9+HBjr9ym9dGlUo4w+CpbI/yxKrUBme5IPOaKSN4OGSa5YmMlFPK
2NeYj1zH80z6HFMItNfzCdiZQb92H1mh77X2XREv+o8dZlmp93vl4qod9NOAwNtb
FPe4guPp5Gsk0l66vDwTvuCQgXx7HnmXq6Qlj2MmUhthc0Onw8AwTNKkqbS68ZCJ
VM56bHzxAc4TuSjCDHbyvZZP/88BuTVMluVWUBO+mWCXj3ck63atnhZVk5PmAOhK
8P0bNgamHazmRHgwqw1atKjNoGTUYbtr+Nbyamx+y16cLFXEoIbRDm3FEwozbWhR
5B3+nRsmCpOBuT+mvOGn05tVX24zq0MmyIUBJgnL4IOCU57rwaPeXpZ1vd6nUweQ
OtXtQjrOEaeSqLOuy/ole69+F1xqFP/MMoQY08ns6N2JaPI9zzCtH0lq+FRkHim0
XaeCT/bUtQzL5GUMRG9J3H75ItXk6GeinekDmBMA7QjlfKJ84bAB5rewL+Bdgs5X
o6F7tZBK4XfErUQ06YkctXCJy0CZIYOS8rCcEC+SQzgPDMKJl3tizaXu3as88jMj
K8aoauTV4zAgMtr3pydPn4ujqSGYtHzVAUb9CT0D4aJI4+/T5cq0FUfnFVeSu/Tl
6/SHFNYRv7GrzWzi7ER8u++ZanetpwewwtIXn7LsrCpcdnwehHK7Sm9BBxgLUenP
MbXmbFiyYWgndrIjjHW8ILRxtkGB+NIp89EtqVwaVlV5e/hvR6AyE6dT6F4JOQGD
AQXzh6G1zrnEnJyCtJ8NYew0hU8Ku9e7+k2LQjAiB+wpZ07mW9IT3rNsowAmewJV
mADjHr2AM1InviZLWtoxbN87uscHA0EFQwSyhl8+dOzvD4toEmZoDIuSIMhh+8Oy
14+k0IJtERh3e6trBZ5srsfB0AMHdXuY6aySN6ON06Eji6/BXZdKz+fBRU+7zmqD
Z6OXHYSJGN118IQsMTAAbnQMhiaZ1bgtCgUXpJJmq5CoopZfg8EsImuzx/hRnuqr
s2HQbXrwiP1yuA6hyIi6UCl3l271FClgB545mwIk+NiC5cLpkUhC+0YFscWE/CaD
bxGG5NEKiWNpNEYMbTJuAZP87pLflGvBH1iL3DI4vW+E7RgMiE8x+FLCWrSJ3NU9
iM5/INuQzKgrh+rYYEQxwi402WDybGKfxFp2cS5spxfovIV4bQQ/OBopB9+ofQNa
cV1uDwmTfEFK8UD8lQixzwbdIjXjKPvErwd0CQ15GZg8eZDcTQ9E9P2V9P2IDQid
5aL2Bkf8DoloTAFx+DbVRHVBjXi98xzCQQlMs91iH2+zjs9puAZ125Bi2ciJhGeP
IchRkohrqcfFEJwB/GhWEDHEaVeBk9gqCDylwn24XqX9ee5Y3vy7+97FUsa/cvlx
5q9mKYPph9+GT6TsFl6OBZPPlIfWLb+yvKrVK7pvTB27D+U1XzpeXAt4Mm4cfir8
RgIIBQUFawLBj6VCH6Pe83+iqyjQNG7FPU30TPZ1iN+KVGt3sYT2gAn0uMS6CXfk
AqGyGe1pSJyyF5DskwcPpXmGK+YPVBvuaZYraeYlh5ypRNmewJSucpU6RlEyAEWn
8nb0O+LFypESiM6ERwowv8SfJBVW0hLO0xIKq5urm11o14UQJ+W2amx6KLJwdGIk
zuo8fBjNx/2YV5B1kGTmDd03Ad+5m7y+9FbWCqIwrzd+JDjSo78O3xqY/0BQyqXN
FcrvM93jpDaLIY04V6JqmQGHmKoosUD0vlw5dwBIN2pUAb1KNGRIWsZvoTTRb0RM
a+K2HX3hfjkOhRW0s/nZJKG2x4y3L88a1u/m71+sYKUynIu5Y3FL/9jr3nhhFn9e
W66E6JT0SGHOTvQ1BlDrRtBnH6nrkmtQ1Mk5IhkwSavKqoWDAbqdZX0fmj4JJbyj
l6E51bvQ1keytL0feoA1yK/XebDiXniNLvedJ4nFHZs0DQ6al/RhaUE3iGyHv1fd
H8CG1ln1t+6jKHmVc33A4PJAzZMkMPgkYEuQHpPHSK+PsTHOSvaFVrYSKlfMrMa9
aUZCgDcC4CIVBKi+ksHXDPlv9k+IgYId0tUPtPL6CJiWXPtsnzFdF2YEcnoFzyH3
rqj3WoId4lHQ4pcP9TtoO38n8243aKFClupJqmBGpPkAGvVHHArVD2RxCi5XGVxM
XVzZrCMVbF+aPFVPcKWABQeTtBe7F4MNh6Cco6abtKO4oYClC67UWThSTq1srJzh
zO6UdJ/9xHbVeOx8xnG7fg9pRKp7d7anxCEUmBsOT8mJQgIirliSRfETGxs6HEZx
DuaS+NVITcR7mr5VLBQb2dI8nuCGL66eymd5VVB0aZPGCqDSkkm3KtooGemEpIei
njoloHR3OBlthONDbnt9dl1cb39slivNcLsslP/JWO1QLEbtYrNS4XjQ48jytvoA
pl0QXXjxcfiN8uFfc1Jz9OANheiK4mBCwNmYWqiGvQR5tGSJ6DGL10OmQDhHLslA
sdh/qkEy54HoQypg0IpCY+v3BNC9iKUvMKAvYKUvQD+u7iuj8pIZ+gahjjRlXqPc
LpqfImBwa09HrLstanFmRRRRPhGPd5jp8ptQgbO8Inlx6c28tCA4BtZM4ngEmyOr
W0Znlplzg+d1K+zFR75OoFtvtvz0D+F2+vBOFcpyAs4NSp7Noe3YqWyVd8of1rH1
OPata9tfuxZTpeW+BNbE/XKLI5hCBJ0sCM15JEAgwtt9zxYoxvdvtfmXulQoTmwW
FNuckw8DhftEN5bYM7B9hRBHo768s/uODHd8U6YuAOM8J63Gzu2rhaEZKXceLXvL
mYqTxn/NDpV0tKGfZyZpwk+3T7N9PfUdv3G+Le+jXOueb+iBDL0v4mSRCaENgQmq
jafpC60WTlg2XmhvDA7kRiymnkt9fCq4ozJ4pRfI1sJHPm/gaJFJZTp9eWiOLY29
XE4sGIx+/jAGQToqNUJzcA/zFTTwofs4H1YfYILgAem0ocV9D9SCKbusaxMLPEil
dZ0GNueVPqfGwCpjho2R33VijWYmKGsywGsJTedm07kd5hfSzsxZtmxvkwQaJhdp
jVulOP0Qx2qxACW+34VhLNQ2llT3h6TvesMfz1cK0IsrZxEf9u23rX4QrwlPJ+/0
OnMJsF4NV32Y1t6B105ePxsuM5qflxUyklGWOzytzsYnUiE8WQ23JjGWtthvuxNX
0DO4ruZfj9u9f60YM4a0dMTimA6IJjCvzNFD33R5WEoJKJmz861j5i2rhCQKZaQI
yYRFekWLGC3qn4ChQWiqsBlIC6SvVPfHYb+nZ2FUbmntlheXykiXEnqTE2oqajgt
FgXHJLJ9qdTD9J/UL6osquy7DuxHxmOZtjvEtHazj7rW3bM8qpwCPp5nF5QTEBJe
yxPWLOvWDbmHHPrec9aL9kCfB0ppiZXXS7b070a/vS7JEXQfGvUf5flZq6aTzeqI
6VEeHCSjm841EPxZicnESyGCcXK801aIWF5uXWa/rfxcznjWcaO3pac+CVsobnJf
Do/p3OQnCU7UShIEiHRx6KNc2ZUmTZw5+Mt19XKV2yvnlmYm3JJT2bx6HnRfsO7F
Fz3iElz59e09HreDKly47AyWjKxL2ooMrvzfMLeu3nS6Ha80IE8m290c3h9efNLy
Wl5xNVPa3ZYOrkdWm1inO9+WNQw6dlI3WCzWCbkJazaX0r5XTHTr+G8BlNbAv42L
IKpqGvoYZu5jj9gnMlCOGM4YLmaMxiCwSFGyClUkjcVlqPCeW4jWqMXrDYkn9ZOe
5r2pyjFz2y2XJIWS5wI7jeI5VzNTkIcKj4QrpLYy4QBQJS0RfGuCAhmcZr3TlWqQ
Byueqt68HjOuIgsS1s6rSSSN6En2PltbwXrDuD1RVq01wLfIRN4rDOvF6foXMrsW
y3PK/GHLSyxmFjnMX/FWFisv0hL5GZw7sAeol5Eq03hb2C16D7YXJpWY5fljMMSn
JyqOWkwHDXOjjptNjzH+XKxiRCSX1iEF2l3KDWASYeZFP+UpRVPIbOKzk3XUXCg/
n85o+3Rxb4VIe6ivO1zPlyzEBJTeXKn/Gjyo59VxA+Nytk+2r0UJe2m458/VyyDf
vwvMynRIv6rHgtCwSjz9ikUVIITzzWWgeWFPsn0DJzrnABnfDZQ7R+pcobmP67u4
ZzncOnFffko/8poQxQ+YO2pJAiU2oC1KccN9TQU5l9UiiVk4cp8wdtnQtM7Y+o0w
p9lJmG5FiUSXofUwq1mi3TzxqCXNs2uuHukyQy+llV+tzFpW/5vgDpLgTmFf5Qsq
awohzMdh0s33mX9zqouv/NuqeesnSrUWyxu/7lOMRgrOMPMkDNXKflGRyY86U9Xk
NE2RLkKIjqfv4bSeZHI4yBBY3e7I4574lmvf7iIPgoika9/Ndm7qaoNVu7vusK1j
FVyLNqbt6VraXNXu5EzHZU7ZaQA7JNu11EoyK+XrYOhxvOyMscfr4Lr5QNMCMyjt
wffkKI6Bg2TkKd8ZI2hDPT8vPtS4SJlSSF+MPLS1qvgXsTBFMF5FXxl8zjhot8wt
F24xuK10AOfntt6TyhbjmqM89+KgSf1IPwB28QrXANCAvkImogFkkdq7WjDotFod
cnDFQAv6cvAOa+eJ06lBJlB4A1NeBhIqVAzqUcRv7hqy6CGDt87+Pg/25fHZGTgv
F4wcMTpuA5ecvJyXlUxDF7kIChKE9o7f1Ng2dudG1cTlGRNSmVPCplHHVQ9SD9R3
Vc9jPGRF7eI8tD6lNQHI1xLGSUyy++I0bSAzE+bmatIqc4NKLDRFbG+21itiT7P7
bebFCw6AR4dAFNp8WOa8mW5lH6LSpQnT1/cpOvW297vijKu7wA4bHdXs7hc686Q4
XV8PV7guT5gOK6dHMtx2A08zE4iWkO5R58ynF7xTltI+Lx3QpDb+FV7IXtcpG9rc
L3YLD1HYMdy1BuBguhyvWaiUzsr1ig3Y9fLoPpN4mH0TbMjP+oos6pXU8YOvsZHw
BOr6/B15Q68uDGAOvFHiTmxUeRV5XGC9oSAoMcoyrNQV2E7vf22UoFaGFaEAUraZ
YfoCbr8nAoXzCOOlcW8uHJ8zaK62U3nY62u8ahwfeG1SfFa777YbGb2aDwquHv+8
DxNufmcAQEEBAHvVqnnQxw/1OUNCCLvb40BwR0qdry2k4c6RE8OXMOs32gJCHv0w
rRL5FmZtaGFBAxoik8KESnTg1jNYJEL4tgDFCuqUzRrsuSeLbs4Rzq4kCO5UItv7
kQN5J3KpATsRmcR1UnEQRMJuwwN0EpIGGvUDyiV78Kj43K06qAPajOJOxEXwxp58
Svl49ljH9zWU7oasZf/KCFWQ7eHRVj/vGvQQ32ecQO1CMqClCt4UUxmjhJqYnKBW
0ah52eJnmY26Vx/AeKhKblrm9Lph03Zhh+Qjt9pTjcXVr/vtfQofMMhbLSxhgIJw
hwjZXtdE+lVHGpccIGJ+qevAzLymv6I/+6rntaHE2eAy2/Gi+K4hj5Aku6O8un+m
fGiAMzXAleGRw2omHfDsxzwLZ//bv6G4zL8HC1WdPXxPEXjKGl1teVUMMYxnKZOH
Zhbkl4SmtU3Ldm4CDRF2u+5Z/gyMs3eb7V0754IJzyue1/E1ugXqdMfVM7vDCmyr
4UMg80bzTue7Grnie69/FS7OBsfJ9/y94AWs4a+irAxvcdLpjqdkM8aVLXcaRvOH
VBN1G29vjRbqCTsGoOpX+WVz1zWsoF9k9nwAmfAJk8R+cNcA0mbEniJfMPRFMHpe
HJ/R94VtRP3U3/QsY8YOCXWJv5nny/vLczXnfcso9IdhiTMo/PSlSCmHenWP2QnK
MyO8PymjHftzu3MRecelqyR/yYT07v/ElHw/qv3ckXGdjYCbLQH7p7g1vSJvTxw4
FApvD/W13V0EsIqwgN2Ech160bjivRa9NKympV4Q3BhsX2mb8Z1RYVMe27PCGN6f
jDjWxY+ibTDRGA58Pp12GDRQtWW5APnpMQ9CRV++lqluaU6/OXKaLEQ/tB7OYk3W
sY+4ZdSvk4gST7vMTExbN/9J353xjaNCmuSvlHGiP2lmQ8BDXI5pHcvM7de9/aWp
3r7VYf4eiDnyXOT1QrvtEH2us+N4H3zxczcYgVvfkqNtZ7XhUGHtmSktW9NzXr/k
o2l+J6MtBu3DJbIUMu8TNHNkc6ZFi51YjrvtcBoXpdvmOlB0iOiGt8wGv5SrxiJe
RZeGnGWoO+7NAhqEkDE/zLTFw4FCcag6JaidSztoiMI02tQf2a3u84a0B1p6tJkE
QuFfIL1/AGvvAMi2d5AM10r5JHuuRtHlRUNN32yM6WWKqjzv0xZhcIVk6wXJZQT/
+mO9REFngN9M0UoxaAxiErIqMOGImQEUEPvUBN1QJ9ubmxKmfmkLZ1GWIYKH5mx6
9+n/uV5Krq4hC1cxNRMTS0moklb9SE2mWBPZd6kBN/MUx7mcO7FYTmqxRCMpUuUO
RoJ1+xIY8JLAsieYvmt/McBt7cmAB+7A0T0JsTH8iOAp+hjDtH+l1drzo7DSyHW4
g/l6fcUry3CUHNzNv2yXOk3rSIPGrKt7f4YOfGyz9pn7chuiw7PwORg+l8JCK7ED
W4IoaAkuh5G3chEWNb0laOXsupPL57ORDdyNChIev6BOSCpLw+mYgBSnUtq12Bbs
Nmzs1NWo5qXgprVSli0/BVYE74dosOR2nPguM8Fb9dOIbhRhmWSFgIKLrBa8ZDR7
9oTSCyb0qzcOwibHGBUnJnV7XwQ5ofeyZ6X3CN9Kv34oqiISXpheyDG+OoB6KTK0
4Ecg4CTzqsCYjqDhuHFw1LKLyZsKCD56bN44bTxUcnHSgDrr3QDFrCFI/bXNfAV3
rmHpXZl74Wfy+xvXl263CpDo882PrM/39/ntyhKYzHIW3IKDfdY8Y1qgdFs1qf+n
vQgziPMUx9Ms/kae4EXiJXwDC4ORyKY8SATjVb0Ww+lLHz4fw47D9aZYigN3os9+
Y/hwkedYEi1xuJN7mNJXMrPnp8DKQIwP38/d7q2/bVL9TcjeI587WobAzYbHVJaL
LbkPru0D5GSioGl6dZfQcGbk7je7Gg5ODlYOog39tvniFKx2FRVzc6qNnDX9RXiX
yJiOJsrdMXoUjUlhZWVjYuADAVoLGRbj4K7MKdXmTnlAV5GS3Vq1g71y6cJd3Ar6
6xag/rCTNY25E2IEQjJdT7/+/hUVFi1XZxKxajZqGARH5J37JLnJPbtvi/AYbG35
DPCtiV1zzAeAuQRM5rgZKyef1GwoXz8bOmgD28eYG7ssMAHg1OKyIps5HmBZrsXe
WLn94UDLCvWTJZX0A2UDTbQQ1rCqUXIkwM4Iwsa2dRrjS7NUSsu3vcG7yWM+8xct
Nvvn8cg87tyQCkmwNDrd3XbU2dV493BXQ41ncfkr38Vm1lRX0R3MTaZcChU5d4eS
zVmP7evrBVw2/1jm5E5i0i662+HWX7sOfy4wwKEksjvvHIsFNiTCpOW0XRvKe/Wx
KreMMcFxyPmF5S75jifoCzl7gpscN5gMxpm4FNKkMwksoz1Vx0Cn+g/7mcNeLiO9
behpzkxYcdh1nN82BTJ1VtE7G6/vIrJOFfzoiW8nzfEY+EgeiYulzgJHsZT6cQLw
a6UklynxQlAMjGhPxPpg5r7NxRmGv4SM9RvzIkgyROy0wzI94nQZjdNgFR2v2YMQ
ujPfHe07c+E+R9RUlcg/HiGmQ1JHrg7HAze/z4XPVni4074HBjhPZ1V+hCbAcSrd
n0xmvpzO92eWed4gDLp62D/+uC/d8ATxfrxucDdvPwi9Z3S8lPSs2vo6bIz0ehQD
FFyhdcg0hasmwjAb1i3kiVwO+tJgmim2xkQClUWSRMuJsOnUn1OawOmK95lmv/9E
uu8Agg8teu5Eucf9CHVhYdhbRXAux7q/YLhnLav8PoNvqcSzV1sG/eTnXUiTygVO
KHxw3dJOUZkPItLhcVqPfYPe8zxnZr+HVwkdCmHwXJ4lic7jqRTvjdXrncn/HM+E
rUZTfUP7eoFUsDbXnGN4f++A3UneFre49m53+Sr9QI3azvYWXTsZ67AUeR/NM1k4
OylWsb7Z6PiOMOH5qI68OfXrJ94JtmOK52wqlA5Dg8p4VKwhjZ8kz0J7jOk1MDKm
Mk2O+lmxm5/0FwHN9+Vb2BpwypaX8mxluzbkldosorI9FVpO3ONAK5GptGLTNYxo
lHp/3SyhWmJWXmvh5tb1WMF6fMcLNYF2p45zcX7QZrge3176Idib31ZSyuJ+Pk3i
Tk40jrnLv6Snjed+D9j/BS1dFU2ekYQdTjSEJ88SV0UkfPi7EjYyyOEbSS6THsma
JP42NQNU9P6EbUllKzP8I72e6g8iGPtf88pbwLvnDugapEdGgzJQWuGg/qhJi70Y
pgZhO6fHMelgtyLT7wAbt9e+CPumtB5xSxtb8FjSORSahZJrOVeHCwmg/alJuR8/
ImHGV79FbJVkGEqkIQotctJw+W47vY4jAKvTEdbGSJleNMepBsdwZVLWnuYDRxPw
2BhWp6Xs4lIxBufq0FwWgQZ/1zDekRZa+Gmf24kgRYgmQhO+DfDdF+WEsA9EXQwO
wtfK/zXQkS4MSzqost0XsnslP7OOtPYQnpG94opAgQohj4WRHo0MMZvbWwbwViPt
uWFMtUNpzXBKov6VFCfwZWw72daBxq0dqJR0mciigRa45ZcP5t2YyF1w41LgGrQ1
CsMoJbUFdc+wrDpNnaZ+isQRgUVbFX+7gLZZ13LztDkd45CswZUF5oCIhG0Fmoha
yKokbC140cfjC3qz+My5k7Rxy5o7+WQV2STARWGKPoBpbWRLTAkGElxAnykDcI4l
i+U1Y72xSUUC+0ud1a3Zk7WCvqr2VVUalYiCZEMli8IDT2dhVLrcAEduM5oe3PDl
H6XwJL8x2pFE4yIlwPB6qw4sYD8HQFPSkgzzL61ZoVZjIDbX70MhxMfE9nV107iT
HlnnoO76a5G86l2AohfRpkNk/bHMIY6hD9mvbVT1sdFEUIo/EIrJXYPpb94lU4NO
SZkfD13cb8zN9557QFsLNcPKazK+HR65TCfHkiwCNfgTtdWzq7/8S7R1dryZduBd
8F6X7wAIAGtOj6B7D8STvs7GOOehx7sbdra97lZDihx4oVJ2eDZEebxZwCT8CAXD
7HFEbDbPQNxdzElSStZ3W1yDevYcqHMEwciC6bsAKfIBz2sM6cYj0Z/A1MLPHPFy
qbCBX1Gi9WLD4osKoydd1GML0ueRGBdS3Srb1joXN82VJ8FuBXNRPytd0W6Gf/I7
DtEKqNiArNem0GYm4BFzaq2Rwa6NR6GRzYlH/kzDgo7364+Ma0xxtJkgKCQ0RbzY
+1xMoIg24QdDoW2udqCiYqQGOAewdIKV255k7zGDVTFAKi+fQgIxa97eQABUTvp3
MtHwTWHVzG1sitF4e7vHQOpqo0wCn+7tvnByq7E2wcl0xvg70gUpIWFBObyMYiJs
vAy3MZFYRnViJCy5Nyf9uUqbdeFR3hbcFA7tLIqCXi/TcOoQ7JYVS1Zas3pOE7x3
6OZuXrGKnzmBrVPNPkY7wDhY8IeWCLizd4o3SLcIt0n3sb+9n8XuBk/DCBWLZ9Rn
cUegD6Wu5rITAcebiALMRHAn9KUN0gbFu2AFuAWGA+4UxLWcKnB7BskRzErNo7r4
FdjBnFVZvrBYpRc9fs6pi6254Nd+IC/uXTQJ2jDr8l5G5w4v0pt7HZvmyH31wYL9
LeDhPtNHeOa14S318H0LD631MrTVI/7j1yWMuiCqI8X7VWJwVtXhI1XySfCl9f6r
qjhPa/Gz4bFETUr0GshZA75lvThpxpnKsSHuXOwF+RzZes3SL2RAxPO7stGZBGo2
zO9C/wq78rERZb/G9NewP5IPf8/TTw3cifuLzNJVbxCHDEOFDS1iwAB4cAWX5sSx
QKbFsoBVGN+ZwdsbTCmd5524KVXlY7ZcxLXZJ8eXsTt3116vgVTKUzezV0f9zHFm
l8ndt6PKSgTCVqv7OTUOZd+gZFDO/c1sogd9jDKXQjp5ixilYVtpa4wiIg6FVn4P
VQ0PR6Wt6x1ImRwv8819/IZWMxurMDsHkjOw8BaAps1a+b41QNRMo0ZDVAMAhgkg
0zSQqacI5jRmkipiUKUsBc25xQhMVv57OHnd2J24cMQkZCWklcNmw9dKWk2Ltk2P
XFd7bZFpVWOfZ4dTwJf0U3O/Rvh13bZJzwziGHXwy6gMm2BYLr2cBDy1IobjeFIX
4up5b2jTiFPehiCV4mHTcygS6hzBEOSxozrivHzYI50Igbb46Za4KoOUWJtggq2K
Yuak994jLUWj2pQET+MBXL8LfFdFgXAQKFlAO+o5/CD2WqFUb1TCKiu+JWDfmyJG
gQE8WFuidTGHa4h8egW4D5EPk7tnGT2/hBk5KWVGlBSQrXrDPWcSGOWdNNPeIVWS
CmDvLSA54KGkExW3rgRwl4k2fmNfsRxpr6AuL2THlWgAUEXqGCIX51QQ8yRkZ17t
Wu/hrs1+JOkHIHb7uzBaZDiVMzIKJCvJi4G7g3LIyNWDvpqfhuutEDJJcbdl1vMF
ZgoXr97lot+Z8MHxTNfZRg7v203TOM/H84l8zMpjCS5To3bP82WBTeHPG95XgPtS
VgqsGboyL+t1Rvbly+ElcU8m808WczPntbrDUGp5eRAxsEtN57vYRDgtW/Gzv0gX
7GO5aGGTkh48FNuiaaDUQNpGPWXyE3VnZYScch92a+J1cSIseGqKMYpEEb7Jhzel
KioFz5ky9YwTogEGcSaFnehANrgPEvZsNv7xUjWiVI5dWzbxyHbXqz3BSkkaZRap
jVgI0sXzFe9nwsuzne0h0OOyFM+sJIRHwKau6wKeR5vmg0C10gQw9MDRH2jKqxmy
nI0nlH4s1X7TFfQtiF/+lZMgsQlpkmTdbLzVQeyERlL0tFFuI+5qDS5lLciYZ1Vh
qWECFhPhpglwaWxT6R9Au6lAuyGVo0wQcWEPlaMgsYhpxSSwqGm86wiq6BhF/qiQ
JFlHs/7AxHW3Wkejdsc8cDJqN02C1t5Oyu+XHn9N49rHJfgNG0+fmPqbzemYhZPs
zgj1ntjhTAvOVo/hisWpETLfHTXVMPr7hZhGIXJxNoksCB/os4tSu+cnHQERNhq7
6FvW2Als6OmJr3PgYPBLKtFtJQposPhs86J1Bkl0Y/SztFLJRs29tKLJeqrHSlll
VevbVWTYFcus1Qt9EzBrh6U72BFX6TFmZnxqgrFZXCf3AMCJA5SIOfOGDerQcRf3
Tp4e3Omfda3VbqQD0YiFvph1JNhFxEtNE3rL6CJVLiWo4NCRm2fXT+mIObQ7NkAO
7FCAiDKYlnKOTJGIvhu5y9tsxGAa8njciAiRgj5fOpZjF469MiYQr+5cjlWxkTi0
OrwXPDOhvIPnwdYCPLjTXJfLzeSiM11dRdTFqWrd3Anedu/n2pncAdvEyWOsfkz5
Tlwf0bjc9UiEcuiXpK/SgONpvrMLS9tk/IqjNF+ayV2+BkFMJz5MK4f0VwFAFRHR
4nBZVRJFxUD5xxNMiLacqeB4LRSpOVdTVKKl+2JP9SOE36ZJExDci6C8mEc0LBK4
f3Zuh+v6dX0uQ9/uXQz293ByupK7zX3er/S7ZrK8EV0VXH66fGgTvzeRJX2eZjjX
i1Jyb5msIqdw7J7F6e7/MOZM6LnB6St/1OGot82ZU0GqBhgVLdczoMFme+cBGqUk
MqtljKOonqQwv6zramm8x77s7Tooy4i3MP7yB5fzyMzPhuDSqSet7TmU3RUbu+HC
TUELdiMHKpa2UPWZlbL3d3DhVP2wpcgcnIEHPpdJTlFaGWU+ShlFTZFhYSI5QTsm
VVFfxgc52Fn2IcX+KrdSVKb8XeGV9Gb90zhPXFTJpKlX0WBVb1VnZDmOsgGzwaoq
DA8f8Kv2U35UCeB2966VOkPVre7sVR4TBYeoco2nZ8SHliD1UVenpCl3Fv88QipJ
b0yTQytL2jFzWlyOx/BBZUvgvaLyWIvMgd0/HJEABrLXLK8d8BXxJLZdPGifn23m
fqAfxjnImHLZFUuKao6yjjBv0Xfo1xnw3tc3Dk0wQpdbmnGULn5VcUOwVVUe8687
jiroY5dH5DdIit+w59GnqooqJQYcsWiZqa7Uh97buNiV45YwKiT9/bERQSRaN9+8
51cTu5B/BOxk/CGZs1x4BTJkvN/JU5ZI4WiToefg/SvM1saM+Lyiv05W0FyDQjnw
JsJbS/cv7Gwfb2lRlFqBpXS4fuXDxE9d9MmH02b32tdA/0ZxKc+LU+S0uPHHBhdp
1Nw02QtxMFP6el9aOSr6VMHu8vp6MFAqqNnlW2U9mI0vS4o4mfEgiHOZKNyj3WRx
nzJtmcKgomLQWjrIHzb6NnKJXCzWWX9YVzCx6Sjl/Wolqkz+X+y9dVRey7IvSnCX
4O6uH67BLbg7BHd31+CuCRocgru7uwR3dwnucGFl733XXmufc/Lkr/duNTVnz+pf
d8+u7i7mN0aPqvDv9fV3oQB0LZBwbZjwnWu0KBbLaby80B7tgku5A9RcuuTQShMU
7b2f0T8n93YKrHyKZjTCSEuG/KQCycz9WwbcDW18dWMc05+oTpU6RvcgEhE88cE/
2HpuP1D9nG3enJBkRlSgOkI90f6YpqVAVxWltEOBv/Mk8cxfU4CXUqxPggIul8yt
mzKv4zIlqVQFnlI8TWPc4mnkm220vutP6yLSLwuUDwr/rj+wDJidLoCSfoLq1iNZ
pd2tAwueLKVfoFlZXDjcUd6ET8M0ND3LLn5G15jcL3J9cSMLq52DNiobHbVA4DNQ
jnQklWI94fiGO3OPH7H1wTaogK9M//IjEjMi5sQpuR5sMMjYOEUNTC9+PL4veb8P
FY7vT3LuWc13fjNVqTSCkEYJIMnwihaouho971HSLiRqqvuqjoecR+cqJCW8HwZ9
Pxe7TS5T63jcHyTQUz00PteYDufVqU+u5qx6x68420ziBq1+uL/XFWuq+DqWG7em
ws9Jih4jb6lhme/EtH1SnvuzYWC0XO0UYWgO92AC+3bxsGfxMDMFOPDYN7VJIzZo
1V2roCCYlz9VKy64Clu3etzEpcC8wNrP3K9sfvrI/QsPDY+B50dPKhOAKkgemEVr
NV/DQuXUgplnb+VifV/1ot5ZJ+qFCtk8dN580pzKIilX50n6bOkhqYfDyN6MEftx
ZJeKMYlTEyaVqjN+155b5kg7xKIyYucDanKcnJhQP3WEvSLN4c/5BtVhcdnhAVJd
mXUknoiDw/Jx/c2IS7IVMfq5olbngntZ6c3OYoOQNlNXq8PPkC0Hqy52d/tbA9sb
y7qwhO1ilpy+vJl1eitY61gQll0iKICeXUfFD/byx6PN1tr3DE/L5/RWq8/5e5Ht
B5SHGd4HM2DOE4se9PiZrlOXRIbmTtx46vV7Nc6r3ldGVioIfam4IMJ6nkHSk+mM
gHl1g5Ja+CoqzyXPzqSqkLyzE6j1BotExkX2H8s4J+Gt+Y8rV7ZrCrP5J6//3BA8
qCjGsCPI/FM1RcE5jg/cKwXMZU6BZvo4Y6c1gprooXSski3SzJ8Ub9hOES6rpXLx
Box6K/khb9cICMQHjso2hi6viZR4Dr5RJUan4JbAR5P1hdD4cqam2pUPw2b2fC0W
7AP0E0Ki5cqS3gVzWXh02z7XfJMHWjUXvD1iV2aHQdDDPfnyITvpDiViQuI+mI+j
I/8q2HkXkjJPKpi0JfrDPV+O2xFY/Ey1xdTAxVTPPow2o4v6WvCHEB4YMd5JzBu5
7Zv1Zoxhdi7dbxxCiGn5TIUvR4JF3t5XfjdWpq1leioqRz1FKh9ajgPN8XUe5nqr
ZKwyJwNt/b8eB60P341qtHk8dTnDn3FgQ9FhvUtzZTBGZtaJD+CxUWGhlOoV35mf
FDAMsa2dB9qOPNVFJLYVwB7LbGYYC0vDp+CtHwPdXhl957uy3jEq19Gxbist1B+U
z4UOkR9UNq11yNE1eqtksVan4dlaoV3qL7FS7lnViPpO9TsOdMqlAb7TAoFqeUqK
ox8Ww8lcOv+po2+nJxYRxgvJMALQvM1HIJ1Q8XfjhZhhQ98VIBVgRGxriyjkRqIW
PtEZZTMflMjDXKnrqjneSHZQhs8PjKJog9oktiNWwwNfnKtsMjkSylh8jDzgBKh/
bgkqJ/cIsBvT2m342bJQalgjoLCzPqgHiJKQbb0nEaM5DLc9vBBuRx9Bl9Pl3B/0
3NY5fSJ6gnN82b+Z2/Q6sVdYtGRic/Ls71W7l2n1nLZ3qDwdcBLaEJ+T1Y59tr9f
NbPoa3W9XKkR3OUBodvoRKntxF/PVqbdYJV3/0Y0Tu0zgu8bRBulmlGF5Tfz3pxq
HDMaxIP7o9/EAbe/UuVcF9mBrnidRG9Z4Nfa+kKuzUkDnZhwxM/u7Ym3BNcnOiNR
6ow4JSuSJnybBu/HiwmQN9DQ9ELKEWHY16PtMsWhOpGyhkYA+LP2uFJAGSE+mPGP
BEQn/XHP7e8ao7bimOZ4w5X2UzXCEGi5o7ipcAY5is/ipJY8ij+T55+QJBb3cCZi
VzCJtIwCwYmzcAp2Z1YFlUNwq9WCLxrwkQ+tPx8q9GzCE8S2z3wrdeHmDq2xHEJT
+ZmYkCQFd1WGw3vUj7SfGTGEpozQtnRXYOpyER6xu+NDFJjTJ67jR+SyNPa+ZN5C
eWl7h+jGcMetbvQLej81G/nS9hmWvc5N7s76ycA9+AX3BUKet6sFz+Z2j/+Gfyg9
9Ypma43mKlubtanWnc3Fz8f7yZA7ZIndQ+OdMRpLOmval/Lbi8eyzVUULg/ttHz/
Ywt6qKZLgdgCAMaJZmR1rLQdSq87RJNckWKnblNhK4EFwJVHSVgpj6jtpSDq+4eR
2SPzq4FtBvn5HLuKwT1kCymTeL+SO1CNTcJwPeqOJLXaXo2z6F4cDRAb6aZ44hbr
z2loMX4m6/wPSA8A91460WPHawCig5/e0ZouZIUgKLadroZxl61rg1UsTzSNTszY
vIadg5VlRBVbd/AjRNAhp22gaKufjRDQWMjRCg07IOnudjJLliCMn8VjIFHmE/6X
odTQ9+i93iPzuqU4jRu9V17YWl/v96aU2lou2q/Ghp9NDulbPX5+xVaxXPR6qlnE
8tsMpTKW2k9q9J/xegTKxcY34albeyCebSVIeKq9WOMqa3nG2vU51NWcFTA70zIJ
qqGO8OSwxtBfslgyk8TkiugLzw930wvHSsLSiNCwE+6LwMymDH3ivk0APgqdEGfr
MC3aM4iT1slBdA1rVpIeSDu3VZulzIjFjNE/l0sdsFNG0I8Devx2x75NQAeqT6X/
DrzhG9aUYSE430wX8BqO8ieG3nOTLkjYn65aOgWmRIg4W4RzCCqbHCDqrTT7Ag4R
oJgVrS0tWs8PMcTGPHYbR0FLSTYwlV4baS+Nokj0sGXau6VeT1USsdOelX3aLVV9
fkexucpbZ0qLFf0Vwhx5/frRafI5BZUoMB8wwdrAA0v05OUSXdek/Vxd+D5rQB4H
fOyGPLrKHo80mLKxRNH0j/KT1bSHLsMAi93GnVslxxCti6OMQzrCm93q9QtP9OZE
82Bo5+i2+Um4ZvzYhc5sbYoOk+xy46g6IenTunkJ16odf9VlT14TbRNM+ZTNOmhR
Qhcr008e7n3miaXgVZYaAsggRGO7FwRkk/QQ66YFZbelH2yo/mDEpc1KCatFqyBy
IbMQTkEiJYU57qRnhplLTFYzQbf6MC1LVF4VLFPnD4ULckYdXdz5RUhr5scIS0Rq
d65Uco9ONYeQ4IZT5kUdTMji+qP5SIc1+nvt79Gy7+WSd5yKreQhEyHtwpMxWmUh
ToJ0YopD0SeyA+w8E4TFcb1a+Dv78+yrCBNN7oxoh2PK2UPY+sbGHC8ufiSnrH6B
rCbpRCH17cyCdzsu9fhAu+sKRMY3916LfLSsPntLtAqFXKuTBYTLj8nN5kGOewUu
XTlyXDOVyKEDXEWh09I2oODHAZTc0Zg4GVJkuyD37aMbe37QKuhXCGrnaaJeYhjf
u0PuSMcolQ9Vn7afJlJW3I7utM4K/ROfm1t0ZwzNwftD3EVlUibKrfvSS/Wu97JM
QU48vx96zTgd1+jjNzYdgkhTt6PvM62FJa0UNKCI7+otTsFflU2uaubnMNHhmlzE
K8MENEjnIhSIPvU9YbbhMNVbWpUxFQMJNivHTRtVoN5nTn1CR2JnQGuRYLdwsi/2
2b9J2FmjmaZR9W3gq15LLhznH0GsZYDhYnwZlS7AJCTZeIQl6m1/P6yutHoQ/nVj
jBsLPl+aVnW5jnObd9tY4knjidI7X+eaWGBoE7XaFTxluTL+hhgKWuQS+f2RNvGj
r3nfF8PejPgq0TviVJcdSthR11i8Y+QHNI6GEIQCRODUBwI6h5hsaFs/PUKkGM6l
MzKy2SJ7DCnwODxbCjPgZJfgBanRJZKLb3GGoBQkRhy7tvWfQmd5bK/6RqKilKSO
DWHorVyVpZfasr32Cwaxm9TnForQEFp30+iQCplg3awARhMfgR3W8aLmnrY20mml
ibmVNc3XZfkU2a/yfAwDTvS6DLSydUutWjtkS+Bt4H9en80WEacRt1w9Fw4qbrrU
DMxv4Z7qFNOwjsqjc6G7G9+VZeJlS1doE3b0mDV2Voollwyz0lZ+8dBVOwUaskEP
DEiFh2Ie9/9hPILQwsBtJ2JelwI0nS/0Atq+yw/kQQXkYFbamXWgHfxhqugeYzhq
pa+d2OWOVPMYzIKaBA07npWIaKNcLSSOidNXs6CJ4zvqY5B1ew+seT2pMUT4Jbzd
FXpccopsK3MlzbxD3n6fH75zod0iaFhLsq0fYwe74Ffd+IovdIn6WnrZINcFkCyv
v6A/HBUuel8hXa38vOGKzJU5sdSoq7WctTxc+EnM3eNcIvmSe/hz1ToPycxz99jZ
66GoblUgaCZ3d+juCz+5k+nw+EllAc9U2FTMd010iR5VZmWzkF0lN6qLwC3aCMtI
TPBb8AC6Ky0ss9cfpl8PUrDUP6mafC2ju6aFdexdcfQ+emG/tdoKeBDacqFBvujd
zkm+vIyBKFA1lM0vyEh+SU9SHoHHhkU92ZlwXd8hrOVbl0NWkkounJ8yi9XXg9bX
46wg+ol5zaJbLKVHdDf5bs7S6gbdOI1ioNEDyKO05+5TirKsCmqRHRrS+WoL17I0
bkeEvTTu+gz76RQHcf0ZmDRuBR0EGpRini9FKudlZ08IDXGgwi6vFmdnvv9n0Gj9
OtG+6RHFClXSzrwwXMgGXmvzUnezdp6LGXwtm6sK7DyLg30Xo+0aeu6mLENjt9bz
wUDbTVYjPBdGz+vIIXCHtIR0To+949W2pxl8dvoWOOjZwy+CEK4K2KrrWd8lN+1q
uFF4YVhFtQkPw+H9Jz5VN+KIUMfATtGAZ3wJJ01BulNBtJdDp7YxUIKVepJBc/BV
PmvZQVQWn4kI3HboOKOL1uoEE6mkPuqkFhThEnV4UADt9becFjBgSdMeze5kr9t4
VyXQQ3SQcmhBRJNryhEVPPQxozjNVwfVZum6+9udo4omh0l/tK9KI7HdxpkhOoJL
rYuQ1sV56c0txVSHTCVy9rjEuSlbP9iJ37teiYguaHL0YTpVw+YhF/N1plL0QZ2E
YhGd8dNDlspHz4z3AqmoCtSFA7zTDNPs08zT3NOM043t5e317dXtze2V7QvpJvS1
6OTQYTASD2jSAJZkY1KjhOLgMgoL2sev+0hDPKQ3SauLh5Q/7BPJwzI6rW1fqNY/
6/MWXaA4gKh6jSaiOIFkwYkqTwS+3iCEsOG3CCMF7UXM8jBCw2jIODAkXAzsx5oJ
nCNQQQfv1kRBHH0Bvqa+uL7E79J4EOFooHBg+ifa84Bgmv0azoDoAyD4/E/6Pt0S
04j30DcBBJQGu+S4nBtaph8LCllFWXJ58ndoB/VddaPwzpO4djK5jbv6vxHb6znY
OlEGuSdnqyrQwZrQeTuStjULqFYIxG0046GV3G77As0AdTzpP373+VkAEYBOAJTv
ldJaDpt0Aj+LQ5vt8wE5Ho7gQR8ceG0TaE2iYjOfhgIvASFDyN7QmLSoyKLEIGEp
RU6sm8meVxZxKJIxhQRo5R28gfNgH/Sx39Rxlvv1F4aG+sZwunOd6DWEYUwdsD7I
bWicLnWnUcN3TdTGvmeWe1QuN+cTDWC+BnbzYICBZvA8DKzpNE1w/Mzx6W47tnjj
1jB073ZXvHEEUknqE6SQLhxpdsX8A3lSLV8WNKLe957BVDzRwkvsI3U9gjlAGrFw
uXmItJSsyQ7iHEJZZnhJe+KtO4kjQv0aanYjySwC8lsFkRp0Urt1nGjkoWcpLtOq
cmvflz8P7ZWjuHIHlcMcLhzVrZYfLHwQ5nV/6gD4PyQt86z3quSxyycm3hWhubSg
ZmogrPC6Ph+y4d35aKNo13tcl4dtPGcNSsyE49lqiTO7nsHZP23mR56iI+w2SH5W
8leRSqvcPkfnSEMzajU0HPSfS7jua+kGxQkn/66L314G+g0Vu2Xdik0uxEXp6IGR
X0zMqEmdD7pgWs0gE7Mlc0V1tVgnVOxpZM7oHWaLUsak80HURp1o/f6IEh+QJg3k
mkaFYsD70ruw2FOwvMwtiI7dd6kb8uAbOjZ0qcZX6E8faoEOOz2dRxvGmUHrILJ5
oaQkeWyTsZe4KQKZXEWVEu7J2KJjB4jw64qQPevbuidkji5RqX9Iwmkrc+nL3ZXU
nSy0LCbQhHC3CuMyP0Cx2hNP039cbag4NM4e9PcIt3pHzzXqjRwfOS/hh4FNbCGE
Zu9alKmYNvk99eQgJwwNS1MbxtF15CcrB4NkzqDG1o1tDwtFtV7GeJCn9Gj1ekQ/
bccd6APaKGwm1MNSqojNs6cy8jXUD/BdY5fxICv5XlEuzyk2LOwlThYEFT//fD8L
UxtzBtRh0O1vuWLD6Yg4j3Xser3ZvZsiQkJbw3LwBmAQte58LhcFYhUNp5JOA90U
1Z+IWb9mOTiskfeSd/cMvBSeCPj9tC0rGvkIzy/Er1ajdqzcGjsqWJF5PpiIWIGF
c6uGf9JFpQGCBKvXf+cWBuD46X0bsFpOH5TbqNTWdj4A+N6wfFRvtlTfBF7LO+l1
tgHwVJ/j0Wo6OeLRWwqQOlSDg/X8yCA8ufsFF/mJsS50QwG222BcLi2EQsRf4Kt8
/4RMoZhXuJZRkC+W5oKtMMGlHf7nWGDRiJAL56LsXkj/vIV2pm5ljwYYUQYDW6Ew
XrNeMS8WSv7AqjEWYg/w7jBYY3wztoTLYjKAgZMEJSWATJIlJ2pfj7GTGfPBAgsO
rpfDAT7F+ot1c6KmYJnuLGYpi7a+uuhsRc3k8f1VIFyv6ABIb5MUfSy5ZFl00hWX
lHWsztcPJG1snsLPZpwS0imDZ5xkvGfJH8U6p8aYA03mCrI5WqahZXM50SF8degJ
H6eh7h3Uqy5Mmc8yUn1XwirWDAVsN7KJPn7NUh3+5IOKTw5gFQuKC4rL8QsS/nk2
cf8VEVbOgLkhQgQZJx82FCrKTlaSrICGyIA/nw0TSTlT8dOptC//D+bbaAwvZopq
Df8foGcbzDmY+pLZYDv03n2m6ISVWlJaUvwvA8jcX6C71e0/6HXIddWdPWLEjkMa
0tZ9pHbJ7y/frucKAKoAucy9zNJJpegcfFBx/6EyEFKqsUv3tT62ZMzN1yFY1RNz
bj3+olG/KQ0DVDfsoEpik6jPpoXcqxc4FnWC/xGCFgeQng18uPhJv8DHZDtaEHmX
LEjoTAHaLbwWN1u3xkeXkA6Hl8hnlcKx3ZjgkUBNZNdnisND1fOl/D4d8mK0Jy24
bvO0O4QQFNrhB2PDVDedo+Z6PUybKFAMxZTZcxyUwJ7xOxdpadNeE68arFHqnaP7
+Gu76nL1GbVwOq1+DBuqW4BpGiZgHzz/o2asBj5rwLBreULopWFgTkny5QQCA2w1
XJzIHvMTRZfYhewDZF/uKPXRZhpMhYxn6QXn8tU9amBLo+c1z6j3/iiWxHDke3k9
2tqEubA01JPnnIwLrC71LpDJp0TjfdbakfBtwUrRurFr8zvPZYjese2xY2/79Jmn
T7ApgOY5FxI7pS3WmEXhk+FMy36DqiHpDYY9OGE395gIbFjWFoPcRKJiz+ayq03N
Qegj6k0gr5rZ48mvw5EBlPtfKKLYpBxp7IrtLGy+4JBh1vfnE3MBXjA3FHzbLy2i
U9z8vH2959uidxKF9qK0AcmS4KAvXxSDQB49SYi8UsfV6CZ2vhzVzpnDtxDmObOn
iQtHAdm3wF1oGtQ0IKlZ+WATmjLW23JEQQzKQTvxH6RVdpyUzxVnuUv/tPXnLxOt
jho13QXkkt1gTn9MKfHAVK50GjdmUbAID6EDlLASAmVITYbf0iaTRk7PkQyODX8X
SPks+p5w73J++TL8EDaACLgaOFuajeWuKTlxPQpZLe6lrQ94uwC+8YPJ6QshiliU
GEG6CwOiDLHCBBTc8cwX0l74T4I0wpWGkbVx2tcYAghRYToQfHNu3o84nlegQsXY
jKLOB3dR4N8I8An5lYjE+qM5WhXwhxI55QbZto632RZAlBBvwOs4F/JOe07nRO6Z
Wq/QZDi97W3ZvNJkNHf7cVYNQwcAz9ScRKNioH2LjKfHtjPRdiSIt9LoUXlWW6B9
I0JbmtTIcmepmcGqJEkyoCTiPe9xv660nTZwNhw0tGjca1YbizZ6vtjnegP5u94G
bNI6Kc2CWOMb2Y969Ssff3AGtaPAN6fSed10+84cHPHGdotncb3rPsuFTIeaycjU
sMmkRujJHIkVsR1R/s9dNqXn/gztAe+xFgz7XirXgE1t6/O6eeZbuwIyvk+W4/Io
Txapb2PWGnK2KLdVzWlaUNZe11zWXFfw7DEksUtoortjp0WUiox57HrMeow5NibM
HOLMNpXdLBktr83tLe01Lj/5mKbc+TSuVow95e5bn3irNU29/Jip6WZGEp640Tbl
YsI1CjSlpC2B3laRfx/sUR3MiFjIx9wjC6WU9V4y3A9AZQYbkSGE3ovLtdn7mU4z
hgASCiY+wUozpn4yIjoa4z26RbDpYcOPmYQ4yYedH3n27rvL7qup9iut9PgfVBtR
n7Rl2BXzMqYyNmLEfq6O0aMEt7ctbBMCg0TbAlV9DYbmz5hd/ET1wYKPrkDA8icF
hS1K+47i9GbWobEuMY1616Gu7x2DW5LjXOd5SWj89j4LrYIm42xHr+r2E74Dni4I
Ibvn90+0RSKWCnHf9YVGioCnxp9vSvgw17gSBVgw2XnCk0ilKfygkOiBe1eUESet
65yKQHpLl4HvgMUJDbdQ1EiIgjl93YjnSeXxfbluLsV+msClo/iQl/i6V3Rx3+Ha
SQZkAA90QmC8xNS/f9cEfKbbwKiNRElw8YP5EkIPLJ5hcoUMi6scSUg4ALsTWZxl
WhjvLrLmElZZiZmTpwEbe1U/RrAiQ6Lha+t97bCq6MkBF7E6fvIMQrxwFf3ph4El
5B/eH+gv80UpH8KJ2uYDdEw9OqiC6ofRxb88lqtN+z5sFpFmd8gQEHfMBLKEi1QF
D5aAM6gMIsoEBzCTkEdApb+n3G/m1hv+SQn4HOsWOfbR/hzmWdKN7vSCJ0uc7dyI
kqwvt26S7STQor8PNbtScG2G32e++kCWJMRKDSk2i9nGl4TPJgsyTNwYNqlAMpHp
cso90eJmCiD1zlZER0B016EkBAa2XRqnWnRuOeZ8FrF3gua48lr1oYTD0kGDx1M6
xXBQcJTwOCYAB5+5VM3Hqeqb1fCMEYMTP/EJyQg/JLCZhS+GpDddTNUZtyP2/kst
HDlFHlKgyCAnihbAI0gly5wG5B38rfGA2/v59xrY1AbCjLmeRMyp7KYQcqdX+nLk
xCirTsoCtmrnQZEKa1rFWcQ+g/ebnUE1CzpEFt2Tx2kuTgI2n05OzMpKwkPZnHvt
xfsSjvJTEEovdC7gB1i8ed1tpb3ALr5V1yR5INsGv1Q56GV0Kf9gZqhVHB+9zLai
3jeM/eieUxA4D+panJh1bsh12Jn6TlSNzQgP4xOUUyicgLs3BueL+LfwUT1pP7kC
3Uj+KPfU3I6SDB8M/Lu0kAQ0dHYSmhgcHmdOzMMmT0u7HckDehCH1az/4CHynwFk
GBkAHOz/chH55yiIv+0iUlZKTUZI8R/BRQSsLQz+g59Ipjfvh/83/UT+W3CWv/uJ
/H+Q/oeW/uuwLv/0L/nmFfKP/C/vjn8KGfPLs+SvKxM7xx+oNz+Pf/bk+IdS/q7u
/+zJ8T9r+W/uHKE1aFkZ2QlomdhY/+nOEQD4SwSX33Pn+OcALoA/wuX89xFcAIz/
FsKFjeN/O3SE/qtDR6ZfoYr+pIr/EH+T6R/xN//p0PG1A7a3UDX/g0PHGjcoF0Xh
mevCxrq6nDoHzhbD/ROHRuTJECg1KCE75FhIERK+duZkwndZDHSgUHThIMFZGIpZ
9VxM3XC4cg37BGTA+lNjmMa2fGnCT0a9j0zskZGuBjsKDiiNbXVWEFN3Hs8vdy+7
d9a7U4XbzUr50kppGkpsTypWe6RMloQh8QlJN5cx16DQ7drqrkreBAmjNISMNE31
p7FDCqarTkTLuUmaTsc9hQ6yZJVoJSfHagkff4j/TJ7uF8tVQ3XpOBh6KBPPfcrw
SdKpddpWdF2zFnugO20w+u55DzLpS/1qSqUGkkrA6Q80mlq9qeA8C1pPB1coXWfE
489Evh+ZEwouSb7kuC2Iu20Y5DOqC+S8+LUJceYIN0SeLt3Lr/2003jKFymTA+F9
TLrXRHJVO2m6CKOXTq+MA8BUkklpowAZf0ljz9iZ2w+jb50zmbUT6vjax71UkTtB
xCP8wGeCoQvEDOqXmZsvApsIbYiytD7lsoRagiERKSHTY6xsdpfrrGTBQXKcu60Y
ctRyRkrkfho8SdN9E6k4+vGsch8rCluhB9z4c9sEhCpmcJwlVS2QB7kJ2x5YNB70
ca4zv3g0CQ8hD471VfZGn2xMyQQlTyAdFWSUTywB1AJvYCu3CL7Mdv/4QQxSnBrz
S3DgYCLeu8HAcfgF4AUITuDJCfWAptcmAua6KNy/1F+WX8oundSx5YnzZo0Q0PHw
sfb2Ry2cYleY1zZ4dyeqZTIv5DYV4naLJ+z8YA/OXuACavJn717cyP3BglwbkaNG
fRS9+i7XmS8G18QOkvDHJLSegFefWJ4EhbfgUmLmeis6fdlHYZGj9FAn1XUsPfky
B7DP/fSWwGMgOlDpMK0C6sJoUjKG3UZlc37XWAQrBIYTzChsH+m+A1knesSXhFgG
aygcWwSjo6p867MniSLTi6NRBJPLNghWuQWBIBVmer5GUmgct3ZfSleyVV0gw+yH
KqSNtnuwDMplDrdNnomLRIrL1SufoHH8loLLEIbPyaiqFhDqIIyDymIkRisP3yDr
VBgvobZWIp/ei5+El6Wc483+fuAsCj/eybSASzjXxMvJzGwEr0KVuhdbatIi/vvk
MYbPYk0vhCgRE1UBgAhVjiO4qzcFaTH8ixYWnwVQNqtPDFa7GBxf4bvhD7FW/AO0
0ZRxrPIZDixwfk7EdHlKyjjgqGGE1NqyigAyV1IEWH1eSAXGrXsRSeXMr+Qn/VPd
3MRG5sJduqY8tEC2Dq8TcFyo6i5LNdMoz7gxgObTyp53qDuQhoU1tfVe0E510Jcw
QNcut9klUcfykpiWrDID4wWMlyq8e3WrDbVrJIqA9pY+/9Zc4XGWMh1nV1QhzK+N
8FZIH94bIYF21ztnOdjWK7pNcrtgDfcDlUhG20hfwbtH2hwV3yhfFT9efITWA/zt
bOJP408d9T2knEM6kaJDeUTPPxW703hQbeupsLoeSZ+Jtr+Frvqj+7T191HiP4LZ
INyyn+ardGRsTzPDeLygvCB4iUnaPuPw8jG1i24oZ/phsUHW0peiH31lz5U/NnwW
fMRsTfJA9OTEO8v8GRIj5rvqhHgFeMY4jdq9x40wfSScGfjgO47YQsrOcdt1pi43
8OlRtp23F+Lu20ahUufHwkpRKoSkpMTTGOB1PtNvrOXk4ya7dV2+RzuqbR4QnerQ
NsN40cBYW3Xd2+o1Zyj3JPc9pjCdhLQzEeUyYUgCTWjIuX01qiCrIjB8OI4WwJbg
lu+0ZBg7I76d+paCeOoM7YtagOyZucR9ILj32QPJkhG8fDcBIYSP6IklUL0EIZQR
uAeehR1sRdDIIsSGuMznADJRQhjQ+poxD3YiWPA1gcjSEqwGmYAX4kI8xsrCfROy
BAD/kbIIUQj+SHCZQK/JJNiOYNCXAiJLUzAeRA5eiANxGysL503IIgQUDIT4jgAY
iwjoVxYOCeg1yyc451sOogvRWUp4xPdHdhbRieA1y9INiojMJwkEyCQk8/kCpAcc
DAUHePcmfDzQ3TfZpPbBAduiIBBl6ZfjiwS2Q4nOxnp7fMfBOe2oCwnQ7fXFhXDC
mbOF44I/Yi/fbI80n7MViwThKtVVIlB8S3CZwH8kM0jU16QkCPsOANqNiCiIpQcZ
TEgQ6IMxiSjI9yrMIQT3xQDVQwzmhwNAdhMg+vPBmgXzE7wKpxBfZgW7yozTRJrN
79BYpTZT9okjrLPqmJ89sWZuHatFN1ezS7BWxWqw2pKJsPpkzZszHkXQbmYXsLRs
3sHwDfGb8zfxP/DR+8CqH0HqnfrFNqsPJFkGggUuB3oGosM2egZCgdTto+85H97s
64wfXu+TX3KPfxmhTcb/bJ6Z1g5YCP+pj6hNBIldrQpSJtCk9LNq+lbpjIpUn/Gn
LYBLflibwughdH5Ub8ZkY5dB7cLh3fdtBqBDxeGY+ec6vpqYzvmfknX4t/3HUaJm
j9lHsqFSClliXqBY4MfvLMGm/aj4cr8x9CN8j0ABmSncklFyhWxGRAEF46vZstPN
2OtnoNJf6rwOb9YjjDPJL4es9z/rtCufcFkHLt/d+Ez9GEHm5APdUxrMEyZcg+6h
s+QN2yOTP6dg+8Kfkx78UNTeuPHZ2FcLg95jZNVEV6KfHsakD0Un/B36vrDti3ww
bfhDvq/w5mckQq3wwE6KtEDcK4BNN4sD//dc2SVemMk7W++0aFb5TAyXvHx5KR7c
DSLaCL7MqD7V/OF4h5cc76QX4r0HZwy0H5vH7QWwTiTcg4lUps+Cubx+Ntm8K1/I
ts68MNI3vq+N3d8EWJ/xBjeq3vq8eL2oPS9KiEb0t8K5rWaxIN1Yw4Wft3zM8w5r
W1rVcRtuW/Eubetr619FFfFa8o55iZaN0yuOO+VZsxb9fDEeZrPkLY3RyNej/FLj
1aOzVwaD8/46FzPLdHhrUrATWDHGrAX0mhY++6reW/yYYkg2FK4Pzj8QBk4qUC0w
mnA12rifhT0CPnvZhCU5wlQkW846PmJJTGTXxE4gJNTeT6EMF/2SHQCIralPC2MH
Duj+GvOjIcfoo2WzpS2yuUKfivxiqI+bnq1JfC6tZt6BgJSkY7WchmgcJ/ECq5kY
nbx5tuX3zKfOUd1eqyhCle1FUUxHh8jKnP6FxBLOnW/RtcuJPCLhrnXLaGExfY5K
/vkdAK7s0po7DT8r2qomjvvpzTs3ZpWWfEvb/HsDK8kSxBgDq2KpFi/btaxRgNVm
YuIOwAqVZoaD7MZWY4gohv6GpY/ASRK5y6JWIBwazP9LRQiwAOxzjniwbri8HVI7
IToKrJ0pWqiJXQxzGBk5EyHbo/K3XFd2HyBG3dft87Wu85IFcxjjU0oQMSQBKnS5
NGEPp+A7qQpTdWEvXqGPSHwBum35SlvG6vpm8ypE65QxB0xE0+oa8h/xS7CQvmEZ
T5hiGiMZtDJuvWgU11EOiuRZz13aSVgX5HJNTcIcKDtr1ixkv/4ChYS1XiCABv6O
sq9dYVezxtNyEChrXdVIOYWDkV66/lxyayjHzTPFLUlf5+AA31Z8ydqXT/1DQ4Bn
pCIm8H6017racehrLedhW26Jm5xavkkRf9eThkZEVj1/9TTFghmKJQsFnLoGrXl3
s/UpDqu8ggV8r9JPpPT0QI6lNNxwloYjz6qeALwU1EuLQS9tsmvQXFH97xxTOep8
WQXVFdVyKLppIUTUlZYKwulSVX7zY1XkeaFH/aOQLBP7vgS+1gpF6LWFHT1DnD2K
cqhf1hZ7LVpcqvUQaopNe/Enn7Cuyk55tbLXSEhedn+8WI4FwmHP3BDPIWrJTOWh
0VspmKMJIPu/k3Jk64t2ntnnFp88D5TKS5zYYofOlvW7CtsRohnMKv8WK+LG+JPw
Kdo3TEHoJZi+Tu9Y9wib1d8GZ0elzzaBILQUbwBhsxo0pvIApc9WKWez9ROYOkYh
mOJPm1BqzNxg2EAICQjzoE7BXMEat3i8OX/JF7wzqoik45gC3sbnagDicVTHnKxE
9Y0sN7mKuYuYUNaEqgPPjyNH9Wfq0m3iuwTdCdFjtTIl+qMSNYzM4M69LJTNGDNP
f7EQctSJ8vIqcAG6HHlKWglQHR6x9e97roMTe7aDMcTs+nLnc6Yfi8XxkA39LhDW
B2z9SUwOQn4oXLordwMzd7YSsHmONltwjnQdPcLuhng6hJ70nrX6n+jCU7WbOkCN
6DMaZDlQuzO4Kp2DcKac5ATFjVWUDJDLtcZ5fcwQ9Oddj1CT2BX0grqahJh0R5H4
wCfS+HXSFI1Wj+4gc3X9hvJyTth5QmbOcWBs4ntcbVarm1lO71bYQJyiZN2gf2Od
5NgkrkP0fhx1nHm54GD+OzypZ7o7OmEKkahxhXHKwd7tBpQcCVPs5b7mSRmkphS8
XFCmCzrTyBOwauaoxEnU14+w8bhLmJ1Px411Dn1xqxKtUWpfxIXHTeE827/Pezx/
sZAelW4VRJ/EaAl9Dl2t98h8rD/pFBI8DxpIsrn3isytEDwS1vp8cq0wS47/8YM/
VwukVJDwqCgX9R64W4yX9Ms37/ORgRHmJLTsbRVVOphySJpnrpPtlFuyfSlOmJZj
v1psE7ZClPzdfQLcQMvnOLI9nh2D+SPNWr/ljueBEQ9UXiIeiuMkL2Kmu75y5+DO
cjleHhGIPZVLLFxdzimd0YV553l1J/oHwpQ1qpdgbzLsbewt+m2FRjE9ojPD88et
fHb7hz3uBbEU3UVRk4DrH2X7dfUJj/ScHUcW4BojeHpUKZ/wbZHHdmFc8Nsg8nfz
cy9yuXLQt80axFsVvaS8RJ3jrIIy+6LZG8grqM8cNq627AdmAc7FBbx+MKksDjxG
PfqXwC0hC6t5vJMZPY/8T1VzjNe41ZXplsbOFfnz1EeO14RuIbgQXnceaNYiReZ3
CeU/lFvDVj/PRAWnwGvKP8a8pHlT7ed4FIqok/OQFE4WOCjeF1kkEZ+rnTu4+jZL
SusZUDns7qEdpo8fT7fkcJWWzZZN3uy/GM2Z1U/cFin05D/Hf+s+CEjG6Fhi0SOz
DCD1EqoHDaCFn6T/NKEjuAl1D5q9ps+vDNlyqEptrn8xD3ZENDNUW5kyn3b04ZrA
/QuPP943hCWg5ezmGPodnuak1X7rnbp1On1e7/SX1Bd4dKq48SXazzkFzFrJ5LRx
dPGlfPj3tgnOxDTuQZc5DkJuCm469ynMIXL2Q67n4K7ZHm2P9c06XlrO6Sd2j3gz
Ld+wZ1tKuQq5CnfdMj6I6uS9lD5DPWXAuQlGZC7bhK2zBb4wXlfgKMOOgHx5MMY7
6cEa3pSxy2/+KkXEhZ4Pj+2G18NO0/v9lt4s+j0GehFFkJXaErUxdL12jJIF6MM8
/3ejsnEjnqRyQDw5xehzO/lW0t38pcbMSPP55iRqo85PguPPbFhbQbf8M0IPrjw6
g94ESO4I1j03DKtlmU1zuRY8x4ZxFmQPH4oMU/bZlkhpjdjkPc916ZiQU/oikZm/
HW4rXaYxad3OQBZ1HT9ChOAPoN1x3ubLNUIQ36O0DHlJ6jBonRO7sEGtFEBo7ygP
31iSNGujz8wbFYvSc/cb3hNXZ+zbBmkXZdBa52xe0t/z3XAbKSI37z+EsJxHbbWR
mMflquqqGl6CziybcUJQ7/AMx3aJhU0Jq+6b/iSt98hxUg8cqjrtOlyOUYzjFVuJ
bmZtSPSCOkIvDvDsCCwnEvEt6GuZLVIlta7CVQ3a9TC/eY76GqLELI3PiABTBV0c
JL6s1Mi/HNf41Jixp/1DJqjGOgcCkP0SPp8aiFecM7sveB+OCWDVpsqk2uMCaXSe
NOQmw83jGBb1VK0S/rkppcCjFqVe2+nG2+72IbzGFsdrg+ge6mSM3T5blHqiFemq
umN0yJTnuANypV0kugpau+nLc6SXxjysJkJ8tF/yie8sVpC097e2zgVxqbL3t5+N
alEcPUXQx6mqZQWPLTCIbXwO1tRScnU6VsCGpaVoMnigNdmUC1CTVh0b2xikSUMu
4phusfYZVgDiWwjrxwlSxlWO452BXqlZNLU+35HDvnWlSMYqXQfm9Tw1s7lWOThu
MN6TPmHoZ/WrYCaHxPfC5+pez19VGc2MFJSUfi/+oq3tpGwqXu2iLqdLook4iAD+
6NrAMf+hrO940M6Ik/GItagnNd3ozQur2kb4R3WBkuV3LJMlgzHjSw25RLgH/CJj
s4yN00CV6m2U2eCgpRDCq9GKBK5nbeJUlOLb4SRVEAeFrdUk4++hC8pYgoCzLeYF
UsmmFpMFK3w4C3t2zc/4aa34uTFACcY31JZxZNWcvwlbtphd8Uk425tCYUvLpCAn
/0hRVhfoMt0PziPOaxT07BrmSTFFOrH6yjE8YMKPrqRT0CB8FQgkzCJfn2ucsNBa
XpXLwYURnpBYYDE6OA6d0H3C9j1kHKcEU4lXlMVkBHTmk3PRZGS7zcBte0m2k/oE
LksZdMlBQ4FCgpusaFgyknDTyHf3TcCYirhipOf5iA79SCK4Orc5sIDLp7UdH87W
8gvzuaNvBYRogrjt5zbmN3zUya2oxNNkkYpUq2iHivOszCFdAqqHSt+9C+Mk6x+a
3k2jmEGX4N1asQX2sn2bzDL3t82QwZSQji4jZRifwIT+DjefqSpjP1oeB46mxbWh
BLxinRifCLvIJB+IW7uQR2Q0NEvcwuD2XTLMdINopnYv3PDrOIAZ4cGWpZwRSIpT
cO8HLNLl6DffBCYGIBc9WApHVBGDCLPkHzyfMijPJ4TzDjqvZT+tKXTCQkp5XY6k
phfieM49U4YIAGRGJVkSrlIjiyYK1DVp8oJ14XtROEdnJqdzSVUizpNlM3CdiVnY
IeW5LBaRU9TALyD89Xycw6mqgaEchzpHFTn5qCs3c+LXm7ubhKHAGZRia4TiLTi0
7MBXcDslV+hPaCkkWERGH+ePSocTp5mUdu5XUW7yBhfRghZsGqGqYR1kRhZqI61z
5Lc7v5VjD+bpme2kSlOmEMt0u9TmJOjJa1cfhUO+TzNSgt+UoY/vPYhmoKyBRTNR
Ol62V9ClocVIVWd8QWYyY/CCY07mppPFeoBmnYZxNHL4OBY/c1BsndOWmebKZ3bo
07duiTsEDj7ZKjcDrcPKMI4FXQ3vgHAZTlZXDAl2lOkLeGb39vhWBqZNwfIte2DX
2aCopK53PGHagiyPNj9vHXGx1UZVd9HWA7cLVeGTu6hxKtOH/CZKNOoeMpw6KUf2
scdwp4FD0/RH9AMga6EVuu5ToON20c6UGJXRjO4n9HcEgaoeUrP6Y4FYZzvi2ybz
LxkgtizXllE5hoM5KVTd6XoHAJ+wqDuyI6TJ/HOzAnDrwXxXDK7OwxzvfvPtl9y2
iTUhSm288sACkc4rhx9eo+/duiisZRnFyclJPjL1Q4loZ2snrU0SohEisx7hnQsd
kx/ITGdYv+R4PRe6mfEteb3vuDz/JMJAHA7E5uHASBCRoehwSQq2Zas7oDVw4wjG
Tu1myvdVlwFLErxpcY8xTZ+7z6C+vXrKK+ppJfyhEs+Bx8p79Oqh+OaS/HIfrQpT
0AjSOHl4/90QEnVV5Dnux9bY5fTlNNorQ+uBHd+j86PMozMLjpQzILDm7RXbsq3P
c8HW9+AyKB+doGh3F5tmtFwFwuS7DAQ9W3APKksdv3bA5i9ufy8uKCwMPHeiRtgW
Jfocc6BVTMFjv+uYUnurKnd3Zc1z0buYktrQuCvzfPUz3DBJx26MSf7SgOjsjuum
2w1Ps3If1EL8Ita7a/4T66gkqkVa5cIa086enVarfdXuzjDMS/7TMqxCRN20O/+W
3ilpTAqRs5vz3fVtb6X3jjvLYvGsRqWmW1mRLC8t9U5L8mr3zV7G9IuitVfmgSXX
GG3Bl3Q5PUrZLGMlVIo7YcjmBiVzGGm0n34zmkucFNvKGtPzDeF2xw1mJ21220tL
75XFoe0sv/SmJoImpIYHfou1FF07UwKzLTsrtmDQmPzYnQA+yBypFyGYBfo+dENy
LAUPIM2EqqbndWHFdJOiNjk8HDqtZHhNW6CntIwxuziEqZ/ww29o+UiLTWNN+0T7
MHFpZZAlgvKirMnueYv8kKxptM45LVgPJZqTLG+EpBQT6wBb2tdzEpVnp4D6UB0d
d+aCQ7XasMFCy4IxASPbb+vWfr5BCResCNpFhXkGTCgwW7py4fCwh6L0MKvUsbg8
L6+yc3swNpXOGZFYtWBWn6KoyMzMzLy8KjTg/EqyjG2vKhXD0mBasWrF4DKCOEhk
MefIZqPLoYk/+cFkNjso6YPLLvVuTZnl4afVwrvyb7VVd82JH905Xy7UEJZQm7Yb
uvdKFkeHCq+wNDQ2F5OWZxKR4bdoLL4muHTJrVMWZ9RUE8lrjMPEOX9ivfxUu2ij
ASiI59S7V1UfrpiqmUIeahizadu3jyukt5bAy6BU+mpspOQ6lpA8smvE4n7K9jV1
Y0Y86QRZ8JMUm6olg12ye/L0e91si2S9qhhrY7yhKoiIlaVRt5H+C/KxujIuOV7v
c8UnnQqCsxSLL6na0loMo6nSPZUibWSWEZt6sz3pLBz3dEdd3z87UnSdFBTb6Lfo
wX2CyikmuSFptcDRvtbcGOqWOCsZdh+Um2muMH6ISCpuvINA77URY9GLO24JW5S5
5nFdQY3iuV8SbJpYFbmsQ6xaFec4igFUkvOqqP84PGHj+dTQ9xxwclbtn+efKJcx
sWdgf8dxP1MN5iqjCr+HcOuVeP39ztnU+isvm4dRxdacXSVKuEOi3khBpWFLtCOJ
xOB7pqnE2W+2Rdipq3lfLJVFm2oWB0vwIJBvrFaOqJT3CQhTsAsmXZ6rUaIS8+rJ
RTdD4Yb0IMl62oRt1U9s2oeJ7Rq7iIe1oq2+EVAPQdP5lJ0lbNOOaaTUccmMVoFF
hPYog/nLjBwUlLvMhtBJ7ohLGtrO7l1SCI+CR8UaC/rkbiGZS2vm9mBJh0jw2vFx
iLEHxCJOsm+BRmWgPYGa83Fj+ciuFSCnhTSBKYhKmlbVGOiX8zdtheEiU2dKmK98
b/+oPFGgxGyt9InmmIhBWTlK2MmQWX2MkYqlTFRLLq8LFrJ9Yr6w0i/n2w4IE7Eq
GXhLincHNwv+kcSj5yLWjod9LMdlPoqpucyPSoH95Fz06Vmm2oIj36D0ls2oLzAT
3WPvg9ra9OmaLDZ3OOxtbIdsN0WOKIc9z5Qb3MIlf8rCYZrChRYud9d9UfxRv1+w
rx83an3AaskKRyhIvg/nsi32ZR8at8dVIouuOfWSs4VfejMQMk4XpAeFpiC2pTdw
Kj5KusWj24J3uqZUe7IDd03GHlJFhGl9BNME/YJspS+t4x0ZubSXaynO3Tlu+BNu
vUqwbm2jSd0GwKCRKQlTBdvQA6WIUXk+JWKkFuGIs+ULYgMmeJGwtbRM3/stmg0i
UlnZGoSXaP+PHniZCdRt38zGmbbWPdM38Z4rglwnJ4mNqJXNlvQAMFDYBIJGTjjp
Pw7TJ72WE8ZXP5iil8nddu9B0Qq6p2Qh6z1Jl6x8Ysj+GB6qnfF5BbRqbevcJRFH
olmnvNxK2xsl7cexS9WhL5hX+o3iafg19iZUG85dxzNHkfVjOkYYbsjQlvuEAtfj
OMigGhPjrpGdaIKiceFQ8aBV4o7ajiGr8Qv1YrVi22W4N6furQprK87BZ4jQQ9hO
fMrSS4dU7mX+7DKEVnL95GmzsLnjZMGPp9m0JgMpi9Hnt4c7MjPZ+tf6neQjfefj
zXL+152fRd8/7+k99ejciE4lhKRnmv8UAy3TotCcVMEzhfih8uFiGdCLTN7H6UzH
l6RVp9OsdyhFTT8fWVpb9vGR0pbKlujM6TBWAV9Mn9jdm/38tqsJwMemr69QdPUE
lbunjcukNq+33NMIx1k4PGGqZXls329KljJvvcM1Is5kzUDPYH9B0ab+1YjhUzNp
qQw1UdyyotUB0wDZqlGfFYTOydzR3C77QTSuUyiDOPuWQ6Q3KUYn7me2bN3w7U/e
AVp9jWVwpyF0p4/6W0hMNbrvs7WCFD4g09N6jNts+ovU3PbHKAOIRbQwTuJJl8At
x5nmojHWOZJYnfvo2HeP1MIGt/pbklhVvN2UN+NCvL9Fbf9scrqs+NKWE37IdEmo
n8nVhds4ZptxsdLZFCYFblwUxwWv3lvMC9OKfr9kR6TDO1LZPWnewPWk3bd5p28k
qC9GaRKpGdtGZVe1abQrdceG8sWMmPZ+5tKeFsaipCPPQ9CLXzdnRhO3eLQMXgkd
49K0EVZhXJ+SeXd3NwgW7O7jgNsFy6h5VWlybaaL+0xED4LBslYzr7d3f+XnY4fV
g4a2274es5AVXAfKDtkEiYGOGwN099kezYTeT+4uxl+CUGWslObIWfFDsdOzWgIS
ksor3yvHotPUMbmTwpjRLRuZjbMLgapIkkmgumbPhkPHZQQsTjlhKVBThbreQiUq
OcTKY0Plqo99SW9QJWkjm8M6+gS4oart9QS+EbCie/C7a6b4obcj3Lpd/2RF+9H6
BqBjnpe5roj+zIhz0vhjqgZeJ+4irg2HkqpXmarn4izXnaSML4dc5BFMSX2Bulb9
Fjg9oj8XTTluNdk7Y7v08aX/Rar1wxfr2v5KmctNteaWAvnmPpGlXLi15OzZybt1
qo4ETfwV7XoXFZsrOucq2iP2LqV83EIrTVpogzyY2HDKC3Gjoe1NRnQtG8qCBaV9
ZdkyjY7FrhLFWeWGHunJkoB8Qr4W1jqdxeqBE9IPYCvDO/rHrTlRMo5eaXPppmMV
FLAVJ8gVIcimZye2s1It5VmAkbNJTm6tjc8ktZa8KpL7keAaSH5rJufZIImcVT80
ybNs7XFpLtdt3NKuQzvJSzFKDgdhw2YRa42U5tp0J3VvAnnSNJLcaA11k4jCNBgs
tIi2h3fr9ba3a3SNZ5q7FdCt3HZbnL0U4m9p9F13F875pANaMA4ftzbrZCoq97JI
hTkMfWmMRRaPcm8QcBo9+y7npbxUKOipdzfsF60aL+BQi/ozHrHbBG8EU6W0FfLA
KNoFTH9YMJXsquuz+rOFccdShy1FSpLbc9XHuZLEEY58uoa0X+zn2VJelmebY79u
yZaMNAasM4pSSKTmlQcx5acMTg4GD87ZuUCJUQjjUW440QyY2Zw4ndh/XB6lHeXf
ldu1zY9MdTJuVzuJT9NeZRHMdx63NKN97Ka5DQHYkfUZdx/shiGjj7JeyzR31qyJ
gUSFLXcBjiAYqSxdAqJ01TJh840U6hiS2ecMAr5TF3Vhemy6uOlKrzeko86m1VXQ
LTs8XQ2Ti5K9x9XI5pg/RVGhs/jqxcbFeLaTDXX28n0hjiZnNV/vBS05JtGmaTH8
9UvmdqcKcTUrcQ17GiwZhxiChgbvDDV8YbcPjdlZCLtM84e9mumPhSHlkVO+CW+Q
0h6wxr+fFvrjJMZbhp0FwPIv4Vto1rcMhaWuvowCgbKhnb2ptRUBgIEOwEzHRKBJ
IeBoamFAAGAXAjBwaFISyDnq2jm4EcgKiQhaWzkYujhQ/qupt4iqfzQlxMnIwAhg
YGbkALAwMLAwqzMwkL/+/Qv552MisnbWBo76hnZvB1L+OCgi+PrODq+vIKTrYEjw
R5uvQilrgz8//+8jJy52hkbQDARMLNAM/yICVhYWJhYCI4JfMmY2Ro7Xtv8osfqH
jIGJDfBXGQDAxvJX2Su9HR/6dxkT639ojx3A9lcZGxsD619l7BzMLH/v9291Aazs
7Ox/kTGxvarzrzgAx+vTv8sYmBneQgf/Vcb2dxmAkfnvMlaOv8kYAX/DsbGy//Vd
XsfL/DddsXP8vQ92DnbA38bByvHX9wMA2Jn+JmNkfDtk9BcZM8dfdfWqP9a/6ZSN
6S3o719krAx/lTGxsf9tfpnYGdn/OjYmdhbmv+qKmQ3A8le9vMr+pvvXNcnyp3E4
2OmaWhja/bEhFEzdXtc5CwG9vLW1AwHjP3aFuJWRNcGv81b04kIEGgTchqysADY2
Q1Y9fQZGfQN2gB4zIwuDka6BHpsBCyszh9EH6P8Z8usgm73D65b+YyMxszGxskOT
kgrLiEBDAfEAAQEpWdnomtoZGhA4EDgY2jsQWBu9bn0AgZSI+FvWwNpRz8LwteR1
AJave9jG2t7UwdTJkEDf0MLCHggaiOYd0L/RyyuBAv+6/3vJ/z/pTQ3/1BHoK3MC
Ib5ekYBegMCA3gE9/EK81APR/KMc6l81fxHSP/ivxAUE+Xp9axj+lbn/qA8N9Av7
1uJ/Re//UQ5J4PGaw/u/UOP/beIBwnptGRiI9teA/iC6f9zfyr8Bif1R/ov/jPon
4s/055r/iT4Agf9R/u5V7wdA/xz7L8mvHkCAfs0A2Cu/YSFe+U3HbzPyplmYV4Z9
ZTigXzpHeOVfcwkE9KYj5FdGeWXUV0Z7ZfRXxnhlzFd+Gyn2K+O8Mu4r8wIRAP3q
8a3nP5YH+FvdX+//VvYm4/ujfUVdPUcLXTsCO0N7RwsH+z/V/RdB/sK/1X1r7434
frX6n8FvoN8Gvz3/NvhNgb8NftP0b4PfpuS3wW9z99+C3x7fmOB1yt4m+W1i3+6/
wG9qF7Z3MLX84zuFQNbC2uG/6OhtcfyHjqAJCID+Dn5bRX8GwxD8N+C35fbb4LfX
/23w2wL+bfDbSv9t8NuW+G3wm5J/G/xPI/Vb4H9arN8Cv23b3wa/7dHfBr8Zgt8G
v1mM3wa/mZbfBr/ZoN8Gvxmr3wa/WbXfBr+Zv98Gv9nJ3wa/GdT/ABYBEns1MOCQ
oECf3hbx/6H/Q/+H/j9Bb9v734zAP+jNCPwv9t4Cqq5eXRfGpXgpbovi7lrc3aG4
u7tLkeKuxYsUirt78eJuBYoVd4rLz6Jf9+4++zv39D/3/HfcMf4+a2TNzMz3TZ4k
c2UmeedK/jvQeey26IAAuxj/8crf4dDn/9bjzzIB5gXYEQMegfir6wSU+285YByT
TzElP8ULRN7Ts/CpoQV5aoWfHPBqPogXyD/rB9jHu3+MBPgAlwM461k6GQHIfww1
Kf4S+e+DdEzddttgn/cx/of7BxAUYMJA/JMCkOCvFBwB9sA+3c8I/vfRgzJr36Xc
9BcF0L+hAHws/UpBAeBg56T3OOL+GcX/LuiPQcsRUXX+ogD2NxSA7lcKQmbGxkb2
RtYGRgB9I0cXIyNrgJWRnrXDzxj/u2j/QQH8byj8HFn9pCBl42JkDzCwsTY2M3wi
YmlmZeb4M6L/BqaVu7q8d0T/ogDxNxSAyf9KQdnW9v8LCsJ8PyhA/g0F4C/xVwoi
/9O3o3kjLlHD/dVf9wLU31AADo3+9kcp8j/0oxxb/k5HYfTtLwrQ/6BQ8I85DuCV
n9I/Kfw8/9miAPF7Gj+7fUD8nsavz47f0/jDCojf0/jDCojf0/jDCojf0/jDCojf
0/jDCojf0/jDCojf0/jDCojf0/jDCojf0/jDCojf0/g/zQoBABwTAWeRgcMGYOpA
BxzJEIP8mMUnf3Tsf50DrwHDgABOUwsZONLQ0QCcHWgBr5V8wGFBwZ+BQoP+yAPw
++cQHugHpgqM92cOV/g43gC5Q4GsP+Vh5Q0siBDI35qsBYVYnkzWelY21iYAJXtb
xr+xWQsKsQOU/peWa0iwfy2X/z8DWAw/ywhY8z8s14ePoVAgv2O5fpR8GmD+R7x6
kgbin1brn3aV/ww/TSn/tFr/rsb/NLj/+jW9f5rvAvqB7o9FGeT/hTDw/LeFfzZV
vyX8f5FFGVihwOMP4T8W5R+A+WNR/gUwfyzKvwDmj0X5D/7gD/7PA/jz/pdG4C8A
G4H/Dv5YlP/XDhjHD4vy349H/yOemt+/8HsaP5tuIH5P49f6/z2NP6yA+D2NP6yA
+D2NP6yA+D2NP6yA+D2NP6yA+D2NP6yA+D2NP6yA+D2NP6yA+D2NP6yA+D2N/9Os
/mkV+mmxAbr/KatQfGgNSIdG7d9ahTj4Vt4AuUOB6ILgPgbG/3INCKDN4lfbzv8q
R/+TAAVO3YLqPvqePeX5R3mCg8I8HWlBMZ+OYI+5BB6hQcGfZqvhwUBBgP9JAwGB
e6oQoKYgEgBk8CnGnyXy4wgs0Z8lDQoCeAr7OwAz/KOuwJFgfglnfKqv/wywSAHN
ICAkckIiNAy0TM9IujZONnbzT9+PdvU8+/nH71+W/Wf58VfV/2qZ/30NtSicBhTv
Q50O0SH/dR4nEFC/YgcAqD11sS5BpZsY6fl8R7jBiCve3v21pw4ecVN3oroBL6av
la6SOXpRkSp0mPLkzZGVK8HOqLO06cVCOXdAUNJK0xErl8f9bMBC72hArwbA0Qnv
YIMu65Xvpdrag5Yrnrbyu9GdABEy7hs88tsjTLILiQ1aEFOXV8nFme+GL5zSEP0S
mlEnNGR8kMw9B1IIPK/2vS6/YaZMZ9RmFTRJt72Cz+IIWPNydeaK9V8rOqoz/z6T
Wl7KZqXa4vQ1HfzB9msEOBId3nUS+App3xkSW4Jn3uE117DrrS3qPX6kD0wbh750
v+1Qgv8LLfHQQuru1n3BulQxFJXe1FFmaVXhxIft2ztXxQJPl3viVS72MvHiXgI8
qmx/K5Q9lL3XMXdDejOId6ACLwBokvFrgWMH0GNDeMWmMPv0SswInoV2febBKpm5
0pgQNVg8/qzKYbTVZdE+Dw+T34pNUkSXwnaLdJhgPiqK0LFsOh+GD98RHxYzHt4q
eakUFdznLWPsoqLXAnqoT4fNE9zyhTO3rF+7mdTYd+a65H1VOOpfzzc6LNZsWU3H
9uAde1VkV3wHYaUOk2puc+0Vwlq08apH2ApbI5M/VaTg45Da4aTWCY9V0llfVl3f
vIbh0PmQ7NFgWaOUx+5br9M02jiMxPcFJirwzXFep0UmL5NuxrknakUW2ZzqulrV
OjiyeL6Ply31hy/an9IJZZJkSo20um9++nILN/atwQs18uON8Vlf6ZgX6qYmR2ne
6bcTw9B76crkHDgOywGOuROK2U9+3fArkvqBg+u6MgIO+x/SKMzmpKObX5nlsL/U
sqldiQi9v4Ucdm7K4j7jErdxPm6uWzhcsN4qxBgJEz3ktLxIBd0FbID5cW1/9+cy
iKX4quXqq0hvAWePH2CJYA6XMIVeqksUP/dxmobJ4mRsCmrnlaQI/HptRB9YYowb
JbR9fE87IyMcCl/tBgAHDNt+RQh0XRB1DvmIeiNvOyRiEs9O6evp1iLtcxsI2pzU
6CHWksxPRo6oVXMuIY3tfGUfVyZyUGealkQc344o2Cx0Gr+BVFTy1VOufs+xI5gn
4zuwRWre5HAK4fTk85CDwzCGgLpO+6gp1AenCOiiOK1+BQNr+Fl8i4sRt1ecij1K
hiEIT1qSXZ4+ayTh0vgLMklsnCn9WuCZdbMyQn/DOpuGvx9q8HoLFvRrQoeUeX/U
3Tf5HSHhZrb6RiWLOUqkyuIiL3mXXoLgI7pyi6K5l9iK4qFUQTq+puga4qOnubym
1l99bxkPYieT24nQ1XuYEKuH7YSXwEFttXNddrNSLuiVYHNQx3IvLVGiSh28gcby
LFfg+PDj5GcQ7SVDR5yGMv1RMrnDjiafSImSOajOd1EtIAMH0RuCXHI4auJWa95O
Aonz26+E8JG3IbdgEL7r6Vwgl2BzMF00TWBvOVctOn8nZO6sh2o0t/50vKyu8eEs
QSkv1XU1QaBKfN9cZUOA5JOZZsjYs/eze0bz97lSGoYVh7LvBPVOyCHnKfFeGowB
VLz1v4MZRejNOup9L1KNi1TOCr6bGKFrqQxTdyy8S1PkXp8s7oW01u1S4uaJuQuH
GFHyUd/B+/BJsxVljpII7oQYjsXmKqqQgPNKlJzDQu27snaXy5TLTcjOQsVOGDcU
qdGn/MuaPlkxjrc7aMgqkOi+41uJBwjUV55aRovBG7tC5mSGJNvMlbI6+fJVnTNm
C+FhrEXWY5zJl2ZOEPO1X+N3c6noD3p1jSZfJjb1xXPU9znYcN/2+pruVVDZEXB/
svBZXrcKYeqR7XH6LgwWOm5HcCTL5g0V6fiNip9ojVdy2nMnpEdHaac1k7xG56MS
yrISbAXkDmKekhqsDqhFJTd/Admgl+cXal1Z5fefUWQ+phkXlY5Z0gTw1c2kuz+f
k1AuMVTejNmb+qxHy2JG19jL8j2XqQ6bNnhkaEJK3oVkQ6maiFoko2x8mCLqS0Le
F5qTBnOWE46Fd+gH7KPZHHhv9abttgzvNgyIx9HsXuRl9axSMZNcqznNT8XtGzfJ
5b/0GCcm1Jt87bs64BdMz1M9ISXDk1E/9mYSVtyQQeKEyYYR4RloDuuIuYue2zvh
7ecfu8O+aqZplYyRn2Bx4w843iHGsXeu1I/iJ+axut+dYJ1SVV9vdPgf8icmKFMZ
qjGu4owEwXR1IUiz79fkRDFlxihvL4ELoUmH9KnGa9Nx9/XqH34UwRkniTXx8s/9
nKxqx2TuvBBis5dzslnmwSejp+Bk7RETvEdF//zODOsynqmLc+r1DmzT/e0pndjY
BY5m9hE0QY5yGunLUbdGBDvS/Tea2XpJSDNs68Us28Mr6+4pRvkmRAg6AFgF2c81
A9g8uKQHXsHYGbxGhfhTLcK2hY1GBs+JKsFQEXi7W/LThBHIIBtf3jmodE4VftRz
Ms5MP+j5siw64HpptrPTHZcfTBMIWDXAcr2cbMupYWfxH2QWMQYRMIHJYPFjsta2
kXMx7Tx2NkRczLOoG0JMYIPfwPioIu2luLF5kNyJUWPda63Os+8Lp7v7lQrQcBHn
dxdfYe7L0hw80+h9VI8ni2G3laC1G4pknbNDVOmyn4Nwt06KahMyd2b+XcIPvjQV
NHqf2Bp/+/k0rB7ZxR1lle4sZN/tp17zJFCsuvAu6D7+qei2tquNSVVhrY9UV285
m6JmPpolh06PckYo82qp2UupWpcmiaHDoz/XLkaWq3afMfDPVN+znjnzmMWDE577
kK3MVPBiSI0ay/nVRr5EFKeAHlaGcdUdfWQJnOX5SN4X05djntMd1CwZGWsskHUj
D42EQvE1SMI5kYHYERythNhVqZrG4eb23QgTpYJCjEQ4aSrv5GH3EOnZlLBcWBJk
g0k6nfneNqgChIRxWG0Lxgw+cLLi5zIBuOMaRGQFtEe3QCudUIyxuW1LXZ2o5TPM
ztYhjwMsI/DNYAZZ3RkdWV2K1RgXtvpHk5jd31jro+NwT6hIZWtbnkmlkmBx4nDb
cjuTnYggxRLWvkzlptY3TdWDSyImHpFxj5GJCqxYGkvoFpmP7B2Ja43RqzqVo6hl
Jhw2sGATHEPL6N38rPYg/E6efQXDHQt52ANrApFsFk1ZkyaNpluVPQ1++cjoNF2b
6qDfScYmcNaYttu7/8BWyngCQhpNYBxk27+WWRU/EYYSAZEVZ5zNptv1tNNYJfeT
mmVJND5hfo9NSO2wHNemhAnAeBcnxjVy0wFpYlSRc7/4g3zPlJGfMNxq5ivN175e
qpmqGRq3yJ5hL06+cH45+eLnx1Unk8iV/yCJBZ5bMkE1svgofdMYqXqjIlrsU0Tk
qEv2rUQdryKveLiitDi8XuNzMJuuU5d6CefLg488nawJO42wMJ/v9FbKQMtvX1d/
vITKnjBQ9z2AiLVQmpeKW4bS7BN8r8Mrb2R2Glyv5bZhsYpH4x/u2hBCagGCHy+4
IRmcm4oGFhP8dTV15bNDxxBXkJkKqXTiUb6xhh/p+FZ63Nk1il19DGrmQfXmrReu
reUQ8/XhRetCdrORN0NIfmtPsNsu+uU3hvaLO2fcu/zLb+LtbLycsm2MSOCtVzNu
nm36oLcnCGEFzQcx777eu64gNG4u5aj5kYLXrcZxm1BWLdd8hZ+L2DQWormkHcTy
XtBvhpVdXsGPwgLT/iZxoRNDtBxa9Y5Dq2j6QOsIb8MCg0xzbgpuGFD/hqrJqwPL
+yqb3G2eeESnrU91PEKTVpzcNIlYtwL/zjN/HEbVcnLXzjxPHgm0Rks2ySX7I4Tt
pmVlZBvbK0QpZ0R4kwV8DjuoY8wRr4gkJOrWvgQwWNDp1a6PfOg643S15Mw6fSER
3bB8fDM0WDlgc11MMaPBgGDGWaWrBfGAGy/0RaHLBvNSJhKaxOYrjb2C3sCVsjtd
1KhGb6GrNZuNdqUSbxtoMoJg6IwbV8xQk0JVRBBGSj92IwKboxwq53WCJbcJPGmT
AN5wDmFeiW7/SF5XscNQA2fWIpXDNCnDNYZE7DQ+zyOG4YskY0ndTWolXSKdGDdI
z3ErYlQkNxTMu88WtaUU7n7GQztCvZNNrIMc5neOjp/vUld3HDoSeIrDnzl+iBht
6LWq57F8VSTjdMR3x6/KHKFRbFzYLyuAST2z1dFy5BOhwU6Duxbw5Tp5bowzn1Ur
X3XFZVvKOUbRMIk1PzzDpkXGu+QT1lml315fcG9CQ9ySRQX9Nhdm0KcI2+CtQjdO
D1dUpJ4YvRjoiedwG13yVM+htU3Nvy/a8WupvYN81VNML2Lc8lYJlk/wZV51xyo9
qFmVrRhIb5yxEC7p6CFybghZ9y4VwkQ8KklmQIWZgT5k1511/xQ8vZL4vo5agAKM
GHdy8zNbkjLjs5iZ5i04mpXx+dm8pZdcg8oeoiJ0G0t9+KDfsgwnTsdIhrhRqBq/
wSdNjNuo3sFWOKIkNd5Q2KzLU3l47sZi61BOYWaS1E1eG9zHGcxJV0dkoK1Tu4+g
rwvsyHVtRfhphppStJWtfzu/klBf2hioT/LUqnQXv4ZJOGWAE2C6ujNjzbskT1/l
KiduG9lOOrlpfs6+sUxpEYx4euUl0qaeuGzCxFwg+uITlchGTbZw8ODAyc0eXr1g
/kzBVeTVLU+qr5Ik3ZB+YObmRhrjyJSUt490AY2OJ0WCJnmt0WWsrkaLdNx+MYCU
pUC/e8QaKTKyIxY8B+QlCtlG+6AoiiN7oZ6obm5NIAVs6WAMvIhoTJmKsxdGVXP2
+srAhMG3Kal4HSavyJDqjfbP0L0xCB4S+wsIbis3Tuj+7IRlqh92sKpnTdEg1hAO
RYjVK0PPvbXkSxKzBE3iQfRqAzXf9lEcbk9XytzLZFG8Y6RE5rg797Fk/rj17wub
AceaTwuQsTKx/WNrxF+GpD825ZPTM3n6tgfukvfXqkoKRg42TvYGRg4A4E6AwMXH
gGuaWTs6AH6uO2ZkaKYnYOMK0ADu8sdE/+S0nv1z/TGg3i9LmRkoGjkCNB69QiKP
6Rq5OgK0gJFa2tgr2uoZGAGAYoIOTADgxo3A5BwYAGw/vYwA4MaDCo+RA+iEXR1F
FR2BK54BNUQfNYDLlQHlRB2YAcDluH74GQDAJcF++BkBDD9yAYwAuEvfj8wrPYb/
tXCUktKjPDAjT/7HOH/szfco/88MPaXzryX3TzJ0BnoAelp2ZjaGXzV+Hf7/Jxos
v8r/rK//VP5X4V8L+O+E/4UJsCz/w0QEw1OhAuhkHuucjh84G2H9pCpk5GxmYKQg
KvBfT1KkJ7ooKc6hB420sLWMPn8JIDnDdocFjL8SQ4OQDxF/IwcWGEDqLAQp8gKF
QsVQqR1UNOilgfALOH8//RnYE2S5ng55IeGNxXAL2MMSltOllLteteW5zbqZOZND
r5lGELlbP4hPjqqgb5izVF8c7HZoPkcd6LoAw0QGRVQFbV8xNoYQvRQCm7xt4U5O
/ijWU3V+QPvGsGmBuk2O1GH6wSfmJZsgMRTIM+EpVi5vUowNsHjFqm4sxgeIz2cJ
FIyBDIzoWbDZxS/Xusosz/O/UTX1v0siXc/CVhvGambOCG+SW0ohWckJh8jSfEfy
1STHE9qoRUk8BWTjgnxi4jJNCoT+RbLO4CZplmUIo/ALrIOQEzAQmPgujmZ7xLAr
DtMMENc8k/VQiBBx/TyUmXdmG1t9xtfHVYpX+gxU8Z3SK8GuUiNn1fCR9BhvymwS
hUFJ1KySTWP2S3D399Wmv5letc0t43sr3nH3ud8oH5PujWTwh2eoLVvuFdO1oIOc
E6un4lW1JiiDVFtB8W2sFMseAkBOIEGql9JO8QMttWO7VuHJ4ML29iwdQDMtaKm2
2G4y/Ww+twVyXCQPHNyovMrD4PUlEkdjMhLeyMvPkxQaHIRHTBoxvLtAflhr5zAb
6u+kTstsxzh+u6UsvxUPGxBi2vSWy1c1mtbwWYDP1IoPJisZNJZ3usULUycdEK+3
HHL14tB9NtwggkTgxNa87mBeuxrIDM/6WptNS2LKHKIY3e83rwngNEOtV6T4Xyp+
O4ePMrQnyabGylkOsOwAex4N7fj+GbMvLT0YtS4C7hsmW/AlAEjAGzFk8ERwWjEw
Mz6ISn6eWZBn/AyzoM7+5rYgk77uoxAyfqy2UJoQr9sRbOHg34jyPQvskKQHXfI1
g/E7QkbL5i+MRs9FShaYRsZRh3ET5JdjfwHeLRgSjRzLdzVK+hGT0r8wS1CO+4zI
EbsRRsv/+j30KIAZ6g7UKwDlHdiEHsIsSO2bufJXuDCinwa+CrmipUFjtC+sSNSj
8yDWfcJYwTkCoX6r8ykOhq8PBnxMRBUG51hIIFqVGBSF0CLmZS5YgXBKNGIuTkOE
WIzdOjhUUJbeO0z0Hqy1ILXwFX0VvWl9CfqpdwbvVKQwvrEaIzP5Xvl90J+qyFMl
K+Z1hmVFSY2g6VLRjdLVKE+qAJ/V23uFi9jbjrWKa+tdj6nJaM1SClGHNBPe9Ga3
E2GF9Ni1mXLpxaEfUofDkb4nYeszH1wf/OUogp42smhYdQgLPyTCRACxJbESMjbM
JsxdAMonZnnfj7KOLwOR3bo09SkqImf5m8VxSWXiXogHEmMoEFMkV/sqiZu/1CLl
Jm0hjOvnNBS1x1Tj05YtJc4E6JAgxfLKxZOTvpCVwBUWmJPhkGjgc+NzE/yggPDR
elK18F1jurpsi5CXhBedaBxT0mnSWn9JXFGMRcJukgeJbPxMkkuSDm0mmQ6hj8R9
3m09mHwHX4eib065SpbISvUn7rfiwinZCfrB+in6Ifr+qyzd8iTNsb6xdc9lC/i2
y8dJPhBiC0x8cBuvr5au5pw3mqfHE2XLvZmI2+4+I9hqOYM1IjHS2CDfwN3A3qj6
rAD1iV73kkkB60N4XHhTeNQp87eGkbWRBdYyM+2HZoqEK0prSs+ElwnGCaAJUYVS
yjZTL6bSC60KZSfpzUnN9cznzG+maIsiRvJHXDJG0nWYH9Zvg3bKG0Pc66/Nv3fu
cO/EYadgt2JjYStjJzH3sGClWKf0p2ykbDL3Vpuqw9VAqG+ob9Zo0yckHwwqGZNU
hXFklZTu59OM8eQuFnGXGHysUjXJkakaRtWKpdVg46/TrFN0EZCVpFOl0ymTP8zi
kc8sycxtE23T8PncPgqY1w3jT+34mBWa1aaXoZezYkBUGFM0RpmjnvOqh92g1i70
mGdNg7Q8JF08VjyiX1pxdnJJSbdxpHoE3uKbKSlzEUtTb3b5FzW1YpHp9xydXH2e
OW6pV1Rw3GGqYenoi+g61PvUijS71ARqFGqQqlbVO+XXnfNdKRZaBl69geZrBlXD
eYvfakoKaJad2/a9XqVolS+iN8k0jZwjnr+8Ib1hgOYOcg1qQbyYdXQmbwrwmkLZ
3VqpHz4OX4Mm8yCrmBDPX05XG6YYRhjOgYPHOMKYpMG0H7Nbqce1j6E1pA3XcbXN
mlReSFhT370elJ6J2HTusupanOWeu6u/oUKSRIoRDeuNz4/bxB6B0w5OKnsd87qs
LvZC/9D8MJ+HkyeEJ4IHtdW5tciL7lLvDuzO+XrxdOZo83rmRhaCHaIYdutZLoQI
hAo0Dxwj7HNIJ4jODtCOJj8CunEdYs1JdDCBW0Hnt1ywLPBaaNcOmLTUzMWke271
yq7eri4QNPrCQoJdTWJRfeN9omER6JLoLiL9ot3CU6LSwh7CScKSSarUalXrIuHq
4YA8bnQCHDQPYmf7govxRcmgtb3VZ2sHtEyaiVV78/Y1GwUDI6XROh1qdpT4OAR4
y8gPIaifCjakSs90Glw2IGbimoJuYjd7qDYjjrUujW5jIJICKgPGhJK6tEIMxEvF
0cTXwGT5a746Veqc+K4XxEfH51AwFYwVDJkFVF9WTwiQ6IWWU2kxcZO10HUy59AL
Nn42mzpQRs3mG4uRIndQM256F3kv9V0snDiVxF8Nrsq8cslE1Cjzs/wgyrez9ZR1
6wG8/tP+G28WYxYXJ5NW5/vA2w6WAwvEkrfTpZoLDTIuWh2NK99bd6OsAFZic0cD
IgMRRjjL1qFLk/Lv5ctbdU2rDr/1CDQIyK+00AxrIFp2W6JZ7i8aV5WYLyS91B77
rj+wGroqS/IldndZzev11eLgecB+y4fzDzcuX51hXL4sbjeeqibrq2nPjZZ+1SrZ
GDzJPqlrer3XqqKnYaeLZBZlGFXN+LGyRaLMXHQqfyd3xxc7KuVby45H3X76fO/C
TNuylc8EaAR4NzQP/gvcZp++CzmLEn6rbr0vK8WdI7vZO41tJj46PkL7YscxI6Jv
RT/0fopymno1OcP2kS2e9VNEbE/Fml2vzd3X74IeqEXbckw5DZcQ7IQcx6u9lwSH
GfBcc26hXoXbZHeZ57Wj6qHqWdNfpkNqc1nNPKQ8lrffTKTjDePR8KY+eJ6Fnyen
VH02kRyJGUZLS+XIdPE+Eeh5exwWghHE+dqRp7F6fTy9tLx0acA3qUz7uMG+YKHl
5lY5qciklEPrlVe6V8t+4F3ENH5TRqLOnrfZds2hVcu2bdVd4lpJZCuk1+a11g3d
0nmj10bkQzoOeBjU9QFtq8eD9hfuba+luzHoAiRt3kF39jvTO4O9tWyyZ7KUGYW8
JXdTlzPGBS1ne+9ndEeqgk2iAusF6R4SrspkOyFHCkaoRKpFdkRLREfCr8IX3SvO
uo8GwpMm1t62UdzXXiSMFWV6u9y0mOj3dx1ZjO0m80osfWzluJ4+t9o03FqfcDE7
zMsPXSpq5T33vcu6MTjrjdnek72UTciM4HXxhL09cSW1Mv62fBFwevPvY5SnbujT
wISVgfFn4M/t2x8HDOKCgsC92A0BT31YBYDWPxR/Cv3Sp2X8qw8vAwBu1v0f+7Si
9npu/3Wn9sNraNW4GWyeB7FPErOKIrN9jO/3sJJBDZH4lfSfi2ESQvm9qSfvfjZN
g4iLRhOqUK2OQk47ufreWm63Xk4S8gN6UX25+wjs+9HzhguekaEH3PsLTxPPXe5l
HxA+rb4EsUo7EL5Idh3s5wMyGclpn3IXwZ/xYXwEE33/eWNDfHZsDMX2GfJmKOQW
9/FFJZyumH0n6D6L3V7bObknPz7SMCekBgpvVBI4yDcEkJIosphv4O9NQTe+wZ2Q
wAQJFCegEeCA2FGCPKPMscjCfBcA0wVWENwLH2Mf9o7wSxou7cTcWDIWzZA0htGD
/5Tp2MPpQH8iYdPYCARrQnNxve2lc8B50nGDL0yToOe7XoRQnO4oOKGQGOQb8Dep
4if5vQK4UMdcaipgOPoewbsTHzpgkW8EPDXI4YRdsUECZCroeWD1DYI7u05f5gDO
A1T7BuDEfGehVrGz3vifQBiIaL7YcFglDLwOzh//osq8jA4ynkoHA48dE7et1rDS
B8VE/kBbBkDs32DFgAOPTpfDmEvoRwgLnH22iuG3h8xMcCDIEL0umsOtl/mcfDhS
yP2OsPT5ev/dWy+J1630+BuDWCCFaq3M+CVva+XXJoQ7cIP9CWlfSAjG4F5LchP2
J57C9wRcy1CGCbcKEph1gNmBhRKudiuUMpND6GNSqVOJddXzgdh3cF0mQXe9h6bn
x0f2BeP4DKIZDY6Dqq6LpAGTRhIo/cxk3ZeafORN/cUa+04OmmkEROS6nyM7E04p
ThwjKEEpgVrQed9bhO+jrV4nXm4517hZrSBrZb7wkXAdILgYAszgjgMkb0dbcWeR
3ihg4Q68cW1GN+kjMkGmqXPqgmKOrD6LMu9/S3Vpr0W0G51EVAvJl9r9HjOScGE9
I66ROCztWSoGFv91NHUDK0WaPATuur1Ng6XULtlIjM0dQc1wUG3khbdnc4++J3YP
FcFBGgL3i6geMiT1U8T5dJbGa0XmDewZzD5L4thCZYY0jhr7sJjDQYVtTZTDzzsd
D9E1snPYEwf0hDbya26EJs8ebJrfNJLPULymQCJnA0Vt9clyVLgGNEo2QGe+ItgP
we+FfuHRhYtyS+XHE8mgG6DG1QCx8RKHh5zOp+5UcVjk/GoAEZNwJox9IPHQDzMR
HOdzMV/GDPLHTLjTGOgcGn8u4S+2b8KxMptQaNZk+DzEi/B1nUu4nEDpd6dSRgZq
+nIWxVk/LMmZ0YljlDFEi32bTISHI84UkceHGCDSEfFT8JgmnAaxQCrK+J72/esE
/DTNtE2xzDQt+0mAqiwuSSTqkBDcGOi78hmBNNKUjY8Zpm9H6ghmpA0v+zhS+my7
2JbIc2KirnLSsEfu7PA/r7Gg0zD7UCsm55A5cV3IefYyQRnt+VSZeoqQqQTE7PXJ
4nWmrXS9Z7DEooVnBTd496k3eQUphqMzHKVj9G1OFryFCMBgvNc1PM3OEJrzMFjP
wGlFEU0yMMdAiu8elhAp9ySlG+/7RRkPI5lrCGWK6W3Bp60jw0hT7AJYA87eVUqT
voC4BBCWkHYw06AXPWjpzgzFJIOwDnIkIsowjM9TSUZWeNMgxt85vuQoZxQGJe0n
1RJ7kA8vTGDzlCvBLlhCzCXA/U4CLu6i1NvjAeJCEIJRaPpgeXcZR/jeXaGkgF/J
4mrJ/vCj76ScOb2uQnp0GudbbKgK6JQEOvIAFyQQMHsSYQX5QPrM/sA6XNA4om8c
80zpajJHu4EHUqaIICMG6y6EUvn+ZHHo4X1iZ9kgJK6Z42DXR0XmiG3TiKNUbF8h
25L5jxCRIVf5Gd+B3yF/kpLQM5RsZ5RDpOzALkexhHzVgS8Hjd2uZwtf7TfxFdoW
VhMy/SvtbcaZH5kucjNEJ2bgGD1nXsi2Aek7EuMgDoODd3ToAcK6FaqMiYFGuvpS
gQm6mXoJs5yWVLVwRZ2t3SkVE7OQe9jO0Lsd1xW85XXsvkVf1etRrN/KdizaseJH
9q5VHcN78miHJ60UHQ25ImhHsa3mH0u6ki1F8HYEwfCRo3IGUKzw1aOCCr2IEchF
VdBnkOdXQmERAi8G3e9CyE7FBCxFKynEGcYi0odlGYL1E23GhfUnrKvYE8yJZZDY
RHOvA64yBPIxFfbIM14gGpGS+Fe+UZApyJ5UiFQY7ni2KOkm/kHBSdf7i+5SbEHy
5NvJhMn9Sf9JxUmLyaBJQuyIPNmqnKvRbFNNdZ6StNq3KrKvxJtkdj+0qMip0Mvb
qsCoiMkjU8VTKlHsvWbPstVaiflUnp2S/SE7Xz/+pU6FmF3NKn43ejdVaEtop8SO
xLQEj8SxRLLEQDwrFQt5umJj/pmmmtqc1Jwgh4habrOSW9UJ4cbpZ+7PNkrMSpbK
YEoKyoaURUrnhWkKDTknaTL5GmN32xRnnteU7nh38HegdyyCcSt9X+kvw0nCzUWI
1jjXCgqzCz9QajhFmleYJ+ygTFEVgpuHmquYg5pr1nSbT5kPmddNBk6yTKVP5kw6
TL4uPHzd9n4pn3+ifBxm/KtFvNneNHvOsVzcKPMM/Oi6mXdeg+hpmnEZuvKAelhO
QoFywfeIaaPHbhrCvtl8yPzb+an53pomJxg8KrxImdph8/ROTi1OG6cIx7lGsEW0
RoTGGSedbenx0xnULeUtvMndSY+ikUmk8ZFxnSIfqYdWUDNdC2SD8nbdoA4Of19x
9bhm0mNSZSlOrm0ywS+j0/TTtlkr1p2InYREBjnIRCFj6DlMIuA9nD33Pck9OOGy
mBeppimXKcFSrO/SmN0GJ40rk+cGhwarBvkVBSfkFJO3aScG8jqNp41hjT8YQw8d
pFIlN6Xmp9rQ2zARVNNXvNOT17drXyWTFJZ0kczaIB1wHnitMq0irjJQEqn2XW1X
zaE4rARJdbkqa+FybrCuoKKBI5lzzst+en0/rmx+tZa2VmDBfIHKuT69KL3PummR
xSO0JahltrXnPtE/FHwhq33ljWBUTqRBgEHBGkNvviJ1Xq6U2qsPXp89EuGocLwX
DzjN2N9yJHDWsN+tWO4OOpQ6t3Ik8LC47sQWSCtmSlelkr6rNZi3wpBOwqId0JrX
vHd0ckhoZK0/b1Kr/9Bg5dC0UbqBv986ftcM3W3Q2Ps8SiWKLaM04yojiNvnwv7o
88n84dSm1T7N0dLa3WjvYNBu1UD+QtJ26rebBJu6zAKCmbKeQxMfB59Wn5IHonND
Z9KmjDtHTotGx+ux7TIwLnB0yLRnxGCCYFRgdNBmECQQVgjuyJboaSieAFf6LhJD
vb4COQlT1635UQ1cIsQoxV4seAc4jRfOrJokXLSeFpcjKLUo48GJWJfh5Vi7Jl/C
qsNfiOKHgcmnffwuf5FTkrMp6kMgGBESWRB5xTJNUUtcyy3DZG395b4+6Xhi7XXv
snS5eDRJNUkhaR7pNEmrxDMp9aRJbofPg8JMdCQ4xGGxqQqmFCEUNRSCVX7GVmlT
qTux6hnzLAvuzit7cA7w3wxHOHheO9G6HMQwS6grzN9Xu3wht0ZwMcU3Wap1828G
WSJdQm3l9QFv0/lKpErmGn8Q10r7OBAjM/ASaRuVVSXBRYYMrg3NMAo0Phj0TEBL
qGHbFXRWOO/AfZtWnWZcEcgu6ck6w15Hf5HSJaNAu51xyOGzdstvVl/NijSQmj4T
Xwb50LEXPdfHk/T9xSW6EkazdnT9V7Es96z68py+WlPhsZzVr6tlGLFwbnALElKS
iQln1Pp08zWYGlw2dgvPT0mMJN2TAqkX66TM1KYrCSTVPuxK6HgmnqlJJsvPjVcG
ZQZ5er9Pk6elaav5YnE1TNdHJ6Sjqc3g1J2Idkh1iYZBpZagnHCocqKifTu+PTCk
462a0LpzYj4z9WpabiZ4xrHku0aTTfp146oT0syI6nK9b0OWfmdYhAOb9scUlRqH
uHHSubyDIZTU1FpVS7WqjUWVlenhne0p6Dosa42K/Snn+/PdV7cuzHvM82oNp/uv
s8usD5/NTakaKCvWpDY26V6UeTy/qPbZv3fSemwtjPYzPbo9mi66D15pbKq8rlu2
fdgBvwSd872/nrwuWobwnpj8Olq++36447Pg1+i90TWbidZ9Tlzv+v3gm5jAQ+q2
BWelU1NhomnVSXZXKdfiJoqGbXUHVQeNsNcDY4d4bcsL5vPqXpo3lzuoEmSfZTzZ
1Tztt+LXJ9u3wyeQFr7VLnIznQ4OVTGY0GXC8brcB30lGK6uWpDNuOBYdu84FTgV
vgjrpW3QNt+z3Wa/zhmIEqVr0rZuXnX+sF3YO5VosTQjo3nR5H0t8jWCwNreWnsn
fK95OmHU6UZlp+Rg4XbBy6XykOum4Gv+SpPkCknrauv8XSF0IJL5PcuVDnSTVlPU
BcS54y3uxeliUHOQrHf/zYaWzVzZmU4RfjJX4a7DgcU+0kHbtev02hJZLFkn+EZb
wUPtfsHQxKH3xUOLge033UOm7Sokn2LP0gfPwzAzuvnA7CD85kE3jtvC1Zr7XS+b
L8vVbdLuN6auHa/mm4Z8ZO6rNrwubzwI7Hk8L9lotI5w/30c9zT0AnqYmFj/YWz6
aXb4l3HcDxPPP8ZxjL9uevNzHPfD/vK/Y5t4q6wRjKOMeR/H0f+saXhifoomV7DF
kaJJshZt8UN1ikZctQV25dwUOn9VXJzh4B7xsNQ4nBel32pYUas4f3MLDYzfuHvH
NPSNQoGcisvuS3Keald+8jPhuuNXcYakauapRiOep3fLVzabmVjZvjUCLaU3aNkk
nawO/R9PvowZfG7nvNomxM6Vx6b+qMIdOzT83FuAqvSuTYM3Wpb+NdmB5eFrmwYc
antJkpNF6FaV6kmSr6hCvlXmi9UhUIEdsgR1u2BhuIHSxDC32e0brIERgRgLlyyi
cSPd7zngqIsSBFBcIV09K4LoLr46I8q1y8bifJlUEj57aTEtkTKMJ+jRENQg6sZW
n8smV3W64OvUVziM1+MEX9OmQN0FmQGhLQ8XwvFV9E0ZS81bKejl0oUx3CMDofv0
iB1PCFc220JD/DToQII2NbPcxst0xYTbqq91vg89qoO423taiiWY7uKvOpZLj6q3
bILFFJhfpT/Kbr9RG4Dlto+WEMaXBYkCb9MuwUPnaM8/S55KQ23uM9lXIiE9eXG7
kfQsqLI9p73NnpviLJjkTqOuKh1XtW+U6SWtfgV7XZr7StDbPQkeSHy7ZOvUq2Ht
Ws1xxLxX17KUxhJH+oc1jQeD5PZwl0MiMpORqr79fsliYJ0mgIEItzFZ39Tqr1TI
+dg0+sr976UVyEXFQ1fVyVATn5vl+q+U29PjumgNBVSNZFO6RqREDn1KcYrfT9cq
ETAqh9JyqabsFiCQB8+gPIOeDd1VzMI8wP76+WEtP30gIjITG0dPrxbj4WaWemEk
bw6eYo/inPlV+6quySzPjAu6RyNaiKc1QGJhZCC4D28RzLwtGNuKUvcOMhRbrTSo
tZQ6irWHawDrFFK65aRnmbtlvLxqh5L0mtN9XZsb6Ra9Hl+1uxF/1taL3DcTDOdS
Q9SmWd08o2XCyE4BW6Z6On/BHV1LGSJhZ3iYxJFfcKg5/1uINkGSjM/VewyrhHSP
+53RDxMkBm6TBsIYl0XJGlicTAcVKwSdPoGvOw/f8sI/0LbQeFF6kaQn8STRxr3U
iqaV0JFcliCQ1Km/bhqK9jgnZsRwIDlBn5gqKa+beafKQWmTRJC4doJ4Je82rUxx
EsxFkr+uVW7pMjKUavOhzv5sgzzb6cZhU3VVbUxTlh18+e4dyFDYLBv4aZ9qztqR
Wfay/hI8J6zVYdxMQfDb2ReSNskHZgynWssdQvT44dHPv+ClwcpAIsF+8Ur0b9JN
7UjZGkI4XaG8ptxg5SVsJXtRNCWbot6gT+XxaYUsAYbHS1McZ2e9XmHUqZtBLbSf
xprVzS62y0Vxj6gx2aE1qNXqNdewd6Dpg47rhdehXS+2EBX6WN8aPlugywb44fN0
DwGrd0O1vCdXrUSVEh4X7BetWeRLOrx16mzH+DiuYaanQyq7mRcaJUNIX338t/zu
Cd5neir/TbP2017OQM/G8TPw55TVr83aUzP2S7P279ZioJ3d4T+znAON4U7WjsB5
K0kzQweABuBHE/i0D9FPLv8ep6Ceo56ljcnPyP8yhf/cq4yOgZb5Vyvwzyb6n/pA
aziATtFJ3/HpVMneyejHBWCmflxUfy0tpSZKxW9vpmcprfRDRcjIwcDezNbRxv4Z
cBcrYJrC1o9NsJn1IxVpPQMFGys963+GiJjZOzgKmurZA5gYH9t4vb9OGB4Ll+61
maGj6VN+2difAQn+88PExPTk/nn2KPPoY2Fh/a/cM+ARqMXCDuT3Q4cewMrK9uTY
HlMGuseQp1cA6P+KGfhhf0zn6fpjyKPsE6cnvUfJHzocwN2y/u3zj9Tp/+kHxvoj
ZUZGxqeYHo9PKfzK90fegHo/5YH+H2k9xfbo/uU++Pf3Cv61Un6cy+hZGf1N9Vnq
mTg81QNQRuDpRqRhZWUB0DAxsgAYgftuMdDTs2o9oxN/vLXMDPitTSyNHtOj43cw
AL4gwkHPAnwO/zihYWRgBN6EtmJGZiamjgA2BtbHu8nRyEoFwMECfJrrAW8A4F56
dKp/ibA8Pv+fRMQAj1VDx+9s8nQHAJiZGYC3juuPsyceTwwfn/NGjADGHy9z/FIG
v74r8bPX8Ne7Kj9OGQCM7IyM7P91TyG+BVY3vvuOjYdp5HTPi8sjc27RMG6owpfv
eSQfMZIon/BBJ0RIwE0iUTCGxBGI0Ivq7zztOEiGsKCdeuIJ5tzk1eoaNejmY4Vo
HxKz0SpvvI2d/Wd1Htou7g6Nv13xMJ1yjXAxLXu0VqlV3O7MdQmohwhVJ4fl05Gs
ou697bQxLtVEGcjQuAvYIh1W43SxO/9SE4y8sdsQVpoax4204uk51zw3YWI00s+B
ezMsyH+eprKmym5zHGpRtelbwN5aZ9o/qOkVjEGnznU3/+W0P9MWv8n8enWu2S+6
6FlMdyKtmRqhTP8qtO2XeserPU2Peb7gK4xsGZy8EIPTDeysN9fRNuI0bvFbsESU
BYA42JjNfjehDo6y17N5Hq2LrsYpLec6gdH8mtddOmED7EcpzY6nSK8avxV26XYU
yFdvotXL8JJzp8Ar9yO98q7XRiNpXr3NH9FmlKecSzgSjcKPlui3IyZNqCU5zfb4
oE9RZqWrtBu92pSWIXHzFV8B3qUY2Q3+6nkunhh0jCGjdOh7FeFW7AI0M+hx/twc
MU6B6NN5zPHnuTRivTGOChkvrMOEpzq6FUBmoI5anftFW/k/A8SJQ5vBzODHmXOl
xTSiHbPx6NT8qrG3AeMUxHhjxDoL3MpbTWX7iHazNbryH9jTM7jT54llXLSW3nFH
YidxIzYRL1jy1aod7ljajRDOGdi5nW9RF1p2D7kkFyek+7fEYtBtC/cmvczfQ65Q
lMg2LFonpCAmzSrKFopLa3qGmqCBKMGY9TyOPFk4O1kmpFYNL8FfmrqzlVDmuZFO
VdwctrN90pB8g9HRhz3USvBtQGwXT8cF3R6dIcur4V5cN7xx9Fx/MdHoVv7xirVL
/M6Lkb2RrmEeUjQxJ7GJ6FoAntA1lPgIj0hpJa9dOApH0G405g2qfYJXwMw1TEO6
F8yW4LleXlzLwnRZnn0ZSCwaB0A9HtwzC/frmYpz+XLNXdMLzIR2KfCcc0lIQ+SC
2Gfzoe6ir4h9NPZvTaFvdktVGRudbOnO8cUJGc7WubmuuJ8LYodNhle/EIfe8uI7
jFPJHRLTiFEQa2dcp1QIb3l7hjh+k4sRG8iM3t8eWbvCgLcnpqEv5liedBfYwu+J
edy5N7N6ieihhbts3Pa8l80u/P09zbm7BrEEVKq8rG1EaE6oAeQO2vmA1tthU+Ny
f7wuGJGY14Apwgj+lMBqWPFexEq/WjV5MuvKzGZI7MhK1pO37DyCGfTIVvxKkvCQ
YD2uiZi2KABDDX2N51KSXy4AMm6J9bv4fFySXxpRkEeez5SBdlV1ZSe8cU18VwPy
GKCYB7qqpj8oxNfHOWtAh4EuehOhJmbgv7+HHT7OgvnBgl5iBjlZq7NtfZnxcK3T
ysgIsyKo2tBMrdqJwIqbT6N3YprMdNdy3h3VSktQw8JsN6GaRVyjs5pFQINlvjHz
vFeuWqHkjiyfJSWztlVYo25iGn0+5X2JcHVNdG2PKW+J/0adFlhhZ5Y2rjPCN6He
ExctZpgvvcMnDNlX7VeeRwH+fVEAo67kQJEKP8s1vgACOOeEKaMRD8SPmoyX+ufY
tJ4IE0fYHIHEBn7a4NgtganNgQtzMTOE0oI7j7cFhX+u4C5Ycy9pzMJTGUoLqkec
IcTKOG7iOL6NIelzw3AJjlQGlAlid47MWlyif00dOanhYikmnQr7IK1nHjXKECMV
8J1Imw6zakLP1lFuN+OweNnHhKSnQ8QZY0HohB4l1aFX2uphOMx5FHr++U2OP/eZ
9/MYX6fqQGJTlMg78TD2Q8FPUNra0p/2IHGpFj7F2SW30MjjL4pa3RZyj/kEyQq1
wbjQv8kMuhB9QN6NNtM4uyB305M9aznaH2Oj4oQn54jees++FxaS59F5l7Ow/Fx6
5v1qVu2W9G05mbuBq5CjnqrS4LCK5pwf0xA+Xua75y2YFzjoGShT6rYj3GONRwlj
85ZFPLcp3GPaWwKMcIlZVR/0jkddhb7YKrQhcspSzSzn24xGjV1Mvd4Z+H51/ZFH
lmC8CUHG37wcixoqrkN3FMsQnAnZv4nIQVPSvmBzGnYlH1xA8SWcKmRQVtoQgCwc
G7MhPldzXIzV/hMyJ+MUR1x4GopkejLy4fs8O0UFCU8YaQ7R2BjUoNxrMlHnLaY1
xbtYIsXritfMe7lnpSLxebPXiBKkrI6j8HSNNPH2iFazkuROX5xNggkkrZuqKmIu
W6h2b52G+SNTVjrvJaepn6UGkfjcXvpAxN0bau+0xqBiK4xssuRRckT3W+AmX88F
zE4GtpxpuBd6z2pfI3mbWs5SIWQvT0dtboy/14uIIHq1ZTgW2bXFO4qI6Q8+jwV4
5/bqOZNQ5T7+51qqT99NX/chmZowx74cK+0zfbFv+Hlh35KimKC2Chlr/lI/V7ja
7Lib1vJUBWX+BaEgjg2Vm2S128DC54VcqJCFgE7T5/yBpMxin7LF30EJo46dpmeL
C5f272+mfqHNIDbyIJo/gq+rwD+0NuCOZMWAX39AHMaPlRrXAscxkSnJxCuziZwZ
ETGXWaywz+Cd4iRCX+CoinndpaCQ7dYz6HbL7uVcyMDjoWpu7Klquclnt+ijJLsx
Bb7W6Rxb8B0Vx1lmyhjJAucjQnGULMF0vUXX7I43r9v0/mamMvd5G5cFdZsai880
zKMaVxFBGX5H5lQUbxHBY4hVgCs6CjtPrV6+L7wZbujVWq/WoCVYK2vQCU6Q69QH
f4gTxMGL5Rfz0FZGOAxkOIqJl9HxaCFrTlEd3FCnlKMvyiqzZjOKTpaZ6Xmro6wH
lAvInbuCotdDizRKSe+vrzorfWgu35t2T3lSVrrFJt3NIKVM5ldvd9ZbczMqs+oZ
Flp/iQ9Md+eWSA1iybbkc0me01yO2R5EPxdaAVmSix1mWzeqaR40HWS5zawHXAfo
hw9rk2PfuMjTCLyOThShQMPiiPFFk0rz03vH+UGPwJGCllgd+9iPhllco/GwZ1mw
nVhD4GieZtGse4qDnA2dyl50rJpEPJZmUXDcq4mYgDompEI9BsJC8TwGREHOLRFi
HcL3Lu4KZ3zz9l1G5lXazCnRzfPwUqIkmDmR2okrw1ccYtof8m2nECuTqlFLwRCI
oqKV1zcN8brmX8R/kelZK3p/u8kcbRZkdMIO8W1tnX5eW8b65U1w0jWTTvTUOuu2
lqYTTkUsGOO7cBLJvvSzysEpQ0oO0mWB65iBPmVDCqshZsODz1/i3EK5pM8l2oYd
UZhgY5Mv8Yc9S24ZTsnGwV9/kcQn7t3i7lkU6lRUHzuRr0zjImbpZ2ZiOwV3j5Yt
5ScwZAzFzUunDmkaIfXJ8W6UwA5t4koWN0LMUn7HHOO2TlgZdZ5FpNrKyMJE6fDO
9Tjcwm4GWhxnzt8G2u2tpxjN54JBxWRFYr7P/SSumc4nOPMUH5qmc3fprZ+JFMRP
vjeGvYJ088f9YHctWStUQZ4QmqeZ6RZVL27DCNvihf7aW6TNgG2lSd1dCz8DS8AS
M6npyjROJ6ZtFFDy3mDLUOVzYnlv7kbXG7LzHhf05KhjbxCXB6ZRU6SqcqLxuBO4
EzUt7WvXnkAs8eig/pz1pMlQtogxdHcmr8z7BASjidnOPdTtzROHk8OziePp17Hd
6zInYFeRnGY+nJHa/Jtjyo54Lak8YkgTOWcOrO+kDeHm2Ma5zJLPQrkglmHtwzzD
KlUaBC/cGgm9yO8WzlySPw+qMyJelkO1tCVxBbItSEZGIx1xi/BkPWNRxGllSJEl
G8M5aglZEs98v7DlUI0nyyHBm6XDR3wXlmEUXS3VKyDnXf/shclAlt59GvenyK8e
8V7d9zRXuWAUFN9jzD+ImMG618jMhx9ab9PZy/G8NKEfTvjs9RndKPXE76TQXsJk
bBke62G4gazpc+N9Gun29+2bcavt80GdYGgHmG1Q1GL0lszIQ7DBC6/2erx1LfOO
WUgzLDwhus4+qRy4LUZ3GpETlWtkL/WzOxJ3kJwz6GuEa0sjvbHNjGIknE89Xz1I
UocS+bGagmqqLuaQYrUZJZ37iRLEiXJJzWqrBRplGmUlxA/FCCQzxUxyHS6NDeNw
E+DWA9LiRfsm1os2etfb+n0U8yhtqDJ3pBq7G2saERd530/Bj0dNRU2wbbNtX2wt
MzGDv9IhauofaG8/JXDXVCeakmzq1yqWQGwPuEI4csNOJonQb1eqjSg1YRt3Vvmo
WYTTBzU+th6f1q7aNlxbzmT5njk0Mhe1D2z6lYdguoY3vlzJLTYHBUF70x2US6uK
SRZbhY0j+jgUXgEU53hZrra9gnuqJzlejvuV3UmMZTaPeyw3VQQkevNLJAVssdYz
GDdxdREb4iY1bsK8qsCI9rWxM7ejtyHVsd50Ru+hoqDQv8fdS1gTws0R9IuPHrvb
86aTjJC4xFA2ht5GcIEXkiuXjidsc51Js+ostWtWp9NfcTRrIdDkxq6S1o2TbhMu
su2B27NwvEzty/yAMXZDtEdiFu8pgSW76QtmTWzRXzmIbZ8+DniIHCZ5ni4Vur72
1booV4KDoHfqK6Vix8T5m8YLXyT4RJGsLqTBBnhXBljcVUJPApDMaF/+U/61JP+w
u8DqXdJKRMbXFfK2eK7mSzJRZIqMI9HQTA79yskeYkhH/k7JyvVrrCcUc0K1Ywvj
bNEf6El4Qax08uBNRONXkvEtwW/eSOte3Dl6M8wLT8q2dl2QDA4CjHjnAA++UgCn
5IjkZfAmyXY9AmKm9+UZ7RreEWSa1E6xhWemtUxMmuqhF9wiPUYZQ0IFIYMD1C8N
+kBPqrUJJ76LD9qF3iMeeoAnD/WYqIhVTZwyIKbSP8MW2TU/ylyoyYojRZzegdJS
emXLJ/3g7VVYROlxUbg1l8OlpqKukEZOGY6x3psd02xLjnl004xfN7Att89a1G3J
iH3GKZyISbLx/XhlqEIpm4OEbBVD54t/Zm9+ju41JORQAWZo4EO1NGVPWWpkYWb1
5Kj9sE/1ZCVNzSlNAXYRSQ33Z4Pvx6o7R+Wuxf4yWDMgl8N6xz2qO7lvRGFdq96U
vDk9teMvXuK1UaUWTjX4XrBCtWn10QZ/OiftgDk1sCdomPU7OdkraeM3xnwUOp7b
Mjs4QpDtnt/BnRn1y1fRFDsuy6+VAJGSdjgFH72viydn7RC+dwpcXUVwf1Z03Bq8
DH+xkqKgwEwo2G2g0JhF0eIqZcnjmPaigai2qtmhswcxYdBURt2420Q6cz46Nm8N
/zuF6PMRvMQTLZ9PD2sU1ojplotvawjNBFt8vMPZlsr1tKhrnDQ7IWcCT67wsHHs
kDQHQgPZbDAjRW26pCLWG11DF6dno7PrVmLkqMO6NIyW6Yq+o7PQBX8IPyY8dsNB
ZzYw98NRMLx1urLqeF/L5pAGsWuAQ8radarolOW6dqa3km5dqXfr1ASmTn00kYK/
8UpZ1FnXZX6Po12/BfldBP/INKwY8+Zo3/GmaOIJTw+dL+m70KHwLDIEu2ZFn4yh
A1nWwb0o2Pb8mNXCSerBvtt4O9NTKCcQul6q8XiF3B4DnHvhN6DHcTp31YbupUKv
c+/DjiQiyTblaYTzXToLDBmVVXrkhXhfOITyID7f9HKPL9vTPb5UQDtnYsPuUw3f
P+sBRcO8v/Xk6XBxNDWEklEoWcOu3GRgJJoUqX62NV2cPOPoPONKepwyfZBymsTW
69u//yWDJCOe0O5+pNRd6/spVO7HC5+CjPQSAg5CnueFdsXegg6IFqIyt/1qtRlI
5D0IThzkG9jzgLeYn9m7BGI/Dpn3LUq/p2VTVbBHuXcEKzBx2kJol5AXMOhUND/t
nmsei8/MzEl+WBDGS1a8pbS7PK78YpELReyAN+T8iuWIbJN3O8PIn9n+pSqiv3Gb
nv82mRNfjSUdXT/em2P6s1MDQUXD5+RVMD70HNenk5gSZpiMk1IQaCGrPXIHZ2QI
gg1h2Mcrs3M5nuyu3wIROtcqVnBS2KQO+6qHg3snLwNb9pTPdwI/fP/qrNa13bfX
RBSP3VqBQsQahQjiRs9oaJJWSlCnmLNLJmU2C4channXFcgqMjf6jTDCU312NASh
QQ8F9ZM8gUMwGqoufNLxnlslZRLUmmfmFwFSQjzBQuGU8BdCq0Y50XlE/CZdV2GG
FJGK8f3JtEaMDbJu/oP87lL3VHOBN7iT3LL47VdEjdiMqN+j/h/G7ilIFKZLF3Rp
l23btm3btm3btrnLtm3btm1Xne+fPt3TZ6ZPdMe6yPvMWJFr3TwvgYyIDl0yT00v
kqsUVDuyBU3VcD07rBhmxKU2O2yBXfyzeOse7qX9zCK9rzCfndAnZxPV0DuNf1Ab
ntvdEVGKP0gZPkigChHO+ZBHtHYCVb/EzaA+kTEfI7M3L7Kn+aGoYaCKYQCJEZGr
Qsz+0GjAETGtOSAu/5aGmP4fEz7fAqfIP4TmuR7xT3c5Jxe03EP67cjx7BTEInMn
EBSoKSR1NBPiiK4AAbSrSJgSdGvAKeyVhN4ykX7cb7KBvPes74E9/R/iaRPf+QK4
C9dzVKEMI+8jpzIOi68nQqnnqsMb1t85PjWalT235s49R4rar52v7oW8WbdOv5UB
o0FEQkJCtcFgJzLhTzEff39jqynRte4kvM0MzA70SN6L1ev2sIX3gQkNuMV7iHYV
gqFzmRxpSV1yF5EdU4eOZHlHKhcO1RsfaFeqaBekh12pxdifQVWu81U6x1CzAMWm
C3YNOxPFK5CTiM9FRguxviWepZVWM5IuMpKKalpqWtzoNoSRphS2a+16KXNw9eIk
z+u9/JgsJwJYVlH0kOUWjD23AD94mn2+DVbXC2OwbjZ/JTkzY7+P3htZpCCoFDLm
ixQPmB9w01vEkUddq9B0LIDDzNVUWCH6Xq9dOwFkm7Sqgd4kG7OkrRO3UZsZNqNm
tPHaj7/xvp2HIwo72APsUtA64iY6VuaMG/b+HlyuYqczXoh7YvPI/jrq3/pglXzd
WK+G6ZX2ymDNTfY3BdHoRzHkHmvqU2hR1is4Ixsxy6rLa0SCAnqc5/wcmT8LJ31g
lKO7NLjRNUSztn8ceYE2Km7Ue7HhXfqMrfRfpIgnnJg1Dw1ZlvZj68A0iu5EflQ/
HMKF19sMtB2gqvhUcH/C4vFCL5AmMfol4UiSnVDEyW6MszPNSfeHV7URqVbOriW8
a0dDgDUB4CEXBqm/kSPUDgduDUyK/wE9om8YbOPzEzQvvfHbOWe+KcoK5vIJnUfp
W9XsswY9wqekI6gYHnDSdf1J5dtp1EGDKjOQVsOKyvADNBmIOhJuGMzhElqpNrqc
vry220Au3Lkye66Z5E4DDQ0l7SjxLAEdCUO9QMs060D1QAXNFFqtt3Kmml7dXD3H
ndst7Tn/je+u9dr9SuBx/xnWitb07epIS0AstDQemVYQgwJEWrUmjxEgMTV2Oorh
GsonDaiVmUz0Nn+vXCwxsad9OsWLXFo7U8zxqaTs1iWLF0SjI5dtU7ZTMdELywxH
O3NJQu3pdDHZjCSA2vH56r682fncqlCZ5XFbrJDKWutULkHrZrdR43w04MzxtfkE
plsUW3z1c4JE/QysPa09fvSFRnJHdTIj5GpKL9LAWYY6XrZG8prD7yVXIpqnkGak
XBo40yKd90LyIxM0akOltQ94BuhZwjYUHDQUtDEUZJjQ9JdTe80Of4fQRJ62rFXt
EPubJmh050hPor8jZnVuQxxVMZmIf5TtBkmkxFVRmbq0/G5ZVhgaB2cheTKKw5nT
I6c3x8K1yfu2HfHqp1gv2GMwV3EmRbSTObJbjbqShHuLWmB3ZD9+Jl/tmybFNr6R
wLF9Yw++ZzVdVuFPaEsyoLA0iiVM2MWK2FJACgQistP/YoVq+vBe9/dKnxrVhd2K
codr6nGw6ID41hpnFq6/COJ4zJ9v7sCZ8Z5/2twNYIL3tM3UtWOtKDwr7d6rdX8l
W3nK9J/uUMtEH/59YZYl+vL4sjgw0NwNmODf9j3Ot+39gRnMMvgmSRWdFN4UnKTe
fJ651GnlgmPng/HF5ERpwmbuvTIkoIY/LkdQeYVqK3ri9wWOFZ1SpTdUhOHc1trP
58KGxRwQiGAUoqfWILIE87JcRQcbfkjwY/MDJgwdlM0YXjrwQiucdsi5MbPCh1LZ
0Gtkd13td2kKrjZl3ByFrBdvsjBDXZcDXk9qvrCYye+0vJR1ZcmxZ3+fItQyu8xo
2i7DHYA40YgHKPX/KYpgpbGzpn44IvswGPl8uVaCWVo9j/p07LhrC4B4S3o+/WDQ
m0+C82m87sey9Q2+cfH53XSb1f66qpSTjrHe5W1zNT2VCePNabwzi7O2x3nfm7yG
mcVzt/x+2un758eYNaajJ5HAckIyg31jiR3+oS/AVklCzZ5baBu3bF0jIlUqJ0NM
JSo2KF7CbNX8AgwPQVeHy0JeJHujfjiJgJyZg1W7o3NYWVouJ1tO6ktNqq2s5bJa
EhqXzPWn1owwfNa8rLaqduw+dBydiGfe6RTX2cs97t7wzPGqdgn6fJlbVE1CTHqr
SFq3rt8w5hl26v/I2yje//MyWEZHorpRum14P/bjc0WBqP/YZPikKMBWPZNqUU/C
gProJB3bfKGFGMhGQi5RBhGKm+ebsUrM+nrnNvdjE+B2zruBF7sjO/1F1Ep5m/96
dELvoThFeKpRmiRIrI/LEOPOoTJl5sopUKFvkK/aUTW/PDvpkZrO7tP7qP+K/SCx
5JWQ5C5g6Oj1tBNS6cbtYLRsYlvaXmx0HfiOtX39rtfjfK0FdTrV4eH08fjql1HQ
+oanndbhsXx4M7rWzDbT9b6iZdS5m77JarVBxENUu7Wc8bNqpl8vcAegsg72Y1oM
UV3b2M84+xB/zDGZhXrMeM54OWsyDoFNhppTpCZtKiFHjf/SSrxOI9FgTDJlmPK8
4EtdgZXfYb0sLZw6H9xlksi1lp2GMlx0LFIps50ND4AmbY3oXxsSzOgy55upUosy
VPlc/e7zlHUdXZi0flFDKm3CQLr/1dYG2hfB4426ZqsFtk0u+lFp3CBBP7CY3b1U
kVceCFdRajW7xGn5hr+6VHWZkSzA6NqJM0izglyVwdfKYdV3uLM4pcKiKBCHKTEz
WXncaj5knB9z0mJ+gil1uYYZlVpWjxzscKUwiEWMVRD7XKASSym3RcBB3ll7qfpy
Nqvr182zHSbrpbnhdLNQuhgXVHZ7rQk+dNjAp+cByu3qmOpYhxrx2vggkG+QRXFw
H5yT7ZR53YANoWWTfPYdjyZIBO+fz0j7ypFi/w5GfMEJMrEXrHCB3LVK+5DQf/nA
erR96rnynHnsMylGEDR/3Jryh8SIrjjNA+8tHeRCXoc0bvHYc9LUbVPbNmsbEnFe
u4so04YKmT5L53FOu1S3ZfJJR5Z3z1Iz2m2WQUbnb40qW3kDJOE9FOG90oHaN3TO
NGKEn9OUh/+LwNZ0N3/Fj03L9m+Meh22L0H9lzitDLxx9mkEmo3jkjJzAE22utlZ
hjJ9lDA9b//jWQPp1EiIMbCmw7HXA8kd94HDZQEEMWn3gYf9/PT1JptuT/1Re+ca
mA5dXPvzjaylusPpuZ7bvKrLIE5YrnuZjXRO2vfh8NNE+TlTr8/hTcuhthVWSMaj
/+lxAiMn6ejzX1fMkE3NvwWJ4abFqlTChuIU4W3VJeAkIpSh+JX95Qh5E3965O64
8UrA7GWDuL52DJ7VtpnWnRV5lobMGkYHAHBKVrkHgQYNlbKRjKCKNT40Qv/MaNSj
hFYOtmKshO6ydZ26nBllA0U2MhdkIaNBx6EdR0Hy1JLHDhu9dw30e3GsTMzNwvu4
YeaJ0/MYueUV5L2uZhu7KURRkiJ2dELS4Ng5XJjUkFRkTcpkT4uYx5xUP8o80txX
v4zzkhd3SPDS+ZXVBqHcSJqmMMsfSNC2g8xOWlpqyKrND6mw0hazv9vbroo/zx20
W5YsOgEeHwFR6vJjW/Jle5R/ismWJc3cPKTpNdg/7Ekwre0BO2121nB4XuotkOF2
fz9e47k9Yzmtnh3L8TgMPs9OIllDecZcsJxd8k1by/q9dsKQ2QVW+qD43KRt6vK8
Oiw+xuDE8dQZgYHqc77loFG5qjYoN+I0KGL4TeFj9U+yo7wYKrNqVtEkDr3FRyMQ
ahoKdBYMv7kxgjrxxUi4sFMXVBZwg/aFg6DGqcqx0VTiuHz8MyhBr44oQwOk7bDA
9gfd/UwGixQQJcri3V46v2TRXu+k83I01PrUOj/y2aX5rfXc7zQx+bQcFl4/SX2M
EG39ZAFAQwMA+9RpeDEkDve7QkGIeDriQvBEy1ysL2bgzVOQIJSyGDbZA0Id/zKv
EfsX5WzqYMMAGqOQwYZLduI1MFolQ/i3AsUL6ZXPGe17poptzRPNrSYJ7VahOAZQ
APkmc2sAuxCbJXRRcxJGw+0gAHQRkQWbDAAqpHrxqvndrzlpAtqN4U0mRPHFn37J
+Hn32ib2N5btha3ngmeFK8n38upqXnQPeUkcME2idSMb0VGHbomrjVNBT05N0qhp
1b5uC7DOxTxoDmI+Vqc2r3D53LLrunFA8VPY7KvH4xnWQ/qeIQQN8dWISBqhIt4j
QXXUN5N915MlpAaJWl7pO7GwrBuuGs69GfhsqnA1us11vip/aCkipsjvqq4dnKse
GeFOD3JneeWxWcgGvQSwzME7QgY2lpQH9mKjaXJE7isDT9tiaKysiSNF8C5n89LO
gYBLatvate7kJ9ES43Ton/+dhXX1bbe/7+BaNON9w/c5ucGwQpvpvH7hcFqFazN+
DGbZbNnt+tCgUP7oC6zGw93kPP1ZeBC6hDMGL87J8pUgm+l8TrVgWt32pGWyfEw3
07Tz9dVqpZl0YASqeVNcsXRfxw4BJ3fkB8hGSJoiCYC/AZC1IPEW/YZlKIY18OH8
in0oaiceoPlhYB03dUqqT4ZkWagYqMjXXvAvpzQcgSPJogwwlCGjGu7TP+EgrMiO
8v2iinUeyO/JR+KbkK2WBpcL6zv4jSv9edL4vSfnPh8Fs1gGDkzzaH5D2Zk8dCoS
2Rnub7+/DGITZQW9Dec+8qF1x38rfm1cy0i/JLw12rnWteA/p8ahOnFkgzV+OB11
rk8cQ99kpjUe/Ho+6zRqpG7PcQMKMGAZgo69eitX39aeeXfmMluMfWw7msOequcY
9chq2CAVI5lxm52csW2Rytyb9U+gRp4SqJJzYThtYUfER1qJaxvPzh/QvwPX1uzY
7rT8CMYafSn2eaXbcYq90Nt1fgi9/L0fisJraM3TdbDZdKq09c6Wla/tvWhY9tO2
vJfTFYfx4xZdDlvwC5k9tjvXocNJrsDbcTpLiNFvdx8sPkLywF9hR1jO12CVqKbP
QMkx1p/wZf0Tgpi1MMK8zcuJSnmkPi2km083ZIzKPNY8EN2j6feOvP+n7HgrBYQy
sFD24BDO0QmQff8wFb6N6ln+QoOy24eWhqHFFMvHHE11wa89yuga2d4HitsE4e3X
dpmS3oighbKNcsgUxCxsTXDSGSsLKCj+uRmmsV6+Lz8tQvPKHt6qPEsUH93V/P4r
8GujjEJTSx6+cno2Lp6KSC2j5omGXLk2uv9KC372OYFrJX9yqYLMaplWWrTaE5QU
++41OOg1iXVfKHPP8XKQx9abER/MibNnCmJz5AnRW+wpjvngWqet91dptYn7aBfr
7eaaT57xODW0R2DFIX2GzpkWnUVf/+EcA/jEbv0r//UuTI938Wsocj6NlU5yF64U
ScgaTAGzYPUyImZmW8jG1X03n99vMxe4Bw0kMnFRk4hMnpbLOQk5Qa2se6k91GPE
1KW7ScNHyUNntTxXcRq0GCEAyWjZ4yT5Q26Sr/q3CcMkyjrFBhEVD0UjdNlk7vwZ
tQ9UGLwvAcIuzxQNNy5950AUJanvqne175jAxrBhOKYyGkGEQdg5sSaIZjk6vPBX
MOg0+7rQlJ6w8aRpaMy6m9mXGgghdnzBNGMiXHppyogm58MI1aIxRPOt3XIVb75x
+UOVZ/F36ucHz59+rxqQ+Os9gLzfH/LibnUZVG4lB37RyTFngSkjWLa9hizwy1GU
BcR1mvN5jmCzQOgy+QqhkZXRRHRLESSK6bpBh/HstZ+An3HX6WZLPM2JJ9nvoCly
pNh7PIWOJNLFM0LlO5XF+0twdTDOj//3fu8u0D6l4TZs/4nfEz1L8HbTazrHzZ7C
D8/+EWoqWcg8s6ZbeCQ7eu+HQwMXNw87D8mOYcdyaRpOt5qapSXdTsGW4TKyW3Rc
Txv1/gQjhtasqKqqKTn4kRC9lRybaWhP7ox6a7ciqLtYxWG9xslRtWzxPmEV420b
0HDExZbW0gUpCjGVvnfA8OCaGpuOuyuFRD0XLQKCM/rec4rC7IHDv1VkHK6uYhb4
zsyhJe4TwFISNnvCgo2LX2YunH+AHeNPI/vnuAeHPDAh4PTSijK7JT5geb7V/niF
49Fg6yrNszW17CNVI22sMPaIuklqNMDuKOLmjm0G02uLTFrrj6PRh9nTX5ZvOhyO
r5PRBbz5YTXSUFkM+vudmPPriZ6R7sZa75KKN/7LrZzp7uJ72NtshTRqCp5OFbvz
Xvu3t0v4XIHx7Knd5JQ9DI+j7X+mjkBuUMDhFPJ73zyrRXZkopSVjD07qgfN8WqP
rHGhCaiFxZVuxc5nmEsFR8LbPA/YLKbZhDSylHNJbJN9dedgl4ZPx9mjPm4Tgx2Y
Ga5sOAm4DVxIu0K5epvY3c23D1F5l0oBjOT305ZETAJkr+SlMlfB43gqwwRBhPUy
0qu0RGFoRib0ZxJDUEv/lpIsY3BhU8OmgijSLFEH3YhsrwR9JtMMOGXnG44QxJ7s
D2fHrnz4r1ENdRWKzyeImbD00eujieCtnwuR81VenoyfwUGuszm1X+FJMNwqz2ez
2W+Xi4PZFd53CKPuXo5PKc/lW94Qvs+3TZ6WnUfhj6zO19LeNXt/p83RPq8SgMJr
9E655kj1ZFgW4/rFAtGrIX9aLAvltrhooPJo0lgFUXa9hgsqM3h9iX7z3I/faM9d
QLDhJe/dGM+EX+FubExHmyiulXjPV0zPnBU1yHOE1ip8R42VP18CfIsZMvnASUWP
7tu6aWoLIcR6vC4b8e8w+94XLBwPCGrhw2GM3itzpLEFvFUSffEGfbN/vyay4WrQ
1d/Rv1+hlGwttecZPz464XZTdySsbnw73L7LPtFidnJ9xdZPxzutRT/GCswWz09L
1GxvNzt/osx4P2uib88CBkh2Qx2YE7mai2Qj0KGznpRryRKnKHLQn+L6jExMqc1T
Y35XHRamAkX//PXnX9wedMlVlPFuY78x5pPZKqa2PxNeSd7nRC+Vq7Jh1zeOapL5
eNsqpV5mUV1v5eHR91rFfvrADzeD8aRJcHN91GW8mdhZ/iXcX9hRUcnheTlL4UlN
No27/3vFQJfI8xF0AA4jWx1LkZWCE0k8jK/ImlBNLHIEWQUXHeL0g6yQzYBsS5p4
l571R+zhlH1ZbTs78jOzgVoKCZTjn77yFfTtvQe6AemV06IKllU6bDhu1uEoga1F
3MnrdU453KvMDjjEwetzLMa5LWtA2tbFETqRdg2HYaXiXsnX40YG6HhuVh0giEqa
9TdsFV8jHYEWbYxBj54yXrnfyaznDMLucoazM1FlEMtzqcU1Xp2Sd6T9xNUGPDGF
02stv7xSjsO9PrKUR6Ql2DNOdKaDEXk+4HEhTBOmjdJGaAf88Ec9JeoH0RSHh/C3
CXwLdqaPwJYNqerwh+pZ/ZtdT1Z3hMDEUXlNqESNWMDKxIBOjpTL4ysHeKeV8dI4
rt6psm48LdnwRoYb/Dq+k2rvROvRAVRGtkJs1UgH3Aruh3U/Lnof2rQcvA5ji8o4
RkVjRdM7Iq9JW69tmCZ5TGjVXi3QIahr0b3SMmNJzzQsb3RthTUoKmlfiS6qEbYm
DVcHVvz59IrRIjF74SJr2rruSTFVTT4FcFmUZghgXhfdGleKiQwf1G/OCJxnzWp9
w9RgalaZxPFab3Nn8WyrZKiue12dQS2qJN1Yxar0yNtVFJOpMMiZ34JuAD9yJaUS
mRIwTjeabFqsAhjZYNOJDRzgBGhOVppl+a0zJ9xmCsTu/nMkjPSU3LGhaZ5w2ivv
GtLTcCNaULMHUPwq1nyEYjiePcw5/Cn/vYOmOT6W/IdSCkI5tXso8923dHrIJSX7
87Gb552l5cF7H2h7sXZEdV3Ov9Mrn/n0RJpVsJZgsq5mbg08sFRXb9eXeRfBDf9t
5R6AELD27Bim71Ai5ft8nGsBZqKncXfH534trNiJDzptl3dTjNeXFVQygEgowhFX
1G7rHMTTzZI0rXRjr9U9pHffiSZPCJQ8lKEbkPIv4EWtMf1ENMYzqEbkuTN+PjUO
8BtqrEF8RGJxUeyUm2Z8YeYCMtNiukdV+3rX0pal6hTonVA+2leVO/rtyO/fziP0
Qmp2INv1afTZSQSkvDpbFNAb0zEYFEuSUakZuD8TA4ajE1rTnO1miEpJzVGvjn6X
k6hizQSh0Ohba51oaJjpQa5BrF2gFfanufssoNWMUKorZ1BALNp3txAAVVOBXcy0
/NPYtfObW+K0vr6ecVD6uqhTwGf7e69cPBpszfByXXGBzvQhKsjY0E6vY1iIm68j
7cyk1jFdmEnLni0pUtcZc268qjtCWyLhXcUxMBvlWi6dQj3y4qkq6zYvGUIPTj08
Las2ibOncPXquSfoh5iHi4EwkkH3ji6JRplWkXaZfo53D3M4PWAZmOHiiUyGrJ6I
DOE0NdwOomD4kzGA2YieRP50Ibp/8C/ZAO6A4YG7hPCspws9XkDyhHLSC6gvwYM7
WXKqKhaXqg1iJy649HG0FwM6DhUlfIun/jTOuX2U03siiPbl38RnOPNcf7Li/Ah6
ec72E537bPrKPP7cIcDovA5v90r8BnSLoC2K6cnwfZcanVd3+smUfhF+63yAV5cU
6Cx9NT6VasiI3QC5aiG0bpSkzLpSOzcmXIi/olyg2K5bB4QNinr/VDW5kkLPRQRc
Gl7jVD01oR7UmoOPBCL7CfQ+/9bCn3q+yi1f94VwyjFW2tEhBQ2ChVZya0+eCGZb
rQjaRPCfG72/w5bRe99LmFNXPeUqRN1YfHF+m3rydO/3GcmkPfew+HQ2zJ5kd5vd
/zirrUYhbrd5XtDgUvUPSYfkPdzOJXsxxKlyK2VStIpTGbeXtcUpI+FS6vztpa7l
5ayyd78HKVfgY7l9SNzUaWFnE+HgRHYFFtkG0LZbrziwBYiZbdJqjGkEwDQDZJ4B
MvcWxZrBSlFHCqmSp6S9sBqFzfn7EUlRP34vIRI1BVUFZeO01fi9mlHbqmvXq9Dd
UVdsXt3U793pEvQt+9wyoBV5U79j1juLNE4T+jomxy4Ukc+gIIlAo4zpPJHSjbR2
0RfePOpSsClErXzU/BKOjDZPOAx14qyJtKAY8UQvSqgrcbYtoc4oI94ulGSvppw9
5bv/REfZpDEtydt0CD/ghtBdWSgS8oc8qAPtAmEIZ71Ipi8maY2NwBqw/10Zs9AI
AbQ92baE0z1MMbMSzI/Yj9nTu5xBQNKCgowqK0YGyF6z8YErBZTqXpZ5/4g6RQ2w
7w6QAvBI2oWaR18SuNtMl6Cpv0SBrE9Inw+q81osCKgyfRyJm2s6hGUKqqugbr3v
aM/uIJrsExCn40MEPTqS2hUFFYqN9NXI00k1bPT60VAjQMv9ThiFtKTHOuflEiuN
m8/gaingXOTwZLb7fDOP7/22eYL38+VUMW71qRSPuUm39+Wq0K7o9x3/O8hzOScN
zgJDlY/tJiv36vXoiqQ3m+U3h6WF60bTaTi9oiKEBNittutDfDKSjr3kJVC0G+6p
QqyoWcUAAZp9yTxYZjBjs4Eq9ZmmqypKQbUfpy35piQZDiw9zRRVspjA7NOXSh2N
kvdclWbWBckIkySb0kFsMBfMDxlnLpfgZLkGSSbPoT2XZHSn+82RcLU0gyqHzE48
DPny5ZrvK+n1xcH+COhpRYZ3ThrCK2hL330R36td+1GwRmUSGGbwWAqG6nqWPG/z
GXUAW33AfBVjGwI8sGoKJD4pQ5q8h52vJoSDyESGgS7GY9RTo9GtvBUF67w6Ij1C
0Goy0jwJPoN9OvMTaC8daC+saowZIiHisWoMJB4po4QUDi2DbwNRHQOzOBANijTn
eC4QmKT+Tud4zOGEF15O47ZZyNbXRfXjyuufNq57WkbYtPP2i2u43ZqJWzzN7YrS
7I0fybbiavMaqVyaHiX339VQj2B4WIxrEqaQYJfMgfCDOb8sc3h51hMUZad1iL1j
i5/EgZmZ/L4ADgW7ohbbUaGEAU3MtSzeYJTGMMU4zyiTbtLezyieaqB+qpJXVbe9
W0OBW7XOWbs0NAO1dVq+hxt1lx1nYSGgIRyfw3PxDAKcPESNmrds3KQJn3Dz7OLt
xZv53dBZ60E+FIta7I/bQIZbQrrSNmOwji1W51aBDg0fvX1x/5KNmke/ZwfkxAkH
iCqHba3gzBaN6r9VuLrLRQqlpUjEi4oSLez3p2c9cePcL2cG8enJ51wTH01Ar8d/
xbcQLjh8GWorxIc/y3e72kotPtfXV0Zbmq7Rz5/k6/B9qZvNH7RPnjrBHsBS7MLz
E0vI34hGrIB5TfkuCzqZ4T+/tLZPJag8zvCnndrjbxTCcuHHsnHKfBMEVBMVK4mU
VydVVg5WfDrFgmjPmw5N1EGVmXc3RyNefijx1jxGhDRPmYTgWfrDh3VMyyqJJ7V7
N1I/oO93Ff7+4GZ0sI+b153aY+n3cW3YPZvji+Su5Pbb7UeX/LOFIu33PMu1UZyW
f8dsEz2N6/AiQf8gxZQ3aeABb6j6WY+r2T5vSQ2lHmRSvNLAiA6X61sAaJKWzKKR
NYGqfprG8rqhr6P1Ef+6v+ekKifRygQeCKbglf03F4Jbr4GsrvdIfk98/JYbLw09
1IMCqETWSt1vTsYx0MmNS/3TnjJ7aBYB+EIuNU1ldYzlOG0MLU2OlZn0FP2ETE1z
hQDkcHfFjwznu8JGWZUKstIn5d32t2mBpLiKWdugstGmwabexHoCdRN2k01dBAEh
CLzuS3FMBeBu776NJkvdo/78TRELFZe4ap23d9SPjjD9SV+vtDl/juAiSibFYFyb
UydH1jl7RkKB1/hRbVvwo7LqRIfciSMwEokQFqrPoqAD8A3pNL5DIuRAgH32YXAA
1jXElGrFHVuGep6qnqhgyX8Y/Bx4//sHlzYUsdsjwzRGn6C6pDHUprqABfyesxrm
xO0J5R2KEhLuIvZMXVmt1IgzHj073Z3myHcHD6dqwhpWjXRgID4qhFTn9ofv4npy
D0pK0EEuEIolx41PMEvO94MibZkMni4VZh4hsNJifdyE3yf2+3QV3T0knBN/MrKt
7ODSwf7pjg5VpQ1YRo8b/C9s4vRlv2IkXW6fYy0MJKpbRUGCMpfVbSAOmGiT9pbZ
fpiThcr3x/LqcfGXGk63z/ejkUph7R7/GtvhXGJ5StTprBdhgttk0T7dFqvntHnr
NCY1NaPO8uHfEZMfE7fopRK9jccNJTO7zjK+7zbiqtToira290gGNB3gaF2o6JMX
1DgWm2Xckshh3bInhQuUYtrMyAZzZN2zu/i7hbOTMlv/yhWtKJLqyUCZUFKroO5x
LxP7AIMEl9xvyluV/pkzsFQ4HzxQXgef40/Ku9Wuw3lpZnglyiuUG13JHB0l2sY4
lRNyvJNvqR+B5jLcrCojYmRQhUxug6x1PfclaZVG0KyqZWqzbh/TgELT/dMgGnfR
MXmAUhBYwLHQWiB22mAKunnKN+9MtT7PfkxY0qwxwS5VCZFoF0Vzfi2LyNy/jskr
BmZkgbH7mwd/Mfs4aOIK0VDKBEMAimRjKZXbCOYOvJiHA4nsLo5BBAPkxra/EJjh
MeZvyQyhw4Fn58iboUbwkvECyMb8KbED7si4V7UBA1cas6mFwE1TgDNhla1RDLSG
EZFzHqWam0YbryfdZtbqpaX8PicCQqo8F7ap9Lw/LlLoKD87fpotpkpaNRd2i3b9
knfc7BdwwnZ5Pz4MxDvrM2aLk/bUBDhJ0BIUbbRsSl2Zjm/qiu/ax2fqNG7hJtdw
Luax3jYvhzcvC7KAQq8Dsju1EsN2vXTKysL5BLJ1ksIbsQya5szdy6zK7AKtAmvX
l6+80nmoeYx9JH0ozRnUgUv+WPc08bdvNCxtWPqMNGy2jTZtGt4PoDyqka5Dlqyn
raltknAN3OSu1lySeDtPn62Ysl/HDqqZEbt2YlCqu+ENnnkWTPeBbarCD3yiZCYp
iAuPUcU4KVNf3q23q09JyE+NkxjI7SPwxFxc1s0ZHcY8ke6I061V9riVfcjLHg5U
GUf0WnjYXoaAd1/suju+nx+NHx9sG0AT9InbcAbwFbQa7mDuY4LZDIoiMwyfuijz
Oilez3TZ6X7Qf28/0Nnu/pSexfZdUFzm+V2s/HGb3/SmwyvwWHoiNLFy5cbVbDtr
dtv1eza1VYMbzcYBFjH0CZNdyGVkWNc0rm6BbaT02fIZSGuMKLm/gdhvt05l3GRf
3Ma+ie4p/dp5dthTWi29+edzg/OmJJ/FiiENytYWA+W4vvBqELSSuwVYGeVMXNYK
66SD0LPNtM6x+lZ+ZbuFe2qSKcYdNx1pEAB/28PHlxi/qj2YfHohVOG5yKdMjc/C
qYaNJx2NoA7gzM52rJuCLhjOqBIaZRgjAEctlid5D+ey9h5y+GnOVwTYtRJ6u2JX
ZYeCM8S5SectTHtHjpmX+gjn5+gvfQ53OwWnKJEJJ+mO5/3gL/K8+pO80mS9NP64
NHwOpcvorrkXzhvBAyXOt4DxqnD8ut+FPsXOZZDPIQyfU8pU/nslVOnn9xz4amvR
U2uopnY1XKnG230daoWn97k20ihnW7AQ6hCUcR22P/U+o9Xr/T3oBnvPgQVBiwmY
40FvhsSslxzMY6/GQiEzInGyviBoEuHQsg5wHHtrAE/kIIg1W9BFPxuVg0fO1zYL
crwzAxiws98/o9Dfv+8gKzwWVsqFBlYaVrusc8kxOPOmYr3XquXTU69bEyS1U+fT
2IECqF6BDZn1ZIznuoGvXpeV5RKISX+zlitw6xIw4INJiP5LPAUHsG4vCaAXKQE4
V44RNVmhBK4EJerQUkmuMB23oU9rWsh8Ua0I9axpoOHyKt1PEb0+PoOsC2Kf2gff
BAv0+KB2yORCIGctGXvByaAZ0h1WR+Yd7Dirc9p+171RY9IsqHSyP2HIECcl3/NB
LE59Ge1w+SjShzaNpmDAeT7hc6x3+034DePye/66duh746S0acPE5uozNqLxIdfj
s+zk3HA77ip8ILEmr5v44/Sxa2k92uPxtNMsdMoDTHswgNwygLdfqEpzwKrolU84
R+U/jRcQRhOnnteIGbiCaEU5hxEP7M0tGTh/wR2k0rA2SHphINEqNVIbmtHSVs51
uGCslxANH+LVl/qG/3KjNx2nyYhdvSNtzn9ojDhXhY90gIpqGFEHD8W+H+9YIAEx
gPB3cpoBb9UJRwYgL8IfI/kLn/BmLOmnD7Aj7iiJaY0vWuU8WysKjoY7jpsSe4Kj
6j5JZsu7KoSs9IY4tWqYMxWrnkm0ewYARoKFU2iooDGsDoxbowV005ifbHL/51Jp
+BAWP7FvJb/GnZs7stlmElXtLjUlTQbmuRab72oM4bwgZhJVFa53673Mwv0xOub0
xJ8wtGhUQi+Q0H1rFrF63Vp16/iE8NXkxLN1Jh1tjIqNbOv4HtNJ77X4ZP9m/AP0
kfsRrsTPw5rn8Hg46CAoko5qR7unWXuXrdfOQufd/vHu62Mh4h1J6vTS7GSW2obW
jua37u3xq/ZwF5nLWzenNOjamg6i80kwsYwB/UY7tilR1hF5xAusU6FSecCgs7wH
35rBg0dFRKWEsPe3LK6Cd3r1yup5/Jhecb3IsX7iDMlaxjw5sPodROuQINqQqj9N
o2VE6z5+BFsL2F62M5mo2y4kBzUh0Hxf4BPhk8FrhFbs2uWFAd450PBqzwC8XggE
y9FAy2zQwaPdNpEnnlovYXZdy9HZ1iamkW0o/Ass7JLTIVSsJ9BeGGA24mqHmp0h
7f1t4a88fpQAi/d4qpw+XvpkdiQi2ojf9LpBDXbHwcizL5ZOxsfZkkpv92Pf8+zU
j/klXY/3XQaWms2m73fzJmbgYSSlmcx5WkfQiu8XQDEWnjlP694n0WoPfsp3y+Me
V233D+ap/6WB9qqg5b2OeVgzVYwPhx260Zb1lqU0BlfMaHRptKdhNGYaplaMlqPI
aAxGIUXkN/dbCtBV5LwEW79F5ZlxkqxeEbxHVJeK7HjOg4PGKkVeIkaC0YNC9rij
KpxREsBX/jv7MT4tiBGlESBoez7mkkk5KP/KINAetqo+/ciD+SA49J2Hjl6ZBSE8
9hHBGpzaIQewZg/1uaBzDAhGfU93t87PZwKRGY/jwVXYVpo9VIPvQc5vhxgCHXSt
7mmN73ejVOKyT8OobnfjaOBVYrHq0b3KZv1YvQhHyZhRfI5iUVkDMhQvxp9e0NBq
Q0WFVI892UAPd/4QLfDrYMkh8KvnwrlY4yV7G2TtoLhAeW0nyFr0P4nHOGu7ZOhi
rUkUSQhXuKtHI4HRqX6cqN70fRxD9ncEe2Zfg2jMdhZoUJnury7q89L+PYdPMD26
yc+DTmTN8fbhFN+FrBPW1bSJcmNk0X73PphKvrXZEQx5BKhsH0IMhcTDRAY5YYW9
uRcH6ouMODR/s6JaUOsJ3UmtRbIQSEigrgfomKHWUjM1zNFseZflCesaw+VagyBw
gO+p4qsG0oV1VhanWWKyh4plMof1mjiEhQ5cCx5boSI297+spvvt0BB1K+LlERUy
T1yrbBXBU8EdozPRe+TBbsL0Eqoi0eYLgx19UkQkcHy7BQbGSpwaCVLN301pphLq
2CPYRmdnXR4fFzOzdtPBm4gHkEkCBv7Cel7XePPSnHoAkPKvIeqQzdS2FR6JNSKT
6QywAHMFMnnafypw78DkqsbOaWcTOveDqikN2DgEly1eQChczUqQIsT2CXG/fXmy
l4btgmSAUbktE44QQQW8X3LHusSp8TbqH3/PZ+14Xr3r3JcHpf50dRusmFiBjkV4
icllzdfZjebWGL6c/bUAvvGpuPRdcb1uNsLr6LwElqXqQztn2otK2ylrR5Y4Ndxc
gn2uXdjVLi1iosUxf0xWhQpuly2GKxP7Hv3G6MVmarOxrWWqAhDqUk1aNq1H+ShY
0kdDYKdH7ZZit3Z1qvI/f0052aNeplYPaOdv2sssnxOYhm+hh+Ji/J2RLcMgID74
giYc6UOc0lTZvYjOOJjlxoQtlaVR327lPOY7NpP61vqm8CvVeyESnDxEafIAzdpu
SH4lgoAUfUJCvNIl+gqwGk03GclLbhR7J8p2P6GAnvFIxL1G+kTlaI+AK4MHyv7E
p3VOKIR0CDQkQEjg3LonJV2tdEKXAU3CdSC3BMp0D9+QmdkifsxPMgEhJzblOHVo
049c5XF4Hp2Oi1ORuTaBorP1UJXd6i30PS+bwOrUXNuoRIXrOc2hRShngva0ZTCd
lwRy3seNW/s+OsilkSXiVtW22pfnV2Z/LvE3Cb4xHDTWKTSose3pl6+GtYe9e7lf
rSTKIep+/imfUD50bx5fP8K51auiZp1RRONC8zJ7ry3ALZSt1yXoH7bsGGgQz6ye
YqVpSPc20LgFmLRHCw3OhoVgngtaNJuG66bndhS1as0CWC4V/gXpOxUA8KYEcLas
Gfh7oRvOu1T5gT4VtzPaR+T+TqJ9/ceaihgVK5mVkPCgTiMiiYkzQLusk6MC5SvM
rm8Y2qqNxAws+gnW8RktKTNLvoe5gXrdueR8NBDPrdxxEySqO9MhkLGfXSjDILk+
nTbVSMewEPilDJzlnw2a96p80+8Z4Xnn7pUrtljuxkartcVm1eZy446Ie9itWvq3
+PJu164EwdLn9NrN97OydVcwbKX4dPI9XYDM1WJq7qahjGcpaimhQhtNalidWdUy
4lTFk/Ix9IgmxiYWA/QNNJj2WQfT8p/FNOMiC1NTX908o5b2hQbaZWTHxe/ql/3N
9ij4U/jInRrpceS4KPPpKQGsTN1EvrQsL/M3N011GhYLGuXmZN5j/4SghX9fAUlF
JrN8fcky0cgQ0siQs57wDuOFxaBKxpDwfQFwzcb2Fc0sh3y8wxvAu2b4XT9LVV4N
pdIRFeFht5trWxanP8ZJFmd/hf12iYOo7f6PLE49LRgqhHJJAHk259PAcAQ1UajS
KZ8O50BpUAhIvFGr2OjytHK9OslASRQOeDufnVWNl2Ufz+MKno79cz1WifXFubvp
cTMdd+dfEzPPnoeJUIdDVlNcd0afl9hJUOeclFxO77Pr3d7vFTx2um4YyNXLdCEw
DyUs9f2/FdKHjs3cyHxQrGK6BJfRsEHz+k0d2KJUCdBL1KB56dEkWQjvavBOCmhU
9sYq0DLfcqjOAar33SfwqhIrMaHHzv33tPE6A39EG6iuBqiERLnEnD+VQEaCbJYF
jVlydGcKB9hbDwAbBYcJL7IurQmpiy044sInJfOqcgL0UOy3Xoby313UtDnMx+ID
1DqIHA/uTdDg3FvchXUeH2pe38iX+uUakArnpB4s2Mb+3AQCjkjFDEKSoU3Rqpt0
Tbpb7TPVoE3opVSJ6s3dXrI0fPnkIQpmoyhRlY/zLdMvsy8zL3MvMy539NX1tfU1
9XX1NfRt5JrTtaCRQUZBSX2iyjKwZJqRmKZUhdeSW9N8ZZwjTPKQvKbtbl5SLDql
kkXlDdg5/FLuhxjxVT4iOwOr+86kIrsC/4URU50P/ecAE8aCPSKIFXIStSxBj4yi
JuVAl3I3dprtwneLQQGZeN8TA3YJYAiwCMAJIALM4YGHoYbAhhqb7ysBgOoKbL8H
oAsG4w+6GdV/I6KWGKbrZBBUmRhU4HJr717+KitnFWMp5ik9oZkw8jCIw31I4zop
4DYbHMsncjJ0dnClCPPKLFRXooU2p/VzIentElSvF0w66MJFrX47DgBYAej/Nvqq
8L8rAwtGwwco9c3qqYNOu4FdxaYp9OdFSobB/zQCBdo7BNiTqj8spSbHTYHLE3Yy
MSOprLSuNk7ZylIQH2Jy4pOHn4xlzCIG2AGENXabGIW8Dly6/uv1kk7f3tYRTfug
F78HN4Wh92cU/BgSe1DTdcYEsJPKLODe5ozS/fVhvv1PgLHj+h+G8S7QEnTM5Rxt
ULyCueUhR7Zks54oNL8+D9w5OBJpqhuEiEFsWXbl0gtFEp0AFlTCEUSfcEqeeJEt
9unWYaEiAK1EmOISeBoK1kxnCQ7hv5a4aWcSPSep08JjWhqO05ksgopHZbFatDKn
rZyoZJH3We7L6gp7Fdshk2d1yB7cYXVQlxtXrbt1Fxu8Inxe3/0MQZ9p2zz7I2ol
7Iqpqe+VqO7dKAVacDt8Hj+XbLjv/rrIum3eL3VRBz9/J6RWonEddCSYPe5hnL4P
S2Nv0eBO26VDVILUZHIajh/QOHJQTXtMTCaC1lJeRruHQLCjySoM8PpqQfJRsLr3
bdkUItxVrj4ZBcTFTTs1+SHLljWMCzC6C3bUd6v0IsW/p9dMATG6VfIW3C7iDlrF
2s6nVfgBtKnB97TqlYMRa96jEm//lBQcgfWfAmYfKIIe6NnTZps9o33ztgBcDvi4
zbTPMYO0ghXyQchI8zhkYm1xk4cyeYippHyQssUnjhPitVYi+bT1Ds3LXT2hUC1K
w+iqchkpvFe33mx0b6ZQR3D3iOAwf0KwOhEt00nuttdfmhVOBHlH2wLScc34ISXH
rksFomMRWQujOnlUFijnLFRk31wURaFiautCuXhM37Fy0EsXTWgdvToMs5A3GebN
hfnIzjTtx4zR9L+DfKLOQBdAfG5li9r/+KgivUAsgp6auc+F2SqOiHH5LLFhYm1x
ssCpBQaVBlpb2FvRo0yBHOcXi0/lwmN/tbIbjhSOHIoKCx9NKcAa/wFr8eJ3fywT
r2+/lXYdHyJv0idizfjr7LxHNkI2NDz+W34jGHjnUFs5LQkrICyg0axxrdqTOCNU
X/AwkQpfj4n9poF3M0ipBYwAbTj27hnFwHHn9xa8W0cXVtyh0tv7MM5Q0b591Wa5
1dYJ2sK34Ht/wOCjucaj03lzxWO4FSxzqQED7SNJL7Jwmo6D9M3YGnmgBD1kPKeQ
E0EuGiSYoTg2L1cu7hutYxoWgKm94SCC/+SIF5IIJBYT8ehWWTgCHlSy0cc0pOrd
DiVGb+wgHMVnOSLuy0IhENo4y0LkDToUBW2GZ8mW8lRFymDsKkVBwUAqzVIUd27I
OMCM8WmNCQMzwuEMm2WXbteVqi1Ua7CKUcOia6QptlrfvHD98RwKMyI2DjzSKUOX
SCZdG5/2zCVjl6iXwUvcy+Yj8mPJKSWbNXHPScp3nykpPrA0yxxqvlZWyNG9DClf
zIkGFqBHR/C1DPHhrNn4aMF8n5cdsBNVv2ci6HBQSCiZ8Vd9St8fBY+MgVU8LCks
qSgwTOTufv4jAx5awZi5PUYUCbsUOhIizlFemrSMmtBYoJQNA0G1QFn/VjZAYJH5
LR7dl5m8SStoEeT+gLkIw0i68M8Jnd+oBRpBg46MjozA7zgSdzrkkKYTr2G/wmDr
/Rd64hy4CU2rJJV76VjdcRtXMEA98FPx01+9bPKBiU81r0W18YgarVPajLbE6lnP
AOdwdR+Mtf3kxw6jzhx0EIOoi0apQ8JR+24y3xGgRJR5gS8wGmyG3EKgy019ozJ/
8+N4IaRT0jDheyVIz+gWnEKDZn8DAlpsPkL/XXKXPjP8L3wN0VP/JQ5vdZ/fuo9c
8MeZ4Zzw1sPboQgCEEjnRcb2pSFaF+39NqheMYAE8iXLnyQIwTMzQHdZWYsRc99m
zBmqk6uP5BfHpjrNFY1oWp0xdHvKNwaLHAyGc9BSSe1ELTzW4CmPupTIJ5PQourM
p3k4eugmmCTRM+Zv8kHxR/lP8NHiGaqrwxyoejmfmkfO7ecPlNDuDp8Xnhm/8xlM
qalYREVDmpaUtagclJuforxHzEHNQeCF71Szc9aW6ehjoQax1tkXq3efbbCR2ePZ
az+n3JVvfegshq41d2JHlSPWhE2Rm6kCmzHjxknZA/ozGBFPr4QYLGjWbuPiVMIq
n67a50PtCcgrqkMA3+bV64WMqdhgivN08jg2GRdqxypHa/t0bFKMtrFSIi6GX4wD
pYC+J+v4LM9AvwC/9d74k1ThszhdhkxpUJDfdOUw4C8fYkLf7DkN2vmT9KuWNSvY
boISN/YcCZE4AKdumEdt4+Z2BA1bfywCC8Y2B444sAkFSFeBi5yG/pu6taq/XrJ3
DkECtWJNcTMWpwzFpK8Yy5JZ1d4Yqg2uc2YsStbREbQM1awEAHkyC9FvNJkksctr
xBOzUxWCWSFiiARnT+vbT9GX0MGEQE1AhbJsLO+dman7cUgaSb+9o0DHZbAdvOa3
vwTI4nHi+Lnu9PByRErzEDDXK+kkI7D6QtQiDSaxLUm6L+iCcHFRemD8a55+X9g+
zyDCVViMYm4X73Gg+fh4BAIqhOJj8Rw9SniTqZwKE2xH18dsG8Aq8K+grZwbJbfD
t2uiH0w9z6hynH5ODmy+OXLap2PYuyaR4ww/VJyEM+Igo5uMt9cOK/GOxPBvsmhx
JbZHIKPTwkfaVEgK99kF4erEaXIgxBLDiDgZO7237ZztF+3dWh/aTWZiHT6/TsV+
AEEeb8GHNK4qq8B2eKZOM75jqte8biCO5HhWlHr/NN25GwdHspnj5n3SyL7/djnT
pXYmEhV0JokpWiZHan1if1zQz6B9zUMQfV8wIuaGyehvwx6QhUNbyRDPes9gcF7F
Qh0Oj+pCpeYxRosJZ7dqb+OatjVFy0vzU/NLPc8ZfRq7lDaaF1ZOTI3orPep96r3
rEtHysol9mpn7euW6fbe2tnWWcf2t79F1rt/x2797Hfxud2Nn0bn0u/iSvMQM4LI
/KuuRUYGLNNgU3KqasgDFQWEMK+mMEa4NxFFKCgFYoq+IXK0goKR+RdxB/3NGgYb
rfN+JMg7CbW8aoeDyIEkm6Cgobh2HUFJ9amslpos43WWXNbMdY7brY/TjEfYjvWZ
+b7qk8dWgX6Cr6pfqBhhgB8fnxo+0K9lWhg4NP8I4JQpISVIF65cdbl7PWB7vmLz
SnX+kAJAlpJKa1RNXkh0vDmkTSjIyeCZ5rwB1GQnLWJq52STtMP6FgiWUc5r1QX3
lGeQ/YfwjKZq8UbViMpoeKbKn7ICHrxMf8Y+N2owKiV7T3Q6mWx5ECRC3beYoByA
ol3bW7W3GJ/OPw9/EgUnxigaxIXhXYCeRRukiniB3G6ukvfmMbnH4eQ2AF4N49ob
vY7Swfk4EkPQ6H+QGEigXf8cDEpqVDFnC52QWZzBDUGSGxDzPDO76hOFP4CzBZMl
WlbA8r3kWl5hk9NVO3UwsbX2iA2O/uVLY2rcZpkur1+Zan4VLSJlL8SjiCzS2/bK
7KAz/fHWvZKIVXzBEPBthOldePurAuSQQZdI/+7Q2IXyOqomJRqUJyAaWE1jBR4D
ipCQBa1fkyywQ/ZRJMBhK/0QLC6O9BDOMFk6zCx54cFLNj1J9+50HuI9BhdOqjOK
VVSGnbQjsevOYCzEW4NhUg3UCgs01aISQyjhPBYZj1ycCkUMGIgkoi7NUdgmbFIR
XFDKW2fcWRprCRnO9MHIyVlqJaRtDOB6kM8zoItN6wFsgD29UGMu17SbuSjaujx3
2sRRwn2AvYDrMHYvcJj5bsEGdTairQJphMZ8ILuAHYyfPwIb3v90isiBNavklvBz
u2Ef6I1pYF5UJTSPMujmTtIxAgm/5++HWkWWQFPf3CyqSqy0QSY4GJHkCv+sy5fq
zCj4Y2NHg55EonfH/Gen2JETqKyKjrRLncr7z4Ao8/pCqBkZCNjJ8DWNignC/cuN
O+lNW+aP8+U+zI9VP0E7Km4R3fRkrQFucstLYjUZ7L1fKuuV05plJuhIquNGBu+S
zZ9uaUULuNNl+kuCuOV0tR5rg+t0pj3iy74p4O6quOdGQPNbOIFTPtjkeY8pCXpI
limGM4e4RuK25yT4Q6JepvqFA6CwYBltdN60qzjX3XZeFq7sNyiQoN2m/wK2/Pf8
QEZ6Bg72/yAi///xkP8DIlJWRVxATOTfjEGaf2MD/ysp8n8HOv7PpEjmf/mB/yFF
/ssV/A8pkomJCfI/i43/ff2bpfhf1v/HnPyv618C439X//Ir/w+l8T9nLv53SuP/
7Qb/H6yRg/X/xRohtWhYGNj+DWtkYGLjwOfgYNPB/z+sRhrW/xHWCPmfsUbW/8Aa
8f9vWOO/EnX+a6yR4V8P8p+xxn9LlvxPV/HvYOp/xhr/d9Lnv2ONrPSs/xIf/xur
MYYdyhlZJfW1p+LmQpbsfIKvIKCiRDz8nBkCgphYeOHdGZwZIhiklMvf2Z//Lz4G
YkY+eNnhADP5fWNNB2d+QLi/4jZgCRKK/YiGX9jyMsdFGfRU9hk94RvGkoK4p52K
WPB2Tk652u2OG99tt9ft55LXcvPNimp4CE1fgNV7ZirsXN5QHPi1Vk+PVOwCqSDo
70SsitVf5+y8M5NKVTt1jOIkXKC92ObmlqrwBfsMewUshr/MsiTc9TYyam7Jst4Z
9h8XzZNixxJ8ZJy+MlKv5r/5z3S7Cw0lLBV5JeONXCuurjELMsGPXCvNsReFaH1r
aCk6fxImRN8gJ/IxoPv4g7nVwfsmNHDukpnbAfWHz/mqNCxpPjeSC94h5jpvVkdZ
vrAO5SeLlQYrqU33EZdZLz8y/S8gmMQuCihNf4uVdunq0vthA0nbHtCDZN5nG7+L
zg0/BUlCaug3V+lKkM3Zic2PmL7rI/5kUSGq42H/9c5+OE32GCNjj3tQnGAmr6Jr
Ulq8haJZVvDzEepHJfw8XbGofn7utCxkJ6WNnC5WyNYrO78+d3Ozesr9CVwgz2Ei
kZSbKroRaQmz/tIOUw30SJ6ksCuZUjr1+lAaEanMSGq27P42sv6zcliVxuxZrltr
a1hLFToU8Rj9CPLiIfLPmM7qdm7fCJt2Uacd5sHZdGHP5FvxXDN4yMldNMiNk3pp
nwu7eiG/OvqYzFvoHLtQ+lZOheCIQIzspJA8lxJFCwE2F506p3z+Q6+pPaxUPO6Y
oszfLp9LcoyYSr6bq0TFQbHpVFFsCCJMTwSMVFQ8T05Kmq5twP1WmVDtMKh12Ic9
8iA/o10+EF1MP2a1jaLgG82IN6FBhlO40SALNHbFL95xBH0IQ3DuRWE9EP+Ug2x6
Jpn4QwojsSs5K6Un5VS06ggrDlz0rC4OKWWQ2+R6GrwOmKayQUuDfxhaZGvR7BxV
FaX6v9j7EkCoorb/O/Y1imQJo7JmZ+z7mr1sKSTL2Pd9qdAiWUKWhJSdUtFGEm2i
kBBZioRQUiFaxH+Omckk9c3b63u/9/2/86sz99xznufc3zn33HPPPc993F7KG4Jt
vueeZrULhiCNaXU+Xe5rFDyWIStwQ8fiNIOWgsCNfJttRwxvuUaafyqW1NzNa9A5
rWbsefXm29zrSLfRYsljcplnZ1+lMT04NdhUp8hJqfjtcLZSjlPyExOu6Sb60JjD
2S5qRjVPknmnZQ5n6+c4ZSW660oeKww2KeV/4CDOYlB97NTtlI3Hs3xkr6aecGdE
OAwhGt4ik1yQRCSROcfubNyeLEM3JWmeq61YvlGh0eFTphZ3nBht8znVEg1EK3F2
4SP/gKp7DEybqJ/aHdVe/1pkkmzt+6m1O5G9dykM+kQdnUvD3F3tUoMitBCD2WEe
rMef+11qIS9529jeyODEk/LUdIHz9iWJ7x3HOc9Mc8bufigRfg+iraqwSby4Idp9
y2XtzWGS4vuzvpYVtZ6f4Bwxob6q5pDVkqfUxScys+alX/ATa8WIFteGEfaXvh9l
Z4niW4bNv+3jYGW1pnt0zCi0xSV6Wv+92o1C8uHCoABFjrzQmIva7cLnTgocyn3L
XzKJCB38uMuVzldS413B6ciPVX2fr0rsHCMlXx8UsJ1LRe5p59mLEsweekLtVTS6
60q6KBOphNbr7ExKdGkuRiifk9E247HZcap09v5YmnZma0+u46shTv9Xkucv0c70
5+3eyr4m6KbUztdhh3iKp82SfFgN18s7vhnkOCnmd8mDvu/148i6ARP7FN2OXFO1
kJAqdcF7CvalrlvSVHZlckuMj2W6H5qW7Spyq18n72k6VOpt7rwp49Zu9Y/3rx+P
aZNuLusl8+kv3rYlkOiTT2qrtXVFG/HYxMybrV4jo35v+SaIEjLaR3c0smXcUlX1
Pi8cfi0h+IvyB0GmIBnfTY+y9JvEDZIGL/LtGTjVnBfDGJ835euTfbju+EXhM3nJ
+m/Gx6seiWqffODn30qEoFGLyv62l+YM6RiUpGyidH4gaaaB1EDqstQk7wzv7ova
WhJcoXsiBsuIv+YkGNNrDNmSuke8S9lz0IgLMrrzPZhZbkCqS3145KNmp2r/gFAi
GfsHtgZt4UmmjYflRY/XtB77wJp1mO3lfIOhPhG1g8r60kOwCbOJWw2kpXcsnW+W
qSIEI/KekwZzhgTe4nrxhMWnbbaXZgHG2211WR5mfJbZUV1RkCczmycsnJrT7nqO
gG9GzRNh5/xs6dv7n1BfGjTsfOSJDKvcSUu9OUGzeIPrQ5Jd24nf5XdQKh+qb0ho
ESNL/sA9l643wsn5xXXoZgPH5L51+keovO9dGGpu/EA2x6EUVTugZvVwY+mxty9p
585tcx0S7VZYQ+Xsl0kc4D/x4Z5Wl/7aMKKDpSd7xSYnGyquwnxTshwCxFJOLDQz
nk/+AOPZS+b4aktpnZZ7/YvgY5Slh188nCnzkiU+aVAS/Xb4uHdRZfvzk/uE+pvD
7a5qXN6cvc0yX/7yVl+FSe2YEpJu0ZM9VjTSatQhnyQqGSaiPCR3J5iEEgXe2SND
ZcscoRpMbniPc6x0WuiBPezxbXGrY+fLM2dyNn/euo+h31HPgjos5vQQ48VTX/vU
Y3MzzrQETXol3G6YTmLffCdpIe6+tlrSzk1nNKP4M9bVKSRvekMictW4Zfb29w98
n4KhNZG6LvRK+X59Nny+jrqbeOxZDe+/fXIsxOLwVDks02d94ABZNfX7exz7GDm1
1397mGH/2XIOanm14fN6zai7TYJNj7ZIRQ6L82Y2vekWuJ76qezQOEVYZJvleND4
/hmub+n7H9YMrqt00GWoFLyYlnlP6HWn74vnZJ4MQRGvvpAFRY24zJXukzrTuJDV
38j5qn+o5WM/i2DUNxo6Vg6xfe6fuyi0WoNv+dSUN3++9KDs4ywRryTF1iMGdx0H
hAf49n9nbFelaH1DcaJop6K7mALl+5din4lnfB6OQ4+djAbvMbcU3Gt+XjsYzqLw
gdr8gWmpfclzGx/Fi0cZJ1iqKTYM8A12fxt9eebBiw9EF/LZxx07my0/8s5JzIkG
fvSa2sh2UClQ9e3j9CZlA87OT9P7rQ9JlFyl6rwtsku8WrWoKuxl0Qe3zwWtTaHO
z4PUmM4fcZGxZGObkc3K60iKGPZmuJBsO47wL+f9KDUhGHuEzTv99AOWKGELHZtp
+fIzHX5eL+kvVG9wrgkui099Kc4cZfSBf+6w0GG5QOnpyfM0tfdMRm+HqrM1K79s
8b5yI1XwmGK4mUVunbp3uvldnfTGW1SxH2G7v/OeIna8cu0DyeymedI1g1oH1j/T
Mg+U4HhfeM2b/uuN3X1Eqd7p8jT13pyzwnIv6fvjK14eWjv7Yd3nnq565XpSWs25
roa3mzkH9uzbKt5Qc/hVw9vnd5PMPsucUX3ru/lCXwAjF/XGs18T2o+3kvMIINtC
qxNeu1G983DcPYy46td8hO3j1t1iQSYpMaJsb7pJKk+ZUVwWOzVBkrw3XMPyYcXt
gM+w2oSZo6o7NZPP73v9CSmhq1e4wShzt4Uot7LXZYlnSX7WM/mlTccekdwUjOeU
7pTi2awohOCW5RdTvfqgvm63XRPPHeezOzQbArYiDuxqnjy/L83Y8u1T54IjzEI7
xebO6ZdmuAWY7jr/TC3XTdI6/8ZkuHNVbsbFrRl8j5DbXzelvogpzS41Hy3ufv6y
YPJWR4yRecvbYblbTU5jGhvXBsp3JL4Y8+i4HHOg+0JnqRd15feOx1Y0u+3OpZzr
ZHYSJrEXNL26XcfARO5guhTDJyI9v5NkYzQc2krn7FNcKzJytpu5RjX6V5RuH5EO
ftEhdfPFSJNZueuNy/qk7w6NPzE7q/teC2FecrAv/vnFE/Jl1mteZ1OMU8SWNb2P
ts4pdd41bnaDyfXeBR6Z4n5XxLvrOdOcOq5ZhqSWl9J6KiPkb1l3phBHXrhcdfNO
mJl1prXbnZE8qWLhxtKP5K7Fb9klTdOztR+4vHa7qHHa1ew5a314cmlGqm6BkHfy
GTIHfZUjpGzjOWL2VsRJEqIPhMgzqmOshSr4a9LelN9xoBDsenJm4ITExVQZv0N2
apIZd4LfOnNJTbxR26opJ9CuV1VlPilYuc7wqaCxY/uYeurJRodjO7m0C93OBsiR
pBkVFbcPqp8ruHjW1nlns9l8hMW5j/wpxazimppr9tFKjj/60nJx+Gqcb9ypV8/O
Ul576IM8WNI1qb4rQOZp1kaPPRRmkokOg/qns183WXM6auoe3bbhzCYqzqZZY4SN
C0fdc89nWgFhXaSN0dsrJIPzrtI0unN5D7feiP+CeHiMcws/NeJhGueWnee+rc+o
OXrNkjK/uLB06yUzfQPfitRz6V8Xoi3zfI3yXuVszhhf81m76FzRGKuAwDMiXZ/N
3c46BucmfaUKDTwExNiK9Fx4hD1rctUOS5sPS4wh3kiEaFqItpo+leV7VpxbK0W1
Xyzw26jaF+3Uu0kiV3fLfS3vKWZzLbF/+qS4+02c26hbUyytdzZPj3N6UYksffQN
LXN1Swv49rwGBCz8LPfG7sv6SZrcordnLt+KXCPtodS6llabrKL3aQa7km8BrZ5L
n3gxjUDlBa7Rux7xzX2wKtVHvRnVXFGlj2zGpmSv2Sj4Zz43UtbX3ZTAvCdSU0GF
d2uOxMZEFTb9s8pWWnItsNOargHHA7/MjXBMnDH5Jr/b4ZFy8OgCg2KBv1YVsfDg
bgUDRo+vPQn863ymbVwMEwemZE4p0Fv4UNDsY+blfA3XekKlTS+ur3WIx+m2rVlt
SKtY1dA+Eykrc5E9gufZhA/5CsSepNR/WMHbxSBO+cRgo3Dj82ONwsRWRKeUczRd
+aO6r7jTfuK/qVHN3sU1IUbMcZDmwH5k1aHd59nW1bIcrJ4ymUyOeXe3TTDt9LGB
zf78txs2J1157n5P3vRZSEop71uLI0fmU+GeW87r6gxfut0edIO1oXJgakNLstmw
Q2LEka4H3Mo+X67437vx3qThqOZQSLQnu3niAOxZlmT3CdGAUjL4LsPHRubJY0/t
U1m+97NszfEo3TJimy3YJH5WMGYQNiYRd8Jdu8lRsETjqpPlHUme+qeiqjR5L3XL
2jhVyBAzazQYcwq5XiSN8FkeHHp+omrq0yvpgAzb47bMAkEpx+5td+yS6/Y5+nky
ZZ/FQb20uacDfBphqj3BaSea4rTuFDswMTFucClx7nlaqrMrZv9a9iiyIETA+9qB
10421X7dj5NmHyv59D7P3VXgt8FjuiU02KFLNJ3nXdWH7d5DT0vkHxR9itczzfJL
s+5hlxMuaGX213o8WTKnX/V23Lsuxfvdw/PuC45D7ddq+anrDpdwi/UydNlZ3qxs
rVbd99RBlKeIx8bpoprIVEZc57GP8UxZ6XQHRnPWQko7LlOwrDudWC3+evM9kVcm
SC630g7qj3YKsbNxmROtDz6xvfgUGzDCTzE0/2Vy6hh3iF7U/YEc/i9D0+vIv2Q7
SgowXC40MMiysEjM2OSA5GeIYzz89O7BTY8P5H9tm3Dqp4ZPKH5wpZD3sroStqPi
2bctfaenH+k57QlbM8IZ6rLT/W3V7YYz73uuv7PxFxEpI6dBTR/d/Yabyi9evVjh
eU1p3YJzW7tjwPixcqdkO+dX3om2RzT0PNVKxdRfCXaKrLsrs27dzXXkPiQn0i8o
d7sdp5Ww5LvYOEl0pTXuSqSs713kqXT59U25IUWnJI52Pz7QO33AQ1XQx2pj1TZD
F+9tUyeYNELUdOyOfc547chD+/qwzpCtzwljq3TTpvVUVE5PFe/7DW69aPPuEaff
yGMf+dh+d4p4ur7stFMmMy/VKdsvv3jE01lDTBsU594jti9/s1n22Qs2VYo2+QqU
HDxvwpW17I75K2dqOD06M2q3RaDKhGWsmvITtdtWxxvs69/2WJrLOwVdK/W02fOM
ZIH2BBP5mxXW3bCfLZYUl5b8seyG+w0svJfdVHcb61noYxaN1LzcHVZYdJMAS1N4
L7r9/HmWnxbdfv08yz/x738o6ffLddjPuoCPsSzG0R9VwVkKRH/QBf0rISO7KAU+
r4K7NLfYKL8298pLcyu38i9fUaGyFJISl4ELSUhLYb+iIia2bGUOv6+o4C7MiS0u
g/55ZU5M/KelOWnZpaU5quXfUZFAf6UIpylW+PqaBObra9ilOdQBpMES5P+wNnct
lDLYVLNzpqSqoiK/wl/uFnJswr+Koe0Y5S5KDV+GE3xaW0oLW2ko6Y/4cG3ztt2o
wlh3dt2sh2M0m1yub3t8OkXcDmWnrDpYANOnTJaplpcycq+TThm17hid76ti3z4y
9WVhZOHMSO1pk6K0KfPTcmYBnmYvaKzKcxKarh7ZYmy+p7PXqIeBjyjMZTiVONJf
7mZcQ9l47nysiF7R/t5j/iet9o0hNhS0q55q2H256lKQmZwB7+235ps3n3ZEvNQ8
L8JWKXd6JpxoT8hYT6rJcGQt17ubpbNvSmbG6LaRC7+/VSoiZFPOWp0f/u5rZInk
dM6D+a1fC4d2bdjRyTZ2+dIRGh+J78msLrxjx5JPCzhTJs1Tz68bS2Qalqvxe6sX
qd7oEX+G9ZYW7dwHG9YpzSHkjYXjIjUyPm2GDzY2ZEiG7ICybAMnFTLsi0RqPtvl
WTeuJS3inGp4JdTMNMbfQ612j4L4rC09jZBiqqjFuZQd3kdNBn12XnUVRAgrrj+z
68LwyX6za8Nnrx5NM0Fcnr1/MnpckbLALPq9jmmL7lTMGGsCW3sdmVNqbTe5BWl0
soeAFOc+XucNo6SJHFTvcoJU+RO3KHIpbvSazXtVvz3pQje/YpSwAAXdIWM4ZY9y
VI2CFqfRcMOTN0mHHwpmhGuoD+smQEh1Z3IP2DtSdrIxZ6G71mcZt6mN26Yo6luF
WoTyec72Zkrkc7Y60p/kgLPZD2m/m+Uez/CYMOq6fD7F8aa/dMBBmZI2BVZyH9Mw
+b0VDEeDtav3VTnePa4Rde3Rmi/s20PJGbsjeY6uFRe6AOcZCtpy2Vrty9vB64K0
s7eCkQZyJ8rCzsnZHjl/TGd/2zDjptqrlNXQPu5gpc9ULut3SSqmHm7ec430HUK1
WudRjgufZ5qVKWmfwBe+nQy99BWFvd30IvwX1BJGtnEY3OfZVUyWq/WQ/tIk+Zpt
MY5z7yhNCp94hT3PNgnY1sPD0kBZIpTo+83jaD5NnE9UZ3IdZXKBa3G3oJCW9IZ7
ggdGG/Yi1wq0DfuYPs3ivqYTMqTWzW2sNBxRoUfKGm4VGt2TNG+76cQIpzL8RUnO
BH1q7pfusRKEvG25ebx0Zn43n1lBryhU4RJPx71J4lyx7KbU7dzR9x5kru2NS7dm
1XCnz5OKTmK9v41WrUS1SemEp9bD5sSSRCnjWv/1tJGBXMKFZoYbydbHcvHuMTVG
8IRw09HYK0Mm4kNf1/Gcf9LEEOTgZpd9uHt3h/+23UZTqhutObZVKpq50W0r2L3z
0bpsK9hogn0Vx4nnYzmqBsJiW47mKzCrMfPYCESPfO5wVG6z2/Tt2EebD5vvbpsz
mLcUez4n2nZwwTemVqou/PTrEp8DW27xfWY7aCQ58nF2e7fvvHbPEeYR8s+Npseo
+gby7Ka/9O6Ly7jdrxa6/jNzMOLz1MeX5+d3KGVAhyboHggJt+6a91XYLbb+49Gi
TRPPS6LvmXVsfC3ycQM/ndkcRzXFnKaS4ZGXIhFht+u/QLeo5gUvFex6+a3wc/iH
Q3YxUyOfD2TAsqMtj1C5Pod39VXuKXN6lWIYYP6ZbtLpM8ek6vRY8P2jd3nXJW2q
fQe9sZ8TU6JvmZXPkPisXhq7nyjHNlTP2/fD0cFPuSdyPt+JCI+j+8hVZ3LpcKov
ssKU5aLgpedCpHcjJ1X27w062/3Y6xBxd135gS9rDn9ifJmuCCeVvO91vPGT65TO
tM50bDvT4Xu7S8lta5k2Hw4U4tFNcCnnqYl/fUjmTRdJD00PUdVxh8Nsqv3E1tRf
a9IkIrrInph94PmuMk3cSqdRGzVKnssZfQD+FXHY+QYqQttKrEFHr6gy7RzNAQ+N
GIXlaqtT7A+LGG2lP63iT9RKqVEUNUqSyxBtCJdDaPCCRFcK0sV/mup8Kov/WNVg
qH+t9KkqpkQ7KDUKoopJctdF68IFEBrcINE1GqKHwYlUSCQ1IHSUdROEikZElRHb
kt9dc9havStyMXqRa1wFFXWLpoTzRKRDdmrq+pAY7D4JPQOrHRFI/Gy2uS3p9U5I
lqhhrcpx58TNERthQxRwbUmwC/k6nHt7l97ubhyx/JpxmbJB1sCNXT576yPZn5UN
Jm4kD7S6d06lGPxjVSNd/NdBL4D6dy6KmcyOOdoWHoW4L0p/T4WGWKyUKyoSlWih
TgMTI7lPT6/OakcRzQWPimBuo1dXQSXmc81fOhplU18VF/xsUsg944F0uzZrv4aX
y9w3ydyPbi4VD2q1LRE1SW8QB9ZrSh7P6fwMfYkXnLhUgbj5kuj1obRDnQcDI2cO
7oFYrnbZ3u8jLQi+YMzXSzNFe5MmjFaE2T+MloHMs73l2fu29x21Z5+96zAaDTkr
e9JSUpnqmZp8pP1VloF6eLUGvRTq5O85FOj20snt4/kBhG6nw8tB48DKlFvbH82k
XT5dUNp9v8Xu8usxItMWW6izIH3zle9ekW82110ZOOXZu5DUy5nw9It29x3JzEKN
pDkKSaIe2h6qc+RmkY9UbRM5TTn5SUv1+LPOTcKDxfgoqCLePBy+q9SahDR9UHnk
nWG1HVeyc1ElSSXxx1e6Za3BH/eVjbyq2zrXzHP9TEzdxWjFWM1r5Pu8nocz1hkV
dZv4LMDys6O/ud2uGqxzirCmFznQ3O9uq9cgQj36ir+Ggli4jXpwvoDekn7WiDj2
QexmtSpG2iM75Gjl3+S9jHYbzfXXy6kMZ8pHCZFxeeTbiX3QNxrOCJW7r7lbVyUn
od7iZFOK/kL+guGC9pPZ96KChfW9kTtYxr2DU4TMxOfIG8NJBhzDq2XVGwa/i4rX
md058+n9mv7xcPqA8g8HFr7PS8xVpCawJu3fOl2zy23TRD8r83BYivsCU3hB+Nm5
4vBbCxvDL4Xn1MrHzVUuqC2o5vDUWWzov9Lff4xqJHfDQOVCqah/ZMy7ebe5mNqu
fnoZvnE9CY329IfD5EdIiwVehLKMW7JqvfVZOPF1R1pBCutxliiaDcy7aa7QcKnn
5NxO9PJmZde62eoqySYRp5XXx8d2IynucevTw+vWj5AU7ZEXHvWxs9vi5iO/wYeE
4pjE5iK/bc1pcsH1uUydOccv5R9fD/v0OfcJX6NFmX7Hkd3pb0bPHq8TehPnXF/M
dW37hYTA4qjH1FVazDeFoqxSvTiRVyvdUgo0Oq9bdYiRH7n6rvO5mF3TzXedFnEK
F7dmKhgc795F++5C/7pp51OKF1ovcbQ8y/vyRpE9tuop75S9a2p0/qQ9+5uAWKIN
gfE+bBVXrx33Ob+3/KLYjTO9PUwx+27UIsjK8zKYHa+stzMVZL4fJ8RIb/eBV0iN
xj4lLRZac+Ps3sTGsu0aybEOFpKypyhvJFUQeVzYDCNJpGS4VfCwen3hpYd7H0C9
cutUoZLtEQGU/J3rqZxjDNoFJr9xGR+HNtF8U7ywSbmd1WRrzTpKo2NPs5lKOnpO
tH117oiGOmT0DB/K6MGnUrkW+u32C+1IS6+xbW/02J9zPXu7JWex9gufYdeEKqQm
XPSyyyE+imLjfKe6Rx0HZ2dK2NT2X3hTuN1tr0NV1LeKVyc1P05vf0tx6/n1Srch
ZMElhJL1qT6mNx7x3BmsNzNqWzubi3rfuM6lXWfVRFrnXuChnfXyQMS+4mk1v+J8
ftfVjnxJF49rF9ZO1Vxxu79NqFyWeecdBgUJYr9KXmlmN5/ub06xlIpSW0e7U75V
649TPop7YOpXrHktQmNHiF/IFb67cgya5g69hTEKmY6kfmecjPTXdyedXu+aY0Ks
StSf0yk8uv1QbFrAsZJcAdE7FfHdoR+d6zhcLdtjlPPJJVktlL3Pad3R2Tbf4vSy
N5uWTaqUU6WMqyq7WF3I+mlOp1AEDxlxxhuXeK73cSYhJ/KH49P1PfJKfBi1ckjY
6JuPWaRo2qpyH5p2eHnvqy3xhqLoyMMita7vuMbZpA55b3y9s84nFR5zUZcxymf3
wW2aHhmDlQJtPjZlVEJb3sDWK2S91jWX3aQ+kDOZ83Xgg/cX71scBd+CNrfXWlbr
Dq6/yc0afVEZSaNBbicq9XTdO0XGlsZnrBxMSc6STNYtkmGnTyzEuH3ZdgBpMb0j
rNOtgzrMjUmLL1e0iq8uON+yH278SkdbUnC8NDKRusRft3HdnZ10xpUCodmTkqFZ
k0MUjy1S5EJjTrgZa2ueejmnHuz7HE6ZEfpqmvF7dmoZxN21Yaiw5dRJg6Ib6afP
DCiUnzRseyHTJ1IYln4oxpvVWs3vFM0pvhd3OfStT32NeJwvPzrw1M/d7Y1Oyvv8
M20jT14aBdt3tock2qjtn46c5qgzpktM8szVz9CkPhUbOhb0eT+V4kT+zVHe8Z6n
I84dOpY7bDYjTPze1D2lFCiwHOJ6YVnoNBYod3u6JLUE0cW1vg2eUHjgZOjJTYx5
2qP8o4zIwcluxnw9Z7YX9dVtRmtvZnIUbJGY8nQ5PkF6VfJkWtswag7WljxN/Xrv
6aoK/3rjfr1bCbvSDbifuNDuv+3arTCf7m7YbHhLfcMT5lsx8zH9lfsi5yonDjqY
vDlactL764HjyLJD45rWqRPXk58VcOgqHpK/RWFwVPOxuvzW0dDQpAOGC2fDJ5tL
mv2lhNQaL5XtY9q71mIu6Hmj9EeDtkx/stBeWg/pJ8LG/IYt7TA5kt45XoMnYU0P
fbtl3Ulvnv6enPlF4IBF6PYe3u9ajpMJtu/pj9jmwULjZtovjSLkmvyLa08EXH5/
+dr4nhl1qTtm82sX9KUePWu0ecQbkDSkMdn4NKTEyOf1TOuNq0lS964nbD8403pp
rKIydU5E7vG4O5llM4edQOZeTh8GkaGpEOVa8qKRooKp/N6CDcO7b2jWaBwwOKAd
lOd5NOdZokK5fIjT5NjQ25IR40v2ExY7wkk2yLiNyjXF1I+ShjJcqzUIz1eO/XLo
q1M5clzeGanY+3jCzujKzq634+rT6+TXzFF9EeyLMX82uXVv0YU5wwMbdisLesp5
63zUng+aL8lPpiqQczk9nZivm9e2duzSZevjDU4N7cNfJsVljySVtJ0usMwPU6vQ
nj0xkV6zo1a3/9JCpu35AbLBS4Zp2XMmJ06cT3YVj7zhdl+/h0JvLtqbksJy41mb
27m1UQ8Ypim17tQfLGUOlS4L7Lzzunyq+0hpggdSuly+a/+46oxoGJmiCmclrEo7
RMLmflgIZ21k/32vOusHSvMKC7IL7MKmPDk3LKl0drhUSe7czWMNtz6uRPNS4D2Z
xUzgmM5Y2XThdM20tMu6vNdp1EO0k1pfDnzxCTkzVzVh9QL5WbE0TFX6Yph1kFqQ
Wssnpf3ZNWoL1t8ZviqzTUfJqRcNON7zollAjjuFlDJmkIvOGik/j0VY3D4zZBgi
kakRqGTILjWtEONjcdjso83TLdxiwuY71rzwrdz5mMn71qbzXRRryohNG/fkNIcK
29rzGW3P+h5p1CAyJTFWUXo0ZLi+oDGg9qVqD7GX5H26SeLSIzMftWpSFlQ2zXD0
xby3rbExCCrX6wrtucfTrT+z37xFqt2rUm/3fc+zD57es3LkkTrJvtlZ5dnD86Py
RTc/XFjbGdH7he6E8gmhyWsfjPL86bSm+UNPfk+v2Vv1VPuD57rqHSLVTULp73u3
Bd/yLL3SbJGwJzhR79NRF872wTW39ihb9m2rH7WZjpwIaSpmCm6fTXYb4nwYrtNR
9Kj8btmjUcrSmx3+TOZNYencRxOZSqjL2yRe6nl/2Xb6Ks1Jp/6jz24qFhQeSKxS
CjBwFfq+rkvEguXbQVp7zTii1uiwSzvLdfsc5cvWtHztnPjOKZF83jlLyYGDydHM
gi65amuAehVvwDd/5dZbhWfWuPWr0NlpLbBckSVWtNC51H50mkXCzr3aVAvxJIjM
/32uXoi+nIZfesLXcke9l/WWhaGXOa65H/l0IOLTPgq3Qea5+0emGZ6f8XmtlWCe
u3/zm7GI0yfbQ3vi11ZncydeodpzM2X++AHLbhorupSkgxkTkc9YjxqGn62928Nv
cEn88xHz64wB+7VG2gWubtc+7U6yuewM68tdlgU2d/o0mwyFShMVqazozIvXn+yn
raoVNUQ+nDKW+Mw6Rt8nxj9EN/guVc/pcsCTu1EHsvI3Sp1xTabOuZepf8JsJqqw
7nu1SECyv9mk8Vfu78z2uQ07WXcfS3ldp9s+LsHm1OyevsPG0sQacevyq7jJy85j
V0+82lbJZ8pM85l6csp3/56E3tTBpkCHbg/zWFmJew6SowGX77OkXjvSE0bkmq+d
ujnnSovwhrHtIuKhtWmteWSJHfMGLAi49y2+r1H5RA9j5w2MdfQEirhPKT7ZFj+M
jLy+XWX/BQQjM7KR6aVkTl8PawzpUx0hJaNYOhcf6ld34FCkVMubzohHoUQert9S
z5P3hu5ubOza5vgg60lWTdykOOvDBg1JBrEO9jecthPd+rHeQb1Naw21qKuKv6pd
8DgnTcJ3Lumux63zTx+TWntcuHFnb2m1PtLPPMq8eEtg7Q6Dw6+dm4u/yp5TdeMp
I7tpmRpIovXoAbkXy7X2mOziEDNns/dHrM89jZXreVrK1+Nh9oItIbRGN9d3PNnr
a6jLRcmu17sY6O8eOiRN+vQjqbXNvddkmrTlzG+gtKO9YWS9rdNCzCVrfPKNv1y3
OPnoeo7ORqa7uy+1fdc743BXsZ+2uHC7nvOnl0FhopI1qqlMexjivu17ZOF6cJ9H
5J0665yzPSlsMZ+uv46XcfEeQFBeWvfhwJX8avf72alS49EdUuvFLGs4xg61tiN3
6zNsKD9+pEio8fDxnBtdCecjU2HObevVzjhGn/Uio72YFQm7zWCvUnJedJObaXtW
tuo3/aQEYXGzDdePEh06s85RxXkyz+v1tOHw6L0ZIx3GmBDf0HMlpbOmVvFaHW3G
Ypo0fqKFT3yup10UErnpm/LsyNd3lWwl91QT5Wx7+7qaqNKVmRmJq+1Nc9ZvK7Zk
8i9oh+1OYuMtIBrh7tusKxoxdiKLO9ehseRE+4dsesdJJR8vVdlzYr5fWxyDkBUX
skvEny0UVopY95XzPY1sNzjrUebk2hkoOK8lYC1MQ3Uzx12g0LFl7ISv7KRG3Iju
bn6e4SONhrHwVqT5sOj8tJpL6RrKZOPGvZGBHX1+gXJxSJJDJnqvw+20aB9citQy
qSfRtbe5Uxia8zjOcOxU5+7Tn+Knpa9K0Omyxw74BNe/Qh46xNLP53ZUhG2jOx1p
D3kYWZi2iaX5YaKZJy+Zw7OUlbr6yURSOJ60Pp2S9+2YsbQbfeQqxdCeZtK4LdrD
RjS37J1MzfGBGP6y/T47sySUioq4mbbW82ysMKCVaZmLm0h51m71ReQqczVLSNCm
A/LO5Err+g5X685vmailgMTuv3Kr4giTehotbSSn3Ti/sDH6fLlX2BYhE54Xplwz
jCYJMKt9TdK2CYmyqTu1A4JNlJrvda3ds/W7+p6tCyLfacl4dT9ORiA0EOsuFlnO
+KQ9ZdMKST5hICfLvyNK1VB8kvVT1ZaTay5TnCqznU3kdVXuC778UeEbb/yUoZQx
w6sZBorCnWRXDu6yJakcyGOAucwdzs0T4YcnUOv1nQq12Xn4Su5JslQWsrw7DmU3
44Xbdz24oh81ZaD3brbrfXOVyIjqs8GZEavalhCjcKszLmKZYg5R3tcfZrGUbbwu
/pavP4dR4MbpG4o3jMMn0qw4Gi40sT9mb0n1Y6HbfttyjH1Wd08097526eDc7Zct
nWVb+m5NxAzuTsngyWRle7f9ZMClxjWOsi+EdwaYWVsLpVRYhhSLruM//rTvoa74
laA9N11iE1JN98x2SnhV33p46lLY/H0bumaLwO66WYXNmkZbks/U+hmVzt7hzjx+
L01S+pN0Fq3jYJNpXSf/eVol+2zh/mF53tnx6hsDC1drM5Hnpq6HtSRYDd2S8bUf
WvP+dM2LmvLnZ77saUa8/ZS28WTfW4FOo8ZjIZdeSU+++Or0Sbkj06Y4pPfxVOy5
QqfUXTEpoywITV1bSiKvA809uQya1cWKnBVrdAs6zP0clfL2hdVkLFzaJ6tcG2eW
fNCKrVCsiFuVW+Q8f/FQz9rgfQjV524KW9ma0uLEfQoixePzLAYT+Q4dzpWRoC7U
jmvX505L769ubPrumCYuccUuoCN9/5SbhQHdg0/XdR9YfLr60lc67Fnz65snbz6r
4q6oCDXw65l7ezFd+svDqocTU+Mv6vOYSfOPx7hIHHOLKnxQmLz3jL92ghyrQNUz
Te3pfWuYPDSVLDdk6vM+KOZDzFt5Hmh+lWumWS3P+pZsU2MrfNe7+Hg7xmcBJrNy
5lY7d1oP+w5vMzwpH71WsPOtWMo1REDAp4CuXZpqR0ILn7FNyxrGSV1+47rLRuDr
g4FDeezGnjJfbAtfwE9/d57NO5qmFFy/dSTw4juLphqTWdsd+3e+veHRMaM/PyLB
Ubk1cMrvYavl9dOZO98jrlfUV4jcvLZZZGOD5ROprV+i8h6ZPJdxczHLrymm47GJ
634S2+15z6Mu0XgiesyeRaze+JmxkeB7pXvfC1sMCucPCpHuKzS1zz5lMqio7Yo4
k9z+5la/g2+MJa91oRFNJKJ977U7DSwTLuZ6h+Mvu8Q0a9WcJi29zSEZOnWTFbG5
JVOhpWYieLD6YXJ8eN3B+16XXXxDuQPuyfhVMTayfs+IQxyPtdoQ0jk0drOc7vz6
zhzBm3lVj+I/xSAiuBOvn3ieOXc5xKHb76FIskhdhfh7HW3Ntw/63klbVb8p5LSi
v8fVEW1wfVbYU7l1YejGSeWZUT+6d2rhma39dk0HeIfLtR80ZH+1cmlxr+yfjhjm
+MZQVS+xJn2NhdZ+rbzk080tbRVOTSLBdy/b1PbPXonb2VzbGNw4d2NAIpa7Je1k
3t58P0Y383ihkSNZ92SNj6fnXD/IE2/54uWceZ37FTm5C4rmnp9k0iuDpl53lrmS
U3bPqcQ/oC4qCLmq0KwYwrrT3YLpnij/vFBMu+9RYkfDhlNrEkSDdhRGHizdxCvD
WfNg546y6r0edy4S3bjNJCnAZElLo4Q4n3f31Yv6m2KneMVS66zz2vNSZDIVdCNp
YWkntEtlfVKZ3OT4hb83wIbhA/S6atsGExkUDuhOM5TCPjpDapF5qv48E0z6Buni
jm4PX+9NDny4QV7AXK2is9osMrU0d8d5575zty16NPeW5q6NHY9xvpqENHPbk1CV
p3+UhT4i74pJwHod1WZyR+0yfZpQ6YWDIW+UujLnvl1HNH15vcVv1EigrbMvDVnX
1qEn4u7u4G5bR0ynGPaNU2xD7sMz3HT7w+u7x9viM0ea7tQJ1cezlReJztZZDp8T
E7+jjkAiJfkLDRn67YwNBgs3FyYYyNWW1F/tloyjOZ0v/TJ1s23hVn+SEaFjVR99
295Ok8keYtukH0XLaFJWrDXDmtlmoiT3aXLtle8Os1VaOuRBEcrNXFZrm6Oknc7K
n5L+ojRBMyMhG/Kq0W+o4eT7veNe9bfUaK50aN5kTODqPX2rqbKHbzDPIr78QZ+r
+7X9e5+N1R1uaBG3EAr1c+RJgzut3cAfmZtx6/PRjaavpiguWB3RRKhn29K9n904
9SFBsSk5iUXMstx4kCl217YuiEXqiv2HrD2zKTNvL0bMz+jcDI6/y6uV4MbS08t4
mv5tkOsnskO7EHam0183TvOkE/PuvO03ZDH5PZeU1o88dzTLsz7zBV3T7NTBoq+O
/n30Rl+HG+hmmnftvzd732J82x6B/tjsnoGjHNsfpyftD5QKerqNNi1qPOO5uctF
pGeg20Str4HeJz2jb0WDUeHDrxpz9gSfrXwMn0t69ajp/sN2dsmvXwfCLhfuunA9
+sVF2fymAz0H06q/GLgk1Hr2OWyWc1QW2NemIEjXzIZwEbEK3jKQINxmMx0QrvGi
e5SliixB40NP3V3u/cNJgaL7P0n0s9srhNiVuo3s8+8O6NXcer2vcvLVu1HXkXND
Z07wJtcne1WIyH6JlEzrmrp3f5Du/V3oxeF4g1uds7wpJ8ICmhyQsf4bxqRG86m0
TwZcu9bP5ZTu7lh76r1kUVP1Q4X+pua8OQFkxp2Ij2mVSnmH9QNNCkr6t2Tuy2S/
uXHfDfsr9pcGo9UDu/jvbhlIlJCdT93LHMTYV1oolnb0+9pA9rc1UtX1N29NHT+h
3fS0UCcukNjwi3711Q+q9+LpWK+92qyt1RHHHGBf2Z7mzXZVtcXunt3hEau2Hgb5
hVIJJ9RMf/Psnrbd38ZYmo14FiKVzO++72mtN54/IX6xpe1oXN2EYNCoUv3+x2Gx
74URLFnvDCdk9rJcmRf8vGfUr/Gj2nfJxnV6Z4YnmsLYEzYcP0XbzFVQjPD1GTjX
[truncated: 103,690 more chars]
