# Supplementary material for: CD8+ T cell self-tolerance permits responsiveness but limits tissue damage
Source: eLife journal article supplement (doi:10.7554/elife.65615), 2021-04-30
Supplement: fig4-data1 [file elife-65615-fig4-data1-v2.pzfx]

<?xml version="1.0" encoding="UTF-8"?><GraphPadPrismFile PrismXMLVersion="5.00">
<Created>
<OriginalVersion CreatedByProgram="GraphPad Prism" CreatedByVersion="9.1.0.216" Login="emilytruckenbrod" DateTime="2021-04-29T14:02:23-05:00"></OriginalVersion>
<MostRecentVersion CreatedByProgram="GraphPad Prism" CreatedByVersion="9.1.0.216" Login="emilytruckenbrod" DateTime="2021-04-29T14:38:37-05:00"></MostRecentVersion>
</Created>
<InfoSequence>
<Ref ID="Info0"></Ref>
<Ref ID="Info1"></Ref>
<Ref ID="Info2"></Ref>
<Ref ID="Info3"></Ref>
<Ref ID="Info4"></Ref>
<Ref ID="Info5"></Ref>
<Ref ID="Info6" Selected="1"></Ref>
</InfoSequence>
<TableSequence Selected="1">
<Ref ID="Table0"></Ref>
<Ref ID="Table4"></Ref>
<Ref ID="Table5"></Ref>
<Ref ID="Table10"></Ref>
<Ref ID="Table13"></Ref>
<Ref ID="Table14"></Ref>
<Ref ID="Table17"></Ref>
<Ref ID="Table20"></Ref>
<Ref ID="Table23" Selected="1"></Ref>
</TableSequence>
<Table ID="Table0" XFormat="none" TableType="OneWay" EVFormat="AsteriskAfterNumber">
<Title>Compiled no. Trp2/Kb tetramer+ time course_no Day 1+d4_d6_d3 updates</Title>
<Info ID="Info0">
<Title>Compiled no. Trp2/Kb tetramer+ time course_no Day 1+d4_d6_d3 updates</Title>
<Notes>
<Font Color="#222222" Face="Courier New">o	</Font>
<Font Color="#222222" Face="Times New Roman">Day 2 <BR></BR></Font>
<Font Color="#222222" Face="Courier New">o	</Font>
<Font Color="#222222" Face="Times New Roman">11/19/18</Font>

<Font Color="#000000" Face="Wingdings"><BR></BR>§</Font>

<Font Color="#000000" Face="Times New Roman">	C 923-5 (female, 9/1/18)<BR></BR></Font>
<Font Color="#000000" Face="Wingdings">§</Font>

<Font Color="#000000" Face="Times New Roman">	B6 (female, 8/13/18)<BR></BR></Font>
<Font Color="#222222" Face="Courier New">o	</Font>
<Font Color="#222222" Face="Times New Roman">1/5/19<BR></BR></Font>
<Font Color="#000000" Face="Wingdings">§</Font>

<Font Color="#000000" Face="Times New Roman">	WT: B6.SJL, n = 4, female, DOB 10/8/18 (eliminated 1)<BR></BR></Font>
<Font Color="#000000" Face="Wingdings">§</Font>

<Font Color="#000000" Face="Times New Roman">	Trp2 KOs: EEE 950-2, male, DOB 10/13/18<BR></BR></Font>
<Font Color="#000000" Face="Courier New">o	</Font>
<Font Color="#000000" Face="Times New Roman">Day 3<BR></BR></Font>
<Font Color="#000000" Face="Courier New">o	</Font>
<Font Color="#000000" Face="Times New Roman">9/10/18<BR></BR></Font>
<Font Color="#000000" Face="Wingdings">§</Font>

<Font Color="#000000" Face="Times New Roman">	B6 4, 5 = 2, female, 7/918 <BR></BR></Font>
<Font Color="#000000" Face="Wingdings">§</Font>

<Font Color="#000000" Face="Times New Roman">	C 740-1: female, DOB 7/5/18<BR></BR></Font>
<Font Color="#000000" Face="Courier New">o	</Font>
<Font Color="#000000" Face="Times New Roman">9/21/18<BR></BR></Font>
<Font Color="#000000" Face="Wingdings">§</Font>

<Font Color="#000000" Face="Times New Roman">	B6, n = 2, female, 7/30/18 (WT 4, 5)<BR></BR></Font>
<Font Color="#000000" Face="Symbol">·	</Font>
<Font Color="#000000" Face="Times New Roman">Had to add some of Trp2 peptide to TriVax (less than 25%)<BR></BR></Font>
<Font Color="#000000" Face="Wingdings">§</Font>

<Font Color="#000000" Face="Times New Roman">	EEE 116, 117 (female, 7/23)<BR></BR></Font>
<Font Color="#000000" Face="Symbol">·	</Font>
<Font Color="#000000" Face="Times New Roman">116: some may have gone perivascular<BR></BR></Font>
<Font Color="#000000" Face="Symbol">·	</Font>
<Font Color="#000000" Face="Times New Roman">117: gave TriVax ip<BR></BR></Font>
<Font Color="#000000" Face="Courier New">o	</Font>
<Font Color="#000000" Face="Times New Roman">1/29/19<BR></BR></Font>
<Font Color="#000000" Face="Wingdings">§</Font>

<Font Color="#000000" Face="Times New Roman">	WT<BR></BR></Font>
<Font Color="#000000" Face="Symbol">·	</Font>
<Font Color="#000000" Face="Times New Roman">All female, 2 B6 and 2 B6.SJL (DOB 11/5/18)<BR></BR></Font>
<Font Color="#000000" Face="Symbol">·	</Font>
<Font Color="#000000" Face="Times New Roman">1 B6.SJL = na</Font>
<Font Color="#000000" Face="Times New Roman">ï</Font>
<Font Color="#000000" Face="Times New Roman">ve<BR></BR></Font>
<Font Color="#000000" Face="Wingdings">§</Font>

<Font Color="#000000" Face="Times New Roman">	KO<BR></BR></Font>
<Font Color="#000000" Face="Symbol">·	</Font>
<Font Color="#000000" Face="Times New Roman">C 965-7, female (DOB 10/26/18)<BR></BR></Font>
<Font Color="#000000" Face="Courier New">o	</Font>
<Font Color="#000000" Face="Times New Roman">2/10/20<BR></BR></Font>
<Font Color="#000000" Face="Wingdings">§</Font>

<Font Color="#000000" Face="Times New Roman">	C 695-698: female, 12/26/19<BR></BR></Font>
<Font Color="#000000" Face="Symbol">·	</Font>
<Font Color="#000000" Face="Times New Roman">C696 = difficult injection, ~ 50 uL perivascular?<BR></BR></Font>
<Font Color="#000000" Face="Wingdings">§</Font>

<Font Color="#000000" Face="Times New Roman">	WT (n = 4 plus 1 na</Font>
<Font Color="#000000" Face="Times New Roman">ï</Font>
<Font Color="#000000" Face="Times New Roman">ve), 12/23/19<BR></BR></Font>
<Font Color="#000000" Face="Courier New">o	</Font>
<Font Color="#000000" Face="Times New Roman">Day 4<BR></BR></Font>
<Font Color="#000000" Face="Courier New">o	</Font>
<Font Color="#000000" Face="Times New Roman">11/2/18<BR></BR></Font>
<Font Color="#000000" Face="Wingdings">§</Font>

<Font Color="#000000" Face="Times New Roman">	DCT -/- (male, DOB 8/1/18) C 857, 858, <BR></BR></Font>
<Font Color="#000000" Face="Wingdings">§</Font>

<Font Color="#000000" Face="Times New Roman">	DCT -/- (male, DOB  8/2/18) 864<BR></BR></Font>
<Font Color="#000000" Face="Wingdings">§</Font>

<Font Color="#000000" Face="Times New Roman">	DCT +/- (male, DOB 8/2/18) C 861-3<BR></BR></Font>
<Font Color="#000000" Face="Courier New">o	</Font>
<Font Color="#000000" Face="Times New Roman">6/11/19<BR></BR></Font>
<Font Color="#000000" Face="Wingdings">§</Font>

<Font Color="#000000" Face="Times New Roman">	DCT KO<BR></BR></Font>
<Font Color="#000000" Face="Symbol">·	</Font>
<Font Color="#000000" Face="Times New Roman">C 197-8: male, 4/4/19<BR></BR></Font>
<Font Color="#000000" Face="Symbol">·	</Font>
<Font Color="#000000" Face="Times New Roman">C 002-004, female, 4/4/19<BR></BR></Font>
<Font Color="#000000" Face="Wingdings">§</Font>

<Font Color="#000000" Face="Times New Roman">	WT females, n = 4, DOB 4/15/19<BR></BR></Font>
<Font Color="#000000" Face="Courier New">o	</Font>
<Font Color="#000000" Face="Times New Roman">1/13/20<BR></BR></Font>
<Font Color="#000000" Face="Wingdings">§</Font>

<Font Color="#000000" Face="Times New Roman">	DCT KO, female, DOB 11/4/19<BR></BR></Font>
<Font Color="#000000" Face="Symbol">·	</Font>
<Font Color="#000000" Face="Times New Roman">C 666 = na</Font>
<Font Color="#000000" Face="Times New Roman">ï</Font>
<Font Color="#000000" Face="Times New Roman">ve<BR></BR></Font>
<Font Color="#000000" Face="Wingdings">§</Font>

<Font Color="#000000" Face="Times New Roman">	C 667-9 <BR></BR></Font>
<Font Color="#000000" Face="Symbol">·	</Font>
<Font Color="#000000" Face="Times New Roman">B6.SJL females, n = 4, DOB 10/28/19<BR></BR></Font>
<Font Color="#000000" Face="Courier New">o	</Font>
<Font Color="#000000" Face="Times New Roman">Day 5<BR></BR></Font>
<Font Color="#000000" Face="Courier New">o	</Font>
<Font Color="#000000" Face="Times New Roman">3/25/19<BR></BR></Font>
<Font Color="#000000" Face="Wingdings">§</Font>

<Font Color="#000000" Face="Times New Roman">	DCT -/-<BR></BR></Font>
<Font Color="#000000" Face="Symbol">·	</Font>
<Font Color="#000000" Face="Times New Roman">C 104, 106, 1 (male, 1/2/19)<BR></BR></Font>
<Font Color="#000000" Face="Symbol">·	</Font>
<Font Color="#000000" Face="Times New Roman">C 107, 109 (female, 1/2/19)<BR></BR></Font>
<Font Color="#000000" Face="Symbol">·	</Font>
<Font Color="#000000" Face="Times New Roman">C 129, 131 (male, 1/30/19)<BR></BR></Font>
<Font Color="#000000" Face="Wingdings">§</Font>

<Font Color="#000000" Face="Times New Roman">	DCT +/-<BR></BR></Font>
<Font Color="#000000" Face="Symbol">·	</Font>
<Font Color="#000000" Face="Times New Roman">C 105 (male, 1/2/19)<BR></BR></Font>
<Font Color="#000000" Face="Symbol">·	</Font>
<Font Color="#000000" Face="Times New Roman">C 108 (female, 1/2/19)<BR></BR></Font>
<Font Color="#000000" Face="Symbol">·	</Font>
<Font Color="#000000" Face="Times New Roman">C 130, 132 (male, 1/30/19)<BR></BR></Font>
<Font Color="#000000" Face="Courier New">o	</Font>
<Font Color="#000000" Face="Times New Roman">5/19/19<BR></BR></Font>
<Font Color="#000000" Face="Wingdings">§</Font>

<Font Color="#000000" Face="Times New Roman">	DCT KO<BR></BR></Font>
<Font Color="#000000" Face="Symbol">·	</Font>
<Font Color="#000000" Face="Times New Roman">C 166, 167, male, DOB 3/23<BR></BR></Font>
<Font Color="#000000" Face="Symbol">·	</Font>
<Font Color="#000000" Face="Times New Roman">C 179, 180, female, DOB 3/21<BR></BR></Font>
<Font Color="#000000" Face="Wingdings">§</Font>

<Font Color="#000000" Face="Times New Roman">	WT females, n = 4, DOB 3/11<BR></BR></Font>
<Font Color="#000000" Face="Courier New">o	</Font>
<Font Color="#000000" Face="Times New Roman">Day 6<BR></BR></Font>
<Font Color="#000000" Face="Courier New">o	</Font>
<Font Color="#000000" Face="Times New Roman">4/11/19<BR></BR></Font>
<Font Color="#000000" Face="Wingdings">§</Font>

<Font Color="#000000" Face="Times New Roman">	DCT -/-<BR></BR></Font>
<Font Color="#000000" Face="Symbol">·	</Font>
<Font Color="#000000" Face="Times New Roman">C 133 (male, 1/30)<BR></BR></Font>
<Font Color="#000000" Face="Symbol">·	</Font>
<Font Color="#000000" Face="Times New Roman">C 139 (male, 2/18)<BR></BR></Font>
<Font Color="#000000" Face="Symbol">·	</Font>
<Font Color="#000000" Face="Times New Roman">C 141 (female, 2/18)<BR></BR></Font>
<Font Color="#000000" Face="Wingdings">§</Font>

<Font Color="#000000" Face="Times New Roman">	DCT +/-<BR></BR></Font>
<Font Color="#000000" Face="Symbol">·	</Font>
<Font Color="#000000" Face="Times New Roman">C 135 (initially ~ 50 uL pv, gave 200 uL IV), 136 (female, 1/30)<BR></BR></Font>
<Font Color="#000000" Face="Symbol">·	</Font>
<Font Color="#000000" Face="Times New Roman">C 137, 138 (male, 2/18)<BR></BR></Font>
<Font Color="#000000" Face="Courier New">o	</Font>
<Font Color="#000000" Face="Times New Roman">1/31/20<BR></BR></Font>
<Font Color="#000000" Face="Wingdings">§</Font>

<Font Color="#000000" Face="Times New Roman">	DCT KO, DOB 12/12/19<BR></BR></Font>
<Font Color="#000000" Face="Symbol">·	</Font>
<Font Color="#000000" Face="Times New Roman">C-4C-682-5, male, <BR></BR></Font>
<Font Color="#000000" Face="Courier New">o	</Font>
<Font Color="#000000" Face="Times New Roman">682, 684 = TriVax<BR></BR></Font>
<Font Color="#000000" Face="Courier New">o	</Font>
<Font Color="#000000" Face="Times New Roman">685 = Na</Font>
<Font Color="#000000" Face="Times New Roman">ï</Font>
<Font Color="#000000" Face="Times New Roman">ve <BR></BR></Font>
<Font Color="#000000" Face="Symbol">·	</Font>
<Font Color="#000000" Face="Times New Roman">C-4C-686-8, female<BR></BR></Font>
<Font Color="#000000" Face="Wingdings">§</Font>

<Font Color="#000000" Face="Times New Roman">	DCT +/-, female, DOB 12/12/19<BR></BR></Font>
<Font Color="#000000" Face="Symbol">·	</Font>
<Font Color="#000000" Face="Times New Roman">C-4C-689, 690, female<BR></BR></Font>
<Font Color="#000000" Face="Wingdings">§</Font>

<Font Color="#000000" Face="Times New Roman">	B6 females, n = 2, DOB 12/2/19<BR></BR></Font>
<Font Color="#000000" Face="Courier New">o	</Font>
<Font Color="#000000" Face="Times New Roman">Day 7 (200 ug peptide as with other days)<BR></BR></Font>
<Font Color="#000000" Face="Courier New">o	</Font>
<Font Color="#000000" Face="Times New Roman">3/8/19<BR></BR></Font>
<Font Color="#000000" Face="Wingdings">§</Font>

<Font Color="#000000" Face="Times New Roman">	B6 females, DOB 12/31/18<BR></BR></Font>
<Font Color="#000000" Face="Symbol">·	</Font>
<Font Color="#000000" Face="Times New Roman">N = 5 tx with TriVax<BR></BR></Font>
<Font Color="#000000" Face="Wingdings">§</Font>

<Font Color="#000000" Face="Times New Roman">	Trp2 KOs<BR></BR></Font>
<Font Color="#000000" Face="Symbol">·	</Font>
<Font Color="#000000" Face="Times New Roman">C 100- through 103-, male, DOB 12/20/18<BR></BR></Font>
</Notes>
<Constant><Name>Experiment Date</Name><Value>2021-04-29</Value></Constant>
<Constant><Name>Experiment ID</Name><Value></Value></Constant>
<Constant><Name>Notebook ID</Name><Value></Value></Constant>
<Constant><Name>Project</Name><Value></Value></Constant>
<Constant><Name>Experimenter</Name><Value></Value></Constant>
<Constant><Name>Protocol</Name><Value></Value></Constant>
</Info>

<RowTitlesColumn Width="81">
<Subcolumn></Subcolumn>
</RowTitlesColumn>
<YColumn Width="81" Decimals="0" Subcolumns="1">
<Title><TextAlign align="Center">WT 2d</TextAlign></Title>
<Subcolumn>
<d>674</d>
<d>520</d>
<d>614</d>
<d></d>
<d>1185</d>
<d></d>
<d>966</d>
<d>805</d>
</Subcolumn>
</YColumn>
<YColumn Width="81" Decimals="0" Subcolumns="1">
<Title><TextAlign align="Center">Trp2 KO 2d</TextAlign></Title>
<Subcolumn>
<d>559</d>
<d>298</d>
<d>498</d>
<d></d>
<d>493</d>
<d>587</d>
<d>442</d>
</Subcolumn>
</YColumn>
<YColumn Width="81" Decimals="0" Subcolumns="1">
<Title><TextAlign align="Center">WT 3d</TextAlign></Title>
<Subcolumn>
<d>5287</d>
<d>6490</d>
<d></d>
<d></d>
<d>5186</d>
<d>6195</d>
<d></d>
<d>11140</d>
<d>8855</d>
<d>7583</d>
<d></d>
<d>5543</d>
<d>7002</d>
<d>6051</d>
<d>4151</d>
</Subcolumn>
</YColumn>
<YColumn Width="81" Decimals="0" Subcolumns="1">
<Title><TextAlign align="Center">Trp2 KO 3d</TextAlign></Title>
<Subcolumn>
<d>5175</d>
<d>5963</d>
<d></d>
<d></d>
<d>9162</d>
<d>18095</d>
<d></d>
<d>14464</d>
<d>12858</d>
<d>12002</d>
<d></d>
<d>9695</d>
<d>7955</d>
<d>10326</d>
<d>8481</d>
</Subcolumn>
</YColumn>
<YColumn Width="81" Decimals="0" Subcolumns="1">
<Title><TextAlign align="Center">WT 4d</TextAlign></Title>
<Subcolumn>
<d>207980</d>
<d>76661</d>
<d></d>
<d></d>
<d>358793</d>
<d>261174</d>
<d>432660</d>
<d>82289</d>
<d></d>
<d></d>
<d>170171</d>
<d>82339</d>
<d>115158</d>
<d>132434</d>
</Subcolumn>
</YColumn>
<YColumn Width="81" Decimals="0" Subcolumns="1">
<Title><TextAlign align="Center">Trp2 KO 4d</TextAlign></Title>
<Subcolumn>
<d>188144</d>
<d>419345</d>
<d></d>
<d></d>
<d>917134</d>
<d>673496</d>
<d>779763</d>
<d>330342</d>
<d>301932</d>
<d></d>
<d>703045</d>
<d>500062</d>
<d>504003</d>
</Subcolumn>
</YColumn>
<YColumn Width="81" Decimals="6" Subcolumns="1">
<Title><TextAlign align="Center">WT 5d</TextAlign></Title>
<Subcolumn>
<d>1132008</d>
<d>2264659</d>
<d>1021754</d>
<d>1038263</d>
<d></d>
<d>1050870</d>
<d>443382</d>
<d>974250</d>
<d>411135</d>
</Subcolumn>
</YColumn>
<YColumn Width="81" Decimals="6" Subcolumns="1">
<Title><TextAlign align="Center">Trp2 KO 5d</TextAlign></Title>
<Subcolumn>
<d>1048149</d>
<d>1552357</d>
<d>1657942</d>
<d></d>
<d></d>
<d>4274728</d>
<d>1522962</d>
<d>3266643</d>
<d>2581968</d>
</Subcolumn>
</YColumn>
<YColumn Width="81" Decimals="6" Subcolumns="1">
<Title><TextAlign align="Center">WT 6d</TextAlign></Title>
<Subcolumn>
<d>1043158</d>
<d>2417579</d>
<d>3258390</d>
<d>1123752</d>
<d></d>
<d>2131132</d>
<d>2588327</d>
<d>2748297</d>
<d>1358810</d>
</Subcolumn>
</YColumn>
<YColumn Width="81" Decimals="7" Subcolumns="1">
<Title><TextAlign align="Center">Trp2 KO 6d</TextAlign></Title>
<Subcolumn>
<d>7462347</d>
<d>8662420</d>
<d>8844167</d>
<d></d>
<d></d>
<d>1.1068457e+007</d>
<d>1.0120709e+007</d>
<d>9659033</d>
<d>4699337</d>
<d>6520786</d>
</Subcolumn>
</YColumn>
<YColumn Width="81" Decimals="6" Subcolumns="1">
<Title><TextAlign align="Center">WT 7d</TextAlign></Title>
<Subcolumn>
<d>2986244</d>
<d>2251783</d>
<d>2395101</d>
<d>3416410</d>
<d>1859379</d>
</Subcolumn>
</YColumn>
<YColumn Width="81" Decimals="7" Subcolumns="1">
<Title><TextAlign align="Center">Trp2 KO 7d</TextAlign></Title>
<Subcolumn>
<d>4883948</d>
<d>1.7414465e+007</d>
<d>7443040</d>
<d>1.1381881e+007</d>
</Subcolumn>
</YColumn>
</Table>
<Table ID="Table4" XFormat="none" TableType="OneWay" EVFormat="AsteriskAfterNumber">
<Title>Compiled % CD25hi</Title>
<Info ID="Info1">
<Title>Compiled % CD25hi</Title>
<Notes>
<Font Color="#222222" Face="Times New Roman">Day 2-4 experimentts from compiled no. figure</Font>
</Notes>
<Constant><Name>Experiment Date</Name><Value>2021-04-29</Value></Constant>
<Constant><Name>Experiment ID</Name><Value></Value></Constant>
<Constant><Name>Notebook ID</Name><Value></Value></Constant>
<Constant><Name>Project</Name><Value></Value></Constant>
<Constant><Name>Experimenter</Name><Value></Value></Constant>
<Constant><Name>Protocol</Name><Value></Value></Constant>
</Info>

<RowTitlesColumn Width="84">
<Subcolumn></Subcolumn>
</RowTitlesColumn>
<YColumn Width="81" Decimals="1" Subcolumns="1">
<Title>WT 2d</Title>
<Subcolumn>
<d>19.1</d>
<d>16.9</d>
<d>11.1</d>
<d></d>
<d>24.3</d>
<d></d>
<d>24.6</d>
<d>23</d>
</Subcolumn>
</YColumn>
<YColumn Width="81" Decimals="1" Subcolumns="1">
<Title><I>Dct</I><SUP>-/-</SUP> 2d</Title>
<Subcolumn>
<d>33.2</d>
<d>26.3</d>
<d>34.7</d>
<d></d>
<d>29.9</d>
<d>27</d>
<d>23.1</d>
</Subcolumn>
</YColumn>
<YColumn Width="81" Decimals="2" Subcolumns="1">
<Title><TextAlign align="Center">WT 3d</TextAlign></Title>
<Subcolumn>
<d>10.3</d>
<d>7.46</d>
<d></d>
<d>7.39</d>
<d>8.24</d>
<d></d>
<d>18.1</d>
<d>13.6</d>
<d>18.3</d>
<d>15</d>
</Subcolumn>
</YColumn>
<YColumn Width="81" Decimals="1" Subcolumns="1">
<Title><I>Dct</I><SUP>-/-</SUP> 3d</Title>
<Subcolumn>
<d>17.3</d>
<d>14.4</d>
<d></d>
<d>11.5</d>
<d>11.8</d>
<d></d>
<d>29.2</d>
<d>32.8</d>
<d>31.6</d>
<d>31.7</d>
</Subcolumn>
</YColumn>
<YColumn Width="81" Decimals="1" Subcolumns="1">
<Title><TextAlign align="Center">WT 4d</TextAlign></Title>
<Subcolumn>
<d>26.6</d>
<d>28.4</d>
<d>34.7</d>
<d></d>
<d>38.1</d>
<d>25.9</d>
<d>3.44</d>
<d>16.7</d>
<d></d>
<d></d>
<d>20.4</d>
<d>17.1</d>
<d>13.7</d>
<d>16.1</d>
</Subcolumn>
</YColumn>
<YColumn Width="81" Decimals="1" Subcolumns="1">
<Title><I>Dct</I><SUP>-/-</SUP> 4d</Title>
<Subcolumn>
<d>53</d>
<d>59.8</d>
<d>48.3</d>
<d></d>
<d>39.8</d>
<d>35.4</d>
<d>32.6</d>
<d>56.5</d>
<d>46.7</d>
<d></d>
<d>32.6</d>
<d>36</d>
<d>35.5</d>
</Subcolumn>
</YColumn>
</Table>
<Table ID="Table5" XFormat="none" TableType="OneWay" EVFormat="AsteriskAfterNumber">
<Title>Day 4 CD25 MFI (CD25+ Trp2+)</Title>
<Info ID="Info2">
<Title>Day 4 CD25 MFI (CD25+ Trp2+)</Title>
<Notes>
<Font Color="#000000" Face="Helvetica">2019 and 2020 experiments for day 4<BR></BR></Font>
</Notes>
<Constant><Name>Experiment Date</Name><Value>2021-04-29</Value></Constant>
<Constant><Name>Experiment ID</Name><Value></Value></Constant>
<Constant><Name>Notebook ID</Name><Value></Value></Constant>
<Constant><Name>Project</Name><Value></Value></Constant>
<Constant><Name>Experimenter</Name><Value></Value></Constant>
<Constant><Name>Protocol</Name><Value></Value></Constant>
</Info>

<RowTitlesColumn Width="84">
<Subcolumn></Subcolumn>
</RowTitlesColumn>
<YColumn Width="81" Decimals="2" Subcolumns="1">
<Title>WT 4d</Title>
<Subcolumn>
<d>2240</d>
<d>2438</d>
<d>2099</d>
<d>2319</d>
<d></d>
<d>2534</d>
<d>2185</d>
<d>1340</d>
<d>2136</d>
</Subcolumn>
</YColumn>
<YColumn Width="81" Decimals="1" Subcolumns="1">
<Title><I>Dct</I><SUP><I>-/-</I></SUP> 4d</Title>
<Subcolumn>
<d>3052</d>
<d>3325</d>
<d>2963</d>
<d></d>
<d></d>
<d>2826</d>
<d>2676</d>
<d>2391</d>
<d>4108</d>
<d>3234</d>
</Subcolumn>
</YColumn>
</Table>
<Table ID="Table10" XFormat="none" TableType="OneWay" EVFormat="AsteriskAfterNumber">
<Title>PE Trp2 tetramer MFI (Trp2+)_day 4</Title>
<Info ID="Info3">
<Title>PE Trp2 tetramer MFI (Trp2+)_day 4</Title>
<Notes></Notes>
<Constant><Name>Experiment Date</Name><Value>2019-06-11</Value></Constant>
<Constant><Name>Experiment ID</Name><Value></Value></Constant>
<Constant><Name>Notebook ID</Name><Value></Value></Constant>
<Constant><Name>Project</Name><Value></Value></Constant>
<Constant><Name>Experimenter</Name><Value></Value></Constant>
<Constant><Name>Protocol</Name><Value></Value></Constant>
</Info>

<RowTitlesColumn Width="84">
<Subcolumn></Subcolumn>
</RowTitlesColumn>
<YColumn Width="81" Decimals="2" Subcolumns="1">
<Title>WT </Title>
<Subcolumn>
<d>2450</d>
<d>1650</d>
<d>1293</d>
<d>1308</d>
</Subcolumn>
</YColumn>
<YColumn Width="81" Decimals="1" Subcolumns="1">
<Title>Dct<SUP>-/-</SUP></Title>
<Subcolumn>
<d>2713</d>
<d>2514</d>
<d>2304</d>
<d>2707</d>
<d>2432</d>
</Subcolumn>
</YColumn>
<YColumn Width="81" Decimals="0" Subcolumns="1">
<Title>WT CD25+</Title>
<Subcolumn>
<d>3545</d>
<d>2674</d>
<d>2426</d>
<d>2461</d>
</Subcolumn>
</YColumn>
<YColumn Width="85" Decimals="0" Subcolumns="1">
<Title>Dct<SUP>-/-</SUP> CD25+</Title>
<Subcolumn>
<d>4036</d>
<d>3824</d>
<d>3741</d>
<d>3890</d>
<d>3741</d>
</Subcolumn>
</YColumn>
<YColumn Width="81" Decimals="0" Subcolumns="1">
<Title>WT CD25-</Title>
<Subcolumn>
<d>1825</d>
<d>1389</d>
<d>1262</d>
<d>1165</d>
</Subcolumn>
</YColumn>
<YColumn Width="82" Decimals="0" Subcolumns="1">
<Title>Dct<SUP>-/-</SUP> CD25-</Title>
<Subcolumn>
<d>1974</d>
<d>1934</d>
<d>1771</d>
<d>1566</d>
<d>1639</d>
</Subcolumn>
</YColumn>
</Table>
<Table ID="Table13" XFormat="none" TableType="OneWay" EVFormat="AsteriskAfterNumber">
<Title>WT:KO PE tetramer MFI ratio time course</Title>
<Info ID="Info4">
<Title>WT:KO PE tetramer MFI ratio time course</Title>
<Notes>
<Font Color="#222222" Face="Courier New">o	</Font>
<Font Color="#222222" Face="Times New Roman">Experiments included in acute time course above, plus additional day 7 experiments with 50 ug Trp2<BR></BR>Each dot indicates one experiment (avg. WT MFI/avg. KO MFI)<BR></BR></Font>
</Notes>
<Constant><Name>Experiment Date</Name><Value>2021-04-29</Value></Constant>
<Constant><Name>Experiment ID</Name><Value></Value></Constant>
<Constant><Name>Notebook ID</Name><Value></Value></Constant>
<Constant><Name>Project</Name><Value></Value></Constant>
<Constant><Name>Experimenter</Name><Value></Value></Constant>
<Constant><Name>Protocol</Name><Value></Value></Constant>
</Info>

<RowTitlesColumn Width="84">
<Subcolumn></Subcolumn>
</RowTitlesColumn>
<YColumn Width="84" Decimals="9" Subcolumns="1">
<Title>Pre-immune</Title>
<Subcolumn>
<d>0.85056391</d>
<d>0.748930569</d>
<d>0.82859486</d>
</Subcolumn>
</YColumn>
<YColumn Width="81" Decimals="8" Subcolumns="1">
<Title>Day 2</Title>
<Subcolumn>
<d>0.7416895</d>
<d>0.89066623</d>
</Subcolumn>
</YColumn>
<YColumn Width="81" Decimals="7" Subcolumns="1">
<Title>Day 3</Title>
<Subcolumn>
<d>0.9840039</d>
<d>0.7844674</d>
<d>0.7191601</d>
<d>0.8252403</d>
</Subcolumn>
</YColumn>
<YColumn Width="81" Decimals="8" Subcolumns="1">
<Title>Day 4</Title>
<Subcolumn>
<d>0.7842621</d>
<d>0.66110892</d>
<d>0.64887409</d>
</Subcolumn>
</YColumn>
<YColumn Width="81" Decimals="8" Subcolumns="1">
<Title>Day 5</Title>
<Subcolumn>
<d>0.7221639</d>
<d>0.65731363</d>
</Subcolumn>
</YColumn>
<YColumn Width="81" Decimals="8" Subcolumns="1">
<Title>Day 6</Title>
<Subcolumn>
<d>0.7400568</d>
<d>0.53976035</d>
</Subcolumn>
</YColumn>
<YColumn Width="81" Decimals="8" Subcolumns="1">
<Title>Day 7</Title>
<Subcolumn>
<d>0.78480775</d>
<d></d>
<d>0.84785234</d>
<d></d>
<d></d>
<d></d>
<d></d>
<d></d>
<d>0.78972253</d>
<d></d>
<d>0.61045109</d>
<d></d>
<d>0.814</d>
<d></d>
<d>0.56829119</d>
</Subcolumn>
</YColumn>
</Table>
<Table ID="Table14" XFormat="none" TableType="OneWay" EVFormat="AsteriskAfterNumber">
<Title>PE-Cy7 tet MFI (B8R+)_no IL2C</Title>
<Info ID="Info5">
<Title>PE-Cy7 tet MFI (B8R+)_no IL2C</Title>
<Notes>
<Font Color="#000000" Face="Helvetica">Only mice not treated with IL2C (These were PBS controls)</Font>
</Notes>
<Constant><Name>Experiment Date</Name><Value>2019-05-06</Value></Constant>
<Constant><Name>Experiment ID</Name><Value></Value></Constant>
<Constant><Name>Notebook ID</Name><Value></Value></Constant>
<Constant><Name>Project</Name><Value></Value></Constant>
<Constant><Name>Experimenter</Name><Value></Value></Constant>
<Constant><Name>Protocol</Name><Value></Value></Constant>
</Info>

<RowTitlesColumn Width="84">
<Subcolumn></Subcolumn>
</RowTitlesColumn>
<YColumn Width="81" Decimals="2" Subcolumns="1">
<Title>WT</Title>
<Subcolumn>
<d>3831</d>
<d>3561</d>
<d>3792</d>
</Subcolumn>
</YColumn>
<YColumn Width="81" Decimals="1" Subcolumns="1">
<Title><I>Dct</I><SUP><I>-/-</I></SUP></Title>
<Subcolumn>
<d>3305</d>
<d>3785</d>
<d>3518</d>
</Subcolumn>
</YColumn>
</Table>
<Table ID="Table17" XFormat="none" TableType="OneWay" EVFormat="AsteriskAfterNumber">
<Title>Compiled no. Trp2+ after peptide stimulation</Title>
<Info ID="Info6">
<Title>Compiled no. Trp2+ after peptide stimulation</Title>
<Notes>
<Font Color="#222222" Face="Symbol">·	</Font>
<Font Color="#222222" Face="Times New Roman">1 day: 7/12/18 (3 WT, 3 KO; all female), 7/19/18 (4 WT, 4 KO; all female), 7/24/18 (3 WT females, 3 KO males; enumeration/phenotype from half of sample; 7/26/18 (3 WT, 3 KO; all female) <BR></BR></Font>
<Font Color="#222222" Face="Symbol">·	</Font>
<Font Color="#222222" Face="Times New Roman">2 days: 8/14/18 (3 WT </Font>
<Font Color="#222222" Face="Times New Roman">–</Font>
<Font Color="#222222" Face="Times New Roman"> 2 female, 1 male het, 3 KO males), 8/31/18 (3 WT, 3 KOs; all female)<BR></BR></Font>
<Font Color="#222222" Face="Symbol">·	</Font>
<Font Color="#222222" Face="Times New Roman">3 days: 9/10/18 (3 WT, 3 KO; all female), 9/21/18 (3 WT females, 3 KOs - 2 male, 1 female)<BR></BR></Font>
</Notes>
<Constant><Name>Experiment Date</Name><Value>2021-04-29</Value></Constant>
<Constant><Name>Experiment ID</Name><Value></Value></Constant>
<Constant><Name>Notebook ID</Name><Value></Value></Constant>
<Constant><Name>Project</Name><Value></Value></Constant>
<Constant><Name>Experimenter</Name><Value></Value></Constant>
<Constant><Name>Protocol</Name><Value></Value></Constant>
</Info>

<RowTitlesColumn Width="84">
<Subcolumn></Subcolumn>
</RowTitlesColumn>
<YColumn Width="81" Decimals="0" Subcolumns="1">
<Title><TextAlign align="Center">WT 1d</TextAlign></Title>
<Subcolumn>
<d>488</d>
<d>560</d>
<d>576</d>
<d>374</d>
<d>538</d>
<d></d>
<d>999</d>
<d>800</d>
<d>884</d>
<d></d>
<d>878</d>
<d>514</d>
<d>604</d>
<d>472</d>
<d></d>
<d>1186</d>
<d>1329</d>
<d>1166</d>
</Subcolumn>
</YColumn>
<YColumn Width="81" Decimals="0" Subcolumns="1">
<Title><I>Dct</I><SUP>-/-</SUP> 1d</Title>
<Subcolumn>
<d>387</d>
<d>583</d>
<d>694</d>
<d>468</d>
<d></d>
<d></d>
<d>934</d>
<d>829</d>
<d>623</d>
<d></d>
<d>455</d>
<d>494</d>
<d>499</d>
<d>1021</d>
<d></d>
<d>1265</d>
<d>1307</d>
<d>1442</d>
</Subcolumn>
</YColumn>
<YColumn Width="81" Decimals="0" Subcolumns="1">
<Title><TextAlign align="Center">WT 2d</TextAlign></Title>
<Subcolumn>
<d>514</d>
<d>1073</d>
<d>906</d>
<d></d>
<d>836</d>
<d>774</d>
<d>562</d>
</Subcolumn>
</YColumn>
<YColumn Width="81" Decimals="0" Subcolumns="1">
<Title><I>Dct</I><SUP>-/-</SUP> 2d</Title>
<Subcolumn>
<d>848</d>
<d>1280</d>
<d>1346</d>
<d></d>
<d>1159</d>
<d>1451</d>
<d>1100</d>
</Subcolumn>
</YColumn>
<YColumn Width="81" Decimals="0" Subcolumns="1">
<Title><TextAlign align="Center">WT 3d</TextAlign></Title>
<Subcolumn>
<d>1591</d>
<d>1019</d>
<d>343</d>
<d></d>
<d>848</d>
<d>767</d>
<d>1212</d>
</Subcolumn>
</YColumn>
<YColumn Width="81" Decimals="0" Subcolumns="1">
<Title><I>Dct</I><SUP>-/-</SUP> 3d</Title>
<Subcolumn>
<d>2574</d>
<d>1275</d>
<d>1478</d>
<d></d>
<d>1266</d>
<d>3298</d>
<d>2007</d>
</Subcolumn>
</YColumn>
</Table>
<Table ID="Table20" XFormat="none" TableType="OneWay" EVFormat="AsteriskAfterNumber">
<Title>Compiled % CD44hi after peptide stimulation</Title>
<RowTitlesColumn Width="84">
<Subcolumn></Subcolumn>
</RowTitlesColumn>
<YColumn Width="81" Decimals="2" Subcolumns="1">
<Title><TextAlign align="Center">WT 1d</TextAlign></Title>
<Subcolumn>
<d>9.84</d>
<d>12</d>
<d>8.37</d>
<d></d>
<d>16.9</d>
<d>22</d>
<d>14.2</d>
<d></d>
<d>33.6</d>
<d>38.7</d>
<d>36.5</d>
<d>28.9</d>
<d></d>
<d>16.8</d>
<d>11.5</d>
<d>9.47</d>
</Subcolumn>
</YColumn>
<YColumn Width="81" Decimals="2" Subcolumns="1">
<Title><I>Dct</I><SUP>-/-</SUP> 1d</Title>
<Subcolumn>
<d>4.26</d>
<d>9.66</d>
<d>10.7</d>
<d></d>
<d>20.7</d>
<d>18.3</d>
<d>18.5</d>
<d></d>
<d>32.1</d>
<d>40.9</d>
<d>38</d>
<d>47.8</d>
<d></d>
<d>9.68</d>
<d>12</d>
<d>8.49</d>
</Subcolumn>
</YColumn>
<YColumn Width="81" Decimals="1" Subcolumns="1">
<Title><TextAlign align="Center">WT 2d</TextAlign></Title>
<Subcolumn>
<d>29.9</d>
<d>46.2</d>
<d>47.7</d>
<d></d>
<d>50.4</d>
<d>51.1</d>
<d>57.8</d>
</Subcolumn>
</YColumn>
<YColumn Width="81" Decimals="1" Subcolumns="1">
<Title><I>Dct</I><SUP>-/-</SUP> 2d</Title>
<Subcolumn>
<d>62.2</d>
<d>53.6</d>
<d>54.6</d>
<d></d>
<d>59</d>
<d>59.7</d>
<d>65.4</d>
</Subcolumn>
</YColumn>
<YColumn Width="81" Decimals="1" Subcolumns="1">
<Title><TextAlign align="Center">WT 3d</TextAlign></Title>
<Subcolumn>
<d>51.1</d>
<d>51.4</d>
<d>56.2</d>
<d></d>
<d>39.8</d>
<d>43.7</d>
<d>44.3</d>
</Subcolumn>
</YColumn>
<YColumn Width="81" Decimals="1" Subcolumns="1">
<Title><I>Dct</I><SUP>-/-</SUP> 3d</Title>
<Subcolumn>
<d>81.1</d>
<d>81.5</d>
<d>76.4</d>
<d></d>
<d>77.2</d>
<d>81.6</d>
<d>74.8</d>
</Subcolumn>
</YColumn>
</Table>
<Table ID="Table23" XFormat="none" TableType="OneWay" EVFormat="AsteriskAfterNumber">
<Title>Compiled % CD69hi after peptide stimulation (w/ 96h)</Title>
<RowTitlesColumn Width="32">
<Subcolumn></Subcolumn>
</RowTitlesColumn>
<YColumn Width="81" Decimals="2" Subcolumns="1">
<Title><TextAlign align="Center">WT 1d</TextAlign></Title>
<Subcolumn>
<d>15.8</d>
<d>12.4</d>
<d>18.1</d>
<d>14.8</d>
<d>12.2</d>
<d>11.6</d>
<d>28.6</d>
<d>29.4</d>
<d>34</d>
<d>22.6</d>
<d>26.2</d>
<d>18.7</d>
<d>27.6</d>
</Subcolumn>
</YColumn>
<YColumn Width="81" Decimals="2" Subcolumns="1">
<Title><I>Dct</I><SUP>-/-</SUP> 1d</Title>
<Subcolumn>
<d>23.4</d>
<d>14.5</d>
<d>19.5</d>
<d>17.7</d>
<d>16</d>
<d>21.7</d>
<d>18.7</d>
<d>20.2</d>
<d>20.7</d>
<d>52.2</d>
<d>20.7</d>
<d>17.3</d>
<d>19.8</d>
</Subcolumn>
</YColumn>
<YColumn Width="81" Decimals="2" Subcolumns="1">
<Title><TextAlign align="Center">WT 2d</TextAlign></Title>
<Subcolumn>
<d>8.12</d>
<d>7.37</d>
<d>7.69</d>
<d></d>
<d>10.3</d>
<d>10.5</d>
<d>5.08</d>
</Subcolumn>
</YColumn>
<YColumn Width="81" Decimals="2" Subcolumns="1">
<Title><I>Dct</I><SUP>-/-</SUP> 2d</Title>
<Subcolumn>
<d>9.19</d>
<d>7.1</d>
<d>9.93</d>
<d></d>
<d>17.2</d>
<d>17</d>
<d>13.7</d>
</Subcolumn>
</YColumn>
<YColumn Width="81" Decimals="2" Subcolumns="1">
<Title><TextAlign align="Center">WT 3d</TextAlign></Title>
<Subcolumn>
<d>4.65</d>
<d>6.41</d>
<d>8.98</d>
<d></d>
<d>5.86</d>
<d>3.7</d>
<d>6.87</d>
</Subcolumn>
</YColumn>
<YColumn Width="81" Decimals="2" Subcolumns="1">
<Title><I>Dct</I><SUP>-/-</SUP> 3d</Title>
<Subcolumn>
<d>6.02</d>
<d>4.27</d>
<d>5.42</d>
<d></d>
<d>2.28</d>
<d>2.96</d>
<d>2.85</d>
</Subcolumn>
</YColumn>
</Table>

<!--Analyses, graphs and layouts as compressed binary. Don&apos;t edit this part of the file.-->

<Template dt:dt="bin.base64" xmlns:dt="urn:schemas-microsoft-com:datatypes">eF7svQVcVU27Nr7pLkVa2ICUdId0dzcSG9iUlHSXSAlS0iGhIiKhIIKUlKAgSAsI
iIRSIiEgCPz3AnnEel7Od97/+d7zfPvav2HNzHXfM/fEmrXuNZu91KVkZeU0JXgQ
grBBIFAcQhwCIixYgvQRc0E2sJxQJNAPANII3+KvYQERloaCHI+L/C10QFo/Zx0A
MUibAQSS+JaCwgIKLKzDqiKGHdFh4cgQVFjA+BawQIfWoH3jkEGHepiwgAMLuLBA
AAuEoMNy4IADDjjggAOO/3wA13ZE0OG1/+jaDlz/ges9cE8ABxxwwAEHHHD85+Nf
Xc8Bnx7w3eGAAw444IADDjjggAMOOOCAA47///An/xwOOOCAAw444Pjfg2lk4Fou
CYtpwi7pysjfjyfH/v4+iAYBAYSGd7jj7oCUA7stQD1IhYFwkPpRHu+j4x0ViXL4
7UBkUCblt5x/gUwQiPJs6eGtxzymE7olLIYGkj9Iy4O+f9nwvwv0X74wQAkSFvNy
sAd7QF1cbZ0cRWg42ThowFBHCydLW0drERodbVlWARoxUUxhamk1KW0DdRmws72t
qxtYXUdSWUEKTMPKzi7h7GwPZWeX1pYGqysraGmDYWWws8uo0oBpbNzcnIXY2T09
PdkggBSbhZMDIOjKru7i5Ax1cfNWhhXGClNgs3SzpIFVc1j6D+bAci1tLdxEMTGE
L0G9RWFFfCvM2cXW0Y1NHWINlXVycYC4sR0e3GCWqwMU1EWYHdCAKX4r4PcluNla
XIK6sVm4QCFuTn/pYAi7usFo62Pidk7mh7LC7N+4f1GkrRvUQcLFBeL9vVAIkARi
3436QxknaRig+80UGXUtNVVTPVlTfj4uDlMtqIst1PW4nX+o5Zulrm4QN6isPcT6
eMlAVdZQF1EOYfaj6IHh7H91J/tRc/7K+20lx5qiriLv5GLr4+ToBrHXBCz8Z4zQ
H5oFaMKMthfl5xJmP4j8ubT/+ZFQg80RmMFusFPtnzMOv2nU8R7k/LEHf1/g//xQ
aFlA7GHd9M8Zhp8aBOgczH/O/8DzQBd2JbK1+IetR79p1F+D8B+5Gh0Z/I87Ff7Q
sL9G4z/klHB1N9c+rMcZArs3M7V1tHIyPeqz342Fuoq6urQ6ICvlZAlVhThAv3fV
X/3z26r+MGonHba/LfTXcTs+cMdH7l+24phFylC3g9uu4/dTf2vG78bqj4N1bLSO
DdfxMfzLUm0XiKOr/cHlTevAlgPT/1d3/gmadMw8HS3wf8ZgaNs6WUN+NfV/Ve//
oQ3H7HGEsNr/B3T3zzX9sMBKWNq5u7pBLYFMTajFX8vV/6ax+LmYkzXwp1L/ppf/
njq8K+DnZeMUFBTk5eTk5xTg5z1+WTqS4RX8G5ljwwekftes/+szBDbV/+FT5OcW
/lTs0UiyCrDxcHBwcPHwcPJw8HH9drRhMtyCAPg4BXi5Obj4uXl+J8YvwM3GC5Pi
5+UV4BXk/v3M4eP4O6H/sKkD60MF2O0P2/ebA2lbB6gj8FDqnzFzTtLAn0r9m17+
e+pw+Dl/8DmOsvkFf8z+z50Hv1wk/ynj/0vDjhn5H3v1/26/jiPkT1fHf8gI/U0L
fyr2b/r576nDc/Efdv3/fQ/+fHn8B06Sn5v4U7lHYwm/AziI/a6m7z3r7Gz520Xy
HzFt/tS4Y4b+J/jaf6hJQl1B93Cj8PuofDOTg4ONi+OkT/rcvJ2PjesvA/RTp2n/
PFh/Gft3dfxq659M/btSjlv6Z0OPvIKfLT0yVJj9YJdVFBM1CPiiGzoI7WB7/BAS
LrYQ++8bxP8StUAR33BYzuFutTzU3gMKMxvynf5bxB3b5D4sBygY4b9sz6/lHP5o
jpSTu4st1AWsCvX8LvA3+F4OsBcPlHO4va8Nu012BUoBazo5QP71j/78ag/whUJE
kB5sSIA9dtfv9N/i13IOv5T43y8H+MdDRJCWt4O503+ho4+Xgyruf/hVyXMgUMBf
sRt/fduAC3SUApT2YThMASP8PQWM0/cUUAqQunYQE98HgZJA/WiHP2EE5P+fWwv/
eSQ44IADDjjg+L8N4MKc8e3eCgR6BvJA/P4zh3DA8T8HRHHBA38I+AkODdjfg21p
K5gnBXayAks5OTjb2kMtwY5ObGBtF2cudiVzsBvUzQXmNrswg91gXgHYAuZiuEJN
HZ3A0hBvMCezJY+pJZ+pJTfY3dkS5hPDbjlZfvNNXuRvDtRf1QmBDUSUnawZDZh+
FPx/AMCN/VEfAUuCEAgfBCwHsLt/2ELRcCABAlWBWL7xPwNYOH63eFz4y/kAIHyg
DzgAR+7IvwI62A8EfFn65Br/boiAEmA1Y//wVfAjzxvgj1oNxI96BogDrs5R/Oi/
2ID40a/FAvEjNw2IA78+cxQ/+hUaIA78yuwRgF/JPUIOKALh0BIg9+fpDWgex3eL
D+36mf8+dkAK/Rf+xzH/mf3e2j9J/Px/fD/zR73yJ/7nr8//zB/13p/4n3/X52f+
eC//jj/e87/j50FH8xQAMBpAj//8n4w//9IQUCtQ8pE7jAcLwHkHuMWnYOE06NA9
PgMLRKBDN5kEFkhhgQwWyGGBAhbOwoIYCAw6rBGo/XA+ALqHtgIckCd+UPZfKx5s
WYUtkJBjyn8B/fspdzR5xA+L/b3w0SOFEwkfPXE4kfDRA4kTCQNdfWJhYExOLAwM
3omFgVE+sTAwHX4jjAkGg34VBubNcWEs8N8IAxPsxMLATDyxMDBlTywMzO0TCwMn
wYmFgbPlxMLA1D+xMHD+nVgYOFFPLAyclScWBk79EwsDa8SJhY+e551IGFh1TiwM
LE8nFgbWsRMLAwveiYWBlfHEwsAS+hthWZA8bEWhgMVtnh5kwAEHHP8AHJ3owEn/
78DRttBR6td76ONYDjw6Htnzc/o/Acfv2v8yfR9o3cGa+bct/BmAjuGBm48AMgIl
wG5jbEC/rqiHssuBR6PzK/PDwv0D86tfesT87J18Z372S74zP3sk3xmg5b9nfvZC
vjM/+x/fmZ89j+/Mzz7Hd+awN+EMnIEzcAbOwBk4A2fgzH+XmQG54IFAqaA/S8AZ
OANn4AycgTNwBs7AGTgDZ+AMnIEzcOb/lDkLQlSFJZH+LAFn4AycgTNwBs7AGTgD
Z+AMnIEzcAbOwBk4A2fgDJyBM3AGzsAZOANn4AycgTNwBs7AGTgDZ+AMnIEzcAbO
wBk4A2fgDJyBM3AGzsAZOANn4AycgTNwBs7AGTgDZ+AMnIEzcAbOwBk4A2fgDJyB
M3AGzsAZOANn4AycgTNw5t/JFP71flkg/bPEUfz4O3vgGnCN7/iThqF4/8Ex+eD9
UyBQCijtG2P17Qi84NYKRqqBDsMRgDdUAW8o/B95R/SRUalBhy+fBIwlOvamQpaD
FzweMwXnyBYcHFYQPQh4qdmRNKCLeGA+JmgaGWgI8Dqpw+anilcHAcdq8bmDF2j+
/LKtZPG0v17y/PvO/l7u9/QRTqZxvM6TaRx/8dfJNOBWATiZBtwqACfTgFsF4GQa
cKsAnEwDbhWAk2nArQJwMg24VQBOpgG3CsDJNOBWATiZxv+0VYLigkFACQig6YOS
JoMwQBqwo5qLpa0jxMUb7OQIZfWEeIMlVNV0JcBOVuC//AogIeXk4GxrD7UEOzqx
wRhnLnYlc7Ab1M0F4gB1YQa72TpAwRZO7i6uMANYjrftG1AQfzT1/2EA3bB/1EfA
m4iFDpyuJVjnIMA+O7AASFT9NcQ/v5MYJrl/+qc8ABcOpAEIH+gC7xgGhhqYBgeV
/g3QwX4wKcr/gsa/GyLfJnjOwZukgTg2LMyDjuwCAHTakX1AW4HeA3oHeDczoAW8
bxloNfAOZUAbBxZwYQEPFoA+JoAFwJUGeo8QFs6AAIcaBCKGBRJYIAUdevfksEAB
C2dhQQwEBh3WeHj6wIAK6B72EMABeeIH9RyeOy5QV3d7N9ffaSISHhx/1ASsUIFp
2DrbAyeRgzPExdbVyfF4AX8B/bAwoICj9UD8sOjfCx+N5ImEj9aTEwkDfX9iYWCQ
TiwMjOaJhY9eO34iYWB+/EYYEwwG/SoMTKTjwljgvxEGZtyJhYGpeWJhYA6fWBiY
hCcWBs6KEwsDp8+JhYHz7MTCh8+2TigMnLknFgZO0xMLA2fhiYWBRePEwsDqcmJh
YBk6sTCwXp1YGFjYTiwMrIAnFgaWyhMLA2vqb4RlQfKwFQUV1nwzYBLDAQcc/wwg
ICIho6CioWNgYgEn/n8XprD7lMPb4oOFA/YXWGKAFHDjvI6wjoAMAnY6DqWXAw+N
QBc/PJJ8Ox7hk9i3iPjx3O/4JHZUzr/7eHSzbgo6vPM6SgP3SoctOwQQP1pEjzgg
AKWswyJAAHSBBfVI73B76/de4s84XtfJNI6WbgAn0zh+ETiZBtwqACfTgFsF4GQa
cKsAnEwDbhWAk2nArQJwMg24VQBOpgG3CsDJNOBWATiZBtwqACfT+J+2CgeMj3j4
JAio+ejxPxA/Bzp8EocPS4Bh4fU3XuCbDO03GeAo/+1o/+0Y9+1Y8e0IButpg7ks
wR6uhzs6YCU1WDIQEQEBRQIBBQEBUwLhUIb7Rxnu38nw/CjD8zsZ3h9leH8nw/ej
DN/vZPh/lOH/SQYA8NdlJtGI+H6PGBAHeve4XwWMD5B3nzCK9H170y8yQABGDHjI
DQLZSN8YLxP9WQYo42jzAWSNYvNI4NIv5QBxdNDhg+camoHANi21X8oB6jnatAB9
urp/vZX6l3IAOwTFJ4OAOhFAZiAKWOaNb9wRgC2l41tvfzfb/p1AAFqHYAYCWgHM
vcMWISGgHxzZEEgOjrAhOjiiISAdtAYbEfDXgRjWwckCaErhgUGdByUeNuPoyHgQ
Pwrgg7zfAWjw4XmEhAf0+hG4Ds6lPwEDD70BBKJTl5Zl5WTjxqRrmVmdWShYy3nV
8gyTB8wBdjK3wxQWBrMrQx2t3WzAvLAsTTC7rK29G9QFdrSHuEGloRZOllCwqCim
q5sLFOKA6YWwZKQSS6tAUPe+VF61Cm+pUG3UnUIWHQOZuYLIV5wi2SrcwGaZawzJ
JhDBM4BzuVXOyn8EWhPbKa81ea/zfns7MTstrZ1o20Rb94MIHeNnT5jelVxjn2h1
eoe3MhY+xCVa94yrXjRXwphw5dy+pg9R5BBi4M2pgi3OHKnbZxWX1j/qkUyWlhZy
hw3V49/bNRFaODP2pT59jNMszjPPt/XjTU6yidV2LDQvoVZTCguD4bHzyTIPig1r
H11r0/LzFNYMnmrbaqv6Mk/91uBN7dcZatGo9TossapPxVjsYq3hjDEB60aFPZ4+
DPaU+0vdmmIel0YdzvIvB77Ha3gYv/cJfxOH12sff58wtuF6g3DTdKalRLN5wucX
CsmfK+3T+QZ3eliaZx/vrw+J1nxqHb95ZwcvMCH99Y13z6x316ek1GmzNBd4nqfw
9C70C5Veee5Q4z/Ad/bOh1P37Tbtex8+xNBxt26/S63jUPQqjjk3HnyZgdDNAQEl
A5quYTgjPNqhHhEaEnNjewwZRfnTZ6ZaFEKaXDOh2+71BJjv2CGuxIQ+mXGZhgKN
VaDoBP3ghF6JU7K1cTa3MTfXmvYbc0qyhUUmodeJxxGx05AS+i3Q6ZoveUtQc85e
dR4jis/hGKN5tldnfg3fpCx+uxa/ZJwmlJjocUSaApsjQRPWHS3D951YfB3MOfjE
Xo2yTypk1r2oBR+1Yt4K0rKPiqvOcbCXeusefzr5cU8Zn64AUmhFDl/zhaA4CxTy
BfP7zpToZPg49N7M+JbJkDVU8bJ4NgRqTgTlZQLJZC4GsOFD9HWX+xzdGO+bnnHg
kA+JN3L0hIcU22AynkoxOcsX9qXsMg4h6oPLYU2WyZ5XY3Kp+NLpHKPPhLS0XMs0
mwx6hvkC8xQzOuunXPQuLIlu/EjdjwJSyGJSb9BRy6OCqe0d0Zo/YeduvEv7sMeN
3MSVNWNs9pZUEs9QQOoNGipFHCKuPLd93DLUJAiF7ZPkK9YrlQkWMwK6Am1YiVeS
uT+TUzDEMJXMXqUmnBbAcPHDYnwq2haLED5bk5uztyrbpjCFAkoKdJ8T0Q16z63L
gZkTJIyaeMrHXTWutolQQ6mHAQPaWnbFHi3WKeBhz15avvSp1oQwflur07w0hING
JE9ef3y3maCJQVX/zG5x9N4lEhSHTR+eAjcBbXejtlKxzjv6cVhC9kazfp8Mo5xv
0fAVj0uRyba833pkGXeHiYxipqfi1SxNs8YKlsjbCVcTxpj0rA0zaw3xCXUzIe6+
p5jbPKDoJ6IC5OLWq4ir2jyGQxpNWkmihRf1+Gowe13b79xIfmgyeGoXgjZLb39O
fjHxGXXb1lri9VusXzwuzflXrae7+dqPOMZGk0+8WcT8Sko3sd6ZyYjb7aAZh/qc
n+0z6Lowb1WiGX0BOOoVPyMhGnqAcQhND0L/00U20qXVTy9tIfqkKiy8F1j0CgqV
LO9HOdBKqhSyPpHq4XjPGYQgl0n5xmN0rITtiX6lFN/4DbyVLX6VgssbbzYZCCHl
fLEEMtC0VpDCTDCKT1q1lcutVJ0HtvQvgqVZT5PwMfF7bpc7xTDhe630G43wihmO
d1FtLTuJFLsqGhS5xSl59lZd8XvDwmdPAEE3ln4s7/1qMcMELTntFCNRn5b/FdY0
UA0Pi3PZFJV5fvEMHh3d7aDJkqeowr74jU73QmNmKipYGyBSs2r2H1oSX5U/Ncsw
jo154BKCM7q73BzWZsh/bo7CZO6W9SuMDOTn0cJ4H051nVoNmH/v3yagZJRHpgOK
L66hDXwXedFXtyv1RW+v7MseNpwLV7ixrQUsBC6jdHlExG2jhKns4m9T8BjtcTAy
dbnthXCnCVA9QUHXYQ9+yjWvsXB5UK9LlW25T/K2+940RWi/dolcdAqbE1XwfGFM
YtNrdOjctA9kzueaQE4Eb3MXy9hLwss2skpD9/PRB7jZU+W5LrMZPwx68fDlvIoo
q6cdQ3VJZSJr7XSVg75juXWYyKWCS4+HzbVNRiqeq5+CsiyV93dzsOkSSD3vTGRC
pa9yuKkyMuBiGJlxU6MmKJ3qRZBHwm6pQy7jFwXOZTHcLw01n1x9Qxw0E9+qhjNM
QCU6e4lxzw2xvxUleCt/Bc224zN1tp8yYd+tmedOXkM3CANWGES9etEmg9Zl5sVL
SktSGmaUfJzmr7h9JAunZ7kiVFGqqoelOsOlTzsxltti7qKKhGG++zUnRZxMjHYE
qs/sPj4sXqT8wMw4utb78albeVZh9HRplaZofQVC0dL4SqUFky73yTd8jR9lcu48
S/68FeR8pRViqtvCitmuXbLBsO8zZsjwBlJQJrHs031vTcl8s3+iZvcZN1EA7aOn
5NhsAtdZ18Re0mItWI0sNEqxIV0SlPbJcA97GbTDjpOW0xTjQ0FmUg1NEZgcyS4u
LHkZgJ50W8TohvJWDlgruWjmxsfRUh1uTeJY1vTQNZ3VBRr1edIcxjHloFNOCIri
Nom5VVF6ZpQIURmFPezC6buvDXFvuN5vSkzR9+O5RU8twPUgJQhxzjFn0bMZ+cts
GS4j13IoHiYXtDo92xMRet/A/IYyxTVxiVRusxvKkptIMghDgc3nc0AkD+8h4qcW
ShrgWTObhA3UfRafw2MqxC0i2Y7jR4Sqayll4HFdaNYS9yRl1Fa8oe1ndofQ8kXA
2bjCxVDrymzblRSDiAdWC0F5HREcTqAb0cVFQQkrvMM+2076SDdAa+jqb5TTR2Ya
kIyKgyNvX+jC9eKVtyeIYuXy1BEWxZl3/FxZ4jEjqnuGEgc3BsrZ2MFTXXy3bBoZ
olyrv+doHixqKNDXIWeYA817jcwKKZdnjnhcIqFUJao+1wCJSB4+jR5Da8ZJLtK0
KHxr/jOiyVsEyglcxCQlqS4wqpRxF+tTt9b6xjtiYZ0BpnztmlPMDVOFxKT2LzQe
ujLZ5DbhEpq4b2ylmj/D9n91X9VN8tEkmyCCykVUHJpSBBsuvYsynGlpPoT55wYD
pVBVSsKkC8PAOxc9n6Jxje6EFMlE2s7fk+G15GPa1ddwZwp/OiCTyeT/uhAlpigq
RirmGU22Q2bU+QFzDRTaRAeOh3pQDpdSUa73KzZvkhSsCVRi0hKJyFKgiYZFfrqX
XmPJUL/FSY/ADswgvPJQ5oVx5c0Xay8d0mdyu15ECE9knkEaqSl7QoDDxpUeu6Bs
kHbP3F/BXc9ADg2vTF2XkkRdF1pzYVE6wRdykWltReBBm4i/WpDGgLAae1qITklO
8e237rmPKh7M5m8UUqIumrItGBezEOftexiyMNeox1155IMiSJH55YvMp5D0hNO8
D7bQrKHseRq9LhnJrfoS+JiJNKRYultnai3v1K2ys889l5tvF9PhcyH2rwjAiya6
bxbuUZL0QbK306lF/ktKtoC+/lnfDLPkEiuKHnSarW7uXtKKjFcIvV5so/5rftWl
n/vBSy+fz9R7V7/hD0zemX3lMmGsR5m6PC8/n/aGdMXOU2vJArdQbTrcdqa+QO2D
n4CHApUnt/e7gDtqnfnrkV/VqcwKExfaddCeV6J9pbriPLXPCXpSW1Ks7Oi+dAZX
/Iy+MJ1xf8xpHkv7xxcpXF93Rk/hVmov5jDzbnzSCDe71I67Ji0y/9byJa7/Q1kz
C1vOBbDNFIXfwLBFcFnbsrOAPDH1JwwtlSckqreuNVpKO55uja693SHsHTvxrt2c
OB6h+svj9WR1hYtP1vGH1roemOsUXWc0lq7/mlwXsAo2ZixVv9/HznDrWvs2kSdK
Aas7WvHXicVT20wIBO9M8aaFeisXqiLdP2U4DoEH55Qi3GYSUfyyQT53zTy+qEuc
Kw4bNH6lhsLi17VPFeFxW6qc9rqA5AeaXHV26RjeWzeYEpnwd4lm/NYH3usGdvRb
S01Yh+NKQmubz9+UCZ/WKPKr3EeltSyp2LZPRXBoaFa8ucTMu2LAUDQT6VsmUyed
jbYk/sBddFTP/l15ypm1p0oXr4heiuLMlDd4+AXceaqxowwnE/ext+O+jywRqTxP
EBY9GghNldTQi8PsPQNVJKOetKuyVAXteJYsbqYbFfnZPTNWMcV2SWP6gLzJSK94
FNEbSgq5vfngSa2zitsBA8jPQu4MXoMoRabZvUZU2G7XihfN3VfN3hntS4UGx08X
PmohVthHwpwLrsKEOlp+cwhgMcCPAJwH4MjNwS9wlMd1zMfQ9naGgtnVIdYHf12g
jm5g7kN/QxPq6uTuYgF1BfMdZkg5ObrBeFcw4KPA0ipQS1uIpJMX2IgDlsHNcRCM
MWE+ybd6AL2jetRdnCy0oG5gI1hUWhZWL9TLDWwMFGrv5KLlDLGAggExKVdusOC3
6ly5wAJHUU4wPxCFFQ5ml/Fyk9NygzlBBxpyMA3ObybLufKAOb9ZJwdT5/zmOsnB
9DkPWwEUIAtryGHjtWH5gPGaQBwmz3kUh5UJ9NKB/PcGHdTzY899N4bdAgLmYBPg
4ec8rnHcn/uDBu9x+aPx+pP8D4Uf7+DfCXMcFwY68CfPkvNb/6rCxpxdAnAvHQ9U
paEethZQTTnJf+11ZiV7amsNE4V31/HXvTpFA6ZbJ/PBAPdekD+DrBGpEKSOGBZK
7yGNIktIwKRrqf0UQS6cxkKGEOtKiPkQxiq++rNGDWmZmbHoSxjLxbxr4+m7bQYT
w+8fDw1bL/sPPQGpfw1BbnLTRwjiydUn/LjQePHU6Y6WTUQSfARcfYSnk1ZWyHJb
0oj9X+tE0tLuyj8r3/jIFmRZM8rSoE7vOrgfGE/DL3UOFYQpM8AnHEBPPIN4Q6u8
lZRrH/nFehITVxgnF1EuRt59mqmWUvuNglnmmuepKfTTuWQGXaS1PNnRNerj6XST
+dHIuRdT6d5a5/uhQeu0FdJBM5uMfX1bmcogDsI008739Ln2kVwyhKQfI1cRQeg3
WgRrXXCvfRG0yQZ53bGejkKOVDC/QzCUajvzod1qe6Vc64s5J/ONZpXJCC/l7vUK
7OscxEGlTskyCHQGDmk28UvFFEtLBoOzNl8ahicoA7R2Rdp9dnRW6Be7syWisw0m
7Bfvs9cRgTbOGWacLa9P0gFVOKCKz0zeV1sGg1ZRQBXjmWuUYfYmCS3vsBmwri0u
2rsi3LzExvyBf+dmiNOLhjDBzbSOjzu6F+4QiwXTKpzhhsrM3Cm4oyTd2YmNm9Jt
ubuJvz/1VND25fNmlsybT4lXrn7Q0fhwAyM00qbmqnCwfhybJWZo4MBkIAkfAxpp
QNYlQht3U5D/VUH1KgW0dicRkBQt0jlHMR9E/wUjfE7M9vpam+L4UtdYLp+999tU
WBejHCeVJWi0ZjewYy1d6PJYSPMnQu0bEU/FobnlYPIEs3EgspjhUARxOyONg0Gh
QfL4SMlIbPKItuLIDyVEX4MwJThfI3hcsXMG9Qf7vEJWDeFzRr2IrPcUxxkLO0hO
HDOsUYkDYTzYFj3kE/6ZPIl7cUS38NIkB/HJDdG9pSTUBQiRWqUi4/ATxL+8or9L
cv7KvVwpdZF1WjeyJ+jGV7Zz0F6BeVB3EfxDCVIR+yA4r0GVQcNlFyjQ5Zo63kp7
nclEI346OqlYRSSK+7iJeJL8E4jlqmlTIrp4OzpSj6w+OvmKtGSc/jkEAupL8TS3
EAtl0uNwb5FXx8jHX55GQg3PhaSSED0jnQo3iJ4014UMmityDKRapOoqE8/yWeFz
B38JuW0+8OCOPsN9MQ8MPoKMGNYWXbNYM6OylAdIryGLFyhw256SvqNwDqgiucjl
yFuC/BhvKLomaKEZZ5J+xav2/Djhcgheo+sncz/qesxAikDKiViqZw0McRiGyJdC
8KiTwefsz2njk6G/R98NJWji0Qi+q+ZGE4bv3XLRnOnB9dcStQoU9KqJhAph54g1
zzGlVQRrK9jRGNOL0NdRJz4XspRzITEQN1ErOXcTbEqHlyCmfoORnlBNkUJGclhV
ULFa3FvcW+q2Js5dx379e6lPsgzV6qT9Ff3Z5RK5U9ZSpp4XJxbFX0paSPGlU7sx
lOKZYsp2k8GUOlBx787XKkSNRvFGreD8Mt1c2cmKJpGrCjLpeUnmEebp5pHmV97x
tmrQ1SYEJzw+pVYoPlfWS3ebmkyy77Z3b1WFSoXQCHSE46wc/62dvsS51nWqD3Xr
GFA6qNEM4wzFDNlM+QtN1CYOsy1uTdLb0YnRNdGxazyz1d1T3aN8pbYm+7VMSV/O
O573S6JJskpCSIq9p6zjNEA4kHXP4Z5aP4cdvR3EbthuZ4CtKKa7oNszuzvLlGd/
+mv4fNmTSJ+qbbvPzfMi84lk6WT1ZKRkOmQpPM94SdMd05+nz6S/52mrsDHEeoRs
OGP4/pEJR1Lax05tK7rya4K5xSVLBaw9orfGikSKLe6W61vnq5Z3nTZOYDPil3h8
8bGWp6SaErs+u2mpxnKuqMbN4pu3GuQajAJfPH0FHjG7JpHReDc3KrcBkg3Jn7Sg
vRdf1HM+3zD/wjMBi8rLUSuiU0b0ZZFZCgkKMc9VtF73j2ubPemu6Ma+NGtDz1PE
W9OWV/bGwOC+7GCOYLNwu1++d8YXZiyRa/rXsojGiExZlli0WBdYqAyYDFD0HSrm
y7abR1rSLxlb+LeF2U1ZlHfdGZt9VFzIOuHRsOR/Id24bIyoRrWmewN3g2aHfocT
TSTcK7wOd/O1mwdjTaj/AMHCh8mqrpXoKTQGX4YHfQoFE1kGXUxdOF35WNjEn4j7
WUlcei5PVlG4xLNZskWbejnn9uuMJk0ZLmx3qgzFvPdocWgZey0yvFu1w4ynhBcv
d63tRkHie7JuLJOIlFK9eL3Sxwmb5st2ywWiQqKRojGip+s96ov82bcgu4i7Httj
a0Of3m8P7aghCyDfx/iAeQtZFlkXTRSLC+MUijtycyNCY00IFXuv6bmL/USIkl+l
PK4KY/BiG5/ZdiVhY+G5T7/oXaXjFeDlicxqLiMt1VIjH9ve2y53LYZIichT9rlc
q8yAnIqMr0yKjFKKPotB+bRstGE0+I4IERX5Gd9zHi6Fm71jSuFTi+8wpz6ycV9M
Ll8ccXk0U9jRXRJn2mhw+TwlOdXZCfz9yNNNhTPKJeum1Z4zyEOJNeE7Ce+fMb+P
WTHegn6NR04JfRjaI53SYhxpoVCicEZhClFN4tFb94emq8HThTfibuQzcRf2FL60
Da3YquiTpINElTEbc4sw1LE38+RzSD15YTvwUed0nnhPvDKjq4FVTer1PeXP8tHn
MuiuGGCV2z0ct5aD3nyh0Ukwuz6dPu3Ycfb52vOdAF4rXk9363qPvbCvjbwfL+EW
Xx0suTharepp3Phk8nP9QqwD2EF++FOHbEcMlHzCMWq8XyNHo6zezKZ8efaZZLWk
xmQda5cRrn2r/Rn7pTGr8mK70RQak57P5h3vot6p0b1JWJgw8Nf7Mta5EbpUd3vj
9o7nWw90zzdjc0/W9NPMDUyGX5W8NS6e6VzNW31co7dYrwsxumyGZxtrGVvBdfdh
nWKpndxAwfyt+WCy2PTZunnfx0tZI22jQw0TDoF9CDFIrWiilIQUtYHtm+qXiiUc
WiFvJu83dy/kzT9psA40DZRekl+J75a7Kne7rSnWfeBC/xD/Xf4bfE0xCc8eTF1u
c9p9+1nK93TRnDp3fvUWsgC14Mq7ti2q5Wxs4WHvKP97cwy7NzcqXxlGGeYOvhmM
rLzFZ+ur7DsxF9SXdbbrLKtYxr7fevRGWnr5C2ul7viuM5kZgjc9A1Yln11duRZJ
HC6k5yb6pGK6N6ukrGS8Izil1GSl2qVwtG7nq05KkXWJoPEF/yz/uqWw3ZhByprs
ZNPFANu5R8sOdXPO5bvJU8XX61H8328b77CPbzzxn7m+n0WOdA11+yNbve++yRuR
Of/x3R60QjwTsU4fgV2bXYvFqTwGTLXz2ffEincHtoasCuvWF3OGzLrLI6xjw6qk
2PeTvpSqNaN0F3Yzy1bIzssVy3VHf4ke83mw3vqpIzqlb+pqA9Ne5WZST9HNAM+d
Omvz5y2fLvUspIkpjt+tF9we3HB4b/lhus/TdvlOQdR4Ub3YRvBu7o7Felv83KLa
llrSzRgxTz+Mr6te9A5WsxOboWs7v/ooB7ehB44JHyfXUSbgBQBHmMOgICUlCXGF
WoIP7mE1wcZ/KR4JHbun5fp2P//fuKe9qmMUQa5Dspco+ByzpqtvZID1llSdG1ON
UuWZsdsV6UaJFZfIHg4PEEmUJyZadi6e61LuxfI/H/LuWlG9gkRtHSt6SK9P4yDa
jmahuq7nAg2jaIWXBOO6zOOVC4mW9AZ2GdBuv7XdiS9O72+S5gU/kqwr2TmTR9fM
5/r87uqbHosXT4W+zFGT3dIgY7mrK5LwsutUgCRzyW6DkVicGocew0f7ZT2nanIW
FyW61TG0et2Kfrq3p6WDy+3GKiJRwxrVqB4vIF6jCFM5h/417+kMX1hMGPHoFq9c
YndrjiAWS1GSJIEXipffg3D2zbceuOpP1RLI3/Rry6zTXBpUTO86K+VbHV4t581f
dYtfvXxtNNi9/V7X2Wfu2I8aNFlaULKRTTSwIgXfygWV8j66qow2UTLaQ/HJQnov
K2beD9mL3/meJWUmWhhVg4HtrSdbWVpJX8vfPg7ef6bfSTG3aKxVTOKjcKFxouRT
xQenCHlNngtZMNm5IIMODBGXOEUZSjVQLFKDSfFZIsGnBetpA5mna9utl7Tp6FcJ
v86kYIY/fJr/tMFFhGk9gm7X6HF5FoV++ytuGjbzBwKPM30mw68uKoqiUF5Oc8z4
0mVSebEX986FbbXzVoqfzJcfPfnYyeiCtfVSVrX/un7w85A0ecRma3BHjHePWnBG
xVtm/AIyVnOd5zkqmoxyClHvDBlOJ5+yvXVlssyFg8LT+GVoeXfeea+Y9Osvm9Ld
byxlGRdLQstQjT0rzrdKUmkgZZ9fR3sdtaCVS/KR7O2L/amCrI6Y6zfJyCGQSuL9
ndcso913hrGZFpk2eC48fWdm/Vp0yJPI98mZSD9HsOJod0dE+9kxRLuGCDKH82a7
KFFkBiXh9SUssXzPhDtI11BU6lafTYjU9ZaVz5+n3xbymTYRwftKVEWp3/qE8rWz
P2PwTUTyLSM5p1pDu+y6PuhlTTLVisGCUR8iYx3kpPmuLjo3CamXtQWzkSZUKaqB
X3KIHZKyfPfmX93uo7Pw7reQId4qSjMiFeL++GCSqjkwTK95+aoY9j5bHav/eX+6
rBTRFLZEGuM4NkVTpQlFKiXTqu2al3G+G+e4iF3pVon6BorLHg+l6gued0qhSp5a
xf2i4T2ow7QaIUxXMG1cZu/Z/TLD6fZjl/UZxjz3Hdf3+u8Mei6qCSBN7KaCXl57
zY+01q6fP/XJNm/CfBxbCMNhOXGoMOLqa0Ilp7SPtpxrxhON0hyU0XGn3pzNxFBF
wcN44598pcYsozH9w0uctcnz2+dn+MSo6xkIiwbU0g2rzZl9myYZktBF/S8qkM9P
V2m+cm/lNIh6zurI5305ocVTa5H2SZprfXi9g55wV0CYzb6p16b/8uU2Mmlmop72
KUr+MM8ZpOVTWb6SDqkvK8VWv9TTPlT03RTYrM9lHDcVe2zIv0JJ7nXNZu2l7sLN
TaPil3hvA698CNmjyrnpp/PrsnawEh0sUxz8gkeZR0vdD8va4ROPv5Y1LuAxxM/L
2uHjCNiyxvmbZU3OBeL9r9e123po+olDZKL78k2Kr7VkX7dz5SySpiFY4klom5+S
J6FGDQmqYmzFHGTFpTjDGqVZYUjAyNb/LsdRfaFKXQnlNlFRVZlPN0bOq43qTdHu
l/sUe5t+1n4LIhOBIHHj9iT5h5dB4tcFTMlOdahmp2U23RpDwhQnvosol/NiZkbh
dU8PgTMm/vsolA8iK5sPsczkXZoRlngvLzZsMPpJUOJ1CaEYEYjFpiCBZnFAxbEM
8bNIOTYIM7NYq3To4ZL3k85QkYMunwdhns+/lEuSGoreglgY0YYd73ItlfpNJgVb
33BPGinrSxVi6P6VAZue/bWO58nUNT3dyHxJtfernLc8QjdSVqqD0Wuk/FLbcKLI
W2OxpCPj8XeQgjIUVgvaJClQV4QNdBHJzX0jFvpuN2Lg70j6GTFiyXiRgUJVH3CI
YphbRDS3rNHkgzdC9ds7sOSDX6O+I8sNurKKbCF7kXDG9R112HZEQe8bfZ4JIlBv
Bjs6Nll84pxB9WQ7KjfjPlspGPf5DB8xFlJcljrxcNJznGthrzHfEYcs4vNQfZTi
jJuWyxeB3DzF2HVd2meXuuTU9PPdq/6KevUclDOdpKB7BvU8lMVXKzWm+mQaKSKu
ULMRKkrFU2wriVA/T17Dfha6rXr+mky9FJVtI+JlxCjqd62aJTyMyOYkzIbM8i1V
4iCXRuGtFLSWHDQOCUr8YETBF6CLcUjkpw3N8IzQM+nCVDCtp4NZGLuDqjanBObz
z9jEIF+fDnET4CYvIU/kQqAqoTII32i/ivP5Vb3/qr93/jZFbj1oqjQY+zpWI4iC
WJIHya2D7uqreorXeEGapBQdQV61RNbttNb4rI/dW1B5rlesx9o9v8q85WJMuxCX
QluJIp7RmkNynXp0OjvxyblrmZgZxKQS23Es1XxMmRrIFNMuTtX2ygsM3fFOu1SP
usIrr28G+NU+M/cje8ZM9TETR4Qw9hkDnuEa7kgW75NtLZ4ZsiGSdvtzCfd0ODMF
H7lci1/u1Jy7SLD8Yr5xP+6R2jBZ30cOaieNKW9qa8x9p9qgJ4xDTHpMeIz8CKfr
A3PdNLfBT5Sq0W5eoFqKpGxDI/RtoSD4yhwiep3TLNRAuBp5hoZclJE98PGaVpfs
xpcOXBLqoWsCHcnLISTJSOQv7otnD+HfvYm1Fo+Wz3pFWOaNc1A06c0aAtYpVXFf
hSJKM49iYXcEjoWB9O6OR+35Ywp8t8fVbdkViEs54+Rn+5Oxsc7dlNWgRO6gNZUN
0fQdpB4EXcIryv6c+fltH/Yg66DTfdVBNoHVUH01Crrrp19KY/UgpJYNSWbSp8/c
zba52v2YakjFcqtdML3duYV/nDE/PvZLfiZZ9+5lyhdTvESsPIEsWmn5DO7Cm+p+
bdyo0MXAchs/WQbd0PjFdrWzzZmTLTmc9qRs2HxIFqlNbWmTePGCzdEEja+u5udi
X5IFW/S2eUVnXrZEE1qOgFi4T2qdUQrLt1AW38Ogxru1mt569vNmqSgXg1fk+XSb
r4VNHz5ZXrchK8SwEGp7d966PTQxCcQb+RTRJpzw2ZksD877dJ0Yrup0sjroXKcy
6LonxTKRe1PdaATLuGQQ6J/TG8vva0TfS+L3Uy8mKxzHvUVF8ZkOScFTu+2ZL8iT
KpL4ns2+/e5WInWOj2ZxoYT2pS/jLst3g/vV7TjMNLPiMoWukqE+QEtPYmcM9cQD
IbrQyWhqhHHcfB72mAIhkXZWcIQ7y0D100LYR2UbXFC3xbQntXLBFYZEouh2+fU8
EJ3XzV7E7U9FdrgNg7ivmPnfojSkSXzCxUd5J8GVirSL36SsCLFUesqljnu+kayM
wB7lQiOlOhrZU4gzdkVI31s0Z4yLKFlv2b5mr4cwmOHXIjeThPVwCN2JnLOgT6Wz
Che0+JjKThQqY/ZAnys5DGpmrhyWZHYTkvRayJ65Equoub41/UHfa5RFMg+0hcbt
B2JljwWCi94aVhE4XlVrHLvMR3m9bap8BdtP1CQ6ZbLo00svHJNY/ncFK0peDOMx
Yo3h6OKMp4VCmSbFq04jSBPGS946rWnOqSGhTcArjXQfYakFJy+DBDwep62ZaJmA
y3Et1xLxOe37xGvPk6Z1XaiG5bPpnOJEpsFfsiULSDQXGbMJcaH0dFceBmmqFub1
a17X7GrEHFPyVrit6W4W8MZsPKEwrf9qf1L/Uv+Vfq3+S/3h/dRkMXfUyvO/vMqz
uWgoWpxZeVVX7YJCjerC7TpddV0ODWdddF15DXzmG+e1mRb1BHKdjSfjm8ry0vNu
5xWY36AxfSB/+dE7ylaiVuaouqhmxXnFQUVRxRXFNMWOG3zMvIxZWk8K1i8aGAwr
D0sJyhrcqtX2Ll+lnll7IfLCSZtH214HUVtTx/J8kfbGvUzN6vzVTNUCo57dOaZ1
v+3zPmd3sXcRdnmlEifb33JsRdNF28nSTglNFd7Lu3f7vJH7dbsHdknzBAPM95Ds
oux07RDsLj5qtRuwe2n3uD+sn3cgqz+/37Vf796yXkPOeIFEX1kveu/bSzdsFwcF
8lfUE1/xDGG/mrYNuFMtt5ZpVUqk02F4LT+pUKfwc8wgFOZ94izZjkSOXB0ZGGl7
VOOOfpb57HXVyi67rGYhYyEn9xi34SeIY2ee4DwZcjedU+ldGzr9QefD2f6Fft+i
7n683u5e06JA5f16BFuzS/gWZU/NwhsFrwQrGCbW0q/Q6ygLCc8xSL15Ncgx6Jw7
6diM20xNa5GPTxvZQ5TPLYv0TOjZ3rO0Z+TRaiSbGTbpW+kRynypmTzenf1WD9OG
O192lndKaEn1qWulzbH1ddxpthq0wrC6bYX28mMGc1pNRkGGE4cTN1UFx4NUiIb5
5afvGJRklDyVcmfoOzw69HQHdRV0O4qvG3w2WDBwvX+tGE9/ojx3dGu483Hhg2rB
NKFhf5fB6aXE0pF3lWyVkqN2o8weVVlFWe2ONWO8vlF14XWv65/tJV+JQhrNfToZ
JBWbf90i1KJwirOtQIvlzi1lgwu3/V/4JmMxkweMfRSyFbgqmCT0SGB30n6h07XE
o14wSZTXaz6hUEXrpkp5Bn1qpcWIA7FKCilbh/HIxT03d9ekJ3xVGzUGVberHVxr
ZkpmKJfqe3dr0VotnrSditWN5c8uyf6SHS4SuOny6cXqyPLAe4cl1k/jU7uv2jrD
F8o7CkZT5jJmd5KcHt8spBoqfbZsHegaWB9YvE+7YelBX5O96yZ06Ynbds9cKaIw
EhFKJuY5RClEZkR2NFtkOmQHHB98e6JMAj+wF0cLnSWkvVBd0cbrw8grIwpa3Fit
NlJsVywjQg++i3TCbH6XtroJKgl6I5JJt6LLSBes31yriCaUo7yGqJF597PGZn5x
/nu5QCqpmMjrhde/8A4yVZ6rFFHldnR8s1eVstI3pdc2oVKmEEdXQXeP/g79IF29
IqayYUq/iOuLThludjryc9cSMjRtmCKZHjFJlYdYOWQOZMwnGGaP8I76eEwuYrli
z1p2C4rqubN5foznUTTUHNmr8HzD6IjjaUNpPV7pfaUWNE4/frpeLBCpwfQtrT6D
142PifVsdezNDBb+sg2v1PTpKPBRIiqjsqFhVh87/ZLOJD3iX5Dy0NxopLiaWZFp
9SBMQMmPb0jgMcdmeouqJttc9rJg4NRXCduqCj68joysoRulKPuNi3HD7aIpnwm3
iLSJa03iqt7K5/rkVpXlt1fayPTkv3v7rpQ4Acsba1RRWSk5aZ3FnH3kEYmRsNPl
0VNrdFAln5QwlrHHyrYGgw+plAxuLyia+iWvGyilaQz3Pgy/Ge4XkJOpwcba8OjN
pS9d7O3s0qYXTTjdW5PPLDNvnSFmNkjSSVrWXdU1+do71/HSNEA/qX5+1W5o4MKg
+lDEkFvxZ6Map6ztJ+/c8Ya69SeqgqtzzZuvxbjym9xN133kmthLP3zn40uCjIxK
fXuD8pkx3cnBrvm5AbTHpI5GD5YGPPY2Fi589eRZ5BkxqF5b0ssrdVzGHB7Qt9DR
epTxpMZss9T31GZF4NKeuzFstYAu3fRt9a3ZbP14wei9rt7jCef9eaQthOHgve3+
7aIJ5IC+/revyhZyuhpfSL2NW3w15dRXvyREEVC1FLETH7bM0jDqob1mI0M7qN8v
4KXsdb+GqXrO0FXf1eiaXkfP8tmGiVG7EUP/iztb86cVGV6o+gkY+Ll8uDHd/3Qu
ug9vdLZyTIR7rfNlOac1+00sMc+98LdUXRXlo2rZm4ITPo1rkmsym9fa2KpN7Bad
5wS28zti5dhrTBxr33ncnrvXNpB8aXxI9eJmTcC27NsYKkcXR5P56MXawaRX7ju6
88UfR7+O+ns+XBbeKXxbMFmjNElX/65+ZPceWhie3R7vF1O0GuOa2E3kDbevFJtr
Y+G14WoBz3dmjJ2GS9dNiyjThO8tuH68tIT3sWHba3BqnCGBoRlppqFwv3Kp8GXf
csDmfp2F86zZMvdcOV7gfb+Sfb/la7bsI2F54ZS1nd6CX++9e7S34O/0ZqKiQcVn
x8ar8cJIzctA1b3yGf+tHV8qF1G/LX5W408Uv/HjjvbLubn5+I8yj3ZTj/txB37b
MT/u191iYJ/d9U8758BmuLujG+DgKdlauoKNwIc+n/GxXVyuX8uUgrhB7J2sjwr/
thWuC3VxtXVyBLNzsvEc3wU+7loe6gO74WB2LXdzt4Oktos79JAAGnVIympqacuq
M0u42ELsWSWd7C1VtA/1pKGuFi62zm5OLphc3/bdZRxhfqetI8weFYiFppMDxPF7
jqyti6ublA3EBczNBfNsId8SnDx8YHY9W0s3m4NG8wtgAt1y9OHiBnzm/8PPDyX9
Vz68vMDmOvCXD9ZnsOO3kmDWfcsHYgICggf8UYANJCwHYLm5ub/l/PL5yabDmn79
AOX/MPS/fpXgxyE4TKtCHADmtyNmD7F2Peh6QFASNgExjVj5uATArNz8sPZwwOYh
JwcnJ2wiKsCmlK2FhKO1PRRWKbuEqwXwxRBBDl7ggcNhgpWLkwuYfM7yUFtrGzdM
fk7YIGq5QR10YePJCzy3gBwMOqwf2PUPZcC8nIKHMvJgTi7gOYaH9cGwg3n4BYH5
4nWQwjyw5MBGWVt7KBeY6/BrHMe64vi3JI4ekHz7lsphkhNmBPdBS//FM5FWX28/
bZnKQJ2x4pq+LJPeOTojz4LEj+ey4vCFMILlHcGR4tJNdmQv48oUZK9Ki9/QiKgC
N9JVOdHGa5i1kAqdbZE2ixC6Vr719DLR55fCa1bO+LxUaaTScgqbO4NLQUJTvg0z
sRPLYU8KkteKZ/oLtQrm+RZKJ8oSSBT4CSKefH2yoZonMt6BnitmEtDs48SVpasc
8dBS5/3AEF0fqScBjbHr50f8xYp3XHUkewtKTYbradLo30sw69HSpt2BvKodGCpu
4EzbyERxqPZYWl1ZvYjVe7rkUsPlWv9VtFt1l0ZKjdKmS7dxbCTej7gvtPU9vsLn
adLgknmzEt9895HuncEiMocaSTpCTrQv5IXUmwRpHObUty0JqFffL56hoX7ZQecx
MahXK5eSfkm0p9qdzG3z5qWH3tM6D9b2usXExKyon7h9mucNMAFlcrEGCKZBqG8G
7n2hd8seWh9o62koq+k6J6yGC86B1Nah+6PjV3z6GmR+Xg9NwsEj5hlF7mpuS9kn
P/sX51gbphtXP9I2BTy8oSy5sfeaJrsuULz4/eIOGr2KSm9vJFnMXEJrVN0brRQE
fSZE2tmV1xdf7eB7UFNIxfXk7k4bhyKHgBdPe7SRidzdMtC2LCnH6jYXPz/eRnAK
HdFnn+XZKssXL2E56dJ6/hz+1dmGglyuq8sI0GejIa9inEGTAiHSg+/qsKiDweBK
cmgNxmkPLLU2FkqlLAmvKHsJs6apFmWmlZwNOTSWdHtKco6CpCJ3oknq3uin8tqp
UmEEJPfGMF6rNj0dJ2ROuxtZZvs0ztARYR/XzQdN6CGSysakyqOKKJL3E5xxs2+z
GlitKu2qllteND1vD2rVGcdmeiN/t0xTX+prC6096ksEY9x0nCfK+hLKhmIDCOW3
a8mXBkLqdOUZrjKWnKa4RVFh0g5OIxsN07d7mIXzICTPJdor7G2vfmdIZGjjvdM3
9KvbfPXf+hRheuJ80PLa/xhl0NsRi+mJjvngShH5RdXYL3fNnlKQV8SzULzKeOG7
EN0kie1K3fJOgorpVufEvTL6sKj5+5JX4q62viUoIXioIGSTH5ffU9fUd4tgbhkX
+aFwc/hVNJ7+3VpNHjHWQsM+VOXCmWZ3HwiZYn5TXWqQ76NnvmiIiR0KxuKMYCg6
Ntd4yGuiFhZJPHOR1EeUndp4VvfQsuaDNwggFxQrrxRov5YWuhpzixhC/O5ica8F
PqMp9tyD2pBV6kbWKjBJByQigYbfQvzmC9/ZqOFeHr6hIM5HtRt3y653ypiRrG4j
FBT5LUFy5ckVV4KYE5GELNSH8kO4BXnvPm8smL4bhyLh3GiJJfjATa2i6wqPniVe
7iLxIjLxKd/E3WQ1/gvXeQoaKApKY/sClXpbOC7EXyRcHMq83g99sKk+rLkh9xCL
8xluuZ4C6XmvcJzVYWuncmpNrG2iXmbxcHGG4HrCtbpZUssrSOAPO6c5E6/gJdeR
YSVdlxP+MkVgPevVMstY2mFdWpaiQHRvS8SG8kOHfep0CCWSezBu+edp3lfE+ihp
mD7OmXupZyfPd5lYhrdbvgrWP78syXPH2QVM77raTKJwJ11JRO413nBAAsIgVQsi
KeMbfvz2tVS8fNEX2dAFi2FKo6xgERWjDwYcn+MfC9DxVV7QbWWeizm74hOmz76g
Y6xjV2+Y95HgxWqH4osN9HE/p8jHL2rajKwhm01Bi+b6DfZo4zotHTki6Ocl2Ucp
TxfluVuQnKYiph3z2rR9wFd74RFJ42heq9ccKatux0ewKwHJ/OvoMpRc8kldmnd1
GJMX0Plp3+TN3JezR2qS1U9UBQsFf0DO05JyQ+zBkGbAzyILefwGQ7ogzAYpDyeC
DzzCI02O7yBegdBzh9orcDTIpg//pTgPUg+2dHmYDWoeaYQVOJ1XmhvIvIR+5uCj
I3VX/OBDJokC+wzgQ8VvIGigSqeFMSLlYUdwgV/wSJMCmbbo7Pgm4FpxL95Q4sMo
WRMWLFoaVgaCIDQhhspI6QcdRPOoWcRhUZsIArBsEAmCubRUNIgTsQUdn5bMHBnI
fP0sYFJ6TA0kiNCOIa5qE3c6KBM0jQxm4AGSIBdzvw8X8S9CwoLPonqQvIbgXMBe
5Chrfop76TXEGRfpwn1Ivrh0cAQiwQC+BjgPiNpFMAJRsjy8CFHwdtCHPnx/8XWE
HjTpm2EfkIBMnB4saXb8OvF1uwgTsE/wB5Q8Pal1RFhmadiWWDaZB7NDD6QUOlah
nm/ULkc2pjze+4H1lmk+f6II2S7u8L0elVuK+eQK4vmpdjElDJRnY7zvdbrjpgZV
oysRDNIsSgoEOWNL9Ji3EfgSUzee77/Yc79Tx4MJ7YZFlJs4qUaqQTbzcgJee5vl
XJAwDbeTMT23rQfhnatv0CjojD7tkSBkoI8/MryffLXHkcSjEjEQQqRbnD8ee+3D
Co3P/QhKxrzNMz1CIjU3otJvryWcR0V4RTRAkjrrjZV7Hj8TtcNtOTc2M1s/p5db
PvacQi6Z5CptaECoCLoRwT38FwSK+KsEwug6wTRPDfvfrJyPDUIl8EM3CT3/zvmp
ToWB+zw+d48IkhgngYgTgz7ozaR+GbYlB1Em1qo5S1WnVkFBuHycr8w6Csu93Rw0
8+xExj2JBGGqNQpZO9PO06i2MSgMQRdJseo/FnL3yLTQunxouvwEdLqrb80iu9Us
g3iNMCTUvBH0nk1S6gsja6ic/ynCyzhZKfbPqdaUUTwdO7VeVrufa2fIfnFLeiE7
VEANC+nDqzapCplbdlHW/WtB72nXN6XQieZXKj3VkQWzxeSJi1C74xMKnl58HzlA
KiC2Eb53mWxmHaU7++tSNoM68Uuxae9O7kZXp+c5uMObOROjj+jNs4vHJSpNVdbc
fF8ILyip+gx6W/mOiKyJFH9pj/UuWaWYHDtHMNK0QbXKk99kQCIT0OlqK7odwsbn
47h6NzunYMQ3tCNFeVZFKlHpujNG3KrlQmuck4aoYaw3kQ6OZpHhrUwNnyTmpLkX
2q2l0+cFFSvNh4bdiIzvdd3l/uAmZMAwn3r9w+KVSALelm4MD4MLbO00ahGGb5q8
KNhrMfKFZK0SbdJftaQTKReo9EzO3LJN4/dxDA6MI5tljVTcm+Oxu0SjglUgxxCe
jprU8tVG5y7TPR7T4V61uTqCadlh4ys3WOxJb2Fku8tZ9fMhXZ2+7ssVjn7744WP
kdIRHZeliosG+V4ajunv45TysZYXi67PTG3b8VzYdu4LSf7gOhxvIxh77iGtSo8R
sVepHam5lZXdXSrzwkxpw7AWVSvH1O611q5t9NeqdvavZrXL4sEMZn0qDCZdqL5c
WeWQ6wl+CE8b308h+6GexrDxQ7iiMHWa6f1CYMeo+sRyK5bwl9Da2yu1SWr1TUgx
CJX1YkHEVV9NRpqqba5NFLnfVy9qn0JQwjAxy/20WRElrH2JxXCbTmlPQKlVJhmz
mJV6mKqYbE+SdyMES3gD8ZMfU/t+zesXc9RCHJebZ/XIdbfJR77iMBOM5F1w1F+K
8mBf89nhd3qLMn4X38ao0o+3YIk5n/wr80J+xu7n8b1Iso83o0xnWk/vft6dHgi7
yrpbeo95weL0QCTO3sZ2u7iDitLY0MhIwIPi5HQnm6IwvcGm0XsDzvv9umfZS2Yc
BlYq572MHtkVD+pKoQ3tzCYHnE2jTAv2nnELuk2S0+yQVt/uFn7blUzvQ26h6NBs
Z4q05Gb8DfVzdutqsen4XhoKxgpn2ZuEpmQK2/liiav51D5D66U3Y4gN4hw+qzEQ
04c4+2lVmJto9T82U8DSS7qLSeDXl1k8Fau7SINz9vNW+LoP633Tx3uSMZmnur6U
dm87+fDZvy5zFDEhl1xAt40iYrWJ0u2SUiNEUXk0IBfHPymZDbbx3vXxbzYzJ7lK
7RZS8v7lin5EGFhiQNwyr0y0Wg3ylfBBAJi2xm9JYwvHCN+ZworcokrxrQw5msva
ZUNEJVuZhHdVL/oeYJsKGpLcRbzR9/WcTjFdxPrsZvK67ueZzaR1neeMIhVoadki
fswxSR8J2rdfPcFqEnfzR26Sfezlq9b28OGjsB2vc4RRoYMaKibEWw23DEUTTDGJ
LPqz3Q0/XxxPD12Z1UDPSjEXTSh2esu0d46WjMhlULwdRY/rNnRlKAVPs+q8TyTM
Y2d/fgpJwCK+5TkW9Xi8wPMOASjV04Qp1MjwFQbZbIaGApR+JdQP71sURPMdheI7
QzwCotZaELhkKZtWAqi9U0fkKVXzr7WznA9hkP54R+2co3wmfUrczvOPLdfcLr0T
vDEhF6AoKoW3h3TB6kw1xddr7Youhl6x0qdiT58dltVs1+a6KSR/4cvZPVEJMUow
XgJVT8bpm7k6F4ajtu3kzxYq1WYKqEW1j5mXrifvoTxMpLjjYu6dh0SpyTYHyW1Z
PrWcAIqMW45/31OAf5bI+hRVddgbCcrbjpMFESLS2dSX7SyLm7DnSAzTZYgSeS1p
56i7403VyR2SxxO6ztUnCqCwKtOifNBCE1Rh/kCxcd9GWVmpVqrknNQ0b3TKPs41
vSjf28xTjyKX6U0a53Zk7HLkPnRoVrstvy6OLDgt1uL//1HzzkG6LHvWcPdu27Zt
7bZt77Ztu3u3bdu2bdu2bfs759x7Z847c9+Yife/L37x1Eo9WVmVVRGVsVYuo99S
AUK0opzjI1YHRncOd6p3bE0ktYETxFAzd7KmrI9zAMRfnEfG6avGu9KMgPlWwjZs
MVrEEvoHJPYp2IGWX5kRMc8lmcZzq44Ym+LfQxGWIJy0XATYyN5ECrfvMc3ZB4Ii
56P1B/CvKG6Z2MWIZ3T5kw/rjjReAd7JUTXk7yFelGcD6wN0AwwU8HihPrEtXLcQ
UxsYB4x1oZa+lt2ioCP8dzYHzS2JH5zsojSOjFrS2UXyHAK8+u5J40d1Mk/0MtO8
8LRozpB04Sh7jreYt063OKcyZsFzVQPT16G88N/8H5ED4aFsOZylJby/oTJg7aka
9tTsIzpC17ZJfYh99t7834rnSB40TI1wOsN5xHz4fAS2c/B0E25+3iSPF9W5N7Ql
acGxWxnB1YDNvtl5z/tKhvHWwa2S+REfQCYKJN80wKOABiL16QiFo8OThSANtu4h
MvimUiTTJqKKvRd8zlHNYbSKaBO4jF1TaSSuO3VjUmG+R/8MrY4S3Qea0cJhNkMi
vkXuJcE3tEv5+IH4yfbgGpAxSG0ohweTt73YEMs6y/4A6Y6iJd48Z/Xg/Ubu5XdV
xDsATg9alHNNoDKMWuPcFLc51VTrYZtsF9M54D3lHQyVKP+wQfESGEMvn0JCjVCF
vKQLfW6X6MJJ3K7oKvOTtoMiA3ELTYTBQoZBdAPfGhEP6TkMbJCtYLzg/KZZg4MU
RtJG7LjwnjGe6YC6VemrqUP2K56QKlGivk7rNfLORYtsMk/4pBWtzedWz7qiF/sJ
uz5c44S8rt7ujN7ggGCi/0dFWHe8OkGUm/jh4YkGh0O4GTZtuT5y1I67e4rSTHYM
DSPSDnoYEbHId4/IgOoqyUFzQ2TbYGcf5inahOhTP+ZjHdEFfaYMbB1mUwo3Bfwb
rvPgc841WxzYKYsjzqqs6CmyO1RlnsaITYrgLz4bMpbQTakCd47wLIITwFZlTf4u
JzvwbfTcxZZMXhwfCeZQtn4emLhghvzpeJfT59FjJQlP4HPSHszG/rENGK9uf9vy
5TCnJpDzWRgo+0rPDOwCxquZ8gOzPVL7oA//jCRtPxHpYBZulGv4bMTvjBKJBN1A
vcRYr18u5aOFvxiu+SWjCCcVVfUKsXQlbV/F0kYRNbM2f5Q3MyFIc6W20Ngp6tO8
ktRkz+u/sV/2h6ED54E+a1frJXZIu+jiaL9F9r/rGA+pxujdATrNeqpHPdJTbuI/
SkyLgxXiiVePIxFcro8izZzw8qfDoPfa34G+/vaUcErBYqMg1XtwYXzbEqgyQtgl
T+VnEiNbsgS8eHm4ja0QpNEg6CSrzYrWt8rwzWwJ+wB/NongYMg7NNUJdk/DPy40
xFn1x+iIhMU3AalwRniF35cpjLfjlpNSWnigr1iif3sAu0MT48x9LEd3zs2iFdHK
jqMagWyQE08z4zXegS8NMqpE8wZxO5aHSpVxOGXqadQLLNq7a1d/YzIq+Ontps94
Dh+lHy2O3w3XrkraGuCci2YcYRBRMN9aQMiD5+UaD6mf8KV+PmhgaaSfXsPg/cft
eeU5EkKxkTuDkD9HLWucpy1N5Sh0t1cWdlV4HaibgyAZzM3r89PF553OPr93t6+r
Z2TaoC0m2swyrlefKCU1COOvVjQUR0YnGYT5GmK1YZ5BRQH6SmWSdF3bjop4qjZs
EO4cMf/gkF0Yt7skf8MshpxS/h4oJWVfDM9Y2KskYCEZ3ALtZntz79zmFEue6Dcj
dJft5N2LjDK/ZVfvUA1Ph39+BbhhbVFZ9shvmFyHt+rQc5IV1PASZ7iUZZi4mf5l
Rk5B+hmELKQIH87xmfm5wB5pjnBkmTI3HTIVQCDC9PEII9+MJ6dEdMDWUB3COm1h
VjL98EpIMijPYdDqo5Zge81WUBuDoc4k7yaiNJt269zTHhmHs/W1t5vVDkZjqKYx
0tLXnfdZllQyE8WBmbcEv1YZzcGW6eiVKnR4E9/s1ciseGJm6+TK7iA7zWrj6Ko9
rlqTyqMtSOzH8dvoNdKKO9L0zXpCCYlXQXgVJzaJvBNIeq8mpjqSkr3rQJy0+3J9
q2SLd7O77XjdKiUtIos81SeeLik2F5ZEREzEv9lEL3wbrXLyQXTtvP7tssDkSxrI
evH8y11c3K57MA3Z0qfMjUuf2YulDlFANsmMITJzOO1IJ4H60Oth2o8X95H2OY+M
xjvCjNGnMkPKPUl2CHgnVC4nj4qeCEf+M6IJdxw5K5pgriTB5tbDg4dgBuD7RFRn
2gxvOvaeJhtee+TxIK9M2Ow90JUZOQwVxQ5F3lhXZnbYTL0tr+AliF/l9Lphx7oA
EYx/Dnq1SbQoQeCDBy97B8efUi1IqMFDW5LxkmSc0UCIZtAttPEWUUq3jtgLge60
S84eYesomBTv4BmVmLsMSvPDpOnnHKaKbKjC8LdcB6PaVkPPdsB8ZHNusZWmRTqq
N00i9fGPwA05VtzwoklTBEaMO9cII0h1ioS7MpI/vs1MGUQGPT/i3YprOYDJC5P4
OyPlJdcnDjj1b16Hkie69UFRNlX5/EOZsAtj6fT280NkICKfmVbPTxaqC7uXOA2i
ZxrgUYNZaDTn5g1e1NWILNVkZfO311fml+Z5Uk60j57VP7gFLenW1+dXAagSMmZ6
ByQ5GfMjXUTpExYdIReSYk8/vd2XO7wTtwL3z+GrUjpcaCxDGcaMG6SjhSR2Avab
StPg3cM0SaqI6uFRQ31IofjPY74BTpxlEi3rMF45EY6ILnqC+63IqQymd1Vupg9w
B0x8r70L4By8yQEXlXx7BJPtzEKTaq8dDl/udpc1v6vxAGHChPp64qN/5PU/ewJx
MRN1HSNc6Bh/cPRwaH/xIqyzoZp7r7MlfbikPn1X7XwbeLctOZOUEpefOFEHbpJa
om0hcA5yKzQ/hHpmfuTOlZG9afub3mCYw2QGFfdGR6KRGXz0niuOPPhHDBkZxSyW
mQkh7v9gINfPQGyWSdqT+ikAJBTdHxXeIpDkwGLAkqwxtTSBUU7QGKIxtc9SO2Hy
qHZ/23dJzn6NEjRdjvjq5zqoV6WlCvH5oJ1RT8Io7bRB4UXJoKYOAieFH8dX6piE
oBdztoDszWrwwHvIzqRJ0DDLYRKxMIVRWaSi4fQ4wOjupZomtyuJ5qwycwdRMve2
anIbzYDKSHXLM8Uyb7tFVax1Zk4imExixMlobDI1kZb4fZ3kUvkm4ZL/HtZD+bzo
ywn03I43shLPkPBaH7HMGFlnKeEyYi0qRysV3cJWx7mK+wryWlx3++vFCmp8iirb
lIb1sDQXYpeLpRmAzsXZ1WrrlStpOSUSC6mRehG7izg9zlLSmfkdb1Xf2ZkhU0jp
IM0OZHKEMDvNqPKxNBW1QxNDD+/KUBseJX9UbqLaQK5IHtkCGXtwR07ZQ2Jq4HeV
nI5umGtEe8SEQQEEEUtZaVQNg4F1StA6/rLHOHlhPKSXZOaDFlnmueaZ5jlyxpU4
jpP4q5MWr8mD5bLp+WHSkkOuCo1TnOw6eZWYuYX5MN9UU5DMWpmkRrvAJ2M6oL9i
mnQ7Yf7oAPyoJHR3SiqOdkozYXRjEGElny5jgJKkNAxppnNj3BItZkVFhtKVbQGU
c/A8GjioX93FNIxSABVVOeUuCuhHK2OikbBMMydpIlF5nV+VVIC318eIbnxMKt43
/mAeOFO2mdfRyR7Z1feo0eQfr+icjbJ3jOqigo9aP7Ek5Pt8wDBehKUPA4/rM06y
kXKrU2RkbXvSxnxC4vVk2jI9y5eFRivVLyYnO7ccShuSgjrwNTkoK9v4b6XjxhSi
phCDxtb+pd2WQaf4d4SnkNvipOw2b5vXzPMGT3UXjkvHNxP7tYOG0dN6q3qcyKqQ
2v4SqVpl9jLNPhGzfLd0x2K3do9sq2qDEeeRXNnD+qMxaIc3v0lcmUzDPfarjBqR
yaWaU5IMdJgUwXSWwBJdEsqXkQLtiUXJlxnCvJFzJfLpQh4F8z2EeBtrSunJESVP
ZxcRSfu3owhta/ZlDhNmR2dmIfPhqaasgYrITJhAPrIku16XRgWKnsFy8aY6iT0/
MhWoXscQpH28ItrsdbvxJIs01UJFj5OL8+J9PIXhE6rr2ugxNOqN141ZsmpNjbd8
VdsupFKB++e7xAb4OothCZb9pDJVmlrhgxACfY2LXxdhhtxlXEXfUtXXE6dTeooB
NXYS7ivcGiVsUzLVLrxFy+uvVvkJcb2LbCzC4iwGlNBTfUqKv2HnBBYtSTGeD2ew
w2WPp6xLZ5ETomvONSczZmvTuntSdmwanBPgYIjSZ/PSOA5gBYOtEg0Sy4kkrQO/
tRh4+NYL7MksIzchAsukzFNWcL/zqnxGw2/p9qoHmhSeUyobvBXftZp1OvXX41VF
bNlz+3fHPvHrM649r+pYpnnu9+bb6bc4ItjAtWrjqd86CfTFPYtYi5R4i3w2HmqM
shuWbX/5rDCn5M6vnko5l26YpqTXTzuK8STcMvVbDG1jbDF6F3maMxql1s8pV8Q5
sixishbjSfJm0RY4VNIfL5gzL0KMXclHHilpOJhrUEo6rZKjw7Yy9TvGRdpuWdr8
ym8NFMekFFdQTRJRZpKSwBMKg4mOLWTFGuDCL1rR1Nxwo4C8nZ17KEBMPKKeVEuv
pxKdYHh3LBvFDuoZphEIkexIpFpclU8B9B62dCkFeVJPTjMYgjIeGbxE6RaIXIi6
HdfWFzzu0dvPBI4X6R02u/hxrrYC92UK4PdDgwVPamJU3JHPJqWI5Nyzce3Q+oC4
mbBS/b6UsiBhDEv6cLK4DD7JGRCbotLXt40HuSx3SbyGpVKrgEWoNczD3xeyal/o
hr3lR8EtS86IzBO7k3IWD/z3TRSsuY9DwtoBg/LKGo+XuFyL3a0yC0vCFJ3Xxyma
8xdCG3zYN7X3QxIO02ljetNEii+UxxA3wRuXY/Z1CFZwCO5S55J5ifLjpPtSZfRZ
8CPZA945SXSXdLfwdjC0eAyKZfIPZi0SMtspVDEqVhW1OJTZHuQKqhG+xfe7vjwN
1XSl15mXodFGr4rGcpEYXYlbWaai5eC5mkiFALASTm9IF+HgEnTe70FLhptBzpT3
S9uQpLxgioNrQSGxD7sew0oUV6zmFsm+MF2EuYMc70TPHtuJm7Sv5CAX6CAQgfQe
qTDJbXKd3Hb+JNjTbRTRwfs9sjrHVvtW60TPcNfml4CXgoeWj5a7lqkdBCt7MWhx
YftYhQIqFpZQ6TjAJo1opHZ+xhMQNalYodR2OAoKjkF8dGiKPfx2mckYCadF3EBK
KmlqEr52iEG42pD1X++Zt5Uh0etW7MuHfmdq9PoVLh2t6JZTZ1ZtGtS8S4uaK04B
AxYMnXRSAgg815Upr+e191J7dbfyH4oV63ZkLOG0obxC1yHdCN8HrKeF98cnMLfp
w13C3y3cX1xpX/asaNAIEIyUBw4ULJIVGmF7zjcBD7XEbgWsZuELwdAQgn7r/QEA
h2Vlk5h24d+MFvv3A+9+7HHabx0IVlZDl9v5NYT8HE4hyD82w5pySoccV/WgofS0
VlCelutBtfzLt2weIAsDoR6sAjcD2yGzY58pPSLoRujQ8wPJIEUhFcX1zPSYIKNQ
ujTI0cow1HbVC9obBcRvQyVEmvyx1P37uCFYRJWoVSzomaio4Jn5HieSfk+W0Zaa
1s81yhXwL5WkMTECraqNaKQLr9eZot7BHoH94LdONAgAZlgDrO9KUmxE/IT1YylZ
IljAPwDp53caI9md27ndaefvxX4Abvf/AeHub9QrJAfdBvWVoWTZgpYG0eOeaYDR
GLGY4S/928K1qjwRabLDoO8Vr/luo5gIPOb4keBKZEYujS7zHUFmMr3HCUEIG/Zu
U3opb01kOD+9tMbAdbHfKLK9eq2mHZ/Tm5Lzp83ZGcStIntjolO55F7xQM/UNZ1m
g+nuXPkZHk54TaGsdElq6/7uT4NIWWoK647P2tr7lPrMX5IIE6n+FwpaEmlMVqHW
jTIDcFD0GknuWp2vDcJxrSH1lRJl4qxFBbqcBsw7+GVsdJ4AvOZCJBi0tCyi1tot
y4vH+plVTLRPteFt0BSABpTJ1aOGB9jGfG8RD9BcP5sdNIvxq+3Ee4mJ7GTGZ4gT
NdHRnAXwDmztblSkxdiptSIGZA8ny7MaeYAFCS5d6x9vW3GT7j/GRiebh/dwGW4O
ejHKbb5hmy3ua4e5o2LTdhC486Y8s7PmvNKezNpemJ66BiytRytNEMb3GgajQs4R
nko+Sq4Q9nO+mi+2C3lPfCy4SDLjttnUns68R71JusveS+XXctZpt6uQcjRm+pDJ
0GK1lC4WJUQ0jE1Ix6UeY6tb6bWOj246RdZXdmsanPVMll1+qejpXNuGNrD4tdpI
Q63TPxNvyny0uvl6XpFHXZ/fewxlfVDBDPt8zX7eynqUPO+yWOC6m06mBatdbSpd
hX5f7HcP6XRy116Xer2/ZW00R0e7iH6o3yJELP/AO7Jz6jtoSDWbQEUtk140251w
10syU1H3OuJlfAw/HETzSncY42W8tUBK9aBjEN/tijgTE++1KpwvHj8J2NankZJm
AaNGnUwVPyXeNB3N1Ep3XGw7iljiO6Qha+XtDy4/daVpPtNsbKWrl9B+VNYJarB3
OjYIage1YR/ZTKUT7fQfi/d+uSQY2zsOVr9KD6dw3mg3X13iTNbxQitqchP+4N0z
uHW4bcZCi8xEDQJ98nHRvb7Skhux+jmjbGawXYzKRSjvRan1O38JVJy8sbGgSuay
IRS0c/WEoe49AoKonGWKhXEff70ElRLyQUO3Lvf3Cc0bo1ex9oKJZe1lXW1hE00T
UBMS66wxAWBYvHpuWt/NfT1PxuLG0hpBWqADQZSFlo78sUPlFTtZaHj685q8qQuL
dVAredsNwkZo9A7KR39LricjKd5ZZkKA4ixqe+KTXWSWnbSXxkGYJF0qR7cSNJe9
tNcgGdJZVvg3igG1P48G/RDhUxgHtYZRN+1JA8dn9BpuIy+iZ4lY9QrW5YTzCnPC
G9O2x9e01LH9ocA84bzEvCBF9MrTESxGIkd3mipeC4eLsG66Vfrn1Mb63YOyL2gr
g1GTWVXrLBu36ugkFGhZBEpX2Aakj3AWIRZx+dYxI0hka2urNwmdKo22Scest+Ib
TCBW2JVEd+fJ7UNwGOwR7kN626nXVLtWNIpXN7k6NacX7OIxHOcC9QfoKP+2k9ww
cWY1+3eXZ1J1W13/K8bHTDGHnlN6uJkaAw1N0SB7FyNUo1QeTxec3XiFfA3xM0kn
hdRGLhZY68h0/545WYcdFKIfbtahs2sCcbNCo0CRUhEs5kjlA8sb6lyIA8ilbVZ/
MzAZEpNnawX+pKEhCIbk7WBDLX4hu78xcxFFo0Hli8ngkCdBg7MRbOzGAB0YZJht
gPSc5geHOT5ZdLEoKJebHs3lkajmhzklUqyFVANjM8Oz/Lx/K+/Up3TVxThLmhCD
f/Q+iGuXIeKzL1gGSWNOWnxJocN9f0bZ6so7OC2wkmcVyropG7fgrduEnxIWLDV2
6hEAWeEZNuFc4R5G7C3BTyWly5QDJflqxcDjUyWqsj4Zbz+XstdA11zt+vl8nCTh
4zxolKX1DP50JkQMS88brY9fFdxkdnvmlxzjcNNck58qJo8t9eVuZCttbTcN9iZJ
eMk+VWeKlo1HPzo8/UOjYVPLIp0NWKKHIhZjZsA+KRbTPMKzhYXEVC3UeVz07IiH
VNAC5nYXJp75Ln8Ny07IBI90Z+xoopHnYzSxjFeXjzUXT4fx+hweuWx5HLOB3MpW
SmosJbnV/3g4FBtfjd7GzS/MfQ2HrJPoPHW2mG8YjH7EbnUZHjCb54b1kXFfKluV
dtn6PidXiSW75Vmn8ELz6Ds3z012Ld2WM82K4+Bk0VfZOB0g+TkXOp9kXCyDVa+Y
nKMKHTY7OGhFOsVjskDR4Au936UXE8aATa/HCCbG0S3c9zqdkkfHkoCoIJHcJ/Fb
kMYWArDYSt690iv587eWab3Luscl2YXJBWKtxoW2R6rWwOzzUJedy+1bkSnKxYDS
SiiBviy0bNTCxC6btImGBbXJ5kZDhHmz7E+3jAAsvUzDoX4raOlnjcs0qUxN05ao
kpo3KlLlA43Vot0EXRXbJovVyWSrMpnZbXeqSXggottADUG11Gtk6T8WNbcE7p4H
kyZ76wTZHrpGqDtQlf5cpRzVNdpWXr8QH+o0qvRYVD6Gpt3DKIx5lMpT9vCDHNs3
c5LnL3wfHPtgDMsE7xGxmX1ZvnldIdxxVJ0muWdmmTjK3ts8eqrXaF9AR2mO8tYz
HmDV40X3AEBPJWHb6+JEA8eLsS9bjlrHS9aZup2PHoUXOi1m62y4n+nPw9tFVGQy
23eJcYZiCWPFtjLFbeoANnQEXn1UX7GqQLnLEicrC7bGtBIrFIiZBCNUYHeH2wJf
YKMGf+sAkLUsjxubim3w7Y3XfCp/2NQKKslbneoFwlGBmKgGWmdi5Cm1gsMGvkz/
hgt/3wnuDmU1KTFbgAJ+7Etghrrpo/nRT4ok/xjSHayTrMg6sqZTYLET9X1oLM19
lIFj1WhbnNcIpYgLWVj4erKLy8HCQ3nVP3rVfCIz9z38AWFYdHY89dWyTdfQu26C
O3k5/Cz66rN8OoyI5/LW2I/eLSjcEw8et01m8P1w1I0mclmA233fgrwdRdf/vNr6
MsQRPTFcrYW6q0qvuuNhD9YVv82kDUTC+pDB+4HGVmD35RcYOZnbds65Vk2T2vW0
huKAmnfSDaCN9CT4b6St/3IQYmdnZf0Pjeh/94f6X2hEpRXEBeWE/qvi8L9oRP+x
f5tOyUbZ2uwvKR7jPx2I/qYMZfqbMvTPzH8IQ1lZ2f5PQeS/9lL+XQX4T/Oo/0n2
pxXDYNOPDx/o4j0YOQrvy+QoIKZcJoYbp2T3DkSfQVPwwocO9/UMeFakEIzleu11
89PbnFfdHuLF5KGoH9ifCMvuSZIZnDsq6pcD8LnUmowyUzxshEmLxnGAoqQ/GAUG
QLeJoYxd4Gb7I/dVuHM4an4+gvN2cRXlJmIfEFkBsB8FCGqw56ZwcHkWvKswXOVk
l+Q5gaJPaDUL/oFIqqk3JYaNHeya7gIzYbwAuRsPVZDhtxrWDJzG3Qq5mgizTd6R
T6ZfEl0XZSrJ0EbRVS4qDQj2roVyb/CdbiaZTZMt2r+Z6H/tlGdkZP6Psr87Qv1P
gtJ/P71/CUqZ//+mJ2X6U177dz3pXwX/5Uli+qcX2L/0pOwMf1zT//hcZapDuSot
Nmp7ZDNFQ6cajjjEwU+PQjP1ShESEAfwEZvcKUjFAvhO5SxAwIMIQyAK1d4pIPtH
75wvrUkMQJKTkzGFQEQjHq5Nr6nnNaF6NBaFWXnJdaI2JgscfXnIAtR6P3s/Z42u
WVx2LnU/r1nwTq1icVhrzoqMNiQhM6Jqbq/J3M0q12yAsDmdhHq6M8RaXS1eLmtm
jxxbE9dpukzGaVTJHDidJM7kNS0FhnJl/siuAQcJ5aICw+s8eYtKR3K7BG6xGJ0D
6XfXEt2y8zqf7L+c5xw5Z2vQ3gaNGrYgxJjvcnQLnoh7hr3Ze8JaD7pUCzE9wFIw
WcCKE+2ygfcvmENTkn6OT/zZako9SVqXdUAXC+KW23zzvtxdgNdB2fgm6RGlJdDs
LZdJF9Bv/g5EJpvFcUnoQWoZX9ApB2CSzujIvth6cjAaX65ZJ0Q+xWMuO76Wo7gq
3M5vil4KewZKMDNWlTKpZvzgV2wkhjsJmfA4+J6oNSu+b+Q2KmhkAUfOeUqJGb2X
Obua52oyUYJ2xGmwT0b2smIXJ3oJ0UiTLwV19IMVdYDC6VcarDevKdQJ/AhksPOc
R85PMXlnco38SExKb0iUQlCmhOIZYaBTBDnsgp734pnk4pP6XUQUbW4MSQnUSV4K
ebexeL5CQiffJT9n/6jf1A3Ip6h/NOVbg9xU2RtTOQwtkXQAwRnbbwAdSMRTpDQo
yH3CG9RkZI0eUpgfj8iRdEtJ48+QMsJ89P9Ztgm9YrxHbxOWFBFPYBnGrjCmWbMN
XMzWGyttWodFEe8GFFezjSw5jTi1jSuNQ2HXLCI5jiQwcUhrIYJsTVrUQMEWk8xs
xPICsgPVc997TAU1SvHJrF9aVddoWg16xCJBqgXuJDeax3jjTpJ8V7AaZiqRl4ky
yyBsdGKXuZdEWhoWP6Znrmo5yyi9XR3iZkGOZSBOFOCDlV81Uec/BjooglGjDlVu
SfOYs9eDzmkoq64vPlVXpVs352fdhE+N6WkYUicGcxhETgkZpYSZIJ8AsukkwWPk
x0aJJtal5eaHGfttNsErcb5dzUUuDxciMfuRMLCQhuhQlPAIFp9AMZM25oX++91w
X4vhe4AR8i2RQQlyL+QWU8wCvzVBRiwTvVEmQolMpAxJxkn/Kdaejdml37iiLmwt
MXEBZO2HmlT5BPkPSlRBY8eHlDoeElE7IvqqT3ASQTNragph16OookJJJhdq9sKK
o5y6jCL/n20bCOPOyTSb1cijVcjDG24/ZnAHHblLDMmCQFmMQgnYSyIE8IV07xKh
8lLTMBZi0JDUiIZ0DoEIxT6kvzgZNj7A7/y+zVO6WSd84nduvXlifiF/wPSC+ee/
BJdcUH7RWvkOvHp7p0jI9+K5VqN7fbFe52Pe5I/QAV8D4cF10anfhC2Nexjo3nzW
ljBJOibhRYEOwUKl2fwamcJCnasb8+P5QvSJFckN2/aPBvWJfY4H+4BvwerIdpmh
2pm+h0yD7jJJ+ebkxS/66eN7XRi6U2saZtsbsQa8jtMI+aSZgNh6VLsG+IW9Ld5K
78V6Nh1oLzrBqy65Gf2G7hPmInTf2JDjz9srcAEc0XZaspMw1CxCJUyiNQvUtjTc
7pq8W8XsKRJaK03xmJiUYK3omK2dp3q2/pATvh0MYwg1/HaYHqMSN8XgwQdaEr6N
o0w1uWP2IP4QPq9esKkQhm+VjEjgJC5uypusALPNN8+P7VQBWglYCVLZj5UfXv1j
E/KN4IRVbQ7QDMSUxDneGX/N1xQsT4vwL8AJcQ6Fp2kGmqVFQMAn5BP6HSImBBwC
Dv9HBpHgIxIAIfZPhaivKWieGuFfgBFiHPpPoP/9VxD3AfwVMeBAf4QgoYQvOUge
cohC6D8AX4LknyAA9lckg+P8FVqEjvh/RKgt4O6PPpAASUJNvpbff2TiwNHgafE1
ERnAB/Dh/fmgJf4BPxjIEf6CEdUncqDeZEAMAEOAGECIfwAfKPE/IKid9gcBqRRv
zWfPE9A6Xe1fAGfZPfDUX4e34h3K4kv/Z5D0Af8VCeBIf4QiYZvvCWgeVoh16D8A
v43kXwAVQovf9vsk7h/wI0+S8J/wNS3Yv1wbg3Ot3pWkRf6K+aZ0t+iodLdeInqH
N8c6alP4GFedJzGqGqdjD914gFOwqqZULgVjrAeVAtsG2YDcANKA5QhuGD+HIHbt
u9fRd1NS2nT6x3p+s0mQddx6PSeyWL1Yo/mXiwacGk17pb9KFdh9i+JV/or6ifcO
eiX/GwY4HUIBi0LZ7qFpM/a7JYj3YccGupvmd0UIDoV+cNjKFaGzDwIU6a1kCqUL
RyYl+48eAZE6nzBnZKVTugy/zNOuzmxjC/lv4MpkHLEaqEiAumw/d751vnP+xBxG
OYgRsDm+xC/CHoEgk5YxoJ3AnB8xsGUFFdSeZEWRDVheG6NNg9rOCnGmxbbQtu/5
gYW6nbN9p7p0QlDHFr3ETcmQg6oIHrjh5mQvVyXO0GcmSJaqSuvRG1ElKrCsdOqu
CCsos33LDTnxk6TSKDNJejxQQLR3TPlr2CmTIeZofiB5gd56WgFBnjPaIXRnBjsx
JO6OeSQ2SunQFrJK5YhLzpTIQNMVSoSb9XyobiSgwTznBgSJGEQN+2v+a8U3z0jA
qPP7Vp2qIJx750YO0MHOOQd26GCNpjMEF7feJxhHRTvTFuueLhbRubRH6+XcZVoF
m6pzFqK3nTfv1qtCShrVz3eZIm1NKlSLHBJRZuON4w0qVkWs08F3Jc6Fznwt4nqo
e5zP5pMltpTuu+HmyS87UJqWC9az0JVy5XNwIS9zQrPMxvajgAiAlJIN2hEvqK8z
7krpWqvjIpjCTdNWWk1Ulo1No6zVkwbtPUk24zXFq1pPyB51m3rN65XOi1OXhtMn
kXCYgHYyIzVj+37KKBjKY7S0hsRioUycxeMjUqpprvMV6kuGT3Q5Ra9tr4vUNnQO
EykW6h2NE1IWeUVJ6g76OaXLqNlmKqBpUhr3KLm4Q1dQ+QsHWB4YjQHuaprIViNM
82c5BTDPR48IBuxYVzDBo5lOipHtpFZjI2VDb9dihHX0Cng/n1u6KY7So5knIVOn
D4InGQkG7vulj9rU3hJzebLGMmEevbiEa2xLZK2OS2GYhFvXtPGCVhnMglYzfjBR
IkMbP6nPBWI8xavrBTFIrLwCBmv56tY4/Bylu/yALW5QTK05Zy9jW3g+EdPdJ+Kg
tIp6O8FiTWHoWXp+ie0ZK6+PqdEnqKbFaZdTKTCjp+D/gRR0za0WO2RocLTiQNql
Fx9WT4pSR0OyG10hQlxCajCBkR7BUMOONvKdvaCCpVtrR6WCZ216zyrUAWOVE9J6
WiRs7XDpqXWt1ilA7qh4K3pE94vY1SK9tW9dxabqaemce5/4SuOsX4B7SmNbMBhL
XYA7OLLp7eSngaZ/cyMPdnkpLMi0xflVvVVgWXd+pbm8mliDMpHdtjkV+QJLXmWO
KRX5WhmDuaEGTPhghw3s40opq2awHQrXkOhP+mAiN5DdNWrVd2SG3HdStBbV40vF
0MscBN+a1ItKlkz8XEqIJOBAyHOpEgW5DI4K++oszZjm6Et0lVY5rjkNSRNQP+Cu
0YqUWUPUiTQsRMVBZni/a8z6w71YczYW6qphvDucOI4kl4xSeVvEpO83R8/lev3B
sEMcMRXgJCSWVOH6tAkIpp3QyaAiwke9BC3HIil5QzVZBQVBmw68MYAMXZw8dgKQ
XwAIzNiGJFjXTc7rLT+FHQfs78eTcAdc+jHho/o9jZBVIQQaGY9udxuA42tRIKL2
y0ZEHaDGZgQqEOV6vSCsI6h9Zw7PKU/LLp6ckh1V1XM322EC11hvKSOjNovkRHVf
U3X5LsCJVmwlG56FHJW6LFs0wH35ftZkjLpm1vIOG7HXHf8I5xkzaa3QHtAQQS+F
R3DMHXQlVtchsN8TB0cM/ykJL6GXODJKGJvhEdOvPMuDSWLGGanw+dNA/mMFA1Md
m5fU0e8+ujZ+H1R85gapUOvBgzXoFNmAjCL9q9d+5Wda2OoryxRS+ykzd8S+FxR3
35wps0x+vRmloh5SjseKwW36Ht7s4AOAVWR3z9Jwtu+X9xvIJxDuB4LNhEQb9lN9
aSSPAk+B7cewYXG7KbB0USp1uPopzUdXAB7cnOCDw1P/C++MOWilqNcicoHux+AL
BWWexwLt+GzBsRnTpcnSi9+LvieBW0k82J7N4DYRb+Cp+BpI9o8Knc4EyBOONT5e
ffYxOnxuKd58gqSJYwqnJEFTM8rJXCxTEqc5pgdKSYPJpPyk6f3moW8/tRQZg515
/bcQ5RqzDwoWdh6SL7A2v7cTlAfVj7dFqoXLJKog8z3eyO6A+WeoiV7YGjQao6R3
mepwXgQf2OdEb8zgEM0o56P5ywfCz7iv+K4diz2LE4W0wCQd41cpE2+hD5qsftX7
xbF0RwR3TritqhwaQ4WEp1lvjpCVDzCYuWBq/8Pa8RXPplSv3vhXAW8hN6nV/A8V
o7P5kOZkzxB5MG5hj9PlB0wcPdQFnbG01UZLine2J0XWEekvim/1xvLm8m8lWY0P
QX/B7wgd3G9EkyvNN9zKPJaQy3jkfO4HrDcca5JvGR0GtPQR1FqylFHQ1WKuUI8X
x60pvN7TV7VDe6P6uzz13KWy5dLqUp+aDbNVQ4tGmMw11oedmXrB6mGdkO6o1ni/
t8+WHjWpc3qqrDzBB1Jzn/StwufBD/7P+FXNJ6CGugwrQ7hak9XxC6cnBvdQOtgP
Lk/GatFyydfIkHn3L3wf8Eo8BDaclgLXZJ++biXqMNHUHGrFLDmpQlUMua+KNqVu
91gOmcyqKeV99FTGcZIktSScpMykZOpsjfJKqMrLpe61pfWrmj/exdlTXtjZmTwC
B/KgVothKfVAMS6ZFmAh6qf58pATm51b/Mwe8oO6Hyrg3eW/iCz051eeVxMrIitN
XGrBVqJXDCypPGC5+fBaYLrAXGOm9yo7Ird7r/ee92gN4LaHfUa3+wLH7FyzKl0T
fzPKpJZNKFfJWfPhcdgmuoARtqu5ibDndZR+CL+W22PnJ1Vq51TJqZZGl60vcp+d
J12rVQ3blB/GFG7ftR0mHCYkajhU5lcYVC6ru/zablazQrKcbGq36m783NyaEqkl
dK0yuMr2coVd2gH5wMjKrdIbls+IVhSldMft+TnRV/bCuUguiJ6MnBtsk8olKo1m
W56b9gJ/ofte6tcpZVGh2RucyyEm/wSLpwR3H37qQt1nv3A5BpOk6gZ4OWC9MAh3
81mR9HRjzhP8LUTwRLAVhqfftS0FV3u+Yr82GlUvfsGqMro0Y+OWxBi+yb94W6lp
JG5J+Z6xA1ipiDYHN+W8ywmiErj+Gh2Eq5p5BlfL+zhHhD6r9YDrkSbDKPmheGEN
6ZyvcsH4rNtlg1/7x5KaQ8P/McUfxzD0EfxST2UjV1W9uKT8xOGN7m2kDo6pDLX9
VCcItTy6HG+Aap/kl94vowagc2sELT+UewLjUf4D4SuJCkewJ0RNHgWmycHDVauV
R9bhyRfZveZhm1C6Qh1AjziU+vgKLKo8tBDzDY9OP+U71vUAJ9dRF+drHxpsdbHP
BwYHJjyqfvef1q2jc0ZuQ3XDdw7jFkt2IU84D+jGD+8pk7APuoCdMnjzyxNRtaO5
+pTB3Ui7HiFJNzX2MWe/aBsNJqN6ebQ5N+IPS4y4856RKo79f2FlG2S3xHlHvTNN
1c3mg5huR7mnwR+Xm7Jb9YNvTemTq4VotYfw8HcrrghpwiHH+6bh9lYtwmVv5fIS
rdmdqjI8Bbqzgjl5SW8XB5rq/WCpx43o0S7rm1Kv/sC8xZ3UVBrnujDpEa4RULR9
1TJ6/W1HidvGxRNLpwK7h4Mk6sa2pe3myKABSqcwGz2fMFqkODgj9XJDqqgU30nQ
6ZrQPHitoAJLk6szO4+OJNg5qiJrCKwRkUaBpiqbpcRSW5fn6bnaMleLlogMFkaL
rXjyHPnkDul46fch79bKfnVRMRHx0BBbtYBscgcuGrdp3FgCaaK0sWMVcVLEq1/m
fV2YnBTS0YwCUrlNHpLCEYY53czg5GsReMYlCZSk6jM+J/YL04QmVbK66CxOv7O3
PL160eNRm9UFVAbpqPNxq8YaN/mOmcJFfBWiNQcAoLO3s0SbTU3Ihh7LRn1hFb6U
jsKYmwjbaauNVVSc4fGnCB824OjEU9NzzQWFFCRXu54CHFk7khazQ+cjjHEUmpxS
/gumOlraJJMAzKMbCMhunH78Is3NFJu45ydoAcTiqLGURaZZ/ORJ+K2TxRxpZ3FL
932WNtpkNHAcmjtakzYGY6LKwqxuFHTOpjuTxyLDcys15bDLndb2whFFJszVYBv9
1UWHJNu7SUCX7yQVPEtAfwnQryuLCEfWvFMPegXpPTGjO5jdmFHWHHFsVM861dAv
EhnGrpHGttSDykfasw5Wv9zRS2azIxqQ2Q3NfDoesVYYdxPJEQ3dpQO3/srHfHfG
EocjmlpswWl2HUWFjX3MVHBLWYmzmpiLj6KZoBwyR4W4IwHzNDfWOqmXk8ywaztF
nZz++Bg0rzTyuKbQhVZdQlAA2RRAI9qBEGrW+DPCzCrxPGwtw6LB47uzTB1E49/P
L8XHyQ2wyb+8qujEyQe52DkXpZbcRViBAOtLxKQQNHCGkHlkYl/D4vbS3V+Bbdqh
XIiQbOELjAeaWLjMqPt05PBBXRWr+e9jGZanwEnuOCanw+MYUI9JcBEwoXUF4tk1
TJeyZjMCRTtSRj0GOkGM0py/V7uVVFXc+/PEScff8BasILzmqW2QZNjcBU0MXZdY
GzOSJU+E+RDYToJImDppCw7sEiBCjykUwsXdDjfqSUcC4qQXg3nLbTHLBXsLEkCk
bJi1YiWRzFbk5eg7DL9Q5i3qfYAWsL41c4g5wbCuAtkp6C9M+iwc7txe7zskr5TS
1Gv2b4qSWjMzo+4dI1fGOTixOt0NTArqG9m6nLtUXdw431+cuzrrOwHb5fT5PPbf
WQ9TI58DZhOFLRGLaIrXcOnWf+YP62LZeV72o8R31ZIgH0YsC5v37yJ6BjDVTeSO
vzAVgEf1GtiDQ+gsqcDvvmft0mS5ktaU3262QGFY1v0E2QXLjDR/tmU1bHy8wyTK
pD6LEYBN5xggH7ZuhLY7BLhXROSx3DyAbekq49Hyaj0XemyYX1QCWnWCHG2Z84sF
IfISs0USKXYs/E7Qy/WJq3qCiqYN/1b77LsjRakH3N/riu189Rj+yPvVWLjOWD9f
z7Tpyyq5ngJ7PjkVxWBD1n0oDctpXDzxFNAZHlct016ke5tiEaZ6tJ36LcZvn4aW
bFML1WDfG9mUsXGHkYWxhcZN575olGW05ZTltMXr9nXQCIotPDWbNbtFadLaPDp7
UPG84Fbt1ORmY1d1t3F58WDpYOlydVNAxh6XoRK9mL4/YmfsZolb3V9ad8FuTSRK
p3NmLLmpsbHRGd0sr92xLTZVOXf3S1s8SCCZMSM8srTV3Y2CydY2pIZ2KfLlYX9+
x6YsVuOwTy2/gHz0U40r3QjrdPVwVbpJwOdKWF2vedzRThXp3bIgyofrIEHxboja
BeA2I9ijGZeRNKgYh5fh+uWwqroHiA23OG1+/AfZEUgUyUukr4HZqvL9EU07g90Z
KdxebDIvyC06+hGe0Hw5FzgcuoQPhjRSKyARS+VYabEyO3FhWF03JsUouYMK+4bf
XPlUZixBoEdFRxWJoaGMvZS9iisl/HDpFIdsvkv6vlm0/1HgcOJch5GldhsdlYXn
akCYvU/uh3KCbAq9tmo9jXf3skG9sbGhSama66SGcrVMMgO3y7jWs03Xi8ehl0/4
RuNRfbGd1EgTDI5092WTk+IwqqzhUSzK88DpzMywoE2ti6jVlut4xF2pmxmadJbD
uMNlcPXXnvJxHQhKVpn99kp5NW+L2SPn8m6c+oSNE9q276tRYWiQdWesjZJdigqv
/NWBS53s0g7TLbdClZ9W1GUvSagpXbozx/EAxLOZ1K5ZFdLwcGJR9HQVdjUyOR71
qev3yAzFeDocL9cD6+B+aKtF+sRnD1K93iFzrXCC2U90rPTYWvDm1/13V/avcoAr
k5oqRCgabbFuWbFtCTt5YaQT2ZZYNLh8ZnkqXLu0IjOm4iWWZTA/NlprLQWFdsfR
PjMauU82NGmcif/O0vzFOfyZYGVgp/8POu7v5MT/mo5TVROUkhH+B1/zb5g4pn/a
if6/uLX8ybT8X91a/h5/eqD8p1/K/+L3X3r6k/D7r33+q/TnH32zMTLis/3V/z9r
/vJb+bOenZn534zqP85E/5/pv/m5/OXzQ/8X/tn7/zmuP6/lz//92f5fffx5fvq/
Un+nJf+6tf99vv49rfbfpum/WbTga9CwsrLg0zAxsvyLUqNn1YL8f6DU8P9GqbH/
J6MG+X9h1H4y/51QY2b4T0LtH+P4O6H2D9Ohv92Dv9sU/YtQ+6dB0L8INUYWBpb/
hUFLZCeELrLwGpu28ib3vMPzhgljphQtIx8+MR9+3BF4zoiXWIxYy0GSopAwBO7v
EL8r93O/YcosaPEegDbDxEUUo10tLU0nFGdhIy35JSM1VbGj7/I0iJ2ud69tH1Ll
T0cnJxcn7mdFWVkV6nZv1tp4EUIEg6O8U8mQFyFDy630VvvArFWXAHAG6Rbn0Qzh
VK9rAYEEm2Pqjtu1Ce+GgJjc5qlMbi8V4+yM4aZnTWbDJzOQJhAHtMpfiatwsoPO
732DTPXDRKI1vGazD8qr7/G8ejrd1m95q6lfTI5d3Ya3dyipn6frtVqNhqsXlj4c
qfDr1QMMBiEETTCqGAE/KEm2483vgBmQRJgVREgRCKcTHUL8vLw19dKvv73nV82q
znzK5JUz3haOBwuxXRW16w6HcS4dmPPWai0QPl8BM0xwZxjCoJdGojm9O8SRaD56
AmVPcRn5Kc1oIQejO0idCIblUxYKKVKRtolQJNmlP/dFyhNMn17GtYDaxTmqfpGa
4zzqJ+CQv8sbMkqPDcrDPGImiPyVj8pJAeefjD4jD5dvysMWZRBnV6gQj7YACi+k
n4LZd9NSiPEMjhOJFcN2whgzTTAjT/+jWYoQ71YduhHMmHfCPDmpvlhv0buH3kVv
UftgkdtXn30tJ3c9Z6P2BauOcvJqFHb6Kmwr13ylTpHGdJiUwzN/qpXd8sSS4q+t
kHA2DZxDKyAgBQA4jJ6e5JyiCwA7eYk9w/QDMgpkUr2SvMEYrkkQ4UONZ0nGXMR4
8lThvVPWUFb2jUOgSurJLiJcRJPtOsVUogul+nmtLqcdlAs6Q7Axb+TQT5Bt3nre
eJaLn9kOCyzkGvJP+dgir7CDA1H7HtDb0ysmA4M8JEbkLOTzck15F6J/1EzwCFfW
8tqFIbAEW8ihvyOZR3r5Db8BN4Z7QZ8YPNm1RXZuLxSXeUYDxBmp4WungPjNUu9A
JDTXbbN9tkORl4GngApfxt+NAsxJjtlQXmDYJApIL97vVV7cG3NjbLPWgL3/LpBD
F7kDvPoAnJUfymHOoeZnAOSAPCE3E1r1q4MhCfxBKViZe3KBP+ZBLioOhwxkBB02
FsW8y1p5Yas4m/PSA/CO45EOzLAfvGIz+MT9lLTSNe5N1HStmx6+D7aqId1qxzgT
tA98bLpivpK029Lnvam5E1oM1rbqPaH7x9RJwPxz8qQsecdt0lCedwjfR/hvbDNY
YrvDLusPKBLR7/dFZnXhc6bK87yTAQUalbfVByLywPB6aavDrjrx4P84rgCHqAqz
VYIMlOcFUgHelpkuefJ1UKYxwvxRKSILEFCW+Lm36Lfnmj0LVcIzM2jdQ735W60N
sN4RKHYV5kPyC+YW0ySaJTFJfwiXJU5LYj/Sw2zfosEO28ozjHWqKLJ5bqixoTaN
VVsQK76BQQTLwSyfH+t5tislTMS84cOweQx8dsi/4dZorSWDFXV2SGDtFx+W09qw
qZGbdLL/eU0pSvqRb8bpL+17IyB8L01qOKY0sLRpf6mV6Dd6CfULjJOCYxOOYIdX
1u7WBtL67U6d1z3f/tX0n7fSObvS9tDCoH5bwBidoeEdoeOtcss5UoJmgq+wJJH6
AteeXMPG8u1yybkLf5Sq+d/hhIlDH3NCB8YOlrzCu4T4JuZW8WNMPq+kvxztpw/f
RWDTFJE07s4doTsdzs22nmouBQP/gJ/AbT6zLoza/Lb/uKEDq4VuqPFYNY4DErIc
tWZj++Qk25LAs6ZcQ8M7KYaL1cRQEi0XQ6AZaKJTo32iEpc6vEQhHtIeaOqgYIUo
bk0Laxt6ViDjtXD52K5Fuu0eUsfoia/1uoV7VEllHfz+nYTmMswbsoniU1yhLDxu
IVyJnN7ZdtJGtsT2dcc/60QDy7WG3J1o4zxsEwoTThcSClTPBFalFsXdj4KnykzC
g72MhZiOwJa0n9a+z1JrsbeYqp34kbF5i4suwAiUpF+jpb9XFKpp1xvqpX6qmV/+
yn9veG/qYOPQ2lrOPo3NdpySb5x9Js+yWLqmXF5WRqqskiqhpGPx1hJ7oD5tgjg2
DexXJIRaAwoh2JrCL42ujNHqV9AxB86q/4HPQbjIGh+Rkls8FSXboHC+QkFBwhBS
xEU0EgLhr+AVT6Q+eWpXyjOKQHGfUk52XfCwxdFQtBKkIkEqZV1otuVownyIweUG
l7vgdcwt30XTep/VxoEIWVEBsegK2lIeBPtKp+xvaoke1/ECoQUcn2soc9aLsE9W
rD1SKpnogJ+pyEb4WH/7tjDqcfL84HgZw/1w7anI5hbN/NtbhzOqWRIoaGEx0rQw
Xog3b747H48cFOtBMTfFjTevvDXVO9r4DWXP84FqB+uh/pdY7omqaW2IN+PhpzMt
XQlOXT0AyhuwU53mgxruAt2lQw28F6R8rmxOLDayFywoplv2AoBd6i9oLXv5XKjI
mJQTxHyEWeEIz+IThaRL++VAWpdQTvHU2RCejj4j7GHO959R+dMkSK8+YCZwEqRm
Dt9tqYoWJmTmWIiN9fKYCi7VGVgSLFMzj5lM5y+A3CQoLBMp7Mk2xdMyiyTGcOKT
UtCzLk9ox5/Du6Uftt8DMZmG5pcBo5zFmPXBzI9sb8ukRXClFrisRXnTsldOy4Ee
yhGvdM+Y/XQqvdcsUhnPeM9n/XBw+38crxeDty1SGKQ2wsEx8ZjciiVAF2FAv16a
UlcrcpaDTLU3c343Gf7G3/pyy9XI99CrtCRrMtQay0JPsM+xbbtirVnn8wbnGoRj
n70Yw4XcXOOla0u2nsadm7mQgSYcRVmm684KMD+GGf2gGQaTpqo6LhlZEN960uE9
UUhnLILbbXoMUTp9QShNq1UkvWZOn12jL4C1+uRYt2xaW3LUKKrlxHy/jYpzzCWy
KT+yQpVs2v8uAmEgZTZwfuqZWVmWitRs86OujldoJSKlD/GDUKSHUSyW2oLSCKMK
PXRy7TlkFk920Y7kDf4tXhS4U5vskoSybJJ7oVkxYi28fCgep7nFTpKZLHk3ipiY
Uo4iHsJqRAeRL5RwLPaLlvDGZ04nN+NgPcrtNP7j53ZdNcGJej0ID4xb6hQRXfzn
AYw7psklvocY1C7pDPzdTzVpb5klwUpp/nEtQ+wuyDUfmf5TVFdSWQE9HnHY3Gvl
A5W6ZGBT8k/VuqANis7o+iti2DhZ0DgGQ4bWYO3UriwpkuGDdXE8e5LWKOrcyNPR
U4/55+Jsgm5ij4LtovXQSKERKU+4wm7lr5QvpNMgJlz86BiDB+9xWv0d2siTV2A1
EdzEM6O0rPgvBKIRIjZdaEYMcdhZ1qSBRZP4atOQqiTQfUrZYsVToBMUokdDWreE
i8JER/RxxaIi0SK4WICrWkhVrwDm2M2Xprjl0eGFqgwZ3nge6b4Cqlbs6XkBb9H1
gqinRhyWFDaQ+oVApd0R/TuqO1Z2AaSHZctafdUxFMFWik/A29gsQ0KRd+ypj7iv
8M2wa8xTGjdTd3g7fe2r/Xppb8EvKaKGiKii+F9oTSmfAuoiShu1ZF31I1wTz/0t
byb4+ZsTU7CSsuN0Y8dS7DjD8zK6BSFcIln43UWwXKUyyfPrJ/Jv7FgTRbXDKzoF
2ePT491sssOKOoKosR4j4Qc6C4Lvc7UP5hzJVUXnp14PCO4huLlkq3ysvjS62+IO
hYVz53f4nsPj44friU5jm0XxOPGcsI4fssPdc4enTobUJ3o0It8AryBZlnDsUjx9
z+ivUMolkRy3i2a4mWI2Q88q7nBeYdbF0/OoG4fgn1CfVEpzvKfsoNLjUtSQ+8Hp
fBBN0KhH06v7F/RdoitsF9sKcmPJcQqFSjSL4uEMZY9zqJ4u4j5JRHd67JFutKq4
Sk2U64loiWwJ86Ttr6wnL89TvJvaa19qYKcrM7e6ooqikm/TA3DYAh49IOVDJ8X7
nHgv3vDIzf4dspcp7eA0hUAniSmpZo48WhKqeqTXOdFzOmG13QI6/dReYt39KTjU
pEMbmcp1/JbMXcs1q5YUEbXvalCcf3zpTcRJ24t7lyphki5K1heizEXO+StIuMu+
Kb2FO6pwRNuoN43ZsevQxsXf0buleXZ+QL1SvVIZld1V3QWOmqsbqpuYs3ziqEwC
3KPf/3LodKt3a34FagRceCVdFdYGAdF+mdmfUy9VWRO+Muo8oNdM2fbNKo5VmxMD
lTBaPwV1hrLSAxmjVPRZyo4iLD4knHjUsKTiHH+TJDoF58iaMOFmQmN+PUADUB63
iVO8s3Bt2t4dK5dydqd6nzIkk66JLdMl+hQ5IyArdBkdnmMwT8omzh5RwSwoXnGY
Q5frPb8DMGIcjcclqxaTPKUxRCsnGXCX2QTmwBXW+a2Zwjd+CqeAaXxDLiePd+pg
z6nW8yUm4xvNFhN8Qu0G25r8kFc+qnqgZiuMdsihWDoqu613fxA5IakBHp89PK88
+4OSgscerDIZl8VrmIdwOb6/LtGTtDNgFs+4WozocH7sJwcati2UmmhS0XIcVuLo
3fUpNuGseIEcD+xpkzpl8n2NFlApIwqjFVuLB91BD58ZsbpATgYVPxoSAQHu4LPe
/8feV8BVtbztblI6JEQJN0hJd5eEdHc3SHcqLSLSoLQiICApKR3SjYR0pwhIKilc
1oF9jkc5/4/7He/93fA5Z/aaNfPOrGfeibUmeG1FvI7Ngs7jifNqeF0syAzagswB
m8J/4M6rxYlQOyOJA/UtMXe0cjoP/mV4t3y+6huq4zI14IQ2Z3fTli4jRK22sLox
VSqhEX3jexX4Y618BnMjfvxN9CaV4Y9ah/ZqoDtR5L5GhGwFGPFkittInEANaEMj
HiLEQfl9gX2xpTmuXzZw190p2IC7XyiNzHXS0MjyoNwxUaNtfEeQKb7qrqeZSquj
w1UOmd6pOTcb8qKRsh0kM+cWns4Gk05fn5EKoq0lOsONRkSYkHioGOXdddUPpbLG
Im+2XvC2V7isxNOsKShoKamFt/b0z5VzFtwjJUCCP+J705JbnohW2WUu30UuEo1H
pm2BJYS/oyQvJEEngXJzMmSdIj1V/4AMFfU2obSQ1yhF2vZ2+tx7WfcbH93WvHZY
mHhDkHkz01WjPllrfxl9+IKLhTS5tO+2IQVMjalYiozs86sbYlA2mPkwtjpEMu8t
hBwCPt4efTmU/igvsbLgrb5YaZ5jRhcXB6Pr2xJN1cJ+c5h7ME+RyKNXX72DUgLR
qI3ZUNzKggmLfUL6aCC9HjHxSYeYf0m/aVpz8HMtbtL4GNWhXIsnaC/iYiNIxhUk
ntAZ5ZdJt7NwGOOW9i69axaPqPzyXHuMzdr8Q2vwo1ceKgaDO5lRin2OWqlsCzKz
NUIK7xJkHtJ9np3NbxvUdWehsspB7ep3WwrBH1rJtDKk0LW3ZgnTTc5DG6orz7G9
19CcXPaFXM8ctrRJcbW7ou22O4U1YkOhHI/y4j6Tio1+wwNeY3EUic4Jjlqo14GW
UhF27IusIiTNL3bsrmZ+YJeJTWyV/CCM5dQf0Oh80Npsx84WgMp71H9rouLzwHhc
4MSyozFU5ZyCHhs5r4OUQAp3wN3gSoaip2GMdpw0757yKbaIkVNsSHm4sVbSj3AU
0WN4yxI2qWeq17VWPTW2bbibe9Om5VbfU4XXZDshJ6QvvRszbTxHmXjHDKgGjsX3
7shQXBOjFclwqc80YlLWaBdv5MHjaMK78vhbu7W26ttCYYNA+JM4blQjlEVnd+1a
JikvHSLRjYlc+Dif50pzw21xHs87H7NhpqK8ZbWYFh3lCtuj2LoV8lyULnEyHERW
ausVvado3uvPH4O7Mdi9FpPic9IxMxI3d6uZ4m4dy6AFO5tRpnPjw6RV49BtxKaq
GTVcCbcrstEpKFYEBvLiBF1qrc+19ehk32bMCx7Fwcr3mLNmv5ToFfySfDtX3zU9
r2hxwdht8cRJweKAhV/Sku5FtEewUq2R88s4/YyDE6MTioYim6d3pbxb9fNX2a2L
j+fxxGiZ2zuK8OV4CL7xeNg+kYI1xZ1FpxPV1fmUchtG8dEtrDqRlHK6+Ilv4i33
vr7iesDh5LzChc3kMNecjOjxsflRSL9mfwjz1Yro4bKA6neTw2WvcPvohDhyl6td
RBWF2D/oNy/2eeqh34Vfk3qPauhyw7Fh73bULrgx2SaWoTxQnq1MX45QFBmfR9/e
WQNWkGMZJkCNEarJlrBHBwxTMEFNT4ElH5qslColGPhy420EZb+8HnVkYPsrx0qm
QJ577j48OVXSROzKEXFbS6+ujNIs3p8Oo6FQfZnjd40DfiyZ8patB/3bleUxI5j2
NQ4X3inR6/WleA3PP+r6ecIN1xLawg4t+iTwhLPiNErnXzXyxQk1fRhW3/at1guP
B0RpOvyZPCf7tdr1gvqx/Aah/eWW/X7tgiXBXEz2TS2ORbh5v6/fppJAD5LD8zlT
OfCE8kO9MNia97ZeZiOKh0MrIKxU41Uk1IVN3+Sv8Wgj1biTZPBGoqcV6+mL9Fiz
uH3WL68XRFY0v2YT8hJcee7WLavFX2Hq3uxWeSBVQ3+UANMPkwS7IijZgEXyrFdv
pzdxxV7888ye6f4k7K7iS/fyohS9d3A9Ulvjbp8FlR67R2xXDDhPyrVypnRYPaC7
0qfClkQr2JN31xVRk6QgwpHUkOWOmrC6L5q+Wxtv8jzlmnD1V7Lb+G5ZpuiFTwfv
U28fwahfG62wuFbbrqO0MhMk/uo9QoG5gfGH/mnSXJ8CWpuGTautKPSAyNGRgwPF
V/AxH5VHOmp33ycL4VHHxR5LOFNbxS4TcNlRzJGaq90qL5ztcOLwjR7cacONCZKe
98Z05gCVBz4vDfeeCB3tHhO7zjMv9Bpt5uAIrfd5+olHGnNZZKDucgdugBBo6oZ+
Amp4wr0q/3vO3G/cxvwldapMgsTRLRgfx5Gnj3nC4VwT2HxZhmGUSJwwWIT6FjXP
JfFJkyVygcb6s2Pqer9UrCrFb4oNcynInciWzNXI35DrUXvxR1DTn71N0FqRRk+4
OTCJ6NEZGh86ymcnQsezZx8UEfP6o35yY4p6rLHkeHWiQDGeTPEnhgG8kcjDrxMG
ClEZDEWSUQ/M91P7D9Js3Q630EUys7fNX0xWt8NAhekapgt72kWoIu9Qra8NPrm6
b9LfCLduozlSbPD+aDfpaLr58CtPrfuX7Z6pioMn7l/5ni0b00tbfBbzGu/t3Vzs
QK+VSPro+rGyf+PWkhe3DWHLISN4g8DWlIwbRZuJ4PMTuK0bb+N4U9rp2wYEpZCi
aJBKmN3fU921WegRfh3qgBlr1cvyMo/1W8kMLkII4kMuOEHGjruxqdlYFND8mJUG
HFo4EktSO3Kv0aYSbuuP6WhIr5NeV9COhy0wNiSPjfsUsfbhVTq5msiE8gNPMQ8m
+hm2uM5n1fd3l5u6S1AeeNULed3WJJ7i0XM6eqZ/JWPTNPvRMMPciP3ymLpGYRmr
aOsKq7RjcXpPcdkE9N5g/r0bL7WSIjvEWVq55xe3UssZKULnfQXkSws9Hj1X97uT
41BxvX/OWlZ55EqAq8fjp89n/XJnvkDhjfbS4G/gj/ISkVvfU9OyFog7JGC3JKJP
iF2ZszoalS5jMcVJCJGG3QghNtmsnQjZRqi9WZtQFtdbWds3VSw7YjNq6qnpQWFS
M65jmjStpZe0UNXmELVL12Pxgp5EV1hWdPXQ6o27OnYHLqdG3umEGZrMBKP2SS7c
8JN5DdYPRlx4QXsGBY9vBIk9zYyInW/9oDHC3JU6gR10I1n7CPFxLNo1Y+eVrenD
WCuZFcebmshmmb01jyaqs+GhQposUaNGdFS804K6uJkbPeEbX+QMdnuPZo9lW8iU
DCXZ3ucwkc91cZblsulF07viiktTx/mSPjPjS8enT0jf3EQ8vDcnq6mpBQ7IHexs
uq953qSE8ircf3ATl+bBQe/6W377bauwft7Jm8dL34oaku7PZWaW09fy5LubjOVe
qSlzftdDNPWR96h3iF7Wc6bElE1qHVEi7umxApq3QmQxXRCHJoeRLRVaE8LCq/hi
wwBncTVCukrqIfO12Z6QtnJtA4lrovX66P63Nz9i8FqmWNPNqs1PBLWXCXArNdc2
Kiorpj7vk/HRkKlOq17I7EMj7XCDKsAje3Jr+rVTjkNryefscerUvrI6QasaG5Vp
95aQGqfQkJrKlFpHNRztWQtitoSJmadd2Lv+H73SR+pgVv2yR/w57hkHTXyOEbo/
wkzauXijCS/NV5+LpyNjOcgpPYCDbCVkcUFEkA1HXuEVDmPwXmf2kVhvtHWyymjp
7SO+CclDkqNhk2E6iey83J1jGrSoDFjc8k6uKGwqKFfYG5u28XWm8M/1lB8z2FJr
ayytYU0zSYK7x5eghwOFQoUdQKzi89ekzQP58/W6QjOsl53Segw1Jyusj6uka6Kr
3uiqO9m+KymyHuuz2/r4pn/n6/tbK4qluZ59u8hvP0XHlU7YBdSsrHFKF6XzTvLu
frk/xnW8TyZsCcskoPhVsIbzXkTvGPMI39Dx629uh9zOCxLLEi09xm0wNyico4xU
ctjapFb1vvpFrkaRqttjmLi0mpjdjHZXplywevSslaki3E+l/Jn2YVaKWkiiq3+J
4lXo6SeBp809973coMpoi21syJGwfznjm76qpiYOzpHT2Xo9Szoz4mFLEydIZnVR
Ta8yMdcxKnbZJrLNnRihx3ZTIdcjE5Hz9fNMPs21vNkoLeWSmvsK8B1lWnRSpY8d
ufuSWN2ywHN8DJbVWa+OrJUjE6MUu+jlrxi9DJspwn9LdX8ulqpSXsm4J0x/LPeJ
i9jgu/evX1WPVx8hls6nr777yj2MxX9/JTc6VIJrLabv87bqUeGcOMMXmDVkAVet
3aXbPYLNMu22aCqtGw/Q+BBZFosXD74xosckssXQLDUTyEh0En9E1sdEELC9PnSY
KFl2DINZchNkatv8cRazcIjsE2YEvgPbIs9Hj+7D9G+vv0W9Nt98lJiG2dYntKw/
hsxJ7sPN8ubD+qY7Opc2X8bQkiNnHcmjGPRGW2sHpox+4z0zZ7k3FUYHfKY3xViF
lhocZPtxLSyKu+JzfMQFfcUFnz4sxmjQY5a6OppyXyf1WSu8G0j4Q2lb+UotIzKu
Gb1xdNCqArpIs/EL1/fuLsrqvI31gV/Md19B01wl3nvYmSq54hMiOQJfNdu1vSQe
7ta4ztxwlTJ+r+Ikwr+0pKpqOUuarGeqg8/cy2mHcLdE3qmJ19RzTAa/JMTlpuun
3vReVqivuzFcKjJrHIf8NlNDjomaVrd8OPmNdNBup6UWKdB/TrGDVSS7QdvGSjAw
4y0RTLVfzhfAGhMpiKoYXjBdPP6yGcdTrrUK/B6Gw+Id4cF0+NcEGanBpD60AQcp
Z02MdKHOR15iro/5mpjv6IK7mHoUlu6bLFMPrBi6ZK0YiH5Ah7Yu6uZ8ydGAlR6I
SLzhqviCQ2/xypMvD1+0oJftU7Zw4DVfT1uXnXv88H2RY2ic4NPrRIXZtuXkGJnE
XfBfkV7M7mSPSwy8dSyxZ4yRzA4WkLbVsLWzlZZDq6dklUaB35P2y815yRnH2FcX
mFG2eJWJ3jDTmFRbnZd9pCx6drUhTZuQ9RoOcn+n0SJSewOOEklSWQnfMLLclIj4
vchu1oAKnRq906TMw3VDi8XFU7bzofwuia6zeVH0XqOTpjvVqdG82wNd7NXgMJfu
dcbCFm+bE5ai5Dnd2inXTyqw3qr9S17V30K2kwZr5YYOggJcVutgpQKqkPUI2+5E
43XDoFHNhWUWwhUGO+ij3z0digq0IvGSInsFRSRpZhViNI/v3oXZ7Y9V8usyqIBv
NsTzFZPbpFyT+tb3KcJUJqSv295CqgHWdk17AZcJoadWyRWbnCSuM3CSSDZpuS9P
mjDj7o7zWoT1YYv2Vhi9jfvLhn67vC9RMctDO2st5abMRNh48HDwM+pf9EiF/Gid
r3atdRuTrjKwFdx3kdXJE7/d9oXDntY5T0//KMknFjbcESpKMBzUiidDgHFFm/hj
e389Dw6IQgWkvvUM6cjZ2nS/Ceeb74Nv6ltdrsQxZSThom2KygyihURt2Qbg+v1p
GKi6K/aCruQEGFYjhw7b10p5bea3Q4/eJpbtobp1Je3MbjsVonwW8efpDBbeE070
O1CCvxdTt+DTEVRTfFISYLDsg/GN1rGkSlDbXNOkdtJOccO6MMI6cijTwspleIjz
M2LNkmfHStuVDJamHYSpj+7Xpxz7kzfD8Mu1HbnbUDG5HxXkcldzRI4vHNIO9LUv
4mnYl3e819+spLQzo1s0T9tdo0OnlRVXqt9M9104lhHS2cX3XJzq2/aVdICvQs/y
8Q9nxeBR/mJ8NFPW126PsnRDzVmyra+CS0NJSf3d/txVSe+XTSvIjqOo5MsKg8nb
MTRH9l5jQ8i4ubUZc6uiN50Sq22aK+Ac1qtWRjnxD7RrjI9G1+in3i5y3h5dmNkf
4+N7uzYaUOHImz9TwpJcbLX9Zvlhucs4n9XiAXd3hqj19W+Wc1b0lus7xpzSi4JU
NZGbN3RKmpKhkSbkQKZwkaf9oZ2wziz1oSHLPC6lE/J6P6G9i/SohL12d5lDsaI9
l4cRSlp9sOO9DSrKIRaMrCd1ez5GHpxiOcdK5bF4ei+wUprTPmbUzghTEHyShLeT
d7mRJuhWAYdzcvPzQf/9by25thlB7ExUByJ5KHiB2TCqZHnPcOFxRRZJrZ+MR1be
tnf5nOqzdOuNSA3ag8ykD9UxcJ6YrpzgLytMHY1PyielvWNPcxOnbyNcS2x+ZhnM
T+ThJXWXtHTjDlg788kwOGKCXzlbs8Kec6K+qfgQmrYcld3Bpk1i8iC4pE08sGMC
uaJIcTXSvZF5mhQZxgGUnUO52IerCW1QnwXvEhf02hbvyDc6uopAjdfjiNbQvX/y
EHeNT7bLxorPaVvay+tTWthIZa1WQdby/odSHvEWC3Ztl4V4frqCAHLal59uhsmv
9Yb2cNes72Wl7j/7ptBkWInOU4NIEsOQ44mVhsaWHsexnDgxsOwri2L4+TCaZsMP
jFucyPiJo8CW0yT+9eMKqZXkLvkljRvFqH24a4QLtIoJzhpFmRKE0dEt9xysbq/d
/OrFcTxT3Oo8QsxNRtNDWYiCLsAa1+VcRzUoh0lnLn2iV/ZwNzdhjY/A4CpsDzo8
KRppEt2YB0dHZDaleZ44U0kh2SO4uGYvVgxNo/uZqFL6zDzOzzvZJOea9TK/xtJY
RWQGj9M2sDVPmvCZxLwdzny+bkG3rc+saWjNwrzdoyXKL4wA84Do7jtdBD4Z0hwo
xeT4T62Z8VgfRm8f5apWUETl2wy6iN5QGnznt/Va4w0hxzSPrV515IggTbDYSPhI
RNCGU9BqpNK2DkcG6TeYGGwnx+ulgXsUd+73PnxK4bb9KsUgSt2g+jhA+nin6WvL
i6PHx98ikvcLdNonbwb0DXE9yr+9846XfdyBPQyBB0EqBCbdsrih9dnWoVJmtGfT
oISizQrDinIf17JQW1XfQcROBA4zrOU7TQMsyafSW3cX4PYtlAvaixX4qJhfv5x7
1BSlSrxcZS7tNWj5Zmtj0GQ1eyS3s5TTDWf4Let96KpvzHOFDJ/V1VzjzBED6P06
zN+ZJyhHGKmr5vCVYeEqf+gin+4xKiGhUE7vtGyALlc2YBM+0VDnb/B/3MZGllZ8
uwVHvVxwweotkUkWzM3bRUbWxisoldJDm2XubFwNTdEI/Yk4ofD3FkT3AlP8YR6/
99ZApVaVeDU56cUtes8kfuWdlSRxXcyLvqyST+axea9dfRpnKRdquN4Sz/jEKudq
5MJDCwnoYSOMC83v3DwcNG6knOKcsHTZ3ueygoWKZcmoFPyQqOHvL6TSlaxsFGX5
SQAhDnNjnLDBqq2lyglVta1qXjQbg+/A0gWk9xIp9gCl4CkV65QqGX4NFV9XJRLU
AfOx1CKT2IqP1VtHdY9I26u+9+fS3bC9THb9bPL5FRwOb62+ZTHjv68xMjbp7zF8
3L4fMBKj6wI2Q6JuaZyH/nBvVTgjLDW95wYbn39Wv88eqiv+ZyJQ8Ipm6kMhZ3T+
nLLVqwr7ceYFnIHm+ioJgXONj9TIzKf12deN+7296bkNzfgdDVYewGtqEdre8hZl
tBgdLb4lOur6mhTxSmAP5jLK0+YurjD3eGHaQA3cEhLzzo7du767evkeesGxHItx
2ynChUiBsFjct/Jt69HvJmKJYEJ7V3xQnLn6zCAGwWn0cZYC+ZGWJyvUhqT6boH4
41ILy8gZ8Oxd4fHHyJTEVxDZrSNN2wX0X5K/V1jUnyZ1NCAwUzzCYh3EWFTwoMlq
p15bWa1tUhqlL9X9HFnR6h+a193W92FLooVqyT3A3PCJxsLHNYKuu2K2TAMRoXdk
VhpWMZfvbPt9cl7mLGpr0JIxRff3aYlF0p4QkofK+mqXZzfgjaCkHPTBxIEjUabK
W18f9cVd9O1V47GZmS+WCo4lz76y5DgHKbOvWlgOvL2GvvyKjUA/FyMRN1a0wiLw
LiZFwk5WHgtlyJNXxYVrXZ+PnZKN8LY2pTycXhP6hnfcrYtA5qb4RHybETXxHVct
Zqtst86KDSY0Fj5sAx1S81AgrweafGWqHJ+ovxZBRKHfkgRsD2cf/6qjRnlxJzwM
3/Bz1YXVeApo6MpDJc6OQwRbVfZik+fHRoSk1Bx+K706avcQYO/vJrt9foiPqPA5
ICLXzilMAO+YX/mrk9RoL6P6yP3Ph4ePwtykuE7m5PYnHJ5tbTpoTdflqM5OYyNX
G2dcmZ8wUas+RmI1QkdYOXwV0UKMkyXOno1hT8UsGWkecb0oVlm9T5qc4T277zHU
gzAGxGHhNlsFiwPduw+j4hXejL22xje0yKctYB3FTjDvdWO4IX9lfPWEeJdJS9LI
kzhx+43M5q5Qxl6R/UNtFF6Kmfl7cpaJ4GyRDThS5EMcu49ZXwrr5DJchXZmlMVY
lUXhkB4h+DXOzGaLsD5SufOpZI1II+3GwvX8qnaUOPh3myOfGeq2UFo1saBZLAOp
ivoDZhcOTZ3vQy0a1RF4e6Id52+fapwpTI/wZf41/4cwn4m8NA3uT/FNQT3MfTYE
Ug9ZulH+nJv527OtzC0o+9GU+ZeM5LMpfF1LDQpKStGsI6bIoylb2+8muksTFRjw
njDxttiGfQ1FuxHR1m7UoTwqvMuy/nS6+P2rVuXeSr8wBtpEavEXWglNuq8Sbhu1
ihN3gzY48BIQTiU4QTV3g8caNZlUWLxv3sELJ1wUM0TrssOxI4iHfcSUcosggfMZ
PTII+cutGd9BU1X4/FtS9x6j1Rgo6NYOZEdU2V8/ZovC2ofLCYPHCi+jxku0Y4qy
flk9lSaka7k8XH1i2zK5VpvGedNTMJX9+EvNlNODVrQ+kZ1Adi7P/QxDwjHnb9Ey
+8ottVxohtr0o1JW/Ct70EKfoKbc3+Rvf2YiQOoQeYKCmclk+yyafeW6xbJylIz6
dZcwygmRohVSCtQEuSZzFXSvqUzPk77M8B6Xqwaid8W2qLMqb5aLPfnyODa1OOn1
SaRkYPDhRNEV9EFi0nmTyVACN0NRJbuqo62wEzBeLlwVB3ZqSR/UyMdQ0WRXl0cG
7xloabIE4xS+3q4KFvqsU21bfQPT/ckNOGMkWjIyheSSzsmGSb1ayeqOwqZJE37U
7Hq+5tD3SdLG6kOtgmtysGVG0iEbOrZvPxj0KjdlZCFZSjy/zdeMjWz9RXUCqY1L
M63oOguy4EsyZUOl0dfWd6L5S6kIOykz45s/mhiVMYopm5c5GQfXuwvEW/uUOGjI
g+XZWcZu6CXZBlbswPJA6wjy5KFpX0VM8u1qWzAZfD/vbHLX/AB8PeExssandWlc
dK2CWvY7Bd4cxLybmUKlVxHeTwp6k6yGsLLfUeKJjbqiqNjaoPMU1fJkbX2ZdmJu
f+JjeunoFEjVY7jM6ANVeUeY0H5iwGbepESn22NPA2wnYpHPdC9S5HCW1/K2dtC0
ZR6V0++iIEuTq5ZT3M9DMkPPRq8sxDLb6btHmrijSonzlbgd4xDhBNbY95v5CY1x
tIePl39hvWfRVNpe+eKXOgJHRh/R6WBDWjXlpOdHWuKPPJnjGPdVYilwA/oXCm8V
dcyhwwoRl3360CXm82F/8LPddi5jE/omomTUsus7X5KBzNfmefzz24dCRJVNkSu7
oJ2yAp1sC+uk9HJe3MobW9R0exUP9cWeYAtSvoduwAnqppnfLJsQDoH1w7R66R9K
xlWQ+jUVTzjZ0GWFS2vGtuzZZDWW67xdmpirEfeA/n3ScaIbytz3W2MEyCg2pbqI
a7hg4zrm4FMEdkKrlDjtM2ZTsh6+0ll/yO2TFa8KXVEMXagt8Dah/2FL+8QBChx2
SsEOCZwRTh4WbZezEOP7QKymQneMh+xCGDroO6+uvUBYkEFIq/1Ytr9mCBdR05p1
dLCbilVgrVszYjdRE+oS1HVHt4W7fXKbFZ13oxR6ueirWAv7SVmliDscdLlnFN/9
4fIM4qg3YklPDbdARtd29CeC83AD0lhWHz91tnsaXV+2uRv4lbq6qnhSXpdrivFN
cXLL3ZYKujB4oiCe9Y0Yo1ldEtsnrM50XEmotXKF3FVv5gX2bNvWvyVFvxaCxu5I
MEURRpbC4n2f+ZzuHtmuCfnWN1cGIgln2tzXkdkVOnTo61ziuZI62d2SecVvWnzb
aglPZCoOlTgyc57hKMF2bD9INtPGddHXNjDuvrFksqRiOppp6fTZ1jMgNkBtysVe
vQfupjfzo6Q3hVwiiY1msz6MDxFJhdV0hwndQSshJq/nmO8+DPMbwNXsMIzM7XC0
4mK0+3IHaRupzLiOvtkn2FgO7LBy/ZCiMeu2N7NgCWgPK6YsPRBu9u5wT+uQr4pz
yQwN215WjM5A6j3RCAU49YFZR4OSPFYPx1KQ+xZbQ0RQvqqyJs6Yikh2Pvh+M17r
GzwalIUYnFV2QraCsszmRik9Rrbehy2ChLNzjIHvSd7oBxtiXitBQI5z/1p9T7Uu
k+vZQ/2Ih1TZLTc0vipOvDiaRc7rl9FzYi96SR5aB6WJ1Lc0gK6CrvKOADs0X+0W
WBLZrc5PtCefpb0WwUdgTr9cDySEQOq9IwPL5xtIAmv6nAYL5g5Fpvvgi31uHfy3
D1wXfMOW3uuU4A+Ox0YhabvM56HSB/fSvDsaMnh3/QquLK0ui81nRRHOUlmCg9nn
qYOhW5yEEb6CK04TdNmaNzTcdxEMD3AmVJ/zuSwZeyxnkDHmGhmNbDzKFtV1hqF0
J6SMH/PjYX7V6xpM5azqo5A5QCUhzYNjuslxtDP8cjhyL7osM6mUSy4ENPAswr1k
knFE+WYZOZOu9sfYlQo6W+1XtMcR3+amW2ZqXWsRPbGOeZZceQjRVyTisjuHhDLt
rrc/y2NsL2lv4Tx56jWwGj91OwEvsLnuqYpXpxkyDkGBfJdJnYllcZtdQbEFFos5
lgyf5YciQQoYDtp7CALkI7B1dsmJbkHyzZtmmlArTxBmbxVuxN8X9w8uka/wt069
7R7fbqfhVwpDei8e7U4xqBufM7HqNRiHClfmdYBocrLQHaqPmzAVSNNVmNMogndk
X3sc4bIkcufIDiJ8ehV9kNaB8cTmypfE96P0bEipCCzzizv1t+EGe5kKsRGxqscf
v1lkqn0kMmjQdq0KTy1t4oWF+luH5tC0uy27b2rfeitLVdksSNZWeS5I2gaclLvt
LPp1cNescBzAetieNFaiV9+fzxV672zYR5GmGK6KyUVmoa/EMVT2uuMuahVnISym
5whWUZwQ43UbvL0uKi/3Ilf3osdq8RFpfrif0cjRPTaiGRbyNR4qb7oXUPF1GmRs
DuutT0+7ru/p+ZUS7+Hdl3If2Az+KtWYx1U/uG/5gkW3fLKmsfej62BNR+FYRYc1
ep3yUaJ495FZXlMeK12bv8jWtWD8+wInwcSoeIO4hSEEFK2uYLoYVHLtJTxDPHcf
xYWotc6w2X0kyzYOFpKdZ8QYRgirKNc4AhEStYi2rxGw9ZeVwyczUKwbvd2SMSHW
6eJNxblSiEsQ9hIhu8RTnc1Dlubp11zuklWprQGmzdXHmXqcctn8PvyhbMKsMYO9
4CWr4XwSGMp7dLPBz/X1M91Nu13ePBjffGPsVb2ywN/k8nBIamSjntmlszZm8vqD
LwxdyYMxlJqVc20fff1tarx2QsbKJvixObjhQx23tWjnrlNHEfqHIrVgBCgsZwdr
N5Grtew3tyzmq7dbdkjpCuXQHvtsXVnPmKGv0t2rQT6mPfKfrhLgeRFs60yIOVNl
8bkbiWAC5ptamiFsthPKF22iynauNsaWTf/l7LqwnWDFVM82s36tabGEEem6yEja
gaArH7T9450bpVlhH+CPh1jnk2cEovhV8GqN36JESWvyzxlrvN1Ki4eba4u+H1z5
/EFzwUnutAKIH8+Pw3mcmgfuEDOTx0QmwTg0pfdx6AJSJJb9aPAqi0w4tJUgbZz/
V8YAB+pmrXqzL5KiLyrqtMMHJWeaGrB43tk92nl2g6bRZev6bvI2VTnNI4ZucPCV
eDrtuo/ch3Xx/Fr8J35j+EQ0FtZDuhWeC/SlU1Wf2pxqhx0/L+cqjXI4gx2OOZ66
TXLvrZTyea6DWkYQxHq1NuJucuDbwM6RLgZwa78Z0CQfNZFEftoUPcKG0zyBOMOl
By2DN7cHO9/oqr26L7bf68JGsruzg7wbjLoTHIwSHPIFnETLNlFEycT7tr243Sv6
OaqZK2LnAgJ8C+wNaMkNBwTGIVwr/GhJVs4bRfFtOkZOBma1ivElPvgM6zfK5qDo
OXjugaemZeufQ4WLe4I2SgSQvNkaFLQ0IupT7ElDqxfrU5BqWOHtWfEzNgXoc+ss
sZ+qOBog3aHWo/C7zYMwjeJH3ISCgjsd1szolCmVIxtqyc8oIfQZD/f2JuZnfW5s
Y+eC6goPs5L8p+Vq2OJGJOTDbQbXTXtNu7E6ilhkc2biX1l8df7m3KPLXZNaw/8N
al38Ob+ZVYXDYvrXsBG1+1PiLrmeL2SQ+CZ8nRwQ6cmeOT4Y3LSRnipwofPQm5gu
7xF8Ap57ykq1HgV2wivnQ3by76jnrRf7gMJv4jW+WSUUwiFBkGmrqYa2vU8Z2Eht
rxRg5NKUM9ATyfcmWPdFvvUXed1Ri9Z3gtdtpsbRCxopCkynTosbWeDahCvYAG8a
lT8DSsBI2uCQfNgS13M9wBEn+qkegXUGxs2MB4k9VixQD25Hl77fSlW7SSEbUP+m
t5o0LLGJm/LxmAv5/GZ5U079LX87tKkVJV4X0WwRtmu+B7z3UWp6N/TTOgzYMvPD
WYIoJMbJVZ+SEClUONNK+8pGE/PIj2QXQpdrVbcTD5YpbW8nRqXnalZHjKnqcLKO
lj4YD28ISBNlp9WWY9yh6sEaTEZlZntei+tQQdTRcpQrdvN5zZXbiVZdx2B06ptL
nA7pgf72ZJM5oyvhIoq1emUkryvWrJNgT4ZwFDv5Ej7o3GN0/5InpnkvwR/+YSei
98uC11ok5jeTGGB3ahnHH/Tl7/kiFoGPSDUwDxcUTd9hBxlP3yzjRGptf8bWzRX0
ms5bHio0QU9k/YnStKM3LaIl8ivoZW8CvZp6qTqJBjyZObdpMkIfmcj9AWT4OW9M
bLWO2OtUtV/88z+EXT8ELYuPa9w9hvkkf6wfrnGNRupFRnigNhm9Wgy0DUnX0w7a
x7SfVRAtOaVlHJL7jcIUApB4iDHp4rQkvY2oBBcEMBWKMNCwg+6R19736Mi1ota9
3mv/zZdxV6lBeO/4+MCUyCap+YWW1/befRuzqSuZJVBojGjvkBiihJpZoyePEO9q
vlV7q64QzdbB2GEWFKc2G00Wfbdj0LLfTnLUIOSWIa5NBvH6AOnEE4Fwg8hccodk
wfncLTZOstK2FmPFhAcaJsKDC7eGoxaC1xrJoVu78VUqvZmu39Ee8O2zoxFaBjHJ
44KWMD80EbSnDpwkVhvH8soMsmY8bJ1OZ792oyOavLrVIxo8xF5cXNzqxf1gL1GX
jmuXcffERvSDKM/2UiXOZh2C4VvW3WXqLe0EairmMSJe5rGjeikiS+LWIf+6ZZWF
WJKwu04aEbPtV2Ej+pE84aDbhhUe6e09E7hh9ehmYtGz92yxjKsKn2ZwST8+7PFl
YCu6mxXrT1ObrW6yjsKS1i8oPJe4qhUuvyW7BP2qGGWcLl1IWCS/hf8B5sJX3Jru
5iRCHjMq32iJ96W7GKJsbwPEZMlbr+TtpTL2Lb6mfCrbSkHjheaZTO0l1/2J5vUn
REnKLE3S2xH4zPuG0zTMrGQYFKVEt19pIpXiFAoKYyX6a4Z7Um23OAQ8ZAWPC+hj
7nFkJe+GV3b0rpkkck84H7/E4J4WJ+igcbRbAWeTmVXro+NYB/a9LtPaqV9ImbUf
Phm03e4QEcnnoELhLnY2iuVFWn/Hgnl4vYdp9MnKzJCfOxnSMqZgeUjb7Ct4mzXx
2JFQGrbGQnTZAPjQhzFi0OrXH9QowicxPjiqFw4nw9wKfoiMpLmctcgTGj3/OmiV
ZvXkK9bzICeBNrI8UudREQ64t/zXusHGr9buZYyTfHibFbWJSUS1NTIh/8luj/s6
f/YNNzRwTPdjp5ft+bXh/TFIvhQdSc9rt5L3cq94bQo6GHzyJuO3ieNZaS/5Np9y
5a50AqPbeujEWtNqoH//Ae+G1KFQjtmHLMawyaFj+WidV/R36KHcg2aUSaNirIY0
SnrS3lRlpBXpYLluF8uj+pbLp6JbiAq2CC2H52TzZdBP+6BkpHs3fLIdfQ5HTFwq
JPho7OHOW8RlVBda6morQezhLU4mfyyKV6XSYjarJ9x+cgnhk8P8QU62j2ET5DDY
4pvteyhhA0eDEWLmk/uJ35IW0z5FKvGfxxh8/g3qXYJphMyLmaogGtdMUE++3lJF
Q9h4ykKKJsJGMHqbzcy+rD8DFeUkCsZRM7Ut8VO6MPyXWgfvSLh1n+dmcjrJZ12R
sg5SLokvSMzFeeceqhDzIUrEflmDiPmKBTKNaSosdMF17Ddenw5k8V8QpKprSlxD
0T1O1Np5HzpKdqvDxky3e1C79N70t/WS2marfuJ86SAfkSuI/XCV30hqhztS5bUo
Ni1pDDkD6me9WyxRxwLiHmVHSTl9IujnUc59f+B2AEclVDKK0PNYwOpeFtMHJpns
3YErzf64t4NoiopFXoj4qCfjv54yUCBQlUQI0njzlv6pCXVRLvLaoJ4UWyUx0wM4
+Zl+UbjrG6yPgjv0cLsFB3tXHdfs9orxkkAcRLB18lAvuzZwsVX07jyPZS1Ci0le
YmxFmPTkZFeG4kZ+PNF2bYC3/uXVGpp34PckUgM0Q0j7Dbp2UC9QtSKDYO663y1r
Q3qlIzB5Gy/ni2vBomBD065AGf+7oVrauWeb0dfbUYKC4bgKGudwMh+2QuNMzqTd
VhB6Ub7CnvS+rsur8lCtJZNXemWIlXWqvAaRXvfaVGXhXM9awLEzflda6O6kx7qX
5/bnOyj3PFp4ONHxdsDo9o/s3mivpGunh7yfv8GbVlQ22fSi9fZuzBJKu3qKTe8H
z3eevdS+qsIrA9lrin6Kqdsf4L66jaZM+95LOK5Z73+fEbHrILsnM0801O8OJqYo
eVWr8DkD9dmb9+n3dIePo/uTR8ZlOK7xsBgigVmEEmd8b6lkqaNa+JX0Uq1A+1cI
UMx+0SVxwHOwwnnc6EnucIeG3aEXEYyVDmXbJ7bR9jbv5aROTkxGePgJUcQySiOC
WSJq42O5Rn+BTnXiEJFOcqzHmNRzGBFg4xuhtzCEmDvk1ROd4A2OmVFgqIO259Lk
8Wwy5ETiE8SkqJxvZa4J+o4dmB5M8Ls0ROwP3ax0a1/8/NlUNc99sxynw8W5U1Fn
isN5NX2nQdYlsfKw3XNt6ZUpGqHrLvo60VF4Rx/3uyc2UAHWW6G9tZ2SrHHk80hu
DJ5osxpu/paFZcpB5nauE7hXIpTMsaJkc6IjaamUt53ovxQ+2D0ZIa/WUz7SK6Mv
EC8QpiCdJKuQ7FRxfqcrrNBK2ZPfjfc4lkY/mqTezuQ6wT1Gbh5UsVg14fum1Yo0
TkP0qV+ej1LM4cfqO07uD3i7sarqMuu9f3k8tGe/kEIRg7a+q7WZH//IeO3mhvrr
O5aGFCbJAdgs1tHbHvvfaFTVHmFLtZ8OOKP2bxZCfU2r6Z09hOzVfCPk8lse54n6
SWCX40tRZwy+V3LKMs5yyrLK8sgyrOGaYprimmKb4pvqVRhQWKWio6Kk+9hXqfek
pJst+55K25PGJ77NvknqN0undLfkhq648xh6TB47bjLvoTZPYcNhBPcM8+w/F0jB
ovwIK3xTJicF/YrwTbTHfAStM4G0L8azbpvbJU9Qie6Q1FquvMCamck5slXl29+0
lXZ1dNVwFd2zHZ5HamkIamipt+ep4uysfwPD7vnef2MUVa0OpZtLgZDlKOXKLaVU
lJ2JwVVkpY3cd8y2lGt8rKb6aB2B+13va3li6aTMX8RD48cxp8YESXIOTuCGvRe7
M7zxiKp9f9m4fhs7Gjvmy4Yg8Z7cylFnfncPUhClq5rrZ33Y2YROuDQOJ9WcT2K3
4XbIVuXYMAUWne5Abbidfuu2ZtKGPNZcIA59Lzep0m3ejt+hzhkmgI1h17NK7e1u
Er1Jh3ZlD8QR7nZNmt4WUcUlcKY8XKm7LP6gtw4DKtAytnMMPu/I8KE9TGiEbY9l
LFTyy5wvTbo7fZGPx/VZNWA3o9rSHrNrFXcJS6E/N5ehXUBsrH/0yHU6ncVLFt5r
RIDvgXFqmaa14KYTrb0FUVe2ePqDACKy6KsOT6km5BYO8hOWpITF+XQO5CvVUotf
DRuwki1QBlpwaqVS7HOpp1+NA6W1lVjM1Dl5utJgXie6pkNOSUfVbJOspJcpUOZ8
rf7JnRwcWEwwrnna6/Q2p6GubFVl3OPVXNG76Kua7lN7mjpJszIjMT2avPwYlEGT
BSfJ4tuTFQsbojuFw77GRQFa0Qg40bo1zgP5+JKzbTPsPYghCVx5siTRcyW4OzfK
3D89zVWtbtwvBn/jpVYmujO5e3MXg/oeg7wS1AmoAAwKcX2GRGxP/UxMQMikBEdC
sLC8+EGkLOELQW7phA8aklZ+bohbE29jjaEJq1EDbawWb5lgDeyW1h9B132A9r2L
4PJ4gRA0vnWNlh9BQgjZ5S3zaJLFdQGSKdAVpq9BbvQJYSXjk9xvqgcK4Kl6EgUU
bl0Vkkn06fJH0OM28K4ze6Mzyj1+R4Ic2S8ODA6zKzt87GImvMjUT6Kq0qM2/CWU
O95lbYtc0j5pPAs19ht2Qnlg/DXn8aLMb6a3KmefkblGhhu37Nvc6e29LwbrYOgT
1upo8xJ6wH3048KmMml1scAX+NUB/Hxiwflmlggdn3q5cPw8TH2cK/68BDu2ybST
t7ERWe/ooweR0eojXvF4gJufFGII62/h963okR+zHpfYmC8LB9Lt+Q2eckwCTkJ9
SZIxkkwxLhJRDKkZUWEGv9q1LM1QtVBNIxYT7CtXmJ7cwhf1oU0MjDKqx8PVh9MU
xmtgojrCWsLqdPrklVD5YY3kQEPxeS8ByUPMCNaMhoXp7ClyZXn9rfavlHavrau6
u+Zk0iwKMKA9W5tNg4KoZmoMEB+uTE4SRJurnMzEZ4havMVNOKwoMFxfm9py7dgQ
SaWOKTocS1hf5rRc3evCV8Mh8JDwJlkmzTdM0zVV5fN9IpGTFRhP90oF23ZLsT0y
xkTNVgh8YJ4mKF5T2d6+UNmgbewjpJi8hYSIqMtuiOxD8/bjpmhDZILqHQk5/fVX
+nc6vWFPPYZzg5GfcYRFFwpdiMmiSSxwMovRKBpyosJ5tTJk3mpJvjHeHnCLVp6H
d4eplNc2Ln9X8SLPdOVVZSf+QEg0RWtD9GEOfURGzpso1S7u3PXwKTV+cq98TyG+
0he3THO0NzkGMRDVJMUiSsKcWBjDPS1doXGQEtOfSF1F0Cm7o4NI9FxPyhTlGntk
zlGa9XC1GPOMVb3tLCJFyrPbTybgodS+ml0doaAMiAyIfLUqCC1xk/oqHhKtSlKT
gUh+1DuGmThEJCYDN0+aPhQpk2y4TAyJ60yR28oNDBhCgip0IZ+ZMFj0kcANKcx+
i2M1x7xL2q8mSoZKh0QFM2QG5rr1BrOQ1eE/ZyWlj37QX/Nv8adnbI3IotwSaCzk
HzxcpiZE9nJKwchemFpdLpOhM6817J5FpB55JIXd+rDzVIuERJwZzLoDDUMMD3fa
aEyDbvR/8XGVx47HuS549Ey+tNuCoC6ehYSQA/ShnbiU+GuudeCssQizyZj/iO0w
cX64xZOhnY0xJetGFGEC0lsfx99zBaCZiaKb3Xw80GuZ99iVK+8aB7PwOx8+DSqX
gkLqcdXK9SZ8L7nA+pxFejKktCQoDE5OK7VZNxwNmozYoJX+5uxNX6QRo1JXaXnJ
4dRpUVhptvnyLKIQV7IkzvS7Vpwbz5C60sz71O9QdX0bOO4m7mOI0ifKDM1HdUZ1
0J0pH2XtLgLZ+HZtjt+raKsSnDAcXRld289YTkxrXKQjJgs1MA3MHlZcXJE8cLWW
G8pEl0QfSUodG3HGjz5qte7XWbJZSE0Po6FYiMp7w2Mqxa9hwCb1xixFeyD+9fMU
58DRKLKx1x+WI3kbc+M/CBZlv28jhM9Qt5e7TzxIHXrDo+ypvfeBBKe3rsW2m7RK
QmVrvKNseIt6RsW1CtVK9opc62wUjfmPreBHCSUx6QtPiUdY3R69GbWg2GNP/SYv
ivrwlVtFqHqBWi7VVeec+DHUfT5odS6iYZoY/CENbZlv0qXXxWeswygCh0tSYp/X
OSQ3LAu9zXrCINiXdWDL1TPTZo+ko8x63+jDwltuQgNXolY7ZdYEzhVXrdaHZCpT
6l138AkeLCvZF/ctoWTzjUpc0xxSixjoIL+BW7VWPVwN/0Z/gzch/T08ZoSwBrWH
9TXeFV7ktMc7zzdamb98IR5m3ZuTUrl5sL7PrZ7nl4s+eXgSUWN49ysaPY9PQAxm
5t5eGy3aRF7R0EY7oohdelhxOBHdhF9rreuJzCv7EDHlYNHF8ni+wv5O3Y6G9chF
4oKMGLFV+f4Wl/gvUtlXco9Y/XiPBCv1kWZHw1VE4zt593ASxHSbda3fPafT0tIK
SbqGvVQeMW3zwfh5bQadvZ9wfS7zt3fWsjjLT6Dhp5YXzD46Jc4w2SlFTNAwWbkR
RbTe3IIXuRqhRNOLSXj4lU/31q67Z89ge4fz+sd7I7sPYtCJ9Yi4Z/ha8yy89iaE
VkcdbhZ9qOy++YiofQWP2gNZHCv5pP1TMkF2j39SYZC/NlFU1zwrD92EybBTTH5n
wc7T4Ac3EAkFbZ/ZPIQhLxRP6aI7esSoKhZkoExWI55HqHKE99DnWs1OJBHOjTcb
hYEU0whuT6yavhqI2ty3EU3bxizNbVScJSR6fTokrRxt82xXbR+xx6twWTtOzVe2
eWUYpt6PMo3apZtqGFx7O1Ts8bm65k2u7v7x8r2h4zXJFntudcbpkqaUQovHK2g5
QwH0KPxz4NkSxhmiWVQOoyJiqC6YXIyvbtX+RNno3K7EU1b0xeozs2oRn0xKx6SO
9sWlggoKh4/xGtbBQ6v2+nQoutQJesPmPI8CpLdXRR+5UBMWj4lsi1thC/MTM2s+
Ci1u6XU2C+a1MnWdMZZzuM4EYxsS/brmhnBYm8WSTYVA3IbR53DnRWE8/rzCHSXY
wMfQgoLswYLWEQ5dKc41t97pRk+v7/omZmcryxVjPcWGJlsT4tsVN5BMmn+I+CVK
fPwrMWuZ7DMcm0ywx6d5Oq9n3PxRa5pXUsWqmr31wktjx+hJVigSnsF/afRCIY6o
bR6qtfiy8bJSrMCJxn2u38iTZ99NsqXeB45XRTbrY+x2lYoChvZ0e4Tk6M1yz7VP
zyzflU99xlNifzHtxwp3LH5tm93kuCPgpAUaUZ3XOsd6S7e/fKfUwWDvWeLn1mdr
4u2b95OVX930dCqORiFraLU9+ryIcNS8dI/UILhpPSK0hd5Kpt5mU5rcaQ/uZeYs
3x4h3HvWk9jwBKm8LPwHC69H5+uMt9PpCThnTmB6vcwLLjBOBNhv+cMgETs7B+uf
oaznoZRW+oayimAVY3sHMxtrMCMDHSMLHTNYi1LQyczSCMzIIczIwKl1GyzvpG/v
6A6WE74rZGPtaOzqePvPrCD/GAmlMBcTAxMjAwsTJyMnAyMLgwYDA8Xp/39KQswk
AdZl5OxtjJwMje3BfzBRANMLnZJ2PKUgrO9oDP4jz9NAaRuj7+//slTjam9sApj3
YUdi+BNgNlbW09xMwGdhLOycgGGmP2Ksz8MYmBk5WX4IY2RkAnT0dzkGBsBI0N/D
mBnZf5JjZuLk+Ck/xp/CGNjZ2Bl+DGNj+YkfEycT04/PYGRk5vhJjomRjfPH/JhZ
Gdh/DmP9OYyNgfXnMNaf+DGzcf4kx8YC2LX6MQww7fT3MHY2lp/4sbMzsP1UttNW
+VPYqaJ/CuP4WS9MDJwX6IXlR90zMbH9pAMmJmbmn8PYLgjjZGL+MYyTieHnMDbW
H8vGxMnJ+GMYCzs754/tioWdg/HHsp2GcXynP0d7fTNLY/s/Oo6imftpf2AH0yvY
2DiCAXZARxG3NrEBn//TJ+LCYE0wDwcHu4mJCQcnA6v+aV/kZNdnZGNk1WdkZjMx
ZDVkMmDiQ/qvRc4MZDk4nnb9PzocC8dpbSORkYnI3kVCBMmDQCBZeyMza317N7CN
tTGti74b+I6MrModsI0JWMle39rBxMbeCrgRsrGyPS2BEdjahu40xpaJXtIA7Gh8
Wi4rY3tqsKOZlTHY0MbJ3gGEBKKBAv0EWGgQ6OQUP4b//whADxAdwZ46LhDG6S8W
6AQEdfrf4akDJMpANOfx8H8l/QNY5+5HcIMQTn+BjAHH80d6pFN3qnoQDOjsuf8J
COAHp1JE/xMpfjV4QZGnT0UBoX1XDvTzKxAP6Anix/zOf/U7P6AZiB/7Oz/Od37c
7/zXvvPjnfsBXP/O/xL0GOpMKyin7nt2kJTf4y/GZ7x+jIeUAsLrx3hIyS7O/a/S
QvBjPEQD/xQP0co/xUM09U/xEO39UzxEo/8U/72WL4r/XvMXxfOd9wio09r4BIK0
2bOQv9ou0HPgQGe958qpA/oGIuisRyCDzmoSFXRWm0CNAbUCaB7QLqBBQEuAJoDS
AiUCWAPMbpw6/FNHcOoITx0/CAw6eyLw5D94wwNpz3gDcUCYwB/PORtb7Y0dnCwd
HS5KCY39Z53/lRJgIX2awszWEhhkrWz17c0cbKy/z+BPIJxlBmQAXAEInGV9sTCk
l19KGFDppYUB3V9aGKikSwsDtXlpYaDaLy0MtI8LhJHAYNDPwkBD+l4YGfwfhIEW
d2lhoGleWhhow5cWBhrhpYWBXnFpYaD7XFoY6GeXFgY65KWFgZ57aWGgm15aGOiF
lxYGBo1LCwOjy6WFgWHo0sLAeHVpYWBgu7QwMAJeWhgYKi8tDIypFwjfBYmdjijw
p8XXAxrxb/zGb/y/AShoGFg4+CsIiEjIQMf/t9A9/U45mzb9MXCc/gJDDHAHfIrv
QO1AwZ5+I0E+y9e9zkggCJxd8c6vEGzwn3sEvg/9Cxv8kHx+9RUoAwBd0NmXF+Qe
+FY6K9kZAD9kEIXEAQ7IZefUAzggLTCgQtIN/PEb92ee6X+8CyGxN88dEJsB8gD9
lT8gcXxy9gl/9zzsl0FFUeeop+qBAED8+ASEBzwYwF8UIEWDUJADO+tbOhlDMvj3
KN5Fr7ab7GY8owB1AQWIFgEKwOv1FrA64mjjqG/5t0/zfws8iBau/0wBoom/UXAw
M7U2MzEz1Ld2/EVEMM4pQF1AAWgZEArg06uqEpjJCOzscLY2BJaUPb31grsDBQcF
hXTn+8Z6WWzsDkubgjv4z7UA/pkCML/4gQLz3ykw/zsKepOdFfwYLbXnWriAAqS3
fUeB5e8UWP4dhZf0H/jDAyfPKUBfQAGYC/1AgfXvFFj/HQVbHC2xN8yD5xRgLqBw
+s32IwW2v1Ng+3cUXm9oe9gfz51TgL2AAjBv+4EC+98psP87CvkxKFbmJzPnFOAu
oADMBiEUgO/dX94jhpt8cl09TvjPKIAIfqYAzDF/oPBrewQNquQkLRgaMi5cQAGY
uf5A4df2iLKV/vubM7jnFKAvoADMh3+g8Gt7RE+2fp5iHco5BZgLKEAWCL+j8Gt7
RHf/ItVx541zCrAXUICsQX5H4df2iFkbRjuZQ8xzCnAXUIAscwIUgLnlL+8R9gtR
mtdyevnPKIBu/EwBspL6HYVf2yNysJ9cX2qtP6cAdQEFyGLtdxR+bY8Age4JP53M
5zujAH0BBch68HcUfm2PAJnC3SvhsDjXAswFFCBfl99R+LU9opLkg1eLouy5FmAv
oABZ1f6Owq/tEaAN/5PQJuJzLcBdQAGycA5QIDy9CtrbuFjT3rWxd3BzvGcM/vcf
1LVcfdiyLl/PKYAIf6YAWZv/BwpykJz+2/A+RFbRXW45pwB1AQXI8v+fFPTtHS2N
HR1/QfnPwE5M+e0bPx3kHXEBBcgOw08U/n35z8BJx0W9mNJ8rgWYCygATfB7Cgpg
BzsnfXtjI0gW/xYO+RJ8Mh7r5xRgL6AArOFBKADTPTKwnL2Ngb6BmaWZoxswp7B2
srQEi0Ey/O/jjALo5s8UgFfTf6SgD/wjRdb6jmbOxv+CiTrkk+UCCoDyv6egABxi
AR5t+ycTM+N/M4+C4IwC9AUUgO2r7ykIm5mYGNsbWxsag82swXfEhQwhefw3EcL1
KXHjtTPkk+VPCpl/7jEDMRBpCAXI/feD4eVSQNZuAVwuBaAGCC6X4jcrAJdL8ZsV
gMul+M0KwOVS/GYF4HIpfrMCcLkUv1kBuFyK36wAXC7Fb1YALpfiNysAl0vxv5sV
KhgD+q+JNPx5KOAnBZ0tvGGc3oBP3fB5PMe5zK1zGeAKzKeAq+X5Nfz8Wnx+BYMv
XLKDhoL6a5nkD5mf19R+lvl50etnmZ9XpX6W+XnZ6GeZn9d1/iYDAPiFrB8CfkC7
gJ4gNQnUDxAGWeD7UQZwQI0Bu1CQFbgfZYA8AD+wRwNZIvtRBvADGyjADgZkDetH
GeA5kFOLkEWmH2UAHjMCnN7AM6FB8388e8Yb8Y+W9c9HvP881U0GFhJmYr1nBrr4
9DYc9N/b5v/PAPQA0RGg9bPT22unygEOFfzXp7dPJf84ofsjuP+QBvDXyW1I6wFy
/E/46+T2ZVP8avCej2gv/2jNkJb/+3Tu34ZtoJRAZkAGkBeAwFnWFwsD95cWhrxA
LiX8+3Tun0A4a3GXFgaa5qWFf5/O/RMIv0/nfgeE36dzf+M3fuP/dPxxOhfo8r8G
kNO5MKA/Bg7Q2elc4O7/jdO5QGnOSnYGwA8ZRCFxgANy+c+ncy9eFvgR3z/rcikg
QzeAy6X4/iVwuRS/WQG4XIrfrABcLsVvVgAul+I3KwCXS/GbFYDLpfjNCsDlUvxm
BeByKX6zAnC5FL9ZAbhciv/drFDBt6HOVoKAfCAxAAtS0NlK3LNTlwY623gD4sHn
MiSgs403ylMndX79fhNO2NCRlp4W2INDgYKCQYSCgYaCgTrf8zrfgzsX+X4L7gfB
8424c8Hv9+H+EgQA/NZRBaS4ozT/tNsEAFI4OQ5OfJBa1k8ygAPUdrZDhiE/QJb7
084WkAenwIw3cIUGwaAj/CF7BqY/VPhPQPyjWv79ztZvu0R/AdDDxXaJLrez9V/b
JQJS/d+5uyXxx9MZz8sBOKbzKxDP/J2f5Ts/63d+tu/8L0GtoLPWD5To+1whEt/j
ryed5fdj/PdPvwjfM7oIEJYQ/BgPYf5P8X/Z40H9veP393cBUEogMyADyFtF4Czr
i4WB+0sLQ95KlxL+veP3JxDOWtylhYGmeWnh3zt+fwLh947fd0D4veP3G7/xG/+n
4/eO34VXoAwAdEFnX16Qe6A0ZyU7A+CHDKKQOMABufznHb9/sscDvL0AB8T+9VeD
AIA8gL8a/F9ij6exISddmJReACD+z/Z4vqfwy+3xpMnReGDW3zn/s+5/sscDofC/
0B4PAkQLFxjDgdD4G4Vfb4/nrGX/sz0eCAUw6HtbC3+tGSH9uMLzPwOTP0BSd64F
8M8UgPnFDxR+WpO6aJ3p0kAeSrXldSc9p/BP9nh+oPDTate/ojDZsVT9QIf1nMI/
2eOBUPi7GZhfVBGT2u8khN4dn7eFi8zAnH6z/Ujh11aEYHni1EQ9zHmPuMgMDDBv
+4HCr62IvvereEp0ECNZF5mBgRi+Bij83frIL6oIyNroeUVcYO4BmGP+QOHXVgRk
6fW8Ii6gAMxcf6DwaysCsrJ7XhEXUADmwxAKhKCfLE78+7eWPV8rip09LGSAvsDQ
ATBB+Q8U/r3RB070Gn2Mz68gFXEBBWDu/jcKv9rohe6b5K954iSQHnEBBWBF4EIK
/778Zxgr2n2m+qDiXAsXGb0A1hm+p/DLjV7QrNKA9u3mzylcZPQCWL2AULgJusDi
xC8wepH3P9h7Fzi5jvrO93/mpdHD1oxlYWODXX7IlmTPuOc9Y2xr9PRTILAMhpCV
Rp4xGpA0w0wLYeDGEwO5vHaRHZywm4QVG7PXdwOsHPKxHS6bndzd3ODABW9YOc4u
uxEJm0AIQcG7gV2Sm1vfevSp7j7dc9TT0xrh85NqTnW9zr+qTv3rX1X/qur7u191
LSLp0AvmRKqSsNhDL37vlpxO+37PoBNIQLoMSTgHh14wfxOSwF63uh568fwP/93u
X9u23ZVCduhF2hgZVSBdjIwqkC5GRhVIFyOjCqSLkVEF0sXIqALpYmRUgXQxMqpA
uhgZVSBdjJCqTK/OhMFQbAvp1fnTIJqD0yBy+nnfkemxST3kVnmVn5jNM+jbMfaQ
6jd6cmr3rjvVRmw3mOMzbtgkyXpz2YkQMSiH8hMhfqALh0Wun7gQsd4cs6MhdEhz
51spkk6EYHKX1CrBa8zEOnNpY9Qb5SdCYM4f/TDS3zt24OihsZkEDbEC2m144nr2
NmpTTQ5MoNSB+Z06sOelqQKfQ20wfmKUrjIqGTeeNjDFvnM2P3nY3CWs9hyayld4
UaYcVkB7phwWoD1TDgvQfu6Uw9pbMuWwDBl+ikDzLmICDjCBWoBy2D5BxCj1SUK5
UtZyefoyIS8IYjyBE50IV5Mhjew4iDQxMqpAuhgZVSBdjIwqkC5GRhVIFyOjCqSL
kVEF0sXIqALpYmRUgXQxMqpAuhghVReo94idCcKVt2PaJV626tbmNvcbP9wAkyuF
5SSzuGSWmR5mPWlVdEGwnvS738hPPHnHG8rWioA/X6H5LM9XqN9aUXbGQgzKofyM
hU5Ju1bEZGzyWhF1S8LM7J+f60XMaTaZmwp8KxlxT/xPmPsK+JIxYSgfIkQYMwnx
mQUd2ZoUgVIH5nfqwJ5RpgqcrUlVCZytSRXQnq1JBWjP1qQCtGdrUhkyvKxA8y5i
Ag4wgVqQrUlVN6RR/cCCdmfwjXd8AZ7s+KIDd6cFqI12dLnJBakdfhis02frXWf5
pjP/qXgS8moGmc4nsHh8+mcO5ne8sWPUkhAlkEC3FJJQ9z2QN/U9/lvfn/iWK4Wm
BBK88SSgceu23h2YyB+bmDiiDk+MLeqwAo38x1wpNCeQwJcRknDP1LGJGfXA1JEH
J8cNIYcmD0/mfVI1YOX7rz729db3OhJaEkhguBGScN/0dH1JuG3f0NUf+83HHQmt
CSTQEkMSdtX7c/z5P/2j8desEkdCWwIJDI0SG+WuOjXKK7+yf+W6bS+6z3FFgYTk
mTRPgv/tOQpIF8OLfSBdDLLvkS5GRhVIFyOjCqSLkVEF0sXIqALpYmRUgXQxMqpA
uhgZVSBdjIwqkC5GRhVIF6PRVJ3r9Wy/r7El2Nd4q1S7C2DPTnsVeH4iPzN2WI/x
zMK1XbLeN856tiQvXGebHGNQDuWbHLn2ukXSXA5wNtde+6VVUqyGeNE6bYx6o3yT
I/k+fxaUs0PwqwSu7xJzAe222lMHztaUC2jP1pQDtGdrygHaz92acnYIfoYMP13I
DsFPfHphfZ9Yycv/Jjc2ZxbYPRP1fhhSqX4IfvKItBThu9LF8KwbpIsRdgLpYmRU
gXQxMqpAuhgZVSBdjIwqkC5GRhVIFyOjCqSLkVEF0sXIqALpYmRUgXQxGk3VBerS
yM4EEcv7QMW1YmfiPqDNJ6T8eE4/kb1B7LoRT3OkZnCg5sMXRByiad3tnsPgtE3j
8PBFJkibP5ATx67SUF1BKGD+Pn/o+W98YTxxtYkyMXl5ccXzp/48VxYGQ36ZWFZ/
/q7px9Q3ysKQht+F2XKWuzCXaGUr25IZg3Io35LJtdfpVraY3U1e2aKiSZhJ+fNz
desuIb9vsBkyuNc98d8b2O8L7G8M7G8K7MXXXoep+hAh4jfZ9Er9w7cnIaQoCZ5K
j1J/T3kl/3gL6dpsxa+4LyCXJEYCvlcZtUknB+Z36sC+V0oVOFvxK6DdfnGpA3uW
kypwtuJXQHu24hegPVvxy5Ahw3JHtuKX+CQPYJ9Yycv/Jjc2ZxbYPRP1fhhSqb7i
V2kXaeVrr3Fhwxq90C7nVjdsuCh6Q+evbR2F8MrXXockoCpb12uvn7rt73p/6W2X
uzskK1177Uk4h9del5FQ/2uv/ebFStdeexKUmOttwzmj1XbOaLF44SPzrhRUOQmM
L0pIqDA91VE08ZQa/+yfajxz3JFQ6drrBBIS5r5qJOGr4DvvciRUuvbak4CYVfeK
uOymO26fU2v955hw4bOW2UpJqG9FvPKSv/8nf/7AOv85JpDAuC2BhPpVxOafXbnj
scf+1xZXEQkkMBr0JLgLn+tbEX6y1FVEwoXPjDFLSKhvRfi5WFcRCSQwck0goX4V
4ad6XUUkkMB42JPwaim7c3rxvdbzG16v/u6Xf+ArIuGqYwYoVUjY41OqGQ8O/MkH
rv7iN31FJJDA2L2IhHpfe/3gD1bc3vs717lGWena60QSFp9/i4Fo87u/8Pv/0pVC
pWuvQxLqfuTD3zz0ofve9Mt/5UiodO21J+FKSbhzug7XXs9/4Z+8/jZLQqVrr6uS
sNhrr+9551//w8LXXocknKNrr0MSgrM36nPt9buHe97wf31olyuF7NrrtDEyqkC6
GBlVIF2MjCqQLkZGFUgXI6MKpIuRUQXSxcioAuliZFSBdDEyqkC6GCFVmV5dNb06
fxpEa3AaRI8k3lywZ2fX9oeG0JWzanLbht9ww6Z9R6bUnff0bpdkPbnsBIgYlEP5
CRBcc90qaa4uOJtrrr3ORyV4NY9YRy5tjHqj/AQIzPmjD0b62ZUCJjBVkjrwgtpf
/MT4KwV8ZdvAFHt2pYAJnCmDFdCeKYMFaD9PlMGyKwUyZPipAs27iAk4wARqQXal
QHVDGtnxD2liZFSBdDEyqkC6GBlVIF2MjCqQLkZGFUgXI6MKpIuRUQXSxcioAuli
ZFSBdDFCqi5QebEzQcy5+rczLrhW7EzcRrHX9vIbf9wAU01uJcmeCe4OBF8RLCXd
8fM7vzX6j8qXgIA/WqH1LI9WqOMyUXacQgzKofw4BW64TrdMxDxs8jIRlUvCzLWd
n0tFTGc2yTtdPjAz7ol/8Q3XYSgfIkQYMwnx8QSd2XIUgVIH5nfqwJ5HpgqcLUdV
CZwtRxXQni1HBWjPlqMCtGfLURkyvKxA8y5iAg4wgVqQLUdVN6RR/WyCdmfwjTd3
AWQ8NnfRgbuDAep3w7UfB+v02WWXcJ8vBIYk1P2G6y8eG7v677/7Q0dCpRuuQxLq
vt3x+7/zzrd859HnHQmVbrgOSUC5tv43XMvBeUtCpRuuQxLqfsP11y/9w489fskH
HAmVbrgOSaj7Ddef6nnilTfcND1qSah0w3VIQt1vuH7dmYP/z4NfbHUkVLrhOrFR
1uuG670f+MyXW0f8hevZDddpY2RUgXQxMqpAuhgZVSBdjIwqkC5GRhVIFyOjCqSL
kVEF0sXIqALpYmRUgXQxQqrO3VK2383YFuxmvF2q3QCwferw9OShiXF1ZKrb3AVw
gxp7MK9HedMT03k9ylMs6hw9ZJZ1JHnxOtvjGINyKN/jyC3XbZLmLoCzueXaL6GS
YjXEC9dpY9Qb5Xscyff5s6icnXlfJXB9l5kLaLfVnjpwtq5cQHu2rhygPVtXDtB+
7taVszPvM2T46UJ25n3i0wvr+8RKXv43ubE5s8Dumaj3w5BK9TPvk0elpQjflS6G
Z90gXYywE0gXI6MKpIuRUQXSxcioAuliZFSBdDEyqkC6GBlVIF2MjCqQLkZGFUgX
I6MKpIvRaKouUDdFdiaIeVPvAxXXip2J+xVtfkPKT+PcqA26Zjy5+panOU+zZzw8
TLNn/OGmKGrdGrVGEYtHTVGzP3iztyhgb+WAfUUB+xIDAv6+6X3Pf+Tp//aDxOUo
igq3+1/Mrc3v+kpZGAyFx3yznGg99ju/vbEsDGn4HZptZ7lDc8mXvrJ9mzEoh/J9
m1yDnW7pi+nf5KUvqpyEmXo+P5e/7DXY73X5wEATT/zR9/T2nwvsDwf2ucBefA12
mKoPESJ+k02v1D98exJCipLgqfQo9Z9bwD/eZ3pRtiRY3FmQSxIjAd/tjNqkkwPz
O3Vg322lCpwtCRbQbr+41IH5NFMHzpYEC2jPlgQDtGdLghkyZFjuyJYEE5/kAewT
K3n53+TG5swCu2ei3g9DKtWXBCttNa18DTZyGrva6IV2Obe64am1A/lNB68ZhfDK
12CHJKBPW9drsLf85F++9JGtv+vulKx0DbYn4Rxeg11GQv2vwbZfduVrsD0JSsx1
t2WTSknzP6kxv+sdv7Xre6+Zd6WgyknwY7uAhLLpqkWRsPc+jVvf40iodA12CQll
E2GLIgEK7vsvH3ckVLoG25OAmFX3ivjTV73irtV//fvuW6h0DXYJCfWtiC3XXNr5
uZf+zpFQ6RrsEhLqWxGf2bzhr7Z9otM1ykrXYHsS3AXQ9a0IP23qKiLhAmjGmCUk
1Lci/Kysq4gEEhi5lpBQ34rwk76uIhJIYDzsSXi1lN1Bvfhe67GV1/zq959a4Rl0
wtXHDFCqkLDHp1Qz3j/ZdmPPex73FZFAAmP3IhLqfQ32l29f8zdf6rrJt4gEEpgR
SCRh8fm3eNW7bvjaqz8950qh0jXYIQl1PxfixFNf/cLaracdCZWuwfYkXCkJd1Av
/hrs1/zxT36935FQ6RrsqiQs9hrsp1ZGf/S/FrwGOyThHF2DHZIQHNBRn2uw5//g
jb9x3RtHXClk12CnjZFRBdLFyKgC6WJkVIF0MTKqQLoYGVUgXYyMKpAuRkYVSBcj
owqki5FRBdLFCKnKFO+CMBgKbyHFO3+exIrgPIldkkqpboPavqO//+DkWevUZcdJ
xKAcko+TWCFpdOrO5jgJrx1FitUQ69OljVFvZMdJZLpjYgJnumMFtGe6YwHaM92x
AO2Z7liGDBmWOzLdscSnF9b3iZW8/G9yY3Nmgd0zUe+HIZXqumPJ4+lShO9KF8Oz
bpAuRtgJpIuRUQXSxcioAuliZFSBdDEyqkC6GBlVIF2MjCqQLkZGFUgXI6MKpIuR
UQXSxWg0VfGqFlOh3gcqrpXzclXrc0+97S//v69UX9X6qz+4aPdvvO3/LguDofDM
qpZs+fLvvup7t5WGIQ1/nMSKszxOYqlXvrLTJGJQDsmnSaRb+Vr4NAmmfM/P1S97
msRjLh+YX3RP/D8R2B8P7L8U2H85sBefJhGm6kOEiN9k0yv1D9+ehJCiJHgqPUr9
PeWV/OPTJNZlK4LFfQW5JDES8L3OqE06OTC/Uwf2vVaqwNmKYAHt9otLHZhPM3Xg
bEWwgPZsRTBAe7YimCFDhuWObEUw8UkewD6xkpf/TW5sziyweybq/TCkUn1F8OxP
k0D0YjvekpwmET323Ffm/82OUQivfJpESELdT5N462e/+577//Uf32JJqHSahCfh
HJ4mUUZC40+T8CQoWYK98+orf/7Pe3b/9b91paDKSWB8UUJC2WzVokj4qsH1864U
EkjwQ8uAhLJ5sEWRsAO0bHEkVDpNwpOwJKdJfPXIpne3bfya+xYqnSZRQkJ9K+KD
q/f9wcFLxLWISqdJlJBQ34p45sz7Hp778cWOhEqnSXgSluQ0CT9r6ioi4RwFxpgl
JNS3IvykrKuIBBIYuZaQUN+K8HO+riISSGA87El4tZQd5bD4Xktd8fETv/7pyDPo
hBMEGKBUIWHxpylsuf7itu9f85u+IhJIYOxeREK9T5PY+G9HXv/47TnfIhJIYEYg
kYTF59/i4Md//G92/s27XSlUOk0iJKHup0ms+7O/+ehrH/xLR0Kl0yQ8CVdKwlEO
iz9NwsKSUOk0iaokLPY0CYs3ewadQALSZUjCOTpNIiSBTWR1PU1i/H9846kfff4N
rhSy0yTSxsioAuliZFSBdDEyqkC6GBlVIF2MjCqQLkZGFUgXI6MKpIuRUQXSxcio
AulihFRlendBGAyFt5DenT9Noj04TeJ1klqnbnCkmk6d2njsJjUyeHCTJCvXZcdK
xKAcko+VaJc0ynVnc6yEV40ixWqIFevSxqg3smMlMiUyMYGpzdSBqfbUgTMlsgLa
MyWyAO2ZElmA9kyJLEOGDPVBpkSW+PTC+j6xkpf/TW5sziyweybq/TCkUl2JLHlg
XYrwXelieNYN0sUIO4F0MTKqQLoYGVUgXYyMKpAuRkYVSBcjowqki5FRBdLFyKgC
6WJkVIF0MTKqQLoYjaYqXt5qD3yg4lo5L5e3LvntZ7v+4KPVl7da1PAHW//qz8rC
YCg85pu/8s1jP7rkM98vC0Ma/liJ9rM8VqJhS2DZ+RIxKIfk8yXSLYEtfL4Ek67n
5zKYPV/i/3T5wPwr98SfVu/tnw3snwvsnw/sxedLhKn6ECHiN9n0Sv3DtychpCgJ
nkqPUn9PeSX/+HyJi7OlweJOg1ySGAn47mfUJp0cmN+pA/vuK1XgbGmwgHb7xaUO
zKeZOnC2NFhAe7Y0GKA9WxrMkCHDcke2NJj4JA9gn1jJy/8mNzZnFtg9E/V+GFKp
vjR49udLaP5sNugtyfkSP/uLr/39F/799aMQXvl8iZCEup8v8eubHrzpl5581G1f
rnS+hCfhHJ4vUUZC/c+XsF9Q5fMlPAlKlmA3/dw/Bd/9t64UVDkJjC9KSCibtloU
Cb/186+9/Du/1THvSiGBBEYtJSSUTYgtioT/dsndP/fUt/3JCpXOl/AkLMn5Ej/z
3fc9OvTH39jiKiLhZAVeX0JCfSvif7T+6ed/6Z/+jSOh0vkSJSTUtyJ+8cy2rr/+
yrccCZXOl/AkLMn5En761FVEwskKjDFLSKhvRfjZWVcRCSQwci0hob4V4Sd/XUUk
kMB42JPwaik73GHxvdav//XW/P/7+R/7ikg4U4ABShUSFn++wtqJ//TiX171nK+I
BBIYuxeRUO/zJR5916sGfuEXb/WsKYEEZgQSSVh8/i0ee/PmA//8Sz+8zZJQ6XyJ
kIS6ny9x5p0n/voPDvypq4hK50t4Eq6UhMMdFn++xB1D83t/4kqh0vkSVUlY7PkS
1/zDZx/7h3+4330Llc6XCEk4R+dLhCSwrayu50vc8exNd//o9be5UsjOl0gbI6MK
pIuRUQXSxcioAuliZFSBdDEyqkC6GBlVIF2MjCqQLkZGFUgXI6MKpIsRUpUp4AVh
MBTeQgp43xptn7PFvlJ26r8F1bkjU91q78x07013H1D5ifzM2OGJmRtUfvIwKi1H
Z2Yn9h2ZUjvGHlI9N4z37xsf3Dfep45Oj4/l9bAwWZVOHhktqsuXOwplNDcqqyXn
Pv41zjA/SWV92pnXZ2ZZGybJmNzHXgrqk2luWqT69Aoz/Q1onJubW+W9zW0FNxrn
Zv37vc2kZuEbdAjS/Cdyv/vFW0nBK8wBPigMEyjerTQVD9olU5A+DuYnoqT43TAU
b4fOv3/ha0EofD3ssTbWvTiU9yF33g6/Lg7l815qLw4FDR6hPTkUefJ2WlbyG6HJ
28vzyJS9h7eXp+XrEnh7OfXkGkCXt1dOC7rCb4RQa4q0pP2XSF2OTjOx7n1JB4Or
h/XFlfcn+/pOxvqOlvia7qeir+98klP2ip7JvvhQB8b3XaW+fgkt2RcfyinZ17cP
43us1NermibH9UqopXHXzt0S/zC+vpdjoRu7Ye1RHLsUK61rR/ARv2QEFoqYp2Ee
Gh8vsBlA0mFyviJLwWu/HbbOEhx3MR8rNOGnCx8kWDtqs+jTTsoibsTxhVuKlSZv
RlJKyCfv54kBlfPpqzbpHbw7TT59flyPW2N++BwQkNTdr1tsplh/qlemQrn37DPl
KqlvcfmpZyX5oLXlJ6ykRWaqnpUUdo9nnylXSf2Ly089K8lTUVt+wkpaZKbqWUmh
3HH2mXKVNLC4/NSzkjxLry0/YSUtMlP1rKRQvDr7TLlKGlxcfupZSYQHteUnrKRC
pmzQs81UPSvJS8q1ZcpV0tDyqSQEKlBbfsJKKmTqXFbSh50tVi9td7NCkSaXIcXe
mbEjsw9OzRwu2l1Z+xSR2Bmi7zRbU0BTXJ4vd1AM4Sxa5RkiZjMxpTMS1cybE9wy
s7TmHrGNGHsp4AkbsegWyAxRCML/i5ImXurmmQDKdB7xDBGuKvDxnQxtDSw0QwQ/
I5zfYOZRZf7h4XD+wbOpUacxRIh4/oFUk309I0z25dvvrOgLK0OXK9kXARw1q2Rf
GLLXry/3pXZQTkr2pazQxU/2pRdi+1iyL3XgS6Xcl28E9fFSX9sn+Zr39cfzQRfC
MI4onn8IvxJQw/yD38XoXwdsj1EO311WQrX5B97ju12/j6w0i4TBHna75Vl0YkRh
qG5TSe5xT5n4VJaN0bo1qpz1ekoWtAVQmkXfgqpnMXFKono+aSIkHkRbVS2z9ZE4
bGY9FaWZ9QyhemZdfRZG9dXzGdRnXwPrE/4ESrMIYQtnMXH2ono+S+uzr4H1ybtB
aWY9k66eWVefhQmA6vkM6rO/gfVJnwFKs+h7mupZTJzoqJ7P0vrsb2B92lMRyjPr
O87qmXX1WZgrqJ7PoD4HGlif9OOgNIu+96+excQ5ker5LK3PgQbWJ2IJKM2sF2aq
Z9bVZ6pphaL6HGxgfSJbgdIseomsehbPevqkvD4HG1ifXrwuzawXMKtn1tVnqhmI
ovocamB9Iu+C0ix6Kbl6Fs96pqW8PocaUp92Bibc4LtGPSlxNsMJJ+y8FSpw84My
7OTD2+l1vd0fyYEd7u3t/kAN7P68DOz+OAzs/rQL7NDj7f6sCux+vqhJ7HxR5aO5
0s4k3Vx89E42X7QQKIbq80UYCu81kTXHo3jMfp97Zmb5mGrzRfC9jVgS5ouu1+bd
JQyp1M2zLPZ8ejAnYueLcP1B4OPZD20NLPV8EYfVkC6ugBDxfBGTEcm+fPBsG0z2
5dvn4LFkXxjvlQm+th/y5eTLjTfRD5GeaWZRPLviw+KHKcyuHDFPTwLRdSO8E/sj
2OTkncbJIZI5mdHP0ehDJgz8Vq04fQf27QRo2WPc36vNwaYnjb1H//lQdMtd2Cna
jpXTZWk+gaX1WRMeGp5ttTSQ5vE1cZon22yaW/SfzzbvuKuQiNh0oPl0+ydNmB9q
86WWS817SWfP+jidjtVxOt9sLU9nTD/nLps2Yb6uzTfbWkw6v6vN/IU/Nu4D2kxf
mSvLy6R+dnTMmTDf1uaO9g4T94vanOw8c+dLcn9z8SwWpa9M7BhhH62ksl81KLEU
eaRNU0lj/apByfLJQzUoyej0OJe0dMr9mvftxYwdODShth4ZO/TQeybG5cIo2jGW
H1OzE/lZNeZdL4oiK9TNHj18WAuHckEUKbVLmnn4k2FWBj8KATtxvDc4MGV88sEH
u9XY4akjb1OHJ7REqTbuUbeoXHduYNMWuYHg8dbx1VFUsqE/PzGbl3Xm7Wrjjl1H
blQ7do1vguw0hGydmVD37pgNT3A59JAhie3J+SJSuvS73Tb662fte9eSRuA4mx/L
T87mJx9QGx+YmpmZeCA/oWm5ekloseWfp7YoFqWF7omx/GET8sBE/tjExBH1wNSh
o4ePzG6SV5tinJidHD86dkhtPDaZPzgZeF9u4nOQjqzw9e1IW4PXa48ePjAxY07b
8S+ZJYsuuioOY/Km/c3JPJvksig6lX1dKWo0+7pq+7riEb0/RjES+7UBOy4vR/qV
rPeJP+X2Iv3Pzrxt1BxzRL9zVIu6u/V4+4DcJI+6JZ8Tepz9jA75nPZ7Qft9T3qM
+6uidXJTdJ3cF10gB6L1ciyy7k9Ga+WZ6Cp5MbpSfhRZBZumpg65qOlaGWy6Qp6W
/iiePgF+ipon9CAVMYToFCv8jogtD4YBo2JnOpgv2S12bgC/A9rcJFbAf1Ts3AMD
gRNi5wmg4xmx76CsnhObDuYFsekwd/E9bciHkcoiOycBHWzgus7Fvy+y8fA7ENm4
zFcci2xc8vBkZGng3c9o+1Vi5yhejKwwT/5/FFm6GFQ0NcWS4EVNdmMYA4bBJltb
tB4/9UR4QJlhqFnkZdLEThmcpcjfbz6vJ42ISjJzq07fYSOWgzCM2k62dhRE4NG2
nLErbc60ibGTzukL7bCgG/sKVSQmhyAMWRhtsSI/4U+sVMZOkc9dPG/SwT66fn5B
2mS1pY10jq+O09l/aZyOemVxOgghVOXpV9owpLPnApsO9tOBffrCjqp5IX25In7X
vLY3TuSvBiWV01TSWL9aoaRymkrq71crlFROU0n9/apBCfHmCr/TpqmkNr9aoaRy
mkoq+3Uar78TJsjTTeSmVgncowWIrnuQ1/oHRrqHpTWKbtGyRS7XgwSwWUNaoujN
E7MEyXWPDPfnpC2Kerr7c/1qY0/PjWq410hZue6e4cFh/I7MSlMUvXaKvz0D3T29
JKq9h8q9773XBBoa6B4hUG/38IAJ3TM0bGnRkXWAkX7+nspKoamSCEWpgHqKUHv1
v3iO82d096rlbpnSXfAx7f5zRgSx+JDuB/6Z/v2EFl3+lRFfLE7qOL+t3f+ddnvO
uX9dP09p9/+qzV+YVSuLM9r9b7V5Wpd0vEIM9orNE0/ooWH8jNgVL8SmcbGiBulP
iRURCMdmMZ78/jmxIhPhPiSxqPTPnDsizxNi00BU+lfOjnh0Uuy7iPPbLjzi0b9z
YRCPELmwIx4xnYYd8eiUi4t49F+dHdnhL5ydnvKMC49I9LfOTuv3IhFhAGWA8SIR
9V9JJOKJKYhEt5lnOPH8cocXibQAE4sygX0uCsSyJkSc7zQVizhZaWZoFJQ0VsTp
NF84bGvHLtM79fB32HZEfbY7XihEclfll5sW31UdkqVug23m3xptLjJd07DY7sfr
9Hg2zxND3qAfO2we3uG7Q8/OYfOAvGM8OzcjZUlm56SFKbDzXvMMJxpe7ihl54xk
90s8ij8juTtfkq+WsPCsBDM0Ckrqz8I7jawOm9htBxF6DGEGEXr00tc/NMzw5VSK
MMms2rOfxbPqg7LUbQ1GvVLWagn/aXOGFa08iU17aZwJTL9D0rNmO+4pZ81wikqs
mbQwBdZ8nXmGKhcvd3idAS1TG3b8CDY5qdnxyRJ2nJVahkZBSW3suFM2i10vKVpo
XBNFuwpTQepWZSeSLoL9nl34ZFZMfLB4VjwuS93OOvS/V2g2rMTS69kwrRw2zNO7
edbLuhEoZb1IyxnrrRl84FuMza5hUdQnZTRjvRnOIZTUynoZJMNCvBaFFl33+Jn6
dnjtAgGSmSsRwPnAXFfrf2sSmCuyrFcG8PQmbXHwmwaaZdGbBm5OvG432zSwECiG
dJsGLo+soaJmnMHOModX5M7MuTf3yNJvGsDdgzTtpgFcWXDy8E2ftgaWetMAOSPd
ctV+XDdV9OWDRy5O9uXbv6GiL6yMIX6yL0uCXRV9mQJAcSbZl9pB06rU18qovgZ8
jUAlMirupgFHsYzqw7JQiCnIqH9ZcMbhEfPrZEGV/n6xqvREP9FcrIdDj3kZr4gu
NmE+RZhoTcF+Y1Nsfzaw72iO7c8H9re2rCnbFsAw/fmVdphOmI2tcfjfCuyjbbH9
q4H9/hWx/dva/pJcWyJnknMlNvceaft/JZX9qkGJzZ1H2jSVLB+/alBy/uevU5T+
Ul6lTaxA+uDY4clD3Hilh8WxayBsqGntZEI9hPLp1kPTB8eY2fzI98e/9Y7rZ9Xh
BAHFauxeFUXhEfLBQRxNEefC6/+rXBB3eHxwtkNZkP7iIP0JQQaKgwwkBBksDjKY
EGSoOMhQcZC9OmdqfCI/Nnlo1irs/rTl8NRy+kq2GqK2VivDoiDJZVgUJLkMi4Ik
l2FRkOQy9EHO4is5T3MYj/LoR+nAI7FfDVj8KI/U7Zkkr9D/rpWbnR7TdtkgB+Ua
+ag2n9fmP2jz37W5JLrG+N8cdchd2n5Ym+PafEGbF7T5n9o8bW6b7rSvcmlbOnle
K5bum8WuYMA4t2uzQazAw/oK70C8+aizk//POzti3n9wduL/d2dHNLwksnbyf3Nk
e2r0oejIcUcf6rCzIyaygxk74b7g7ND9grOz6P0/nZ3q8FN8RgjGzRkvPjH1R97C
Kb6U4pNdwDlhFnyxn3B2ZexSJj4hMatof0F9Wpqs+jQLxCea7BQZ9j3NsV1aYvvJ
wL6/tXxn5JB+drTZNMnCybZYrXp0RWx/PrDvb4/tZwL73MqOOzPxCdTDrxqUnP/5
65TPiL2ypEc3umiQP+wRQm9198TYEcX9Pd2yCtfenp4RdFC70FbN9TJHpq39Q0NG
21Vb+/oHR5x1sLffLBBr64C2YzXJ9ZBAb/fwcB89aV/3cE8Oy0B3b27QWkYGjddg
d+/wgLX054xa66nzh9TkjgTSQT07klbzb5VhgrDQC3Vtr9Ij5NWa16yWUW3u1uaN
juONab93aKaY1+Z/0+YXtPm4Np/UprwjoYOATp4Y3g7j5118QjBsmDx+yvnRkTA+
533kH46HnTijzk5HcrezE+eNzk7+x5wbHck7XFjekXd2OhKufsUOb/sFZ4fujzs7
dH3S2YHvSJhVAOQJ4zsSJTV1JGcLWMWvGpsdtz+CLbDvj2J7R5O1f1ib+Sa7/R/3
dzfHYTa2lB9BQEdy0u0RIgt7VsUdw+nAPu32AplsrontxwO7uqBSR9JoKDn/GW01
KDn/89cpf6L//mdtRga6c7kNavudDKfM7lxGWJq75oaG+4ZVfkppRpvr7XWufSP9
g9Yx19dfcB3K9eZw1dbegd4+5zqYG+pxrrnhwcEhNu5q+/DQYK9z7hvq63eBh0dG
hnwSvQM9uBq+3mv5+qDuCwxfHxlxfH3QcvrB7j7L6Qe7RwqWwX7bBb0MMpnceZFp
UM/OqxSMil4hN2qzTZv75RKZ0s8PurWqX9Edw2c0I/68Ns9oM6/Nc9r8oem8Tort
KPwnSRw6Jp4YOiYmf7GTt23ODtNHvGcNjA6DJRLc6YQ+6OzkjdsIfceEHOI7JkZK
vmNiM63vmOadnY7pOWenY/pDZ6difMdEhwkoV4zvmK6ShnVMDP70WMYwf7OLoSnY
xdBs7UYRr8VuXjUbWQP7fGtsP9FWvFHWj6Dmm+MR1ImWeAQ12hqPjs4E9hNuA60Z
Wa2I7dKOSm7WMdXHrxqUnP/56zRyId/3tolDU8dU/uDMxOzBqUPjW6TD76Szf90+
vcRHnQcYp5YjUcmM33KGpWX8F+t/bXKZNkq//3pturUZMLSgfHSh3KWZ7149Stin
zdu1OarNnKC0W8r42VYH4+cJ08egtMGT9JR7wlTJJ3YYMlwJO0weLoOdvMGgSd9M
bTl/frOtkFELjH+fs8OL3u7sMP6jzm44qrPzbXrGf4NYUK4Yz/ivloYx/lDLCzL3
B9vXlOsElDbTkT3BAPfTrkPAfU9TfLLBidZyxj8mdCDTBcafCxj/88G02FzA+HMB
4z/t7MQ9vkJljN+gHn7VoOT8z1+n/O/67/u1udedRbPC75+2f/3+bP236NdmeOu9
O2PJfrXZgZ0bGoK5IuKPDPSRGAJ6X79hrto6MlhwHenrHbDWHoTyNhj+MiImmdFD
HFhKRo8WWpuumTYtb7fLlfq5QT+7HKPv18x0u2awu3Wo+7V5QJsj2jyk3coZPcwU
Rs/TM3qYrmf0SPQwUAxrBbjD6Fn7wA1GjsKHZ/T9Ypk5jH678+d9HKnjGT1irGf0
Dzg77zzi7HDHh1zckNEz8gCUK8YzetY6GsToQwkfZjoaWUaM/bSzG0bs1jMMs24O
mLVb28B9rqX42BrSX6+fo6tsx0BRyGq7pkKRnFgddyr718Rh1AXxGsx8YN9/4Yk7
MkYP6uFXDUrO//x1msMn3q3N1vG3H53NT4yrPeqNRo23w4jFQ4OG7WkG2G9P0QgO
6cDW15fgmDNxjpjdyWatwW5U7snxdxgH82eAP6fOOQXJLB2KwFKydGT3VXKFNht1
2+3Tz1v18w7DAkXeoNnu/ZpN/6x+PqDNpLYf0WZWm3KWHsruxIdls7kOO3ljKRj+
ALvsc+6w9FudO7+RQHmStzeITQOWDusmbd73s84dlg4bxw6XmXRhPEvHDs+adfaQ
pdN1AMoV41n6tdIQlh6CxOwuyWByJrDPR8HkTFNsn2uO7ftbymV3w9JbA5beFrD0
toClrwhYenvA0gP7/pXLhaVXg5LKbEbJ8vGrBiW29jzSpqlk+fh1muE1TGdr1zYk
4O1dO3js7DJnhN7edQePO7vu4nG3PYLpiDlCooxRDhUYZb9l1UuVcjILxg0sJQsG
K8y/C7VZr82rtLnGSdWbNXvLafY1oJ+v0Wartu/S5m7Dgp8Qyx5hbzadWIL2BpbJ
E5YGT8AO26UFY4fdIsliJz+bJWa7OYnZLmKkZ7uvcXY4wVYXBra7y9nhK3c7O+Xm
2S7iJ8AN49kuUn2D2e5SgIZLsYnTSCILe9xxFNhPB/bpKLZLU2w/HthV83JZxP1p
h5KfBrbLdCBNM2+YXffIoDlIrre7d9DpvAz1uhXFgRGzWjjYPZQz64f93f0jRgvm
VD0SSWamJAqWmplWA/o2KzU7WymXaKO02aRNr7AI+VaJmaANGzNXv2CI8QuGftGR
dqmcHSa4ydlhgr3ODjwTZK8JoAwwngleJz81TJB+RlIesebt4ualTfjAPtfCMWwZ
E1x6KPlpYILIGMgw9oAyezRZ9b+naoiTzOJIA5xLFld8fNml2lyhzbXCUWalLM7L
eTwxsDf8vJxH+/Nynt9IB4tjWI8d/2udHVTbe9yimRfhC5uKN6jtO3oHDk6K3Txc
hiZbrqXOL1dU3zyMFA9/fMIZv3kzM8vTeO6BvRQIAEyW0YTYPEy9AnrV26P18sno
FYlufCChYfTmQQu1m4dxZRRNChg71Wd5FmahzcOAdgl/8HEwPynwZR8LDuDtvP/v
X/haECpg2oXxK+kUhwpHtt5O+RSHCuFDwctgH1U2NU+Hm5p7xKY1+s5CYOeLK4Jc
si8093nfmVJfSpi1qeS4lAHjaus7WuJLTgYTfK0Y6WsXX3JDWhPObphDFIuR4ZcA
ariFniR8N+dRrZsLO+VSxN2cDxTfQs97vKRMlYCkLOLmFwKTs0jezCa3hHzyfp4Y
UDmffgojKZ+8O00+fX74iEBt+cFnxwP5rpu6yNO4ZflR1NwU6b+LyiOCRr3ySFMA
teXR1VnhBnaLs80PI6565YfGC2rLT1Bnfcu3zmBBoLY8ujor3LJucbb5qWedwTRB
bfkJ6qx/OdZZuYi9Ru0XK6Dj4unjLXBiuChU4AYH8nZaqrfzlXs7X4O3U5Le7gV5
ZlA4oY1bFfqNDK9277pTbcR2g9mde8MmqSTTjxaSyxDK9KOZTH/eG9/ssZeiVKb3
FY+0/Rn96291o05yA55lYNgj5sG3YWV6XJHpfSi+HEB8TK0yfVrZeVhsuqMzoz5w
IDuPeN8yCZd3kFqpr2XjPq/4EgpRrJKEG5YLqEHCJQlPjIflueVYjITLe3xPRcGB
pCziFvZU5VmsrectzWc9JVyqGtSWn/r1vKV5XLqelz7eD9b81+Jn8CkNqCAkNe3t
vifl8GoOd6h8HF/ZZNnN1mtmYvbooXx27t7CoBiqT51hKLzXRNa8R2JWd19gz8zy
MPdI+m42xPWS/tw9WqUHLdt2s7j+IPDx0+i0NbBQNwt1hKOb9XFAlW724bCbZQWV
dMvPsMMV/pvsywePll2yL9/+bRV94XRbEnwtv/flhK/laHYtE/5b2kX7sCweYCrc
3El0zXSNEsQj2KR8pzzTbKPRh0wY9N/UCqsLt50ALXuM+3u1Odj0pLH36D8fim4x
p9RRtB0rp8vSRMKWVrtbHxqebbU0kObxNXGaJ9tsmlv0n88277irkIjYdKD5dPsn
TZgfavOllkvNe0lnz/o4nY7VcTrfbC1PZ0w/5y6bNmG+rs0321pMOr+rzfyFPzbu
DNWmryw/kgZVyI4Oe6Lft7W5o92eMPhFbU52nrmzcTd3KrEUeaRNU0lj/apByfLJ
QzUoyej0OJe0dGbXqae4wjy7Tr2269RPZV9XihrNvq7avq54CI24hqAXif3agB/g
lsILwpUQT4e8T/yNSxfpf/ZskI2aY47od45qUXe3rJcDcpM8avRPRE7IJfKMDvmc
9ntB+33PLQq+KlonN0XXyX3RBXIgWi/HIuv+ZLRWnomukhejK+VHkdn3IE1NHXJR
07Uy2HSFPC39UfGtVOikkCee0INUxBCiU6zwyyCe8mAYMCqxvgw7C70+9QGxan0I
+I+K1Z1hIHBC4vP5nxH7DsrqObHpYF4Qmw7r1d8TO11vpLLITltAx02RVQ8k/n2R
jYffgcjGZcvNscjGJQ9PRrGK4jPafpXYSYoXI7ubkvz/KLJ0mSsIm2JJ8KImq9PD
FP9gk60tWo+f4vFqnJQZtepFfpYW+O0nP/BPKfIjDmuiC+L8iabi7SwhCMOobd7p
TyMC73G7HhUBmuMt7eKGBah3nWku3vUYgjD7tLmjyQ4pCH+i1e6epIjm1lh9bjPU
uGBh2sSd9Eg6bHvHTtXt74jVGlXnfFE6CCFU5elOG0Zps2elzQv25wP7nlXFp1yG
8DSfWG9p5l2jr0CFslEifzUoqZymksb61QolldNUUn+/WqGkcppK6u9XDUqIN1f4
nTZNJbX51QolldNUUtmvU76k/z4rSeqNndwzbwSunoHugSEU5KvdMz/YN2zOgent
HhgYVBsHblT9/ZuQ2nSc/pzx2oxqvosw0t3Tb9TwOVegb8BsOi27Zn6gbyDHS/py
vf08h/uGzNPsihow+6FOnfc5SBZdyBGop+iy3mzT8niV7tY2MK+su75h7b6lsPzG
YcSd8hb9e1yLD5NBnGkdh4MR3q+7zw+7dY2P6+fjOo1f0+YzhdUikc/puL8pqO+2
RLa798BOnrwYwgcJZ0eXAnFlg9i+gPRZpyBNwrEWwZPfzO1BL+HoVBA3KJO3OHdE
jXGx6SGiMLVEXMJNi30XfcxDLjxiyfvFvhOx5MPOjljycWdHLHlc7PsRS37N2elf
P+Ps5ONzYt+LKPKbLi6tzosiGEAZhKIImg2VRBFOE8IURJHbzBOnDBZeFBG3a8Ps
BnZb2owYU3LK0EvynaZi0SIrzQyNgpLGihbxfXR2t4g5wUF3YNraP2J70gUCJHdU
RACL76gOyVK3QHaYtIo/Dehp06FQRHY8HzN5njBwmLzviGDydB6204uZOQtUoJSZ
o5pWiZmTFqbAzHvNMxzev9xRysyVNvvFjiUZq54W9hh/tYSBZyWYoVFQUn8GHjPp
3Wb40JMbMsOHweHuIXcfwQIBlppJH5SlbmUw6Xaz1/lpc4QZ7TuJQXsp3O9tBp4p
oxcASpkys26VmDJpYbIbmivCr9GL2DV6JkDn5MnshuYM5xBKamPEnebIAyYbEi67
t7M/6lZlp446Yb1nFTyZERMdLJ4Rj8tSt7IO/W99wu3NtHGYME8/reMZL9MyoJTx
siEjY7w1g8/bFq1dMaKoT8poxngznEMoqZXxeiHW6yysKL75PpZyKwRIZq71k3KX
nrlyKPGaBObKdINfevf0Jmnwe138FZptbpWz08XfnXCHaKaSvyAohnQq+ZdH1qCz
y5Ge6P1in3LPzCwPc48svUo+jdODNK1KPq5oR3v4pk5bA0utkr9NbLrlivO4ovOd
7MsHv6OiL9/+zoq+sK5dFX2Zb729oi9y5B0VfakdFgFLfa1M6msAX8syrUw66n7j
4WVSH9ZrORVk0n9RcMbhEfPrZEFR/X6xiup8BCeaO8oU2y/jFdHFJswvEyZqL9g3
NqmC/cvaXhqXAffzbXbATZgnm+O4uZY47vPa/pK8LyqWB6FYmZRipO2nlVT2qwYl
lnKPtGkqqc2vGpQ0lpZO2a+93hqdm0u/43M29LC0sAUxvBE7PtWhKeIG6tbScO5a
7Hg/Y3m4apdyN4aCU8uolFcumEdz1XdxuMQ8FodLX8pLRUEsZW+VWMqm1MHipexh
sfzJXsJXejX51fIR3QH/pruK+z8Jh0derfO7Ufq1eVo+JlZK9kCChh6e14qlj9EB
adJA6dSYfqGjYRb7arHdykfEdvTkE20N7MT5T2K5KN3wX7rwRiqPbBjyiVIudsrL
T4HQtQJoCbsbcsvvcAqEcgULdDc2m1aTwShJ1nh1uFEQDeyjJcqlxB3Sz9PuCg66
s7mW+GDfjtbYfqKVBbisuymGksbS0ilvE3udgLmfuo8/aPCX30/dNdLdm8uhpdbV
k+vu7Te23p7uPnOnT3z5dM9It72ts6e3u8+cj6sDjbjFpwa+LJn58HJQT+ZT6Trr
VdLvVOJu0887dON8vTZvMQtTpcwHpgI9PDG8hbikSXWhc8RCFX7K+cF8Njs7+URj
ADvMhwUs7BjkXtx4H9I8dvKJqlvpwhdMDkBLyHzYDVAD8zlb8On/qrFZ2fgwNrGb
SlksuiOy2vJ5bc5EJxKZj3Ia7DCZ+YDh7GmL7afbKjGfRkNJYxt8NShpLC2dpk6P
ScWbiXVjzpl7iXu7B4dzbMfo6s11D/S5W4n7R3Sb79SOfdxRY24U1nxgMMf9NcGF
wiPdOcMjenu7B4zCbX9fd++IZUjnmIBkJgVBoJ5MqhRITOtkk6zXrAJ9Ve6dWSVv
1Y14Qpsjhkkh5XgGZONYBsQTfVcYEGtaXg8XpkNaMJU3SMyA3urcYEATzk4emNrC
TuF4BrRDLMh3yICQxBrEgD5qbCcMs4DvzlW5VtjHA15ymm6KJac9ThLyW3G8/XgL
t0JmDKgYShpLS6e8Sf+9V1LfaHs2UsqppUw8mXHwMrCUjKP42ltwvZZMBnRDZwPA
ncKth6WMA6YA4+AJ08CgqcmTNJR7wgzonpF0YByo2/CEcXiFffJAv28lq1hyYd4Q
kO+QcbBvr0GMI1xhTVIYx67EXkvr4wHijgkSjT32wkgowX0o082xXVoyyaUcShpL
S6fZBkslLnAzasklqP3dQ8PmOpF+LS+YO0P6tDThbiCpe5LJTMJ/ekvJJIqvTAVX
ylrd8a3UEvpKGU2ULmjkMAmvMI3pdE/ywKom4WESV0q82Zju1EsXyP9euhh1duCZ
BMsHgHyHTAK/BjGJULowcyhVrjR10QyIi6C1391hR3bVinhOZ97ZDeNpZ3dKxiSK
oaSxtMRMIvmCzZ6hXnODJlMgPWb/X7C7MLhB09zWZu9wi5lE3ZI8d0yi+BJOoGkX
PS7SA4lW2S7ssChlEqEk4edA2Jzo50A2im0Ndlhh/fFj/sIzF4Yp2MkD8x2EAZ5J
3O5+k++QSbBTowFMIgSJWW3p04Vhx+mSSzLj0DGTOOGkDbK7vzlmEtISM4kT5oKh
5cAkqkFJ5QampDa/alDSaCbBARo3aJN4tWNwi2MRG6ghUnJDJxGwlA0dxFc9gvW6
0V2uG6HSZoNp6MwR4EfDtOHjnt8bhgU8adx85b5xo+zlG7dyduje4MIA37h9cyGv
YeOGKTS4cZ8t+CztO20jvl6qX7O4/Bt3o6Gk0Y37WrEh/K2CvWZtore7f8isVgx2
56zMfip1yORmTEyw1M24FMUXC8Y7Ir3gTVOkifL0QrrfcANNCPXYie2bqJc9yEfY
RBlenwdNNNx1SD87X+USwKyJlkJJo5sopY4SmN217DYsB39PLRgiuUkSAzS6SRZf
hFfeJH2v6cfYNElowc6TbxM7satpDrcLI3mR+45Mj03O6JFI3ii7MDlR7YqMm/eO
HTh6aGwmO8s7NSiGdIrDj0XWfFnKlVUzs3zMPWL5BfZS0L0xjKXBJSkO90bF3KTU
DRvmroKL/W0Vh3HdFSTguRBtDSy14vDdYtMtV7P19OLLt8yb6Pa3ieWhePhu34fl
hBxMods/YJ44YSG6ZqQl82h2uk9Fo0ZaNsPoZjukxn1P02jZvNsjwjnaVg2BbI22
2In6D2vzySZ7dvb6iPMHbzTqtP9FODtyTeH867nVe8rS/BP93Nh2xsQ9rs2lK+YL
9hedfbP+c0/LcOH86/ZV9vxr7LL6x2Vp/oV+/ni1DXNYmzNrYpo7Lo9plgtjmt+6
4sbwSzHpsN+go8MeCvgFbT7Z8Z2Cfa7zO3pkcUtzsdhCiSsTO8bZDbljpO26lVT2
qwYlNpceadNU0li/alCS5cGjHn7VoKT+dHbK6zVP292UdJrxdnNqrdrGRrV3zXab
+R3rtBWnEnnLHvEbH99rTtotP8DXHEBcdK5xxaN7r7dBX3dkoktNzaj8sakulIjN
XLNJdItcaYPkb1TjD3Jg8B1Tx9SBybepyVnFkcc+3Qd00MtsULO4bfSpXU4uTnTf
5t1ZB7dJKH9WsDt7eZvqUls3qafUvTt3aw5pQo8MbNApHHlwctzEmDySn5jRpNpj
g4PjmdXGifyY/2FOFd5lhdb8lNPantBZnJkc06nM+ti72KnNdu0Hx5eksM1pxoWD
q8051Tru2GFUyWcn3zNxY1xor6zsuQ3PU9lnleiefVaL+qziAS6iAiJbJPYzA4sf
4L5brARhB5/8XSNX6PdtcGn0yDrZIWvlXrlE3i43yONyjTzrhsS/p0P+mRYvf6LN
uqhbtkZXyv6IBWKRh/XzU9E6eSpaK/PRJfJHkZ3ubmrqlHVNr9bDqFfrAfLGqHiz
LjRAGU8/sGKNifzDwplW9gPmHrGqcPjtELsojeCKJo6f23q72Gl2xGqOf7xG7KD7
WYnnrX5P7DuYG/szsfSQ1k+cHTlrXWRXiTu12RrZRXCrZmLtrIk97OxMQn0qsrSh
rvdUFJ+MPR/ZJ+n+UWRpQxuH07BJm+n0dU22RpDtGGxip8n4OTrEeEC9h8L6VtJx
v89SWGfMKsXDFuOOAC1O+EZY399mhXXGPaV75UIQhuLKtdhFdbPmtdLOv5l0Vtl0
eOGJVquyRxZGm4sHDCEIo7Q5sUJMeOyq3dr3abOnxQrN2F90dmiYX1W8USIEYRDQ
96+2ArpRG1wT03z6lfGc4YnLik/PDkEYs953ebDe96oTd5zfwno1KKmcppLG+tUK
JZXTVNJYv1qhpHKaSurvVyuUVE5TSWW/Tvmu/vvfZIG7f1+l+9zCbrhmv9XQiVpm
xxzrN+hj9JjNK5s3M3nslD/3FsQhlD/zt/Z354b7kYNu7elHeuvtGeyxB0EP9fIc
6cl1D2hppbe3t3uE3r2/r7fbqKD3cAy1OXV6oN8qi/bqVw7cqIb0f0SLXHff0IjR
LA3PmzYrxebPqVqyuzJqXnV+ZjdZuCH7oJ7CjXJ/10mffp/frQi2a+FgtxYo7tXu
b9FCwEEnCIH36M70EW0+or/DX9HmswXVV25XXatFh1XydR33lBFILP6ztMppbZ6W
H4sVDDyU2DzxRDigX0BRxgs3fscjv+l5eRed+W6xAg9+CDf448cmIoQWepuDYnsp
fr/HxUPoYPoMO/3PR8QKGZhfcU/ifFZsegguT7t4CC4IRrgjsHDgATQguJxydoSV
/yx2gZG+7bSzU2fVVi9W1rh6sXM2P3l4LD85dUTtOTSVz1YvFgTFUH31gvql8H7N
mdLZ8swsL7OY1Yu0x57Abzz4NuzqBa7hWz0ndIsQS7568Vqx6Y7O2t+EiI89eV1F
Xz54eplSXzuY8nnFl7zCYxmJEMI0lSgeTIXlAgqDqZj5L3ThN0mQdFhAi+/mPION
L/zmPX68SMGB0izSxeBGHCouzCJumOILv+2aDu6EJW1N5c6Cff+lsT3XHNvPdARh
rojtx9tj+9z/sSO2t+58yazFkD/KEeNzVlpSjfx9yum5+BIpUgkqrVqCYS9NEFDc
1aRqX7W+Cvm6AWmFVbjDuVWvQnyq3XGeUK3zt8VV8/zrgmodie0ncrF99PrYPr0+
qO652K7uWrbVioSDRJYgVFeuYCJgL00anG0F8w5AWmEF73RuSRVMOBsWIa5Auuqy
R4QUVfRqU9Gc5BmZOKTDToeV77/62Ndb3zvqfxvkP2Z+Q9dt+4au/thvPj76khHY
worzEldp7qv9PmXmxxAbC9Re0HWBpdYW+OpqBU7ExRd4Zbl0lS7Ka/Rzz04jcWqh
ND8zdnhixoqiVgjdN46E6kTPMjSNZqJngLiMRquInk84E4o597nnG0rcM3PujG+W
2EtRSfSkyvfqv5/RNR2ql38/WiFbmtoLzdmbMG0kDyt64rrXuXqtVkDqmIVET2BE
PonjYH4iSopZiueNAPbw9y98LQjleZ7nvMmhfD4J4e3loTygIywZ2EcVkXg6FIlp
HaQ1itKIQywSM1VgfN9Z6mtrxflOl/pCN+0v2ZecvLGiLzlh63Wpr+3lfO3iS26o
swlnN8whioXt0q+sBmHbF1ppcYe/PXhtmv4jSdjmPb4jp0pAUhZxCzvy8iyStu4O
E3LJ233XCyrn0n/CSblM30va3PhN7bXlBupsR69lEX5YWWRRuUMAr1fuPEupLXdu
GGBmqBaVJS941yNLtFtQW5YoXCeZ2WyFImSbESFrz6Y/460e2YQBgdqyGdRc16Ky
VM+ag2uC2rJUUnM0uOVWc+Vy9xq1X+yMMql4+ngL3BhOChW4wYe8nVbr7Xzu3s43
4e0Uprd76X61LiaWziuftr2w3H+zDZupz6cFxVB9AhpD4b0msuY3xH6AGD8KyMzy
MY2YgEbm90CitKMAzA8CHz8/SlsDC40CoI5wtU5Av1lsuuVnWOPKYlyyLx/8z1T0
5dt/a0VfWOXPJvjaPsOXE76EZCGQWSNYp2lmUSxP+7BoOmEK8vQR88QJi50LPG40
YB7BJieLtGe8ivpoZDVs0OZR7s777QRo2WPcOdztYJM9MbAnQoX/FqNKT9F2rJwu
S/MJLK1WNR4anm21NJDm8TVxmifbbJpb9J/PNu+4q5CI2HSg+XS71Vj6oTZfarm0
sBVgz/o4nY7VcTrfbC1PZ0w/5y6zWkGsfX6zraWwFWD+Qqvmz4TZ9JXlR4VM6mdH
x5wJ821t7mi3J4x/UZuTnWfufEnuby4et1D6ysSOkVZDohqUWIo80qappLF+1aBk
+eShGpRkdHqcS1o65f4mtgAl6WEbvdzZifxsrJx7URRZoc5r+hptXXOWQ6wUvDL4
UQjYiWOgEGzPhVJjh6eOvM1rNgdqwTcQvKC2jHbMtpmpY0e6dk3NzD6EirVR/TZ6
xkWXlF2YjpCtMxPq3h2zajaFhnKXfvfYTP7QRD5/vTsm3WhBB46z+bH85Gx+8gG1
8YGpmZmJB/JoV1+9JLTY8s9TW1b9eu/MxFj+sAnpNcWtSvTsJnm1KcaJ2cnxo2OH
1MZjk/mDk4G3UfDeO5UfO8SxO7a+HWnmHPb4dPm8f8ksWXTRVXEYkzftnyfBTSi+
n8q+rhQ1mn1dtX1d8RgccQ1BLxL7tQE7ki5HekWB94mVNdD7usiM6xHYO2VEv3NU
i7q7Zb0ckJvkUaMDJnJCLpFndMjntN8L2u97RuleyyzROrkpuk7uiy6QA9F6ORZZ
9yejtfJMdJW8GF0pP4qMFrQ0NXXIRU3XymDTFfK0OXU/vIOWpUvyxBN6kIoYQnSK
FWk5PIryYBgwKnb+j5kC1gbRV8PvgDYcyoOA/6jEp9OdkPg+rmck3lTwnMTK/y+I
TQe9ue+J3VRgpLLILvBCx03afp2Lf19k4+GHDj1x0fE7Ftm45OHJKFb4f0bbrxI7
y/FiZDcIkP8fRZYu1jRR/veS4EVN9gYEtBYHm2xt0Xr8NBGDEECZUT5e5Kc8qGXK
4CxF/i/bUEZETTpbNwRhGLVNuyMyzZpxc87YlTYnm61CvlHyb7fDApTqT7RUV8In
CyearMhP+P1tsRK+XBgc6HFhdSV8aJtfYWkzyvztNh2K6XSnVc6HtrmLkg/v2r/O
voui7lhldymTx+dX2TziPre6eJdyCP+uuUvjw77UKzlspFEifzUoqZymksb61Qol
ldNUUn+/WqGkcppK6u9XDUqIN1f4nTZNJbX51QolldNUUtmvU74hdphebQoXrfmt
9pS2voHuXnMsfHBEoz/j1WnJ57qHR/rMMY657pHhoT5zT3Bvj5GYct39/cMjpWrt
PeaAaKt3399vom5Gyd0leK+99H0kNzg4OJBj22dv71Bfb/8IL+/t6esbGR4Zwdkc
Htc7ROhTP60ZSxZ0yCiop6Cj9L94JvJ63QnmNId+je4ot2v3u4ygYLFXc+sH9e9p
LWC8K1gueZ+O80Ht/nEthHzCpfUr2v/Tmp7P6bSeDej69zrMc8LRPy1RfMMyUGLz
xJM0+HzprViMQrjJie05eC/nZtORE46JK578ZpYKegnHMogXaOg9cUcwmRabBgLN
u5wdIYYS4V3E+aALjxDzcbHvR4j5hNh3IcSwQYC4CDGfFvsehJjPiX0/veizzp3+
7N+LTQfBBQGLuLRRL7gwPwooA/LuBRe0UysJLuyMxBQEl9vME6cMFl5wEXfSGcU6
7w4ppKr3l5yD/pJ8p6lYEMlKM0OjoKSxgkh8W7U9P27A9EDmSNbeQdvBLhAguaMi
Alh8R3VIlroFciJdq/gz4eMz6ezoP2byPGHgMHnfEcHk6Tx8Z+iZOctZoJSZo6de
iZmTFqbAzHvNM5wMeLmjlJkz8tzvLrVgNNsRcXPNV0sYeFaCGRoFJfVn4J2FXQG7
zUiib1iPGfpyjB56csO9A2b/cLx1oEqgZGZNJLB4Zn1Qlrq1waxX6xLhJp8bxbbz
JEYNw4VRw5z9CMYz57e636XMmbKpxJxJC1NgzteZJ04ZLPzKvohd2UeLYE6e1Az5
ZAlDzkotQ6OgpDaG3GluD9ygTdFy4BqOz3ITQupWZaeTOmG/ZxU8mRETHSyeEY/L
UreyDv1vvWbCSiy9ngnTxmHCPP30jme8KGqBUsaLzlPGeGsGn/cWY4vXYE7KaMZ4
M5xDKKmV8foZB6/poEXYPX66vj2ckqgQIJm51m9KYumZK1fUrUlgrjBMv2Dv6U3a
OOBV+tcI93ovUqV/99FD+UnOXrSnRU7OTh3JFPsXBMWQTrH/8sgaKuqINmgPY59y
z8wsD3OPLL1i/76Ci03TKvbj6pf+gG/6tDWw1Ir9+8WmW65+j+tYRV8++AMVffn2
H6joCyuD0Sb7Mg/L5q9kXyYAkCuTfamdtyX4WhnV1wC+0EBZkxYzuqYBR7GM6sN6
XamEC35weMT8OllQd79frLo7H0HpIaH0mJfxiuhiEyavzWizVfv/XW3+zrljP950
cZlaPgPwO9rsAJy4X26L4843x3H3tlx8V/IFP8qkFCNtv62ksl81KLGUe6RNU0lt
ftWgpLG0dJoF25u1iZUeHxw7PHlocmIW1djYNe57Z9W0djKhHkJhcuuh6YNjKB98
5Pvj33rH9bPqcHl/7bRMr4oixdkn6l2z3cptPL7A7IA0zvYsudjP7XG9yO+RLATq
Kg3UFQfay0F14xOcnzhrdT6X+IWnsjJc9AtjiRmWBjPki6VMweIl5mGxvAVJ9hVy
beF4ye2yQQ5qifZh/XzCTX88p7nRH2u3M/r3+miDloI/Jlbi9fDbbXleK5Y+fzQk
jQuNENKik2BG2s8Jw+txJ59PODtx0MaAA9KF/rELz/vOuDDkk9tIsFNwfjpjv1hA
C+/1XQWbcaEpnM5I2VXYbMZnJJ9wdmXs5TezIx2oyJ4PzQKYNFl1TtO1OBVUc850
c7F6KXGH9PP5ZhteaTPdEp8bfSawT7dKhesa8TXZcEjL9pRU9qsGJY1lz9WgpLG0
dBpZic+ohyX4Pv6gw4/imrlQgNsDujmwtmt4YLh7mOWerp6cvaCxq29wsHsQJxPU
HHnbMzhkIvcODQ3x7OnvyfE81agXJTMd31DqyXS4CLJVN28aJJo+F+qSXiWbdSPs
c4tDt+rn7dr/ddq8SZtypgMzgR6eGN5CXNKkmtAfQqUMP+X8YDqbxTIZ8slZtrjz
+1Znx9wuNh3eh4aAZxxvcnbgmc6Y+w0tvNczHdTdamA6Zws++V81NivPHsYmdjsp
9jvcYfjYT2t7IaLYuDCdM+7Qe6XN8daY0XS0xfbjbZWYTqOhpLENvRqUNJaWTjmq
/75Tm5GB7lxug9p+J4KU2WmF9NDV09/Xw0HXXb3Dg919bMTo6hns7zVO/SND3QPG
aaRvpDuHW29uoHsEJ8MdeuEOvQN9/eYw7eH+QcMdHJc4de5encyYIAXUkzGVAulo
nWzS5hajewo7WCVv1o16TJtJw5iQaDzTsXEs0+FJHJgOa1HYyQNMAztMB+bimQ4b
ZTzTGXN28sAIEjvF4pnOAbEg3yHT4fyJBjGdjxrbCcMgzAaVJrt5xmykcVfkwYNH
W4o3wHgpaa4plpL2O6kHKUlaYinpeAvqQxnTKYaSxtLSafo9hOhtE4emjqn8wZmJ
2YNTh8a3SEdBp949rP79WYglp5Yy8WTG4c8IW0rGcbH+t0Iu1+Zqp4u4UUsjg7qh
j+oGeKegLlPKOFBoh3HwhGbisbKCHXO1c4NxbBQr3cA4Bt0TxjHq/MkDfX2pqg2i
JCDfIePgLKIGMY4txmZXRkOFbxiHckzE7KJrLmccY4IUYw+5gFk874ZU2Pc3x/Yz
zcvlRnsljW2s1aCksbR0mil6KvFet+fYbO6hEbPDp9lv2rl3ZyxJrGYzTq7b7N4p
t5yqe4rJLMJ/eEvJIlhTRMV5hVzqWMQVsla6dDMb1GaLNuUsgiYOi+BJHEynxCzC
T7bDAsxGXLEsoMu5EQ924VkEbRE78Cxi3P0m3yGLgE83iEWEsgVywGhk5QPspwP7
XFP5LAo6LqNt8d4SWRHM3gT20XZuu8pYRDGUNJaWTnPCHePtreNvPzqbNxc8vtEo
EXSYaY5cr9v5l8vl+qytd8Tt+DO7HvqZD4n/nKp3gskMgheApWQQyBCrdDNepXt7
24/rUZIO3yq3arNNuLGnlEGEMoSf8YARYCcPyA1+xqPX+fMbKjxjYSYEO3nY5uzA
M4gJ95t8hwwCqb4BDCIEiVn95njwcTqwz0fJu+ZPNMUMYn9zzBSkJWAWLcuFQVSD
ksqNS0ltftWgpNEMAkbPpN3Wrm108Nu7dvDYabcPH+ktbIKK/5yqIU5yMycNsJTN
HKww/y4070dNs00L/q26XFplg2nmbzVh4qaInabr+30MwwGeNG2+cd+0GUL4pq2c
Hbo3ODvwTZtmDMhr2LSZm2hw0z5b8FHad9omfL2wgSAeEpwO7NPRchkeLCcoaXTT
vlZsiLxZ2OgeHulBJO/vHu4fxtLTPThoXE6lDpncjIkJlroZl4JVjpW6Ya6US4w4
T2wKwIvcND+aKE8vntOMvXjOwid2Yvsm+jYXl3yETZTt6udBEw13C5rzcQL7XLD1
e9Rs/c6aaDGUNLqJUuqMKu1uY7fROPh7asEQyU2SGKDRTZL9am069Tb9lYWbi32T
9L2mH13TJKEFO0++TezErqbpe4FOEWH7TXtvvvt1aPUWKfTOcCmkyk8eRqHl6Mzs
hGT386TB2d3PwxJsqdJoZpaP8XwBeynoxmg/NKzS+3mU/ps3NV3ZjQ8FwwDZg1Ss
Ai+ufB0efpqclDALKfAC2iXzaz4OpooC7zQ8wfuypke6ow8VAjtfXN/ufd9d6ss7
3uF9j5X6kvtD3rcsLhzqcEVfRBCU3ZN94Xiov1vf0YKvFUl8GeNLXuHGTBJgN000
ikWSsD5ADbfkkITvRjyqdSPVhrZxN+IDxbfk8B4vdVFhICmLuBGHDyY5i3Qie2Ym
uiYPHz56ZMJl1pK70NUWpZn1L0nKLH5pMuszxXcGassUeeD2495F5Yfvrl75oWWA
xeWnL+FjPDf5oS2DxeWnf9nUD9wHLC4/A8smP/BLsLj8DC6b/MDhweLyM7QM8lNZ
LmcwzoT4np1d2x8aQiq3O+y2Db/hhk37jkypO+/p3S6VpHFLa6nzyxXVt9NRW6E0
Xir9ZWZ5Gd8isZeClr8Ri5PGfcVT5Z/Rf/9W13SSm4dv0dMFFxvOSuO4Io37UHw5
PgRmqaXxd4pNN/lWShyNL8EcLL/0ucGXVJm6qyT3hjkHNci9JBGySmAZXjkWI/fy
Ht8l+DwnZRG3sEsozyJ5edPehEzy8uT+oDSTPoNJmUzfH9jM+OqtLTNQt9jLIUtz
Rw+7+NyV93ZrVE7sHBt5tL7xHBblABW4UcHe7vvItTq3W/XzviPTY5MzE+Mqb7Za
2e3pVbrNm/eOHTh6aGwmu24uNSiG6t0ohsLbFlnDnUylrDszy8fcI+m70RDXS/pd
6bMFF/vbdqO4/m3gw5cDaGtgoW4U6ghX6650tjeTbvkebk8vvgj4vOFBscJ/aUfp
w3IsM6bQUXJ5hXXCQnTNA0vUv6x2vYpGC2rp804VHfc9TcX3ILCS8ohw1ZvdI0O2
RlusdumHtflkk92rzV7DJ6MbzV7t/yJcb7KmcEXb3Oo9ZWn+iX5ubDtj4h7X5tIV
8wX7i86+Wf+5p2W4sP+7fZW9og27rP5xWZp/oZ8/Xm3DMI4+syamuePymGa5MKb5
rStuvKuQiNh04P0dHfYqvC9o88mO7xTsc53fufMluaW5WAihxJWJHaNavxRCSeV4
SmrzqwYlNpceadNU0li/alCS5cGjHn7VoKT+dHbK6zVP292UdOHWdnOxktrGqUjv
mu02uknWaStOJQKXvYUqvmHKXAZVfseUuSOr6OqtirdLXW+Dvu7IRJeamlH5Y1Nd
bGo3SpIm0S1ypQ2Sv1GNP8idVndMHVMHJt+mJmcVt3L5dB/QQS+zQc2GDLOd3+Xk
4kT3bd6dvRs2CeWvs3LXg21TXWrrJvWUunfnbs0hTeiRgQ06hSMPTo6bGJNH8hMz
mlR7s1Vwg5jaOJEf8z/MxVe7rNSan3KHBkzoLM5MjulUZn3sXRwLyNmAD44vSWGb
C7cKd6uZq9R03LHDnGQwO/meiRvjQntlZc9teJ7KPqtE9+yzWtRnFY9NEbwQ2SKx
nxnwo+9SeNGyEuLpBZYSkSDcnh79d41cod+3waXRI+tkhxYI75VL5O1ygzwu18iz
Zlws8ns65J9p8fIn2qyLumVrdKXs1wY8rJ+fitbJU9FamY8ukT+KbjDuTU2dsq7p
1XoY9Wp5WjZGxSfDQQOU8fQDK2aDyT8sfINzZ6TcI/GezR1ihVZEZLaPecWst2vD
exGrH9fmGrEaI8+KHdtjfk/sOxiJ/5lYekjrJ86OnLUushsaOrXZGtlL1+zeKGtH
nfthZ0eD6lORpY09pk9FNj1omo/sk3T/KLK0cVg/F7aRNrqg65psjSDbMdjETpPx
sySI8YB6D4X1t5GO2DI4S2HdnpXVUiKMuiPim/bEwnprvP3rRFv1i9OIe9LtGzXh
22Plsf0rrZ0XdrTafaYoH/246UNFgnUIwigsK+JN73PObgYbLccLwvfxFit8Q8Oe
VdUvikNAP7PKCuiEP706plleGSjCvbJ6fvms5i6L1dPV5ainn8/CejUoqZymksb6
1QolldNU0li/WqGkcppK6u9XK5RUTlNJZb9O+VP997/KQguCr9adrp37tbO+Tsp6
0140HHPdfbles+E4vIRsb0EKYp9y/tae7p7hXsSfW/vpsvuGeofNYQcDfeawg66e
kd7unBZSegZ7u/uR6roG+3u7R8xZCQPD9qyEXLe2mr1Kvd1DPYM3Kp1gLzJFrnug
b9gcohCSYM6KMX9OnX0+V0bNq867fCaLM+Qb1FOcucr9vUBz9RUyECwCvEaLAzv1
77u1eb3u9veZrtdiWnef79ZmTvP8x3QX/pnCYpfIv9Zd7e/o31/W8b4WpPcfdTf8
x8I2kB+LFQU8oAHKeCJq0BPQx3hxhutYSIffXNHGu+i+dzp3RJi7nR0/+irEFPoX
+kvo5jfLFsRDFKAEsNPjzIntuwj3mFiRhN+fEZseosq/dvEQVX7HuSOifFnsexFV
vubsiCf/UazYQW/G4V9eISBpmcMvWHTUumCxczY/eRhd3CNqz6GpfLZgsSAohuoL
FlQwhfdrzoST45lZfqYRCxbc6+jBt2EXLHAN3+pZoVt3WPIFCxRoSXfUDWMIEa/7
w+iSffngUdwt9bXjJ59XfGFeMEoGEIQwTSWKx09huYAatAJIgqTDAlp8P+c5bKwV
wHv8ENFrHpdm0as1E8cvpPsskgNMoBWwueBBQBKW6amdBfvxfxTb5fDOl2RUitfW
PYsuzWq136cMYRSvlWkqFyRhsJemBkijmthaqnnAtwRKC4z5g4ULzMxAJGoeJJTg
8dcGJXgotp/+mbqVYKdYcaNIUqxckPVRcrAF6fXlSwvSK8VXL0i+f3fgapfS9T9u
OytTmq0RBcrhGFFRgX790j/82OOXfGC+UJAGB81v5KtP9Tzxyhtumh6tV+EyD4Lc
ZOm8oOsCTact4aLtjaWFTJTFF3JlEatTF1+Xfm6fOjxtZnaPTHWbmwpuUGMP5idm
1PTEdH5yfEIhUR09ZGQqJ06VoSkTp0KkE6eecKa0+87M8jK+gWIvRak4BQcDNN7v
Ruvl5qZXJLr5hu3Ne1wYQDdlxSlcUaMkBYwXnfigMAuJU8CIMRLHwfxElBQzF981
AvL09y98LQjl+R4sxNuJURzKfebGJ7QXh/KlAbwd9+JQ5Kw0FDnFuYowOB0Kg9yO
R1q4esTC4Psq+kL7/1bRl/z/XEVfSghlmWRfcjKX4Gt7Qv8N4EtuOqWy8mn4vYAa
xEySCPsbYHuNcvDaNP1NkpjJe3xnT5WApCziFnb25Vm0Mp7qGU/IJ+/33TSonE+m
SLAn5TN9v2rzw0cEassPPk540XkKRZdmI7rUnkembeqVR5oCqC2Prs56l0+d0XhB
bfkJ6qx3+daZ09erMY+uzvqWT53NOffa8hPUWd9yrLNyGX2N2i92IpWcevp4C5wY
LgoVuMGBvJ2W6u185d7O1+Dtc4HdjwQukoXuMEs7RrjZxsi0xdOCYqg+WsBQeK+J
rPmfEss8HA7t7ZlZHqYRk68/X3CxMqUdLeD6g8DHzw3S1sBCowWoI1ytk6+PiE23
/D4wXN9f0ZcP/gMVffn2P1jRF4b5Cwm+ttvw5YQvTJSVrAfFTt6ZZhbFErUPi2IP
piBRHzFPnLAQXfNuo/BBho/LyTLNbjSyRyOrkW3OQF5hlWC2E6DFKsfAww82PWns
PREa67cYzXGKtmPldFmaT2BptZrg0PBsq6WBNI+vidM82WbT3KL/fLZ5x12FRMSm
A82n262yyw+1+VLLpQXN9z3r43Q6VsfpfLO1PJ0x/Zy7zCrBoAz0zbaWgub7/IVW
q53JtOkrc2V5YVK5o2POhPm2Nne029vavqjNyc4zd74k9zcXj1wofWVix0irEFAN
SixFHmnTVNJYv2pQsnzyUA1KMjo9ziUtnXJ/EztektSOjRrq7ER+NtZFvSiKrFDn
FVuNcqo5djPWgV0Z/CgE7MQx0H+1p3erscNTR97mFXkDLdgbCF7Q0kU1ZNvM1LEj
XbumZmYfQqPYaDobtdqiC+AvTEfI1pkJde+OWTWbQiG3S797bCZ/aCKfv95dSmeU
fgPH2fxYflJLvQ+ojQ9MzcxMPJBHmfjqJaHFln+e2rLaxntnJsbyh01IrxhtNYBn
N6Hvo4txYnZy/OjYIbXx2GT+4GTgbfSZ907lxw5x0Lqtb0eauQYvvssv718ySxZd
dFUcxuRN++dJcBN63qeyrytFjWZfV21fVzwS/3mxgl4k9msDdjxdjvSL5IymkTUQ
FS9yd4Jv1BxzRL9zVIu6u2W9HJCb5FGjACVyQi6RZ3TI57TfC9rve0bHXMss0Tq5
KbpO7osukAPRejkWWfcno7XyTHSVvBhdKT+KUMrSVDd1yEVN18pg0xXytPRH/vxr
C0RW8sQTepCKGEJ0ihV+R8SWB8OAUbFLs4i6u8UuOOB3QJubxAr4j4pV3mIgcELi
mxifkViH/jmJdd1fEJsOSmPfE6tDb6SyyM5+QMdN2n6di39fZOPhh8o4cVFwOxbZ
uOThySjWb38msspuCPMvRlYfnvz/KLJ0oUCGrruXBC9qsjdSorI32OTuRNCfjZ8p
Qr4FlFko8qPUQS1TBmcp8g+bX6NGRDVV01Z8BHkIwjBqm3ZXlyACS0vO2JU2J92t
j6Szf5UdFqDfd6K1us75Pm1Usx1SGB31FVbnnCI6vdbqkJPmXMfCtJ1st7SRzujK
WHd9fp3VXTfpXJx8zPr+9TYM+epYbfOFfd7ZqYLpNcWbckN4mvc7vXejM385B8M2
SuSvBiWV01TSWL9aoaRymkrq71crlFROU0n9/apBCfHmCr/TpqmkNr9aoaRymkoq
+8U68Wknco2yx41aOLAH7I90D+X6OI37FnPLRo+9pGfzZtS/3VVeue6B3JBT8B4Z
7FUbB25U/UObEOh0nN6eHF6b0eh2EXoGugdGSJMkh809pvbeH+d/7738GBruG+jr
Ny8cGhjJ9fUMY+0Z6O8dGNTR26No0Jz430fgWCf+pzufyWIQ+Qb1FINy+l88Tzmk
u0iO6b1bd6P3ave3GDHCYly4ynKVPKxFkQ8EcT6q43xCu39Kd8dPOPff0PandDpf
0ub3A7q+oeO+KBzi3BJZ0cEjJzZPPEmDj3tI7CKTF33oV+jy0X+nmyccW/t48vst
YsUewo2LFV1491HnjtjCFCLpIe58wMUl3EfFvov+6hMuPCLOp8S+ExHnCRceEec3
nDsizlNi34mI8yVnp4/9fbHvp7f7htj3Ita86OLSgr1Yw+wpoAxCsYatfZXEmsuc
KYg13OJunTJYeLFG3Jn1VM28u26CIt4fnF+vzPn132kqFlOy0szQKChprJjSaUZf
sDB7E4C5Vqd/yFjNjTunFgqQ3FERASy+ozokS90CuVugVey9fuHtAnZuIGbyPGHg
MHnfEcHk6TywA8/M6VgAeQ+ZOR1RJWZOWpgCM+81z3Cq4OWOUmbOuHS/u5bU7EuP
uHv4qyUMPCvBDI2Ckvoz8E4zZQYf3m0GEj0Dg0O5QTt6GOzpH3F3MqcIlMysiQQW
z6wPylK3Npj1al0i3MV8o9h2nsSovTQOc/YjGM+c0TUApcyZ7RmVmDNpYQrM+Trz
DNUmXu7w6/4idt0fHYM5eVIz5JMlDDkrtQyNgpLaGHKnbBJ7tlDRYuEazpJyE0Lq
VmVnkzphv2cVPJkREx0snhGPy1K3sg79b71mwkosvZ4J08Zhwjz99I5nvL/gfpcy
XramZoy3ZvB5bzG2eIXmpIxmjDfDOYSSWhmvn3HwehBahN3jZ+vbwymJCgGSmWv9
piSWnrmu1v/WJDBXpFq/nO/pTdpc4NX+1y1e7f/m3UcP5Sc5h9CenDg5O3UkU/tf
GBRDOrX/yyNrqKgjYk/6xz7lnplZHuYeWXq1/w8VXGyaVu0fV3sco4Vv+rQ1sNRq
/x8Wm265cj6uH6noywfPslqyL9/+xyr6wsr+cUVfuyWiki+y5ccr+lI7xxN8rYzq
awBf0mEJEBn158XmBw8vo/qwXpMq4apmHB4xv04WlOHvF6sMz0dwormjTHn+Ml4R
XWzC/DJhIlWwjzbF9tPaHkQ1cc0AfIUdgBNmvjkOv78ltkuruiv5qmZlUoqRtt9W
UtmvGpRYyj3SpqmkNr9qUNJYWjrlkPY6qE2sEvng2OHJQ5MTsyjOxq5B56u75hkb
6iHUKbcemj44hvLBR74//q13XD+rDid02FYH9aooUspsr1bvmu1W8cbkpoiDSvT/
wp5JE663KFxvxXB9ReH6ksLt5Wi38QnOHJy1iqLnho5Ty6jEtxrKVi6Y04RwiTkt
Dpe+xBPSryMdsTQOu4TR6sI3NQAWL40Pi+VbSMmvkGvlZqPFwXanDXJQd8rHtXnW
ds5yWnO6M9p+abRRRrV52nRASNMeSNrQw/NasfTdLFYzhIa7Xew0DR0Qs92kSzdB
h4KdfD7r7MQ5LZa70j2fce5mbjqydvI56uyUmp8qocsF0BJ2Qw9J+VRJym7IZjM+
jPiEsytjl7JuCMlDRfYgZhbXpMkqkhplVmenCxtN6MKG9PN5d9AzYaZbrEIqdmmN
7ce1PeuGSqGksbR0mk/rgKC/7Q9lZfcAOnHm5H6O6e/mpNiu3qHuEXOUa1d/z0j3
sLH15HpzfLwmqNF+GxrQwXAaGhrqHsAyMtjXbdTuTjXwXcmsh3eDerKeVvNvlWmW
zGteqMt7lWzWpt+xo1u1/XZt36PNm7UpZz2wFOjhieEtsA3SpLKYLUVpDT/l/GAN
m52dfPaLZTuYW5075nbnxvsoE+zk883ODjzrQZ4H0BKyHk5GqIH1nC348H/V2KzE
fBib2O2s2O9wFz9hP63thYhi48J6zrTErAcWg11h2uJz4k9oezLraTSUNLa5V4OS
xtLSaVZdmfIYGejO5Tao7XcifJmdXshjXX0jQ91DnDPd19+jecBa7TQy0t/dh1PP
QH/3oHHqGRjpx6Wrv3+guxcnwyAM9xgaHtARNTvo6RkZgs30jAz38Tx1Dt+dzJqg
BdSTNZUCKWmdbNLmFtO0RV6nWQQs6YBu2m/X5mkj2Xi2Y+NYtsOTOLCFTc5OHmAb
2GElr5OY7Xj2AtuB7XrW8XZnp1w822GiAJDvkO2wjNwgtmNJOGFYBNx2rinWDR1t
jrfOSEv51hmkpemmWFra46Qf7GcCSeh4SyWJp9FQ0timXg1KGktLp7xR/32DNtsm
Dk0dU/mDMxOzB6cOjW+RDn9Avf3rVPjPQjQ5tYRpJ7MN3gWWkm1crP+1yWXaKPN+
vuYLZUA38y3a3GkkmlK2gco8bIMnTRqDLidP0lDuCYugbSDdwDZQ6+MJ22BhEzt5
oK8vlVaQogD5DtnG+6RhbCNce01SKccO2zjdVM42xnCP7CEbFMHzTfHgaL/bYYj9
THPGNsqhpLG0dJpFACrxXrfneYW/1ML+ZSORbtH37owFidW6k+sfsQOS3r7ebtOO
C5ZTdU8xmUX4D28pWQSrllaJ+hLHIq6QtdKlm9mgNlsSWQRNHBbhFaoxne5JGqx2
ehZhNgKLZQddzo14g85OHmiLpSziH7vf5DtkERym1iAWEUoWZlNuFEsHpwP7XFPx
JmHiokUz2hazFFkR7GRZEc/n7G/ncqmMRRRDSWNpiVnE1vG3H53Nm/sU32jUFDqY
6RgZGTRdeq67t6fPTGAYxQV7PU4PLb5ngL9mL6D5E7OIeqV47lgEUsQq3ZBXyUbT
jEU0mTp8m9ym2cB24cKcUhYRShF+zgNW4Oc8Njo7zb7X+fMbKrDTNm4TmwZ5YAoX
O/AsgrVEQL5DFvFz0hAWEYLErA716VhyCOzzUbkUAYs4EQxW9rvBCllXLTGLmG9Z
LiyiGpRUbl5KavOrBiWNZhEc1XGDNlu7ttG5b+/awWOn3aF8xOyr6ukv5QI1REpu
6CQClrKhgxXm34VOFlivG9bl2lylG991pqG/1YSJGyN23+97w5DA9/985b5xowLm
G/dVEjfu65wd+MaNKgAgr2HjZu2/wY37bMFnad9pG7GZWZB4NuGMxEOEuWi5DBGW
E5Q0unFvEPtJ5u3SRs/wkDkwoKd7OGfWKfq7+0bMOsWp9EGTGzJRwVI35FLYtY61
unFcaoR6YlMEXvCmAdJI/ZNGiuDuhXS0cLAT2zfS4y4u+Qgb6ZycF4003JVIDzwf
2OeC+YBRs8U8a6TFUNLoRkqp8xnaXc12Q3P499SCIZKbJDFAo5sk++LadOpt+isL
NzH7Jun7TZ6+34QW7Dz5NrETu5pG8cU6xRslOH1lg9q+o7//4GSVw1eyG4XSoLqy
MHUHx3jCmVLl1MwsL+N5A/ZS0JUxaKVxoSzs2xira5+MXiHfjS5JdOMDCc2jLgyg
7VplYVz3im39GDvMthwJs5CyMKBd0mH7OJj45h6PkDs51eKEe4cI5e2EOtf3DoU5
IA1APwz1VRSip8mJ931MbDqjfsFWvC+uv1jRF9r/f/auBc6m4o/PvXv3vvfurler
yCVva+2DRZG7IuWVhDwqu+wKeVsiyU0IISqi0IaQV/RUkQ2pJHqgkkJK+hdJDyqP
/3zPOXPP3HPPfezd3duuPd/93J05M78zM7/fzG9mzpw588PZQkLsSGUs+J/vNxYS
WuA3FvxiX68yVpxcsZaCWHCDpZQcyS/IUydPrvhWBYRhdwhJsAGRIdCAGOhBXR4Q
GZFsdwj5sPkjqgRQYxFhuAfNXp1F8FZwu0NKPjHYwq/GJ/IOhU/GDxoREB4/iCka
u0NKHjEvLyoeoQpAeDxKdVZAu0NKfoqyzqC8QHj8cHVWSLtDSh6Lss7QBQHh8SjV
WQHtDin5Kco6Ez6GEELC4Yers0LaHVLyWDR15juRl+0OsbfyAHJBT4xeFKVAGHog
5oemMj9aOfOjNTA/JMn87HGhIgn5A8QgDxKa3aECAmII/EyBH4TH7A5dIPKcpzvn
134l49eRhP5MwQOLw6F+gLjQEyLOKcVnCoT+ysWwVQzoGhDsmQKlA124HyAuImK6
vh/zIfQZv7Fo8M/6jUXbX+w3Fh3mEpVYcdhgckIspI31vwFEfJEoqJlOnlEz2iCH
kON2otkd0uwORTQuEJyk5PAQCE6ilZPhvyyLZncoFGssmmWY8CzDaHaHQqlRrXWF
17rkJ3FM1zDR0xHN7hDkgccAFxEX8rFe0ImUTbtDeAgBIDN+yj8D6RDvHQohTvkx
PSdEnJ4L+/yig9v2YV8FYAp8Jkr86sBJf3mc3SEXZ3dobgh2hxI4u0Muye6QsIsh
ltvFEJcftGx5nN2hZM7uUB5ndyjTj90hl2R3COkQm/zN5lybyBfC4+zen5rzAA2q
1VVZ3CqFfI9W1uwOiSiNPIQLJ/GfppMUfVwgOAnuc3uuQ03TScKLCxdO4j9NJ/Ef
F0++ov8PkILtCKFTJskcT+OUpMbCB7KBzPE0S20i7ItLTUpNbiwep9qYmeNpmixY
6hE/lhE/q0tJT0oV0kSS6f7M8aSmNG0qbrJLT01Gdqnpac2FANEMT7K4DeiKZk99
0gN2gaKc9DSif/KqpPg9kI20p4NmVxreS5g0iOhP21QuvX6ITjamcC9QZtJ7nqTh
S2jYcimtNdS/kYa/SdN5V3gtJGI3nbTsI2pWhjBZAU9wkQaaMvt+CBOdVkT+Fgkr
UxjUQddVcnHdi4iTHND1J+JEBTLJlcIxScGHA0gDk5spkh90M4mYF0YnvGABPSY0
WGkEDSY0y4mYFyY0a6RwTGg2SvdiQvMmEcuCEfVdKRxj224i8oFJDBbPcC/0lU1i
sFYKQAb8JAbl8jeJ0awMBQWbxBDNypCGEg8nieykRN3KkPCtSuPm4jAbhEB9oMIN
QOEHqiGkuDWwOKwM4dUWoOzMHyP+O3OkhZ9mZcgvlJ25k/4yifwUepTgQxvNypCG
/wpOUvQduNxJiwaEGqc1SRdOLEpuwo4qCEJQ3J30QFLcWoZO2kzn7PioKZGI+q3W
QaNjRQeN2T176mCdMnYUAMpOeRbx3ykjLfw0Ixd+wd7uE826kIYSAycJryMOal2o
McwFiatHoVgX8iZX74hxO1D4jjibFLeWhWNdCEsogLLjnU20jrcQQPPGqphmXUhD
yYGThNvxBjEeVADrQsUzyy3+zrWorAtVIoXe3K9ZFwoPEENom/s160Kl49eRiJ0K
/Epg5oKdOYXd3P+cJ0RMU9zcj1C8KmJgqg9dA4p7c38eEdP13YKP0Of9xqLBL/Mb
i7aPF2nqsejKVviNxfrrC35jsQCw0m8sameVSqw4R2U1gFhQouvFHPVpIvKDCDZH
ZbQBTjlBwGThaqNny7tmXYiHk4glZwg1TScJLy4QnCSyZdGsC0W6HJp1oUiXQ56N
o7tER0uFr1kX0gW2LpRHRKAs/DD0OPFdKglxGBLZlI+azCuAdSFsZSV6cXkBW0c3
cpaGcI6+fKd4b1Pie6Y+8zs560IbNetCKnCSyJYlXmjK2SQEiz/JSc0bpzfHE3fD
lJSk5sKuuIZpKUniYbayzZ+U5knNU4TNbU2TUoS9cNTTVDpUL5K5qXc/yB0oyu5H
zcKQjTSgITiDH2Dn8Helvz7CKyxl94NuBeWBix9ywb1IExWG3Ul4pYU4J5H3HzSQ
6MAndBV+dD+tJD9+UFKE4R5sloMffPaR/ADrfp6XrlEWvvtBNxdG91NQoPGLb+nE
WfNQ+FQsDGE/31Fdnmr3Q2e4nm4mj+tyko2yP9/or/uJNJwksiofCE4S2bLECzbz
xhC/Vn5SaD+QCgM+zanmNxdM+qSmJzVphqDUpKbNGgtBjZskNU0WzPykpCelpeHo
bdnMT2pyUjOhP2hC0xB6iKbNkpo2Ffuj/zR79Q4KxQGKsoNSgrczhF2tOBPNSnpT
Be5Pf0OEDgpdNet8xHvEzgcudsWi88GbL/jBAzoPpIUOBXyxzqe3FMZ25LLOZ4jk
h2hY5yP2G76dzzwSsc4H+7NIEdgZQl/cRfoECHMlIpk9gz+P+rXORwkniWxZ4oX6
6kbCtQUUeIpyoFhTV+86kBtQnF2HP1tDNuKi6t6e/ny7DnQL6DrgotvAL1RbQ+g2
8HNJYeABa19s1ZN1HVhPBMA333U8QSLWdWDKFczWkJP+Ruh8H7myqHuGszV0lLM1
NIKzNUQ0E2UqcJLIliVe+NAWlejfMpDwHZHCNFDjpOQU4TufJvSpJd3Lc6Dok1Tv
JFjTK85Ogrc2JD4UVSOxdOiz0Pm5haqy2vwCSo5Ogj3Y4BcvueABbz9Bj06iGpE/
Z8aAyuYXmP2z+YVL8gOsk1ghXYNvvpPA1z4R6iT4+YXwSa+KtSH0e2697wk62DWT
yVkbcnLWho5y1obcmrUhFThJZMsidxL+bAOlNcVYnpyU0jhNsBLEfYgoGQdKw3/e
0EiRJ/nfdRK8vSFxJSSNKntz+mtFO4I2JFx7Q0gLip8mxSOuueRHHIZppAEe2kh+
gHUSeLsIgG++k3iKRKST4IHExF3VRz0PHkc1e0MSnCS8uEBwkkh3EvjatQH9BTId
5NMNhHGTuqIjEaA4FR0oKfaGVkrX4JVX7vkk4spdUKBZinmKSiy8gdHsDRUAThJp
5a5FxCYpGRFKxWc5WBSkk3bhrUWTpNTGgq1QH3tD/knVFRm3AsWtyEoUh72hVdK9
4INX0gWkVCgp/30iRuB8zd5QAeAkkVZSSB3NULImJH7azP33sTfkQ6GukrgDiLRK
Rsre0FU0RTyqeu0kTm/uu5NYPn7FWff+Rs7m6QPrEc3wUCgIvI8YlYiuY4T0U+5b
1X4l68c6CfiVwJiGp1doGfYRo14BDCbldRVJtq6SahgaCP9bLdEAUGJxHzFCnURs
Lfix1XM0KPyC7SMGoJcYudk9+Pma7kHqzI8xv/hNCiEt5vfNkYG/A10pOpkAu6BH
gIrFvkjE+32NBiF0jd9YlH2t31jwv85vLLha7zcWnGxQiRXnT6wNIBbcYOk0R/IL
8tTJ8ye+vQBhmBRCEmzMYwg05gV6FpfHPEYkmxRCPmyKiCoB1FhEGO5Bg1ZnEbwV
3KSQkk+Mp/Cr8Ym8Q+GT8YNGBITHD2KKxqSQkseiMXUi8ghVAMLjUaqzApoUUvJT
lHUG5QXC44ers0KaFFLyWJR1hi4ICI9Hqc4KaFJIyU9R1hk6TSA8frg6K6RJISWP
RVNnvnN12aQQOGXlQy7oidGLohQIW8P5oanMj1bO/GgNzA9JMj97IsBDPIbQEL86
DPCsoJkUKiAghsBPC/hBeMykUAOdPOfpLrnar+T8OpLQnxZ4YP031K8OX/KEiHNK
8WkBob9yMWyhAroGBHtaQOlAF+5XhxuJmK7vF3wI3eQ3Fg3+Zb+xaPuv+I1Fh/mq
Sqw4bDA5IRbc4Y4BRNxQIKiZTp5RM9og54vjdqKZFNJMCkU0LhCcpOTwEAhOopWT
4b8si2ZSKBRDK5rRl/CMvmgmhUKpUa11hde65CdxTNcw0dMRzaQQ5IHHABcRF8mx
XtCJiC8cENePlB2TQngIASAzfsqPN7yoZYQVcMo/QrjK9JgUIqbgJoXOcCaF3Abx
4wIn/SVHi4ceI51Mm/hYgB1BTmNwk0KZnEmhTziTQkfj5M0JefHBTQolW+Sy5Vvk
so2wymU7WlF9i2J+JfmDiHzJjBD8Lrvsz7d7fyjBAzSoVvfV4m4olNl5jWZSSERp
5CFcOIn/NJ2k6OMCwUlwn9tzHWqaThJeXLhwEv9pOon/uHhynP4/QsLc9NFYx4zv
pKQkNQtqfKdJ08bCHriUpCaN07yN76Q0T09DFG98J7V5UpMgaUr2d5o0FczupDRP
ToPbuHFTwfUyLlRGGFWfCIFxoCgnQs3on7xS2YoOkrfQHvwOOpD2oeH9hImEiCG0
nU2k14/SCchs7qXKk/SexfSeVfSel6S0XqfxW+j1TvrbIwzKIvbTicxXRM3MUDMi
8gQXaaB5tyLiayZMfjBcYWRBvncQcaAHHU5LgItrTIRQXtANIeLkBTKZKIVj4vIo
EdPAhGe25AcdPjZCXhixFhMxDUxyVhExbUxyUBfIC5Oc16V7McnZItFgMrJT8mOU
3SP5Md7tJyIfmNh8Jd0LHWYTG6yfApABP7HJI/4nNpqZoaBgExuimRnSUOLhJJGd
qBSlmSF+oMINQOEHKnTjxauBxWFmCK+7AGVn/jzx35kjLfw0M0N+oezM8bSbyX1f
g29tNDNDGv47OEnRd+DypxCiFaEmKY1F60GN05JSpRPcglGod9O4Ayh8Nz2QFLee
oZu2CF80BTY0hDk8+MICJPwA65axzwBQdsvLiP9uGTT4afYu/IK98yeaoSENJQZO
El5XHJqhIXEBKWRDQx5y9Y4YtwOF74izSXFrWTiGhrCFC1B2vMuJ1vEWAmjeWCPT
DA1pKDlwknA73iB2hApgaKh4FiOKv3MtKkNDlQu/5V8zNBQeIIbQtvyP04m/nkR8
5fAY/WVJLtuGrf3++19HUvxb/vE6iQFpilv+Ecq3Jab60DWguLf8Y9cQ0vXdmI/Q
zX5j0eDf9BuLto+94Oqx6Mre9huLFVi8blOPxQLAVr+xqJ13VGLFOSqrAcSyF3iY
o+LrKkGBdfIcldGyXVQqx5sgYLJwtdGzEV4zNMTDScSSM4SappOEFxcIThLZsmiG
hiJdDs3QUKTLIc/G0V2io6XC1wwN6QIbGsKQC6As/DD0AvFdKglxGBLZlM+YzCsC
Q0MYwrqoDGFNqXuUMzTk5gwNxXFWP2ABRBuGlHCSyJYlntxLRPsPIZj+aUYfs4WT
7xsnpTQVDrRNTUpJSUXrlS3/pMI2B4KaCUTUk56U3FTYFncgkpmpdz7IHCjKzieQ
mSGxQ7qR+m8RHsgtgjUP384HnQrKAxc/5IKOA2miurA7CRvWEOck8v6DBhId+ISm
Ij/8bpTC8btFCsM9mOXDDz6ZBRCAdT7owACUhe98VpKwOp+CAk0fD8LBzAzBf5T6
PTcS8V50Pmckix7oZOZyHY6TMzO0UTMzpAIniWxZ4umDsGgyyo+dn6ZJqclpsODT
JCk9OU0w6pOSRr1iUGrjZkJQ06S0FIEqBft0EcSZ+UlJaip0ECmpSWnCi/C0pObp
kpWh/zJ39e4JpQGKsntSgjcyhP2thNxGu4leVH370d99QveE+Q3resR7xK4Hrj8j
Q/CjO7mNyF1PLykMXU8/yQ8e7pP8kAzrerBcAIBvvutZRSLW9WDdjQQxMgQ/MXh/
hMPmTJmckSEXZ2RIaXhR63qUcJLIliWe9CCi0b1gZoDE/wWZnhwoxrTVuw3kBRRn
t8EbGBJ3O9amM5LGVLWZEUXfbgNb5tFtwMU9+CkNDLEtO7WJbGCoMRG7DPzwehNh
4AHjvXLGgnVEAHzz3cZqErFug38Dq7alnPmP6n27jSzqfsIZGMrnDAzh8Yr5j0Zp
3YYvnCSyZYknHej/dsSvNSDxv8IWUGpSk2bCbry0pKbNhdHf4zlQ1AmqdxDIACjO
DoI3LiR2EFVJLEkkOIzYQh9I1DoIKDg6CPY4g1+85IIHfk8fvpthHzYnSmG4jz32
gAc89ig7CLxKAMA330G8SCLWQfDzCn/GheB3630NN2MnjYszLkQ440L5nHGhTM24
kAqcJLJliRfeFaKX92MJqFkTwf5PclJ6aqrwbSFWMNIbC58SqhoCOlDkKap3EWxk
Ks4ugjctJL61pI9JlN5IFTea3ETCNS0EP9Q+VYrHNUoBP3QD3QLSAA9YxoUfYF0E
3icC4JvvItaQiHQRPJCYuI/6qKDa8B/VTAtJcJLw4gLBSSLdRTQiBbYSVEjTQryi
IxGgOBUdKCmmhbAdAACvvHKvJRFX7oICzVLMU1Rif6aFhLmDrqQYLy5JcJJIKzea
YA3isReUlpIsvKlISUpJFqbsyUlNmqQLQQcKQKuuyrgXKG5VVoI3LgTDwrgbQmBT
b6gg1JS5UFP2OQ7KlCCF426mptiXAyjVdB0pFWrKf5WIMThfMy5UADhJpNUUUkcz
9Gc6qCDGhXiVxB1ApFWy+I0LZcxFmJ20jkO3A784hYcMoNwiIBMRN8WJ95YjbSSf
kbRFgycZXTLcUlpCFxZCWlI5aFqSj6YluBlSuWKKsFwxRViu2CIsV2wRliuuCMsV
V4Tlii/CcsUXYbnKFWG5yhVhucoXYbnKF2G5KhRhuSoUSbnKCWmhR0SI5+uHYcOT
nN1GjUht1KGfMzcnd1TW0JxRDZy5g4ZiT9+YUaNz+g4b7myTNd6Z0iC7cd/s9L7Z
ac4xI7KzcnPYtxBd6UjeUcxNGAbw0AJXDCnbgBjY/nXIpTxJpv/P6pJs19uqOEQ5
RRE3SSUuOujZhR9eM+tJNp0gRUlD6FIyk4gLw7jGPVMxHSSYRCkH2UyXGM7H9XKt
lnwsHNWFdIBsmjtWjhjyXZJHqEHvlIAurgrCbJSFVaKDNQYznkZsaiKQAoPUTASw
B1UAQy+D+MAsQmJTABvKAaYGAIZyBn56kUem68SSsHkzD8Y9A19itXieC7V4njO1
eJ5btXheAmrxvFTU4nlJqcXz0lOL5yWqFs9LWS1eObFTxs8T3mqymijIr6LnTgAh
qCvUB2QOubJlE8gAfIIXlPcqYWOGOs6Iby1JXRe7tpNbBCFVkNqKnubBpZA3CpRx
Tz07IkMKwTWFU3JxfVqPElaUym6gpVMrQy+Xv2s72Sg1JKRgpFyZyQsec/B2Lx3w
hlLeSoBGTomIGahCeacSOnpr0ZVpvVupnS8Kr7dYD8VF+MVq4iTefY4aQkuX14Pg
6YJ6vcubB7ih5cVzHTyv0NPldTV4uqBW8gD60PLiUw6eV+jp8v1J8HRBzfPA+Agt
Lx7B8wJCS7dwbYn9QsurZLYl/EKv85LZlhhtaHnxCJ4XEFq6hWtLoA29zktmWwJt
6HVektpSLfc0LkyeefTZ1jXv4Eu5rZCEOPfgZ7w1SWePn7hEh93LXBF8mdTA536/
wGFDgjcoaCVOkk+li+9oxeuj9FrPXefp8uk8SL7O1OfTFORrZ1Q+nQdw99NrI3+/
IZ/OYrj7o/Mpj9z9xnw6g+Dup9dW/n5TPm0J3P3mfMovrqd61v9V0YrFTpNq6FHJ
nS64LrJeeBWIOUwSKlwNUgoZeMFESC2pIpUVLk/f3DTKbMKHBWLzFRUpVTKqBdR0
ebwS9FJ6vNL5g3pFBhGEJ7bQgkhWCEL5TFRmBeEpskt0nK4LL/72Wad+7lZOGoeH
AsBbtdm02aPKLuZigs23spOefH3hKwggiCCCqAbRc4KQKP1BIQhWAAbvJ52NhoK1
CFEQ4bYIIIgggrQIfPseZotQPu6XWUEYxWAPerm6C3hNaPbsaTdUQRSujwCCCCKY
aoQvCOUCTuFaRLELovhahHKlqgwKIkGY1AJs4bWGZ4MfhbAYJzI0N+M64ZMBfvov
XrH46sJbdAHyKwHidIubBK/TbbE+bLvd0U531Hq3raFDXHqu7sDmmSkSA1+TZ4hY
LayscJG+8ndGoC9ueEsNO5zAYZxXeAUyLuBJVOqTecaHGpwuUWYW4tCPijmodzlS
9QtiXtZXcVytfyhmt76xI44khyEzLPgXP3jZAHXdcwUXI4eOlln8LwSQfH+zCZfb
JbhTnnDZaYMWOQXcbrfnB0ya9BCB2XEDcRMXyaaJ5hNhxuLRbTONV04P8c0cU7rF
pLlOcWKu3psLUOp8xlEel1EcZCJXKYrMKp0H4tSSEt9uyPRs9ZitJPNgufH0DBIJ
SiSUSnIRfpkKS/CDTA7Pd1F5Z9Cf5M7NkMOE3FxSmi45T1YhXVx1XckeUaZ4fOGo
hIIDL8gqsVe/MGZBlMtxVr8lZlRUFcch/YqYmVGlUSWYOnirhPiuSwXiqj8hPScr
VGL//v2eH/CvDsczWylN4VXC054LrhIojq9K4BaWEJ+gWlLKJh5IJVhugVSC0gil
klxBJaiwBD/I5PDSpRJzov629zC4HC9HVY1JNVRxPBMVHdPeUBpVAqqAV7zeKuG6
5LnNG003ugR3+3sKlcjMzPT8ADZKGItAJTy5FFwlUBxflcBzCUuIT1AtKWUTD6QS
LLdAKkFphFJJrqASGCXgB5kcXrpUorPhW3ulaJdjlEEfc5aqRG/D/+zW6NKoEuIe
CaVKuC96bvNG01ddcPLXfqpQiby8FZ4fwEYJUxGohIeq4CqB4viqBJ5QWUJ8gmpJ
KZt4IJVguQVSCUojlEpyBZXAKAE/yOTw0qUSjuhU+0GqEqnRPewvR9Nniegb7btL
pUpAHaJ9VCL/guc2D6aQhyctzjvjgr/LwKszQhslzEWgEiwkDJVg/ba3SrBK4YE4
taSUTTyQSrDcAqmENApwo8GVMUrsjbbYFxjps0R0Q/soI32WiK5on2ksjSoBdTD6
qARRUQnAfc4o1EeViw0UKnHy5EnPD2CjhKUIVMLTUguuEiiOr0qgKbOE+ATVklI2
8UAqwXILpBKURiiV5AoqgVECfpDJ4aVLJeYYv7T1MNFnCeMFW6qJPksYv7e1N5VG
lYA6mHxUwvWv5zYvXLiqMurDXa9dhkIllBMnNkpYi0AlMPUXUHCVUJ84oUmzhPgE
1ZJSNvFAKhHuxAmjRGmfOHU2vW6rZKbPEqZDtrNUJXqbttus5tKoElAHs49KuP/x
3OaFNRcaCfUxs3MXhUoowUYJWxGohOflVMFVAv98VQKvb1hCfIJqSSmbeCCVAJT0
DFK0oAIKvzBKSLdw4aVLJRzmnbaDVCVSzSdtL5vps4T5E9vuUqkSUAd8tKp4lvjb
c5sX1h0QVcJ2+JYQRwl7EaiE55aCq4T6KIFXfiwhPkG1pJRNPJBKlOVRYq95sm2B
hT5LmFfaRlnos4R5jm2mpTSqBNTB6qMSRF0lXKmnbkd9OKdWyVGohNvt9vwANkrE
FIFKeFpewVUCxfFVCXzfyxLiE1RLStnEA6kEyy2QSrhVXtVhlIAfZHJ46VKJOZbt
th5W+ixhOWFLtdJnCcteW3traVQJqIPNRyVc5z23eSGtbwuhPtbHtVeohPJVHRsl
HEWgEp59GQVXCfVXdezrSR6IU0tK2cQDqUS4r+owSpT2V3WdrYNslWz0WcI623aW
qkRv6xib1VYaVQLqgC8tFc8S5zy3eXBgwfxdowZ2RX0I36wFXoRlo0RsEagEpv4C
Cq4SbFnUWyWwrYklxCeolpSyiQdSCZZbIJWQFlm5xVZxlIAfZHJ4aVIJM9mrOx+D
fWFndVUc4r6wKg5xX1jpUQlxZ5xcqygJrsTW48qoL/Eh7q3jwdpXOPJlPKuByVdP
jkVbHR1M/ziijUmOOqaDjqrGmx2xpneofFOjRPkaMkOXb2qUIVPMoTihlK/cDv1L
kN+bx+IqkEYChzWJ2KYh45ECn/iQF2jgxnkr+NAWC+hCXyMgUVib69ltUO6QnIZC
7WJnAiB+GG8hR5Ogz98bsDNdLJOBdldG4UT1oeQkGUbdBq5w6hV3iin7QtYb7Ke8
Ru8S9lOeozqD/ZRw9Vec3ugC1Ho48g1Nb6aRDFs33XWONSTHlqy7HLOdTLQl6H6k
DwrJOkm+BdCbZB3JnEbd6xzi5t8MOjZ108kuwtfg/hjRzbEJ93hchG+n4cgf7kSb
aL+IuQj3la+oN1OiwtWbGpdFvbmZxqnpTUWC7QkV6ZDC7kwUzt/qrHaUR0NhizHO
kgCwEonKdlVjjR1PneIaJfwYu8W1wP9CvfTkOn1vi9U2xNpO/5DlhPUWa1/9Aste
a7JV7jYLUv2pUSRTyKBYoV79QHjVb5Cqf6Wf6q8kVH9dr+qnV6rV7xwxfPSg3EFj
cwRDbqNHDMnJGdZQOBwrSiqlTnjisJCN6ZA/yhf5diHm6wu5XZyJ+cF61LHQXsFh
sW1x5NoTHdVtKxx32bnhtG5B2oWh7lHK9g+URbgLaTpnYmQX4VtouMUmurk0vALn
InwFdatLLsqRyLkI99cuZlnDbRfLpOH0LaI+nCIVvHzjh1PUWa8UaTytLZCIs2Z+
PBXFbxSK5n9sFauq+CrZIcxJK9GxFXNR/A7pDA6rvjEVqF5f8LFVzybXxQplJcuz
+CWCmvHwfXwSgdJ6nrOImOYSJ+pHYiED/8KReyBc2XJnbQ1u+HIHhSZ3HsHkzgoB
N3y5w9XkziOY3Jms2dqCGoLLHXdqcucRTO7sCm74csfdmtx5BJM7W/uDG77ccbcm
dx7B5M72TsENX+64W5M7j2ByZxt04IYvd9ytyZ1HMLkzecINX+6I1eTOI5jc2eok
3PDljrs1ufMIJnf2Phtu+HLH3ZrceQSTu7BiJLnhyx13F5fc9aSjeZq1l+V+2wjz
GmsTS1fbdPN2a1XL9ULRfeXOQylz/CIDpdwLuzjL15y47IZFN+FAZTejTRQo6lME
f4eFnFDjhV9IlVP1hVyHX1j6WbdZ77D9a5lmfdaaZCtvXWp9xFqpjNehuJ0iyqsO
UWclsgrbRP9qvd141DYwurytofFtmzu6ga2icXkZr0K8EwlfDX2XuwtTj7gzeD1e
Mq6wLjbNt9UwfWAdZxphu9501Jpp6lnG6xGfmeKPr0ekFEIlRloRu5mJra1ll22c
uabNaVlmm2tuYTNbZvIV6CpQBbo8BMWG4q9AfBSppoiNk5LHKesQcuFfRhdlHcqp
+kKuw32WX6z51pdtv1vibM9a59hs1rq2R6xjy3gd4iu+0lOHu401bG+bTtpOG2+2
LTDttBlN99geMq0r43WIV/dqdZialFIC67Bz9IO2VsbW9lHRebarjdfaZ0ZvtumN
RnTyZbgO8Z2Ueh02K4F1eLd+g71zVG7Mw/rP7PWiusQs0v/PHh/VTNgjVXbrEB/2
qNVhclJ6CazD96Kus79u+Mn+U1Q7+zzDe3adoa99vGF9GddDfImiVocpJbIOH9T/
bGsetcmep4+1V4iabd+sr2O/oB9TxusQn04In0y4GW2iQDlsdMmrwR+iBtiWGRLt
FsNM20SD2V7dsMyWYzhTxmc0+PCltNSgNbpV/DFHtfJJ0f3jtzr+LXdz9IT4FxzH
hX16ZbcGY4QaHONVg/SKtBuVNd7Z0nlnt0Rn15xs6sM+VmeH22LuyM3KHTQ6d1D/
rCHOrGFZQ8aPHjTaOWDU8KHy1fABziHD722YOypr2OgBw0cNpfdnZ+VmxXTKGpIz
2jloWDa9OZcG9hvvHD1yTNaoHOfo8UP7DR/i02h8FxT+i1WhR/UWx3VR+xxr9Q0d
l/VrHTv0bR0/6p90gKrsNhyH0HB0Xg0HKaUqK/G/13yDweLIM+xz1DU0dDxoWOtw
Gdo6sg1lvQJj/VRgWsmrwFnRFkdd4z7HxuiGDoNxreOD6LaOX6LLegXG+anAxiWv
ApOtFsce6z5HN2tDx2rrWscQa1vHXGtZr8B4PxXYtORV4LNmi6OpZZ9jm7mho7xl
reMLc1vHv+ayXoHl/FRgesmrwHImi2ODaZ8j3dTQMdO01tHZ1NYxylTWK7C8nwps
UnIqMMHldqPw03UPC6Wp33rIYiEJ7KSaTJxGXznx8BfOAySMDkcSud1u4XAKfGWP
a7g445Gd6VRaaK5E+OM1FHmUNBoNGjQUP35xGwjmAIScEo46YWNlY/oLOjho0KDB
C6dInMFrLuzRIn8jXSijoUaj0Wg0pZdGHlsx0rKx1R91KClqNBpNWaORtYg6mhZp
NBpNGDSyFhmI9pynQUM4kLUIp1JoWqRBQ8EhaxHOGNG0SIOGgkPWIpwYo2mRBg0F
xy8ut+sRzx6QRR7fcoLzUeQV/RWkChFXIJQWCsRrV4ZMga0h4u4SEeL+mXzXBrLL
IqaHtAWrQeMkAxHEe1+Gco+G8jogMYMaDVwlPR8nHNk2TmRZjbbIIDGOnPg8lPkp
rwMSM6jRwFXS83GRZhw/Pg9lfsrrgMQMajRwlfR8XKQZh4IgD6ZoyvyU16pMKaFG
A1dJz8dFinG9xDgY5vPg/Uo1EOCPmIcaDVwlPR8HxlEof7RFBcY48uPz4P1XNON4
uuHz4P1XJuPnRcZZHkKO+b/exOcXecbPC1+FqtIWCc5PdCmD/MEnfz7AJ1KCGo0a
M3wcb3ZJjTbS8MmfD/CJlKBGo8YMHxcpxjeQ+XFinx5PxLkcFIzlzufK+yPf+COh
9RLjSuZ4vzJOgD9iHmo0cJX0fFykGMfsQciLiPmUmSkNY7zMzeUY44HmcmrXAYkZ
1GjgKun5uEgzjh+fhzI/5XVAYgY1GrhKej4u0owHmsupXQckZlCjgauk5+MizTgW
F/k8lPkprwMSM6jRwFXS83GRZhyrNsijzHVuWNBCHmWOcazK8Xko81NeByRmUKOB
q6Tn4yLNOM4s4fNQ5qe8DkjMoEYDV0nPx0WacRwnweehzE95HZCYQY0GrpKej4s0
48yoOwtW5qe8DkjMoEYDV0nPx0WKcawCIC+WB3J84P4bbuHzi/xDyvniW5pIo/h1
mClDGe4PPvnzAT6REtRo1Jjh44Qa58KVtJGGT/58gE+kBDUaNWb4uEgxvoEsjhVn
6vgimS1NMKMwfK68P/KNPxJaLzGuZI73K+ME+CPmoUYDV0nPx0WKcXSpYLxMLk0w
u0fIo8wxXiaXJsA4G91ZsDI/5XVAYgY1GrhKej4u0oyXuaUJ1qsHWpq4Int1xjhb
mmDhvP+KZJw19TK5NAHGy+TSBBgvk0sTYLzMLU3gYZgNZQBy/N8nulv5/CLfuZ0v
3if0qtc7M5Th/uCTPx/gEylBjUaNGT5OqHEuXEkbafjkzwf4REpQo1Fjho+LFOMb
yGabOG+DlrMndGY+lM+V90e+8UdA69GzgHElc8r8lNcBiRnUaOAq6fm4iHV3EuOB
NoIqhSLAHzEPNRq4Sno+LlI1zhhnT+gsnPdfkYyzps7GkzI1iQXjyI/PQ5mf8jog
MYMaDVwlPR8XacbL3BM6YzzQE7radUBiBjUauEp6Pi7SjAd6Qle7DkjMoEYDV0nP
x0WKcUyUWW0DyHHyvQ9dubN3CteZPY202Xsw+OTPB/hESlCjUWOGj4sU4+LsHY2d
zd6hYOyQZD5XZQmU1wGJGdRo4Crp+biIab3EuFKzeb8yToA/Yh5qNHCV9HxcJOdy
7DM/Pg9lfsrrgMQMajRwlfR8XKRqnDFeJt+vgfEyN3tnOh5o9n5F6jhjPNDs/Ypk
nDX1Mjl7B+NlcvbOmAaQ47r11vZ8fpFv6ueLdfbufq17hjZ7Dwaf/PkAn0gJajRq
zPBxkWJcnL2jsfOzd3aoA5+rsgTK64DEDGo0cJX0fFyktJ4xrtRsZX7K64DEDGo0
cJX0fFykGMcgCsYDzd6VQhHgj5iHGg1cJT0fF6mRnTFeJtfewXiZm70zxgPN3tWu
AxIzqNHAVdLzcZFmPNDsXe06IDGDGg1cJT0fF2nGy+TsHYyXydk72xkHIMfoPpeu
6LX3vMyPWmmz92DwyZ8P8ImUoEajxgwfFynGN5BNdnEbKL5gYztnsDsS4HPl/ZFv
/JHQeolxJXO8XxknwB8xDzUauEp6Pi5SjKNLBeOBZu9q1wGJGdRo4Crp+bhI9fOM
8TK59g7Gy9zsnel4oNn7FanjjPFAs/crknHW1Mvk7B2Ml7nZO2OczeBZsDI/5XVA
YgY1GrhKej4uUozjCYF91wIgx3JvXb6iXzq4Wp/rm6EM9Aef/PkAn0gJajRqzPBx
kZq9hwqf/PkAn0gJajRqzPBxkWJ8A/naKH7LhH6dPbbgBQTA58r7I9/4I6H1EuNK
5ni/Mk6AP2IeajRwlfR8XKQZD/TYckUzXuZeOmAsYZ/xAchx8pEqHfj8Is948Q5w
yWee7a8NcMHgkz8f4BMpQY1GjRk+LlKMdzXXowNc77FZQypTd/52OoG859SSfcMO
d6uwa0mlfx7t2rvb7kk1v6zx5cYXG/d7svGK1runT3fqynX9ruPhgzurtrv2jSUb
8+bF2a51R9tWJI6LSc9/pvu1Ncp9Z+lpPzfrV/v9v4x+/FTuB1tvf+eW+c8e//fv
eyb9eG72kj2vnr7R+uS9jzjPX3rD2fPbGX9tWLNt0pax945MiE2v9Eri4T49ot76
377o144f+tvZs8rOI6s7bRy4//LKXzuMuf7k+rxmJ2d/mPHF8glLOl8b8/s9z6z4
6vtPbIPPpb17/r79s//5+qP7j984tGXLbj/NTXY2W2s82bDq/3KaDDz11+7du5Yk
Ht565Kchpw7/PPyVdtfMvvndNm1tn6wZN6HJ6XYH9kxMqLB36fKhY7K++Hj02v2z
o99pc0etQZfGLz7St8Pxh/Z+/++jGxf+PL5/0pptq75wvd/05+Mj13Quv6BTyvun
7jn2531vXVp8+6pLnzQfMfHZOy+uGt328hHL6svf7/5y3nzT+FWvVBjQ4acR9T5+
ffmsU9Umduo4cX7z/B49X5rw5BffzH5yRY9/jauGvn74jcqDGp06t/yepXXPD/7z
pdH/PPrV8uP1lid2+PmLC1cvH/J9+R9/G7bwx9sPvnRgVKb9r2uHvHCrbtept6JG
dKrvcO6L6alrkBm9zn1gLNlwq7vixkNTFr+/Kr7Hob59Gg3/c/P4wztarb/09kdb
3ln1c6Orx0wpf2wdTWSztQ69ZdmCqB0V171abcyEqlk3L2zb0DTti6yk4X82e+vi
P79FX3r9l+c39G36P7Np++1rf8gfUdGRb+0JmgY9B2177PrWk+dO7+2w31ldt87d
fT9NcfL8vy4/N2aKLivutSoJ9zz6/JYDx0+aPov66N7pf4355sKectsfHrF/cPPk
B20mp3GnkPNOWtiZSGPjZw9dNWaKoXq8cOcKeuec0fuGPRv7fMbANijU84O6mP5w
3yPkcu1GfY/bP3r4mLXHoSMrHZt1b6z+If/M1afP9nh8+YTfGyzY99PlMS9+0/Lt
9XOSq3dELt0XkgaZFWnCGzJfuJj0P7OldQ1aii2OW8evff/ToV2+ODv+73Njlly6
XHNK1LFm848RmZt9yx0ndVtp8iOiW8rCmnTtGFfsSUFWnzz9xgOHW1x6bknfl87+
89yYi8tub7c5bkNvGrV2hK5Hfn2aD817/R36HlRytRqajDSVMbvTYhuceml9n9df
feq+wYf/affRc0Mmrj9018QBO6r1rdjqi4lxey7dde5063nz3tBfnD7juz1f/L61
5pqoDeMOTR32bc8ty65f+cLBE4tiX887MX9q1987Nhzf9+Dub+/84u013+W90DV1
3W3mN0deWvFN2tT3Rwxf03LkuafmLj3y23tPP7Vg9rDNN1S+9cZLG+otXhofM/hM
ja3btrVq+c8fn9af2iO574trKlRcY2z05OeW4Xvbv/fFmy8OvPDg/MttDt747L1/
7V538+BN9Ros6vXv9toL68397fsP30j7zdVx989jqj25Y8dNfe6N/n3+7n8XLrz3
YI3aK9cN7WhIi0691Guze+GIzx+o8OTHH3dSpRjRZFPHn2/v6HA8tGkMCrDl8Rnj
BzTs12/3oV1tku9wRt1Z/qNXr32vzThdhT3vH5gye0bmSpdxQ+0Fg1rO/PDTT+et
f2Xy3+1/mNhxT9p98eXvOJhee/IifeXNz/Rc+Wfd2tsnTs68cdhbXy40D7BmHx3c
b9HB5QsXtht+bfl/1pw/2qtjx06PLVz48uspKa993H/y2hk5vR/vV2MLsZ44Pni7
d87tOiZXG97o5ZT4PRU+yD+wM3V9u5T4b+PL73n/68eG8CxMOZJF775quxj4zF2d
Ol8qP3LlmW7v7bSdu/m238a3Hv3ZKz8trTfk52u/jJrw+oH8lpvvjU89fXH8d6cX
bX/9dPOJ39zR+oEv/1r10/F937WY0eN4xg/GMQkVhn22bVfCbcmVW3S5Z9rWJTFj
jU/W6byo3Y7Fd3b+ovbh7s/vOJl8/SzH8h0nN3aaTp2KjT7JGjb05MacrTS8RYM2
j36alTuuh3fMvc/vOL/+oeOOHS03m84dvfaVq6mT2FrwH+7fI+rc0aVtzfA/MmHP
YOq8Yj4G/6qvWm5d8uDlRgNSzpbrnTMsu5yrnFs0/2Ih5ah70/ChIwYNycl21nLe
1Ca1ycBBxEoS6dSoK50zdpRWezF0OSSXG3nKLCAGyAiAXMqTZPp/ZXQDm9ma4NAL
cooiY0kquYHgZAU6F6WSrEqfP7LpVDxKmHkSspTMJOIZ9mwmOlX6koVReOC+2yWG
e8etJuK9LJyfXGbT3FM9lITkuySPUIPKlIi7k6uC53sSpFOJtCdYBE6RabzSS+P8
sIDG0ITzp3P+PPIBEZ/AsLDMpwqwUjPwOanF87mrxfMlUovnS6kWz5dcLX6eYHEK
nEBear+KHgo8h+CVKVpKLBGPBkStX0VaEH8400p0E1zydT9BG68RUrcQG01XTGHq
z7dvvnaqzTUAONFJuoOhG3d9CuKn5UIKVlomh2oZern8X28UynCVkEIs5SSevEDa
EPEtSSAo5acEaEpiSuvdbMGE4UWSSHyPeguE1cRJxJYfCKGly163A8HTBfV6lzcP
cEPLi+c6eF6hp4u1OIbg6YJayQPoQ8uLTzl4XqGny9YPgeDpgprngfERWl48gucF
hJZu4doS+4WWV8lsS/iFXuclsy0x2tDy4hE8LyC0dAvXlkAbep2XzLYE2tDrvCS1
pVruaUS2rSnPPH6s+MnmPj+OaeXWs7kHs6cJ1CSdPX52j+zqPflWEOZAgYDcGe4X
OGxIf7+RGnKwi69zAa1Y7AWBCz6evzOuQHfWEVpmVbKJzk8vUSmL13vpdSp3PUm3
ic5+5etk/SY6A5avj9HrJtz1E1Gb6EwY11N5nnzhKdk0SXqPSu50wXWR9aQBEec1
SWgEapBSyEgSnLNkABEnoQJcYuMxYAZKLl6+SP1ihYqPLPv376fVxVJBRdAbSG8i
3sV2B4BKhiufPVoEb25AaFShNXYeBb/DWzZxLk02MmpJnQLfJQLyo4CbFtNsAv8i
lahGqYJMRdR0ebwSWKfgo5IqUO8UgiiQJ7bQCpQsKRATBN+vAmVWEPxAD3RzrZja
8sLBO98Wun7xAdPfMNHY5fFK0IUkAhG+ggCCCCJIl0p4QUiU/qAQBJ7oeXg/NW80
FKxFMEGEIo6wBBGkRXgJQtkSGMQElC0Cyxo8yqwgsLbDo5eru4DXBNUQV05CF0Th
+gggiCAKohpKATCICSgFIQyhHArXIopdEMXXIrDKx6MMCiJBeEDC7ZXEKJpJBeIZ
Ry7DFRmam3EduVqOkcDHV5dbFqdrTve1BHQXDG9aE61Zsc7ob6xma8tYcTm+Ku2e
zpApEgNfk2eI9z5XuEhf+Tsj0Bc3vKVGiMhhnFd4BTKOJHju8IX67I7xoQanS5SZ
hWyNtsZMMLZwHItOirnTmOD4MLpSzHBjsiOOJIchM7wEKX7wsgHquucSTNB09KEN
NrAxggglp0V6T2W2i7Of09Jqu24ZY3lxT6XmLjtt0Hgdoo5Jkx6SvlcfS24g2TTR
TcKVPMUx03jf++t5lG4xaU5LUplwk0i9NxeglA0Yq0EgQyZyleIKbLKE+ASRlLLy
xTc+Mj173gcfzM9DSc8gRcNV+i9TYQmuRCaF57sIcWVQP3MJF0bhdomuyyXnKTY9
vJWq60r2iDLF4wtHJRQceEFWiWHGjfZEUwvHE8b9drMpwfGAcYvdaSqNKhFDS5Dq
oxIVVPh/ZhFF5aYuwe2VoVCJvLwVnh/wr84otBi84SysSnhm0QVXCRTHVyX8NdnC
qgTLzV/6CKY0QqkkV2j+VFiCH2RyeOlSiWqmW2O+oSpxk2lozJtUJRqYusd8WipV
wkFLkOajEv0veW7z4PHtf9a96/Gqro/3UHRMVaiE2+32/AA2ShiKQCU8z1MFVwkU
x1clWKXzQFxhVYLlFkglKI1QKskVVAKjBPwgk8NLl0p8YnrXPsfcwvGH6Qf7YHOC
47DpY/tkc2lUiVhagsY+KvHyRc9tCtQR9xkMcClUAkuf7AewUSK6CFTCM9svuEqg
OL4qgVtYQnyChVUJllsglaA0QqkkV1AJjBLwg0wOL10q8bB5rr2VpYXjBfOr9mss
CY7Z5sX2NEtpVIk4WoImPiqhU1EJtvVGGCXsNylUIjMz0/MD2ChhLAKV8DwJF1wl
UBxflTAiSgHEFVYlWG6BVILSCKWSXEElMErADzI5vHSpRKrlPdsZqhI9LD/Z9lCV
uNHyqe37UqkS8bQE6T4q0eWC5zYPxAmTy7MbLbRnCVMRqIRnta3gKqH+LMEfqs8n
WFiVKLvPEmbSPfqPGKzSjY9OcIirdHCxSpcShkoot5EWD5ScieuUcq2iJLgS24Qr
o77Ah0Va6eTBWk048mU8q4HJV086mhJi+5m/jR1hahF7o/mt2OmmbrG1zcvoDCot
SpSvoW7o8k2LMtSVsihGKOUrt0P/EuRXSllcBdJI4LCZTmzT2KI9UuCTbQdu4MaW
d2yhFQze5bM7E4Xhr2e3QblDchoKtauTOh3xcF4LcVXDGvP3BrwnFMtkoN2VkdxH
fUPpbxj9NXCFU6+4U0zZF7LeYHV7X3QLB1a311Kdweo2XH0pGkpC0xtrgFoPR76M
ZzXIevO44aSte3RuzCsGuz0lukvMR4aa9srRzWKorHSSfJ0FkK+OOB+nBcml98M9
aSO055NdhL9Cw7tIrt1OW3207CL8IxqO/OHWpOGVo2UX4b7yFfVmSlS4ejP2sqg3
I2icmt5g47hgasbN7kwUxkjxy5EG4SjOyWJWHD1JN9a2jrM0t/U2trd2s1S0jTL2
s7awXLTKHWJBKjYtijiFDIoV6hULhFexn0gVu9JPxVYl+BakkVfF0iv526AROaP6
5wzLFes5pm63USNSnbk5uaOyhuaMco4YPnpQ7qCxOfUaCh+I4AMXwLcB6IR3gCZJ
mFcJfuC/aRhnYn6wHnUstFdwWGxbHLn2REd12wrHXVTDUsMYKVPpSHmUzmJ+oA0L
7kKazpkY2UX4FhpusYluLg2vwLkIX0Hd6pKLciRyLsL9NYxZ1nAbxjIiNoy3iPpI
iQ89BI3Pl4Ilje+VIg2VtQkyEufW4hf3FnI0CeJF9kahaP61v7DDppiLL1glO8hk
Ot3cTYdNTDPxmxNNHO9EJ1OB6vUFHzb10ry5eKGsZHmCvoQ0I+JrRAzgcH2fjESg
tOCIAektceIOiYUM+MOReyBc2XLHmAu5ww1f7rhbkzuPYHJ3CGGiG77ccbcmdx7B
5I5Vd8gdbvhyx92a3HkEkzuGa8gdbvhyx92a3HkEkzvWDyF3uOHLHXcXl9z1ZKM5
wbbVYrbvN7ewLbJ8b/vF3M32sGWPMDmU5O6S5c5DKXP8KFwegmKDUu6FfZrha06c
piYQTFNpmJvRJgoU9SmUT6WoK3GOyualyAk1XvgHDzlVX8h1+Ed0Ffunxu/sCUaX
fb3xHXuysad9vnElClaG67CynzocljQ6SVmHkIv3ykLR1aGcqi/kOswyVbHfaP7O
PtXksl9tfse+xNTTrjeX9Tq8ulTUYYLL7Ub5p+seFkpTv/WQxUISWIucTJxGX1Hx
8BfOAySMDm9x3G63sDcALzlxDffkyZOe12ClheZKhD9eQ5FHSaPRoEFD8eMXt4GI
U/5TxBUlD5dYPQ06OGjQoMELp0icwWs67NEifyNdKKOhRqPRaDSll0YeWzHSsrHV
H3UoKWo0Gk1Zo5G1iDqaFmk0Gk0YNLIWGYj2nKdBQziQtQhbxjQt0qCh4JC1CF8t
aFqkQUPBIWsRdjRrWqRBQ8Hxi8vtesSzDWSRx7ecsJPbxBX9FYI5DKpwPl/Diteu
DJkCW0P4HYHiFpp81wayyyJuv0baMOUJW7nMVAi/L0O5R0N5HZCYQY0GrpKejxO+
hIiAfUPGOHLi81Dmp7wOSMygRgNXSc/HRZpxtA8+D2V+yuuAxAxqNHCV9HxcpBmH
giAPpmjK/JTXqkwpoUYDV0nPx0WKcZgLBeNgmM+D9yvVQIA/Yh5qNHCV9HwcGI+I
DVOJceTH58H7r2jG2ZEkLJz3X5mMnxcZZ3kgxzZtTmbw+UWe8WK0WjsdMLd0KcP9
wSd/PsAnUoIajRozfJz4RaMcrqSNNHzy5wN8IiWo0agxw8dFivENZH6cbAqNmWVn
Ztn4XHl/5Bt/JLReYlzJHO9XxgnwR8xDjQaukp6PizTjgeZyVyTjmDaB8TI3l2OM
B5rLqV0HJGZQo4GrpOfjIs14oLmc2nVAYgY1GrhKej4u0owHmsupXQckZlCjgauk
5+MizTg7RIwFK/NTXgckZlCjgauk5+MizTj78LPMdW5Y0EIeZY5xrMrxeSjzU14H
JGZQo4GrpOfjIs04Pr/l81Dmp7wOSMygRgNXSc/HRZpxfO/I56HMT3kdkJhBjQau
kp6PizTjWITm81Dmp7wOSMygRgNXSc/HRYpxrAKAcZYHcvyu70tX7tLEkJ3bbr7w
cxOXMtwffPLnA3wiJajRqDHDxwk1zoUraSMNn/z5AJ9ICWo0aszwcZFifANZHCsu
S2B5gi1NMIvwfK68P/KNPxJaLzGuZI73K+ME+CPmoUYDV0nPx0Wa8TK5NAHGy+TS
BBgvk0sTYBz58Xko81NeByRmUKOBq6Tn4yLNeJlbmmCdW6CliSuyc2OM82dSAbz/
imScNfUyuTQBxsvk0gQYL5NLE2C8zC1N4GEYjLM8kOP39Rq25vOLfOd2vvie0Gt9
cMfkFi+0dSnD/cEnfz7AJ1KCGo0aM3xcpB5UQ4VP/nyAT6QENRo1Zvi4SDHe1fwA
bVS9x2YNGUzdvb2pft1z6q6Phn3uqrDk9U/a9mnTYfxTTxs61P9ycvamW/t0rd6k
xrK2LdJffHLz+hnXtJtTz2I7dCTzi+j7bnRHX/PXurdOxM7tWWOTeXT/9zueuqH/
24/v7D5sxQefjtu7Ne3HpWmvf36r7Ya3xixN+etUTP8OTZZPfHjSQ73v2vvangH1
fmz2wIQZ99c9c65Zq9/c5/Y0+Ti2/4XRnQc+V+Wx12/65Krl93zSYWve2l0rV/50
YM19PQZ3Sjn7a3yj7QPrbr/tRNvN2x9/770H33mqz/Eunb5Obri2X5/XP7dt/+2X
KpOqVamSa715qzWveeXV+8et3j71yaHXD6jYaVffz1/OjvlmTMyqpB2bkobtWLdj
pPneX6pV35tY/sCxqxveWWn7NY1aH7ruxLwFD3d5fq7zdF/7G++PvCMnrUJ83Pzz
3U/0yfnq02v6PNNjw9CDIx8Zc33VfXUvkQef6nV3ys8357Z9aM+ynwd8ufazsVnu
p6vPz3m7Uaf71w58dsxVvS5u+/b3Ue/eu+mtcxdTXA9umrh7+KNTsrrufGj2rVX6
/vF1nSljV8fu0a39+tbXJp19qff9lfdX6/lT6hNHxjYZmnF/pV8OTj7VLca0vtqW
B1Zs11d2dDl4fOQbIxb/YXX2G97vy+wdWx9xNRi7dVi3ux57rFGlSVE7to0eO2da
4yrvz6n2+xjDoul1Zh1vc1XyjORnTp16eej47T1n2dwVP7Tl7e3Ur9amJ3reuq5m
j15k3S01e5Rba58+8sFK71l/7P/1jnbbjtx6eEe1q1o1nXr88vl9JK31DYue3FP5
sfempNQdjbvaJ9a2l2swo4mj+R/9pv6+v/PKWp/vykzJyj706rHlR2KXWk7ce+be
qZZtE3sPrDN6bvN+mxYmG3Mc9IbuM96bkkFz3lX90XvWjbjU+OsP7dnGWpXK78rb
46LB9UFYq0ezSc+cyjamPlLuMct1nw+YWyWr7lXjtx2o02Hf7uHjFy1/tsW2PRP6
Lsuf0z3lwoXpP877es+RJ//38YMHhva5efHRyUNPdNmS1GxfgxM3vfBe+fu3t/5t
u6v7b20SR1TbtebNx+dclX7kny7z01b0mXnv+/98vNTcQj9B9/qvv4x0Djk/8c+r
D3etf3L2Pbcd/e3tl7Zn3vxJva9qVG0T+1e/CT2b/H17xfGrDR9lz00+P3KqqfuG
0brVb1f/t1Xd25e8VHXX6vaJ21tn1+71ZXZ2/ac2vf3vb3NbflD72G+Ob2v/++9z
OfO7z913+6I3ZjR7pUJ6fNagocucdzw/a9t1x7PLJw6dNuTlN96os3bd5Afn7N7S
aeeiFzbOMHe4r3z0ImvOJwfaPJF+U3r8pMxnDteuMn/8s9PTOmSVj19wsLY1teLu
vLUzauLud95JCnT37Yc7N/hg1b3l9ws33TKqyU+Xz02pcabjVzXL/1L1xz49Un4a
8XId/ecvtzt03akPb77pl/gJ5Zzbv338nVcQ2PSTMY9HZU04P/rfi8/81HvXzK9m
Hc57feH7tS/MfuvZvC/e/PDN/Q1eK/dMxv7y06ZMqjblukc21Tu9ZvX2bllrkrsv
rN+x4gLdi9u7HTNf1S1ryJCZ1s+fvOU7a/kJO7/N+8rW/O9qKybOPts7Z1h2OVc5
4QRBPZ1QV6Vum6zxzsaCcQRnp5tvddYVzCQ4YSWhQT069YQdmq5RhHSUpt3oFnEc
dXF1j6UNEANkBEAu5YVjeFdG17VNM1VyRAlyiiIzSCppS0QTZHYDDq3Uk2wCaxPi
rUvJTCIu27JZzlTp7E1G4YEzyyWGe8etllwWzk9csmnu7EsDIN8leYQaVKZEXLe7
KgiPmQjDsFhJOP5SLxw0zNCc8+eRW4i43IgfTwWwUjDwd6rFzxOmv0gJ+eNX0ROC
gzrLE9h2aCEnoMCZVpLH5bl2HRXYcwqplSMVaIpcCmeeEintG0WXYfor3PVp4aOO
6kIK5alErlItQy+X32vXRkGDrhVSSCCVqUxfIG2IKGFWVjUo5aMEaLiURJGpQnmn
EqApujKtd6PW+MKoH3gaCKtpnYk1HwihpYvHaIbg6YJ6vcubB7ih5cVzHTyv0NMV
zsqWEDxdUCt5AH1oefEpB88r9HSFc4YlBE8X1DwPjI/Q8uIRPC8gtHQL15bYL7S8
SmZbwi/0Oi+ZbYnRhpYXj+B5AaGlW7i2BNrQ67xktiXQhl7nJakt1XJPI+KsBJBn
HvECRrZy0ySOSkKXD1OvSTp7/Owe2dVz+QYqAYDcGe4XOGxIf3WEVlKD7KVzsUuU
Y/H6DL1uLlxPpXEB0IrFTpPyf1Rypwuui6wnDYg4R0iCQNUgpZCRJDi1JEEpT2qX
p0cQlNnUW/CjeYgySyUDGAGp6fJ4JTBB8Y3aH9QFFUQQnthCCyJZIYiKYrAHZVYQ
mMxzoFPutWuAq124FCfdflTH9bjLEywBJ/jzOOnJ1xe+ggCCCMIVWBCEF4RE6Q8K
QcC6IA/vJ4mNhoK1CCaI8FoEEEQQQVqElyCULYFBTEDZImBakUeZFYTSdEQvV3cB
rwkjhfg0GbogCtdHAEEEEWTUKIQgYB+dR+FaRLELovhaBFZheJRBQSQIk0YsWbHp
mmj/RZpEX2YHdxAyN0M02cxPr8UrFi/ahxEAQ28SRCs5VvKy4XXrGlPf2IOGQ9Zp
phtixSW9axyYSBXcStgZgb644S01bws4LLxCWBa+GB9qYJaFLGRX9Fj7AuP1jv9F
P2MfZazk+Cx6sn2mMckRR0qPoe+67rkEU3odnTyLC7b4T4QibfE3m2BLiHuWu+y0
QTMFUQfaoJ7MIG1JNk30Y+FKnuJY6B/atzfqedJcTJrrxD6RPXbgdp4LUDK7tuoQ
yJCJXKW4CWyyhPgEkZRYeTLEVWOZnqkZdukoT8kBlPQMUjRcpd/zk8ik63wXIa4M
6ndBicVbcC2EUbhdzJXzlErvut1V1yUbfpKNSIWjEgoOvCCrxFPGmbZs0/WOzcYN
NpepkiPPuMDW01QaVaI8LUFzH5U4fclzmzc2LHMJrn2jQiVwMi37MaD14C1JYVXC
8zhRcJVAcXxVwl+TLaxKsNz8pY9gSiOUSnI96gA/yOTw0qQSZjIo+mwMRtbZ0ZUc
4sgKFyNr6VEJcW4h1ypKgiux9bgy6gt8lJNmJzxY+wpHvoxnNcj2/Y5FJ8R2MJnj
oo0tYuuYvo+tauwWG2vaE8sZhx8YunxTowwDpSyKEUr5Fta+XzOd2KbxalbNOLyT
oBMzehmHp1ekp2QbHrUbyO5m0duD92/zj+kNZqT7oq93YEa6luoMZqRw9Vec3pQP
UOvhyJfxrAZZb8oZjti+NDwQk26Isr9q6BHT2XCNfbHhxhgqK50k38wCyFdHMsvR
gjxA74d7hD6Xfcm5CE+nbg/JjaKN7FXORXhn6iJ/uNfQ8MWci3Bf+Yp6MyUqXL05
e0nUmxo0Tk1v8AJcsH/pZncmClRs/4hScxDnbSnTV3MKYy0zFM3Rk0ejb7SuNN1O
taWfdbKpoW1H9APWwaaKNrlHLEjNpkaRTCGDYoV6zQLh1ezpy2LNrvRTszWEmq3k
VbNYlGQ1G+O1M6hk1vOZmB+sRx0L7RUcFtsWR6490VHdtsJxl50b+eoWpJ4NdY/S
WckPdCIHdyFN50yM7CJ8Cw232EQ3l4ZX4FyEr6BudclFORI5F+H+6nmWNdx6XiZZ
tn2LqI982ICiw+cz+VIwlTc+pumVIg19tQkyEufK/NCHeT8+OELR/FdyYYdBMRdf
sEqG+fazMbvpMIhpI35zoi/FvBOdRAVaes23o2KaSq7vk44IlBYcMSA9b/PtuDsc
uQfClS13PC9C7nDDlzvuLi6568k1xtetO40P2loZD1nzjD1tdxrPWqcbXULnUXbN
dVcj0iqEm9EmCpT165esoUkz2B02zZUIf7yGIo+SRqNBg4bih2awW4OGooNmsFuj
0Wg0Gm8azWC3RqPRFJZGM9it0Wg0haXRDHZr0FBYaAa7NWgoLDSD3Ro0FBaawW4N
GgqLyBrs3mwTN2Rhqw8sKRjG4ZswEfy+DOUejUWLFvGXgYkZ1GjgKun5OExrUSie
lmaumn5hwBhHTnx5lGW7YhlH++DLoyzbFcs4FIQvj7JsVxzj5LzIOHoW5CH0ME5H
W39lUw3wiZSgRgNXSc/HCftwi/EgYgE7n3exGkd+fB7K/K64GmeM4+mGL4+ybFcs
44EsKQBXLOP8NmVAWbYrj3Gpc2N5CDlWMvl0bpFlXNG5FTXj+d/luXCE/WIi58Hm
jawsDMprVaaUUKMRs1FPHK7QqytqnCMtOpRVxjeQTXZxWz8+k2Ozd3b0LJ+rsgT/
6tEhcghEzKBGIzIXWBRKraeZq6ZfGDDGg83er1jGg83erzjGMV8E42z2Dq3vPr+1
Tz+vvFZlSgk1GrhKej6uuCexwplxXVcL/TwY95q9S36O3OdalSkl1GjgKun5uEh1
d6ypB5u9X3FNnTEebPZ+xTIebPZ+xTFulBgPNHtHKSLKOArF0xYn48wOGgvn/Vcm
49JwxvIQcrzUyms4izzjiuGsqBnPv7xKGM6WEDmPMjWc8YyzcN/83N6XgYlFqNEo
M1LGqXVuNHPV9AuDruZpUaJxqLHUvbUjgXGoxfuGfe6K2/VGvUk1Da927VCvQs3N
o9rqs0beenXX6rVq1Lglv96ocm80GXnqg5Rax3bOb/fBetO3U24Yvn3GdY9ufPK1
j3dd++v1bWs+3HHF7o/Hbfvqz6bbvuo94/ChF3+6K3tWyxdTe5zuveO+C+d+/POR
7/JPN33sneGOjx50zb5813d10g9WbvDXqccv5M/seuGGLbftrP5T/9pPDGt76zUH
52UZDjoHTpjzY7sXvzj/k23I2au/SHzjjhtfvbtZ0qA1bdqnutev0R2L73rqTMaf
F9u/MP7os1v77xg45vHDjmeGtrj2lVuibebuY1cNfrvHWz8uTT02RDfnp6lDd3+x
YGYH2+FpL1ZpNG6o6f0x+8ZGrdg2qUXHfdG/7Xu7huPvHzZX3fVS+5Fn7u8Wd+nb
e4822nP9ok2jyiXc/OEfHb7N+/7vqh+1u/jwna+evLtmxkf7fz599K2bvh756qGW
HZ8d/ua5uEFfj757bdVmWzb3vji04+VvW7V87rOzE2/bdqLP9NSnb1v4fss0c+KR
A4NTkv/Z8eSCH83Jf42xbKwxw3Dy8PJP645Oc/a09HihUtQjmbV6jmk/eT51uve2
z2r7rvXHTc0yOsY1eC0h4bHJC2nw/N52O40/UM/SgzrdB6Ukm3tM7r7qrvE9j21J
X9pi2vGjHaa3m3D+6fI3ZFV559MVJ/JO9Dx04nyvzYu/qmJo8O6a/f0y49YZ1nZ+
8+zG7X/3+s7Q9N31NCjROgyJDZYSq0kLM7n7C+/lo1RLnqC5WnrMrxTV//aN28cn
do4rv7N9Q+OuI1MWbrrt87h7q1T/01jtm3E9Hvr0gfc/WvDQ9Sf/Sb/06r5Hmrx7
4e5KN+6puWFFvL1qB9Pcnn16zpqxeXuDuPZpj1Vv1Tr6vVus3d+b+9rRnK5r/yjX
a/j841Xbd19x7+mafX7+fextlZbu2NrzhvvPbT5jnfT7iYafHFm3aOvAmufPN1mR
/E6NhKeGfz77lfdjf7OsP3ShcdvW8/t//VidLSkNu5/us2ng2ZpHht++4fojiw+u
bp/4UbkBJ75a/fKePTfd/OpVtz+bePezi5dM/HDNuu0Pbuj9T/q8l4ZMS5+X88rr
M7bvaZFd91D2pUmP5RxrdaB2h2PfPnf4ww+e3LBywssjepyb3rJfo/uafH/tm09X
b3P43/T7z2UfW3e6Ye6R49s7XTrxwrlj86s263Hg9KphXUwdN1ue+7lj7enGc8ce
WTf2jRl7nb9PqXds0ttHd48bOvPt+mvOXL4n65Bu9J3NRjU6dqJRSkb6D7yhpCg6
4mZQt+3o3EFDs3IHDR/m7DJkeO71zu7DRmQNGpWT7cx15uaMznUOH+AsoDElwEH8
d1VlDRCDrzGlpaZZ1s72FrEGQU4mcoakknEEH/jjeBIduY76sulE2L8xpSnSyQg+
xpTIMBf+Y96gNKaEqmfh/EAf2JiSMiVC7nGddmfrxCcUxCBdRVPiqMsOmIxY3fgD
ZMcAr4k+5HYh4jM+IKzvSviVtNDJB3mwG9nbff4tf1kGZOQPZ3BumUeCGgKDSdJb
agHEq4H4k5qmnYHBpCb3cQhgbU3Z15V1MGl5dJFZC3lqk0tud17Sq2Rq6/FrEICx
1Vdb+XanQR3qUtO0MzB8+zhIzEtLpbA2gwYMyBmVM6x/jrNfTu79OTnDnENzsoaN
lkjKBJR9nLvWE/lwXW2XcX0ca3MCVV7/Nh6/BhG5s1T6OL7daVCHutS0Pi4wmNSi
nTiGUG5j8jqCwdmNFI8cT7tkw854jVRJOOw1ijNHSMhtnB/P2Qx5ZCARS4Wa5u8A
2OoIA5+KWjyfslr8POEwSH62gV9FTyhkByN6OKFYzRAzAzOraHax6zjJdFZNIcVr
SBVSNZAxaG7eyK5ZCrWEFK4l1YhTSsHySI3790VPcN3Yt2mNWS/PF+7ge2V2zVKo
LaRQndQg1xHZ8DJ49AelnJQATUlMSTMGLSJ4XqGnK5wAKyF4uqBW8gD60PLiUw6e
V+jpojQMwdMFtdIIMRBaXjyC5wWElm7h2hL7hZZXyWxL+IVe5yWzLTHa0PLiETwv
ILR0C9eWQBt6nZfMtgTa0Ou8JLUl0UjjNVKYPPOYUGFDu2MPZLdCEr5mO5M5I42B
jEFXCLoq72uksSH9/UZnFx64fLjwmO28IHDBtwnRbHQLMlDXmTMjvUI3UHcbd22P
GqjrUgRmpVuHYg5S3ODDzEGeFUSHF2sCXGKVShIWwH/+iTj/lc4ofeNFI1rBGwEQ
GlVoTZBHwe9gNkPxmSsPb0vTkbUZiuYYpJF4YtUbiavgjYQJoqpwJaPMCgJWBZCC
/GAj2hU2CdcBOyh2D+fKJreV5/r7wlcQQG0Pq1hu9hGoi8X6dlBBROi5U12E+lCM
dXuLcBnX4YjvnSFmg/BwdFEQudiN6IVwQBYKYxd1zygZlYeIuPJJKe9wqinCC2ek
uFTY71bXM6dwJaPMCqK6cMWvg4TR4eTDQRr8jCgY1AUhdzhY+/URaEntcFBYrcOR
wZqXskoKp2eFG9iBII2k+PTsOuFKRhkUhGgeHgXA9kGguMzDZxv11p0xp+KmG2tb
82I+jMMmxTvsGbF4HVJwa1hnBPriBpMau460efizJltMfUtmbCVzoxijpUXsJdNV
MddausWWPlvYFWgJOhPJCrYH0/31WwUyD2+hrUtPW8Q4wRb2QJ3Q23o2SZpJqLaw
5ZHA7cUFKIPYwsY/70xwkzezMpCUski4xo9ljMEHyiUa4/KFkp5Bioar9Ht+Epl0
ne8iwoDmhpsv2sOWBznRL7pynoyzeyJsC9tCelt+tT5hzYx9yFLeNszaInaA5V/r
NGtpVImKtAS3+aiEMyzz8LwLQCWiikAl8MZQhLtoVMI3WxGRUIk80SQ87/dSCTms
dKnEdusG2z+2zNgT1s9sB20tYvda37KdtpVGlahES9CFYCIlfkIgYvMFj9cD5Ytj
b5XAseC8C6DFGLxUwsCphIX+KT6GJOoqgRfoIsJSCWQCMYvATXKxvaGmErgbP5Yx
UwO4aiqhpGeQoi9TASn9XiohhylVAsC1r0rIef5XKmEmy4wJse3pZHOXsUVsbWGy
2SK2szDZLD0qEZrl92ukCTtrKXAlirCMczKe1SDLF5P5902ZsZjML6eyxWQerv6K
k++1/4l869vxsJRJ2yweltB28bB0JcoXe3kiLV89cZrbWT613WptY77Pst5Wy3qX
+RHLfFsMnV0k6yT5FsDuebKO1BVzKE4o5VtYE8GTJfv2cy6r27e/jmAJNRbjnIRE
4ble8S1eQ+IkyFAsjE5YR7CQjekQM4rh34ZwcVs+15NmltfjXrOujL/LcihunnVy
fK7lbNx46+B42bx9Qao5Nao0VvNGnVjNT+jUzdtjW58OK6ZudmeisH7aU7Ju7yR8
7WK1iLdu7792C2shOnjtRhnr2H83roipY+xg32d0x7Qy9re/YRwYE37tRlHGV9D7
4dahrP7OuQivAzFJbgcavo9zEd6Kusgfbn8a/gbnItxf7U6JCrd2q0hKfPSSuhJj
y6Va7fYq8bU7KeZm63DHlNjlMYOtHRyZsW/HTLamOW7BFC7MLno47Zpupl083Ck0
nUkxsovwDjR8sORm0vDlMbKL8DQaPllyUY63Y2QX4f5qd5Y13Nq9S9LdXJ267mI7
rA414GZ3Jgr14e9jj/Dru7j7agd5wJQQu51OKTFVx2+aqWbs66ZuVL56fcGnPHr2
7FGsUNa3/JCzRDg3FHLsJLnKRzkensdQIqa5xImakVjIwN3hyD0Qrmy5Y9kKcocb
vtxxtyZ3HsHkjrURyB2u72qKjMByx91FL/cEl9uNHKbrHhaOuqhPsIWOkCH0l0V/
/RcLCeIJZTJxGn2Z5eEvnAdIGF1B7dmVZJorEf54DUUeJY1GgwYNxY9f3AYiDlqy
rSoAU/Sgg4MGDRq8cIrEGeQJLcC0yN9IF8poqNFoNBpN6aWRx1aMtGxs9UcdSooa
jUZT1mhkLaKOpkUajUYTBo2sRQaiPedp0BAOZC3CDkdNizRoKDhkLcJ2Dk2LNGgo
OGQtwutqTYs0aCg4fnG5XY94toIs8viWez4PFn8rhMN1qML5fKsiXrsyZApsEeH3
tIhbRvJdXc0f6kWDT29S96XqgsGnhZ2Gf56c8P7WmGYdt3S0J/zwQ37FkcZ63z2x
Ibd177Zt6+hW1e20ZW/jDvXf79dw1UOmG8kNZzptrtG55e+31x17asqjO2/tYLvb
tPTVWiN//7fVX5fHL2129/El19zVxjzxQXeX9Y+Z7jz/9+8nln5TZ1P/O/7nGHxh
mvHy1p2tzudf/jJl/LZ39w1NvqfXvsdttw/vNPOe29r02dy/14Zf074b03/1hbvn
3pXVcPmZmFunPnvhy8Prv6j6r3v5gjG3TM5/bPL02jX0W9zf3xb16DvuYVdldP51
ZOWnYw4+v7ORNT3JenB05R2NE7/L3nhTuZnL189pfe81GS8lnH6lhqXy9fPIypYZ
n71ace7uWzb03DTr5uVvzowe9VVmznsvd68wpP2mgS3vrtkw/9W2aRdML3TctLDf
ol7tX8nvc0vl19p98+28nNfeXtJl+K/jWnQeXaN2Xt3vfn0y7sdzW1fdcvCTt5qd
qJP+YbdjzRYejYmvP/3LBtvnPBNvWTTg8YvL+uWc+7Ld4CoHNyVsW7erbf66evfu
feS1vsefe2PpgXtePdLv8R+e3nrHvNQ7H95S98lH13z663XzXxjcZmLHPkPiMpce
+3Bq+nvmXz6eb9jw+43dB2Y9t+PQ5lW6jw7Fvnx/kyEtmg1r98/GQ3/PHNVtYP5t
H2V0enLo8MSvW5r3Hrtnd9I3LR3Dzj72xfA2j1wf88bTh+s9eGHdmuS7523+8OU1
SetvnvjTT93+/OOnml+N+v337jXrNbL+3frLjh/d2vSaGf3aL98+rl7j8W0uThmw
+/e9L3XsNbP6gpQ7Btz5zJs3zP54YfMOOTX31fi89spOmfnbDtVeteq5E4PKT1+U
njL0iTsvv3Eou1mVvZ/XjuuzJL3XpQYNDPu6P5twbtaEy69NeOzBr6ZkzJ6wq+Xx
pSOH33juHVo+86UNE+59674RIx7ru2VWZ4fZdubGGaNfOjex5jdbnjTcMmzOm09v
+GLMq/GZLX+65bfnRrZctHf990v2Z39J/85XGdBs9MWoJstO7uZtJhmoClxH3S5t
BeNHztyc3FFZQ3NGiVaRRHtIfbNhLIn4WkXCLiOH5DJ9KcNwQQy+VpHMhga2weYE
R7QgpygylqSSGwg2R+uI3YBjP/Qkm/Y9/q0iTZX2rflYRXLf7RLDveNWe8LEcFQX
0gECW0VSpkTcnVzyScToVSuR9gRz/64yDbmD83fj/N05fw/OfyfnzyMfELHHxfME
nyrASs3A56QWz+euFs+XSC2eL6VaPF9ytfh5wjgCTuTRx/tX0UNxFf1hsyE+7sQX
SziPEHGhnJKc4JKv+wna2EBIvSapTepIKbxT+Y75WybMEymnvyTdIWH6K9z1KWHA
SxRSqEXqknqqZfA+pcT7urzw/WkdIYX6tCyJRD6ROBCU8lMCNF4pKRRAhvJOJUBT
dGXSTkkWETyv0NPFeTcMwdMFtZIH0IeWF59y8LxCTxelYQieLqiVp/MCoeXFI3he
QGjpFq4tsV9oeZXMtoRf6HVeMtsSow0tLx7B8wJCS7dwbQm0odd5yWxLoA29zktS
WxLPKqsphckzjx8rfrK5z49jWrn1bO7Bf1hRk7M4EfiUZMyBAgG5M/g7JZmvcwEB
Tknm74wr0J3i+clVySY6P5XPU95Lr+/grifpNtHZr3ydrN9EZ8Dy9TF63YO7fiJq
E50JF/485pBOmJVSCHweMz4IJBcv47xCsULF0wrxCrqCp3mhIugNpDcR72JfCYFK
hiufPVoEb25AaFShNXYeBb/DWzZxLk02MtgBhrUV4d5HNJtN4D9SBxiiUwiiQJ7Y
QiuQ8iTHOmKwB2VWELXEYAb6eDm5Qrez779ytQuX4gOmn2GCHR3LQT6rOjh8BQEE
EYQrsCC8jrSUKP1BIYi63rGFPNuzVBwmLCagbBH1xGAPyqwg6ovBHvSSTlV+TZgV
iSsnoQuicH0EEEQQQWYbhRAEbuNRuBZR7IIovhaBYZdHGRSEeP4vbsHyJ1Bc5/9W
iHrT+pp5e2yzqG+s88xLY8Xl+KoO7fxfJeSTHasZptq/MbRw3GR40f6mIcHRwDDP
/qkh2VH6Tna8ipagK8FhpxhBhJLTIr2nMtuNGtnyto6vSsvlNcXzf/E6RB2TJj0k
vDzWk7HkBuFkx03ClTzFCf2wU7wIEKD35gKUIZzsiEzkKsUV2GQJ8QkiKZY9A3tP
xOjYG3LwoXxbDijpGaRouEr/ZSoswZXIpPB8FxFPcWQu4cIo3C7RdbnkPMWmh7dS
kT3Z0UI+MdxjnxPdwvGHYbJ9cHSC47BhsH1ydGlUiQRagjt8VKKCKv/AMpfgpL6g
UAnsUGc/4F+dUWgxeMNZWJXw1GLBVQLF8VUJf022sCrBcvOXPoIpjVAqyRWaPxWW
4AeZHF66VOLh6GO2VsYWjheio+3XGBMcs6NP2dKMpVElKtMSdPNRif4qR2KPmPno
L7UXPe8SLl5eq1AJfLDBfoA4SlipfAuvEmyeFIZKoDi+KsEqnQfiQlUJTMHUVILl
FkglKI1QKskVVAKjBPwgk8OVKoEjsUuuSqQaF9rOUJXoYdxi20NV4kbjCtv3pVIl
rqYl6O6jEi9f9NzmwYqFv1XbVGm9S7iY/pJCJbD0yX6AOEpYKU3hVQKPBQIKrhIo
jq9K4BaWEJ9gYVWC5RZIJSiNUCrJFVQCowT8IJPDS5dKHDcetz9vauEwmUwxE00J
jl+Nv9rnm0qjSlxDS9DDRyV0KirhtfVmymKFSuBTP/YD2ChhLAKVYEZNw1AJFMdX
JYyIUgBxhVUJllsglaA0QqkkV1AJjBLwg0wOL10q8ZTpY3tXcwvHZtNv9iRzgiPP
9JX9ZnNpVIkqtAR3+qhEFxXDCQLGLXQJ7pdLQ3qWsBJTEaiEx7BqwVVC/VnCn2GD
wqpE8T5LlGSVMJPvo/6IwSqd2ZDgEFfpEhziKl3pUYnQDp6vKa108mDtKxz5Mp7V
wOSrJxuix8XuNN4Y91n04tg849Vx/4t+NXa6UR8nn1ltKMCpxqlRhrpSFsUIpXwL
eyL5QulU41k69VONsYVWOLM6n93pfSI5alcndTo6SYNd1Yrz9GIxZV/IeoPV7RRD
CwdWt2OozmB1G+6VZ7ChVoBaD0e+jGc1yHqzWv+NbViUO2aPXmdvH3VXzPf6yvbU
qDYxRD4N3FkA+eqIczW9CWe2w/3GRus5SnYRvoeG3yW5Ojsh7aNkF+Hf03DkD7ey
XTg/3uMi3Fe+hT3rva501nuNy+pnvWPjuA6jmpvdmSiMcV3a4nMSfEkSju4U9qT3
YLqjJ2ui21s/MMbZ9kYPs64w/mI9ET3NOsu438rVratAdesSMihWqNctEF7dzgli
jKOhULfRXnWLeU4bfBJUMqv1TMwP1qOOhfYKDottiyPXnuioblvhuEtQkfCGuqN0
GvIDbRZwF9J0zsTILsK30HCLTXRzaXgFzkX4CupWl1yUI5FzEe6vWsM/wH8ZEav1
/+xdB0AURxce4HoDFRE1KjZiFBUhwS5ni73E2E1UFDQoYMNu9MQSW+y9xxKNHVss
0RgbamJP7L3HrrEltn/f7s7t3Nxe4Q7uB9lPl7cz83bevDfzdmbndme2IfGuDr7U
8IKB7C4+mrE3DGtbleH7umAEgrjBsfV6/Qq2aLYr2d1+z/Gq/TBeDGH6PRgnwvHY
BxmCZKGMQTPvKubwO+AXPOVcyhpQWtAIA/KzXMUcrnbF7vbwYdsdbAV2B+q63eHq
9LK7N0qUpWjLyn/WzZTd0+aQT9Gtk/noXssGQgHwOI/oq0jQNoeDgdHMkG6g7e5u
X0XWHHcbK4b4aQcT5g1hOYsXp7sm4Q5m+66V3l3Th+k9MMUC3gPUde+Bq12xuz18
2HaH9g12B+q63eFqye4kHNkdZtjB7kBdtztcLdmdhCO7wzQu2B0v1CEGx3aHq9PL
7t4oWBmq81G90NVVNtVdVp7QdVDG6VKU27J4L/0Jgl5aZtFLA0dCqV6l6H4a7GL5
CAmSoMbd76OFXK0h1OEhuVK7XvFS+1BeQjtecVKrUFTX9lFsZx/Tsm4dFmfrEKao
MG8IW2fFnRlqpV0VCrlaA1ehD9IpF+hyqe7oQpV7dP8wR23led155UrSDYnbHwm6
+rCx0h90FTqaFD1jCkLm25oVcPxZtvohFMo83u9hLUCn/EOlnHGpZuxZS6iZNfIE
7VbFz9oT8snaaYrJ2rvyFdpvFQNI5yJqhsyPrhVbstIerteMWBmta+aEHKHJrAXo
lGkKy5T0rJkvZKV0X8n76nrLmujKyZvovpd10QXJK9jwGbLd0bViS1baw/WaEfMb
65rpzZiyiajPlJNbpqRHzZAbx7G32mpx0lZxzvF8iLClqzP2yGg8EiRISH9IW8VJ
kJB2kLaKk3gkHonHkkfaKk7ikXjc5ZG2ipN4JB53eaSt4iRIcBfSVnESJLgLaas4
CRLchbRVnAQJ7sK5reIQSout4tagP5Xc1yQQ8y9E9oMl1ziQ72XQ72jQYbvMGGI8
QGl+Mo39sKsfp7IYb5qBVxwkkTJoeXTYLjOGGA9Qmp9M87Ti0D5IGbQ8OmyXGUOM
ByjNT6Z5SnFvXnFwEFIGeU63Bha2mEmI8QCl+ck0UBwKZYs3rYAVhzsLKYM8/zAV
f8UpjmWwEtvnr0nK87ziryy3vSN50wR/LDbSUbZgJZ+MsErkIcYjpgyZRq5lI8br
aVjJJyOsEnmI8YgpQ6Z5SnGuZ4eXTMmeHW8qSEqlS0CH7TJjiPEApfnJNE/d57Hi
tGfT8uiwXWYMMR6gND+Z5mnFs2TPDopnyZ4dFM+SPTsojmWAxE6dun+4PfvhPxjo
1hjpeFuwkk9GWCXyEOMRU4ZM81QH5yys5JMRVok8xHjElCHTPKU417PDkz3Zs+Pt
fkmpdAnosF1mDDEeoDQ/meap+zxWnPZsWh4dtsuMIcYDlOYn0zyteJbs2UHxLNmz
g+JZsmcHxbEMkDg796UapDzPK56OPXs4YM8cIx1vC1byyQirRB5iPGLKkGme6uCc
hZV8MsIqkYcYj5gyZJqnFG+iKsc0qtZ9ouKKMfR0I+aO2vZBmwbdThr9Lm42HZqx
vNhluXqNqlxSdI86bZoU/KxLzbGmL+8WSeh67dykjnV3D31xpPSVUz5lByuUCXMH
3CoQ1OO2X5/142dV2N614rTsM+ovOXBkwOU/Hs55eSohouSD2Udi9595mXN/wL3m
rwtFDtm5rek3Zw/3/O3l4ReFHjW+9ij8ze7qlzYc2xhZ/8k/3l0iI/+6bKjaruGY
hTMGVj29quSe0K6bdq05Nafc00fqbFFhAVc/zpFtzdPrd6sltyy1qtfyqLhz4798
/tHRR/Kr/fqM+dXX17di0d9Xe90ZqWmaUOnU1WsHNw/aHtxgf7vwFdH6cFXI5WZX
W+b6OXZ794/25P6u1qjw39dV8F6Zc3m1UU/q1h64WxZbXpVTq772bt+NF+USVgwa
Wcj7v6KDvx/RvNXTw/s3RzW922bNhfbzGtYKLPqRcdT6rr9v7vp87YFGrd5vy/1y
xfp8+seaJT1/uTItX9zaAZvz1m7+fkOvQrnmXr9bRZWCnvR4PWJdvuz76/z2dmfD
358s2P0i9k/D86HlD9ydvultr359t6UsPBL6+uEfYysOjfpjzrtfTs9++Wb2zXr3
ZGvz91/nt9+n6R/RF+LLN9x6ouP9ubo5CVv6Fj224va25p9133Ig+5Ofo1/1ffew
fe3fX+64Ueby1KAvnxS5Xu6v7+sWHNdp4LJr5asFaut4RdfM7vVsa51VRZpnLzF6
2t4VmqASJ0wdRtwb/eBJxzMT8g85sCS6STPUapLi008ged+h4VU7FE0OLpjSdlX3
ysmVB+teH7/uO2tqfe7C4KLJk1tuajkrtPaqIqeK3DgzNueajzeXGB86td4vl89t
2DftUJu2t95V3vCg1rVPFP32X33USDXhQtTVgAUz/219rM+qIr/V3P7Cb6O21NMx
IxrHPHm8v5B/acOfOX07Dn1drvnRb9/3iyodPvzu3B8u/DBvXp6IgYHl0MBsfe7c
73Gl/Lurz/N2r7c1OmJA5aEp3X7QLM5ddVni2ET/yufOBbSs/O/b4tmX+/8ePTX0
v9VjTF1Ob1X9efHyO2XdZrfv1SqzLXvHluP++FQ7Z0z978NevKiSP1l5tkiVS8fP
37hyZeyK9Xmeli/+MuK38N/b59D93iWHflaemDezylWPmLT08KQGL16+bDbtr4lH
v9j6s3p+K8Wc9i2bz/nmwJ/Fhj0MHrOx/Hr1ux0JA+Z0b/owPqnz9N+CA6f/FZwn
7LNDC7ePLhQ/Pm59cvIPK1aNHDT+0I4Gj/8IOyPbs/5cjeo/fp47sewXS5jMP51w
Ms/Tv7vl+KnBp9Fdpk66lRD25pG6zOMaZ4vkup/vdpvmcxMrnd2za9X9SS9qD1xx
3G/g3vnexaIepRxjI79PvHh9V+53V0e8HHzR8FHXswkvKi/cPLN9jhfLt6sHzJsz
t96G1qXrhbevfHDi48sze0Z/GnH4y5zNXg1ZG7ra9FOJkKgJbybN3pHjru+K0GYz
i9fP+aPm9tbdz/ynbNu999Lozr4+G9aXPfHXiDOFX3x+uO39Uk9zXe0y4nrrmITo
7Mbs7EfYcqRmt/Zs0bRCvUZB3MqmPaPiY3rC8qZBPaMSY7sFJcbGxwR17Na7Z68Y
pEEhTP/ZhBlR1ed/aoT7m4GnxO0pywLMADYCgF1ysKsP/ygvptVoAgwK1k4+qBMK
Q+EIlqr0QjoZrGzijaKZgaoPYpe6RfPRGOZvNiQMV0bwa3pgDjNM3DaLMMgl05Yj
bvyH48kRSDQjPczMya2fzoKtQTonZKpj9DcvXAHxAag5gvc2YgUe1IU4hwVRMOKI
c1hBEwMWS8HoRpwvRHcQ96wC74WQEgBYAwxSqlg6WRKxdLJ0YulkicXSSS3E0knN
xNInoSDEaQq2tXXkNHPlYw5Y2KIAc0BcQcRtY1kYwfqalZAt4K3qPzKaw8Zo1oNL
sxJKMjSUz+H9L8d+Trl+OfLU15/++nzQI/5KjFdE+CH7mkAom0Mppg2HiZbBchtQ
i7CR2ya2FJtDOPoUfYaWohqIez8VCXxWoO1IA3iInOyAvpIG8KRdmVaz+4OCthji
S2jYQ1rumw5viWA4zhe4VxstdQDqnCxSa8eynM+XWEnGiXyBm9YB+J2TRebsWJbz
+RJrrjiRL3CTOmA9nJNFwrEsgHP5uteW8OGcrIzZluBwvs4zZlvCvM7JIuFYFsC5
fN1rS8DrfJ1nzLYEvM7XeUZqS9xm4CX5OGHk8fPRQb61kvpHmpgsuLEHuVBdEdTQ
fI6vESjeDBwA4yB7sN4MHMryMdtKcqNZzJjyHaMxF17PhLsQ4Xpes5jRqxC+wYTj
iPC33rOYUawQDvCZxYxkhfBaJtyNDTvYfNzBdvRG5zcfR9Qu7KX5aAxhuAWGVylb
s+fQ3LiGn567sIPhHRjCnOq2Iejt6OldX7KsIbiQgFeRb356cqJBh/ase3GDeFuu
eIV3QQGwYKazsDYEwIEhHLgGIg3Bc9oCZYgylqnUk8k6WepaBDaEM+ZwyRAOWoSF
IeiWgMFlQLcI8uEfkGUNEc5Fm9HK2IzFJrbZc0+nzhvCvXsEwIEhUuMatAEwuAxo
Q8AHOCTcaxHpboj0axGfcdFmZEFDBLKDUAWCiScO3HLL/KD8PVBOoYlVubVJyeE6
F8Lp3HLMLHzxCULc6qwadES2WVNKk+z7VHZOo9F878tNk+Y1MEM+ZL06Ky4rUMif
Ph6z/OkNS6tZLjiN4/1dWowd6yEGvKKtGm2SV9d1VFQwnJV31kUqAgy/yRvpWihK
ZcJdVvMxJYhF9C6rh81cAlaOm1258svbkZuTb6yJmnsvEnZZ5TQF4JzDwsLYA6Bh
LKVkXDOc3WV1FmIfXMxDHOd3WYUJVx5+pBbA6WCXVSgKCBGqFIpsb5dVOjtuJl7g
B8eC77VAD/o7LgDNj8Enm0+ZkkHp2APiiTQ+vMuI2B1VjUZuh1U4x3EAk5Gj7Eec
vEy+Qkx1PLzLqho1VATr3jAu0VNRV3eGcYnWijDd40zpEvmZEnSxcolPRfTPn1L/
1ie/3oq81COkdOC3D0RcAtZPSQ+XAJvzyNguAQag+TF4FvaUN5SFSyy0ufFw5nCJ
2wqFbpqygkGrLK7roQww/KPIrhutzIwuUYApQVcrl5jzznyZGU23TN224+Yt8w9X
1i4Bywmlh0sUEJIztkuAAWh+DJ6FPeUNZeESTBxOY88zm0uYlF10pVQVDEuU43Ua
VYBhnLKPrpAqM7pEEFOCOCuX8BZxiV6r25yu8OR65L5dl/9cFfi3iEvA6lrp4RJB
QnLGdgkwAM2PwbOwp7yhLFyCicNp7Hlmc4ncqmG6FMYlKquW6RYzLlFUNUG3PVO6
REGmBPFWLhH71nyZGdHdvG6snX0jcvjtOSXejb4t4hKwEF16uERBITljuwQYgObH
4FnYU95QFi7BxOE09jyzucR6VZyuvbqC4ZRqoq6SOsCwU9VP11SdGV2iEFOCBCuX
OPbGfJkZ+I0fWfCcSu28xXqJ9HqWKCQkZ2yXyMrPEvXUtXX/Mi7RTR2n+4txiRbq
proHmdIlCjMl6GblEmVFXKLA80SvHqWvRT47dLr2zzXFZpzSq5coLCRnbJfIur2E
Ch2RPdVzE9cBBm7iGihMXGcel3C0rVhxVo+S/OQ/Cdy+XLEv1lkM2L7eqIEyzrej
Ksyvh3Kib6TK4Ddaudz3Y9ULX4TCfTj7yoo5b99wH1kxXkQ6gravu7tVjvPi2rSJ
Ye7B6ol/pOP2roQ3d73gZ5pd+MoQCKGWTWMT42Lo7Ss5DyZ3IOXKRO4Uzr2V7doW
lnCloy0sVeiubLPmqLyCwSA/p1nJ+Az84APU+4Pzm1J2at0V+2KdxSD4zWBZvLaG
/J5+kWySNkieot8m+0mrkq/VM7by4u0blAr7eqGgwUxB7jHXA43XIlRDLlCIX8TE
p/B0EhMfJBcoxG9j4kE+0J+YeJVcoBBvbV/Ob4b7uOo30e85v2nLpIn5Dbyv7gXX
m/CVIWxu5Dcw8PmLKx7kziawzniQN+oh/0YTqSmlnSYfp8mr0WhXy5dofDRPNUQN
E/v4OlHDRlZAukK8hgGu1fB6vobH26jhMmwNF7WoYSaEGsREJQTF9Ose0zM2PiYh
MSouiKtzvsK5750yZrU/1t/UXDHM1Pkb1NpfDIm6EENB7RLDVzqEwlzoEMOYDvEK
M1i5yTQboDOZfB7rBQrxvzDxai1HE5l4f4JC/BKGFuQplCOEoBBvq9rHaVyt9kWI
q/ZtSLxDhM9I4JMqskOEwW+rMnyPGIxAEDfmJTd0hscBeOEBima7kt3tHTkp1sCV
bEBJ8qf6Q0zvCKNJOMbL3+l3yksxBs28+9vDD+jf8NT6AYgDlBY0woD8LPe3h6td
sbs9fNh2B83A7kBdtztcLdmdhCO7M/0Ea3egrtsdrpbsTsKR3YMQZ3egrts9CEl2
t4QjuxdEnN2Bum53uFqyOwlHdi+EOLsDdd3ucLVkdxKO7F4YcXYH6rrd4eq0t3ug
0WQCCaO8hrJlK14tbi6bBUxPJKEghbV6JGzFkwAWzJfaTbwyMs+HCFu6OmOPjMYj
QYKE9Md9kwxx3ZSwQQ8AZlocdg4SJEiwwAPkJxOGsADsRbZ6Omd6Q4lH4pF4Mi+P
0LdCT4v7VlvczuQo8Ug8WY1H8CKGSF4k8Ug8LvAIXiRD0nOeBAmuQPAieL1E8iIJ
ElIPwYvgRWbJiyRISD0EL4K3HyUvkiAh9bhvNBmHmV/+mGU+W4zw+mbcjP4Sdns9
xuGsPpDjwsaqAge8FEK+xcK9JLLL2ER1zpvbzOcQQ7OFIdjMp/XhhJNGv0uNBxeR
dVl6otC7tqjcTdjNZ/aP1brUqDHR9OW1IudP7T0zaUPS8C/zL1VeGl7i2tTTV7I1
nnn4XKfHDxXK0RsTPm4S/WjAr7POPprTbUrT+EGJb7uOS24yK/mcqVHCnrdjb1WN
uf/9uWnFen78Wctjppe9+63b+lvLmBvfjtSuXPhvgZ5zZ82ouqBMzsSK6nPXUsYX
ftXyWbXIcZOPFe03aFrJtv8ofP/bVLj0xNO98hTPMVnVfsY006vi1R/sXnSr7Y5L
VUZduDr6eqIyperlwPgqCzbIimpHfdH2/THtlodbb9cvM7Bm2+e7Nz++tLF/0yv5
Zh3y3Ze30dxPq5f2UwwZUuKnr8o2LlX+/adrqu5P+efna/1nhdbTXD0aOGHj5eG3
V7899/vDgZdybLsfuWB5aMViv2w8eH3y+oOFA/rGfjbuv0pdRo8++sOeXD4dx27Y
G4p2zjDdm/8o5VjhLZ95J5fNn8dUvYUqv3zIviqh7WtN8b14bO6plms3dtQ9v9qn
fGjh2dHdBna8eD/qSuS6GR1OH8mPuu2+8qBif+OmvA9DW33S/02evlHbCm890GNF
QlN9ypgvOz7ruXXu540adR7xdcOdl2pq/tL6nBl1YFO+2KKym1/4z/7navFctZ51
m9is84W/+77fGzIlcNmhiT/92Sz64ax1/brlDvsn8fOeAZMalBrVoGGjXyc2SAw5
1qFweKPOExuEPA/4K/jk31PjFnUcGpB3Vv8Kw+I6/PTz8ohZhztF58in3XjmwB8n
c0fnqLej5qY6y04WnHOn5cJ9n3eafyRoTsu7JVc0uPPz6OPBz84Pj0v64llsh40H
37/+tNX7BSfLrGscUT7X/au32kyrPPdZz/XfDV25vtaOWjs6rxx5pvCLEKPPwMuM
yoo1hy7Nmj8QXUj6beXjk10bvXpzLG9su8Yp9ZP7R9aZGJLfa0ZCt2MRnXa9ja52
6P32MoVPnps+aGWhEXWimsz0D2ZI3okM+axU7agv45esW3pJu7J7pzfarvuf9CC3
m1EwPgGvhjWuWbJ6/7Lm7y6KVSvXpMQn7RK6BdWpH1YdSZvMOIAJzCC+ycxIZYBB
ydrJB41GYagm4r52hk1mIhDeZIa71N4mM/jXSh5BUUYu3jJtOU9xPFQX5ANwZpMZ
QorxC6OwyQzoFMBeLUM9BB6L+ifPe+ITBgvRKMTdZaE05NUAXDoSZDpuZQBsFVvp
IIOUDMBpGJPYD0mgJLjHwEdO9vU/mC0owhzweRJ8nvIxcxRDzm3mgozmsPEKa8pP
2ZwjUDlUnszhxE8c58PVHMUYtcEc1vHrQH/G5lAWVUAVRctgbzOXday3hrE5VEKV
URWUdhunCDnBa5S2QF9JA3jSrkzSZi4cHMtyPl/2wzEejvMFbloH4HdOFpmzY1nO
50u2UMf5Aje9iQjAOVkkHMsCOJeve20JH87JyphtCQ7n6zxjtiXM65wsEo5lAZzL
1722BLzO13nGbEvA63ydZ6S2xC2KHsHHCSOPbCx6sJu5XOGNLnzy4PxmLvZKALBe
FF3YzKUQOsKM74TNVx4z4Z7/381X4AsREll2z5HyXLQZWdYQZbloDGbIvXIFII8R
gnY3XzFOMJqjedCbr9wxy7WGtSEADgxhtG8Ii/0EeE5boAxRwTLVzY0VMvGeIxW5
aDOyrCHop0vLzVe4p0nnDeHePQLgwBAOeg03DFGZizbDvRaR7oZIvxZRhYs2Iwsa
gtt8BX64y8ElofTafGW9bLNmhTK/7ynZOc1I5X/sWlwjldLmK9bAXzSr0X75Ru10
RQXDXfkZbU9FgOGEfJd2TKbcaaIIU4IeiJsc5h2FKdIvtkYTJ1YaWfpwtRGWwsQO
Ig4107q80WhUk10K8zBih/nmIY4aObsUZhGcyBnWbE/gdLAUJvwBIUKVwkWQDzYH
aRbISmHm5MDNUAv88GseOBdQ+pc+AM2PwScDpc9tHLuMiFv2kqd4OUw2joHJiKkg
k7eQ8Ys0XAoTQIcxBJeYqtiujVZWMGxRXNYalQGGhYoUbctMudNEUaYEPa1c4uE7
82WWwLPqk8EluN8+OMBbtSQFgEvI08Al4PcBFqIuIbR2a7Ar/Vu7BDR9bA7SLMCV
3i7xJ7tkPmsofG5xCPGZyyVuqNdr4rQVDCrNKU1tbYDhsXqnpr02M7pEMFOCt+9p
l5j/2nyZJTr8aBzZqu+8s8tXUr0EvIBOUgC4hCINXAJ+LmMh6hJ2ewkojrVLQLOn
f+cDeKKXaM8uhswaCp9bHEJ85nKJcsq62taqCoavlAnaCFWAoYayubZhptxp4mNR
l6hrq5eYv8R4eJ78wISSK6hegvwWAwNcAn63d9cliuJEUZcQWrs12JX+rV0CYuif
xgFA09slFrJL5rOGwucWhxCfuVxiqGqiZrG6gmGpaqNmiDrA8L1qrmZGplxWv5io
S3iJbL4yqdd/z6uuX25kA+/oXgI+SSIpAFxClgYuEYwTRV3Cbi8BxbF2CTj+X72E
id1+izUUPrc4hPjM5BIqdsEwmJKAxcK4KQmgH+Ky+hH8tA4J3L5csS/WWQzYvt7o
qvyUoZ5yv69c8Z/hY+Ui33yK7L6+yjHksvrfOG/fcB/ZN7yIdARtX3cXj36BuDZ9
F4mvIgzvUDm/rD5M1nGLCKffwsGOVodWsVN5sKw+TOV92Mvql7VT667Y1zm/CZDV
1F6Q+RsqyGK1W2SP9U1kQ7ULZWf0SFh0vX0q7OuF2gfIuJW0gdbUInSBoBBfQcat
xA00lonfQlCIb8JQkA90KBO/kKAQb21fd5fVf/WO85tC78UXXYc3B71g0tqErwxh
p7CFd317RsXH9My4K+v/JvtK01VVSHtTZtLUUr3TvJXN1JRW3dIIN8fUrKwf7gNd
bnpDvJIBrlXyjw5W1o9gKzmPRSVDXYpUMv9Wd8asa2k5fcfL6cOLvNJy+uYjYyw/
W4Q5uvPU+sGHA5TW/ISEuDwtl5+Fq12xuz182HaHGRWwO8y/u253uFqyOwlHdod7
DNi9GHLH7nC1ZHcSjuwOLRXsDu3edbvD1ZLdSTiyO7RUsDu0e9ftDlenl929URHF
c42Xcru2tiK39qJihra9oox2n2IIO0ixHiiToG0OBwOjmSHdQNvd3YEyWXPccCkc
wXCJiTNh3hCWI6FUr1KOB8EgCWrc/QGwkKs1cB36IJ2inTaXcrk2VDFM+w9z1FbM
0Z5XdCXrkPAdsiXS9Yetlf6g69DRjMEZUxDifELMk7C7n2XrH0KhCoSGsRagU/6h
Us64VDP2rCUt3u8Gz4cIW7o6Y4+MxiNBgoT0h7R4vwQJaQdp8X6JR+KReCx5pMX7
JR6Jx10eafF+iUficZdHWrxfggR3IS3eL0GCu5AW75cgwV1Ii/dLkOAuPLl4/xp0
Tc69KAf93r8Q2Q8WkuBAvpdBv6NBh+0yY4jxAKX5yTT2He1+nMpivGkGXnGQRMqg
5dFhu8wYYjxAaX4yzVOKe/OKQ/sgZZDneKUNHGZhi5mEGA9Qmp9MA2FQKFu8aQXv
V5ziWAYn8euapDzPK/7Kcil6kjdNsHClkY6yBSv5ZIRVIg8xHjFlyDTyE2YxXk/D
Sj4ZYZXIQ4xHTBkyzVOKN1FV8eE2aSnF0GalEbtJy+8JJ43+8zZv1Mq6LH06uHZQ
crXaIZNCIuqcbFr7+1Gq7Ovqzo2ePXtLnxtb4ncX//W3Ndq9E4KSo6d1a59SdvjW
3OcvnAvvuD3nTysbLjnwpN+ReRVvXwgPr9ukYtiDZtUOvKhXrfi3FXYerPLrT4+m
fn5qXaunlXp9FZWvy/0d+/OvWuvXJE/rdmdGTG38usCWCZuqH2sxXHlRNyzim6Oh
gyo8rbjmwYCoO0VfvMoz69dOn91NLDFwus/ppJFjRvwpm7iyrrH7iMZ9Wy77r/mm
cxee/PHbzqiNrysvKzEuYs7h2qOSZN5T/7q46aPZzy503T3r65Fdw5L1lX6uUbHu
4wBdzPZ3yt8vr90+/br2zdtvv58g/yiqdztZeeOgC4MLf/Od1/UlVwb/2mLfqwVV
Kw7a/9+uj2psO3ju11K9Ki/IfixHp/ILop7vKjtu/d/TLn5x9vm2P3Pc9Vo7ccnA
JBQfnu9l7XHnN8RVzPm68fDD0x/m8Np4vYLhwauIEj82feOT7d2xihXyTh4wf878
f771CsvRqNB45Y+PvjxaZ98YTcdyVb7ZHlF63OqNqNCkfuj5mW0teye3vdVhxO2f
HjzpeqzRtupzX5Y/99epVgM7bn+6+e2saV/0rH6v8vXuZzr3+O/ojC3KAlPav7/5
R8Sb5AYnNbMLyJOuzRy2clUh7+Ubyz1e47svm3LFGJ+OVc+Xa746PqxduW9kjaf9
syRl2eFpNTd8N7Rz+9K7S82trPjlSEKVwd5lI7reCrqvrvROtSJ0drbEQ5vVNY4v
7vVxyoqDjZpnqxXTcuRir24LRhY/fVz1aeSgdz4xJ/59GDuubgfd2EmzYq5OnTRr
adjuTbXPL+keMavhsrCYv27kuhTcr1P5uKSoc8HngisNWPnX5E9WBv/6OOK38N+j
cuhORhyPuHq8UcOdB6c2m9Ku35wrs26uU4+MnfPNnMd3phys8eOq2W92n5cdDfmu
QeiqchGt3uQKCuz3U1wT1Ysj/zzPlv9Zl/XfDe1/9uSmZV0bTf++U6MNH3tpzrze
1P1FaGjpgbm2PSxzRbG9/+38v/48aM7D1nv2evWuUW7O4+uXBpnW/TOxR2yf/xpc
VW2ZX6P2K99Rgblv/liuWeyITbtbR61e17xliRCfLiPe/7r7v7mzW12ttg6kbG88
ZPj9fV2elK5z1ysHuRGMkhlfVWNozV6JsfFRibHdEoIax3VLrBDULKF7VGzPmOig
xKDEmF6JQd06BaV2sxgA3Q9nZYAZ8GYxYBdus5j5ynGahrpKvirWTj6oHwpjDg46
hRcqy4x5ic1igqw3ixnOv91vtVkMDxgzk2n43kzG47hUbhaD2hofmqK9uBE3pIBe
VFsiuLMOsI1w3dgC2A4DTpXMIK0/4n5FYhEkbBXzCFXyEl6hxxfiJyHyiSgrA2xk
C4/hk3+zBSXYB7akpdXsmFcCsmU1yTvtA1tNuMdBBG5r9L0uqwNby+yL3ZcZWWpc
axTanaX1YmsK5xJYMH2rtbeS7U6COMStJnmnfVjf48Bill7KxdWI7dQppmdMQseY
oA4xiX1jYhKC4mOiEnrxLFkCVve4XSN3cSc9iHscbnMcl3GPcC6Bwze7rL2VbHcS
xCFuNekeZx/YavIg+GRbaGPCPIIsqClKHzs+NAob18Jn/AH84g19kTC/ATMr+Bye
s/H5QvQN4koFNU1eIQYyFzGQOYthEls++jk0p/mpP5UbvvJb9JRjNY9ERlTVxRzK
szlUQ9VRDRdzqMDmUBN9jmohYoNXO6BtQwN4MmJO0qazHBzLcj5fYmUHJ/IFbloH
4HdOFpmzY1nO5wulwXCcL3DTm50CnJNFwrEsgHP5uteW8OGcrIzZluBwvs4zZlvC
vM7JIuFYFsC5fN1rS8DrfJ1nzLYEvM7XeUZqS9xmcJFUmrA9oAmJbQ8Ymo6bwTmx
haiD7QFVzmwGB698Iqtd8YxsSACxlyry9K54ThjCnJrmhqjKhgRkWUNUY0MCHO2c
ad81hC1E+QvtwNoQgGDBEEGrjVYGNbvGG9bByXQHJnTgVE7tsGhpwkWsKRTsOfcr
J/DI2PXX3rL83Juf3mw8QFgeDqsLdY85MZeZCRl3IX57Bcf3O4BzXM7dbUmk/grc
vKpT8e5tw5kpdqgV97MabEhAljUE+yMOAfduOMKdNw1uOOibXVYGzbA3HKaw0g1H
AG5en1Px7vmZex07wEEjST8/q8WGBGRBQ3AbIMOEKn6HKb02QG6n8Nas0A/3G6YI
1ozUt/eDV+K+1FX1zaQbIJtLmH4bIKvQREWgb0/dcL+Nikq+DXVgM6Bgsw9tp5lI
vt3h6XLh1QZjOqz+iu0LbTJF2d4X2uRixrbQJoF+eDv5VPu/2Le4Dny+PdNmweeh
7YLPf4j2rfl/sK83GqvaoOqkraJZqzqtqqbNo0lRPVIV13ozN2XzTkmp2Fgl1EvY
3TX9QNvX3bXBkxxsolMWwZOAL/I24StD2O6JeoG5JApCIJArjBcyIKjmdRFgZijG
/29rFW+0Td3Qr6y2SrZL6p5+ObR5sr1Qj/F7rfHOJuyfk5pqDvPJjNVc14urZni3
Xqya4XdR2EiOrGZ4DMAbyQUhsnZh0ENun2O7dt1ZHN652n0vX6p9pCikL6w4qP1d
8U5XUXFVu0FxS+d67cJHWgX1DA9Df2Ly6asQKMQXZuhbHUcPM/RLgkJ8RYbetENt
1e5wH1drN4B34nPvxJ0YfrMWq91WGb52R+o/1/QxDPddoe+iaWJo77tbn6SpYKgN
QzgXb9F9mFvT58wtHuhwJp+ReoFCfBMmvgtP2zPxK/QChfgKTHwST6Ecu/UChXhb
tZt+e1/B+wReUAMmPpqxN9SHrTfkXK/v9LtXkxsKwHc7xRE3cRzHHFHM0VHaXsA5
ng8RtnR1xh4ZjUeCBAnpD2l7AQkS0g7S9gISj8Qj8VjySNsLSDwSj7s80vYCEo/E
4y6PtL2ABAnuQtpeQIIEdyFtLyBBgruQtheQIMFdOLe9gBdKi+0FmqiOe3HLTv/G
0OV+7LLT09vU3WP0H7nseVJShycja140aRurdtboOLZ9cuPfUiYHn0yMq38oeuL+
aVvWVdnu0zdof/jBJeMeLFk+7doe2aGvJr+P/Phy+Trn+q1/m3P4sXrygisnXG8w
s13Ze7cm1oif0qTi5itJijfNrw5XtpidrX/bpK2fPPj1yfO9VcpWrj7r74YJ53bP
jwqtFN3wznef/lzqt79jpuav46Nc81dRrwLvf/preFFl45IrvcotDfnzxYzGm++F
XXtWOPcDZYsknwnFK/4yJvpl+7i2p7rE/2NYMvJ40Z1r6/f9NM8Pn37tl89/9Llh
J1ttO9g+f9E1YYEfTVvU3mdOmfrDCs2b/HelmEkLD7e5GrnxxOFFc26ebz4m74Va
3k3nnRs2Pyrxv7YL988pcnBLcCWvHwo91KsfP9v+5qOYyk1vXU/sELtU83KprG//
YpHRL4c/n11QPfPa9uSCHXr4tNouv3dqWu/z/XcZ5kzfsbbz+s9KTQldMEp5c+Z3
t/r2z9Yk18mAsd/qhp8YkT3boaHDtswe2/XY7WqtX81F55Mf1y4496+dPb825DxX
bPD94XfXHRrUv/yIP7/7O+6HRXVyNWoU8C7pUsuVf8cOmH2p0N8HH61ZcGLKsC4D
Zs//cdnfb01t35X9YtyCXNFXXpArIauYpgCf91TvFt89Ni4mOiihW6mgpj27h5UI
iuqUGNMzqHtM98TY6JggeDm0dxz7eiiyXvQY3rsx8BS3oKwMMANe9Bjswi16/KP8
b61Kc8qgZu3kg/qgMFQRwWt8Xkgngw+MvclFj5H1oscjOLc0c5hh+trIxVumLUfc
Ux+Oh+qCfACpXPTY1MAoLDQEZQpAdRGMhgcKPGgQcf4tcT6YOB9CnJuI84XoAOLu
QTDCJnMF4FJjkJLE0knpYulkicTSyVKKpZscpE9i76ygiXA/tjxymjk+QdzrcfCx
ErxoBw5ZCokviITxOJKjgUYh3IH1xkg299pM7dQjc+jem+Pc+xNHMYxrifADtgsw
sjnUQfVRA9EyOF4QCVo1Qg1RI9QYpd3iQxY5UQ4ggL6SBvCkXZmkBZE4OJblfL7w
gSGG43yBm9YB+J2TRebsWJbz+bJvhfNwnC9w0wvxAJyTRcKxLIBz+brXlvDhnKyM
2ZbgcL7OM2ZbwrzOySLhWBbAuXzda0vA63ydZ8y2BLzO13lGakvcx+G1+Thh5HE7
57EtbW73jjR547GH8NU0QkWY/h8DXyNQ/HE4fBQBYyB7AOkYwvI3T1AhIdpI1jkL
O4swkFf6perKj9mWmQ8lM+PTd4yVufARJjyICA/xSmZGv0I41DuZGQEL4atMeAgR
nuyTjExs2MEH7w6WhzA688E7nwP/wftTi+UhmBzYxoOXh4AFIrgK5ZaHgB9l/c3N
CyqCuQDBqgAQh7/XAS4Bxl340cJxcwM4x+VcYyeR+issbeNnlGwjAK8YAY+AJIg1
sZhiqpSgv6dWjICbggMHMqe67UD00hn1uGgzsqwh6nDRGMzj5Td+fs8XfJXTCEHu
AdNGN2GcYDRH88CLFjkDa0MAHBjCaN8QFmuI8Jy2QBmivmWqDXD9sWDOtIBLhnDQ
IkhDOAC3GJBgiAYWqfT0QWpXlckUy1hxGdCuIYyHODhaxsq+Idy7RwAcGMLBaMMN
QzTios1wr0WkuyHSr0U05qLNyIKG4BZcgh+kcnNJKL0WXFov66sN0RTwOyWbo1Vp
Xvty0/HnDZl0wSVzfPotuKRGO+Tb9AMV/xmuyi/pWyhOGQ7K9+u7KR4a/DLRgjXF
TBMRTLJ7MQ9tsFcj9CBsyZki7bPV7bbva2Tp3qlGHdOg4ecQcQwZMphtvd6oD6qI
oplMk9mQMMSB39isr//E7HRzUXkvrvXDDwEsvC21AE4vu10vywZChCqFEKiJMyIz
hKyEIRgH7hcfgR//Zgx89O/HAJofg08GSp+/Z4zFUp6Nj99lRNygAVNExDEwGTlq
NAoyuaYHv0oVM3KLKQCERVVccQlKAwsILpGgWKIPUf5nmKw4oFcpTxkGKNbpg5SZ
0SWKMyUYZOUS/qL6MwjtZ2TpqOmUS8A72/gAvPZSsC0GfuF01yWK48TUuwQUx9ol
bDVZd10CS7OVP0QzPGypeMo2f8ZY7DmwCfGZyyUKKO/qLzIuUV1pMGxlXKKE8oX+
eKZ0iRJMCb61comO78yXWcKPr4e9EymXgE8Y8AHAvYQsDVwChlgsUu8SUBxrl8CV
TgLS3HUJLM2eSzA8bKl4yroE9BJwDmxCfOZyiWPKxfrxqv8Mz5Qp+i6qU4YLyrX6
JFVmdIkQpgSDrVxi/VvzZZYwjTGydBXdS8DUJz4AuJeQp4FLQD2xSL1LQHGsXQIu
wRmRGbrrEliaPZdgeNhS8ZR1Cegl4BzYhPjM5RJDVaP1ker/DEtVq/V51acM36um
6cPVmdElSjIlGGLlEl62XAK/enNhJuUS8PEbPgC4l1CkgUvAJDCL1LsEFMfaJRSQ
RAHS3HUJLM2eSzA8bKl4yroE9BJwDmxCfOZyiTB1Hd1jxiWaq+N1fzAuUUXdTHcj
U7pEKaYEJiuXaPzGfJkZta8puhUIm2xkA3t/cvJZQpkGLmGewE+9S4g/S8BHDDgj
MkN3XSLrPkuoUDP5egPM0vWXnzJws3RAYZYu87iEc0sk1+ZnOkng9uWKfbHOYsD2
9Ub1lWd8O6jm+3VXvvGtohrgN0rp7xes6uCHUDi/uqosFetvhvvIivEi0hG0fd1d
O7ecg7Vz4RVaeC0b7cJXWq6dC7Xrxd90vHgPNhZIz3U2uZytIfgNzG4flf9ngNnt
lYzPwOw20A9vafE6dmrdFftincUg+I1R9lprkF80RMsK6O7KthoGycrqTsh+gPuS
F2/foFTY14vJminIReZ6oK+1CBnkAoX4aCZ+K08L6BC6S1CIH8RQkA+0LBN/gqAQ
b21fd1clLsavSlzovfiqxEYEnwzkZPoNfGUIhFBD/qOS0vU6BCXGJPaMio/pWaIk
+/UBfO0AsHYjL/anHSVvMvgNjNurQ8y93F222JF7eaMe8nOaKprn2mnyd5o8muPa
1fIArbdmq5ZYlDoV7hVmPWBJB4hXP8C16t/iYGX5qmz1f25R/UxItPqDunfrFZsY
2ydGT31oFBsf3zshdgC3EH2x7kxKr+5xMTEJn2Su9vJYf1NzxTBT529Qa38xJOpC
DAW1Swxf6YT2kppuNozpZq8wLn2TURHoTCafx3qBQvwvTLxay9FEJt6foBC/hKEF
eQrlCCEoxNtqL+m3zDV8JeIFtbSLj2bsDXXWqgzfzwYjEMQNzK1XtVawRUu/Ptf2
2tZcJRtQEjNWPcT0uTBGhWO8fKdhp/whY1Bv79TfFLz5QXf6gq5kYXQ/D5VD3G+Q
A3hq6y4FpQWNMCC/eUFQP7wKVeFqV+xuDx+23eGHLrA7UNftDldLdifhyO7wawrY
HajrdoerJbuTcGR3sAbYHajrdoerJbuTcGR3mBcGuwN13e5wtWR3Eo7szgxbWLsD
dd3ucHV62d0b7VZt0q5Q/6i7pTqrHakeqnuneqJNUMdCAUTmEEjQNofDM6Dt7u5D
Dllz3DC1EoJhKlNnJswbwtZg8eLF6akgsBQ3RMXDUhAEFe7+c4eQqzWEKuykVOur
q47qxyhL6guoVuoXKWvqlaopeuDiq9CYqio0mhnSDelfhZXZKpRZVCFwJJTqVYqu
Q7CL5XRe2tWhkKs1cB36oPrKfvoWqt/03ZVz9eGqufpRyo36vKrhZB0SbkhmRtff
/88NHU3lnTEFIe62JmYMfMc+y9Y/hLozD4ZzWQvQKeEqy5QzLtWMPWsJNbNMlV+3
Xt1Z97uqmm68upruuqq1ro+6uI0bJPmLEl0rtmSlPVyvGbFfxKxr5ndG1WqsBeiU
8WrLlPSrGW/0Rq7Sn1Uc0QcpQvSbFCv05RQ19PMUk7P4fa8Kykz3vWvyvvoHil16
hWKO/iBz5Fds0Ccrhtm478EPMhh0/dlqL2kPug6d9y6y/BjW3qVg2OaI3vcOUinp
4V3kJm7skKdanLRtm3M8HyJs6eqMPTIajwQJEtIf0rZtEiSkHaRt2yQeiUfiseSR
tm2TeCQed3mkbdskHonHXR5p2zYJEtyFtG2bBAnuQtq2TYIEdyFt2yZBgrtwbts2
hNJi27Y1qL8/9y0JfH/5L0T2g8XeOJDvZdDvaNBhu8wYYjxAaX4yjX27rB+nshhv
moFXHCSRMmh5dNguM4YYD1Can0zztOLQPkgZtDw6bJcZQ4wHKM1PpnlacXAQUgYt
jw7bZcYQ4wFK85NpnlYc7iwgA99haHl0WFQpGmI8QGl+Ms3TioM8kJFlFPfmFceL
M+F48py+8bGwxUxCjAcozU+mgeJQKFu8aQWsOF6CB8eT5x+04uSXTwDy/INUHPs4
DIJARpbxcaw4jBJJGbQ8OmyXGUOMByjNT6Z5WnFYnICUQcujw3aZMcR4gNL8ZJqn
FYdvJ0gZtDw6bJcZQ4wHKM1PpnlacXitnZRBy6PDdpkxxHiA0vxkmqcVNyBOTpa7
ucF+DaQMWh4dtsuMIcYDlOYn0zytOHxkQ8qg5dFhu8wYYjxAaX4yzdOKwx7SpAxa
Hh22y4whxgOU5ifTPKW49ytOcSwDJNbpWaMGKc/zI7dXlruCk7zuomidyUXqjB9l
pONtwUo+GWGVyEOMR0wZMo2tcSKe5vU0rOSTEVaJPMR4xJQh0zyl+Bq0X80tqQKD
Vjz9iPdkJ6XSJaDDdpkxxHiA0vxkmqe8HitOezYtjw7bZcYQ4wFK85NpnlY8S04/
guJ4+jFLjeVAcdyf4GhaHh22y4whxgOU5ifTPK04yCNl0PLosF1mDDEeoDQ/meYp
xWHeBxTPetOPrzjFsQxWYvtqH+5YjkV9aSznEFbyyQirRB5iPGLKkGmeUpwby8Ha
AeRYbjCfSkqlS0CH7TJjiPEApfnJNE/d7rDitGfT8uiwXWYMMR6gND+Z5mnFs+RY
DhTPcmM56ERBcXtjOdoNWNhiJiHGA5TmJ9M81rPzitsby33QimfJsRwojmWAxJUr
pn24Yzlu03F+Bx4nYCWfjLBK5CHGI6YMmeapIY2zsJJPRlgl8hDjEVOGTPOU4txY
DhYRxWM5cDATn0pKJc893/g94fW84rRy5DmdxsIWMwkxHqA0P5nmKcVh9GBCWXQs
Z0JZcCyHFbc3lhML22XGEOMBSvOTaZ5W3N5YTixslxlDjAcozU+meVpxe2M5sbBd
ZgwxHqA0P5nmKcVh2GRCggxW4pWXH+5YjsWb+UY6yhas5JMRVok8xHjElCHTPDWk
cRZW8skIq0QeYjxiypBpnlK8iWoJ06ha94mKm8rQDV8x/tX2wVdHG/1p9C+1cK/q
80Lv3k26UzPH4vyfne3XalfRYL/R7ffujf77YcDyqQ9+bNPj9LDH3foVPv5+9+K+
jS7U/6X/p08eet2O73zv2M7+55MSxlaa3GDG34MeNfj15bfhDx7uuj/y74/K6q7v
qbdnZusN55btfZ3S6+S+6RdDclU+GtdotGHDtc9CGl7IWXlsg9cPJvZr1/RcrZHX
Hvg9O9ve71n9snd+2dSk2MxNs7u1OD27y40FPlWH/1Z7eLfP/a7OLXekwfS6N68l
mQI0v2++3vTrlOfbqsoulQtuW7Fixe0bmu9QLBxbofHWHgt215yyul8ffYPgwfsT
D+b58VGbtl9/F15hS8x2Q0rhfvueqnrs1zfLt/Ovp70LJj0ptKRyqPeJnn7Fs2ff
+3bPrgc9jjVVapbmbP9f4++mmIYEaCa96l+9dcy58LwrR1SLiV86Pm9c375ll4/7
yFTj7Kbc2xP2db7x3eeDLo0b0Oz8Gt3jkCU9v3q/9cHaI1v7XKzV6f2jn5O+etx2
9cN85RWj1m6ecKhP7cCiNR+czrPvydj1+YI/3lSlu77lxfVdhpRusTWv4o685f3Q
lq1fakeoT87p3ibHmhYbKm289PhkSe/6y4+jnBvKPiw+/uSawOIvNCMbRFy4p9p4
99S95n/1Hd5y4LXSHV+dvrT/3cTpt7fuSBmkrhp8TX293PGkZdk+37CjbY95xsAp
O7zb19R4H9vaalVI84ASY6ftW6E15Yxd0GHEP+87VpwzsUHtDmWibpwbfnzxfeXR
j5ZGvWl148e4yJ82ply7tXDe4UOdiibPDF0fBtfVZRijizYvd3lD5QFT37aXx467
UuL3uXGPXh7afavjP5Na1g9sNWvCvkMd4IqWq0JOta3NiqsbRV72bn/Zv9o1uvKq
0frKA3yP3urQi7tuLH/d+uwl5h5dNK/B7uCCTKhnfPbD2Ub2bP1szpBPny95Wndq
+Z0Fuj9v2/20T6WVV7v5yvJv7XTgwdjfph19HZ9yt+iW7rXCZA9M9RZ1yL6i5Pxt
sdnH5JI32fdl8q5v/ev1KlCg9P2TUxsfyn3u4rLr1d92aiR/OGyH3/m+L2R+D7fk
amdqc2hDp8Xnc/R7E9IssG22xLoRdb47vid+u9f04Mg1i9C09rN1OUa+fuxTrPzR
EQuPXLoYubBG753rclWf1nJEzQP1w5L/PlBkavLWfxMmVD4TfPxJp25THjyYsO1Q
9hvapg/jF7VtpZmzfN3GiIIM05Ou7WfGJy09PKnB5s2bE6cVPZBr+YXzNXas94/4
Iio2vtrEOsWGtcjR4NxHZ2u8bbP3RkQ2G6nRsbF1WrRKGjT00I4Gf5aoF5Uj5/RT
wbJZw8P6fXZ8CZP5qPOxSYMGR1Rlryl8sMuJ90fVza78sL5OqTMVDyxb1eXE4oPz
NfV/z991wqZlefUbUu7HmlQD2/13BCLb/vjPfDR+dLv527oFxF1O7nS/033FphhZ
3O6+f86TXTzS4Lelrb4usTh308pRtV81Ci8X9lHeHi325byl6TVi6+6votasMxxg
Ailbrmg6dixc/I9GhUaX+ON+vgEvmrZv/SJs3tczd1Q/mr9ii7Kzi9z/adfG+zer
DZz02auykU0LfdQ6JiE6uzE7u4qwmvkHvyNU7xbfPTYuJjqoaFD1Gp9++k0stQVc
r8TY+N5x7A5wzHMqbNLZhBmz1+fH63A/xa9JErfDLAswA9gIAHbJwW7e+aO8uFal
CTRoWDv5oD4ojN1vTcEcOhlsPuuNohHspsddOh+NQdw7eXh4NIJfKB1zmGH62sjF
W6YtR9x4E8eTI55oRjrs3oexy8ifsDVI5wTbDvuzHzhAHKx3HYDqIsh9ssCDphDn
U4nzacT5dOJ8BnG+EB1A3BMwlJjMFYBLjUFKEksnpYulkyUSSydLKZZOllwsfRL7
OShoAvYSO3KaOUojbnPXMswBNRKOuA+6c6FKyBYeR3I00CiEO7De+Dmb+xfoS9SU
z0FzenH3yppsxpXdXkYM6d6UvwKjFRF+yH63WovNoQlqhpqLloG8gg6vY8tQjc2h
BWqJWqGlqAYS37eABG0/GsCTEXNabYIPAkhvFF/T3R6WoyDEtXx7cC5fmEPEcJwv
cK82WuoA1DlZpNaOZTmfL7vxJQ/H+QI3rQPwOyeLzNmxLOfzJbbYcCJf4CZ1wHo4
J4uEY1kA5/J1ry3hwzlZGbMtweF8nWfMtoR5nZNFwrEsgHP5uteWgNf5Os+YbQl4
na/zjNSWippGIhhRcBBGHrdzHtvS5nbvSJM3HnuQO/kUQQ3N5/gagXqb5fqL7rpC
AqRj9GU1hK0On6BCQrSRrHMWkTj1DasFmU5e6ZeqKz9mW2Y+lMyMT98xVubCR5jw
FCI8xCuZGf0K4VDvZGYELISvMuHpRHiyTzIzEobwCFIna5hLNpK33nc8HcVSI1rN
vt8P45pS0AjEwOfA7lqI0FPUCRHb3hi5xiNjdxl6+/4tc85VqDcbDytJ+pubF1QE
cwFqjbir8NfPwCXAuAs/WjhubgDnuJxr7CRSf4WlbfyMkm0EFOVvCl9S8cKjgIkp
pkoJ+nO3Qs6NwlibcihiNJ/ywDcFK5cUgfhNwYEDmVPddqBQ3oGwIZpy0WZkWUM0
4aLNaGXMxuI39tbPPWDa6iY+NZpPecBWac7C2hAAB4ZwcEtFpCF4TlugDNHMMpV6
al4nS12LwIZwxhwuGcJBi7AwBN0SMLgM6BbRnIs2I8saogUXbUYrI/vWV7NNrGtw
MyfOG8K9ewTAgSFS4xq0ATC4DGhDtOSizXCvRaS7IdKvRbTios3IgoYIZB+QYBic
m0tC3Eab/APje6CcQhOrchs5ko+SXAincxtxsoC1C3hwW1lq0GnZFk2IJsr3teyC
RqWp7MtNx+czMI8jyHorS1xWoJA/fTxm+dMbllaz3GoUx/u7tPs41kMMePtPNdoh
P6EbqKhkuCp/oWuhCDQclF/SdVOEGvxQqAs2g0nu9AdpG0Ax00QEk+xezEObF1Nm
6EHYkjNF2icy2q0M8+U7goyzZzFoVd2oYxo0/BwijiFDBrPLH3mjPqgiimYyTWZD
whBHxaRbX/+J2enmovJeXOuHHwJYeFtqAZxedqerWTYQIlQphEBNnBGZIWRFL2TJ
/eIj8ON00IPmBdD8GHwyUPr8PWMslvJsfPwuI0LGqszBUwCOA5iMHDUaBZlc04Nf
pYoZhR12hd16XXEJSgMLCC6RoBivC1FWMkxWrNeplIGGAYrZuiBlZnSJUKYEU6xc
wl9Ef/wLUifArVqUS8BGE/gAvPZSsC0GfuF01yXM9km9S0BxrF3CVpN11yWwNFv5
QzTDw5aKp2zzZ4zFngObEJ+5XKKAsrruIuMS1ZWddVsZlyihbKQ7nildogxTgqlW
LtHxnfkyMzhXqMy7RH3KJWDfFXwAcC8hSwOXgJ+JWaTeJaA41i6BK50EpLnrElia
PZdgeNhS8ZR1Cegl4BzYhPjM5RLHlBrdeFUlwzNlKV0XVaDhgjJAl6TKjC4RxpRg
mpVLrH9rvsyMw38A6vIDp8aUS8DUJz4AuJeQp4FLmN9jSb1LQHGsXQIuwRmRGbrr
EliaPZdgeNhS8ZR1Cegl4BzYhPjM5RJDVY10kepKhqWqXrq86kDD96o2unB1ZnSJ
cKYE061cwkvEJbjeoTrnErnpXgJ27MIHAPcSijRwCXiJiEXqXQKKY+0SCkiiAGnu
ugSWZs8lGB62VDxlXQJ6CTgHNiE+c7lEmHqC9jHjEs3VG7R/MC5RRT1HeyNTusSn
TAlmWLlE4zfmy8wIB2xoYn4bzblnCWUauAS8U8ci9S4h/iyBF7omAWnuukTWfZZQ
oWbyZ3qYpesvDzRws3RAYZYu87gEN08p1CqUBEJc6zFWLc7q8QU/00kCty9X7It1
FgO2rzeqrwz07aC65NtdWcm3imqb7yhlU99g1SJfZhDlw9lXVsx5+4b5yIrxItIR
tH2FdmjbguRMKU7zR6VZDct5cW0aXtHuweqJbw0lTNkR9wotvJaNduErQ9jur2XT
2MS4mJJs7XrxNx0v3oONBWCO+YYMfifkyiRjblcK1JU5i2eOBOYoYXSlXuFKLmdr
CH4Ds9tH5ZUMMLu9kvEZmN0G6v3B+U0TO7Xuin2xzmIQ/Kar7I62jDxRP0Gm0+nl
jfXLZEV0z2Xl9IytvHj7BqXCvl4oqCtTkETmeqB3tEyrlgsU4icw8Y15qtMhpJcL
FOKXMfEgH2gRJv45QSHe2r6c3wz3cdVv6r/n/OZzJk3Mb+DFcS/oFU34yhC2j+S+
KSnhiuPcSWfH8Ua15Hk0nTWfabvKq2iqa7Jph8mba0po/tUwIxX+hpgaxwm3Hoqk
A8QrFuBaxW7hK3a8jYqtjeBbkBoWFcuEUOOYnh1jEhK56qW+GIqNj++dEDuA/WRI
X6xpz+5hpet1CEqMSewZFQ9s3XrFJsb2ifmkJPv0Dl+9AKxbhRd7M1LyFobJL2hS
/6/W8lh/U3PFMFPnb1BrfzEk6kIMBbVLDF/pXO8+rzBDm5tMawM6k8nnsV6gEP8L
E6/WcjSRifcnKMQvYWhBnkI5QggK8bZayziNq61lEeJayzYk3n3C1x/sbWAXH83f
BlqV4fvPYASCuAG3F/uSpRpdKQXmBfEKtmi2bwnu9qWcFGvgSjagJGYMeojpS2Hs
Ccd4OTLslIcyBvX2Tv0twZsfTKcv6EoWRu3zUDnE/bY4iae27lFQWtAIA/KbFwT1
w6tQFa52xe728GHbHW5eYHegrtsdrpbsTsKR3aGjALsDdd3ucLVkdxKO7A6dOdid
69TF4djucLVkdxKO7A7zvWB3oK7bHa6W7E7Ckd1h6AN2B+q63eHq9LK7N1qoeqFZ
rb6t3avKox2t3q29oArT9lCvYAeH1nYnQdscDs+Atru7jzhkzXHD1OoIhqlMnAnz
hrAcxRnQj6rCGBWPS0ES1Lj7Dx5CrtYQ6jBO2VVbR1VGN1E5QVtUpdctVy7T6lXP
yTo0pqoOjWaGdEP612ENG3WYUKpXKboOwS6W0w1pV4dCrtbAdeiDmijPab9WFdb1
Ub7Tlle9045XBugKqm7Z8EPuMZcDXX//Pz90NEd3xhSEuPsaWX4MfMs+y9Y/hPow
bO9YC9Ap5VWWKWdcqhl71hK8y1txSXtZsUQXrPDWbVeYdFUUeXSLFd+A22dh76qJ
MpN33ZE30P2jmK7TKXrojjJHEcVo3c+KVmQdEt5F1iNdf7baS9qDrkPnvYtuhwBr
79IpEOrBWoBOOUqlpJ93+TDjj9balerFzPhjsPY79WBm/DFd203dycZ9j/w1lK4V
W7LSHq7XDP1rLsC6ZvYyqg4Wve+NVFumpEfNBBpNJpA1ymso68HFq8XNZbOAwieh
IIW1AUjYiicBLJgPfqg2mUzs60/wHgeEgd65c8f8S39m4fkQYUtXZ+yR0XgkSJCQ
/rhvkiGuw3qAjD5CZwNTGQ47BwkSJFjgAfKTWQ7bsBfZ6umc6Q0lHolH4sm8PELf
Cj0t7lttcTuTo8Qj8WQ1HsGLGCJ5kcQj8bjAI3iRDEnPeRIkuALBi+AFWMmLJEhI
PQQvgg+zJC+SICH1ELwIXtaRvEiChNTjvtFkHGZ+dWqW+WwxwotTcjP6S9gdfxiH
s3pFhAsbqwoc8CIMfmkEwL3us8u4Bn2XnfuIJwfidouGLTwn81zkexn0Oxp02C4z
hhgPUJqfTGO/6/LAvqJYcZBEyqDl0WG7zBhiPEBpfjLN04pD+yBl0PLosF1mDDEe
oDQ/meZpxcFBQAZ2NFoeHRZVioYYD1Can0zztOKgMCmDlkeH7TJjiPEApfnJNE8r
DvJIGbQ8OmyXGUOMByjNT6Z5WnG86hKOpuXRYbvMGGI8QGl+Ms3TiuO1dbKcj5Of
PgFoeXTYLjOGGA9Qmp9M87TiMAgiZdDy6LBdZgwxHqA0P5nmacVhlEjKoOXRYbvM
GGI8QGl+Ms3TisNLzqQMWh4dtsuMIcYDlOYn0zytOLx3DzKyzM3Nm1cclqUhZZDn
dB/PwhYzCTEeoDQ/mQbCoFC2eNMKWHEDEi8n4INWHDZiIGWQ5x+m4q84xbEMkHgk
ckFVUp7nFX9lufkzyesucrc/sv7f2+FGOt4WrOSTEVaJPMR4xJQh09ibGxFP83oa
VvLJCKtEHmI8YsqQaZ5SnJuMgrVJyMkovDU3KZUuAR22y4whxgOU5ifTPNXBYcVB
EimDlkeH7TJjiPEApfnJNE8rniUno0DxLDkZBYpnyckoUJzuvWl5dNguM4YYD1Ca
n0zztOJZcjIKFM+Sk1GgeJacjALFs+RkFCieJSejQPEsORkFimfJyShQ3N5kFD2O
Z2GLmYQYD1Can0wDxT0yNcErbm8y6oNW3N5k1Iep+CtOcSwDJOY5+aPFZJTnFX+V
fpNRPacfjux4znojcVuwkk9GWCXyEOMRU4ZMY29uRDzN62lYyScjrBJ5iPGIKUOm
eUrxNWi/mlvuFYYweDJqKp9KSqVLQIftMmOI8QCl+ck0T3VwWHHas2l5dNguM4YY
D1Can0zztOJZcjIKFM+Sk1GgeJacjALFQR4pg5ZHh+0yY4jxAKX5yTRPKQ7DJlDc
3mQUfeNjYYuZhBgPUJqfTPPkWA4UxzJA4i/bK1Uj5Xle8XQcy/Xry2BGLSMdbwtW
8skIq0QeYjxiypBpnhrSOAsr+WSEVSIPMR4xZcg0TynOjeXCkOVYbhqfSkqlS0CH
7TJjiPEApfnJNE/d7rDitGfT8uiwXWYMMR6gND+Z5mnFs+RYDhTPcmM56ERBcXtj
OdoNWNhiJiHGA5TmJ9M81rPzitsby33QimfJsRwojmWAxGbN4j7csdzKFQzGNDDS
8bZgJZ+MsErkIcYjpgyZ5qkhjbOwkk9GWCXyEOMRU4ZM85Ti3FgOvi3GYzlwsBl8
KimVPPd84/eE1/OK08qR53QaC1vMJMR4gNL8ZJqnFIfRAyieJcdyoHiWG8thxe2N
5cTCdpkxxHiA0vxkmqcVtzeWEwvbZcYQ4wFK85Npnlbc3lhOLGyXGUOMByjNT6Z5
SnEYNoHiWAZIHD1q3oc7lssGSP7SSMfbgpV8MsIqkYcYj5gyZJqnhjTOwko+GWGV
yEOMR0wZMs1TijdRHWQaVes+UXFbGbrgG8a/2j746mjXP43+81uXXJRz7K9DktrW
qLFDpRk7I/7eimMdknM+39igb8e8ecvWizh1atiLyMf3Dw97P6LWo6Rjc64MCer3
svHtB3/sj316q+gXZ5a8Cpge1+7WwPB/L708XH9zdOfTHw1Z4Hft4hi/kysf7i/4
77/vLlz8b9vprqf2HDs7c7q+082B9edvCW5zauCle1/8uzVhr+/4H69PfHY8/7Rn
B4L+/mX7VyvLP+hzY1PzgZ1uLShcfM/8GiMfVYspV2pCry+//3zDzqAfNp0LP/qy
zdACw4cVyV76xaGXp06derHqfKzPnan6P+9fWtL94JHp1dd+3ye4XY7NR7Y19N8a
lTIyx7cXwtf6pLx/POZ5tqcf5fyxQqG+ldcvbXy9Zu3tRf1jc9aeVlt97V3B7gPf
dG3xV/19siVFB1f7ZuUF/byHdVdv3rjtwm/6zTt2rB63SLnwi7YD99/b8nfufzfX
PjqnztrW1/ejCVVbDPar/GLRtK277tU4cP/985F3tVXm/LWj7JprEy+Pa3eqxxbd
lHaBPvsrpvz9auCO2W39F9Zb3vzXJt/n+mJ1xN/Dp/z2X7Tf5ot+f+X8RbFv5OiK
s9ofPLh/3p4ep6Yd3Dt/37p/Rw70Gro5qWFKfM2dn9YMfqcbOST3mrf5Tuj3BA38
Y1m26FLzQ8f3KrkqIOpZRNsQ+c7s+5s2915Vu7jXxbJjp+071CEmeX3LePW6Qskt
W62KCNr/JMG/xNyj4z6esC3f5Ta60kemaBoVLxKQ4/NWUzQMe90OZaLWMYytageU
gGBUmaipRZuXW5C7Uf7eFbd89824qy8DZiS+MWVrdHO1ce7hQ52KJs8MPRTG8nYg
eVtW3aZ8Mi2mYcp3O9av+/fMIFbErY5MWeqEBOuYzD/THmSL9klI8Lj1ezW3w68f
XJygHPhgpfflYRPulXvW4OqvD1KeLEistPW7zr2St9YGtj/2MZdMblk/MGZ0ziMz
snWesq4OxNeds7fn8B8+mv7g1qP6kS0HlPp97uAXnW9uO/ccHe30X4nChwrfHjG4
aZ2v/x208er2VkljF1QZvuTb7tWb16++el94gYlJ14oObfqkfkj3BXtPXFiWUrHw
g4U/TA1f1Wh2vnz5IgYGPy59Zmxy9c6NvKNS3t74ZMvS8vcSlSWHphxtPeJJzqqL
B01JnFt5cI1GUbFPTxZvsvyjk9EXot78sTpp8j9f6e5GLnupnLryyMd9OyzPPmed
bFb/4Ii8s4aHXdr57YY9+eOm3Oj3+88Hv/MtED+t6IEZyw+d3/vLeu+IMlE146tN
rFPs+ukDgedl9zZXizh74cLGZtOD2i0q3i3HP4c0Z/YOz7lJXTX4B13bBiEXmx8I
vvVo/I2fR9dodin41rSc60arS3TJkVS/Wu5fZrfctnpig4BcuUTzH9YiR72fc65X
J88LPnB7YI4/g2VMyZ6uCt7zfv4x2cPic5om7Rjy7/S/7j97H31UFhAzYVPKuQ3f
jzzb8UWIcfiO0tU7Q+TaP/s38v74RgHfYS20bW9sD29belPVr3ONafCqQO9fh1W9
Pv/GidjVEcfz168cVftVszof5Z7w/ZlmPUZs3f1V1JrQFjNLxPn0ZAKflNqy+8yZ
UZp/5tV+qAkfuH1+5Rwtp+5o0nlG3XUgMth3YPC6YgNXVc6xpcTZeqt++9XrpxtJ
hVvHJERnN2Znd0HSIDUqydDq3eK7x8bFRAcVDapeI6L8N7HUlva9EmPje8exO9oH
MReFML16E2ZkX58f1cNd14CMNu/sWQ1gBrARAOySg/1U7Ed5ca1KE2jQsnbyQX1Q
GKrIDJAUzKFjLNmIeUqMZh6YfNhBE0Lz0RjmbzYkDKJG8HufYQ4zTF8buXjLtOWI
e4Mfx5PjomhGOvzOhLHLyJ+wNUjnhEwNjP7sS/EQl4s5AlBdBGPenwQetII4X0mc
ryLOVxPna4jzhegA4p6TYRxN5grApcYgJYmlk9LF0skSiaWTpRRLJ0sulj6JXc8K
NAF7iR05zRyfMUcEc5RlDthYtzxzVEBg5UrIFh5HcjTQKIQ7sN7YgM29NfoKfc3n
UFlzenH3yt7G2bMY5K7LX4HRkAg/ZBfeasjm0Aa1Re1Ey9DKaDu8ji1DHTaH9igK
dUBLUQ3EPRTaA20/GsCTEXNabYKXyElvFN+Uzh6WoyDEtXx7cC5fmGnEcJwvcK82
WuoA1DlZpNaOZTmfL7EDoBP5AjetA/A7J4vM2bEs5/OF0mA4zhe4SR2wHs7JIuFY
FsC5fN1rS/hwTlbGbEtwOF/nGbMtYV7nZJFwLAvgXL7utSXgdb7OM2ZbAl7n6zwj
taWippEIRhQchJHH7ZzHtrS53TvS5I3HHuTmvEWYcQQGvkag3ma5/uwYyB5AOkZf
VkN4ZHmCCgnRRrLOWUTi1DesFmQ6eaVfqq78mG2Z+VAyY+13jJW58BEmvIIID/FK
Zka/QjjUO5kZAQvhq0x4NRGe7JPMjIQhPILUyRrmko3krfcdT0ex1MjkWgJx45pS
0AjEwOdQtRRLnqJOiBuEsjByjUfGbmD99v1b5pyrUG82HrbC8Dc3L6gI5gK2YUAc
/mIWuAQYd+FHC8fNDeAcl3ONnUTqr7C0jZ9Rso2AovxN4SsqXngUMDHFVCm5mwbc
Cjk3CmNtyqGI0XzKA98UrFxSBOI3BQcOZE5124FCeQfChviaizYjyxqiDRdtRkPj
QP81ta4O2Mje+rkHTFvdhPXHa15OmYCDtSEADgzh4JYK0xVmQ/CctkAZoq1lKvXU
vE6WuhaBDeGMOVwyhIMWYWEIuiVgcBnQLaIdF21GljVEey7ajFbGZiw2sa7BzZw4
bwj37hEAB4ZIjWvQBsDgMqANEcVFm+Fei0h3Q6Rfi+jARZuRBQ0RyD4ggYq5uSRG
iD8yPzC+B8opNLFqYZRHSOFBphdE7OAMAN+78wgy5UfA90a2RROiifINkl/QqDSV
fbnp+HwG5nEEDecVOI9mI8u1X4BC/vTxmOVPb1haDSFOQz+LeH/UDwWar7CG+OgO
6yGGICNnMzXaIa+nG6ioZLgq76ZroQg0HJS30HVThBr8UKgLNoMfQdIfpG0AxUwT
EUyyezGW8GLKDD0IW3KmSPvMXALCWXxs5EJVjTqmQcPPIeIYMmQwu2SON+qDKqJo
JtNkNiQMcVRMuvX1n5idbi4q78W1fvghgIW3pRbA6WV3upplAyFClUII1MQZkRlC
VpZuhH/xEfjxTh2gB71rB4Dmx+CTgdLn7xljsZRn4+N3GREyVmUOngJwHMBk5KjR
KMjkmh78KlXMGGo2ZRnzmSsuQWlgAcElEhTfaEOUlQyTFeO0KmWgYYAiURukzIwu
EcGUYIWVS/iL6P/r9eO36owoZv4FydIlYKdMfABeeynYFgO/cLrrEvC7GIvUuwQU
x9olbDVZd10CS7OVP0QzPGypeMo2f8ZY7DmwCfGZyyUKKHvoLzIuUV05Tb+VcYkS
ym/1xzOlS5RlSrDSyiU6vjNfZkaTLflH3PvC38iFilIuARvH4gOAewlZGrgE/EzM
IvUuAcWxdglc6SQgzV2XwNLsuQTDw5aKp6xLQC8B58AmxGculzimzKcfr6pkeKas
qu+iCjRcUH6iT1JlRpcox5RglZVLrH9rvsyMTiw+MnIDqDKUS8DUJz4AuJeQp4FL
wFsTLFLvElAca5eAS3BGZIbuugSWZs8lGB62VDxlXQJ6CTgHNiE+c7nEUNVwfaS6
kmGpark+rzrQ8L1qoj5cnRldojxTgtVWLuEl4hLsgGmW3vii2FcTdj8vSLkEbDmO
DwDuJRRp4BLwEhGL1LsEFMfaJRSQRAHS3HUJLM2eSzA8bKl4yroE9BJwDmxCfOZy
iTD1T/rHjEs0Vx/W/8G4RBX1Jv2NTOkSFZgSrLFyicZvzJeZgd9GY38V8A908llC
mQYuUQEnpt4lxJ8l8OLIJCDNXZfIus8SKtRM/kwPs3T95YEGbpYOKMzSZR6X4OYp
hVqFkkCIaz3GqsVZPVrzM50kcPtyxb5YZzFg+3qj+spA3w6qS77dlZV8q6i2+Y5S
NvUNVi3yRSjMh7OvrJjz9g3zkRXjRaQjaPsK7dC2BcmZUpzmj0qzGpbz4to0vKLd
g9UTPtIGlDBlR9wrtPBaNtqFrwxhu7+WTWMT42JKsrXrxd90vHgPNhYAn78hg98J
uTLJmNuVAnVlzuKZI4E5ShhdqVe4ksvZGoLfwOz2UXklA8xur2R8Bma3gXp/cH7T
xk6tu2JfrLMYBL+ZILujbSZP1G+Q6XRl5I31v8uK6HLLy+kZW3nx9g1KhX29UNAE
piCJzPVA72gRc+cTKMRvYOIb81SnY1q9XKAQ/zsTD/KBFmHic8sFCvHW9uX8ZriP
q37T5z3nN92ZNDG/gRfHvaBXNOErQ9g+kvuopIQrjnMnnR3HG9WSn1B31pTTdpW/
UFfX+GuHyQ2aEpo3GuGGmBrHCbMeiqQDxCsW4FrFbuErdryNim2E4FuQmhYVy4RQ
45ieHWMSErnqpT4Zio2P750QO4D9ZkhfrGnP7mGl63UISoxJ7BkVD2zdesUmxvaJ
+URfkv0MBT57AVg3Cy/2bqTkTQzL3EKb+n81l8f6m5orhpk6f4Na+4shURdiKKhd
YvhK53r/eYUZ29xkmhvQmUw+j/UChfhfmHi1lqOJTLw/QSF+CUML8hTKEUJQiLfV
XMZpXG0uixDXXLYh8f4TPv9g7wO7+Gj+PtCqDN+BBiMQxI24vdi3LNXoSikwL4hX
sEWzfU9wtzPlpFgDV7IBJTGD0ENMZwqDTzjGy5FhpzyUMai3d+rvCd78aDp9QVey
MGyfx86PwY+Ly3lq6yYFpQWNMCC/eUFQP7wKVeFqV+xuDx+23eEXLLA7UNftDldL
difhyO7wMwnYHajrdoerJbuTcGR3OMDuQF23O1wt2Z2EI7vDhC/YHajrdoerJbuT
cGT3CoizO1DX7Q5Xp5fdvVF3ZXVdA5VaP1XZWfeJ6qZulXKILpvqMBQATw4YBbuT
oG0OBwOjmSHdQNvd3Wccsua4YWpdBMNUJs6EeUNYjoRSvUo5flYFSVDj7j94CLla
A9ehD2quXK+LUr3WDVCe0lVWndJNVj7UFVXtJOuQ8B1y+pmuP2yt9Addh44meM6Y
ghDnE/T0OQC7+1m2/iE0gHmqOMVagE6prLJMOeNSzdizluBdBsVc7T1FB12YYpc2
RVFFV1dxRrtWEayDa1PvXV4fiHfVQ5nJu57Jtbr3iqa6QEVp3XnmCFXU0u1R5CLr
kPAu9qmah0j9mS2WvqDr0HnvIsuPYe1dgQqESot613kqJT29a5vqgm6GepH+kgrp
e6kH61+oAvVt1J3YCc7Uexf6QLyrPspM3rVE9YV+rXq2/oCqt36surf+iup7pi6/
JuuQ8C6iYVnVn632kvag69B57yLLj2HtXSmMqr1ZC9ApY9WWKenhXYFGkwlkjfIa
yraT4tXi5rJZgEpJKEhhbQAStuJJAAvmg1+qTSYT+/4TvMgBYaB37twx/9SfWXg+
RNjS1Rl7ZDQeCRIkpD/um2SI67AeIKOP0NnAb0EOOwcJEiRY4AHyk1kO27AX2erp
nOkNJR6JR+LJvDxC3wo9Le5bbXE7k6PEI/FkNR7BixgieZHEI/G4wCN4kQxJz3kS
JLgCwYvgBVjJiyRISD0EL4IvsyQvkiAh9RC8CL7PkLxIgoTU477RZBxmfkFnlvls
MfsaozCjv4Td8odxOOI1Eg5c2FhV4IAXYfBLIwDu5aZdxjVori/3MQm8xAObSsNO
nyt4LvK9DPodDTpslxlDjAcozU+msd91eWD7Uaw4SCJl0PLosF1mDDEeoDQ/meZp
xaF9kDJoeXTYLjOGGA9Qmp9M85TisGM3KA4OQsogz+nWwMIWMwkxHqA0P5kGinti
G3GsONxZSBnk+QetOMgjZZDnH6Ti2Mfxsks4mpZHh+0yY4jxAKX5yTRP+ThWHC+u
g6NpeXTYLjOGGA9Qmp9M87Ti5KdPAFoeHbbLjCHGA5TmJ9M8rTgMgkgZtDw6bJcZ
Q4wHKM1PpnlacRglkjJoeXTYLjOGGA9Qmp9M87Ti8B0CKYOWR4ftMmOI8QCl+ck0
TysOr4iTMmh5dNguM4YYD1Can0zzlOLerzjFsQyQePHA6qqkPM/3468st8Qled3F
pLxbmf+fGf/H3pWAN1V07UmbBFraUqiWtXxXEGhtQ7M0SwuUUlooS4FC2TdDk7aB
NCltWqisIrKILP4gAgqIokUEZV8+VGQHZRWQXUE+RFkEFGUR5JuZe9PcZW5yH//f
8vw053lgMuecec+cM2fmTtK59/L5YiSwz2YIhAyRdEjOsGV4xFl8vm5lk8A+myEQ
MkTSITnDllWW45+APUH0YwfQuu7+hv4xI2Vb5feAX/eq7CaSDir5+mxZZc16t+P8
mc23x697VXYTSQeVfH22rLIdr3Lf0N2Ou7+hu38K49vj14lO8Ymkg0q+PltW2Y57
+4ZOqntVdhNJB5V8fbassh1H9tg2+Pb4da/KbiLpoJKvz5ZVluPoVwDkuLdv6PyF
D5OYMptIOqjk67NleEtTGY7fox1320AW3z0W8PTu5c6mlIe6+lMpfL4YCeyzGQIh
QyQdkjNsWWVtaaSSwD6bIRAyRNIhOcOWVZbj9F4OPeaFvZdbyUjZVvk94Ne9KruJ
pINKvj5bVlnLndtx/szm2+PXvSq7iaSDSr4+W1bZjlfJvRxyvMrt5dBFFDnubS/H
nwaYxJTZRNJBJV+fLau0KzvjuLe93FPteJXcyyHH3TaQxbbl6U/vXm7Dy10b/LQ+
OoXPFyOBfTZDIGSIpENyhi2rrC2NVBLYZzMEQoZIOiRn2LLKcpzey6EH7bH3cp8w
UrZVfg/4da/KbiLpoJKvz5ZV1gXO7Th/ZvPt8eteld1E0kElX58tq2zHq+ReDjle
JfdyyPEquZdDjle5vZw71b3t5Uh1r8puIumgkq/PllVaqt+jHXfbQBa/Oz82hW2v
8kf8H9zLbcVUM4XPFyOBfTZDIGSIpENyhi2rrC2NVBLYZzMEQoZIOiRn2LLKcrxH
9XKYVP1Lzfa3YNlyIJxfg28MzHRGdAxfFD41/F8Bqu/jMgpPvzlvVpOMyDpTXpyU
lpaWMmH9/+jWTLHs25Uzo1qGKeUvpTHsYY2Z5xIvT570R01qxJXwf5+7sVTbc9Di
oNitWS/0SOidue3qL31ulsy60TV3yL2jyYd/a/HoWpkudvsD8+8PDp278aD/qeHf
ztk1ZElWaO6Jm3P/PSJ9w8q7O/rMuVoStbtm18hLs+9cbLTozqy239x/8aPev529
kWBfdafwR2dE0s7FAyfHLz5UmDroisNQ/+CDQMWqE4snZx1/7X1TveezRjk/fXD+
3LlzC0OTCsCijS8vPD+8YYvvT/eovXH/oeOHswbkDWqT+cqynJ1lY88dWx14cpAp
p/jVVntbrZyZ0LdzQcydUUHffDJ6YUK1Hpd7TNy87aX1rcdtiDX2DJKlT1ty5/Ve
jubjRm7pPWBgv6tHlGfPnPmmvSZQvXz1WON1+e5n70/uM9D42+ANe46CWe36ZL2T
HHzs8hbT9WW7rm57sOmXGoMvXR1syJnw0DRu366lO1vFbI5KWHbrcdTx2+9Hh/3+
cmL3ko/rjx9eWj690fF6ud8vKcvRrzrx4SNL0uC3Z84pnT27ZOISWdnq8B8j4h7s
HHEl/52SD/aeahNj33JxMPXuqs3HgvrblqUZnhk/b0ebboOvh9R7vmOrMQfyqlti
FkfP7FyQHWm+822fOpcyalz6cbU8+w1XwBfOWh9P7bXrhaHPrjlTu3v6maV9L/51
M7xOz2kf9Y1rGlKe+ea2haW3rn8//73vIx5af6jW/bPZJ1/ePL/Xga+Gxphf/3pl
4961Yqd/MEnTYs2OR0tvPzyx/pWoZcOTe038onDMoV0dPl839f6uMXHzau/ZfKA5
tLC2b6e6sMU19TJs8vLqueo9TXtvbpOwGFp5vNe4Z8ndY/dqNmtx+NbQwQ2KTr7d
BypZ19BK3Xan72o8NLJz0E59Lef0AZ+o5zZZcf7hqgWjpx/OXjD9yq/zPr1a3uhC
vfLHeamj//NZ3sxaVxccLr+Wpe5SeHr/ixlnqhmzd4cc799qzKhar71VrWj3zr4X
kmdd3hI/s86hzvWjr4RcizmSM+f93JqBI78cPDkqcXRw9W7nZi2ZMGDhunEjj9Qe
9TA/e/7B6vXfHLBs3fXTt/vNuLw/fkXG+53i5vSbcrpsVKj15JaQ423a/RmRveJQ
+caczbVz+s48oK3x9owu7es5v/vsu9yaazqO++zSpv1bR94seNO6r0/0lYKJeb23
N6vb+0SzkAWva7/o1mVa5nJH1Nr9e/ZMXrU25H7w5c8ybx144ZR854ozk56bkzX5
erN5UBz019tf/mrI4je3GNe4rs3OjIyMtJPQGfH8vbbJY8qcqRiw/YLzljtLIoZe
cFojmp/6881u/UaUb53TOmTlV4vzu63PazBjdfPr/SbIRy9pf6iRsrfVufLa4oAd
48GWf20bE/5hVqHx+rONup9sdbDZmA7nb754ZHP55jsDYjPXVlvZPDjo8e1X2+fm
5CxesWxHD/NHq7P7vhD37EbZBzt6XAyo08M8zN7l1cuLMn4ObrmdBv6rcGLro4sL
Eqyndn654vq0P9JGbzw611wz8OO1Vyb9UTT6Vs27BwKn97c6LLVT9PhZm+iEIzrj
2MVc5ixxURr4PRS9gY5E/9S6+f+NUBzYMTLgXZ0M8cEGfAcMP4BGMBSgM7T0Rofm
0fsP+jO9K6Q/0wdO6c/0N0L6M71lpj/Tp3Hpz/Q5Tfpz3QnoDB+y4n7sMP1oX6SD
CJV032a3pR8d65YI5fSjfzHVdH8AgH54bg1QS1ZLdlneR66XWWXb5YHyTFmm7CN5
A+RUivDhuWxC+Px/IIWl8I8R/9ov5QHI9COODypOy+mHHstAHC37zhMeFv3fPxPX
E/CHynOKF2voZd2rbVaE1MiUmaq9q3geHVZ9CgPeWrlcQQdc/uQCfiWkqXxmuF7W
MlQmTwrPlDUJ/TmwB+rEUxjwXYHzmQxXPrmAH61drvggUi9rGvGKIisyUxYaMVxh
iwRPZcBvK84wAQ96UgG/H1RL9l5IX3lUsFU2LkQu1wdnynJDGj6la/i+QPcaHvDk
Av5QOSusTY2o4O7VhoddC9YHm6r1DAt8Stfw24oyZg1XPLmAXwlZFbY1PCq4Zei0
sLxwfXCT0BFh45/SNbyh8hST4dWfXMCP1i4N+yAyKrhpRI+wrEh9cGhEUhhaw2V/
I+CyFLbGP0V/P+AHK9bw4MoOeN2U8bgF0vC8NAHrc1+U4Cc/+clPfvITm3y9KIGv
7yc/+UmcyC9K4Gv5yU9+qjpEflECX8tPfvKTOJFflMDX8pOf/CRO5Bcl8LX85Cc/
iRP5RQl8LT/5yU/iRH5RAl/LT37ykziRX5TA1/KTn/wkTuhFCZ7XI/SsfgPQN/Gc
h+WIYHwTz+yjwRPVz0xunp1tPK/I+jxl1oVF1tI5z9wD2pJ5Wz48UOvUumolvQe4
nnvp9MFJa4p/vH9v0+Ft5jMdql/UpDq6Xo05vnfGlVdbzvx6XUGH+9Oajmhb45cd
y2p+PXFao5XNxySbpy1rdqTagLvhgzLiUqcUD7x2W/bwpdfDi1ZcT550JuuK1mUd
m/pWkmvQrUm3Uo7PTbmz1XZg3u2k0R+a49/PXhozd9GF92Rxa8InrWv/x93tvyk3
rvg062jUn5/fTM5JW/rMV6Xqg/PPzWg9o/7oPYvX5F2vN1r1LiwenV18puRxwGvd
o8+iWwH0KSZ8ggQdRUyH/7dzFhTa7FYL5XC2oLKLCrXxnYdSLquryFxgLYqlXLYC
K5XjLCkqtg5xOKk0cxmlibUkDLEYhlh0VEmhxeyyFvtvI/BJKA7sGMVOqI25++E3
iyK0oDMUh2vOIBRoLRXqDNJo4jWJ8RpTaHlQOypRq1Ppqehca4HZbo2jIB9KYqAo
1eDhmuI1OsyGjeP1sDWU98lOolINLXp26hJHOajWVEIc5VZP65ZKadTxsJWJirba
bQU2BxxTC6VBuCghqM7dipOo9PR0KlGvVmnjKE47bCuU7rAOlrBParq7sE/QjB5a
03qsGeMToR3sjDFBrdIkcfphRP1FaInxWuQaRqF7zMHQIRNUdJ9sbCEmdFNQhtlC
uZyU2WKhip0wZZ25OJmpQmuhy2axIll2ka23eRQVbbcWF1OufLOD0uqbIieRaxoN
tKPRGD1hNMZrdQgZSpJozALoYr651ErlOR1WiFxkKzUX55TYzUVYzZhE5SEpY8dW
iAdAm+geAajU1m6v8EILB4QyOyz4AxoZKhqHFI+ZCVt2C1pTDvPNUitE6dwN8mEe
GPQqozsgTDt1vNbADLsWjYFWjaNsSNSrDIkmT5w1WqyYiIAMiQYIbrHl5tqgHy7K
5hhmzXHZnI44ahylV1MlXThutsF+UNE4g6hCe0kxpaG7FkPj6hAunQsJdO5q6VFM
a5dNqeJVVLRnrE108lLtKJMe+mLSm+JQXhA0oSqCiaFMhgRGI5aPRStALINGhdIQ
eogmDqPOhE2TaFTBSNDtEuITmChQarVWpVaz5gQjw97SvOKKeYPsQSmeWGiA4QTA
oabt8OaVxmPEYECxdg8kqhtViRQUMYNMsoOG0eSJqR6W0Bozp5lI0Z6h3mvUKIfd
ccGxT0R5hMRGJE70ZDdHqk2EDB2rJZpfiWhqMLFmQPRkbJMIrE6NYLUCWGcQ8kA4
OgbUfYORvcBAb3W00Ij6aFJz4wvFGvFRgtmoYSJngGUCJyUqIqfTsTvo7nqim4kT
i2YmaDyO0mxegHQwQDaHzWUz2+1lnhlUGkcvDFo1rnfsjWaLjrVisw2jgdKZuNZR
muk03DTD6QHFKN6oqSqhncpg0qr07vChSWCCq6bBlABDQi9KmIdW5K4oDVHyMe0M
KpM7sh6neLksMAZHxJBYMSKheMXnjIO2oiVuSA8FXGJxIPIq1mZzMTXS5sqnnK58
axFlMZcVI5d16JKERouNysDp8MVhU1BXaERPuUbR7RkfPVctJj/VKrjcFzlL8vJh
RafiXMBg1/DlSgU21wNgP/6FAhH625MMPyQ/CFxogX5Fb9y4MaiO/n8cDP4jRxr0
NgrtJdlSOfMqLYTA5iuYv2mhGwCErQJABMNlTks/VjLnkdEvj2y+AtsNxDX6hr5A
8CwuUd+5muh2GrctDx/1DLVFXihAPK7xrXDx1bgU4mtwzRu+HLTHNbFoZGApPxpK
0A3z+b0i+d4dl8K+ZeGat74pwBRc41vh4k/FpRB/Gq55w5eDNbhG++7RoR9REAjW
4ZKPIAdbGDm/FR2xrZjHb6UEO3GN7wspYrtwKfRoN67xkbkRu4hrfCtc/B9wKcS/
hGve8OXMyx/FfJfhHTQfQQmCMJ/fK5LvwVhT2LcaRGR235RAjXXQZp3bFmmxrSiA
VgKaXXKfC0T67JBg5TXJfX7dJ5oCrCGicXHW+cSRg71YR2yU9xMRlOCo5Ih9IxKx
Y0RkbsS+JfpIitgpn2gKIMcXCT4aF0eJdbzhwKtDAFcaAJ7hcZSgDsaREp+6WFMY
n3o+e6IEDYkekeLTyCeaHLTGOmKZ0IaIoAQdJHuaIeJpRyIy11OrZE/zJKAtkNzn
hSJ9ftunlQDwSQBXGgA+5XHk4HORmNPcbUQrcrBbpBU9UnuJrZTgsGSvj4h4fZSI
zJ1l94lWuPgPRPD/lIDfAFe94zfEOkL8KMz3hi/Hv+yLxzaViKAEnYi9IsW2s0jf
uhCRuXnbE1elzIJePtEUYDgRjYtT4BNHCaZI9n2qiO/TfFqRg+W4iv7jtqXHZQUR
QQnWSu7bOpG+rScicyNwhBhJ0rh84xMtAJwL5EoDwHkeRwkuSPbroohfP/jsiRJc
k+zXDZ9oclALixCPi0ZzIzCTjyAH9URa0eOOH3wiaKUETXBVSnyexwrC+DQlInPj
o8IiKfGJ94kGVwAiGhenqwScYRJw7D5x4LzGIikxnIoVhDGcJsHKG8TekmI4xyea
AiwnonFxVkjA2S4BZ6dPHDn4DovEsvcCEUEJfsJVKZH/GSsII3+ViMyN/G0s4vtI
ivxvPtEUIAxPZD4aFycc63jDgXMK60jxvQXWFPoe79OKHHTGOsJxobmZRAQ56CnS
ih7NXsRWSjBIskeDRTwaQkTmxi2PGH/SaNp8oinAGCIaF2ecBJw3JODM8YmjBMsl
x/AjkRiukGBlLbG3pBiu94mmAL8T0bg4d33iyEFN5Ixo1tXCUj6CEtTDfCkRq481
hRFrQETmRkyNdfg+kiKm9YkmB+kinqJaIOgggtCP2CoQDCDqB4AcJZ9j4XGUIF+y
X8OIVrhRGit5LMaJjMV4CVYWSe7zEgloGyT3eaNInzf5tCIH3xLHDk8KyD1FRJCD
AOQkoRU9I+RYym+lBDUwX4pHIVhT6FEoEZkbt2ZYR8ooREtAay25z8kifW4jwUqG
5D538onWAjTENTiHgBbYQOmjYaAeGA45BfCfAyAN+mGJAVDDAoaBzgwnAHPmQc5Y
hoP+rpMP9kHOpwxHjjkPIOcimIMf30LTvtSKjyAjFUxovAvy2np4NIm12Me0mMfi
0STWIrId3eKB5BYZTIv4dh4eTWItXmJamAUtYlMK8F+k0EkWNCD4x89WQ36NaX1S
VoBuh8bkwI/ESR+Fjg0UWB0uKs3ssgInjmPbwiKVNlGlVWs1gG6BMBwgjNuiYxrU
x+i0Eko7Bwbo6nRZhzqdwwUqKBccOC+6FznREQauGP1zgFCOGWsRVweluwP/6Q5C
uJw5TjtXjpLcQTMYfiGTjgC8Bp4HtDMzJoI2E358kPxc/dxkRsghz9EzE3MOSwZt
oqNAFeewmlLt0rT6fBvwH6ryRWKHqmQwqioPG6Y6quEjVaoEylqRA65iKrfIWUDl
sM/A5drySoqsKjw/ZHjYEdHZ6u3vwS2Yv9fK8frDXnvE5hokPNeERJprE7a+E/1C
1Z5r6N//Zq4FQJtRgM6EBDzNqMz2Halo9CkWnxeLjfFPO5/kbdqhwXFTHK5p1ZpE
+pybWqtmTT4495z4tAeVEKoCFECD6h4wBM6ebe4ZRj9uLZC5sjfzNbsEVBfLibOr
7cfzq/jsQu08s6upUtamydn7yQuDCiXOrkBoswksu6fTRy/dh4jpOUbPriF4vP1z
zCfx55gwY8FPX9UfSZ2QmLGdShwqjUaFJuPTk7HoC4InYyG12Xbzz2Td7yOS3ZFj
Z5kwY9FRrWhY9slO6tyNgnnLSdkis8vmZB+A96etT+KnrfvSEABHYqmHDZdsVHMG
eXKimLI5cuwlFrgLszkoc06Jy8qOPWUe6iy1xtGHjs0Wiw2dUjbb8fXDyLmq4KOA
6ORlHl6GQtPNOfmUxYkON1tsOeh2BQod3/Y0oaLNpXktqD7ZaNTj8WeYDfBzDLwu
pQE0Cdy7QJTr3neBYqcCfX9DFbuOiX+zJF3HgLlls7iqfR1DqORVga5ySbgqKKBN
9IDb7umqdmVGtCbQV7BUUw94AXM4qY5dtO38a4FPElsL0DYx0cOGaY9q3Rz2MqrA
lmOFX8JclKvIim9CwZMZxRtuIPKtcBkYaS2yUt1Te8JlweEqctqLY5783hH8dK2J
Si71SpxpLlOpDU/ZlRh1njzn3AnAnizCOaeENtF3dMHdaLGUORf2suKseDG8JpTY
0ZXZ4Z+CPklsCqKX05Sx+HG4hu44gtfTJMqIT/qbqGgdvCrGUTp4PWxJmSvuXYpB
N0fhm9Ko6ASskUDS0CZUYHgO8CMsfP6+uCVldZTAvRYey/jCfCuc92WFVvoXmXyz
PRfdw1VsLii0W1siNHRzk2iP0K0MWnzrQBK6sYhleR6l9dz6hC1T+VYXuyMx6JY5
fEcBG76Ygw/hdQw8c4ObaFfQbXn45jWS68WUCvbH3Rs3uArIZehnbfc2g15YyNsM
+qdx+sd44TaD/aO4AnxegSZEcP+4vs0nTgA4wZMGgG95HAVoiNPJu61GWMebrUrb
Js1+dLFF1d4m1QJiSzZd5RJ7yQ6ckMIW/U2SpfwXAAD//wMALQHz5A==</Template></GraphPadPrismFile>
