# Supplementary material for: CD8+ T cell self-tolerance permits responsiveness but limits tissue damage
Source: eLife journal article supplement (doi:10.7554/elife.65615), 2021-04-30
Supplement: fig6-data1 [file elife-65615-fig6-data1-v2.pzfx]

<?xml version="1.0" encoding="UTF-8"?><GraphPadPrismFile PrismXMLVersion="5.00">
<Created>
<OriginalVersion CreatedByProgram="GraphPad Prism" CreatedByVersion="9.1.0.216" Login="emilytruckenbrod" DateTime="2021-04-29T15:20:07-05:00"></OriginalVersion>
<MostRecentVersion CreatedByProgram="GraphPad Prism" CreatedByVersion="9.1.0.216" Login="emilytruckenbrod" DateTime="2021-04-29T16:10:34-05:00"></MostRecentVersion>
</Created>
<InfoSequence>
<Ref ID="Info0"></Ref>
<Ref ID="Info1"></Ref>
<Ref ID="Info2"></Ref>
<Ref ID="Info3"></Ref>
<Ref ID="Info4"></Ref>
<Ref ID="Info5"></Ref>
<Ref ID="Info6" Selected="1"></Ref>
<Ref ID="Info7"></Ref>
</InfoSequence>
<TableSequence Selected="1">
<Ref ID="Table0"></Ref>
<Ref ID="Table17"></Ref>
<Ref ID="Table20"></Ref>
<Ref ID="Table23"></Ref>
<Ref ID="Table26"></Ref>
<Ref ID="Table27"></Ref>
<Ref ID="Table28"></Ref>
<Ref ID="Table29"></Ref>
<Ref ID="Table30" Selected="1"></Ref>
<Ref ID="Table31"></Ref>
</TableSequence>
<Table ID="Table0" XFormat="numbers" TableType="Survival" EVFormat="AsteriskAfterNumber">
<Title>Compiled Kaplan Meier curve of vitiligo development in B6</Title>
<Info ID="Info0">
<Title>Compiled Kaplan Meier curve of vitiligo development in B6</Title>
<Notes>
<Font Color="#000000" Face="Helvetica">9/20/19, 11/4/19, 2/11/20 experiments<BR></BR></Font>
</Notes>
<Constant><Name>Experiment Date</Name><Value>2021-04-29</Value></Constant>
<Constant><Name>Experiment ID</Name><Value></Value></Constant>
<Constant><Name>Notebook ID</Name><Value></Value></Constant>
<Constant><Name>Project</Name><Value></Value></Constant>
<Constant><Name>Experimenter</Name><Value></Value></Constant>
<Constant><Name>Protocol</Name><Value></Value></Constant>
</Info>

<RowTitlesColumn Width="32">
<Subcolumn></Subcolumn>
</RowTitlesColumn>
<XColumn Width="104" Subcolumns="1" Decimals="0">
<Title><TextAlign align="Center">Days elapsed</TextAlign></Title>
<Subcolumn>
<d>17</d>
<d>22</d>
<d>22</d>
<d>22</d>
<d>22</d>
<d>22</d>
<d>30</d>
<d>30</d>
<d>30</d>
<d>52</d>
<d>86</d>
<d>93</d>
<d>93</d>
<d>93</d>
<d>93</d>
<d>93</d>
<d>93</d>
<d>93</d>
<d></d>
<d></d>
<d></d>
<d></d>
<d></d>
<d></d>
<d></d>
<d></d>
<d>22</d>
<d>86</d>
<d>86</d>
<d>86</d>
<d>86</d>
<d></d>
<d>20</d>
<d>20</d>
<d>20</d>
<d>26</d>
<d>20</d>
<d>34</d>
<d>26</d>
<d>26</d>
<d>34</d>
<d>55</d>
<d>90</d>
<d>67</d>
<d>90</d>
<d>90</d>
<d>90</d>
<d></d>
<d></d>
<d></d>
<d></d>
<d></d>
<d></d>
<d>17</d>
<d>17</d>
<d>23</d>
<d>23</d>
<d>23</d>
<d>23</d>
<d>23</d>
<d>23</d>
<d>23</d>
<d>23</d>
<d>23</d>
<d>48</d>
<d>90</d>
<d>90</d>
<d>90</d>
<d>90</d>
</Subcolumn>
</XColumn>
<XAdvancedColumn Version="1" Width="104" Decimals="0" Subcolumns="1">
<Title><TextAlign align="Center">Days elapsed</TextAlign></Title>
<Subcolumn>
<d>17</d>
<d>22</d>
<d>22</d>
<d>22</d>
<d>22</d>
<d>22</d>
<d>30</d>
<d>30</d>
<d>30</d>
<d>52</d>
<d>86</d>
<d>93</d>
<d>93</d>
<d>93</d>
<d>93</d>
<d>93</d>
<d>93</d>
<d>93</d>
<d></d>
<d></d>
<d></d>
<d></d>
<d></d>
<d></d>
<d></d>
<d></d>
<d>22</d>
<d>86</d>
<d>86</d>
<d>86</d>
<d>86</d>
<d></d>
<d>20</d>
<d>20</d>
<d>20</d>
<d>26</d>
<d>20</d>
<d>34</d>
<d>26</d>
<d>26</d>
<d>34</d>
<d>55</d>
<d>90</d>
<d>67</d>
<d>90</d>
<d>90</d>
<d>90</d>
<d></d>
<d></d>
<d></d>
<d></d>
<d></d>
<d></d>
<d>17</d>
<d>17</d>
<d>23</d>
<d>23</d>
<d>23</d>
<d>23</d>
<d>23</d>
<d>23</d>
<d>23</d>
<d>23</d>
<d>23</d>
<d>48</d>
<d>90</d>
<d>90</d>
<d>90</d>
<d>90</d>
</Subcolumn>
</XAdvancedColumn>
<YColumn Width="81" Decimals="0" Subcolumns="1">
<Title><TextAlign align="Center">KO 50,000</TextAlign></Title>
<Subcolumn>
<d>1</d>
<d>1</d>
<d>1</d>
<d>1</d>
<d>1</d>
<d>1</d>
<d>1</d>
<d>1</d>
<d>1</d>
<d></d>
<d></d>
<d></d>
<d></d>
<d></d>
<d></d>
<d></d>
<d></d>
<d></d>
<d></d>
<d></d>
<d></d>
<d></d>
<d></d>
<d></d>
<d></d>
<d></d>
<d></d>
<d></d>
<d></d>
<d></d>
<d></d>
<d></d>
<d></d>
<d>1</d>
<d>1</d>
<d>1</d>
<d></d>
<d></d>
<d>1</d>
<d>1</d>
<d></d>
<d></d>
<d></d>
<d></d>
<d></d>
<d></d>
<d></d>
<d></d>
<d></d>
<d></d>
<d></d>
<d></d>
<d></d>
<d>1</d>
<d>1</d>
<d>1</d>
<d>1</d>
<d>1</d>
</Subcolumn>
</YColumn>
<YColumn Width="81" Decimals="0" Subcolumns="1">
<Title><TextAlign align="Center">WT 50,000</TextAlign></Title>
<Subcolumn>
<d></d>
<d></d>
<d></d>
<d></d>
<d></d>
<d></d>
<d></d>
<d></d>
<d></d>
<d>1</d>
<d>1</d>
<d>0</d>
<d>0</d>
<d>0</d>
<d>0</d>
<d>0</d>
<d>0</d>
<d>0</d>
<d></d>
<d></d>
<d></d>
<d></d>
<d></d>
<d></d>
<d></d>
<d></d>
<d></d>
<d></d>
<d></d>
<d></d>
<d></d>
<d></d>
<d>1</d>
<d></d>
<d></d>
<d></d>
<d></d>
<d>1</d>
<d></d>
<d></d>
<d>1</d>
<d>1</d>
<d>0</d>
<d></d>
<d></d>
<d></d>
<d></d>
<d></d>
<d></d>
<d></d>
<d></d>
<d></d>
<d></d>
<d></d>
<d></d>
<d></d>
<d></d>
<d></d>
<d>1</d>
<d>1</d>
<d>1</d>
<d>1</d>
<d>1</d>
<d>1</d>
</Subcolumn>
</YColumn>
<YColumn Width="98" Decimals="0" Subcolumns="1">
<Title>No cell transfer</Title>
<Subcolumn>
<d></d>
<d></d>
<d></d>
<d></d>
<d></d>
<d></d>
<d></d>
<d></d>
<d></d>
<d></d>
<d></d>
<d></d>
<d></d>
<d></d>
<d></d>
<d></d>
<d></d>
<d></d>
<d></d>
<d></d>
<d></d>
<d></d>
<d></d>
<d></d>
<d></d>
<d></d>
<d>1</d>
<d>0</d>
<d>0</d>
<d>0</d>
<d>0</d>
<d></d>
<d></d>
<d></d>
<d></d>
<d></d>
<d>1</d>
<d></d>
<d></d>
<d></d>
<d></d>
<d></d>
<d></d>
<d>1</d>
<d>0</d>
<d>0</d>
<d>0</d>
<d></d>
<d></d>
<d></d>
<d></d>
<d></d>
<d></d>
<d></d>
<d></d>
<d></d>
<d></d>
<d></d>
<d></d>
<d></d>
<d></d>
<d></d>
<d></d>
<d></d>
<d>1</d>
<d>0</d>
<d>0</d>
<d>0</d>
<d>0</d>
</Subcolumn>
</YColumn>
</Table>
<Table ID="Table17" XFormat="none" YFormat="replicates" Replicates="40" TableType="TwoWay" EVFormat="AsteriskAfterNumber">
<Title>Compiled vitiligo scores in B6_line graph</Title>
<Info ID="Info1">
<Title>Compiled vitiligo scores in B6_line graph</Title>
<Notes>
<Font Color="#000000" Face="Helvetica">9/20/19, 11/4/19, 2/11/20 experiments</Font>
</Notes>
<Constant><Name>Experiment Date</Name><Value>2021-04-29</Value></Constant>
<Constant><Name>Experiment ID</Name><Value></Value></Constant>
<Constant><Name>Notebook ID</Name><Value></Value></Constant>
<Constant><Name>Project</Name><Value></Value></Constant>
<Constant><Name>Experimenter</Name><Value></Value></Constant>
<Constant><Name>Protocol</Name><Value></Value></Constant>
</Info>

<RowTitlesColumn Width="44">
<Subcolumn>
<d>17-21</d>
<d>22-26</d>
<d>27-31</d>
<d>32-41</d>
<d>42-51</d>
<d>52-61</d>
<d>62-71</d>
<d>72-81</d>
<d>82-93</d>
</Subcolumn>
</RowTitlesColumn>
<YColumn Width="3240" Decimals="0" Subcolumns="40">
<Title><TextAlign align="Left">KO recip expt 5</TextAlign></Title>
<Subcolumn>
<d>1</d>
<d>2</d>
<d>2</d>
<d>5</d>
<d>3</d>
<d>3</d>
<d>4</d>
<d>3</d>
<d>3</d>
</Subcolumn>
<Subcolumn>
<d>0</d>
<d>1</d>
<d>2</d>
<d>5</d>
<d>3</d>
<d>3</d>
<d>4</d>
<d>4</d>
<d>3</d>
</Subcolumn>
<Subcolumn>
<d>1</d>
<d>1</d>
<d>2</d>
<d>5</d>
<d>3</d>
<d>3</d>
<d>4</d>
<d>4</d>
<d>3</d>
</Subcolumn>
<Subcolumn>
<d>0</d>
<d>2</d>
<d>2</d>
<d>5</d>
<d>3</d>
<d>3</d>
<d>4</d>
<d>4</d>
<d>4</d>
</Subcolumn>
<Subcolumn>
<d>1</d>
<d>0</d>
<d>3</d>
<d>5</d>
<d>3</d>
<d>3</d>
<d>3</d>
<d>4</d>
<d>4</d>
</Subcolumn>
<Subcolumn>
<d>2</d>
<d>3</d>
<d>4</d>
<d>4</d>
<d>4</d>
<d>4</d>
<d>4</d>
<d>4</d>
<d>4</d>
</Subcolumn>
<Subcolumn>
<d>1</d>
<d>2</d>
<d>3</d>
<d>5</d>
<d>3</d>
<d>3</d>
<d>3</d>
<d>4</d>
<d>3</d>
</Subcolumn>
<Subcolumn>
<d>0</d>
<d>3</d>
<d>4</d>
<d>4</d>
<d>4</d>
<d>4</d>
<d>4</d>
<d>5</d>
<d>5</d>
</Subcolumn>
<Subcolumn>
<d>0</d>
<d>2</d>
<d>2</d>
<d>4</d>
<d>3</d>
<d>2</d>
<d>3</d>
<d>3</d>
<d>4</d>
</Subcolumn>
<Subcolumn>
<d>1</d>
<d>4</d>
<d>5</d>
<d>4</d>
<d>5</d>
<d>5</d>
<d>5</d>
<d>5</d>
<d>5</d>
</Subcolumn>
<Subcolumn>
<d>2</d>
<d>4</d>
<d>5</d>
<d>3</d>
<d>5</d>
<d>5</d>
<d>4</d>
<d>5</d>
<d>5</d>
</Subcolumn>
<Subcolumn>
<d>1</d>
<d>4</d>
<d>5</d>
<d>3</d>
<d>5</d>
<d>5</d>
<d>4</d>
<d>5</d>
<d>5</d>
</Subcolumn>
<Subcolumn>
<d>1</d>
<d>4</d>
<d>4</d>
<d>3</d>
<d>5</d>
<d>5</d>
<d>5</d>
<d>5</d>
<d>5</d>
</Subcolumn>
<Subcolumn>
<d>2</d>
<d>4</d>
<d>5</d>
<d>3</d>
<d>5</d>
<d>4</d>
<d>5</d>
<d>5</d>
<d>5</d>
</Subcolumn>
<Subcolumn>
<d>3</d>
<d>4</d>
<d></d>
<d>3</d>
<d>4</d>
<d>5</d>
<d>5</d>
<d>3</d>
<d>3</d>
</Subcolumn>
<Subcolumn>
<d>1</d>
<d>3</d>
<d></d>
<d>3</d>
<d>5</d>
<d>5</d>
<d>5</d>
<d>3</d>
<d>3</d>
</Subcolumn>
<Subcolumn>
<d>0</d>
<d>4</d>
<d></d>
<d>3</d>
<d>4</d>
<d>5</d>
<d>5</d>
<d>3</d>
<d>3</d>
</Subcolumn>
<Subcolumn>
<d>0</d>
<d>2</d>
<d></d>
<d>4</d>
<d>5</d>
<d>5</d>
<d>5</d>
<d>3</d>
<d>3</d>
</Subcolumn>
<Subcolumn>
<d>2</d>
<d>4</d>
<d></d>
<d>2</d>
<d>4</d>
<d>5</d>
<d>4</d>
<d>4</d>
<d>5</d>
</Subcolumn>
<Subcolumn>
<d></d>
<d></d>
<d></d>
<d>5</d>
<d></d>
<d>3</d>
<d>5</d>
<d>4</d>
<d>5</d>
</Subcolumn>
<Subcolumn>
<d></d>
<d></d>
<d></d>
<d>5</d>
<d></d>
<d>3</d>
<d>5</d>
<d>3</d>
<d>4</d>
</Subcolumn>
<Subcolumn>
<d></d>
<d></d>
<d></d>
<d>5</d>
<d></d>
<d>3</d>
<d>5</d>
<d>4</d>
<d>5</d>
</Subcolumn>
<Subcolumn>
<d></d>
<d></d>
<d></d>
<d>5</d>
<d></d>
<d>3</d>
<d>5</d>
<d>4</d>
<d>4</d>
</Subcolumn>
<Subcolumn>
<d></d>
<d></d>
<d></d>
<d>5</d>
<d></d>
<d>3</d>
<d>5</d>
<d>5</d>
<d>5</d>
</Subcolumn>
<Subcolumn>
<d></d>
<d></d>
<d></d>
<d>5</d>
<d></d>
<d>4</d>
<d>5</d>
<d>5</d>
<d>5</d>
</Subcolumn>
<Subcolumn>
<d></d>
<d></d>
<d></d>
<d>5</d>
<d></d>
<d>3</d>
<d>5</d>
<d>5</d>
<d>5</d>
</Subcolumn>
<Subcolumn>
<d></d>
<d></d>
<d></d>
<d>5</d>
<d></d>
<d>4</d>
<d>5</d>
<d>5</d>
<d>5</d>
</Subcolumn>
<Subcolumn>
<d></d>
<d></d>
<d></d>
<d>5</d>
<d></d>
<d>2</d>
<d>5</d>
<d>5</d>
<d>5</d>
</Subcolumn>
<Subcolumn>
<d></d>
<d></d>
<d></d>
<d>4</d>
<d></d>
<d></d>
<d>5</d>
<d></d>
<d>5</d>
</Subcolumn>
<Subcolumn>
<d></d>
<d></d>
<d></d>
<d></d>
<d></d>
<d></d>
<d></d>
<d></d>
<d>5</d>
</Subcolumn>
<Subcolumn>
<d></d>
<d></d>
<d></d>
<d></d>
<d></d>
<d></d>
<d></d>
<d></d>
<d>5</d>
</Subcolumn>
<Subcolumn>
<d></d>
<d></d>
<d></d>
<d></d>
<d></d>
<d></d>
<d></d>
<d></d>
<d>5</d>
</Subcolumn>
<Subcolumn>
<d></d>
<d></d>
<d></d>
<d></d>
<d></d>
<d></d>
<d></d>
<d></d>
<d>5</d>
</Subcolumn>
<Subcolumn>
<d></d>
<d></d>
<d></d>
<d></d>
<d></d>
<d></d>
<d></d>
<d></d>
<d>5</d>
</Subcolumn>
<Subcolumn>
<d></d>
<d></d>
<d></d>
<d></d>
<d></d>
<d></d>
<d></d>
<d></d>
<d>5</d>
</Subcolumn>
<Subcolumn>
<d></d>
<d></d>
<d></d>
<d></d>
<d></d>
<d></d>
<d></d>
<d></d>
<d>5</d>
</Subcolumn>
<Subcolumn>
<d></d>
<d></d>
<d></d>
<d></d>
<d></d>
<d></d>
<d></d>
<d></d>
<d>5</d>
</Subcolumn>
<Subcolumn>
<d></d>
<d></d>
<d></d>
<d></d>
<d></d>
<d></d>
<d></d>
<d></d>
<d>5</d>
</Subcolumn>
<Subcolumn>
<d></d>
<d></d>
<d></d>
<d></d>
<d></d>
<d></d>
<d></d>
<d></d>
<d></d>
</Subcolumn>
<Subcolumn>
<d></d>
<d></d>
<d></d>
<d></d>
<d></d>
<d></d>
<d></d>
<d></d>
<d></d>
</Subcolumn>
</YColumn>
<YColumn Width="3240" Decimals="0" Subcolumns="40">
<Title>WT recip expt 5</Title>
<Subcolumn>
<d>0</d>
<d>0</d>
<d>1</d>
<d>2</d>
<d>0</d>
<d>0</d>
<d>1</d>
<d>0</d>
<d>0</d>
</Subcolumn>
<Subcolumn>
<d>1</d>
<d>1</d>
<d>0</d>
<d>2</d>
<d>1</d>
<d>1</d>
<d>1</d>
<d>0</d>
<d>1</d>
</Subcolumn>
<Subcolumn>
<d>0</d>
<d>0</d>
<d>1</d>
<d>2</d>
<d>1</d>
<d>1</d>
<d>0</d>
<d>0</d>
<d>1</d>
</Subcolumn>
<Subcolumn>
<d>0</d>
<d>1</d>
<d>1</d>
<d>2</d>
<d>1</d>
<d>2</d>
<d>2</d>
<d>2</d>
<d>2</d>
</Subcolumn>
<Subcolumn>
<d>0</d>
<d>1</d>
<d>1</d>
<d>2</d>
<d>1</d>
<d>1</d>
<d>1</d>
<d>1</d>
<d>2</d>
</Subcolumn>
<Subcolumn>
<d>0</d>
<d>0</d>
<d>0</d>
<d>3</d>
<d>1</d>
<d>0</d>
<d>1</d>
<d>1</d>
<d>1</d>
</Subcolumn>
<Subcolumn>
<d>0</d>
<d>1</d>
<d>1</d>
<d>1</d>
<d>1</d>
<d>1</d>
<d>1</d>
<d>1</d>
<d>0</d>
</Subcolumn>
<Subcolumn>
<d>0</d>
<d>1</d>
<d>0</d>
<d>4</d>
<d>0</d>
<d>0</d>
<d>0</d>
<d>0</d>
<d>0</d>
</Subcolumn>
<Subcolumn>
<d>1</d>
<d>1</d>
<d>0</d>
<d>1</d>
<d>0</d>
<d>1</d>
<d>0</d>
<d>0</d>
<d>0</d>
</Subcolumn>
<Subcolumn>
<d>0</d>
<d>2</d>
<d>2</d>
<d>2</d>
<d>2</d>
<d>1</d>
<d>1</d>
<d>1</d>
<d>1</d>
</Subcolumn>
<Subcolumn>
<d>1</d>
<d>3</d>
<d>2</d>
<d>2</d>
<d>3</d>
<d>3</d>
<d>3</d>
<d>2</d>
<d>2</d>
</Subcolumn>
<Subcolumn>
<d>1</d>
<d>3</d>
<d>2</d>
<d>0</d>
<d>3</d>
<d>2</d>
<d>2</d>
<d>1</d>
<d>2</d>
</Subcolumn>
<Subcolumn>
<d>1</d>
<d>2</d>
<d>2</d>
<d>1</d>
<d>2</d>
<d>3</d>
<d>2</d>
<d>2</d>
<d>2</d>
</Subcolumn>
<Subcolumn>
<d>0</d>
<d>2</d>
<d>2</d>
<d>1</d>
<d>2</d>
<d>2</d>
<d>2</d>
<d>2</d>
<d>2</d>
</Subcolumn>
<Subcolumn>
<d>0</d>
<d>2</d>
<d>2</d>
<d>1</d>
<d>3</d>
<d>2</d>
<d>2</d>
<d>0</d>
<d>1</d>
</Subcolumn>
<Subcolumn>
<d>0</d>
<d>2</d>
<d></d>
<d>1</d>
<d>1</d>
<d>3</d>
<d>3</d>
<d>0</d>
<d>1</d>
</Subcolumn>
<Subcolumn>
<d>2</d>
<d>4</d>
<d></d>
<d>0</d>
<d>3</d>
<d>3</d>
<d>2</d>
<d>1</d>
<d>0</d>
</Subcolumn>
<Subcolumn>
<d>0</d>
<d>1</d>
<d></d>
<d>1</d>
<d>1</d>
<d>2</d>
<d>2</d>
<d>2</d>
<d>2</d>
</Subcolumn>
<Subcolumn>
<d>0</d>
<d>1</d>
<d></d>
<d>1</d>
<d>2</d>
<d>2</d>
<d>2</d>
<d>1</d>
<d>2</d>
</Subcolumn>
<Subcolumn>
<d>0</d>
<d>1</d>
<d></d>
<d>1</d>
<d>2</d>
<d>3</d>
<d>2</d>
<d>1</d>
<d>1</d>
</Subcolumn>
<Subcolumn>
<d></d>
<d></d>
<d></d>
<d>2</d>
<d></d>
<d>1</d>
<d>3</d>
<d>1</d>
<d>1</d>
</Subcolumn>
<Subcolumn>
<d></d>
<d></d>
<d></d>
<d>2</d>
<d></d>
<d>1</d>
<d>3</d>
<d>0</d>
<d>0</d>
</Subcolumn>
<Subcolumn>
<d></d>
<d></d>
<d></d>
<d>3</d>
<d></d>
<d>1</d>
<d>2</d>
<d>0</d>
<d>0</d>
</Subcolumn>
<Subcolumn>
<d></d>
<d></d>
<d></d>
<d>2</d>
<d></d>
<d>2</d>
<d>3</d>
<d>3</d>
<d>1</d>
</Subcolumn>
<Subcolumn>
<d></d>
<d></d>
<d></d>
<d>2</d>
<d></d>
<d>2</d>
<d>3</d>
<d>3</d>
<d>3</d>
</Subcolumn>
<Subcolumn>
<d></d>
<d></d>
<d></d>
<d>3</d>
<d></d>
<d>1</d>
<d>3</d>
<d>3</d>
<d>1</d>
</Subcolumn>
<Subcolumn>
<d></d>
<d></d>
<d></d>
<d>1</d>
<d></d>
<d>1</d>
<d>3</d>
<d>3</d>
<d>2</d>
</Subcolumn>
<Subcolumn>
<d></d>
<d></d>
<d></d>
<d>4</d>
<d></d>
<d>1</d>
<d>3</d>
<d>3</d>
<d>2</d>
</Subcolumn>
<Subcolumn>
<d></d>
<d></d>
<d></d>
<d>2</d>
<d></d>
<d>1</d>
<d>3</d>
<d>3</d>
<d>4</d>
</Subcolumn>
<Subcolumn>
<d></d>
<d></d>
<d></d>
<d>3</d>
<d></d>
<d></d>
<d>3</d>
<d></d>
<d>4</d>
</Subcolumn>
<Subcolumn>
<d></d>
<d></d>
<d></d>
<d>2</d>
<d></d>
<d></d>
<d>3</d>
<d></d>
<d>4</d>
</Subcolumn>
<Subcolumn>
<d></d>
<d></d>
<d></d>
<d></d>
<d></d>
<d></d>
<d></d>
<d></d>
<d>2</d>
</Subcolumn>
<Subcolumn>
<d></d>
<d></d>
<d></d>
<d></d>
<d></d>
<d></d>
<d></d>
<d></d>
<d>4</d>
</Subcolumn>
<Subcolumn>
<d></d>
<d></d>
<d></d>
<d></d>
<d></d>
<d></d>
<d></d>
<d></d>
<d>4</d>
</Subcolumn>
<Subcolumn>
<d></d>
<d></d>
<d></d>
<d></d>
<d></d>
<d></d>
<d></d>
<d></d>
<d>3</d>
</Subcolumn>
<Subcolumn>
<d></d>
<d></d>
<d></d>
<d></d>
<d></d>
<d></d>
<d></d>
<d></d>
<d>3</d>
</Subcolumn>
<Subcolumn>
<d></d>
<d></d>
<d></d>
<d></d>
<d></d>
<d></d>
<d></d>
<d></d>
<d>3</d>
</Subcolumn>
<Subcolumn>
<d></d>
<d></d>
<d></d>
<d></d>
<d></d>
<d></d>
<d></d>
<d></d>
<d>3</d>
</Subcolumn>
<Subcolumn>
<d></d>
<d></d>
<d></d>
<d></d>
<d></d>
<d></d>
<d></d>
<d></d>
<d>3</d>
</Subcolumn>
<Subcolumn>
<d></d>
<d></d>
<d></d>
<d></d>
<d></d>
<d></d>
<d></d>
<d></d>
<d>3</d>
</Subcolumn>
</YColumn>
<YColumn Width="3240" Decimals="0" Subcolumns="40">
<Title><TextAlign align="Left">No cell transfer expt 5</TextAlign></Title>
<Subcolumn>
<d>0</d>
<d>2</d>
<d>2</d>
<d>1</d>
<d>2</d>
<d>2</d>
<d>2</d>
<d>2</d>
<d>1</d>
</Subcolumn>
<Subcolumn>
<d>0</d>
<d>0</d>
<d>0</d>
<d>1</d>
<d>0</d>
<d>0</d>
<d>0</d>
<d>0</d>
<d>0</d>
</Subcolumn>
<Subcolumn>
<d>1</d>
<d>1</d>
<d>1</d>
<d>1</d>
<d>1</d>
<d>2</d>
<d>1</d>
<d>1</d>
<d>1</d>
</Subcolumn>
<Subcolumn>
<d>1</d>
<d>0</d>
<d>1</d>
<d>0</d>
<d>0</d>
<d>0</d>
<d>0</d>
<d>0</d>
<d>1</d>
</Subcolumn>
<Subcolumn>
<d>0</d>
<d>1</d>
<d>1</d>
<d>0</d>
<d>1</d>
<d>1</d>
<d>0</d>
<d>1</d>
<d>0</d>
</Subcolumn>
<Subcolumn>
<d>1</d>
<d>1</d>
<d>1</d>
<d>0</d>
<d>1</d>
<d>0</d>
<d>0</d>
<d>0</d>
<d>0</d>
</Subcolumn>
<Subcolumn>
<d>0</d>
<d>0</d>
<d>1</d>
<d>2</d>
<d>1</d>
<d>2</d>
<d>2</d>
<d>2</d>
<d>2</d>
</Subcolumn>
<Subcolumn>
<d>0</d>
<d>0</d>
<d>1</d>
<d>1</d>
<d>2</d>
<d>0</d>
<d>1</d>
<d>3</d>
<d>3</d>
</Subcolumn>
<Subcolumn>
<d>0</d>
<d>0</d>
<d>1</d>
<d>1</d>
<d>2</d>
<d>1</d>
<d>1</d>
<d>1</d>
<d>1</d>
</Subcolumn>
<Subcolumn>
<d>1</d>
<d>0</d>
<d>1</d>
<d>0</d>
<d>1</d>
<d>1</d>
<d>2</d>
<d>0</d>
<d>1</d>
</Subcolumn>
<Subcolumn>
<d>0</d>
<d>0</d>
<d></d>
<d>2</d>
<d>0</d>
<d>1</d>
<d>1</d>
<d>2</d>
<d>2</d>
</Subcolumn>
<Subcolumn>
<d>2</d>
<d>2</d>
<d></d>
<d>0</d>
<d>2</d>
<d>1</d>
<d>3</d>
<d>1</d>
<d>0</d>
</Subcolumn>
<Subcolumn>
<d>0</d>
<d>0</d>
<d></d>
<d>1</d>
<d>1</d>
<d>2</d>
<d>2</d>
<d>0</d>
<d>1</d>
</Subcolumn>
<Subcolumn>
<d>0</d>
<d>1</d>
<d></d>
<d>0</d>
<d>1</d>
<d>1</d>
<d>1</d>
<d>1</d>
<d>1</d>
</Subcolumn>
<Subcolumn>
<d>0</d>
<d>0</d>
<d></d>
<d>0</d>
<d>0</d>
<d>0</d>
<d>0</d>
<d>0</d>
<d>0</d>
</Subcolumn>
<Subcolumn>
<d></d>
<d></d>
<d></d>
<d>2</d>
<d></d>
<d>2</d>
<d>1</d>
<d>1</d>
<d>0</d>
</Subcolumn>
<Subcolumn>
<d></d>
<d></d>
<d></d>
<d>1</d>
<d></d>
<d>0</d>
<d>1</d>
<d>1</d>
<d>2</d>
</Subcolumn>
<Subcolumn>
<d></d>
<d></d>
<d></d>
<d>1</d>
<d></d>
<d>1</d>
<d>2</d>
<d>2</d>
<d>3</d>
</Subcolumn>
<Subcolumn>
<d></d>
<d></d>
<d></d>
<d>2</d>
<d></d>
<d>1</d>
<d>0</d>
<d>1</d>
<d>1</d>
</Subcolumn>
<Subcolumn>
<d></d>
<d></d>
<d></d>
<d>0</d>
<d></d>
<d>0</d>
<d>0</d>
<d>1</d>
<d>1</d>
</Subcolumn>
<Subcolumn>
<d></d>
<d></d>
<d></d>
<d>0</d>
<d></d>
<d></d>
<d>1</d>
<d></d>
<d>0</d>
</Subcolumn>
<Subcolumn>
<d></d>
<d></d>
<d></d>
<d>2</d>
<d></d>
<d></d>
<d>1</d>
<d></d>
<d>0</d>
</Subcolumn>
<Subcolumn>
<d></d>
<d></d>
<d></d>
<d>1</d>
<d></d>
<d></d>
<d>2</d>
<d></d>
<d>2</d>
</Subcolumn>
<Subcolumn>
<d></d>
<d></d>
<d></d>
<d>1</d>
<d></d>
<d></d>
<d>0</d>
<d></d>
<d>0</d>
</Subcolumn>
<Subcolumn>
<d></d>
<d></d>
<d></d>
<d>1</d>
<d></d>
<d></d>
<d>1</d>
<d></d>
<d>0</d>
</Subcolumn>
<Subcolumn>
<d></d>
<d></d>
<d></d>
<d></d>
<d></d>
<d></d>
<d></d>
<d></d>
<d>1</d>
</Subcolumn>
<Subcolumn>
<d></d>
<d></d>
<d></d>
<d></d>
<d></d>
<d></d>
<d></d>
<d></d>
<d>1</d>
</Subcolumn>
<Subcolumn>
<d></d>
<d></d>
<d></d>
<d></d>
<d></d>
<d></d>
<d></d>
<d></d>
<d>2</d>
</Subcolumn>
<Subcolumn>
<d></d>
<d></d>
<d></d>
<d></d>
<d></d>
<d></d>
<d></d>
<d></d>
<d>1</d>
</Subcolumn>
<Subcolumn>
<d></d>
<d></d>
<d></d>
<d></d>
<d></d>
<d></d>
<d></d>
<d></d>
<d>1</d>
</Subcolumn>
<Subcolumn>
<d></d>
<d></d>
<d></d>
<d></d>
<d></d>
<d></d>
<d></d>
<d></d>
<d></d>
</Subcolumn>
<Subcolumn>
<d></d>
<d></d>
<d></d>
<d></d>
<d></d>
<d></d>
<d></d>
<d></d>
<d></d>
</Subcolumn>
<Subcolumn>
<d></d>
<d></d>
<d></d>
<d></d>
<d></d>
<d></d>
<d></d>
<d></d>
<d></d>
</Subcolumn>
<Subcolumn>
<d></d>
<d></d>
<d></d>
<d></d>
<d></d>
<d></d>
<d></d>
<d></d>
<d></d>
</Subcolumn>
<Subcolumn>
<d></d>
<d></d>
<d></d>
<d></d>
<d></d>
<d></d>
<d></d>
<d></d>
<d></d>
</Subcolumn>
<Subcolumn>
<d></d>
<d></d>
<d></d>
<d></d>
<d></d>
<d></d>
<d></d>
<d></d>
<d></d>
</Subcolumn>
<Subcolumn>
<d></d>
<d></d>
<d></d>
<d></d>
<d></d>
<d></d>
<d></d>
<d></d>
<d></d>
</Subcolumn>
<Subcolumn>
<d></d>
<d></d>
<d></d>
<d></d>
<d></d>
<d></d>
<d></d>
<d></d>
<d></d>
</Subcolumn>
<Subcolumn>
<d></d>
<d></d>
<d></d>
<d></d>
<d></d>
<d></d>
<d></d>
<d></d>
<d></d>
</Subcolumn>
<Subcolumn>
<d></d>
<d></d>
<d></d>
<d></d>
<d></d>
<d></d>
<d></d>
<d></d>
<d></d>
</Subcolumn>
</YColumn>
</Table>
<Table ID="Table20" XFormat="none" TableType="OneWay" EVFormat="AsteriskAfterNumber">
<Title>Compiled no. transferred Trp2+ per uL blood (expt. 5, 6)</Title>
<Info ID="Info2">
<Title>Compiled no. transferred Trp2+ per uL blood (expt. 5, 6)</Title>
<Notes>
<Font Color="#000000" Face="Helvetica">11/4/2019, 2/11/2020 experiments<BR></BR></Font>
</Notes>
<Constant><Name>Experiment Date</Name><Value>2021-04-29</Value></Constant>
<Constant><Name>Experiment ID</Name><Value></Value></Constant>
<Constant><Name>Notebook ID</Name><Value></Value></Constant>
<Constant><Name>Project</Name><Value></Value></Constant>
<Constant><Name>Experimenter</Name><Value></Value></Constant>
<Constant><Name>Protocol</Name><Value></Value></Constant>
</Info>

<RowTitlesColumn Width="32">
<Subcolumn></Subcolumn>
</RowTitlesColumn>
<YColumn Width="136" Decimals="1" Subcolumns="1">
<Title>Recipients of WT cells</Title>
<Subcolumn>
<d>267.4</d>
<d>156.1</d>
<d>110.4</d>
<d>159.4</d>
<d>522.6</d>
<d>168.8</d>
<d></d>
<d>156.1</d>
<d>116.8</d>
<d>69.1</d>
<d>145.2</d>
<d>70.7</d>
<d>73</d>
<d>35.6</d>
<d>143.4</d>
<d>76</d>
<d>85.3</d>
<d>42.5</d>
<d>54.5</d>
</Subcolumn>
</YColumn>
<YColumn Width="144" Decimals="1" Subcolumns="1">
<Title>Recipients of <I>Dct</I><SUP>-/-</SUP> cells</Title>
<Subcolumn>
<d>368.8</d>
<d>471.5</d>
<d>366.7</d>
<d>127.8</d>
<d>286.3</d>
<d></d>
<d></d>
<d>162.1</d>
<d>301.3</d>
<d>258.5</d>
<d>107.3</d>
<d>79.9</d>
<d>13.7</d>
<d>157.1</d>
<d>79.3</d>
<d>78</d>
<d>284.6</d>
<d>251.2</d>
<d>100.6</d>
</Subcolumn>
</YColumn>
</Table>
<Table ID="Table23" XFormat="numbers" YFormat="replicates" Replicates="1" TableType="XY" EVFormat="AsteriskAfterNumber">
<Title>Average vitiligo score by no. trans Trp2+ (combined expt 5, 6) final</Title>
<Info ID="Info3">
<Title>Average vitiligo score by no. trans Trp2+ (combined expt 5, 6) final</Title>
<Notes>
<Font Size="8" Color="#000000" Face="Arial"><BR></BR>Blue= Expt. 5 (11/4/19)<BR></BR>Purple = Expt. 6 (2/11/20)</Font>
</Notes>
<Constant><Name>Experiment Date</Name><Value>2020-05-23</Value></Constant>
<Constant><Name>Experiment ID</Name><Value></Value></Constant>
<Constant><Name>Notebook ID</Name><Value></Value></Constant>
<Constant><Name>Project</Name><Value></Value></Constant>
<Constant><Name>Experimenter</Name><Value></Value></Constant>
<Constant><Name>Protocol</Name><Value></Value></Constant>
</Info>

<RowTitlesColumn Width="84">
<Subcolumn></Subcolumn>
</RowTitlesColumn>
<XColumn Width="101" Subcolumns="1" Decimals="1">
<Title>No. trans Trp2+</Title>
<Subcolumn>
<d></d>
<d></d>
<d></d>
<d></d>
<d></d>
<d></d>
<d>156.1</d>
<d>116.8</d>
<d>69.1</d>
<d>145.2</d>
<d>70.7</d>
<d>73</d>
<d>35.6</d>
<d>143.4</d>
<d>76</d>
<d></d>
<d>267.4</d>
<d>156.1</d>
<d>110.4</d>
<d>159.4</d>
<d>522.6</d>
<d>168.8</d>
<d></d>
<d>301.3</d>
<d>258.5</d>
<d>107.3</d>
<d>79.9</d>
<d>13.7</d>
<d>157.1</d>
<d>79.3</d>
<d>78</d>
<d>284.6</d>
<d></d>
<d>368.8</d>
<d>471.5</d>
<d>366.7</d>
<d>127.8</d>
<d>286.3</d>
</Subcolumn>
</XColumn>
<XAdvancedColumn Version="1" Width="101" Decimals="1" Subcolumns="1">
<Title>No. trans Trp2+</Title>
<Subcolumn>
<d></d>
<d></d>
<d></d>
<d></d>
<d></d>
<d></d>
<d>156.1</d>
<d>116.8</d>
<d>69.1</d>
<d>145.2</d>
<d>70.7</d>
<d>73</d>
<d>35.6</d>
<d>143.4</d>
<d>76</d>
<d></d>
<d>267.4</d>
<d>156.1</d>
<d>110.4</d>
<d>159.4</d>
<d>522.6</d>
<d>168.8</d>
<d></d>
<d>301.3</d>
<d>258.5</d>
<d>107.3</d>
<d>79.9</d>
<d>13.7</d>
<d>157.1</d>
<d>79.3</d>
<d>78</d>
<d>284.6</d>
<d></d>
<d>368.8</d>
<d>471.5</d>
<d>366.7</d>
<d>127.8</d>
<d>286.3</d>
</Subcolumn>
</XAdvancedColumn>
<YColumn Width="131" Decimals="8" Subcolumns="1">
<Title>Average vitiligo score</Title>
<Subcolumn>
<d></d>
<d></d>
<d></d>
<d></d>
<d></d>
<d></d>
<d>0.33333333</d>
<d>0.75</d>
<d>0.58333333</d>
<d>1.5</d>
<d>1.16666667</d>
<d>0.58333333</d>
<d>0.83333333</d>
<d>0.25</d>
<d>0.41666667</d>
<d></d>
<d>2.25</d>
<d>2.66666667</d>
<d>2.75</d>
<d>2.16666667</d>
<d>2.33333333</d>
<d>2.66666667</d>
<d></d>
<d>2.75</d>
<d>2.66666667</d>
<d>2.75</d>
<d>2.83333333</d>
<d>3</d>
<d>3.75</d>
<d>2.91666667</d>
<d>3.83333333</d>
<d>2.58333333</d>
<d></d>
<d>4.58333333</d>
<d>4.66666667</d>
<d>4.58333333</d>
<d>4.5</d>
<d>4.66666667</d>
</Subcolumn>
</YColumn>
</Table>
<Table ID="Table26" XFormat="numbers" TableType="Survival" EVFormat="AsteriskAfterNumber">
<Title>Kaplan Meier curve of vitiligo development in P14 mice</Title>
<Info ID="Info4">
<Title>Kaplan Meier curve of vitiligo development in P14 mice</Title>
<Notes>
<Font Color="#000000" Face="Helvetica">11/10/2020<BR></BR></Font>
</Notes>
<Constant><Name>Experiment Date</Name><Value>2021-04-29</Value></Constant>
<Constant><Name>Experiment ID</Name><Value></Value></Constant>
<Constant><Name>Notebook ID</Name><Value></Value></Constant>
<Constant><Name>Project</Name><Value></Value></Constant>
<Constant><Name>Experimenter</Name><Value></Value></Constant>
<Constant><Name>Protocol</Name><Value></Value></Constant>
</Info>

<RowTitlesColumn Width="84">
<Subcolumn></Subcolumn>
</RowTitlesColumn>
<XColumn Width="166" Subcolumns="1" Decimals="0">
<Title>Days elapsed since transfer</Title>
<Subcolumn>
<d>20</d>
<d>27</d>
<d>79</d>
<d>79</d>
<d>91</d>
<d></d>
<d>23</d>
<d>23</d>
<d>30</d>
<d>44</d>
<d>44</d>
<d>62</d>
<d>91</d>
<d>91</d>
<d>23</d>
<d>23</d>
<d>44</d>
<d>51</d>
<d>91</d>
</Subcolumn>
</XColumn>
<XAdvancedColumn Version="1" Width="166" Decimals="0" Subcolumns="1">
<Title>Days elapsed since transfer</Title>
<Subcolumn>
<d>20</d>
<d>27</d>
<d>79</d>
<d>79</d>
<d>91</d>
<d></d>
<d>23</d>
<d>23</d>
<d>30</d>
<d>44</d>
<d>44</d>
<d>62</d>
<d>91</d>
<d>91</d>
<d>23</d>
<d>23</d>
<d>44</d>
<d>51</d>
<d>91</d>
</Subcolumn>
</XAdvancedColumn>
<YColumn Width="91" Decimals="0" Subcolumns="1">
<Title><TextAlign align="Left">KO recip, PBS</TextAlign></Title>
<Subcolumn>
<d>1</d>
<d>1</d>
<d>1</d>
<d>1</d>
<d>0</d>
</Subcolumn>
</YColumn>
<YColumn Width="92" Decimals="0" Subcolumns="1">
<Title><TextAlign align="Left">WT recip, PBS</TextAlign></Title>
<Subcolumn>
<d></d>
<d></d>
<d></d>
<d></d>
<d></d>
<d></d>
<d></d>
<d></d>
<d></d>
<d></d>
<d>1</d>
<d>1</d>
<d>0</d>
<d>0</d>
</Subcolumn>
</YColumn>
<YColumn Width="107" Decimals="0" Subcolumns="1">
<Title>No transfer, PBS</Title>
<Subcolumn>
<d></d>
<d></d>
<d></d>
<d></d>
<d></d>
<d></d>
<d></d>
<d></d>
<d></d>
<d></d>
<d></d>
<d></d>
<d></d>
<d></d>
<d></d>
<d></d>
<d></d>
<d>1</d>
<d>0</d>
</Subcolumn>
</YColumn>
</Table>
<Table ID="Table27" XFormat="none" YFormat="replicates" Replicates="5" TableType="TwoWay" EVFormat="AsteriskAfterNumber">
<Title>Vitiligo scores P14 mice</Title>
<Info ID="Info5">
<Title>Vitiligo scores P14 mice</Title>
<Notes>
<Font Color="#000000" Face="Helvetica">11/10/2020<BR></BR></Font>
</Notes>
<Constant><Name>Experiment Date</Name><Value>2021-04-29</Value></Constant>
<Constant><Name>Experiment ID</Name><Value></Value></Constant>
<Constant><Name>Notebook ID</Name><Value></Value></Constant>
<Constant><Name>Project</Name><Value></Value></Constant>
<Constant><Name>Experimenter</Name><Value></Value></Constant>
<Constant><Name>Protocol</Name><Value></Value></Constant>
</Info>

<RowTitlesColumn Width="32">
<Subcolumn>
<d>17</d>
<d>20</d>
<d>23</d>
<d>27</d>
<d>30</d>
<d>34</d>
<d>37</d>
<d>41</d>
<d>44</d>
<d>48</d>
<d>51</d>
<d>55</d>
<d>58</d>
<d>62</d>
<d>65</d>
<d>69</d>
<d>72</d>
<d>76</d>
<d>79</d>
<d>83</d>
<d>85</d>
<d>91</d>
</Subcolumn>
</RowTitlesColumn>
<YColumn Width="405" Decimals="0" Subcolumns="5">
<Title><TextAlign align="Left">KO recip, PBS</TextAlign></Title>
<Subcolumn>
<d>0</d>
<d>2</d>
<d>2</d>
<d>2</d>
<d>2</d>
<d>2</d>
<d>2</d>
<d>4</d>
<d>3</d>
<d>4</d>
<d>3</d>
<d>4</d>
<d>4</d>
<d>4</d>
<d>4</d>
<d>4</d>
<d>4</d>
<d>4</d>
<d>4</d>
<d>4</d>
<d>4</d>
<d>4</d>
</Subcolumn>
<Subcolumn>
<d>0</d>
<d>0</d>
<d>0</d>
<d>0</d>
<d>1</d>
<d>0</d>
<d>0</d>
<d>0</d>
<d>0</d>
<d>1</d>
<d>1</d>
<d>1</d>
<d>1</d>
<d>1</d>
<d>0</d>
<d>0</d>
<d>1</d>
<d>1</d>
<d>0</d>
<d>1</d>
<d>0</d>
<d>0</d>
</Subcolumn>
<Subcolumn>
<d>0</d>
<d>0</d>
<d>0</d>
<d>0</d>
<d>1</d>
<d>0</d>
<d>1</d>
<d>1</d>
<d>1</d>
<d>0</d>
<d>1</d>
<d>0</d>
<d>2</d>
<d>0</d>
<d>2</d>
<d>1</d>
<d>2</d>
<d>1</d>
<d>2</d>
<d>2</d>
<d>2</d>
<d>2</d>
</Subcolumn>
<Subcolumn>
<d>0</d>
<d>0</d>
<d>1</d>
<d>2</d>
<d>3</d>
<d>3</d>
<d>3</d>
<d>3</d>
<d>3</d>
<d>3</d>
<d>3</d>
<d>3</d>
<d>4</d>
<d>3</d>
<d>4</d>
<d>3</d>
<d>4</d>
<d>3</d>
<d>4</d>
<d>3</d>
<d>4</d>
<d>3</d>
</Subcolumn>
<Subcolumn>
<d>0</d>
<d>0</d>
<d>0</d>
<d>0</d>
<d>0</d>
<d>0</d>
<d>0</d>
<d>0</d>
<d>0</d>
<d>0</d>
<d>0</d>
<d>1</d>
<d>0</d>
<d>3</d>
<d>0</d>
<d>2</d>
<d>1</d>
<d>0</d>
<d>2</d>
<d>3</d>
<d>3</d>
<d>0</d>
</Subcolumn>
</YColumn>
<YColumn Width="405" Decimals="0" Subcolumns="5">
<Title><TextAlign align="Left">WT recip, PBS</TextAlign></Title>
<Subcolumn>
<d>0</d>
<d>0</d>
<d>0</d>
<d>1</d>
<d>0</d>
<d>0</d>
<d>0</d>
<d>0</d>
<d>1</d>
<d>0</d>
<d>1</d>
<d>1</d>
<d>1</d>
<d>0</d>
<d>1</d>
<d>1</d>
<d>0</d>
<d>1</d>
<d>1</d>
<d>1</d>
<d>1</d>
<d>2</d>
</Subcolumn>
<Subcolumn>
<d>0</d>
<d>1</d>
<d>1</d>
<d>0</d>
<d>0</d>
<d>1</d>
<d>1</d>
<d>0</d>
<d>0</d>
<d>0</d>
<d>0</d>
<d>0</d>
<d>0</d>
<d>0</d>
<d>0</d>
<d>0</d>
<d>0</d>
<d>0</d>
<d>0</d>
<d>0</d>
<d>0</d>
<d>0</d>
</Subcolumn>
<Subcolumn>
<d>0</d>
<d>2</d>
<d>0</d>
<d>1</d>
<d>1</d>
<d>1</d>
<d>0</d>
<d>1</d>
<d>2</d>
<d>2</d>
<d>2</d>
<d>2</d>
<d>2</d>
<d>2</d>
<d>2</d>
<d>2</d>
<d>2</d>
<d>2</d>
<d>2</d>
<d>0</d>
<d>2</d>
<d>2</d>
</Subcolumn>
<Subcolumn>
<d>0</d>
<d>0</d>
<d>1</d>
<d>0</d>
<d>1</d>
<d>0</d>
<d>1</d>
<d></d>
<d>1</d>
<d>0</d>
<d>1</d>
<d>1</d>
<d>1</d>
<d>2</d>
<d>2</d>
<d>2</d>
<d>2</d>
<d>3</d>
<d>2</d>
<d>2</d>
<d>2</d>
<d>2</d>
</Subcolumn>
<Subcolumn>
<d></d>
<d></d>
<d></d>
<d></d>
<d></d>
<d></d>
<d></d>
<d></d>
<d></d>
<d></d>
<d></d>
<d></d>
<d></d>
<d></d>
<d></d>
<d></d>
<d></d>
<d></d>
<d></d>
<d></d>
<d></d>
<d></d>
</Subcolumn>
</YColumn>
<YColumn Width="405" Decimals="0" Subcolumns="5">
<Title>No transfer, PBS</Title>
<Subcolumn>
<d>0</d>
<d>0</d>
<d>1</d>
<d>0</d>
<d>0</d>
<d>0</d>
<d>0</d>
<d>1</d>
<d>1</d>
<d>0</d>
<d>0</d>
<d>0</d>
<d>0</d>
<d>0</d>
<d>0</d>
<d>0</d>
<d>0</d>
<d>0</d>
<d>0</d>
<d>0</d>
<d>0</d>
<d>0</d>
</Subcolumn>
<Subcolumn>
<d>0</d>
<d>0</d>
<d>0</d>
<d>1</d>
<d>1</d>
<d>1</d>
<d>0</d>
<d>1</d>
<d>2</d>
<d>1</d>
<d>2</d>
<d>2</d>
<d>2</d>
<d>2</d>
<d>2</d>
<d>2</d>
<d>2</d>
<d>2</d>
<d>2</d>
<d>2</d>
<d>2</d>
<d>2</d>
</Subcolumn>
<Subcolumn>
<d></d>
<d></d>
<d></d>
<d></d>
<d></d>
<d></d>
<d></d>
<d></d>
<d></d>
<d></d>
<d></d>
<d></d>
<d></d>
<d></d>
<d></d>
<d></d>
<d></d>
<d></d>
<d></d>
<d></d>
<d></d>
<d></d>
</Subcolumn>
<Subcolumn>
<d></d>
<d></d>
<d></d>
<d></d>
<d></d>
<d></d>
<d></d>
<d></d>
<d></d>
<d></d>
<d></d>
<d></d>
<d></d>
<d></d>
<d></d>
<d></d>
<d></d>
<d></d>
<d></d>
<d></d>
<d></d>
<d></d>
</Subcolumn>
<Subcolumn>
<d></d>
<d></d>
<d></d>
<d></d>
<d></d>
<d></d>
<d></d>
<d></d>
<d></d>
<d></d>
<d></d>
<d></d>
<d></d>
<d></d>
<d></d>
<d></d>
<d></d>
<d></d>
<d></d>
<d></d>
<d></d>
<d></d>
</Subcolumn>
</YColumn>
</Table>
<Table ID="Table28" XFormat="none" TableType="OneWay" EVFormat="AsteriskAfterNumber">
<Title>Compiled no. Trp2+ per flank</Title>
<Info ID="Info6">
<Title>Compiled no. Trp2+ per flank</Title>
<Notes>
<Font Color="#000000" Face="Helvetica">Harvests on day 11 and 12 after cell transfer<BR></BR>20210407<BR></BR>20210218</Font>
</Notes>
<Constant><Name>Experiment Date</Name><Value>2021-04-29</Value></Constant>
<Constant><Name>Experiment ID</Name><Value></Value></Constant>
<Constant><Name>Notebook ID</Name><Value></Value></Constant>
<Constant><Name>Project</Name><Value></Value></Constant>
<Constant><Name>Experimenter</Name><Value></Value></Constant>
<Constant><Name>Protocol</Name><Value></Value></Constant>
</Info>

<RowTitlesColumn Width="32">
<Subcolumn></Subcolumn>
</RowTitlesColumn>
<YColumn Width="82" Decimals="2" Subcolumns="1">
<Title>WT (L flank)</Title>
<Subcolumn>
<d></d>
<d>171.29</d>
<d></d>
<d></d>
<d>480.9</d>
<d>208</d>
<d>518.6</d>
<d>58.5</d>
<d>627.6</d>
<d>444.9</d>
<d>178.3</d>
</Subcolumn>
</YColumn>
<YColumn Width="90" Decimals="2" Subcolumns="1">
<Title><I>Dct</I><SUP><I>-/-</I></SUP> (L flank)</Title>
<Subcolumn>
<d>67.65</d>
<d></d>
<d>232.06</d>
<d>85.96</d>
<d>235.7</d>
<d>141</d>
<d>498.7</d>
<d>797.6</d>
<d>656.8</d>
<d>478.3</d>
<d>181.9</d>
</Subcolumn>
</YColumn>
<YColumn Width="85" Decimals="2" Subcolumns="1">
<Title>WT (R flank)</Title>
<Subcolumn>
<d></d>
<d>58.41</d>
<d>323.34</d>
<d></d>
<d>169.3</d>
<d>111.7</d>
<d>332.8</d>
<d>210.9</d>
<d>902.7</d>
<d>37.6</d>
<d>163.5</d>
</Subcolumn>
</YColumn>
<YColumn Width="93" Decimals="2" Subcolumns="1">
<Title><I>Dct</I><SUP><I>-/-</I></SUP> (R flank)</Title>
<Subcolumn>
<d></d>
<d></d>
<d>151.93</d>
<d>297.11</d>
<d>122.7</d>
<d>116.2</d>
<d>308.7</d>
<d>396.6</d>
<d>391.2</d>
<d>516.3</d>
<d>49.3</d>
</Subcolumn>
</YColumn>
</Table>
<Table ID="Table29" XFormat="none" TableType="OneWay" EVFormat="AsteriskAfterNumber">
<Title>% CD49a+ (skin d11) transferred</Title>
<RowTitlesColumn Width="1">
<Subcolumn></Subcolumn>
</RowTitlesColumn>
<YColumn Width="82" Decimals="2" Subcolumns="1">
<Title>WT (L flank)</Title>
<Subcolumn>
<d></d>
<d>31</d>
<d>31.8</d>
<d>29.6</d>
<d></d>
<d>36.2</d>
<d>33.7</d>
<d>35</d>
<d>30</d>
</Subcolumn>
</YColumn>
<YColumn Width="90" Decimals="2" Subcolumns="1">
<Title><I>Dct</I><SUP><I>-/-</I></SUP> (L flank)</Title>
<Subcolumn>
<d>27.3</d>
<d></d>
<d>31.6</d>
<d>24.2</d>
<d></d>
<d>62.7</d>
<d>42.3</d>
<d>57.9</d>
</Subcolumn>
</YColumn>
<YColumn Width="85" Decimals="2" Subcolumns="1">
<Title>WT (R flank)</Title>
<Subcolumn>
<d></d>
<d>31</d>
<d>22.7</d>
<d>40</d>
<d></d>
<d>36.8</d>
<d>34.1</d>
<d>35.4</d>
<d>39</d>
</Subcolumn>
</YColumn>
<YColumn Width="93" Decimals="2" Subcolumns="1">
<Title><I>Dct</I><SUP><I>-/-</I></SUP> (R flank)</Title>
<Subcolumn>
<d>0</d>
<d></d>
<d>13.6</d>
<d>39.6</d>
<d></d>
<d>50</d>
<d>28.8</d>
<d>57.6</d>
</Subcolumn>
</YColumn>
</Table>
<Table ID="Table30" XFormat="none" TableType="OneWay" EVFormat="AsteriskAfterNumber">
<Title>% PD-1 + (Trp2+, skin, d11) transferred</Title>
<RowTitlesColumn Width="1">
<Subcolumn></Subcolumn>
</RowTitlesColumn>
<YColumn Width="82" Decimals="2" Subcolumns="1">
<Title>WT (L flank)</Title>
<Subcolumn>
<d></d>
<d>12.7</d>
<d>0</d>
<d>3.7</d>
<d>8.33</d>
<d>9.62</d>
<d>18.5</d>
<d>5.12</d>
<d>19.4</d>
<d>3.05</d>
<d>0</d>
</Subcolumn>
</YColumn>
<YColumn Width="90" Decimals="2" Subcolumns="1">
<Title><I>Dct</I><SUP><I>-/-</I></SUP> (L flank)</Title>
<Subcolumn>
<d>9.09</d>
<d></d>
<d>3.95</d>
<d>3.03</d>
<d>40.7</d>
<d>11.3</d>
<d>9.09</d>
<d>16</d>
<d>7.72</d>
<d>0.83</d>
<d>13.8</d>
</Subcolumn>
</YColumn>
<YColumn Width="85" Decimals="2" Subcolumns="1">
<Title>WT (R flank)</Title>
<Subcolumn>
<d></d>
<d>3.45</d>
<d>14.8</d>
<d>20</d>
<d>14</d>
<d>7.32</d>
<d>9.49</d>
<d>7.79</d>
<d>34.2</d>
<d>5.88</d>
<d>27.3</d>
</Subcolumn>
</YColumn>
<YColumn Width="93" Decimals="2" Subcolumns="1">
<Title><I>Dct</I><SUP><I>-/-</I></SUP> (R flank)</Title>
<Subcolumn>
<d>0</d>
<d></d>
<d>9.09</d>
<d>15.1</d>
<d>8.33</d>
<d>9.62</d>
<d>18.5</d>
<d>5.12</d>
<d>19.4</d>
<d>3.05</d>
<d>0</d>
</Subcolumn>
</YColumn>
</Table>
<Table ID="Table31" XFormat="none" TableType="OneWay" EVFormat="AsteriskAfterNumber">
<Title>PE tetramer MFI (Trp2+) transferred</Title>
<Info ID="Info7">
<Title>PE tetramer MFI (Trp2+) transferred</Title>
<Notes>
<Font Color="#000000" Face="Helvetica">20210407</Font>
</Notes>
<Constant><Name>Experiment Date</Name><Value>2021-04-29</Value></Constant>
<Constant><Name>Experiment ID</Name><Value></Value></Constant>
<Constant><Name>Notebook ID</Name><Value></Value></Constant>
<Constant><Name>Project</Name><Value></Value></Constant>
<Constant><Name>Experimenter</Name><Value></Value></Constant>
<Constant><Name>Protocol</Name><Value></Value></Constant>
</Info>

<RowTitlesColumn Width="1">
<Subcolumn></Subcolumn>
</RowTitlesColumn>
<YColumn Width="82" Decimals="2" Subcolumns="1">
<Title>WT (L flank)</Title>
<Subcolumn>
<d>1274</d>
<d>1231</d>
<d>1375</d>
<d>1258</d>
<d>1025</d>
<d>1241</d>
<d>1284</d>
</Subcolumn>
</YColumn>
<YColumn Width="90" Decimals="2" Subcolumns="1">
<Title><I>Dct</I><SUP><I>-/-</I></SUP> (L flank)</Title>
<Subcolumn>
<d>2110</d>
<d>2001</d>
<d>1808</d>
<d>2198</d>
<d>2603</d>
<d>2061</d>
<d>1922</d>
</Subcolumn>
</YColumn>
<YColumn Width="85" Decimals="2" Subcolumns="1">
<Title>WT (R flank)</Title>
<Subcolumn>
<d>1462</d>
<d>1720</d>
<d>1289</d>
<d>1094</d>
<d>1064</d>
<d>1801</d>
<d>1600</d>
</Subcolumn>
</YColumn>
<YColumn Width="93" Decimals="2" Subcolumns="1">
<Title><I>Dct</I><SUP><I>-/-</I></SUP> (R flank)</Title>
<Subcolumn>
<d>1963</d>
<d>2188</d>
<d>1850</d>
<d>2188</d>
<d>2299</d>
<d>2005</d>
<d>1804</d>
</Subcolumn>
</YColumn>
<YColumn Width="83" Decimals="2" Subcolumns="1">
<Title>WT (spleen)</Title>
<Subcolumn>
<d>895</d>
<d>950</d>
<d>1007</d>
<d>890</d>
<d>934</d>
<d>1132</d>
<d>1045</d>
</Subcolumn>
</YColumn>
<YColumn Width="91" Decimals="2" Subcolumns="1">
<Title><I>Dct</I><SUP><I>-/-</I></SUP> (spleen)</Title>
<Subcolumn>
<d>1456</d>
<d>1557</d>
<d>1429</d>
<d>1866</d>
<d>1894</d>
<d>1630</d>
<d>1713</d>
</Subcolumn>
</YColumn>
</Table>

<!--Analyses, graphs and layouts as compressed binary. Don&apos;t edit this part of the file.-->

<Template dt:dt="bin.base64" xmlns:dt="urn:schemas-microsoft-com:datatypes">eF7svQVcVcvXP3zo7kbi0CHd3Q3SjTRISHPoRlIaRBqkRFRCWlJKQaQbBKSURkJS
4D0H9F7vvd77+L7/5/P8f899+e7PsGdmr7VmzazZM7P27LNRlZSRkVUX54IKRAUA
APFQ8VDQ4GAB0IXOBViDc0JgAH8AJA31LT4BDtDgtCXA4UeSf4QWQOPPWZeADlSl
AwDEv6UswQEOHPbBRZGBz/DgANEPAkgcGRwQwAENcKUN4rdrWOCACw4E4EAMDjfA
gQQcSAFXcsi/0V3jGte4xjWucY3/XEDmdmhwgCxCYAFXawLI/H+Na1zjGte4xjX+
9+Dv5nOILw/x4ZEAV749CuB3f/8a17jGNa5xjWtc4xrXuMY1rnGNa/z34p/882tc
4xrXuMY1rvG/AzAACfBfdfB0rgT7+/nXcXFxAcCAhgIgYFy9YWcP8wi8JIC/TL0H
p6zgmQCIGN9Fwl29GQgLyIS8a/cLyAQAyEjLrpYda8iOiBbgGAJA7jItB/j9RcP/
UyD+9oLgd5ABhEQ97e2A7pYurjaODsKU7CxslEBLB3NHCxsHK2FKLU0ZZj5KURFk
IQopFUlNPVVpoJOdjSsIqKoloSQvCaRkZmUVd3Kys2RlldKUAqoqyWtoAsEyWFml
lSmBlNYgkJMAK6uHhweLKYSKxdzRHkLoyqrq4uhk6QLyUgILYwYzsFiALCjBxVxJ
/4M64FwLG3OQCDKS0F1LLxGwiG/CnFxsHEAsqqZWljKOLvamIJarEwisuSrkkqWL
ECuEA8z4TcDPJYBszO9agljMXSxNQY6/8SAJuYLAl61+ILd1NLuiFWL9du2/EGkD
srQXd3Ex9fpdqCkkCYn9rtTfyPiVikF4v6kiraqhomysI2PMy8PBZqxh6WJj6fqj
nn9TyjdNXUGmIEsZO1OrHyVDirKydBFhE2L9Hr1UnPW35mT9Xp3f8n5ayA9VUb0l
5+hi4+3oADK1U4do+O+w0N9UC8IJVtpOhJdDiPUy8vfS/uctoQLuI2CFQeBb7d9j
h59U6scWZP9jC/5c4P+8KTTMTe3AzfTvMcOfKgThuez/7P+B94E2eCayMf+XjUc/
qdRvRviPHI2+K/yvuxX+pmK/WeM/5JZwdTPTvCrHyRS8NjO2cbjjaPy9zX5mC9Vb
qqpSqhBaSUcLS2VTe8vfm+q39vlpUX9jtV812z8K/avdfjTcj5b7L2vxg0ZKlqDL
ZdeP66l/VONntvpbY/1grR/M9aMNf9NU08XUwdXucnrTuNTlUvX/1Y3/C1X6QT0t
DeB/hjE0bRytTP+q6v+q1v+bOvygj4Mps91/QHP/uaQ/DLDiFrZuriBLC0imuqX5
b8PV/yZb/FnMr1XwT1L/oZX/+dLVqoCXm4Wdn5+fm52dl52Pl/vHaek7DTf/P9D8
YD5I6mfV+r/eQ8Bd/V/eRf5cwz+J/W5JZj4WLjY2Ng4uLnYuNh6On1obTMPJDwEP
Ox83JxsHLyfXz8h4+ThZuMFUvNzcfNz8nD/vOTxs/0T0H9Z1wG0oD17+sPy+OJCy
sbd0gDyU+nf0nF+p4J+k/kMr//OlK/Oz/8Hn+J7Ny//H7P/cfvCXSfLfYv+/VOwH
Jf9jZ//f9ddyMP272fFfYqF/qOGfxP5DO//zpat78V82//+8Bf88Pf4LO8mfq/gn
ud9teb0CuIz9rKTfW9bJyeKng+S/otv8XeV+UPQ/wdf+m5LEVeW1rzYKf7fKNzXZ
2Fg42H71SR/Iy+kHu/7FQH9qNM0/G+s3Zf+pjL/q+neq/pOUHzX9e0W/ewV/1vS7
okKsl7usIsjwgVcvuSFcbo9fQdzFxtTu9w3i/xKNEBHfcCXnardaztLO3RKstunv
l/8R8T9scl/JgQiG+n+tz49y4MX8rl7fowYA/H+LPfhtF5wD8D0FYboA4yoFKfn3
FOQlwN9TECmQVNRlTOwCAEgGjCBcfVYHkv//XdvrT/Zc4xrXuMY1rvF/G5CJOeNy
jofgNcAd+molcI1r/M8CWoz/cp0OACxdrkznA5EAAuCzpKO9k42dpQVQ0dTJztQB
eMvSxtIFaO7m4m4JdLwDdLcB2djZWDkCLSzdLe0cnewtHUBAGwegBA8AGcD0p1dK
IStXOOir8x+v/P8X39sI8uMfAQAm+O/eBSQOBbgA2+HiAhpQB2ACXHkEf/4Y1x64
HSEf5fwzBH8bUYQueSEf+fj+YyPIle++xs+ACPQFXPkCv8rx3w3hy1IBgEe/eUmQ
0tcA3/WC4J9+OvWzT5tAWgkdHDDAAdLGkE+XYoMDDuDKH8IDB3zAlV9ECA5EgL/6
R6IAIOCqREjp3zX4ju/+ndilLA3w/WHjbmoHdHJxdHJ0gbx04PoTARB8dwoh164E
QBSnApqCgC42rnd/4LpyVcGAxf3NefydC1IlycvbEuyrO5mCeR0dfsYMru93a/7O
DGkfKVOQKdDVzd7e1MXrB8bfgPi7W/q94mJXIn9ODLHJLxNDjPfLxBAr/zIxxDC/
TAzpNz8hRgYCAX8lhtjpR2IU4D8QQ3riLxNDuuwvE0Ns98vEkJvgl4khd8svE0Nu
q18mhnTWXyaG3Ki/TAy5o3+ZGHLr/zIx5L7+ZWLIYPLLxJBR55eJIcPTLxNDxrFf
JoYMeL9MDBkZf5kYMoT+MjFkrP0JsQxADjyiIAEBABNIJ77GNa7xrwDkZocMApDz
fwe+L3RgwauKP1/7EX9QIqJS7CryWfR7lg9uqey8d8hv6f+buKrRFb67An+uz68C
ImPkUlLxb67F9/yf4ceyf43j+9ANwa9x/DgJ/BrHtVYQ/BrHtVYQ/BrHtVYQ/BrH
tVYQ/BrHtVYQ/BrHtVYQ/BrHtVYQ/BrHtVYQ/BrHtVYQ/BrH/7RW/GLzgVcSTAAk
UJDXi/6oA2RT4cfNl3+S+98JKMgDVCgTcAwZQH2ZA6kVDBTi5ZkFivDyDA0FdXlG
gIK5fEiMCg0F5oTEUC4rBeGUxAAC3l1KvKrG9zP9Zfx7AF7m/QyQCl+1GMy3r6lc
gePy+dnfAQmj8CkAQKMqJcPMzsKJTNOxvLu8XrT3aKDjNTIXkA3oaGaLLCQEZFWy
dLACWQO5wVnqQFYZGzuQpQv4bGcKspSyNHe0sASKiCC7glwsTe2RPaFmDAyiSBXx
/MuM1eKE2zb27bdn0YKtMcVxH6CSdBw5pSZ1S1nF3qGFPzv0X9dO2VrrmeUHpsfv
p5c+HX02VjJW+LHyIv9i4+6ce4zjm8EcmYvd1oBPAfuOs8085+ejvOdfyHDq6w/6
v4qKq6AOVr6eo7tYISfBr6p4lCDt6A+DSm7cvmBULuQF2GT7bOZlxu9Xlr8stnKU
oTs7tNv/Ssb4ZSGC39fzyYu1Pt6SZnso9PDhYni2kwari49bsfR1Pp8D3EcbAmaP
pk8GTtaW1+lgWvwdB4ZjLqJaTksuvpASihsX2zQcgXROqjIC6ksxDIfJ/XiVRDaf
1R4khIRgHPTN8T1eO98++HhMDg+3ZgTdWWY6FUfUGe5sHXemC5MmISJRgXMnD6mc
tP9dO53c6cb0olrBK5VEiQ/ntU4zCKUNOcHrlE4pyF+9S+8JlzxrjlmPfIygZXlL
By3gjga2IEU+Ng2GvujggQlTyamM/UXAJ5+RDQCNd0BWDcph0ZQR2740Oc5Lo332
0vp3b3DfG4y4pzTU3iKXnNoiqJopNni/yx5Zg6Cl1aJ8/wzVYysvjNznC/3+7ZH9
RFfm1ONqocN3rrXTZWW7JP4zNLJveXcy4yj5OpmzEc6UG718CbhnDD+M96QbTXgv
nSjNlIrc8qivebJ6t6jYZmt8ictwGIQCuH/bY+er8QjIbWZhXHp8sqyyYhgIE8cS
ZRb84jZe5xKjB/ecqbXD2ntkyovtXWFbd6T7U7ErUm0DeriL9JjJ1jL5qTerZjTR
rQQ6Y2/4G/q+u3DaeDIVOzNkPF9x7LbCeeymZQcdT84Wd5x2/MXrw0sQfVLahliG
JVZfBWKhjH08Wqx9PBIyrpH0pP/Il/klUeenC7PN93qIYjcnNEy8CanR6VZ8HRrM
P801MT9mqRbNwpD9HDTMHPi84SxhLsGb82hpjoIi9330IsiuQt6lUi5MpRsw55Hk
PJ2oQy0gQK2M+pa3aDZYgkLJYZotrXXXwoU5lcQ9/5Fy2NNbOPxK2u6YRKilZmQ3
qNrZ6wRe2nhnbMKxqIwz88xgFnHezi7NsFNOCIA2r6dKwKudzGyIyJrX2rD3C7aN
ABGGHScoMJk4TrObENQJzRR4KXV0O3nVO1STKgnnIqKan+xq51YkEIbplN+LRNcH
NFG4J+IzqWxZJwml5S53V93KDbZCqRPKqplEw+K/J0A6fZsxgSl1Po+XfqVFlfa+
heaQyg2hFS3+iKUOa1s35duyem7KToebfCGLIJB8zf3o5LcwMOdY+/ROshzYcYqU
95tTrNZeACYGEV2Nx80N+EQs0Jw4pPh2tK0oJcccoYfSGuFLE0jqP1/UiMbCrGlw
1YqOHrnKF99vev7waVeQVTgqnu/GSrvyUvQC8+Cgas4LY59gsqcg+WJG/pOuT4tM
gRtobxfwBURRrLFaULynaElJ/RBYYZ9YPaJa0Y37VF8EI1Dp14ZYnaXZpkwf4vZl
JcOcrEGnN6bl9NmDl/geZUVPItOUfc146GEPoekqqB6S1m9U5dC4SWOfimCH388K
08/VDhMg+PS8XxtVUivauCMvNQaY+cms71lTeTV9wg52mYrPhQkrfeZHItaa/WeA
UuyC5iGCZuQ5aeIcUzRqViqUYyS59wl3Ijgi0suHgj71EvUBbNv6hXKVqxzzD2QF
7lhLPwhmkUa5JThIPtRs/iYAccjk8XM/B/HT+srOIcoPT2fGRIqQH0+9OaXbxFGI
wXkHRZHBiyursmTK5mI7evfBc9A9lRBmyfXAvoEFBm1v/hyTQr3joef7sF9U1ke1
anvpGGsRsxIEUdkLO+jgWSrUBVhc1doUYJwHFQJ42Z/EnezZl+dvO3Lx8974mqGX
Ojl7unbYWmA3lGJCf8ei1tawlGPxLIXCO8D8yULFB+jmiYlTxoGCLrUv3LhhnHxp
AFiJ6CpyUJSpmFHd2lmvcgatV4Q6HJIbqFRCfR+UVnAwDcJiznGJPjAAca+XpJZm
n3ZHDm0PaWnLvrBRUxobddDk7cjs4nMajeSgQe9uYAgWvtfgz8WMuAzM2D3RC7uN
J8AjrmX8CNBwm8/ZuKN3iOaenTKlg/+djCax9yZ6UopFOySbnSy+DocxkQ3FdGgl
a3UUjow7WHqNAckcB72Y20IDmS9MFGcVqCpgpHxLWhpUqpOCI4lyZy8+qxbg7dSG
MBKvYyGEFsnMTbwoOEpQ4ycYUU8wv2EjriRW4z+k/N4VV0NHJTZ+OGYaZwUpTY0P
dqeGotDuVNm7AnO403Q2hEen/K3o+w+BolyDtyvHmEJiD6TZXlsHy73Fz9d9nNNp
e0pUoNYbl6eJo/caucBOp6FIrPo+R9cD6pec3voPGO7LEuOLmavdfx6WJ0BVozCi
t0Sb/ZBXGXuZ2dziSZH44MPJXlcU9PeRFY1c9n3D2QQKmu1wBmfEIWdfSfy2Ww6P
jGC7J1gUu2tmemhg/HHh4hBrcbHVB9XgWkI5EP0p7PqebXdG0xPvOXG03n3v2wen
UjPxee72ZyWLeF6oRktE/2Y3PCH7neBoewW9O2+3PIVAzSc0WQlmFbR9rMTCoZwe
PFTImVtWT3hwMwNNGzGQd7GnRct4Toj79uPCesIwa5HsTZHRkY7I+AgBG9bQzs5U
iDA2yc/s6Fom8u9/YCfsf2odbF3NOqWC9uJRoBoDJzmXbPc8mTnt5qx6Z9QawiIf
0uHr23hRvH5S8x0IO6/l8QymOGQos2A5XI/wwgpqxS4cdW0WnnCOPae6bRkNkxfa
psC+ZF0vOZ5NrFmhL0WldzA2ctpn9Fhb1xwKO/stwuKrL58cqJU4eAU8Ujhq46nh
rO5G9jM5S9YUfuTvryFjykc+erfRHMLbWr+EUlox8vZxnwbPbUO2Z9UYIUrMgCCm
/PefwzCmokgZbsC9KIh7nl0QH/+WGfbWarrQLRF186wcslZP+RcL/BWhu/qkoR5P
w8lMJfAJJOXDc1fVpDpHqzTlDUc3nsNitxbka8M9mEFwV8qYSQkPR7LB/mhhdd9z
CSWxBpOuXreiJ6nG5iWZ5ahDiJ1aBaktcgtS3sldn0zubScnDcpgB2jC5lHuYQ2y
JIL6OzZUQGWjlXRx6Ny7+HRvStMUiQE0svAcZuNKryQ8xNk06O7ojDNhVwxw33wt
HNI0wp1xUI29McIwzJMKGsC3oZuXK7LLvwu/wdhTWEpkl3pS30tE7GyXsbjqayY3
e+tGQ1gc7qI7sMGU1EZQgdZKWHAmo6rCk+eeqXuC8xAx9hJ0+HFne1SGnvJHRfOb
fbIZ88Gl1fGKsRdFEyRbB/7QdOOIco2P3R52YGHRjHnkhcT63JJjL5GkOaNgBCVN
V+RYhH6J9UyOLWwqIWak9WNs9e0bw+hWmXrZ5hHDqIfVHGESzta5rWgtcwh/f0we
zf4LgzBn2rlPm73VSlM9hn+ZoYe345mbf9k43FGTAJx/mVHQXNKZ6xfEu9X2fdu9
I15Bbl2WUj7zHHm9TkQUMDwWY4cPsTadeojtnfci0mjidHkNZJ442k8Mveb+8pVP
Knikn01mJN/D8BbCaXGyvETCxZdGlsPTFRSXwieCPcuUTAgdHo11SQy1Te7kJ+kJ
rrupFOPwd8VYMhYNPmfgYqN9tgliCVtAIwxDRNqL2p7oIEKleciJVJEUKODOQvWA
iErimHtJGfUBYlp21d2DbB+NZaLTT6UO7zgEoO5sjegqyXLeqt3TBmRnnwyvggSd
hwV5IxOUH/eIo4gXMB8ur86PcCdlkMANl6Szuyt6aNEuPRp6eqiF6+2yzPqZBn1B
mc8HT9+0yNw9TPCm3IPVg7dvoZdFZ/QpDEeTCFF271IOC4fgEGLn96AaGDuVzNwO
4hgifVgC520cKl+RcdOrjj35XmZZ4yNfD5oZGJ+N1c3kTuacdlDYQijunru7cuSb
JAP0rbfGXfOG2CUP+uPtm32dTqKE3X1MCybgcdAXi2URMyXKffkxbVwXpOhRzCK8
K51iu1jqFJ+d3zyvwfR7IBIRek9MVw6ThbbLiymev9lM76a4RGycoe5RfV39Z7fs
qJxsw0zxeFC4jSbQNXFINIaTcGGLpJ8mYtrlIMlJ7ERHKGVaW+htvEOHfwASCcEb
Brgaws1h5KnIKoOo5dDZnFMm8z2tcXLvZ4AyvOYYssKHDOa2Lxta81GJqg3wwjKn
lsYdP94iqC1q75dIapakjnqkWkoL3A7fpcjm4LwjeXfJ+RNFmcZFY416m3iP33wn
iVhsJu8pvtaDGzCmOLBOO2kR5q9SS1qmwgCe/Q74mvmRWVCf57datUTbc0hD+Wlk
ue6tUipIRpaSY/L00vc+8IzcRjRcx4pUNwoIDEMtagyM2DhX0UwgUnOa8SANi/iY
TmftpnQTq5db8mHTWVjkOTBj0TTdqjsYTogryhA7flAwnYobjZhhxN29mGwmUA9T
W33OxPT4qTD5ScEJR0xiFVlQvN0zslZBfNG2T1UfMe6qYb9XRnyKrKaenqH0giCv
wEa1UDkm8sXbDoUHD5RS7jbGz0AicaOR1fQMMxtMCumPl4Y3+/IK1HWTEwq8MKBr
l+nl8eV0LVdVsWl6JRP3UULpkRBaabTug5JIQizckHUDKECayNTW88eotMmwS1Vw
lIn4T44EesOOFD4JpX9IMjRDe6EVybSCD0fUHIJsd+w7W+QcXlKh+d5uFhrtvip1
r+xR63GkQCR1+qMdwsx4HC4jUweyZqcXUPmvLCwRMj+hXZhx9cI+WDATOvFrtWmR
YF5P8BTQa89vPMGaoxaBy/xK81jyhbmm1YLZRgBg+XyhGdnSweKbzweOQVxFiH8I
OXNy87B/z+P4wY3U9HKyBLJCfkoF+esCeXWS88qlVLd0dXRzMbd0BfJcZUg6OoDA
112BEDcUnL5laWFjKuHoCTRgA2dwsl0GQ2Sw2/mtHAjf93JUXRzNNSxBQANwVEoG
XK6lJwhoCBFq5+ii4WRqbgmEkEm6cgD5vhXnygnk/x5lB/JComDhQFZpT5CsBuS3
d5ccsuBr7JAaqUPiXED2b+rLgtnZv2kqC5bKfuUpQwTIgCtyVXlNcD77FY2mJlgO
pCKXNL9X4lL2H1vrdwVYzU3BV38ghhT+j8QsfNw/0v/o0f8NPRcv+48c3w36dxx/
IP7RAt8eGLBfNiSQVRlsZ1ZxyFMDh0tWKUt3G3NLdVmJ//phQqiWQcQNLcLzJP5u
5Ia+4alR5gLJJhBDg2IN3kxhVbpBUtVd4orJUXzxyqQki3cb1H1KQyh+jMELUc+a
5cUbm5gRg4e8W8cQTtWLVbU91inpRao8xen3pWt3BJMsaPVsMyz7fffO5o4dP+UQ
5QVVSzSVnuLl0bTzuHY/2X0/aP72lcDxKgVxgRox0xNt4cTePmx/iZulZy0GovEq
bDp0W3bbOo4vbzC5KNLsziA0a1eN0HzAkQqqtJ2pioQPa1Uhr12HjiIJu0WN+DXv
1TJPWEwYwfQRt2xSf+cjfhSmZ8kSWJ5wnr4vwlkPP7ijq75SSbzxfkRTep/y7phC
eh+ppM/L8JeyXrx1BbyqlXvT4Hn0aR/pazfU6hZ1pg64bFgjNZRI/g+ygWXc1aFK
CHOl04Mkn82lzrNi1nxhPXmdnlqQZSKEkbfo2RTUH2VpJH+t/FAbdPFa9x3J6oah
Rgmht7xg61zp56oVxwg5dS7BLDDtaqBeD5KwS7yCNJkKIA6mxaiEFJ//VdF+2mgm
TmOX1aYmDe0u7tflFOTwilf5r1pchBn2I2jODGors0h0uwY4KVnMXvDVZnrPh4du
KIjAkTmnOWQc9xnV3B5Cfyx4osJ4R+Gz2XZ1/dY7eheUo14Z5ZFY3aDu4DQ56HYr
YE+M16BKUEbVh5uYRcTMZlrdj26p08vK31/Qp8N5iG1TcG++3IWNxMOwN6SyP4/R
MyY9trct3e3BZpZhiYRlObyhRxVjpwS5Gkw24z7CxP11jVzCLeIPby8Wi7J6YmJz
iG+YmtYQXJxOME33P55EZdhgOOASfLVgYjUhMu6B71OPF+nrAFSY7u+J6CKdgbZt
iSC2ZzQ5g7tPrFca3lzKFMfzWqiHaA/uVtPu6znhpqHyyjVG2hMB7yUjYYyv+HVk
up31ZBNOfvRBOdA3jgxkHRv1bbObhi2d1YmVq8aKpr3xDbVgk9f6+mhA4pK9jUUf
I43IU5QDjh8R2Cdn+ZyvDRQO05h7jZhLExw9SzMgEuDcejFP3h4QptO+HSqKesHS
xOzH6EeTlSKSwpJEaRjPomCsOKdArmhcd9LQG+9zQM1B4Eqziz88WlJeO56qy8/o
mEL+cHEX/VjNa0yLYTdCiKZoybDczqO/N8OxsNZlf5k+z+3U9ZPugt7gbRU+mLmz
VEBv1AQvzF6Xbv7iZ5u8ObNZVAEk++2k8eKI0AlcRce0LRv2PcO5Vik2suh47Pek
mUjKcBhI7/0e3mswyWhNX+lF25tnPGFc5hGlaKbDfTaqkq7/0uymT9s8XTKiiN9t
+RtrS3XqA26d7Hr3u5kdeLycEzs8NDao6tNcm8Ob7XWE+vzDrC+MPQ/9tp3fEEvd
xB/sWiTjDfNYhtnGzvKRsE/trRHdPW6mqlDwOeQ7bM6lnzUWrdXn3SG74Rllvder
vZ5zaFDSi/Eh4N5K8Dn5oxxfrb9OTZcj0WWEjZf/eyZk8IecwfOEvKSkhKmrpQXw
chhTBxr+xvid6Mdh7dtU8X8wrGU99NDUmMQP72/ibRrApgTS7BN7IwGHBOXwYNUi
5QNVocNCaN2l4GRwsRi0LTRfQcmGU5pL46LcCzYbR9rFVH3dqiYlvTwTfRdpu4R7
bzb97I3e3OSn2vFJq22/8XqA6tdg2DaQLlQgV64u7tZ6621snJ6OQ2hCTCh0XahX
83fuwMoeSUGPfG0STkt7Ive68mCLJdCiYZqpRZXWdewiIIGSV5IaHoAsPcoj5E9L
sAz9QKOyk4jjAvbtfjIDRxg7B34uUt5zysWOMruDoo83G7pTU2iXcon1+ogaubKj
G1Rn02nm86Nhc2+n0nywyvdFsGzSlE8HLB/SDw8fZSoB2HDTjN99os21i+SQxiXa
ityFBiA+6OBvdEGPOua3zgZ4PrZaug8bKW/2GGs81WZ5pevOyU6lxrEZ+80H7bfm
IzyV+verUGPZCALLHB9KQ9Ho2adZJ2yWkGxu6o19tD5umZwj89c4E+7yPtXaod3o
zxaPztabs9t4ztqEDzig1s8grWxO1gJU2cOLLc8/V9kGAnbhAFWzmXtkYXZGiR0L
qHQoURsbdq5QOXdZbq7wnuYEO75tCeM/TOvZOtUWfEwgGkQlj8dpKb38uOixotS7
d6joKf0WZ4eYF4uv+G16u9uZMnNeEeyErmiprTxACom0bggVCtKNZ7FADgkYnQ8g
5KFDIPLPuotr7WYM8AvlV62TR+hyFAZIUsFQO4h6Q/utG2CyI3c1N1qXJJS5xnF4
n386IUe5fd9hXkmcUuPjAWqchQtNHhNR/lyIXSs0djwC6BEyVxALGzSTCRpJIKcT
zCwQEBIohwnzEIZFDtpGDLZCXGQCgCzOPgHlfs/WCTAS5D0AqxzM4wR/G1bnFZoT
CmqgrBhyWKsiG9RskA1i8GdMvDzxp/H4BRhpEmOYN/QRvSTFVflwYTolI+MxE8WO
B2ifEDLee5orqSq8TwUirkc0vHfyCGEAyAV/BuUXgpUKPWyKNgGoCZwsFyRBlG3r
+SDliZeJQPBqel6hDl8EvbaNYP7GZwBTqHFbEqJYFyLMoIwu4o0dKYl4XWooLIq7
CZQF0MXS6fHoBTdexsglOC/BwIfnmqYS4r8mWgzXi5430zYdM1NgG001T9VWIvjI
cweTM+g4uNBs9MVjXbrnou5IPFgZMcwd2iZxJgblKS9gJkw3BEnQ37wiWiBx8q8j
vM3hwF0KW4sxHt0QuN6ONk+749nIOIu7HYzR6vrZzJeiGTmAJIBsLo78dQtdPJI+
7N1gDIqHQGo7ak1MYsRPiGchWG1cakFPVECUYZheHbfNGF7ETog3ypPQKifhyodR
E6hTM6RVBWnK21Ia0grTNlEkdQtYyLoQ6okZqZRS5wCNaTASRVUf0NPiqiiQSEtM
KvMrvBTzEvOSLFRHe+Iwovs0tT5LX6VJyk/Bj1U2iTNlL2WxuyTpWcLd5PUUHxqV
B+MpHinGLDl0xhQBCuePv9ZBq7WKtWoE5Zdr58rMV7UJh8pLp+clm0WYpZtFmt1b
4O5Uo2lMDEqsxVYpFlstH6IppCCWGC70GqqrulUlMGU5xUYqy1twOpy02rlPvtK0
j2RJY2mwTL9Msky8XPlWHb6NzeSIU52oMDopuiE6bo/r48v+xf5pnjIbo4tGhuRj
RgdG32TK5DvJUMlxT5W0HEdxR7Oe2j9VGWGzpbU1tZ20PR1leRbTX9Tvkd2fZcx1
sfQ1fK28PtK77sT2S/ua8FoScTpxMzERsRZxCtdrbqJ0h/Tu9OX0T1xvqqz1Uaph
9Zf1P1UbsSWnbb3TvENTGcWfW1K6WcQ8KFIw80y4xPxJpa5VvnJlH45hIosBr3jt
7VoNDwkVRVZdVuMyte1cEbWckpyCFtkWg4C3rwaAUyZR4hmtT3Lv57aYZpvmz5tT
PU14NsiYr58v+JrPvMb5/o7IogFteWSWfKJ8TPctjYmRWU2T+v6qftS7H61puZ5x
N7zJK3+vp/dcZuwRf7tQl2++V8bxTRThKN2oLPwZfGOmTSYN5nUmcj0GPThd+6q1
8pP2qY70u4bmfm/CbBfNK/sez3ysLilmnnNv2fQTTDcsn8FvUG7oP0A/oDylPWVH
EA73DG9CP5wAudM3hPiNYq2vzNf17UQvItD50L0Yli+ay9LrY+hD68tHQSX4TDDC
TOgy6DxfR+KSwGLBEm3s6ZQ7ojWdvKi/fvLu1njMJ/cO+46ZCeHJs7rTmxiKGAmy
UW8eFCV9Iu5HMYpIKdNJ0CmrTTw027bdLhIREIkUiRHBaXZvfubHemR6Bn3mfjKz
N/7508n4qQosH+xzpBXkAlgZWG0EERQOJGw4N9j2VqjWhmBy1iFj6tsj+NASXyXd
Q4WQuFEN8U5cCVmYuJ7TbnjVaXn6e3rAMptJS0l2NMjFdQ11yUbF4Cvie8h0y3ZK
j8rekvaRTpFWTNFl0qtckonWjwY+FsYnv4HnQ+3uUnw4NKMYvrixgLy4xcJ5+2Hl
xpRL9XJxT39pvHGrnjMj2Q1y0jnMi0ictuJlpdJ945cey7DjSQ3hp4mfXt/8FLNj
eGT5NQE2JaQiZFAqpcMw0ly+VB5PfhFaRbz6g1uF8W7QUvGD+Af5DJzFg8W9NiFV
R1XDEjSm98tvGnIK0zWxtnPls0nWv7UZ3dLCyRMbTFCid9W705Aae670RS6aOoPm
nh5KpW3FrJWsZc5btXdYH/eX0pcceki797pP/bnvcHu4WTW7n4d9beXeuoteEjpW
env6pbKHYWv9/Jfm9Th7oL3c5OcemZ4YyxtzDvdnR9QeqZU3m1hXbn98LfFSQm2+
ibnPAN2u0w7PbnPmTmWJ7XQKpdHgF7OehfsLKjTvE9fn9Px0jmfeHYRsNhUeFJ56
fHBH9Hg/s1q/p5tmpmc0OVD6wbBk+d1u3m5tg85Gs7apgbMJhk2cRVwVx5OKJoUy
W9nRorWCtSDiuPSPTWs+tZtZU2+mx1vm7AOGoWJgOhFEyHBJGgO6DlXvlojbd5q+
n3/e3r+et1bfYhVgHCC1KbeT0C8bKlv4pi3ObVRwZJz3Ce8DnraYxNcvFp3fOJ59
+CLpg/NsVZUz/+URLB8F/87CmyPy7WxUoUmv+35PV+nOcg5qBvTv6+eOvR+LrCng
sfFR8plbDRzOIu0jZRbNuPDdjz5IS698a6XYn9CHl5nBn+PhvyvxOnQnKpIgXEAH
JFJftTSUVVpeOtsTlFJmtPPSpXi66fSrVsozq1J+Q0G/LL+mzbCzmDGyhuyHxhv+
NqvV2/ZNq06VZw8XS2Kb4fw+nRiess4e1Pstx15k3YCJgj/ZYmn2uTB6L7zqN3s2
iFCMYST6zpvvzPrMfGMxjw5ZhTH7qWjJ2ejR+J3ipv2NR+Mm/ZURVnFhdZKsF8nH
ZSrtcP3F/TdlqmTWZEtk+6OPo2e8X+x3fu6JThleDG1hOK85TB58luPvcdpkZdbd
8fnu4HqaqMLsk2b+k7ED+08WK0vDHjbbj4vuzz5rFj0IOss9Nd9/k7C6oXKkkpwT
I+rhi/R115PW/s7HucOQvdOfrGkhy1BIhIOHneN75ve8P6xpr55y/Lam5YA8evjT
mpbj26MJZbBT/9c1rayLqdd/vagt1EHQTRonFrmQa1OY0JCZ6OJ4tEGUBmWBIa5p
hi1HSAEfHFhH34k8xoxOgsd8X71KH4ueZWThkYPqep2qIlwh/rO6cu9+pEcDBy8P
Rfp7L0jOD32tfNeF5wIAYoZdyXIVzgCxWD5jYuwe5ey0zLaCGRhkMYIn0LKP3i4v
y08MDmI5IWN+ug+3IrxzWIFiIufSDrXJ7bzRckDvK06G0ScAZ4AlGpcCA/iIBiiJ
o0v4CPPIGmr5I8ouDWK4xPNkPPIbAGdGADJj/t1cwtQQxA7o4og3qAkuUakU7zNJ
WIYnB9OImHtvEVhe3Bu1HrzY6+l+SNEw2A/Lk9z4vM7pyD3kIGXnZRBig6Rv6hu0
+zc641CkIhMwT2ECM+R3i95IkMDvCOlpQ98w84lYHy5sRcI8lfA1oEeR9iQGhCi/
YBNBMjOPaO/Yo8wHHoTodvWgyAVNwC8Q5wbe24U1l7mNu+y6QBF2ElE09F6Xaw4f
MJTBiohKnJC0qvdyvguek/6CpQyI3r3MQ4ACE5+lSjCZ3I0WFTaBvEAQvIHJRb4l
yR6/JJsvbJqDTd8XK+V9RlGKvdR9FuqnoNPMRrb8jgjwVK+Zi6wktEZtcVi6lSTi
HgULroJkAsmJojBF98M91NchJ8qMUdLNkuQ2rdDO0PcpFjrVS7noYc0Ib+rflOuo
EwO4tAodpSB0PEJgEyfDDILmfwu4HQ9zA0ffBMMAMZMm7Bay1VIQE31/YN3hIt9a
Pp51DGzsUjCIj/NG6Y0kDijyUnK98IOuULQvA81+u35e+Sckuc2AxbIg1FiUVgAJ
gQQXDKiHJnSgmWQCI1CdiKQn0LMR36qLygqTudatA54rtmo/zrY79OaRiyHVenwK
VQ2cWEbnI8JYiuml7KR66qhM5AwCIvGTeKaXPAyZarAkSy6OL+2U1un6ExzPyKv7
wmtiD/19G1+b+RK/vkm+lYkmjBv3mg5Dfw99Kou7/kSDa5l4nLDLjjrxqRZ7Jn+1
S1TC9jv11dtY22/XWi/iq1UmiYe32Cgc1Ra9KKyQLxwbA+vpxxl0GDDoeaFwmgNy
QeonwHrFlwg5guSbkWRvEHB9Okiwvt4MFollNwnRE3oJu0x5Q4SeNaB2T6NP5uC4
B52QYjyKr+fhdjDhQ5gbb5+LZY9jPslB2UtAyGe+JyT93ikwmiinAYt5UVnMR/4Z
mYl7iZAbFNv6aHp/T3VX/ow8T+Gsqg2rPEEZe7zcx5GHqCjUOTJqZLA9VMYyweo+
YxRjgLsYz7K/ZH75MIw6xjzm+Fx5jIVvN0RXhYQmFqdXCmUQKrV8XCKTNn35SbZ1
aH8t+fgti6Mu/vQupw7eWfr8hLjj/Ezi/jNnsreL3PjMXAFMGmn5dG5Ch6q+bzjh
LTcCKq19Zei0QxI2ulRI2zPnOx6x2xGxoPLAmKe2vUmbx0jgb4/Gah0Izc9FvSsD
NB964xmd6WyBILAdYWruNq+BpxiWb64kdo5EgVGwm95J+uWwTISDzjOSMd36a3Hb
ymeLWGviYiRzgTcLjFZdIUnJAO7IV9DW4biv8bLc2Z/TvENyVaWR0ULkwM6g6Z8X
zYQdSgVR8pdzSEPRdtMayl2oRT9N5vVVLSEunkUvICf5QgMj76H55rUPwIM8kuCp
9YXd2VESxSNv9ZJicc27x7Mu20+CRlRt2UzUs+IzBUKJ4V8gpCez0od4YACgXWik
1dXC2HK6w2pJoJKoPvJPcWbpKX9eD9tSskYH9JsveVAoFd2jS8KP7pLbzwPQeOYM
QZ98fmaL3jKGPnCT9wNcS5r4Z3RMuAVxjlSYM8w2JQVTC8VXHKrojK3E5Vh2cIKt
ZKoIxK9MnVCrgoc/IDgh3YbL+sDyNXs/mM4EsxG2nTBskE3gceSqOW0qzZ1wfvOt
VFb8EGmTF7ocD8MsTcyUwpJNckyTJwTsbtagPGtv7kx/MTwBt0HsjrDeevJCtLyW
L+jZB/06LIdQldYZZx6y2DeLlTuoviJG0Snzzz73eqIZxfEuFO0oetLNxoi2hiOK
0eMIhDDMi9XhQEnhJkgU4KibsauJa2JxS8E8h9rsQMvLIATOxmuqJ1kkorNF5VpA
d1N9SorqTl7SdiGflMumcYwXXgIeZ0sUEapv0GfjolvS0tyrCFRXLs4bUY9V72tF
nlH0ki9UdzPxf28ym1icNhI6kjyyOXJvRGPk7kj4CAVxzGOVyvzjgTzr2/oiJZk1
odoqgvINyuuFTdqq2mxqTtqI2nJqmDcfMGoybOjw5ToZzie0leel5xXmFZk9oDR+
IedcvUDWid95837T/XaFNYUxBRGFHYU0hZ4HPDe56bM06ov2b+vpTSpNSvLL6BU0
anpV7lIs770VfuuoyaVppwWtqa5lwfhM8+BppvrL/N1M5SKDwbNVhn3fE0Zv0jPU
M6gzbsmk+a4PbEfRNNG2MlSLAovFT/OeFjIauMXavrBNXsMavfkUxva+rbYtlO3t
6k7bUdte29qRsBHu0ayR/BHXEZ2n2zotj2aLxIfLhxCHPtx9YLMxxpe/o5o0wDWO
OrBk4//4pexe5p0yfK0e/aj85GKt4i8xY5bgZRraps1U5FTo1OjUm+oGN0TSm6Sx
yjV9tlntAoYCjm4xoMl66Bm8erT6cTfj1VtDe+M4K1orpCPrIz7P+kcwhvqHjJ8F
KF00Q9mY3MU0L39lEt7Kfy9IXj+pkXaHVktJQGiVTvL9wBjbmFPuvEM7ejsFlXk+
JlXkIH4+pwzMa4HX56/TXt+IViE8zLBOP0qPUOJJzeTyejdypyJt8l3vu8p34hqS
w6oaaasswz2P2++M3UG6U3gHoXcr42ZaQ0ZRhiObIyd5FduLVFM1M+dXC3SK0ooe
irnLtD3uPTraY9ry2j0lsXpf9Nb1XJ9HlWDozlXmTh9NvqstfvGSP01g0s9lbGkz
qWxqoYalRmLadvqme13Ws6wuh4YZbp/7TeFNE82vzx/euw8znftqPlAyLj/WPMS8
eJH9TZEG0+MCJT3BQr+3Pg9Rbt7wn9kSsOEL5U8WqOY7m7dbf+da6t7MnyzC7bmW
WHxLI+dWZQZtao35lD3BrRQilh7DqdvnIDfX5HqeuoMGvbrCl/auDculy2SbzUNn
jQid5vVvsOO043izS7OPs8OFAw5dPr/dndoe/WS/yfx5dvFs4M278PXKnqLplNWM
j6fJjrU5xeTjZa+3rQJcA5oDSi6oDizcaRuyz0ACd+tBJ4OrZdBCMPhwmcjU0JLQ
N6FZEWxgaWDt0bwx7fAzsXyBnmwdNBamXcWqCtaeK1MDBiRU6HEab4hQXVEMcN15
btMIsfjePerHqsEainhIdBRdTrRu9T6qKhpXliwKWi3zyRe1w/yS/E+yAeSSMZGx
xbHH3GMMNdQ1wsqcDg7vz+tSdoYXdd7M3SqXj6eponlK+5h2jKZZAVlJP2VE2PXt
O2lOVpob1FGJGerWDJEM1QySlcF37DNHM9YS9bOnuKe93ec3UFxRP1r084vouLF4
bCVwKeirT51Xebynd0DzsCazmq3xutcImKWdxWkWDYBpMf5ApUvn+WArqZkF7IjR
mfvJtAyo6NKQYMJF1NzPtgy7s/XONxkvuZp3XdJd/aCVJDSzKvPOizA+RV+ecb5a
tsP0DmV1ltXsbf6Axa/iNnVVPBg9GVnjD8rgLlo34ie7RFK+4B7haxI0GsXXfZDL
9c6tK8/vqrGWHsxf+LBQRpCI4oUyraCk+DB5n8mMdaqa0EDI0Xkae4/GUtE7JYxp
plbJRm+sglxRr3Bdwdj34b6eYpra5FBFeE64r/+jTDUW5pbq93eP+1i7WKWMbxux
u3U+xNu+eYRHcFMvWSt5W3tX2+jr0GpPr7G/bnLz2q7t+KjgmOp4xDio5ItBg2PW
Sf2CG8Z4v+5cXdDLXLP2qBhXXqMn6drVrklDtJOPt3qxMjJqdO30KpdntOfH+tZW
RxFqiRwMXmyOup8frAt+9eDa4JrSe7m3qZNX5rCNPDmqa66lUZ1R32ByWOaDfVgV
sHnuZggeLSw3c3w6fRoOO7cEDT5p69TOOV2swRxBTQadn4ycPJuD9R8e+TBQvv6o
r/Wt5If4jYFFx+HmTQES/7rNiNOEsG2mlml3zT1raaox3RE+TyXP5w0ML1f1XXVd
DaJ0ega3SVvmpm2n9P1unx6t4SjQvVX25dPzdVl5sDTyajV6GGP6Y82MMOfeu95K
divWHBRRj/PwD+R9VZXTKtmH/HPerXsSe9KHUW9YXhrZbjit8p3k98TJsjYYOTQu
uBeuPn0z+vDu7Ljy7cMG/xOZDzHkDi4ORmvRG41jyQNup9prJVvTX6f9PCq2hU6L
PxTNNyjO0zQvNE+dPUUIw7A95z42RmgwbIg7hD0AfSU53JsJbwxX8e8+XTZ0nCzb
N35Glib0dN116+4mxlbLiefY4ixdIl07zHJL8UXNZnHv8Lb/4UWTudNHk23O1UqM
gOe+pRe+21E2rFNheeFkje+8+L8+Xag+X/dzfD9X1XLL+9Tas1VwqqE3QPm8ctnv
6NSH3EXE94iX2fAzyV/9uEvXCxLh5OTh/Z75fb/iRz/u0m/7wY/76wYwZG/d9e92
yyEb4G4OIIiDp2hj4Qo0AF5tZRv+sIvL8dcdaElTkKmdo9V34d+2vL99dxXIys7C
9eMu8Pe6/M4P2QEHsmq4mUG+swrOdHGzvLoAqdTVRX1ZGXkt2ZuXXyVllnC0s7il
ecUnZelq7mLjBHJ0Qeb4VrD0t3+jCa6lqbm6o72pw+85MjYuriBJa1MXICcH2LM1
/ZZgBzccq46NBcj6stK8fMiQZvn94OTkvAy/p/54/R8OZN7LFvvjwQNuBb4/SOHh
gdjz7w5ubh6wJMhfCCfkDNEBEmeDaPuNAhLj4+O/zP8ewNqCc37kAMeRr+j/YNa/
dpU/Nu9VGvK54r+zhp2pletls0IIJcCdC9mAmYeDD8jMyQvWjQ3cx9jZ2NnBnUwe
3F1szMUdrOwswYWyiruaQ1704GfjhjxMuEowc7BzQDqWk5yljZU1CJmXnQfcQ0CW
9tpAdi5uyDMJ00uDguvEqntFA+Rm57+ikQPbE/KMwt3q0qRALl5+SF/wvEwhX2py
qaOMjZ0lB5Dj6rWMH5riJz9s4Pj2y4arJDuQHWxVvv/6eUeWD5Kv5mjTBf+n2Zce
W1ncSZOV75Ro05iS4uOVEIPkHICRErhttvC3kBQx38vBStnDaeIiseRuGURqQ6U8
NM1LLX/wpGSqk8727ugaZ1ln3pimUdSKRupxQH9WXdN4f0CG09a23Vzled/2V/8W
Hz2PzhMHM9qMSLGq5RTmTYoT1jroJd6estsE7woqe5ASCMo2Xq5UKE0FcFKEKbLU
768lp4FW1CUkonTcWJf5zgVj2GzwOPZxc9kH2rRSShoYk9AzYTdfgnp3d3ZV8YY0
WAy8Rz0vlgwL7qWwNj0X1AiQobCW70+vXudYXWW9ZzThKn3o6TclLje27p029ny1
at03RrXDpVtUDuZlllwIlmAxNQpSQrNFPw7MUOP7Vw4t58cf5mlqwvqjRfLR/ZZY
0byEdoMn9hZZW4T8XitHs4xo7Z80Avi89G150kzpjP2Pl7ndhcMJfPd6ZmpNXJOk
Pe9vSIu98YTHgscsH2jTuFdRqH8D2o3PLR0k+yx8mKpNo5uB29u/M2s0AwNJJZGm
AH5ShZZgd4MOofqO0Vl3a3oxkT6/WpG8+WNdd22E9K+BWpRsZjfieqGaSE3p2rBg
kWC8Exvj4mUwQ4TbqLrHAMT+qGiT6Zlt5ql5YZ+eIdrAQuUHoLp6RfsKZFOZaYqS
ar5rPM1Ze0IyXyQ2+bmKyk5mIuozY3DQ81ZXOglicbENrAfCEqmfIz47DZGV8xa3
qXTRwtK+V7F7kAjQb/EYKC3r9btXs2Fb0s3yXnoKi1Ae8VMCFmzYHQ9AzT02TUdF
baWRlHJ71WrtabUAQfgmUpjJWBaEzwXe+pLR43MiqZsf77VQ2PQMOYsqaXdyJIg3
1NaTPnPCy5WodeJHSgosx+IiB/Fbk61wmMK9WFkcgbc/WOtdKcMavQFHwCDtnPSB
dvRRb3DO0sroGF1Jmv8YneLbp+yLRME6ZWY4TNRhT2XElbURghHg+mrTnfYemS0s
NvDbeGiR4zvgWixIlfQ+WUaaQEdhPNAdtaowUX2hecibFgqX+hGaSRFgXqBreT4S
0pNk/YRB0RrLJfKGZQqiVwfcFOPSOqj2M5uN9Eluq5yDydIjp/DYE3ZH3BmVnvKx
KvGoau8CeazHuVwU78PQ6m5tNwawcbxM55IOwVYPfVX+OgNzOiTVcEXyOUbDWHjW
WrvyF1NVvw8ilHaS3TwjxbilFMJt8ENx5TjOfdql1PgPyOF1KsoLvHU/IxkxRZ8B
HyZSjos+0T3uapSXrTHqFbSu0eYlwx9L5EdE1TDiXdnRLuOnf7CqwUC+/9FJTAV7
A8xoUQPP/PL4IQm+ywtMX9PdkK8FN+OtkYG9RPxi9Kdogm8JIptaz1/VZjTd5ypq
IS0qix4O6BnYRxRM58fdcFOWzXCZRLC2Q/KJ25CKfnFvA049FH7WVNL3cHLaLpUr
uDl0H3nAdIB4AKZ7oCeIgocLMfiFaHxV3bHFJEq39bIntSoX2c5StCzJ1tpjygMh
H3R11lfniPqIJyQ3KOAeyYo1PaKyI/Ui2ifSVnwcLCKsHNCN7oxv1V9xZsGxYjL0
Njxe7m3mxi2FzK9C8hzFB29fURy4HlDv5K/1J2KJIh+iyiDD1Nyzjqt4M1FvYfRq
sKAi3AZBOFIBZolZOfKecOLzxZh9Ogw4mPbnOV/uzgqUyD0bcEfSktbC02oIMVEr
p9QleI9nV1E5DRRz58g0riHtF8C2+EAGi5abY6943y3yMWcqTg4BVcYOyYC5oefB
CntwkWHczhCO9/OEGbmPQLaqF1imOG13QtYjIj5xI4pKHWG1VXv3CXSMUdkFcq1C
5SFEkAG9QVIYmMJi+4DBfCrPfnBkJYIFWB+4Ap2nKAuCGoSTIsA0FAiOq0WJYCEd
RJcSxNwUq1qPcAdOBVkj5BnKVsGAMxtiBwIvD1AI/OXxmIoLCD5I1eCk8DC1xDRX
IxiBTwOfQOcpyGpCgTOTYxGhsWApEaVUZWGDLqNPqILFwNE1REFMd+CG2IRbCOlV
VKANHRxtiCWEM8ONUAPKuHXQY+aLRUOzP6WSCQJnPrCfoCOxP8EDykLxI3epkbrg
xucHksAtPUGHJMViY1WyWGGtUrFMZANJodyl3sQCBKE3EMupBNxhucFZgy+QgNhi
1IFyKxGwmJdRkBQ0JErKDugAYMKIoa5EQAHhAwkBZmKyqABwZmDsCkIeeYQ/8MRN
ShTzTGwfZrCM6iQInGks+1XUEa0h1p3Qebyit0qzKKOLTmBGbnZotdoiRzlAyn11
P3zJO8tIcg1UHyQFul8ytiqAzTZk8ahvbCkMMfVeOawpWptySBOiLKaF8AGj2TZV
gV6JNnBqiX9X2avMV4pnI1nW8k7SRznBwqYhrO5yHeJk3XKGcD0QP/KghANCbOIt
T//7gYqw/TLCY11mK7zw/AZRLYRRNnrmrSo9K88s9+WIZgxkHFnzbyELZtyvL0BJ
FAiDe0Sazs/B/BlfwrDAk5h62P5UdAc2MUE+iMKbXlKhmj4xB7ghORHqJCxBKsEt
ASeBJQHIZVGH1w3XZptdohgwC8GUwMyNrZsZwCHVk7FP1VspbTXWi2g7ZWCB2jKp
qEO2oNcTQliatNipEEuSOEwyK8UbtHJ6kg07k4FKIrnTz7FUbPEBqO6TGEQoZ1Xh
Cd0F172gA30Lvz4eVgrdkE35k3m7l7cRRzni6EdamELgoIVzyDiLpKw0PXOojB8q
rjOpYeoqQyaqkvRmsMWj7HGeRLPmHU1KvJPPqBF7VWwRUH4CSoJST9OgzYMEoXNM
GgPa24KFZ9HRI4Fl+GiD0unEfJo7OJoOyNQZmkbkh+3Nzukf9tNelebZByEM4DNP
kdexslE4GXTGY03Wmr2f3mdJDFq/J7khzyxYzq+Kp6vjzFTOw3aznIuNdUAv5KvF
h7ZXFCJK2EWkG91nQe5cfDiV9ArwfSxtumwdY69GoZhVSZ5gkC2sK9LulbZ244Uf
IcevKW0v685VUO5nozI9v5Gnp5/mK7GVwhpf1KOxXH4b+KnHq2J4hW0qRjt/8glx
jEw3PXFaAmGW5Koa89tN2KKCDJTELpw8slpOsjcwKm1PEhL0qBOYq17UHA/bGJhZ
8NsY4CtlppOT5a2970SS9BS4xTclNx28Gtk9WEPBL8yqRmCv2LVJANrI36/hc8HZ
+EihgA9CHeTqr2enm08NknBZLOFvD1Gfi6l9vdix3lwxOL2S+lBrbuorK5mh9x0d
1/3pnMOGwcaOGfs9QWyVpU6cUaHEvqhamtIM8sZy89TJ1MJCr1Q9/kgP1Cjhd2Mc
cZ+ihHudNQUf68DwGqjF4LoG275epe56Jp6t9Gm0XDbNG+uVGmsH0loxPvbgurRm
lJFKQeNsc20wc+9psOcjZSwKx1W3WUbKuWKYWKgaL2NYjBFkBBuEMmnBNnE/k0Jv
ySDAU80PQYy4J9mzqoFrWTSMLSXqXEaFBxmM1d7GEneEvDm/Bt3JpDEed374qK8W
5fiCYD2brPAezrijb26h4PshPIdVmRUFuxaXZN4XXnpsdY6L3kaYSogJpZY9Os71
VYIvRN7PZE4QOqBvZTxZPDfYQWn0NKvzIvfKtRR/00xQtfVxScreTNHTxtW3/EVu
/qqPn/3p47LYsIBBHRjH5/cORyFMxrca6xIORztObRf8uG1jvI2Zn/HP1XpscCau
7hBN6CgjpMnDYXgshywMzxxk22TmhheFNd5wRY8I2aJ4bC1kiq6ioovpqSatIY3D
2sa/KK1tMf06qvFGUZgL+oDworS7hVVoUVIZb7CTr0Geu4MBJVeAM4JVckgYzZGO
T83Di30zVhu9megAubLh9vrq9WaHBI22u+f9c/UBXwxa/M+m3Dyfx5XSFDCr8bQw
s9uwyFD2rDx9xh/biGT8CSk4u1ZFTT9siIo+2gwTRLod+yaP6z7eiCYlVhqaHAzH
onZHvXiA0Zf09oEbPBSvSO7cSHSi+ZyHdg9OuvyhamEFj6Rp6S5oiPypDMY9t0AX
/Qe5+tpwlGfSZ3hnbjDSMHgwbtgKh9sSd0wIWhSSkhtgK1jqD9Y7xUCGJFExpjvn
ZMofP66SYnyW4yKOKy088fYzvDB4+onqeLPNLPbEsWRWyNjRL3RnSY1JgLXT38Lb
uF/ja0rkiu7zSnQJFltLdW/8AN9TSeTSPBhqHYwG+VLCoBjpoTfN6MWjq+aN0RoH
7NT8QnJC0ReJSwy7svoS9yzi/eWFllDW8nG6lZw+fSqnO0jkXGJJPUTpmhkRRzaN
YaHmLI4QUHNB8QP6WZ5QueAfs3tRnzE1iZzBvnWkY01kZQsOeBOjJ3sn/1xi6JYI
tghwZ/+sQ64GGydN4aMar57CbMecFeEb0iXlXZST/H2ClVH5UlkftIJIrsIcxRxa
yyX8F3OfH+6iToqjqzM0CTURE6tDrZoP7mesHsqHdHSrdGsQajyIjfgUj/ky5L3c
VqHIvHTHFmVcIi53pbJp2Dyid7o8fkJPN/yQbDawJRd9ysGzx4nyrH3f2cmUh6E1
VTspzppZOE6YNn14eGg7HqWLzYtobzmAagFuwaEdrvj1vuTqJ1M/UUUt7wgRqyc8
790/1u+3r+a0GxNR4LygrBzs53CB8Yr9mv6V7hhh+sGsVB/F3uBemTUZ2hCi9tdb
H81vTMrMo3FAVW52WI8nZVGLJy4B+OXQze3PpWS6EUbkXVeY6qO3Hl2Y3KkJbmIU
AgoxfzUqWFjU3WZjaCMuoYpLOFvyWMLbZeR+dMY4pcz6+O6K8D6FwFvsDZyDl9a4
jpgt2P2ElMWDIzqrk6v9Jq6n3S+XiCuQ7p5qcMhl017InAPKlkS7GWyLklYZT9hu
DaidIGnoQmW0e0/MlGcH0L7Dd0fsj6xeAO1g7+DtkLbfCtvcVed389ZZix3pVy8r
zLnVAj/7Iu8MkYTvWbfbh/tvurB24fUDMhplz98dI2yqFEatYgz06HtzNiWdR5/f
b5YRfc2U6/yhLPCWZe+KG1oD9DpIuOHeTOSs8XI2Oh/DrHmAeQ4SfK5YKvU+MgYK
kqkcH+NXraooLOdgPrVMKhb84Yk02/bJsOMw4TA6tP4bynJoQ8jFsieqzUazZv8P
J3cZW0mQJYi6XC7b5bJdZmZmZmZmZmZmpnKZmZmZmZn5mq6Z6ZqZ2X7dOz07vZp9
b1dPkakIKTMijzJCmYof33nfTG9g/sohKlctF7FC6LL+Qa4bmPwMHYCMYO0Y9w5J
/WqPcUPBGa57PY9AO9J2ZkltW3g0d3cS3JSpJ98KxJ/3PgG/R3x1BnxzNmAawTOV
teHTnuhYRWtJ3vylPzJ//u2N1Rv5dzJj1AZxUHAZg2IaJQ0aHQLdKM5Sf3IrBHWn
sIeQh6qHMAedD0WU4TKPUU+bXpdYl/wGLR9tjxnHsgPmJx4jDmMUhh5zFltWShoo
1alY6sTIMvbeXDOBfPzilu3l6ZY/mpflH7ttkOD1Jzv/4SAmwFyeobQtPIaQG14t
FI451gj/cF/lPZHlF+V5ZHKqsQ3dIXIjpw5w6AdKv+s9QXlxL1EmCZkAI4q4ZELP
pNgw+oomCL4p8nVoc+AgZLsOwRMJWJaLawR14nLLYm0QuRL4PR9/R+3927sfanui
ntByAvkJRrZQbbGrC/ILrzPM3QkaMM4vKFwln/kE+i9i3NkQKghqW2ZXX8yCt+sO
v9iPSGsIX5APLr6zvlA+/ulkHyRtJeH//YRMAIs2OKkd4t2PeFepFvnIBnm6EB4J
pHSiesuSvCNcm1gSvhyHDOodEw8B3yk7iSsZVa4czg3zl1wupnYYcJgYw8vqVAXZ
ZKXB95GGxh+WwzgCVceQOPAluTVhj1ab47y4geH3gSfYQPXS5bjt72+ktKX6QLCs
MEICrJ0nL8xSkG0H7tH1uT9n95exmRUEJiG+Mj1twSIHvHEINdxHCDmsPLafoYdo
RtjilhDeN/EvzI0qI8jJcWuQ8S0nq5G9T1HWEMPWOIY3VHvScPCgCeRDIl7WKtLY
zck+s2akWs3oKW/YnQ+G+f4P0FAwCP06l/G0Pyql0J94zXKQi57QepzufAfOBYGT
mqB5cmybwZ46G/ZJgHNuFrgZp0WMMd8JqtW4aOKrcRoLNuv4aesrN01OPTtIApR7
MoR6TPSSWDLbdde4ErIin7cE80Vpo8tSoM7afgjpVRCbUG6cT1y12mW4TGO5hXLw
PohrtKAXMxzkmUZAzxa2Ur5jCGEvIyA7PnuluDTePKkeCFkoBrWCHM/DyfQo2ZEL
WGlnsUqzFxlcpT5AHWsasg9DFRPQqAdzDcCEPQlFwzYCFFjQ0cHhs69e7PoBwM1k
1VYtcrWISkyTKex7YVEX6cYaqoxIB5IRic80JyoPrl5EVPH2+LHUj/jF1w+ucIJR
WtG5Jyursvbb3sUFJtZmeysl77oAFpUkKO2B/iHqqd0dBF0e9CWRvaVDB540jPn9
o5MbP147QR6U7wQre7qLODKzNQbSBQ8Tqr60ulOoBy65ktmIOXPVakmJvhXQishG
0PJt5vgPMoVeQZ5aJefGQxb9KMifDs7SA+iQKFM/RWml1UnWjtyaWI6ChG4ibn9k
1/N00Qi2PWIvVsZherFDW4oJLXVC14S4ZRKsB75NiL/aYTYkmuoq3kVcRxSju5EE
FVsUksajivZOQc+wjnZtk81x3IOqt2mnEF+1uioDu5z0t5cMjEzsRt3rOAm3hHhi
2P6Yilbr+lYfv6Kdq2CzlyOdj3iI/90KozOkQTlpnADQG4+juOriyFDsnuyq+qK7
G1q/+0IzXZ0qAK+WQ+YLh7aRzrVnEX+TYjkP3BRPtb9lFdlvLQby0R6/+UmKvvB5
q5kZPmna7iM2HnTG29F4lcjEnix6VtlusVNLv2AMMufHkv+dDMSQFMdwzgDgbyZK
bt+Or3x730MpG/p1PnYaxFRYOcMXfGQcwWJI0RAa6JuL6CDgcZ54dUSDOxMfcZ6L
qDf2AsJWk54t1h9FnrMoqIpqDOMB945glJufb0Y9UP9dL7mLx+1DnGjwM8Gt6gL4
nCRF408xxO7xFieWQhi/wtNKnPg7wZRTskB1QM9It+sHdhqlIy2INLOX7gVyCxWS
nH/qA20omUGs58W8sbNRW01WUuHpq6SNW3mLjX8D8oxsBbjMOt1sC9OTOpF0BzHc
kW/DkzKWM0cIYgDdYEwi3isxHARH9pb/FQnlJETbzR2Cip4n/EP5AItlI7vSOT3O
s29FweJn8kluJsHmB8WSxNevyPWCxsYXOZR0/MzBXCgn86H36l3I/ARtC0PgqLH+
d9jX9/RpQotw8vVVa7B/qaemp1j4ZGpyQNC7zT7twqzzzUuLIJgJmyuJr46XfM5L
GkdZU7T0jy1meg+9jH1Op3wh+6APbkgkpcfd3xiSQhux5XuPru9SHF2yD7MMOQSp
BAABDWuPcBrULyG8hBwCbtjIMRpH2vTwf3x3YQQyFUYn9/s2A+7Z5A54GhA9uREO
CW1GI4erKSqFNr8BW4nshBgCOcumiX44huMIcf3MDmCecveH9RI+hBp8/3o1f8Zn
NTzxI6e/k/rixtwOpwqrnAUCPErNRTdCDMg1h8Coh6EnAwXungR6HwUDyds2mXol
TZD6J8GcsuzyJR9rLNhMsB8li52Ku5af426uJtAO/niVSjLqmktlelfLnRWy1V54
vs18GyGFoEbyTyuXKeGfspBKCNUoTJGFNZIiqKApobjBJBWOgA61CKJggO0awm7O
teKYZ1j3a9jtYoYrQnR8s+QhUwtuENIU9ehLlJCDCo6fzwjwEf2791P/RlrJeZVq
EDtNsdKMtv4CLU2xXx3WbY8BrwTi3RmSB7pTWTnZPwP/Z4QqEXLoymagZqzugPc5
DrezE4BPDAv7As7tXpTbkmPA6mI18dQKw5kTF4/9zO+yJ+AgsiXKpvO4as3B6tLx
NTY2r6dxbrB8Weno62NuIQdK7TYe0CfB4kvCzGrPSK1Gb4Re/vQn+UnDdDhshpqB
jBsfuT/qgZHX9r10F4wZP3p/D9OHxdg8xtefYXU+aA0D2Wrjd6qymdDk+yFlO3Ur
brv5031LqZJzYu/z3seDf2ns/AR/yW2vx8X8wviCug+JrAu19hRk3eeiVlmElULZ
aR22GyGFCnTBrE1dIGulwjkyfucCdrYt/5JnzkdtdpFTlbORKptaZ3hyH8pNcczd
UkpJLLbfH8+X8cy188wk22nby2yQ3gnpwdPAlWwutFS8khFdfRKX9OYZ3FlyJqwY
p/ajRwNvjpIaGQomCGnQN8Q7SR+mlwkT6wQnyjQne1axTCvKAV46hb1EefG7FLo1
nn2wRZOVmjhgrWVI7GilTNbZ07iFUKsAlYNKpf+x3BXxJelY9qXSybKm0kOghI2T
QH38O8ZFSn9W9N1LlZzbYw472/qWZ8VdV33iyh4zeWF292hB1u3PQykuS3NzclYJ
Iw6JhnMSlPs23hAJEh0C09VN1sXEITGstByvg8SFzvLME1YWMVpvNZXST5D/+UTu
5+NBAHWuASd61nPY1u/1Oyev5Wl8Eq3alVvH08mF0dyNKfVLwhXmWEy/mEKHlEP7
VEZXMiPRMEWW5/pMwQl3sMq+Fngp5FBm4UMA/3rOHtS3erFsUus6UsJl4aagaCy/
z0XAjOc6t4Hgy04kI3OtGRM0ovFQUHXx96CyEpBceHk/pbLxL5zbwH0Vbxb37043
cSiFr+gHyKooqKpTZu0FutBlhmp0kMlSDBdU9drtGpt9NUj4qjkKuf2c/MU+5R3u
ER8Tcg+iB8un+Kvae5kT66eOj/nPAbf1Vqt5OsVbfXaI9gp2im/pG4anZuiR6JSV
C9SriwUbgLUhs2JZ3m2PHmD+hF4zEMtYeSiNSdW2aeI7c2RCQRndITpvRJe8ETOa
iwUYTVIFBqBBh1ZzapHrjsm4cw6J+SaUT7pyHInZamkvLZw/7iHP7AgxUfFPUZ6M
mmEIO5sBXCNOzmtUamWiWsyqP/8Is1MIULn51z0SSnSEEm2YnCDCrp9qJUQIhTDz
X00TQFVFBBE2uJoVbkGKYE0ovkFiOFiVt6A54BvaEs8d+hDsYgOZPZPS/q7sSvBg
Sd44IGTFZArMsiyfaE4hXAUKsADIrJfRiQX3b3CnwWpmf9/c2nlanbnPObG99r4w
L1A0WYl9MLrWoWBlM2jShkMu0K79OFiC1pMrcJSoaBF59OkSZSgRf0r/m0g+ykm9
v+wNkUsV/uj215biYAAZSGUNxfszUqIkVMm4/EnJX/Kjc7fPsvZ6N7V670HfFgTG
w0r9oX6Dz3FycF/mtuSwpLD1mYA+KYpjjh7TOIl9weaSWpVY01BF7bn+braCo46u
hY42NFgJoMZFD1ZL1VHpIbwq6eoUNhNPu9P1IxgpX7q4Gz1EA8Dxq1/raJzTHsPp
qzvoPvP/+iSmEV1kkjYUNGzbQoJpLbdNOfyLuRtJu7lbSbuMYtN4j3qu5K79iGJC
XWEU/6uoTv5BcwPCSVCjOWyhcazy5W89q17HSOf8ZBeUBvt4v17ax0MATobyLsoY
Z5L9tIw/w4ipAbfKpB/Xn06zH2an26JT+vah25UFMjd+GY8KsSkX4Z5roL0wf6E8
j76cOmZv7A8WamcRX9Ta2EiULvA18aZxx7AkuZ+pynlz1G0OJ9E551F4k7PUBaN1
5undO3gGSn8exsYzQx44uOS+EgA19H23fwieliWh5HEXbWK8pGcVa0/7R+74FqrM
QJqnqvTwq/tZPJfN0bH4GMsorhHFLXloZxzzTIV5rF3Svl0CpNkGKMBVae7GyA2d
nMURouFXfVsbYFFGXhqiWwPIyWujAJuslA7afC7P/2hp3T3L1c7m+UpXm933lUNH
DY/zQe2xeVmPvbHBh0m2q+MzhYUz4ZXjgcyX3n10Sn0megrgKJPWcXya+9RVd4vf
W39PV0tbFouqWtN1fv0YfaX3F70EwYV5Hn8glw3Ob8RqrbI64WNERzhnnZ/6KGsj
XdS/oTe3WOa2+XU6tupeF6Wd8tZ4G/dT93M3K/Wd/iiNdHzPSZrPvV7lNOKNrS5z
he4E80R03IfksSX7AFVNHkDVimI1B10vVJ33A15fz0Z290RIbSVjtD1vwioyO1lc
MoeXPv5J39NIT4+zmhDLydbjYXxsIC4lcxED6HTu4fFRj7AFwUM8YRapNU1PmXSC
MswlGu20MMtSSulvNKRRkaSxB3Ynxzz4IrcfZq3mDjjPRS6sp8uqXK+gKGYtzifF
e+0Jnb6huam6+YmnP3VacmN9+stB8UqDvLfSgflmgbHmuyCHCDY2FiGCy5bTgrrb
oxgzdk4VoLD7pl7GKA2lRDxnajySlkJHcYyr8EaOoAHn4e/i1myffdyW3PSP4ZVb
K5uGHRdvoSwYEkodhN0sBXborZ9+Z4qSe4BvaoJLRVpr2TE9n6f5+WyEpRQP9eN0
MEc8ay/Hu6Lw78/qRy21ltoC/gwn+wMdMYfO2lbnZI9H0E/bmNuPNlbHKdgzU9V3
mNraiez0Pc20rRRp3K2mVqeu4s2tbYanBacSuobsaqaEbfmIGzvEX/lTF3XDuI5P
VOtWo1ZPzVuVvk913gD6Nf37z7nPkifiE+J98VX89p64BnJzebcpJ4BTq9f+4aKZ
Z0ThtO4RKhsG20oLll2D7d2F47kbPPdjJyr1Nqu9XNS8Oc50WvPIgLPPC2P2WoNR
Cvi1SsWKsHhKuEWZFMsCMevHSiX4jjqiqGCsjCcdXLwUTKyGkLMD/LMzKG7+6GrM
Bn+ZsS0CkZcT7UBK7IjxHGuZUYC5tBadKqRG5Ziau3y6Dz3nDHvlt6PRqf3SgbOa
fudJwmMy3WlUjs9B4cJ2mff5C/wK+eId+rnH3nUgelX5+/DdNXVE3LZo54uk1p9m
7Yj17ZBW4g+tYGK64cU243jvePYc71qf3NvggnuQ/bS5clCaZwT1YSYpS6Z5e4bv
E2UEsk8mS9p7lm812arVoFpZjlIlqVCoRblZI+LXxQvLNh7T6y0XlgvkAfM576LD
1kp6SO+e0sC2xn5aDe+D2/TxLE1l8eKp1ajUk9TVqU45sl/u2g00l1UFb1sQgQ5T
AxQOGZ2s72KT/U1jea3SDHltaQ9zzMShdcpW10EBqjZ+F8Hv0jZEOd7tbIBfx1G4
M73/+Zw5/lb4C5thz/AOKvl4MT8u2eM9ulZl+Sffgd/k5iNvyOap4EGe6Zg9C9cJ
57lNuWp2Yu9og/7alb+k7+p7yWvKC8yLcyTpcsoZ0EFKJ4OV2swZ17H7FEkni9rm
JZqr2UtgtTpj1cy1SbuzCnDqes1t0ktPLmaN05GRgQ4oq4QoxsSqHlOwr5FjxRaZ
+JaCAglNLI3zm+Yuz8LJ48UJPcMEqSC5BhZZ9ZB+XD+xl1kf0BoclTGMNvg3Vjro
+Ol+ifHTbv5kUSorWo92OwRqKC51ktoPegh75lg9ChxZEA4qF4HqBOWBQ9ZPFxWL
MfTYnnQXHLe/epA8+d4hAUNlwdKrgXKhrFclCn9fqUj5aqvCMLmqS5n6Cu9XR6mi
/w1Grc2fP3+BcwKNVm1gi9JchQrlxQ51HEqTnlk/CT9uxw/NBVJ4zqVPs+/ntha2
7XRks+2jFENdxJBr9Ll8HesdFgtgsLEostU9vwZnzj3guxBku5O4fC4enY+Ll20y
GMHpIyhpVAc+f9EOy4awWBw3ycCuBWo6OjYuG6DEeqRPZg9n/XZPYV0XO1+yiYC/
zIqYMyuQlrFEZr6JViDNMHWeb8rs8GTK9c9z+i4rvSqnWm7JMh1QQYkhfZ6sKd2g
sYSAyhrJyj2QJT32x3toaiOLHMUZcHGnwwpQG3QJrke8sOWIXa8s5caWc3uNQaSP
kTS3H8QMEuM5rbR9jp7cO8f6+Kx+HNM57tBhrWFYaKp76n99W9JvZmMyXtNsru3N
4frMw7DstZx8H9BfOztq6XZ/1TQs8XtUdh6m+0CrLmpsNsW+bTlkDF0FMt+QTR6G
G8WFaGqUFbBWic0ew7IJt/WhuY9EoiXTRYxQ09f7xj+IthhXFI/wNheV4FCldlYX
tb8HvUSJd8M9pYzbMCan0w6rtY6qGjIKU16j3SJfR/l9vwc3mAKmm8yaTM8mNADA
fqKbHg9pHBJQ1OB83Gob9SGRg7cYyVVZQeg7JEo/vhY1KCkPXR0Iid+8vH+ukwPD
EQSFPaL1lTGcnit64vnIRw9ifQF+hxjoAgj8cXUdBdi4vQihnPzwewZnOFFT/eMc
aMU68+QGe154JsTsN9BDjua1dK02ldmVkXRUupi6utDtoly8kOzoqq+b6jCYvNN9
OWsKKfMTA4I6KavvTiAvFLZLqzUTALWmi6euYovp/ljmMl3h/Vgtm7Kn1kz/uvLX
890Jdgddx8Wh6iZ7E5q820HoBvIgv8dOubndFzir4tfMJZfvYz44OjvstpkpO8/n
7CC/p80O4c8o7r4wecEa55nxEMMCAWdLgBI2a7GuYWZyEFMBjiqfKixYsfRqESzB
IIEE0wbV96I2sZgERQLu3T/xsAk0FTIj2QGb80kKhjL3mNjMezxclwa7CVmNpQZ/
Mv74cznrIR78/hbhAOX+bedj3Y+qRM6fVTrK5+F3zBjbSpM0gxDyyxEDIvAKTqsB
C2JrtLknIg0WX7hFpaoq6bFCfCE1ebviquzUJ1/aAG21sknqCLs2CfYt+WmY8abp
Od0kjXaGrSapBtUeER8Bn2WDfpN+214FvEA4IkJROF2FLBWTmtbWKFMwWO87c18Z
loponEiiYFJb5rgJ00RFXgVZmwvd/HuIlLGvQIlTa3A6kQtz/nNb9jMgmh9HvfG5
y/dRuVuvDbzNdLha2E7flIZmv/lRHwu7Z6ks6H5SkhSFuKN8eIrKCaKJyi58MGOA
n9Mae+tuqihS2X0Oe/fn6zkkhkrpcXI5fvYLmK+99imly8eF3TT+IWSh2sQTcNbO
IBMOusuR1+p5weAnRgdsJiz4GIOBlEMsI6EQJ/JZJyT61NdK843vnnE/HuZvn9WI
HrYBfAf6IiHGbC4ZqYBLEf24AbNUENtoUBrjYXRwpmZk/fA6DhtU8ATwRUr95BCY
XRwr1Xmge2heZA4IBxYWFxarKWlprsX8JS6+SpUqzuBnXwq7N+ueJQgVWc0dHTZT
Sm5PqTqIbOClruQgZ2dXqvr7YPMYRiytrbOeLLr8Jz5Eo9Ls7kjk1im+lSzVrd84
sKs0kijeqMaRBJpyxAbKVoq4dI0kqhNDNbKZLAgyaGBPo57toErD9KZy+AodpmVP
4ObQKAAFKrIyYn7YqL4WRI85gtfq69jPmjVqKjpIueGOMF7qxc05p4pu02anIhwk
wHHcAHbmCQEw5QgsWCVcJqEwxdNVHqHmoHGsSsN3lYw9lcKJtSsaeIxPdldv5nPa
fRWXulUavYs4ktNlJXTl6XVUmq+IWHBkbNi/gYBBp9NwMrzrNt+zGZcnY8lq/LhE
Ma6Gp6Gz33TaTp9fYX52GOJ4BMi6Welxrid2r7RNUOwZy56ndK+u2LyN2cU9Ix2Z
jqtFmrCl51UwYjki02pgrEd+UfwVIxCst7r8O6DR69436dVF3nWuTP9QURKGiRcJ
LBo2OmS1+QObdgIt4ZlrnlW6Q42hT5mGJ5EFZL5PnsCJqm3uQljazRwfRA8WnTCn
Y8zh0uNo9TvsoPgRbPiGnf00A133XtpB3movWfLdCNRfal61divsZz4V+OnGb2YV
0OIf6zYdet92c3c+o7snfS4M7vwMyxc8fBHZgN6+v+W90g3sHvEGCE/gr+TCXlH5
M+Cz46TyNa24Y/tP+pF3G/jM2WjYb5DZMv7aoXXIHx9MHaOcmPZa3U6eTxx0qiK8
5X3oQjfjAlDqWn5ovVJXXlDnN9Y8RjQhF+CTOQECLBFTE4NgfhGLbsff3b1O8zzn
sqS8PpDzy/luiQe66/u96Lrr+r1sVu2gUT0U673e8yvT20hevYzn8ILDX64OHnXy
upZ7wB9ah/r59bIZOj1yrgIQkU9pH1brs8wMS0zN3Jyn/Q8oIotEt48vSkFfE/3o
XUjLgETI9LOTjHWTAWwD+bHjqwC5HFWr5jUit86askyvMbN70KQ1II3w2pXtz8HF
aFvNdGlmO5krFFHJ6FVnMnDi6vSkKLGRO5dZBlHj77COqru/c6dtqdLUDD1eCY2r
V9v+I+eK0ZMtdaqu//xtpN3IUkutxIf3qcypyunFUrA5H1IIVK6PhcMTMXd/nPZu
deX8UY84dfuoACp1tr2GpYY9AhUu7pLqEl5oGRWbcx/Ajr10qmqOZxSw82M7L3mC
6VnbIEHrO1SPUvE9RcHeNmjlxEAaJxPHG1cct2BQjsjBScicgdEHyP8tt4K+0jHt
0CyJ4djgtf/o3Kdi3l1PDG5Q6k/n2U1LtpMwBj6a17WhIe3XikJ1TtQUlLe5GlFh
nKSmyx/n+yjpjM69o1zfpQXPZCNQjnSGNX/m7L3IKT/jKNV1I64zjfGMNbFSCgob
mncDz6437hPXFWVPpUx8drXcIYcFZksPyivBe/CBSoCKlabFScuGacdofafBCg17
cPPA4ZgoBDWRNq52NjvqhkLZgqhWkdo8zSSOtrUF17tO8HA8l7NtmLerFYypJKsJ
JWFt8YqOggJCCgxM023zYWWWemcNja6+W6O19OpHTedEDp0Hl82qjP3Txl537flN
g0g7CLq9WYHjcMnpRrc1swc+uXUEw4q+ozsM1XKrSyM+l5uFBb7Izpuzmqo0+aCJ
h1/FtPQRCwvIyidhll0gdaintFPxJFqLtbd8aimhvenNSCdYsDOYuAHFKTaiq9yM
VIzkOi/RX6RgbQEW7a02u5ijfC3mlXYMj1qXYBOZnvyc2oe9rGVk9aTsb90Cm435
1fb66Hp8PrUb07T9W2gfFs6U4ikP7hD99v7YII+hpHTXHmRJCxUvTeOiJGjd353C
DeOnef32nVLFoCWsIHcm8KypKMS6NTAnQkxh8xtwHkKUUa6ZZ8P3B36f41X+iij7
PDJKLs6qq35B2TLArZCseM3zmoMeUX7nAKlkZ2m2qXOkMF83FrJyonBxaZhng/tg
LkLqRqCTTV7A/Ud4TrAfHHD9sPTisyk3Wl7PndzIth07YB3+fTO45topE7ZnOIqw
1Jq8rcPr5gwUguUO8aGlLBMjpg2Nl59/T/5G+2BW2p4jnmh2qfjukVuux755XW6J
s+Ywwv7THb6mw4gB1wbZD+qULtJxmeALC+LVoSjiFTeVvreqZuwkI93r9G/0lc/1
9JW0Uq457YmGMiogevZoD5ec3/cNtjpqWlsjQRvThbNxrYS2o/Zq1nadXC4TzyH0
Tred2rx5835/GZlDNOA+1CZ0l3ADutaiWPD7vChts2z9dMOIbcOMaNffdVGeGJtn
PFyAZPdfosoGTEjwRZsh5h1JjyC6OMRnoEEB6S5PwBgOCd1nC2IPXCN0LTMVdHmR
NAFpG6L6HioR3qiQeqFzqXOt8rGTndsjdyyXPAfckKU7ZLaqHKJddiXkyOIw9RqS
axyyMiF5SDgzLxNnTv21nBvbivwp2lbaZwqS2gNjGZIm6z6aHnkw5xGIzD47lB5L
x7ZZc3ctY62Axm0qrJyj1SPFfTV2urtkq0jHHfchMn5u4e9ZYTvnVdIiwDbdA93X
9T5aXHm9jq9VaAIwqm5vd5t3yMl/VlDVCfeX6KUIciku+Is93jVrnI1vkWYORFYx
Cb2PimYzdDAQ2aTURuBKS2h8+Gnf9GN4TFNXHT7q/seWgY8+705tYc8SHJM6gN3K
WYz7GNDmTZRGAiDZBOYOFQ6cU4aq698OtS+gpy17TKOaLrQ67zbg8ziyY0t4ineW
Tmv6R8X0FfXxyM4GohnnkGUUtsOSfk6kAfCR/DFewCFHtAPzOhiR7+XDN+mVoOm9
oipWQQV0hwjvEfq0BKglqTJmWRfIGdh+WMkYMnJ7zLuFaspRMoy2pFJiJLzVSpGa
9pNFHkbPbRr9oV5UW2D7soq8rZhnZ84soeFlRD1dShiFSHtSvE84VlsbCWnjSHUq
miyRFjce727NitngxCZhqpZk8YuZOwtZxL88JFUgIGwbzZj3vxwhCIV+nDJ/IXUd
7NuTFW7djXDlF7i9mrW6sH+pyp+9UqrL4T6gCO9ceXgVttVdu3J/BVtQrA/qNq8y
COTI0uYN08vfSKi92VtQBC9y3x2Za22gotLwN5Y844Hpfe8pebJalwalirrV8shs
F/vHyWtcRyzRexUjlcfIsOUI79+Lu3RXiVmo5IiUjlW7pPjUnsCcwGhSIhE7pWMh
l5YxD62ewhTc6LgGYKirh6WWq89ZL3IPdx6An+IPuS/OV4gimKZZ2DFSpJSzGhWu
UVHRzZXKKZpXppZ1DpsP61eWioiOHMJydfmQb2O5GN6057mlNxqpDLmDPbv9QSZW
vL6FI32Tpjay/Cg+LDNzRh8J+qmcFUUJOW6CRc9nWMBT4algE4EQiLyNJwEJ3vSz
a5EZkQOfTlqK9VcrvOzIJWdKdopipAGiB1tlAPMx01Q/L//swnMmXryLf6d490ph
onHP3U7ysnERkzGdUejzWZvF1bI9iInxOvrS+nrBvO0ck/UneII8g7GEk+bUsJ25
/RWqg8C9niI4N1OmvdlPe6yTkoXfXp/56CdVC90u2lZP2ld1DMhKV8CBJKdDVi7m
B5oe7D89pV/AYVBs+oq/9561b1rcuzb8sWQREnOGSMbN5v3qM5oz2efgYvvzoePv
Hu0s6cNdmNvg54Z3H59CzNHUk3fxG9mfKd/5PyG4NX3czgDB5uKZNRrd98CIE2s6
Xcet7ygf9C/djBr/G5b0n9kfGZlYOFn+J/D5J1j575Lk/wB8xBQFtaQl/oOU/O9s
z7+yfv7/sj2M/5+255/ln0bmP1r/pWn+L87/MRIrxz+9yL+Mzr8cz//O/Pxn+U/p
87+In1//3f/8x3isDP8VzT9j+5/tfz3hn/U/JdG/R/XP+p/a5599/2cfhn+N+o/6
f3E//56U8//kfv7bJP038kOgTcvGxkpAy/yPtfEv8sPApvvr/wf5Ifg38sP5X+Ln
1/+L+PnHJPwb+GFh/C/w8x9x/Dv4+Y+co//2Dv6T0v07+PlX3tf/BD9MzCwM/xfg
J7gLygBl9IGfj7lzeV2vtoP7pEiZM0AA6WdAFFrct8CT4Z/ExBknJT8ZRgyCZNnZ
VsKx3WBr+pOFf9JI/TVC5qbzIXSUPB8KWWkjYxoiHII4+cxN5wabZt/e/ro0O7wA
nF+edzFddXt6T6bQ5YoCisIlRLLrHdaMiPjAcnp5jYcbyjhI0PAJ127YaXO6GXzP
dQTCDjNXYey6KX1xRHpPC53NZDPT+chSFR5zAiPuGWnF07nNdxuST4y/UJLkaTVY
iOfxPLBH99HltNPb+V9gYgrZ5bU5qDe/QubePW4KRkxP9se7fFf3ihuZPk5IhGR6
0WytoqkmQs5UhcBQE+wlUV8g5hDFUJSEyJCIZuIbwyBHu3QHW7afLloilW1Vv4BQ
D3sL5HxT9Ht9lbd7uPznF2nVCN2YoZBzuew7PLpf0/EmcUJ+K2+DVKIL1yGTuQPC
Jl0qdfyXkVlcVKgJzBIyVDZyJqK/JV+U1Jx7w9aohh+5N4pbwDaLKGo0iG4pbkUl
vONjCMdNKlDEKv/60CohA/WKjCVK45qCCI6qFYtEJTrjpgksi2koF3CiKcBvSfmn
H/Y9bRNSs4SlCCVJ/nb9sEQBqhRd/OO2pgL8Ws2gJrQTDKAnCa0iqf2drylGZ+sL
neJ5bmueCo6cNL5cOXroW22tdCrxSNFkhvX85mtJ5wONvLo7fhrdXeR8MXFtEzT6
tn1TUgvctQQeTxEUuH5UVsP+kBhleNxmQiZJfFpQfgSWqtP5THTqJRfZeJCUTIEJ
WXjRGsmaTX3qb4YGFG5xHJKBHsOLE7Slnm0r+k1WA4y3oHNRrhCSevnrD+o3as3J
6WtOcb3oJph/xClZ5Cyh5Qa5Pf/sB+AjY3tEpBSsEMuI+B/XOElw3362D3wOUIqB
cGrEjM7px1AfzXmWcuPXV0L/8Jngl6ytcE+hJheH/oijGP8W3wW7A2f2LbS0Kfkj
/+VNSEEFJw1SFDfeScJfieyA5eghqkmq57CiPV7t8eTTgqjBWwD+kU6SiDEKpLvx
ooskihW98KcJQxLm2FfgKpGsCFeiMz5BIo8J9EspqTv8ng34VgSVEMGCJTkjx7rP
Vn1u4uxjYPIn9APeO9uDcZ985Urkhc1bNsm+fjviFi7JsKl3XM/6t/jYN+Q16GlF
BSoK6dkaw97V3LOwIsiVVUaAwQ9PaCVWIEVRucR6fNM5xqRlDqbjDpH4WObO7k9r
Mv3wW8zboJyyOyIrH4SfDBONHtvW3wjXUTdRza3eA0IdxxqfeZ/A9jR9PtgEeCJr
taDCzG8gqL/d0PA54xHkDJPLQww1Ppfd/IlrbhjVm56KVYnKkC8EtzlHAwBp04q1
GaRbEdI3B3pB3umxN/GHBUSAFTlWRQ0USy6ZzBhgSX3TCfQaSyTbplzm0lwJ1ZoL
sa3UbAmC7a95smQ23HxfBlRZFduXccPi00JZe2AJuqUysW3EfAnPWpJ0ZkGTkK3p
6tTy3zOFhQijr2/TLjTeX6wfhL42NNjMGXAZMyEyHCHvJEpSOOXHKFOS7o+hnumN
vWVcvhvd9icFYMKrlRw3qnm7qk5YkpB/9SAwuyMiuyImV+PUiWVFrYS5QpOEgAXu
v3OMO8dsx6TjKuJLiKpFuUKLUAc5Q/MZGn5y4u/pMdYhgRYlCp8RvVG3cXwaNVsy
ioOSgphU1vAKWhhwUeWCNSFuPAjScN26u5O1fn+u32720g4x9PVdGq5LoiHUEyvb
2X/yUQOl8K1i8MNhHeahJDUgF+ekkEo9Kd7ixBw3IoPuu3qyglbuKKQzhZEdM6o5
9XA4ZarfqwLjr4TNifWDtTD76IXFifyjWiaaOG/xrHL4MTzZm0hvxSQr8VjF96tR
hnfLjr0oFshv9zILzrhYzm1iNqYjA+NZ8wnjXwjnGKg3HYyJY1S0TWx8nEwoatSR
M/AUsR2nAuNPZ6PjK1xq9d6zAuPxMISI4NAM64IJHec1NHQchESpswvRzvBmZYHR
wIel5NMI19WOMDpp9IX2+9/dBa2nU16FerXLp6a888jdlayuYrLXqjPFqJG5aD9k
w2kMIJBCnBgDsxgqzE0wJLmKd22e2wJcPBpsITH5eDO6OOiWpKKNychZ6wNYTjDk
QmLx084TMbYqpKNl1UhCyF0L7dOaYoHepwqZJpnalJj85cklHoshBkBGCyChULnv
4KagHppNW2dNzDMPdYXvYszn40Q/6xepNUIyHGs4Nf42KsOutAkpPgafndJte1WH
CSWUkqbrYCI/Nno20wnCR0pObTWnyFd/ZIdkaNHn/fpafZfeqb6yOntXshzKh0TS
J/iHACPFrHxscPoTsaIvx6a9eYc+3rR4r45eXm6/wK1IL0+g4H0i5VVrLWNri5k+
HdP9jZhk4fH8cbTe5tEUz/24cAhfDtltyfFdSWn4k+Qjeip08CxpFKyuxZ8gkVQE
uDA6I9CbSGqCTCptaqcNonsCsBDR1yNkUmPa5aE+SzC3kuz2C24aK01i9uPj1Eym
PBu10jZscVrISmKr2SiGfpWFF2uTvTCGXSRRqcvwNYqzK4uNWhM9UzUxC7Ey/PKM
fPot9pCyq12/ygw/XYnbD9hDeVqVcehn1bu20pTR8SEslqr+DtLTptuu9Ln3b1+2
8Kt38qsl3Ov6alOHsMcbuFLt/+fBKoJLdCn6Izo2p0leHnIJ7vunR3tuelTecoiB
26ZAbENbL8GW32rPemBofvU5YYmILhAHO62JwLHjki1v/dvWj5w9WTWVdSbZnvU3
Uyj4ed50MojFxxWBBI2WLkfOm8XpaskvrBvBxYYDHNQTnv6zzzMoXavE0yasGm14
ebRo7JwqPGZPIF/272Y4Vteys3VVc6bFlpI1YPKm4mqqe1LRJK6nLmotMwYT7hc7
bRhjPlaj88+IkfgPFbh506J6OamQ0FhzBIh9cmOsEpkcF4wOFH0SrLPrP9Esgtid
NSO5wn0kusLXK9G6lqu3sEnpkabpSi62MnEixstJLrp0/eTSJkY1KaQEa//YVeJT
5r2Q3kw6fn8jf4AApnadZ2W+JrTeJfjCCS5nSAadE9ID20GiTlFdQjP7Vd0gBEtC
HYgKwtiERdCRCXJK83jZqtDIXqXgx0w5/+L3SZAjTVpsIvKxN297Ng4Z3qm0r+hS
AhyQm8MavD4Oh+lPFFnk2OZ9x4ITU3BWyhUJKojLiVlTJlMpUemp6FKaVzSHLLRo
u5grLPzHGKyPfFHP3DvlAzoQznxDHo+s9MQ3BFxkWDdj9g7dhHKVcnGShZX7AVws
TtauH8OE6W9Wni1NQOUMkb4Cvi4t3IBqjgyp8ugctcjpOE5DIk5J9zFCSnV6AlY8
lyBP26iUzoMhUOb33rqUnyhfkdnUy4Jy+d2QfMR4s0cO2i1/k+zpucayZrTnvEHK
L0lSLbR4/cTlcUqswl7DSBYz2XKxxSqpbmmdIvL0P3OfSOZ+cl9TdqPu1fcZPBys
cRqM9E+3q2S9pP7FYFpC4nPhVXG0RrGS0uF47ufhVzJM6HcfCDWfjGPHBMyNicDE
27vb2LWqaWZKagYk8tg4/bhtBZgcFinsE9x731dK7KGSBvEVcuDMgfkB/3HJbrk9
Ccz4Jsjz1v40z/cYwws8W1h9XvZe75WBV1B+jn71G1vOlPlREScQ6UT9VsBndDz6
NjsjOqOzSd9N7pRn6+Vt2r9UShl7HGN2kCvq0+8WI+ccgVOSr++J5SXIqixc6yYa
aMMVsBVydXFv9/pjUzi3mLZtkvIV+uOXNLD3OBaWmna+gSAJv+b78IqSRRq/eWxD
4nOOkb/5trQepbiURHcRVbmcVpCibYLbjrfAayVOnPwEJcC5/BBsim4Kb+ouQ53l
qNlsE1djf7vn3kRccXQ0u8jZ+Qg8eyqbtrwXid0hbBGcTANVjB9u27PvCTyvrRuE
azWyAWGBeCFfOwiQKb47RupAYm7PuSySj6zvFYk1SvmUmDEEoKEhGV9Oe9UH2KD0
sDdo2kAn1b9pwHjnfhCckCSaJG4oxbOIVKSaSU4WaRdDFRXdt9zH34e7KHYE2Uux
TSByisdMQnuG8ajq0fGT+RP656cXeErfpS+V6ZZtltkufoJryfpvWmxi6HbbdV7m
Xer6gpfdqTr96YL91fWeb17kqlTt8mdjcMKEXybtC4xXnpS5GBE2aeJxdsoGztaw
PSN5za8KH1dyetIR8GBtg9459ipJfOzAFQMw5p1HX+gAHX1THa9NcHuhyLnwdzhI
1mLuzs6ez5BkdimSOpboTfYagz6hvc13yTgFjY7nmhI/AN0epS1ZynbUnfynSBJo
eaX0ElJmWUHfKkmHngv9sI89SHx/Oxny0BZvS1KW9RMLiqICS0FyTLkf4U2BseyJ
UCcynmztoUlziyCYW9i2AgXnxhaJsxL7uvZbtcMi2qDxmb0TKku6ZBa6hpwlae7m
oxUoE05OSuzxUSAMxofkYwKLEF8tpvTRH/CluGgTSSvcdlVmyU/wbFkSrnjQuDnB
ppp0sRPbRHMclTLB/O+/nfDCv2HjxPJGoCbaf7swgiEZkffAC8qN5eW179ycEQ5/
hjZZjDaqMWkbF8dxXS90LXKmyMjxCuPJTZGxl14SbxLAsxWr7Ud4j5mbcK8Ks7ts
iaENJr1/6/LNNmPgLsfMOh1paYBf4Xjsk7+JXJ0u5Ltl7aEHY/5gFR9Te4k1wSmX
s5Xuhjql+xPkmyYTOuCFJv8Cd8mgYkVsmk282rNgYMmY88SCmfhqSiUUbSJnBYYp
GpNQ6orFJJv6LSbxHt5ja32Mho2tWSZjkRP9rg63Mc+oJUX400YRShaDX6D60l9W
tbcn2ZfKKzk1+fFcEdit7VhQVkfAn5OKPTkeIzagmW/Qd3XntUFXOlizUoXWOG4x
e9aEpWmUhLI8AvmPn9xNSBFOLBzuWjT+aEm+0ZoqKtw4RQXkV5M808RMZkhJ7r3K
3F3J13F5iXdFqrcSqZZoRQequLXxHCg8Q6MpWQ6PGfp6k7W+w6JBt4/4R5dwH1rf
6ioHodZZpjKyLDDEwtbpOoJT2xrbqgN13pdsP28lT3PEbtgkd+7H7A+Kk2jaLfHu
j/Jvaa0tV3xi92g8RkwIleWyr8YcqKnxt1alUzIxeMzlLWRp2brL1RySUFNhsvJI
NZSkIuhMEhtk5bhJC+HrIkdCo5IJnQVvEestdtaqY/chQZ5mNodNlIkJQBadQjZL
+Z0eVsmrisYe6tA2DpcGWfVWyOLq5p52xS3PsyXZOdAlY2INF3vaVK2Ceqj1jk4K
e5vhmcGGFzYDa9bZnmRLvp1Sgl0fbb7GYXipFL++1tmUdRq6LJYRuLFzy7T1N6vv
2okm59WrUwF/vChcQ35YFWqPykeYklcG1ndYsub70jW4nle/fVgtfM2n2A2/oXh7
GT1p2mL22bRjpQVLyrdCS7gczV7Xp5qn3DKO1ASTpUVNhxmRJBp5lPDxZC6G2mTP
Qf3sK43ZqwLJGJjYARnKDCuBqcv7iJZKiaVDBdpfogJg9Y+9X01mWiVimaXvkddi
cuSpkrSSpa794yJEmipDkiLsPzmGMd4i9/U2I9SbGjRs6r+/pWPDmbAcumnpbiPJ
+LuxiV/rVlOlxwSazKdJnuxTpOPZkFlBu1gv9WmvdWhtIHtIK6tPHsxjG+WB0Oxm
kNyV8HvfGynxzC+yeiRPX/xZZqRa4fHRsX8vcmh1NhMKNw+OfoEoNqfJUe5CWmCT
XH5nkEBgnnIM/U2wkLUe09XNo5NnIj/geW/6W2becnqfJ6UoXBiYKDU466JnDpie
vgZ8bUtWl9+90yjqcNLeYYz3hAME5gflHt/Gb+RDzLeo4PDh4wfzVu03rd4lsSVo
eSesmSEo8EL83FwUEmS+mR/uQiUWwsu79hdFUApPejjEl9XAmP32BzKmcZb/xpfL
3oyAEjaz2+TiQMPtajY8a1pSmb/XUAm35R3SM6y10dWBsUwly1pa2O38O96/fspg
7GyhXwdFDP40fHzI+KbS4bkBkgzd2Quzw+MvT1dkKzM0wBWHwWbxUzLT+iHEcQIe
usIINnzNqjdBRDUx6ESc/scFq/yXJZHSt/DlaIGMkB+6iKP0ccMU5NZkJVwstYmZ
LMjjxhLKcU1l+JBn9iwT/RKDjrrkEwESmcdnJszAbK1jiHeMcjLl36Yz8XActVgf
zoru5DvflNgkMn4NkK1AAIXAR+/6+XaLPnPxL4G7+NCSIVs1wzkReJ1EYhpYZhrk
78ao7XCcZBErw3P+kzgFQE/VxDOqtEA7EngbwtxZzsBZrhfySO5oxgGbqgXGBOnb
vPajyJTv8Z2OW5C3JLriM5IN9/AvjlMXa+1rxl6BhGZpls9jKzZYpq+BpNu3gbYh
TtGb1r3HKxc+Y6wzrku8m40T2ldnV7GvX2htnCwM93ZLibuHY6PXBrsDWD43G1wy
abzrOaGwW3ROlFTNukqsIHGk5PVnngog7GPOIW6UZyEXQER2hAAOy7Sw36aZ0i17
SSQ9tvaUi0jaq3awYDBjetmzHmCc7D7OJSkfrRUNPY/uqrjMWB2SlrPUAnxTjTy0
LFjLPhi60u+aSsUo15GIapt1TFFRd11QV01R4exKflb07gCJzuAVbWnu3ozcTTZ1
bKHqVU/vLw7fNXe8b6E6Nr/V5Mt51YIyuvPf1lSXabRW3Rfq+KhTkmsS9btK5XcD
MjCfUtG3lU0umj0Hyqbc4TPrujtz+bcNTTINcKVI5B/qqYxMVJUNW6qDX+mvxN7s
Xm5CfaAPjHx9ucvtrlYLq9TT367Dkcnz9BKgy+lNOkvgXOJFyc+NsyxVjAlorHUM
I4etLWR9V40a66FxFD7QYAi4Ge+w9hgz4zM9cSkDpvy+r0Lr5G4Ttsm/9da6gKkD
b6l9t4zqf+5gL9ozgTUgBy8jDNscctZ2+oxTL9vMiX1I/fxbmy4q2ztScCboRLC6
85hFZ81eP1Uy1cJehRU4DTJunj7bGHwP/Lufrbyh/G4ceOd6J8ucBbNx9wHXr71K
u4ZaotoiuxbqAk9h/8xncmW9zf6xitb2vhMNycqttjUoEC7IyDAYE9YdL7BSrrYg
ls/F1ED8/qprpIR8kbZKCs3X/D5n+YGEsev7HEq0uMiJKn7VoBQ7uquWxpaSiO9O
ldMA3HIjxZucsyQH+Js/RRyagh913z13tm55H68uVub6Pj4uDp6ucquULHcxuPqb
nw5OT0+r6/scm75GTkPNZIeacl9ltmNzbsmDB/B/dxdrUI+WqhjW49PXm2xpDH24
hWFiRagOkYSEY2V+LVGM2hrLDZ+lmA6ubBNV/NOxtLBcoUvAQoJghfpzmKbSL6aG
Luvn+w8A1qIR9bLLlAg8XPQAdh+L37yhlig7wjSYOSMmQUsUOhSUKjFXhYQrqzm4
An81+UP4eZpu5eLD6WZnQdTHCtNO9g28n1KDTE/11+mYtPBW1kRu9a8BmVBzmPll
5iaTOmq03PnybANLWV2L+nWI62grBRQBw1QygOTCJHfQYBcrTkMBKex30a2JmDIz
s3uv+jsrcxqsem4q6S3e/jvkoqJs+JaMo9H8Vyhmmz57CzeOtLZ8q7pVsOIrZzFW
ziwboZXhs+fmTEfLaSoy5MxvO1cVacNfbuzTxO9+73Z7ZlZXfhl+a8QZxmvEHcsP
9kEuyxlngP3quynm6kqcyixtHHHcXAg+mBz4tNh0PbcGAjalhqS6gg9WHXYuhF68
YrCVX0HREXqVvswoDsFCYL4UBIol8EEk0hqWpvIX+KalK2Y3uDvyAkMuKxTM2Njd
VwYtnNXzxDa4JG1Cb2VmbwFWbRpo9c0yZqGadGzKLVfSyG8QCN4FUu3frGpPyyrs
rsr4J4MzEBwyqzaRl1gnHHEcKJeHwXwleKv1tdRTj6Zj1L/td3s/UUGdOAeMvgxc
fCfdIT+jU2Ww30rknrnwfG7hxisOzdr++MyOFPZ/mUBWHqDv4cizElu/GOXvtPyc
wds85XnpX6aX87o8Vs4sffhRLCPjS+ctQAmtlSqYNX6lzIn6JhTkpCSb5igAYywW
OWUDgx0dfOkg8Rs9hCU4JW34/E55L0zovg5aUTfLON49NtUhwK0gyD+8sKFDy1J9
TZD2opaylpMqeT9cKUeAxipgZK9+QYtNC6T19vCIKmhZZR7ANMM637jhVGldaFpp
LX1tGamInPx8GTVu0qJhijvsSykeGQHF8X2/NU7DohatcZX27XdjaVjulOIdoxRc
iKUji1w0XURDWayyU5PkMgZ6A6WcpE44c9TzwGQXaU9hZm3yo+VjrzD8PJ9DWEt5
CTWwoi15K7XfsEDXIH6yCga6nuRbrAAxnhzis0whctUvREi7YunTOgPHdFKE0so2
WLfdOGLFI0E5I86bcNr4t6PazbehjIYznd/Kxmcjns6t7VoNvX6WB5l39hmeozHT
9NtfshFbJ94eyrcxi7GdeMbUy4A244/X44Blc/aZrFeLp+vaS8uz9+UjhPqf7vGo
U4Zj7DDRld24iQBnAPfUTMY2g3VNYk3ju04KTp6j0ZIUV/QcyUkYJuCzhKSThAIT
bQCAVrUhXvdSFdpRp82KpCmGfluiaGfK3l01h7FYJdFeL430fQfmn8scu14IU9sy
2GqunLPeSVfZjX7zN/Y+yKShbQJaWSNJkoOPeBrM4ZFg9Du3gW3x+pDMF298Gfrf
6+/o9KoTRxFxgRPBFZGqj1J848nJmR3kJnVRU2aDLjDbnaQPjo2FSEyXuosqapQH
LpVJoKoqKr9wLgJwX5VUTVbVjEwx9YxFj2JO8qAGbdKruLLAXwuRKauTG4ydJqXn
ATEP5+j83hfNKdN6LqfzwH7pwZxLHxwZX/9RHwQ8/bdG1hmBETkZ59+P59c+aHzQ
LCasIZuXcYHScomyKYOEkclI2fBnwbM/fxC0RdW+ZUk/v0IRnXL8nt6JUjxGaFgm
u90N0G5sMePdeS++U717O+SHeoAsndFCiYPlZeGVCSUcJXEI3WPpwJU7ylTLnDx1
0bRFqws7BYErVndWA6yay+0yMBcm2dJ7BlehlGSjb3dXS6kik5on3ETV+kj4+kn4
pHwiYg3rLMluLsK4YoB6YfLt+CKLpateO72MMC3RtWYp1OdKscFRkzw3eQ+PEwle
YcGNmfebyFgG8T/7R9U/+FwkeescWdf/qGetXtpAM8W26XJZfL+B7nXi79qJSUFv
1e2t3ln1XoHCpY/V8rfHXqTvfBu44rJIbHio2Zc/t8FTvTD88sh3Hk6ajuz1/9g6
ZNaxxgYDtBPeNUgg4ibHeyFiR/d1U88ZCGo0K0RCSBspJCK7aUYZSt2iyAhqBSoP
6AXTP+sR3nUJwO9EQbrvbSJP2HcyaG7X4NQepZ2zbctbu1R0jugjZ59j4GfTTy1M
Lcw4A6Lo5unhbWftYbtr/ZeNl0U5oUClnkLchGQ/8Gon0OC4tuLwo0UbPQOzY52a
gg2zBF+nVWIkfvIKL6dRiqSfEkDdYqEGSEAE8M+qX6Mc6R9qFTQUrowN66SpVeRY
XalcEV1p1Z4HK1Vk7zxcZ3ppa15+imhJgpO33CVLj3U1laSkuJA+6JjuY+yfDxbr
4gaz0akwlx0JpATSK9TjGKlTOYDya6gTFKg/2rbVfS7ew8HJZMzBY6btTtoOFl57
3XI+hlPo9d/LCo0WeIlT+R6GbCtzEkc1jx4w5gq/2P3T52ZfrvhtbHtx6U4W71e3
zz0PgOIPM4vNfI+zW91pfyzj3PHObTTHjBa9NoRM39P02ARSHOnO+8tsGLSxSMNv
KDFJUyzCIWxexQa3xyh2/KgSKxRpCqzzeV4Jw36gDlKU6yux7gm9SRwQLY+gyHzT
76a+EILcfUld4PY27WwWAZ4adePGRFgCA2yzLwa9139Lur87R74PRq5fXrm4fK68
HqGfLN8/iLdPsf5GOYaC8DK8ejAgkQ2kNUOCdT9iQvLCyJzt7iTmrlpECcJNqesH
oGtQfKETkIGR2PQVIZB8A0YgQ4kUToU233YpyEP0haMKhPgU67Smn2naOYq2Eui7
h/jMq42plvwEKRZ0I51KjBB5asKKYOD7EHx7Fpj+NRkEXkDn7F/zudeSuoCzFb+d
gozeSzjzkqjn2UOX0t9dFhd6Ev8zM8xZQZQenvZe56yd7bP9pRIPSxjeBqsqv/LA
9JW0pPjwIEV1q3NMrUN2q0zfXMt+y6J9/a3lg7WUGCoLiBPx/7D3FXBVbO36G+mS
BumNKCDdnYKAtHR3NxuQDgkFaRFBGhEpkRIRCemUEElROiWlQZA/A3IOevzu3d+9
5373/u/dz8/Fmr3W+6x5512xZ+ZxZiO540Q8Wnuig8/wnZhL9xJXbFFUAlv4588L
cTFBpFHEORlxnepxEpnyEdenym8Zq9i+G5BZFdL8YiMno3rdy9k+s1I2JuqNGo/z
6rzH8NMK0Chyv6h4Kx1KZPs+7ndH7/ftjuHRzluy8dFXXV05KVbVuvam6OX905sX
1l0WMLUXrAcyNghZdg80RwY3iOzfVG5MIlO66Fe57TfvOXPbVlhtz9YMrlwqt+8O
c3t+mIXP6G05uoKluFqzUFc/OZUU9Qwly27ET7ylW8tvro84acBAJmKI7cvjZwKp
Ix/MOiCJGOL0NQ9fkehz3yhCmB4uBuniS88y3NH8BJesgc4r6XP7jnJlkfCysJdT
vSr2Ky3qgVvqbdauMe8fonH1PqnNS/fOuqPUjxJOqdgXH9D4ZUS2qRG0kYxNwHxD
ZJ+Jlt9IyYArhMEmW/sKoWJl+uTR1AuR6kG/T2hubyDUZVUO4/xRJJV1zj5LNFZ3
LIwMb9uqGcq764y/WFPoLr2TeadQKE2KRTJl0J1io2o+Zp+wq6/Eu2alWVSuZimH
WxubwiylnWgY209wv2v+pbT9RKAoSO0qm9jlEb83z1foZiFvgsOsvplpl+TfNh+L
ianasrKLjcWNr4wf7GIulv0S3+N5qe163VK3Z9ycs1XYA/+Eou56+VleAqRAnZ7e
SSKh/OwIHY43PMs+phN1sqo7H7e3R9QPp0KJhE0dhKptzTZK8wcFFVqu5dvX2C+n
ESb54M2pHKYpqJhZzGWnjN32fV9xlGWivEeNHCXyBvMykeLrBO/LOw364NtHahu3
c1FpSiUZFh7PoiSFy4TK25vnbbOSYxJAXn6h6f4wl8mOPj9DbyTJMqgnouUOl/fa
5er3B7Uht7294eyZ/WnYv6fq98nnehVvDmQphBa7es13HQ45fe/0VSiLpdrqXFMI
nhDQKXwEMhF7xV/E3/oM2Rxx2HuDkyEJIzB669WAplZP4WCbRFv5SGhWz40GzUvb
ecVLyUt5IWzKcbF4Be1dF2NJG3hIHTa7OtTsw+uXkog6wnEYwBqH+Q+36bPgW3OU
meuD4A9Tyzacej29pX2EEBk0Nl+Mt9byJ7z/atY1pP4sdlzgid8TI8XuT9Q+qW+y
nLJXo4/GHA5jHrS5KXwhNyygnf+k21KF4/PtamrqqNvKC3IsLwXv3S0OTEVGUr7n
RmJzgY78bI2i2PLkm57kxb3DyNeqHG0v4M876LDXugWI3XIWK5jCaB+8uIwQ0Sr7
kKLd9pBMPLBE62NGVYaH/MizZA05T3nyCxiSDM5yN2fSZv20v1txtZoPX9a5attr
ZUqsHq+f/+Ex3GJx7MU5I5svAv00ghS3UoaDaWjEhvyyr7eblIW2mxN1sQdxkfho
MljpDBv3+7tvFKq6JwwbWQeA2XMvOj9813vTRMqk4ftLxuXo3HAU4X7Oj5+eCdg9
up2Q+5iSgfvzTXKdfJtets/dtqtHOAjww1+k6ruRr6PuEjjeK3xD36Pvo56e7RP7
zOsyXApExQ2hwSzcmnEoLunhVEtBS5RD71NZQzv33qDdVFZuNm3TpKeD5HfF/Z/W
TPVWRDLPeNIdNVoSR9wcfsChM9klGRp3mCq/P78XKUVx5P99aqKOL4O9c4IS6UNm
Cpctu894D5PbWFPF1LM+okSC9E7G9a47xLb6hIHg6TCug+ugvlyy+w+UOzDW3pc8
pykRtkEezvXQ9/wIkbYurrLnu9FlfsjRYe9qOlxa8vSy3Z1qOvwIjGI5F73V1Pm0
zMdprklTzC0KC0aLXT0U+/gjJn7dXxpfOIs6XYMjxl9zchbLwq75jEZPQJoB6SHm
lq0rslWafGV0hSLY9qJE1dec1C8ZBJa084cTxCq9kUP7OMm0Mc4OiLaxnDHiBNMU
/HResrkaDC0QiNhc5KcSZWJ7TYXVd8uQtRuy9h4ziV0aIjarB1PUXgvpGt+vh30j
Z/Casej25TebmCNNOwgqTp3zPcCs3sNKq3PwnC2wr1z1erLxqVqK/+1Hz4fOWybj
Xy72vEbUnzMvc3/kUxOGqXG30l7J3rGNhmOAiOHrfn06zRO3xi3JmkvzwXMq3QvC
rdf0KUOQ6Hzh0q7SP5XnnCqekn3s+FkPv5nW8WugNe5Lxll/yoZ4cLSLflMWXP+3
b0baL17PpB9FqD7qc+b5HBIujCLmr82MLO3zWKiyj7RZtWjJVsDQfl+cocs3nGCU
x7jOx3XMpeZ9xePR25vF+4ueL1Y/PeGzdX3H/3pN2kKqBR3386vb7Sn2toJK7Ija
k2OiIkIJOp1pVJ3RpFlmJcnxY7J5GJgPXvTrxauR5raRJ4so5H2Qb3tTYxj2gWQq
wF/Ewp7InynLBRM/jROER42ZzvEM/JkPM92ZRHSO07+LqL+uSuXO1dQOSNZB1Sh3
I85s/yO5SIVw+VYdw0SLxw7VbVwdbvlWcWZxdhElguVsDpkv+182lfTfLi+h2umq
+saINUTheI/jRav9sJMUKwVrI7oVWWEJAhnEqpv3QsmlYpdKrtdXWwM8KGTLHX0p
Oj+4jzNVpz+7qvk6iYpsWzqABK/n6ZcY9hvVmowyHz8YJOh6VKiH3Ywlb0dDxjH1
vwTP1NnRKZZCSKNcDnrRSmOLbPeS+o2sY0jgIB2njJRJ6W22z2JlmkmxeaWkb7OQ
yptD7hFPPo0mhJCOWpvhgXSVmA6q6kWvpYY2kzvq36cBJQhjX/UPTw+aQH6479X1
WmxN4zCkFEwhzcJKnPCFPanu3kPejlJ07z34D05xMReeT+lQrmG6+Yxfc1MPItZk
kter2LseOq19ZQx3omr+tocQ65egWOxkkrT1ErMvqwOMnvaf5q8d8hOFPxb4tu3g
9316h5Trnh2LcJJ3VQnWoaHyh7wIke+TW11+wnJHOZ+8d7bgSW2sLVqqPuASKHZp
byY9dh7Tt6heTHXlCadnSDLoWa29P0NLGu/TdE0tjMuKdbdfbo68j3RfBiIyRG+w
5ObeURdlkKMOKqF83MjBeWj1liWJ5/DmMrIos+hsSEfw/mWTULVU8TnLuQThgfYQ
zJiXnili+VyWVwPfY1zmlIigiX9vWf/EuDbA+dbWmva19pwwtjyupJfuKneVVBg2
8pEy34N87swXFLzLJnl3tzivuK11PJ4/XXtcJhzXaomO94B4igvpfu0qMypcGiYR
Tj1/gOAuwrq/LMasgGVxzYPPRcj59x3fN8Sjq72l1vPuwmygr1Wrz10cX8kNosiP
kmQUJ/vYSESJOLz2lKhDIYRFwLO0jpFSQc8fay6gKAvxWe6aGjEG33cZoQcYRjXd
3Z9VNQIelC5rxgmOjhLQLT03aNHxyx7OtEEelRZPc6l6RyhDzY9cqP/5deBK9cu3
Uxa6eRdlfa7dm/4egpJn+LnPOLBJaboc4T4a040bcY9GV+4bjj2xCfvCtHVjg9E5
jMTTtsyW8dOCx5W15016PWWOYmSGtGEsBN27aQy88yLKjp/8SsaxVqLQNrko7ssH
odO7QJYRkHdzZRfmm5heoB7wTkbs4jbdmImDmH0tW++ZDN1/0yi/XxFKMCvvKOvr
sCdsVEhXrqx1rY1p55F5pbcKOhFBSb1SaNnHN5/fdCSWWN/W2tHurivBrrRU77pP
ZgFizrGviTciGAhR6+hUpJvCPbjUTb75Gauw5mJIVTpSkGlhJ8+ju1dUJjjNSN5D
hK96DEcn+K3ipvjdS8Itq2BvESDpul+NCiJqXMccZ8kLHWPW+ITSEt/4IGak3V6p
YI9+h0lqSmjSaypRxnL7Oo3o0xq/6I4Id0X9bO16VmaGEfrhFRntULso9C8g3xsO
qSzZV3YStp8+uvGyX/tZGUS5D025b3/XXXSGddzjRUp6kzoqxMjbymu7ouQ6U92b
FCUw62uXO9n8G7lfpL23iePTLYrvPbitE/Zo/+qybO/kyw6fTiIPxg1d+Muy66+1
6uxUbUXXWDAiXkJGKC+grDdP3fWYiGiauFBsPDyFBuK/qcaB1Tni5SI91aO/IZIs
32HNU1jNxbBQudf3qLM7Qh1jNDmTanVzKuzZQ+ZkgblQ94EUPCSRt0bTb2KY869G
J1lUVYxwucp6y66QvFAgHfCZ2aPk0f1wz1cVWxlN8iGG3WujPq5y0ZVwBZ9rZYFP
4F0gzVEa9no2mdx4ajgqVZdSCYdx2Be8qYiLs+1TUhXfKshlKWhG8s9j5EyYW0w2
VhaGZiHqCywp9IV9DqVC4ogIQuJD9mjha/EgTcYclRqi7lXoUGlXgSsdneTpMnHO
8kicmW16RNPBMQt/N7AZ3ry0per9wbXY53wqdmG2NnYPMJMIunPLt2u75ix7/Y2W
wZVtxAEptMalRjoH65fEL3m+UOu+Zd2JOrkHkQ9Fmcbt41zyqfVW5wvuyUi+a+Xv
ljl491MFrSvnk/y7nrYzKS6SozdpLykNcmj6Cma+BjVZrecYJKIuYV9cFHZdlmW5
8jH+vsU9XPjy58p+hCLFo4ZxuYFPkJfwvCqGQqurXjlekVX7VtJVvWk09zbet2ym
6a3E9v6gwujBJ5XFuc/iPO4GwjdLc74itg8s+wjy+tXlr1YdtZPromEidSmYFBRt
CDlvXaOOZfJ4BJGNuPGho5/BRYjUgWyRhCix09zanNj8Ncl1uxg3rlU+kXW/2YN3
rl3feI4stCwu54bQ4t5EyBNUuzNxpymGHEfP7ZHNwspCh6fW3VLtDsPBsozFCDym
UqY0q7drB6IsmgRfHj2noasT6wlMufTZ0M+A2M1+aB1/5mEKPWsV6ZL8bb6AXHO8
y8ZY71bGexGb+RpJLMQrH6lEk3vdfLKt49IUPlLg3fx+kZQKAeSdfXF6qJjFeZoi
cAuiHd/bRnYj0+UBM6O0gmPJxVsXksGIH4PGe1H3nm7c65DK7ndUeOxYFWm5iq00
i61+UZ0cQealRgNSQfNdlIR4aowDmUemO5Of0G7LU7/TN783RjAko/NUOU2rZbCm
3Hu00o1bUKnkLfV+/TqB4mqF3cwUKeXI9lRsZc5L13cg80MjVueqw1kH/W9ry1Nk
Fg3FkKA6C/tx2+QvEdHRpPn21c9GWes4ZRMLtUwTzHobKG+rD6Um+Jd+0RSG06JK
nRMQ7jkYf3Mp2ot/f9/rLhKvJAJSUDMvtgZ24qzmpQRC7Vy9hZpW5n38KgrDUvfq
TCHM1Cb3W9ymIxlLd0e0YwKpMiPJJKuwXmkGRRPKkHp/XDMLFFhxC2iopt/2+X65
jxm0IE8HMkB/CrJUwdy7MXOTdwceh2y5Oyx+Q5m8FtEpSFLQTOaFQicT/Wq96ia9
3ISYfy5noFE+JcbsRFQzm5oT1zNcav6uek5/X7ALlz15rV2stCm3UB7/I1VUCyKp
+KF3c+yPRpQDmvB37UI+Z3UQ2kMSmbwXtBeaG5rGyPbzNshcD2eEJHoM9nuHqoya
X0ViDV9yTgvVUReRpfVMs637HhzkuBXQFSXwVuOJF1Z3xo4DGeccsTSOxJVimiEc
fetbDczwZXuyB0IHeX7FRzgbmY8smPb9s2ofbJbvmYmkRQWIPhWUdYh59yo65o1W
/czDrwolTkTGbsoKatuzbY5Ln5CLG2mLLdIg+nmhSk+9kTN840pDDcr85dm/qN5R
yoLwTkUbC4fNYzXjkMSFqQhH7tEz+3cHJ+FwiYT4oK0/7fZ7SEEzPH35SWzlyxcY
tIbqFSVZqmJh9oWKDAbeGuR3fbspAu3V9NZ4SVy0hQaUmsZRcCsHCCWCPJ5YfuZP
BKUxMpW2eMY5OWA+NA/hesFWuTdqsPFCr6s2heFFEu6SCv+r2embVnOvrm50IBus
7gY7OTZs2sXbX5DCWCKj9sGMHB/tvWEd2PbUiSBpXXfwsbWetvgjkfwhfDeCFnr5
ar0GuUA9PNdYOWc5kUtHM69uRxHM7URtdb9l9pP6umKst7o0GtzfFCgfWGqD3mIR
xZKcnxQjlFmU8Tp3t+GApfRtaEpHuZeQthvDyKAyNuRLo8wTiZtYxZGcMdwQtMh0
9VeSTP1B17lN7BRabTdfd6y3h3sIj11jUavKK68bmY4LY5uxvV6MbaNPNRDURdWY
qBHCVfOV+gJrjUIY12iYA4JZI4m/7BdWhc1RM+5EKcjlihZbWrtsu2tJZMVqI5JG
GXhkJoEYJni2a9+osZwwsnnYPIQM/Z64a3ETOYTGEJcFhfG4D3wXr3dNrm7dQa/j
rV/2eKV9adBRmPGrZ4YTCgE1pW4DOTbZner2JePCa75lgwfPqp/1inUM2G5rLdyf
TuseO/hWGfXC03wgze1of/FemlapZ3dYvvrKY/xLsRr8zpAb68zaW+/FH9p75Sz0
Vq0qvPDWp9/3GSkuN/BZVrOfsK1/hekn0n4jm/z6vOqIL89z4hdDaIiMiivBbowX
dUxv9Q8usux8WTavlO013AA/fV8hJ+mcKsa0qJfK3sMNv2V4dxgB65FzAifiZTcn
pDtWm279XbQXL/LKPaGq/ZaxbUxyFYlICjXy7RQaPdiEhm5pUky4/G4MRVfY6Pro
zM1uDyydpeHlm57KFMMNuh4BBmqIJrxRc2JF7dfmwewWXFRKfOmeiPH3dfCE3nLF
cJDtB37BgZMPH0NmeTM+a/rUC6XHXWtu+lug4x3HrI2SmjYtgpboAO+UenZEHe7O
FPUCtXiL/sTAvifIBpdBV2M0pYrmFPGG7pTDZ7LqLrNVrj2x/rwtz1ReXuBu5d6x
vpe5+qKXbGV3u2Y/m2I5oZ1izGXktdeACxmcoj3Skx6EAkUphRweEs8N2ktmQ0ZD
dtIkHzGyMecw+Y1DLhGSJmJUsqtZYFwLZAuQ5qrKDnBnKXAReK4Voc5t7epBcnn1
gVvHzQp5YWqbkekNdmqIqnAwtRbSxcYquNZ3pIKpoo9tp93igk3FdbRL4ObxZan9
ZfNiujMElY/SSsvxS1uaNLl2fDTQOtJYcGXjrySvkcomxHUyMTGtjymkHrxnavE7
iP4wk9JK38jh56lETZHQEr9cOE89+W47fkcmXsjzWUey4K08D7BBEk0A0VMFm+lb
rV02T0PMi5/djO0d93FEEJOxCpjQuGD1Mtdeul0v6JWYnZmGiqInIcKWqd4NIWNC
ae2aRY56ISHE+URcWXb/d7rRMeuKcxc4S/F79eSQ0y74Nooks6/YTtQMYChaT0XX
se3vUxm3Lck5IacnWK+YK0klMM54rGvtPZ8oHO1+krjDSZT5Lj+qGaPGsA98s9hR
enH2soxUGdtuTET2+nxk1WcPxu5FTM2N27VHLOiYPbQvRbpSaL5H3yaS4toka3zn
5DJCbIFX+ViE7hHxUKqlrBdOBXfC+/uW1dbbM8uiB89f666tzwRMQni/S5ZtdCAi
DiIGX4762MVZimy0YU07zmtng6TjJHQQJa3FGJV6+eEIPuP1vK/fI4MeL6t+GBK1
pHut2UiPbcSDq3g3k8W1oIJINd7QTuyRRCvHZHenTRbDjoXzS91HH0RBrHf8G0tR
+pb3dc10n1SYmC4/T+yOr030p0V4KhiwOl0b1oT6JuxrJ7PFJ7NXyLkNkyvGB+H0
jSYOu9YYhUglnN/CXPesxdbcFzg21AUvVRx2tqSOUCb1+n3t1qHprLLXM+DzPWrN
/UBLPupVRJ12aFzXV7Mj0v8VbKNfAdns8hIQbu0J2+SbbxIfzFGIeOpaIiSTv567
GbxR5fI+F9EhVSNflLWcfpNq5uFqOMtMbKZnfP+Mk+hdlYIW45eanQO6adEjwlQN
8tc9k4I2ufUejdJQocnxkT3OqY4GtqudDnxIMoDcG8eLChuVplg0wRLt1gB1ccPH
Z0ivr+yk7BQ31XyueVrYSfutaGd8G2W0KoRVIUP+kPKCYGeABgLvI0/mN8Gg+GDQ
XLnjwVwAay/DZUjlWkcFtgxhEG/Uh+r9QHLWEAbDisP7qjuWy0iZozkcMtpXL9pc
k7aTlEJqu7Ho7sIiLW3IN8WDHSKf6f4Br0PE2t37pbHttUSRl1/jIQd11WVhUg9f
LFiakjro847XlAs0jopi2sZ4G76/fuDyXaw8ZNEZcoTvd4UCMYMb0spCQsafOSYo
IaAqcksnO60gJX8wnsGH3Eeo2rus3bHFUbHA4b75faPnyqs5O+FbTH2MnO9UCfkJ
Pc337TPsA9VNKsRICokdquqqRBOzHpvpGnJ7ipd0XYyZaMdE06OnawW953ssapjC
epEjEpEipG4Ys3OuaReh9isYFIkGssvj4CmsQt7ud7nPjIZXPGfViqLvx8QjD9Jx
Rq1fvmN7z9BiohJ8CcE66OaDCW0qP3dLvrXnkw90yVh7OWrl8cFb7OsfjdL7qNMP
IU1xuzb2Iut0fA28nbwNLp0ugeGY5l8l36gErYH3ZRLoNRi0uBTt9pbTcudevf3s
+qb0UGnjWUTnNx5b62abhL2d5/MHNi2hbz+LNfStb+s4HH0vd6gOhbP7ksxgAR94
sZFSXmOVjeHzQ5uHE/d1yeUlta5oW0aaxb2RLUUyZ4pcCfnyzfMb0j2Pe4iLmzwJ
2e7ZCHMLc0lz9OjVG4F27910KfeE0arwhBf5SYXx5G8IsfFlXPlUPV3TbuiRwK61
926z/LlCk2l5fQKG07VVVC35xi/dQmZP79/i4q6lZpRCRMu8kCIYybZ8yIUmMZnQ
8VVOl7rlqnVv8S6oRtXEuySiI6c0PI5vHcUqc0hgSD52UzCO+iWJg70sqxpLVhYb
QW8CmpVc8GIo2gilEDOaFeMbtBth94WwQqSj2bek7qru5riLPEE3u47NQE5UpOGY
dd/hRhm67zt3+J4wRqfbqGq2CCH+/t4CATeZv8FzC/Xv1PAlKXbq+O6/ahupHEnT
Kl7fM2C2+TTIp7GRX2DSbCsrtGk6F+WmN1g+JbWQi9cy5rlawHPUKnRBXGBOxsJf
PDjI0mGLAk+26LKBCHfyZ+sB9cr8w4ZDgfrKhkSIhUcRv+7Uc9T6O4TJE8k4tig8
wWP9NXO7ut/i9mzSlFsh71Ddri6a1TzC5FY0dx5GnhX5JrzlPXMk6B46jN00g1Zr
YtL/xnACL39Q+66h4MzDCHru/gFDm5I2I6MhMFlkEml90R3s1l0b2/qiYtQGpDJN
aT56O4oaBedbVJvY76u1paPMto+WC9tmbJsP2VuD5TPxMJ7hfedJEWE4ULGZfbtr
zc/sWLYigi3+SEniK/rbxCIRo5qDRlkV3c3xIAPXVJ3NruW3eusSUtvoDKRpw5XG
e7Epzo9rxqQ/pny57Ta6905IBOOBvqDTZP/gmM+Ra029HchaH159aRqzzCA0lp49
om1mHVz1wi+2Sm6AZMkzcNTQ6SMmYUA5RC7gash7pSJ4gVq+W7SuJWTfjuyu6Q5s
1agsayx4alOFvNZ/cGuT2TQcsSBaoj7tpiT/XRePy4h1xmy5AZdv+Rld+6QZYL6H
VK3kHbreTLOYOPUpreyhMQdXAd5TJhdyuTuYiptpOj4NEYfIF5fcMhkYWygN2F+u
smzcU+VhXHaP777OJRj+jRVd6EqhZ1LyVPuCzSXznLaUBA4Gi7IJiob9TxbJ3URv
L2thjPp3j5i4f/2mL4/Nhi93LUtyDP8QvwF/Cv8D/gZ+h+ChYIPglOAHwQ1BWdmq
q2OPKLs7u5mWUgSGNS0SidO0ihhfMZZf27FolurcIRDU9PaLyg7vTkx754d2FLMz
8ho5icZKHt/J0gpE+sIKXI6O7bPLGCpMhu3DC953BKN7ieRR6/JppaVZcLffsfzE
lPTGAvG1Cl+LwTtakcnC7ah1xa3VrbRNG7vvIX4xRy8NInfLvz0+0tC88ikdfUJA
JSNmw0chjh3x6LV/AXvwelHQq0NmRT4WtSZrluyX3x4+R9RiZJgeEGOYTKJgtXIP
4pFiRValNWicVnJTQajMqfDtX2BgmcmORzmK6nHYQ8MwwH6NyMc9VkwjtaflW6wz
QfSdQ4RbLtG14gbvlmjOuioO4mZFdDmol0UR1b8b3r8QC8LNhBaiY9aQNKj0Ub09
TzZJRuvaDvwsrlP3O/Rb7zcZpzoRLq7BOYIPzRU4B2kQiuQxugkJegOTIJcuXwmK
G2OdetXKJ0+nkU9824GjS5jVQxJ+trCabqhVj5+9dPiBNKOYXC3Boab7wPvcNz6o
VYvXAwlJq1itdnXgd+/MeoBwBNWtfcsdMSKfvtZzolO40Tur+UTMmK4HMfcZaUkR
+r3hAc3o6XECFB8q/SaGVp5LZah80pdlCAdLcVGU8mQsWHPwQp80vnFlza8UFtTH
uMUUL56/MbW3W3gfsjSAEvitxDnNS1MCAZ7o1tcv5iOPRtQLl+J2SgcpKLjSFd9X
Tw0cWJcIWdknV3qmtqjg6vot1YU6G+g4r8N7ylt+79XiGmz09sgafEHKNz0QIG08
b1fqY5IdXhASXJLc/KkELj9bbtT1ED1Z0VllrORyZ0NIwOEHKmMEzOZJb+dLFFog
effioEQmSXqcqABeFepH9m2mKhDpi2W86+84sz4MkliTuoThEL+EN9LrSb69+OAN
9+drKYQy/TyivFe4WwRb6PwdmrjJQPZRoYmrCFkZd216rFLCCw/9g6avi2vn95Gb
b4REbY+6fehfuWhZouk7UtExxRi/ttbgVouHlfwo7pqDYylXTOvG+l7YzmSqpFew
e6looxP7VUe9/k3EpsXBVRHH2sd0KCI1sgsii6jcJqT9TPNVXjot3ZL4U4gXh3ai
zSx2/bZ6bt2TBjmb+M90PVFQ5HtUsGH9uEEt1bFXt/qDyTOFKFRfbYFnoQ891r31
7RUQggomCdTvD9YFcx+4P16WLyxSDiJVWjJx1/MmdEz+yuwRXBc6FSb4TkyAaibL
Tv8Leai/9i78aytcXkrDMPhK+DZRejDy+OQkU31T49hhGIkCcdcl05UXuK3jop4T
re7lhhkoDoSvvu49Jw2yM8buutogfaSoe0GT+eNROU4AQVC3l6ua5wy2HH40QX6T
uZE2+feP8pn3qC4nBTY+KUdGdWMnICho4EbdpSqVfYA1Xes8T0CxM0r2KE/jrdtU
bCa+Slib70YC286mjcdLs/n6W9Ukwz7k31ZX+EzfvV5O0rr6ieUh6EZvfG1kjG/K
sN+m9WZjzqByQYwlhiemWaKugm/ig0apEGshuN7xfHKN7gCWnV6lByaFnJA9+2IN
EkPzR4sed3sKCncyg0QJr3oe3OQKKu24CcdO5pNLMt5GRWHKu69UXZ3uxRd6ufQx
+s07VPbPr1SHi7dhT0k0bvUv0BLbP+EprtivuBs3TeiJXqn2ttcxzAnvcyO3jI5L
0pYO5lswFvEKV41oKuv3+1XPRyy8Aw8Gdqk8unfd1nO/SkHqNMNb2PZDWjRFJ5vR
puieXGZVcnVv52I166gcZWvcWJOivfQBsb/5RllMi1ItSZ3uGn9G17oWTplcJlsS
GCQrLGNoH61wReGK9E1Xri8SQ+W3sgfniMOZA+tCmJCRmhqD7ZAj3qPE3Sicg6Pk
D3LHzrsm9twwUl9NzX07ISMOCSvH0YwNE9yPbUbfyeZziNxViUK4lLOag7X7sXt9
jYrV5qqcJjPHHg0JFumnl5ISmE9yAi88GIZbxU0bQi8s7HhmpkBxe4IxczOrC/Gt
cNK9nLtvKb9UaUW6PU+rtjxAe8W3nNTRTFHHkx4JOnS7y18Szkz6HUQ3Xc73kqZA
xbXW5EViJnexvrEODc4u3bgAnBQ+S5D2lUd3x31Jv+/FxLbVK5ndsXliV4jD8jwP
RSaKcJNOw/3uuNy9lknn6aT1zr1Ho7Ojj/QH7i0/uyB1xzknu+vW3HPnbtd3rl2u
Y3l6RhX9Ne1l7dV1Jf01ncWdFU1b0U5RCzmQRt+hrbKv6INvGcnbd16o0i21jvdP
cQYHlBQ0v6Jg9j2amcju5240Qs3CvLXPnaRVLEBWGzc24zLLF85MNp4lVsnXbRo0
aeSyXoTduDK+d1MatfhBTzF2w1spdcoiI2ZVDQbSwsQ88rxAeVcyZ1YpBnL3Hkln
abue1qRG29xbzlgbdKWcH5PZORBCLn4yCNBz1s28ekkPcy+8bXE8JkOUDQtj6xpR
1/6eTtkyXFovMzjo/nVV52Rn77AiMsxJib2O+APyp/LqWXkyUSjkDJddvEN6+K6/
2w3jVPkiKzHXd4eu1yGxQpmS8nkO56yq6uXd6Q74FRmvSJ0qSfWWz1cQnPBYk1P2
PnXhsuFphNx9W0TcobX4RUOXq88mykYuBd1gjy4G76b3x94KQ1H7qH68DgELkXz8
aaS5kZLpgMh78YU61QGdR1/dvJAHIqZexe8+Xf9KqXa0rBIigzqKI7B9qNtz4Lvv
B4/TeHNu8gixXdqh6qquOFIslSnd92zbS8SRfjdIg0HBbLvI5U6mgt9TbC9/f2uJ
m9vw9nAtrvVOo4j2dz+UwBaMBEFvS+Pa3ooPhOGXjo7g4Lv6tn/zthLgjQ4nLyjh
5uHh+6MUePEHsEFnZ2SiqAI++9ViNlZmNk5mDrAu3XVXK1tTMBuvBBsrn+418C1X
I4iLJ1hJQlLcwd7FzN3l2h8/tgy8X+OkKQl+dlZ2NlZOdj52VjYODj5tVlba439/
WJ7/CWQliIOpq4kZBHziiTKYRfzYaZdjFySMXMzAJ20eF8o7mJ7//Oe7K9whZuZo
rGAONjTWPwDm5uLi4AKbg0/LONl5OdjBpzX2P8pYOY6D8EsZGxsPK9evdqyswItG
fi7j4Ob6lcvKwcPL9pf2uLn5frXj4vhrGS8b569cdi424OeRfypjY+Pl+qsvfMAL
W34u42QFfs341zKeX/fBygm8GuYvZdzcv5ZxcXD+ZR9cnH+NFS/wM9J/KftNnLn/
0t5x7Hn/UsbOzvVrrNjYuYA3tvxUdhwr4Ieefynj4v41BuxcvH+JCyc7N99fy3jY
fj224zK+c8fmAjGysjWDnAxgFSvP43HJBmZRdnBwAZ+8luZ4wN60N3cAA+Mc2JYA
64AFObjY2XiNjbk4OIxMzTjZTY4PmMeUFyjjYjPh5uQTRvv3TU5fXePscjwFTwb+
8Qxj5UG7evWGoiQaKogfBAKJO9g5HrtmCpY1crQ1sgfLm1kdzy0TV8htM7CDOfi2
lYuVrZWFA9jU7LaZrYOjHfDmGSt78HVuEBqIEQ70E46OgXDhNP+55v8uzmKEcJz4
QdjHfzFBiMd/4UBHoAvHkboAeg1i/FGP9AfrFJg/0q8QAKGAgBZOIXjCR/tRchz+
k7bgQaf98DuggL2Payn+CcbfDSEQzckegX0DPgAJ2D+QA/WAP2fb6SDLH14CFucZ
Zxbncb6V3+F8y7/DF9BZbACcxQdoFWACPQf0EvJxAvoAFXQaefTjhAE67a2Lxwnr
OAF9jXOccI8T3nHCP04Ex4nwOBEdp0vHifg4kRwn0uNEdpzIj5MICAz6MxpnHpzh
rOdFT9pSOZ6nVreNbMGOEAdHBwjwNej8mwYAnB00UHfaAOA4NdjIBQyxcrY5xzoL
MQgB/2T7ZxZwSOIny4PJ8dJhdMx1sP8d+fh4z0bUn2QgPsffy0ZgZ1c7OyOIxzni
H0A5DTVAPDtw0dMmf28M9AnUxkDnQW0M9DLUxkDHQG0MjJvfGKOBwaC/GgP9dN4Y
HfxvGAMjEWpjYMhCbQz0HdTGwCSA2hiYLVAbA9MKamNgsEJtDExUqI2BGQ21MTD1
oTYG5jXUxsBiArUxsOpAbQwsT1AbA+sY1MbAgge1MbAyQm0MLKFQGwNr7W+MJUHS
xysKKhgEMgQGMQwwwPC/AsBkBxYBIP87cHaig3B8VvFr3Xn85ERIqejpxprIWZEX
/gupCc+gPz7/d+L0iE5xdkny6/FAC6CNvpOWHp+0BeDZyXfh2V6A3gASUJsN8vnx
6QzAwgy0I29manV8ZXp2rnvO4j8FblGg8eOdHAE7BvCnC+cd/K9zoVbmxAX437pw
9rV0di78t7tw2kmrfsBfhHMu5P5xPQrUnLcGXDj7fH6gQMc4OyAA0DHODwboGDCv
AEDHgHkFADoGzCsA0DFgXgGAjgHzCgB0DJhXAKBjwLwCAB0D5hUA6BgwrwBAx/hX
ezUhyucPtAAHQgVJgs5pAw7m4L9T5QMAU/n+BBCH36t8QOFfVb5f8c+qfL9qUMD+
f4c/VT5oGX83hE5u9V74aVyfjVigPh0kfVL/ZzqPX1s7z/wd/icrd4B/wF4B/KeU
OwCiJ47/y5Q7ADDl7gQoMOXuHFBgyt05oMCUu3NAgSl3MMAAw98CYLIDiwCQ/x04
O9GBKXe/B9DGv63cAUsvkIDan5U7wAKoAdoBLlX/Vs3qFP+ecgeks+HyX+PCb5Q7
6C7Yz/cSdIyzLzkA0DHOf11Cx4B5BQA6BswrANAxYF4BgI4B8woAdAyYVwCgY8C8
AgAdA+YVAOgYMK8AQMeAeQUAOsa/2iu+H7LZBZhs9i8FEIffy2ZAb/z9shnqj/xM
8AH2/zv8KZtBy/i78TvZ7CwCQP0/J5udZ/4OMNnsZHcnLJhs9k8YAx0DtTEwbn5j
/Pv7+zDZ7A+gwGSzc0CByWbngAKTzWCAAYZ/BGCyA4sAkP8dODvRgclmvwfQxn9U
NjurAdoBLlX/fs3q35XNzhz7L3HhNEKwp83+BHQMmFcAoGPAvAIAHQPmFQDoGDCv
AEDHgHkFADoGzCsA0DFgXgGAjgHzCgB0DJhXAKBjnPfqTDaDh8lm/1IAcfi9bAb0
zt8vm/0q8AD7/x3+lM2gZfzdOJPNzo/SswgA9T/LZuetzizO4zzzd4DJZie7O2HB
ZLN/whjoGKiNgXHzG+Pf39+HyWZ/AAUmm50DCkw2OwcUmGwGAwww/CMAkx1YBID8
78DZiQ5MNvs9gDb+o7IZkJ/1FXCp+rdqVif4zaNeP8tmQH52Ivq3u3AaIZhs9ieg
Y8C8AgAdA+YVAOgYMK8AQMeAeQUAOgbMKwDQMWBeAYCOAfMKAHQMmFcAoGPAvAIA
HeO8V2eyGQJo+qSlCX9UEO9xzu5m5AEWU1BUF/tJQPtDKnM2cYCYOZ+qZAa2VvZm
YAuIkaMl6PeCGeKFnz36vwwgDmcxAiSAU8Fs8zg4CMe9/+04ARb/+EfYji2PMH4p
AyBwYg3gT7HsTMIBWvy38KdYBi3j74bQj3GcDtzhPNkGRun/JFEL2PNJtyEB3NMI
AXVAmejJfk6ny/G0cLV1Oa9m/cG8gH+S/8wEvJA/Zlg52p6Xps438AdQThsDGjib
9qKnTf/eGPgMtfHZsgGVMUy8+gMopyMOamNgaEJtDBOv/gAKTLw6B5T/heIVUi0I
BAYGBAwwwPC/AmcTHQAw1YGzDCA/mfagP0+OgPKzxQJYIP4RzvjHJ8Jwm3AIxzzU
Ex4SCPifZr/iVKj4n5gDJ1AAzk7az+IBYBPuNAF1QAJOXM5iA5xLATE7bgRo6y8J
sNE9ORMQd7B1tbMHSxqZuDhAQHog4CRF2cHtrKAP1HVcAPez1X8e5/bwt+AXr/96
YMdfKiAVV2NrMxOXf3D9+yvOhxo6xvlBDB3j/PcedAyYVwCgY8C8AgAdA+YVAOgY
MK8AQMeAeQUAOgbMKwDQMWBeAYCOAfMKAHQMmFcAoGP8q73CBKvCnd78AlhnNYAX
V0CnNx9rj1PPcbL9UQ/+YcNynFhBgIoCAtkcJ06gDiyrCIaYmVg5gs3cHV3AXODb
zsxgDdWfyvwuwMFhUcHhw8H9A3sFB7CJma0t2AViZO9sbgb5mYcIB0dEBVB/afbf
pBKekgD8iLD/QPE3IWAbOCbg0u585H/E9Lc2Z+mHjXXdSyXhX22AOj7RCX8gRwDB
YwFXSmdgP4n2P8J/hQYIe2juTwBx+OtDcxggaDVAjB/pV/z50BxwD/7/Tx2QBgSM
Yr4fxwEkYG4DOVAvcG47HWQJOh3lwKg/zzizOI/zrfwO51v+HYR/9AJgA9Mlf1q+
gaMEGgMaOPsiED1t+vfGwGeojc++SKAyhumSfwDldMRBbQwMTaiNYbrkH0CB6ZLn
gALTJWGAAYb/4Tib6ACAqQ6cZQD5ybQH/XlydP6CFFgg/hHO+DBd8q+aJJAAm/+z
uuSfzxFCd2/kfNChY5wfztAxzn8DQseAeQUAOgbMKwDQMWBeAYCOAfMKAHQMmFcA
oGPAvAIAHQPmFQDoGDCvAEDHgHkFADrGv9ormEIJHNN/hUI58eMJRMRzTyDKHedq
9o5GVhAzU7AL2MXM2eUnCdLegfkP1wETVYgjOwPY8fg4XOXAxrYODqZgOuCImMFc
jGDua6DfK5KwpxL/BBCHvz6VuHocHEQQoEieWvypSAKX/udxbHkE3F//Fb97KvHs
nvY/wtlt7D/VSGgZfzf++lQikP7/Uf+A9lWNjF1tjSC/0f/+AMqpPcA9WyVFT1v9
vTFgBLUx8Blq47MlGSrj/0atD/gIJPBxlwGdDLQO5KfGQNhvOLtY2RkBLzYFK9k6
uPyDHcGkvz+AApP+zgEFJv2dA8p/n/SHggB7nyYMMPwvAjC9f1oEfgBYBP4jMDg+
bTEAAScBv9b8Dn+V3P6n5GcxAY4FOBEDcgA/Tp0Au/9QAtroO2kJuuvuk+X3B6Bj
nC3dAKBjnO9/6BgwrwBAx4B5BQA6BswrANAxYF4BgI4B8woAdAyYVwCgY8C8AgAd
A+YVAOgYMK8AQMf4V3uFCU4Dnd4JAu65nu0dyK+ATu/EqRwnkx+fgXKgDMD146QM
qE9WZvYuzoCII2HiwsTCdCI/OZ9oUT9Xa6ieVvldhIODR4WDvwBHBXe6Q+Av3McH
UrkqFSLANuDgeUHq7FE3RJAhiOy48OG5OgCAvHFeBvq3Dv7vBBxwlxfO8HgL7SQ8
p6GHh0M5yZnhLp3kF46PEsiR4eBPgoxxAe6YCWyhn/QdwBTHAoPenbR4FpHTnO5k
+yyBT8p+B+CAT7v1n3oYEGuoCgS6qiQhycTGzIF2tXFmfWYxeyO9p7EZjRPMCnYw
tkYTFASzyJnZW7hYgrmOi5TBLJJWti5mkOPc1sjFTMLMxMHUDCwsjObsAjEzskNz
h1vWkY0ibcGp6S6cpyZCzfWA8Ir6g9UDQGLR8Zd2sWeiba/INisX37ZraS/s1uhe
ebxAde/hxetgUmwbvn6urZUXebPf1ubWhB9m2OcpUW4biQS1aEwsrjELen1XDf6W
rRSc7QXmNCNWOGARw8J4bxF6RFmftPamNkCbULVkfthBbCKJ1uATWtw9UPqKlz5j
mqbCqo0lHwrhgQJjodWel1Jmue1CoL6vH5oBubjaYrlrTrv54LY4UR4VmeLE8Fdp
MjKDe28Jkt6OBttV5DfMpsCNEa9hwY+SrO22p/sRY69cYDn6/mK8e7fce5UhteYt
uh9Wy1jwGFmGivHrK51i92lob8TETyqVZyzQKgd1fmVWVSPg7loXiXhLuYIWs1pX
45QsNcV1f2sz0IiPf8i8LrXWd2Jp9W7Nyke466ZgnLAIk8hblPyvOuGrctBdBwmm
SXbx5wztitQcSmjIAp4TC9/harpP89Kq9fv3o5ezxqbWEqm8m1dfXEOVVvJ8aO2o
4+LpOIafcgM3hdKm25ijbGxztX876F5BK9vik9KhK+9zh1salvPmGblnE/BT2CpM
jdmbrYT50TlYpLKnR6PCu4yTbUTqExPrnw0kfa9uTmzaJ596whVXoGgon/WwbNbY
pZ3Z4/7I1Rumg9bmdlylNN9mpSRmiXSaq7fqazy6HrGhOfdwsqPLVMX6bMiaTjLu
VEg9s48ocWi3D/UpFXWs98bNMngSq7DkyX0kt/Q4rG33c/y8rsfxh+ce9mMS4Paa
BZxh1RKHJ10zEK6BpEUsFfwxCW5UF5p7dnxXkwoDuJgsuwxreC3WZDwTHkSXbmt3
BXGu0vBWkVpl8V7WW9meKAj5foBoXVmTf+8R/YLe6pa+H2+f/CA+S6qF7Cr7Elbl
Rc/x23B3VBfKyP2k7skhUdajq9b16Yx7YpeozTPhf9R5HRARbZE5NOBSQiOcqCzm
YdEVekd3MPKdIcXjPAi4khNtNiYXB85UDbm4Lv2yBT0aGCuutG5cq12tH5c7cqU1
EyNNysGTVp8tWUqDKt+nL63Ww4WglJ8zhr9BlKW1fqM3dFNvhVxvvLRv0XPIdc0Q
N87IncCjB3eLmY224di0bKVTSCxlQvDNfW2syYl3GA2iBrhxD1E8JtAQ3j8w+4gZ
hMDedrPHwxQhMobQkTilcQlJioj1CUvZLmE9NtMDLW5NFPH79qzXIk11ew3yAuWw
i6YL+JGtqFATex/gbcHNtYVeip2WSCnb91cndrt6DU/LIwyBF8NdSIhgPqIWcziE
1UYUK1j0JTHrMxoDnRsJdA/jcMHaUy6W8MVztBlPE2T0UtdJrO3ufy+349mcL+xN
GvEJPaIpUKdDN9aSikDAzZgfu5Ufh+vuGxtjN63q3kubLujv9o2sTDsW8y5EePtC
zmewENYtsQLTPcvFb/3hjFrZdtEeok/N0qlyGO6JD19/aYz/7uVYp1f6t8++Yw/F
c944YbmofA6eKu/VubqAviKnof8VkqmVxc0R5mSEO9vHxdYLSuwceGZnYfeRMcxO
wORiRBs1j2WYpoTnh1oBkdFqUZ3MxdvyQwftXr2jBJAlrCMfsxS9zScmq3PJC1TZ
yZ5y42gKcs9aaBVEqOvwPnTrVGdmsuY6SLySbg0QjAl+vLNJ+bjGZlckwLhoVt7g
qbw3h49zQkINRZKwgEm6OPFGm1PnOt6V5PrNC6z5GKWiXxdS60k1D/aeST/DWdyS
6DM33evJNXUY/GA5ZOT5UWPqWeczrSxaAhHrexk+mAo3FZ/c+SqIlIgTpUl5WWUW
+3K33eaaA/ynYR96p/WQotExjQXNyfANvKknPo/8JawsKYsUnX1lyIpnO8So50Rk
1U2+SM51k2z1KIR/fMFJH1b4LGgIgyuQJI7LiKSHagRTMoVtZ+qDPaKX8QW2i87X
m3O3cUn69VVQbL30+vHaCI2tqRi43Uo0SO91Kcd+fXJDV02BxjlpJWD3pUceQ/uL
K8klrgk35vboF995PNWzav+cl8DAnZnwIcJqJhKewbonhtXlyyWSARG/cIk3l6Pq
uRq15MRVnqT1PZPnG7bfZrBrL5GSxW0MTySU9lZHQTeJ8uRr+9oSQYop3Sk9iU99
ReQrjUoGDivJhu0++pcMlYc5ooKpiLQzm1mm1HMfqCms3/jeC03O4O0Kv+eRE6El
4re/h5bp+33y/TZYKI6ANLlkN9ROcExgHJkHY8J0IJKvaz30ecgOBZhe5/6Nu8ra
FZu1lPmZmZfspOOlUyMwL8eJhJrxZOaNKRpPjTcb1KzA8T2+WVyxcoOxxMrwyr4d
7do1i1ZX40JePO5vw3NpjhIiS46h9TW776uNfbHvdE7ZhXC0XGxtIuTec/QJtClo
c7kYt3jwkPwtqdbuhZvRbxaep5SvscrVezmis2g8NpZCdSBMltP7YIirqAmPhz6G
O6rS9an+vb+59Dfdl47FbdqaAcPqLZVs2bFezVP3rHIsGBQJk8jvNN0jydl96Cf1
JqFSbJKEmgeUwYHQzV/3mJXFbV6gb8JdBHLPfLDvW57UHGZUL7pqUl4VQ+8br4zd
y/k2w/Kpit9F0ZSEEpB2l3xUStLY1Z+v3SXyLVgk7RjR19vNHPQs6Hj72u2DQIn8
8ud7wgkdu0xsevq2+s4P6lw5QFUpu7M4LEadKKQV8UmNgRNE4A10L/VEDF6nDbyj
CxZKTtPxbm+T+RmS0H2uVipl73yld2Liek+oTmsRp8hBGI+6+HkLty284Xp9GPkF
3IIlHds1lajlb3lCtas5tx7q0n9UjVV4/6AFt2E2e/Nab2ZU9K0GO+GR21Of3tRb
HOU0uxI57QwjbakWph4mBuzN+b3DITOzifqU+/nW58eHmCvvZiGhHPc7zHjkqi9O
mEoK8y6zZuINYTjyuBB/exCuiF2GsXiRfNY2ELvadbc2Syzq1RfLtdpYuNTHjJie
l9fvi2FFu94vYp0Xc9zrL5b2MOqJ5W6kLrno6Q4u4p2/2WP1OrPhQZOYYkCNeQ+8
CwGHwPzjSOPLW0vpFvyMx7U9gT2ZCxL883VGIZIx/XAU7/vVyqWkcRvHOs1jJKPI
TEZU6Eqj+jDj0korYow/TGdg21JcT255ZHU3Hb0qXDHxwx46B7VjY/c7dnByJ/sz
PIWijmevtXnVmjR5Ve86LJh1xOrbrXx1VSC9O2/e1ekr/DlD7lkG6l16hK+gp5js
venbrBZKFI49RVTfzTIvkfrOtwfk9NCTFGALBYSTHBJYdaDVcbwwRYS8qsJB7v7q
+bHhytZ0XgpTpyFX9svnpvtzcINq45T8tLOrXH6sNeZo3/VpPx1U0yAe51oHQk0i
5Wyi2rTVB9XB/CxFmvG0/DVxtPxv42jxayXfSZatS9wrKZHMLjlorH+QNgRST53P
UUt15JV515MgY6uHeGWmRmvPBpRzdB+HoPpOzzVjW1spbIPMB0YkR9zj9XwI22X3
6fm4o0IW4zRomeuzGjfEOQfgeoLEJ8JCG5MIMHDuhYe9xY9/a/HpCmQ+IU46lmx3
qojpOp7VdNdN78MQ3vrWEEW3j85fhRV48zjavt8LvIH0UYeMutTbml+ya2SgdjAE
rma5fGpJpGlQ+kJN8/srBopr6BGs4zbeKS3lDIS13WNFCe02OKGIhFFEo2CvFdQG
XAxiS4aaHOpKGzEGdx597Qn1Ir0E9SG7sK80gu9jx17XokXudOi2fe+APNVxesCR
/SZvaxSxmtpv2bg5Tr86nQDhxbiMg0EPWqV3TJyg/YO5QoMrjEYv5SrS1hD7ZHHX
NDt8X6ncRHp38UtWsvalPnFR4kGVVtJbLhcs554/CH2LKYDEv4TxsGubqasRVcKs
aim6sRBBWM0aYyEE79tl8USDSZZX0paeVEyNL5o9LmD3mMk2q9x1mXgslyMR9Ek8
piYlpMc3zZSH0Dc3yUbua8hV8u/mFl827kwsCDA4VekP8j8bcodjzzepSlh/02pt
me/yXM6zjz835C2hVyLRevEDRYPg0ctftqbIfWtulB5KmZUNGXpHSNy3ECkdrMDv
Kh2ECKMeCuHcL2CuVojmLNG9hKxsvxvMkqnsu+6W+LyyDetjVcSac4FYhM478aCj
eLfh7QtPMnopuMqJhlod0V21bmNDSB6/+vCBN7z8LcJxpyLHsnGKVFuDO1fvNpiT
2Y6F6+jkNB8ZP6ggX/lcqGugzybw4Fts7nqb6swz1uy6QF66hGm1xitmRV+fF4+t
7pfUlaFYlN/xnWlxeMt9e/XrJIFpjMza0W0U8XyJyrYDXP4hYRVnB433ciy24xrx
/T2Ul/MdEcz68SGrMhu+DYF6NsSHT62Km+yF0ynqR2tHJWJNhZnbpbee4T/kFhtx
nHJP4kPgaadSfF1nJNZw61owwj4CmXGjgM01valGKpogN/O7agrvFqZtth5mbvHi
MdgQ0RWX0EQwPMfwKb6o5mxqRknBLkpyxW4D1EeJVwvP7dnoP2E0SSc54YDanU2A
oWuFEzFgi05OOuRypQxu0rG1W2U6Lw0TLdQpdZ83DGHtyh0KtqLWxWlkh6padrAC
wePbIu5Nrk1OaUfkSy4Hr8bHmNMibthvCnghKCFedyiTkWh5My/Qc6TcJcdysWCS
3Wpf3KD1TpIIuE4/WRKFhSTCU/dBKrMQXBDexyfctG6gFm+aNqzsCqs54jb8GCoi
uheWTUhJ8hFRrGxvFRkqN4T6XGryP3nJZwhhNQ5DzKRom2zoK/H95M3ixwvzlnAP
1OLI1/RGXeP09u+6xn22DObWyOjjiPscwrA83HN/pp3Z594WpGhSzoxHO0NPXTvG
xZ1dXp2k3nLKdZSQ9cGnK5U95vLJ8vmM+mDHXrQZe9NXg/k7kibwCCMCW4fs/VjJ
qp6+jRluKLd6pIdkrRq07kelpTcMipPj5T+Pt1zoQKNmiBlVmpi+ir/Z6nBBXukJ
Lj2hyqvP2EjVBurX7t7msarekofT6D26oOGvrP38BtM7icxe2iZb9Wtwk1wHD6km
X/ZH5lV9tqJ3NWVokri5L3LPCkMFzcze9Mfl6PEWcBULXLoCOQcPG/dZGfu5K1xV
D0czMIuSkcXJXwjwM/Ecp1e7ymbODq4QEzNnMPdpgbiDvcvJLQ3gCvn4M/D7G0bX
HdzBOqzHBRysJ0kP7fiK+Md+AN7ZfpQgDiYqZi5gneNNCcnj/Zq5u4D1gEZtHSAq
jkYmZmDATNyZDczzY3fO7GDes00OMB+wedw4mOWGu4uUisvxJfgJQ8qZE8z2w2Wp
YzbbD++kjjlsPy7cpY6bYjs9CqAByeMDOT141WN7wHllYPvYhu1s+5gLROnE/s8D
OtnPz5H70xkWEyMwKzMv13n78/cSfmt/3visq/6hMTMvJw/becb5AP+O8ZMxENZf
7muw/YivwrElixhwc8P+hCphdtvKxEwKYuTx79/0yNJA1owdJBE+kq6XGVKRHGpl
T18ifgxniiWmaowrfYkKKcD/NV0T2gDTRTICpvvKL7Vx6Jj7JtPtlRZfK8kiZhHm
vy7y7EZN79mu2BHu7jwi+77jbeG9KDTmBxLVa42TLnECiUbyGpDgdiikPk6uf/oZ
Hk2UKOeCVHr7zMzNoffvcRzRsOfuI84Lfd0pQTeUhjTALXM5Lb3dpvMWo8Dq4kfU
wRGJiocHzWKCCqJoY2bh0y3hZmbR16+i3Lv+PI6AkhTkRA9Co8+0ybiUEITSeCE3
pAUjBhKWQPUpmYz5w/D7x8RMnfJEZkeB/ZbvjzY62h5RVb7vRuCOq3r+2nH3dtB2
/NeKOyiV4t4JLZj3SZui0CVCY7C/wfsn3VzPbrlOhvRVUEv9AqmxV8jih6w6VOxv
17116NBvuJOAghSKWYVRjU1CGho3LmeCt4M0WzvQpe8MIU2SZPgHriOYSOrizzhP
Ut3dD8nu/aTJOUYI6k1iQcEgiYld0KqYaEXioDtiLgRfbJvhJkKHj05RIhqOa8MM
uzuENkkUsITNSbkizhY9LZUpZJSGS9cVKeF5SPUCd7rtMNhHRqOGlWLmHTEoT6uG
k6Ig+NWtqQ836shCAqmY8WXEY8j2ZYWo2h5tYDQH7SvQh92oEae0qrvgdOE+1WST
8gtOOgTjSwzaDNKNr0VBkDrB3XjkxnRkVjEK7DsX+NpButHwpHjahlg6KMlX78qj
WUzfYaTr9n+9M8X7JZPAMgIhcjrAhZeD9AVpLDsc5QtKrXvbrcGYWz01Pus+Hpn7
ZBk1oKnCOxiR6HUgMqLrnPAuHVeDe2rIhrD8lYnJOvzdqwgtWqktsJnKXRuROCNf
bkZZtwUz7EL0qBej46lfIYomNaVfiqQamU6NfXMlLBktiYhYbD+asYL7WvItBLJp
iEOFrdwibXeMwyFlWde9V5E7vt5VzcbeJM0MlCvJmEL4Uc20WNobFz+mcL3ZV+Gc
IRm81Gp75UGeGlsyXxkkLGb1nfKCLs5q+5e6o+gyxWGSDyusVA63pjyoLNCOHKr8
39ANXtO4hkXHA4dX45fhorwPfiNbgZwmQLkcStGCjO/VSIZzwBAgHMlmGKQlWIEw
c5lUmI7Fr3xDpUtye6/j4iWqwTDejkerAZcewZO2PxdNHcTOSUPfiEHOZAoUvPHJ
0T+cOK0Sh2lKQdTrZj6F4e0CQVc41sX+xO6OstbMzze5s0aVrFhuEhWyRUvP9j3C
QL+SJnmLAqGD2kAyQNlrgGoAZIOVn7qVvDX+AWOAacDhucIAM+96kKYi2dVIvE4J
9PdwCUWD15NpEmdyUi2Du8spB+VNd1v5ElsdG3lG6TJjovYyk0m6D50o2qe4CJk4
/RhVHmfSugruKHm3cCCZLfmVWnpL0qoHxSy1KpI3JE80prPZEjNjcMObJNS3PJ7A
iuFrCMep6wnOzMCwkQSb9La4hyc7mSLzr4YYmbhOqBDI3s00kRP9jkqF9XQ9sYl8
a6dQmJ3WPZQ+0fIgt35+zTTSkiQX1YS/ZZLeojUoNg7EFVp7wfIefjNBym2251ff
oTorXZVUQ2HHTbraPSGSjNCb4HKZr4j9BhxNG42e9NGt8Lw4Hm+lApLc0YtPKcm2
rsLfdFNtafYCuVGGEuVZHtke7sZSpXsqF+SKqdrsjUJWc+70KVmzGiqnRCfzB5Mg
FSP/P1LeAUizpUsbLXbZtm3btm3bdpe77Koud9m2q7ps27bt293nO/Of+b+ZOxP3
xo58917pXBmxYj3PynzTkujIg9zgAIAcSUQUFULos4dDmrABE4gOOFaYMjVkr05D
LqTNYQEmjfbcCKSLAskSUCOHxO9yAUjcs2eAXq7KLGG7FmCnqNi2QLtSBa5g4UF3
BBi/A7/D/5SWNDCW6maUh6XswaxGsAbl6sGVB8PsNrCHrg+Y3QKzh9AGzdyifcu6
CyDTh28H6UUPmabnLAw7NiL9TmIaymF08Z0ONUhEv0adMTnERN9QOiRJP9sgaYnT
mqoRqqy3sz+tZnYJ9AzTFey056WGr7qJ3b9sS7MZwTZYrmfdgRU3enC37hram1c3
MmW77GrcHUY3hm2n6FrKnWwjiq8nFJyfHIkziGKbvxkJUBg5TjAfSdGQQUFAGYFF
GLgc8LwPJjcdHX8jVlkxwTgelj4ixxhomOgwIWI4aU/VEW9ZPIvELpZnD/85S7AI
XfGMPAsZ1oSUJLD2q6JsSe6cYrTiRA/kupSHRIGii77vmv5GfEnqXPBc0tz5XOCc
0pzVXOgcAWZUoVxd3vNUrrm2Jm9FRmOwqhyXRJvsaUGHqrwqvYK9KriquAI8VSKl
MsWZGnuOvc523M/q3LTcgtwiw0RCvRpxh4Yd3H7UfqrwjvBeyRPJBUleyWvJVMnR
RFYqFvJMpdaiO20NjWXpZSEOUY38dmWPuhuC/dsRnhE7ZWZlaxUgZUUVY8oy5YfS
DMWWvJsM2SKt6fdjijvvF0pPnHfod8B3FqGE7aEt+qdIkkhLUaJdzt2S0tzSAkot
l2jLGsukE4R5qlJgy3BLVUtAS+2Gfst5y3HLprmQOZb5zLm8Oac5tdJLta4fG0UC
s9Uz4DNbVokWZwvsedfyCVPMi9BTexa+hS1itxmmVagqo5oReUklKiX3UQsmFQI2
MOcWK2ErwSvzK4MNbS7gOFQ40bKNE5aZvZw6nHYuUc7LrUDrKK0wrYsuescyM7eL
SEcqRzhzp3NeZZNzcDOTM3plftKfnYAW+lbwRtXd+qE9HIH+EpoJ7aTXpCrSnNzH
ZEJrUwv0C/Y527a9sL0EREZ58ERh06h5TKLAA5wDHwOpA1iRcuiP6eZpT2nfpFm/
ZzB7jM2Z1qYuj42P1Y0JKAnNyiulHtPOjhb2mi6YQpgWmIKNX6RTpbalF6Xb0dsx
4dXT13w3UDB06N4hkxKRcpPK2ScddR1VU11QlVAdrYjWuNc41XAqj6iAU9+sy1l9
Wh5rKqlp4UjlXPZxXNg7T6ha2WmkbRRctVylcm3OLMscsm1bZ/EK7wjtWOoc+EgO
DAdezene/ioUkxdtFGRUssswWKREXZgvrcFV4DPilQxFheW7fsFpwR7MkcTZwP6+
bX065lTp2smRxMvifhJfIqOULVOXTvq90WjFBk0mBYN2VGdF+8PZxSmplbX5oU2j
uaDFxqltv3If97xz5r0drN+odRAxRjWGLasy6zkrlMfv0fFq5Gblcv7Q5pzmamP3
fWpwLPS0brRoNeU4/eA1ya4puwRvsWrg0szPya/Tr+KT6MHYlbQt692Z06rV+WX6
uAqIGxgVNAOSGEgIiAqIDswChATEBsYT3ho1A8Eb352+j8TYYKhEXtLc/WhlSgub
CDZGaRAD2glKC9mVVZuEm9bb6mkSoRFh5lsyxlNkNcap2VpEfSSyGG4EkEJG8b3C
Y15F3qGYH55QVFh0SfQzywJFI3EjjyyTre3aR3PK9eyu2uCmTLVELEk9SSlpIekC
SackpLRmyhyP08iYCBMdCRZxRHy6ojlFGEUDhVBdgKlNxnz6Sbxm1grLqqfr9hmU
E/SB8SQHr5oLrdtFHLOkpuLKR73bGrktjJs5rtlGo0dgO8AG6QZSJ58fcJfeFpE6
mXviRUInbQddL5mRj2jXlJw6CTY86LfG8CyTENOLMe8klKQGtlMhV8WHHuzgjPoM
05oQdilv1kX2JvrHtD5ZRdrjrEsOv903AYvmela40fTMxcQq0M+es9jlId6Ue+Qn
VGW0dt3Y5i3xHM+c5uq8oUZzkem8na2dKrR4KA+oVUlpqeSkO2pDupUGdC1uO4dV
xFsSEynPlBDq9SZpC42FWjwpjYJTST3v5DsNqVSF5Zna0OxQb98fGQq0NF0Na1bP
E3RDdMJ62roMLv3JKJdUTyhoVBpJKkmXqjequm8zx6Pjer7qSZ0nN5aL81wL8ovf
Fp0r7rXa7DJfWndc4BYn1Teb/VtyDHsjopzYdIvTVBucEmZIlwsvxhHS0xvVrTXq
9tdVtxcmTo7nwZowbLVqzuddPx5Oud7cmM+YVzRabs/VcqtsLyGX59WNVJQa0lvb
9B+rvBAf6/3OP1x0flkLk/Nsr36vtsf+Cy6tQ1W1pk37zxPgJ8Bl/4+XuZeyTRDf
2bmtqerTHxM9I0JbsWdTu3azneec2L7N599e40IuqbtWXZVvzUWIFtTn2N2l3cvb
KFqONZ3UnbQi1EanL3G6NlctVzR9tF+fTpAkyUZkvdk1vB2PEvfmuo8jZ+FWDxrX
eZhux8brGMzosqH43D5Ct/Am6utW5bIeOTY9e24Fb0UeIwZpW3Qtz+yP2V/yRmPE
6Np0bdt3XAuOSwfnk602FmW1H9t8X0S3ovBsHW11TyLP2heSplxeVU8qLlbfVn3c
ai+5X0u2irbbpLZJOnc6V95LwULgLD9YnvXA2nTaYh5BHpzfsB9v10PbQ+V8h1/3
deyWq+70ynBTuUtPnS6szuEuul7cF3Y3yOLJeoH3u0o+G89LxmcvfR8/O4zsD/Qv
mY7r4PzKvSs/vS8jLOhWQnJDcdvHPDjeSncaPk597NY267tkPF/N3Xu4VtrG/WQ/
6vZ9nl698Bx5vZ/YaHSusP8dl/+BXr8/mJhY2f7O/Bui/QLJEkJCggZOJsb4f3Cb
Ir7OfzT8DYT/LxzH+C8MK/sLu/87jlMUE/yfYVywitY3LBX0jwSOYci2idmVeZp8
oQ5nijapRpT1gvo0rYR6K8za5XlUgbqEBOOxM+IJ6RkoH8qAnYiyTgmB9g4a8IAZ
z54FsFfFEnlVt1NCct56dwHyO5Gma64EY1INy3STSe/b981nu8NsjFz/BsGOyleU
XJJeVqfh4pu1aaORbs7nYwLMfAVM6mJVnvjxCURfQarK9y4tvlg5ejWyC+tLNbsW
LGpHKZKbdbBO1fo5ki0kYf86y/X6sC8hPXJ4TadAEdghMsTgb7nd+6whUSFoq08s
YgmT/T84oKjLkgQR3EHdvWtC6R63XGHlu+XisdbmlEXuCK0WJNMmcIS8WkJbxDzY
mvPZ5OtuV/1dhkoncAZcoBu6FKn7QLNAdBWgwji2xL5WsTQES4NtVq5OY18ZCX9k
Rp14g7iz2Zca42aAheB1aVjktz5lKiW91W01+X8OqI9hH5/pKFWge0pw9WxWXtUf
2X0TV2TmyvxV9/irxigEj2OspAiuHEAMcJduBQ4qR3fRXep8BlL7kNm5MgnpDfLb
fgpkaG13XneXIw/F3TeSd62mukxs9aEpJkJawxr2pgzP7dDgM0leUFyHVNv05wnd
Ru0Z2EKuFzlKU8krw8uG1osxckeop3FR2blodf/hgFRxoF4z/NEoj2k5//T6LSr4
IkwaQ5XhHzKK5GIS4TuaZEjJiBb5gdvVjvTYbjrjQXWTuZTuUWnR4z/TXBLPM3Uq
BE2qv+i41VP2C+IpAGdR3oEthZ8q5aBfYG6NfO4WZY5GRWdjYhkYNKJ9vi5Rr04W
LkNTnFE8MHN17+ibLfEuuqF6taKEedviS65Ojn4bwlkHsuz6hmlDqf8OGo6pURna
WUkdwzrAPYpxCyrTcTOwydMxU113Qkn6wum5p8sD94bajKve34q7ZO9D7p8NhPWk
JWbXrmmZ1TFr4qCIKVu/ULTqiaqjApJ0MjFB4iwgNN5edBCmi5ci6/f8A80mKdPr
42SqYJbEyGPOSATtqSxVC4OT6aJmG6/XL0St9zKYD/qTtoPGh9KHJDOFN4U2gVAn
llZST2pTEk9Kr/mlbTzW64GYEc2J5AZ1dr6iumnxuzoHpV0KXvLuDeyzgseCCsXN
N26Soj2damu3yfF0u4Imx7t98lyXV6dD9R2NaW05duDN9+8A4xFLbMC3Q+p5u1cW
uZuGG9CcEDaXCYsl34KXkKXsUi8sGG51NnuE6XEjYxHXcDIgZEHhINZ8kgPb9NN7
0o7GYW63KV8o91n5CDrJkMvm5dI0WwypvH5ukyWB8/poS2Cd7DUrTrn0M2iED9PY
sno4xPe5KZ0RtaY6dYZ22qhxT/iGmH/quT/6XDoMYgpToU4P7eKyhbjtA18iZnoJ
2nwfb+S7ee4kqpX0emR/7Mwh39Dja9Jku8bFco8wvx1XPc1+1KoYh9vyCzwK+MD7
ke2t8u9m7Y8l+mOm6Nk4/s7829T9J7P2h8/7P2aN8Tf19n+btb8ouP8/Zi0z2U1Z
aRk1dLKDrWMKkRCf5A7TEwJ/hkscBUQhTOKrPFBIEKmrMKgoMgKFqrFyN6BYKKGR
CDJUYIDhIsQNvPxAj4KwyP56pBXEZQXL7Uba+6DG5vJh0+Ky2aXPYiuA/FsAyE9n
dcCvzDnqyBenPdqISKN9j0Do8ICw6oDd26amIGJPwkBzbx08qanF4gN1Dxe0X43b
Vqm75EmdFj794gjZhIi/AECKzLNy+5Ki7QMlKtX1YzB+gozcJVEwhjAwouZA5JYT
7vZVWT8UHVC1DX9PId3LwdSYwGhnzopsk99II9nOiwTJ0f5OsmWW5w1m0qEskQaw
/0g+O/uUIQ1Aj5yqN3ZImmMdxiiCjHERdgMEAJ7Yx9HuCBvxzGGeBeBeaLYXDhIm
YViIsPjdYv9oyPTluk7p2ZCBKrFXZvubu/TkXT10ND3a1yq7ZBFAEg2bVPO48wrs
83ONhQPz567lTVxfpXeeIc9XlWvSs8ksgcgsjU3rs3K6DlSAB2LNdJy6ziQVgHqb
L/z72+Vyl/gAN6AA9RsZt7gh1rrxfTvQZFARZ2fWToDZVrRUR2yv2QF2I10hHI+p
oxevqlyFaHz+RBIoTCYi+4VFhVLCY2PQsCmTxu+P8J+73RwW48O91BnZ3WjXwUcq
CkeJEEFh5m3B3P7qsbTGkEF+89t+6KxkYBi+mVbI5i56AD7BHPLNEmBDdjwAQkTA
xLZ8nkA+p1rwDJBDne3mFXFVTjGMnh+HL3hQ2uG229IChEoHD9Axxo4kudQYeZtB
1j1AiLFgzj8gmf1p6YGo9WGwvzLZA2/gAwR9FYcHTgamFQey4AepFeBdAoAUYFgC
dA20tAeY8/ecApENYLX/og2i1g1jDwX9VYwfMqRHih5ww98CPOAKHiVXoDQWNR8u
VXABHksT3ENIQJ4dGbhfKCwWPp7/eYq0GJ0ysDRHSJ7njsgZsxVcJ/DlB9gUPvOX
d0CfIITvQLMGMEsAjV+Xq7mwwcV+jm4Ju6NkgKF1r25LNqPywjb9RNvGugKgDtb7
mQDOPwQOPC2qDo51LSwYq04MiEBgFUeYD1QikhYLm4/VEiUe57AH/CU0x+A7OuoA
xm6oRuS2oarBgqEk/fx3o++q0mgHrKbwTP7PAQWG8zWF6mTlfK4QrAjpUTR9qvox
+lrVKTXASwZnXNiwg90YO9j2vs3o2oy2LJUgTXCLkW1fT3thtkmv3dspN5AvA+B6
nK4MvQk6If2w/XA3Y/AGushiITRBrALgCJLxia2JleExwQ/B34MQfjIr+BfLOROG
wHv0aRtS1EQvCbRLYJPKJiBLhBCjKRJTpNb7K0tYEuqQ8pB2ECQMcxqLOaJr8OvK
VRJn4+uRwMXzySeSkyLLSWKLCC7Lcki28HvwewgVKMIU286pl35vzdSU6xD2kfSh
E0tgSrlN2R2uSCiLs0o6TfEikUtcTHFL0aPNJtMj8JP8KHxrBlLo4e9R8s+rVs0R
3a7/yRMsIZKWm2T4zTDNMMwwcIelX4GkPd4/vglRroT/uHqGpIAAU3C2wGOmuV6m
nnPFZIUeR4wt/3U24bj/Du+o4w7ChMREa598H3sfc79uRPHLT3r9JyZFjILIhMi2
yJhb5oOWyd3JVdYqC93PdoqkZ0pbSu8kwiTTJMCkmFJpFbt55PnMUptSuTl6S1JL
A8tly9d52rKoyaJJt6zJTD3mz7230JPq1jDP5hfL+94TnpMEzDTMTkwMTBXMFOYB
Fow027ThtP20Q+bBenNNqAYQzX3NwwZd+qTUizFlU5K6CI6cisrzIppp3vz1Mp4K
o+I6dbM82boJJJ14Wi02gSbtJiU3QTkpOnU6vSqFyxxeheyK7PwusS4tv5HuKfwV
/QiB9J7inPCcLoMsg7xtI6LSuLJpyjzNPK4BdqNGh/Br3l0t0uqwTIl4iahhGaWl
uQ1l/dbJ+kloqwNzUuYylrbB3Oo1DY1y0YUfHL3cQ955HunPVFA8EeoRmajrqHrU
59RKNKfUeBoUGqDqNvUn1S+9K31pVjpGPoMhlrtGdROF6wcNFSU0m65d5z5caTrV
66htsm2TD7APhK+krwxgPKHuoR2wj0vOruRtQT7zCKdH280T15G7YGReZDWzEkWb
mRoTFBMwE3lQ0GhXaHM06I7TDtvN2I5xtMa0kXru9jlzKqtJu5qnL2Myi1GHrn02
fetLPMvvza9UcFJwcWIRg4lFCYeYk1C631Kq1OLUqpriHw0vLS+LeDl5w3ijeJE6
XTvLfOieDN6B3l1f1m8Xrw5fFl/lQNhByiGOIPNBREFUwXihGCEQQV1AensAe9oC
8Ohm9Ii151CBBN+EXIO5IVigdVBenNBpqZnLSc88mlXcfd3dQGgMRYSF+trEY4Zm
hsQiolClUN1Eh8X6RebFZES8RFJEpFLUqTXq9kQjNSPxC3lQ8bBQvIhdHUseZ9al
QnfPdiB3L2iZtJPrzlYcG/ZLRicrY/V6NBwocbHwcDbhP8OQfpbsS1fe6bW47YMs
JrSFvsYfDlAdRl3rPJm8xYGkBNUGTQun9OmEGUlUSqBI7ALJCTRsudTq3fjvlSTG
JuZRMJVMl4xbBNU/1c8KkhiEV1PpMPGQ/UL6zHn0Qq0jFvMXKki5/NNx0uROGqZt
36M/pO/FI4nTSQI1oOosazfMxEyyRxTGEA7u9tL2bEdxhm+HX31ZTFncXMw6XT9C
3npYLqxgK4IXKrVXW2TddHpat+87T2Ns8G3El69GRUejTLA2bcM35hR+KFR36pvX
XR4MCLYIKmx30ExowVr3W6NYn6+b1lVYrqYQ6k7fG47uhO/IkazFn25q+Kg9r489
BJ13FDwUvLptuYK7ra0ft96qpxpq6C5PVW7pVOyP3eTeNLWpnXWqGmg56MNZxBjH
1DMW13ZIVlmKzRed5J/4Y8akHXSceDWdZ64Mri52bdr4zQJGAfeD8eIiY7f7DT3K
W/1C5/0Ga9vlvZOnuSetXWZ+en7C5+LXcZNiwWIFgz9jXOa55hbZitkSWX9GxQ/U
7DoM2r1v3Qt5IZUdyzPltTyBsBNwXO8MPuFdZkFzL3uE+5Qek71nPzROaYZr5iys
LYQ15rNaeEl7bR5/nc3EmcCh4Uv/9L6LfEhNqxsxk5qMm0DJSOfIdvO9ERwIvo4I
QwvlVHPmba3fm8msrK7cGPVPqdK9bnEsWe14fVNJKTOr5NDh8sn06TgPeY9awG3L
StY787U4bri06Ti2r3tP3q2I7gT1OXzReaXbeGj12Y/+zMQCjvjyckHb6fWpu8Zz
7LPxPg1WAqfLN+bJ/m7+bnS2m0sGKUeZVcpX8T7/tGha0nF39mNRf7Lum1lMSLMQ
3WfSc5VcL+hkySSVaL3oiViF2GTkc+S6Z81d/9VoZMrsbnAXxUfjY9J0Wbav22uH
meFw35XV9Gkqn+RGcSfHy8KDzaHx0d6sm8VlYVH4Rlkn34P/e86r0d1g3PGZ3JNc
UnYUn5s3xNuNO6mN6cHmY9Dt63/h0/4dL2dkZWD8O/NvFP5Pn/aPD/sPn/bfo8W/
4+xO/13k/Hcw3MXW+XcsVsrC2AlfC/8v/1fnH1Fcxn/vU8jA2cDazuzvzv8VClc1
cXT6/UctdAy0zP+MAv977P93NByfTsnF0PmPqOzoYvJXwe9F/VWorCGjIqxBJeBo
YWBNI/FrOAsjGeW/WgqbOBk5Wtg72zlCMv4r8i5i+8sNt7D9NSMZAyNFOxsD2/+T
I2rh6OQsZG7giM/K/svPN/iXwMDAik+nZmHsbP572WyMjJC/FfP/9WGh/4f03/TE
yMb+nxX776H6/7y8v2RZA5vfOvpv9GFtYOaEz8H6V1XBXxsMqUXDwsCGT8PEyILP
wMTGgc/BwfZrn/9qImBrZm2CT/OruoCT0e+DFxz0LL/BzV8CDeOvvfq1ufbiJhZm
5s6QbL9VpORsYqP6ZwRpE4M/GmX6BY3U/6qCz/ILVP2pIo7P/jug72r2R6X4zMwM
v/fC/S+JgYmJCfLPDH+BJxNGfMa/Dkn8QxX/PIjwNxT71xmQv0QGfBZ2Vub/Bfpi
h3JWUmn0yvZKSGe2SfA9ouvu2J5RTA9KRtXUpJRZzQfKmZrZIQZlBpXUAj2eGkEW
A7x/1geSfI9kerHnh0IB3ScFJa3Asx/w+ECVy95VFDMxNlUJReiZFMIBW233sTMs
qNtIb1poIzO7rOM7PJt8XnOarTs+YBUPOu/2txoPWaCdypprAl+vNXWKQc6DCXL2
d9E5xzJ0Vvx6NH9+2lQeMW1BBdjcgmNTYWXE7C3WXB+IzoBphpS1UZNTxCZa1Cm+
VOu7m9bMXeF/FART0eHwegU4PSNTgbVi+IJRBH7oZnN2ETYLB+/qbGMZcZoHx8/3
Y6QxIpUWxQoOcW9bqjgIdQoQGAr5pyOAav9J2GQg5SJg+ftVDFYlm5qvyZDqLsjR
5l16AuVHhW/+/U3qtGuCQrN0R1RaJ+UP359vNSTy6Vd7+0x+eqaMATAgKvQfVzkH
uWZLCfnHhqE/90kqwbmYzVOVy3eqf8TLQZMWotqVyRoA2yeeSJRmK+znfNtSLF1U
KpAwAN7mKf3gf/KEgaG1oN6Q3dva8XSp9xdYDECXFQ83MBKBRksq9gT7wtNB6aNf
3UwoijYWPj3rNNwejIOPxzf7I1WfYJ6ydLX4xviteyufosZ2wLlB61M/umHJO/4+
QZTv/nRR+8yNJJbdpcS3pJu3jLb3lwPLC2M7u3WPWT6jn/NlHHMtJLt4gcVdMVCM
Rb24hxKGdn5LFMbyxd1/pEh5QukZhM+hIABYQDgCmIawFfsI0QE8yhxyEvUy6sew
CqtWBsV8eL+yVL6VMJhB3IkcFOo32dJGoCb1kK/gosb6X8ek0/rnkAOpAsR8eRqJ
LJzFENGJ1FFo1alVsWqAQjzmtSnmQ0tutgNkdm7ntGbEAcJwYCNSMhHaWak/dCLR
6al9qUTRW2f6usKIdth2mHbUdgivkwJ6d+AteLBRiQyDyCreQRFcl0xQ3cJGh1oQ
atS06TaILXLvWQVpE5pDOBuQ67/xhin37iBK1DlGifdmwPMQO6MJw8t9o702MwxT
OtUsd+UhmEBkC2NS6ag++pbaRnmg1Rku+41paIl5PFxMO8tYmjH53gf/Dgfx5UtQ
Z4WgXsMUm9wRFcrLAbiPiKBezpQZ2otjcCeFYCvBvD4DMRYiDMSXQAG7LZgxgJA7
8bvy0cqLROcOERFP3eD2hUb6Bpmv+PTM9OogkpiHJhuFmHeURQtf3RryvdeJxehz
akSmh1mK8z17VrUTCsYavIgEnVMVTR8pBXsh9cCvcfkcUBqZAqbOIvQbR1pHS/MX
XkLMVesuW1dLd4503F7fY2taKMsoXXwlPTJf/QAAozDsV/3ca33NS2nsepMJ0pw3
f+Dr0sAvCxtnSz6UGC8g7wvYJch5OIbrUahiTVP4Vjn6JdTPsAXJ7SLEeIFnK8Zt
svVxXFlMMiZNcqz5dqUUis4GUu4kbMxSEvL0rsoXnAgkbdvIxAx+zyo/nq6NODYR
x7fydAxhFrCj5BXZFfAPN28fq6NXmU1P83iA7JiqPnMINQbKFzKCseLsralJlJw3
FkeW6Bf9qmxe9i0t/Js0jmjJq0A/hloqRyWjUl2fRdZgiMJgrkF8/qVLvHIVGemr
X96K5ZmrXFGrKqY3AfDck9UwB4qZeuuB1W1WIs/nDxf0jb2JwOELNcQ9zH7iRX4V
leR1xbDgF2EROWr/0lbJg+XaRs3QYxd78VlZYldF7b1yV9UyQs2OE/7hPtZBEQ2t
w+XyXndy2lp4rmBr7W1nucnxO/7kolmej9NoPrZBBzj3pADSKsX5pR0oiAAxB9A1
3x0Un0mmVO64oxJ0J1IGKhWRaCw17EOMKAeRkYGwAlhtSsPUjqJBu0vSlNY2r0r7
sY28mzOeegGX3tiKecCh7Vt8KPwXtNJDZe4FjI7ikQFW0c+xD+nVe/d2xNxDDXaI
NgP4L8VB3QHc5cE01REjUFcQINsMzWgxAmxrQGDF79C8g61HPO04jDlQvlAiQyKb
X4nssUj9cRW3UdhhFn92TPN8/0I6FKK5BCK0NrrGNR2hHso27WAAykYdiLQm4o7m
4dpAK7WI4zLzugr+CVu0bHjDBUoqgEEdRFId7+2Z8faO0x7z3LpyFHoX4iqApLEB
9MjP1x7upY7VloqzpbtAE8OLTULFHA948wOWU6IMyxcITgk72wCocBvqCSGl/xLn
1fFs9Qgw3PvLWIjlVfc48njEFeYbIG9A17aj9uBZeerpjou3FzORZ6R3FlC/czNN
gGerG8iW6pIohheIYHn2Ks/DzhKbM4CjcsaeC4ay/BtNYtnsFW6hPuvBDrT2V5ml
sNdrRiR1jrZMHP1Ne07abEmKxUmcwwl7PEe9K6gn3Q+jDoo0vHtRrtyOaZ/phGk+
BVmRodB+5gPJZlhNitLs7nN7srP85RWpfYQlMLBtEGF98JDtxyuCt7ALyU19RtRd
7vI+l2Zcr2NszuiugcVrmcbwhtrBJQvZA82hB8AVZNtO/8uDTezAmhajtkFBo08E
meiQPDoRvqhoRVaREQ9akzkIXnOiUbeejit4DW5oMYEcRujLWZ7LqkQOIhSoQiNS
2cGyqbBg9XCYpW80S9E8zaCX3V7VcHg/O4q38D1uuT9gN3udnjh8JVJzmJmQmJji
ZIxgD4yZlhEXJlyreV2DcMwmFT0CO/o3TC7rYpbQzrRog6WKGKNGd1HtI5qT1kQr
U1Z/2uzDKvHq7U7ccI9np04e4rx1XYE9572dvnl8aGVKuMVc+K7TueAd884EbuR2
aW7+uJz61Mab/hTYChI1yKxWWSJdI8j40ZRtzQ5ksIJDEH4XHloRJLb9+MT9hgDW
7OyKjrW0+4RP6qRhT/Ro95TNSfcWqcIIeqrx5VGvGYOtl/gCoh0kZQtkd7nN/BBv
8P2K+jx//Ux0YTT9WuwN6Y384cruBhvLH9BVgaVI7hCvCO3U1LPLtvt5zjIU5ooq
GbZquuKC9onh7YtvAVstb9ojT+wgaje2dvEEzCv0xOyFeA9ls//DMPnDqedSnjuU
WzTJzwb2Ed4+j1ZcdTG7u1WHWJpt3V6EFY/JGc9rQzCqwXl6SLxdoycGLdj7M9mj
w1UXu22M+l1EHbAKvq1JR6gWF+ooHicRTcPxPPtI158W6mMd0FTXvCvvRak4qLVR
V+CP2B8o0dsV3lyLAroPjLiX+R32IF9aQNshLLfQ3aCzBoXWVs1D87zpNoIexXjy
yrao3gE+mdFmkm4S8qqifb6CXUcd0b8CjeRWOY4OrjjQZcu83qiudKSTC5GyS78/
zoQxAHyx3J/xbQ9dOCXmXI2sHz092tOEXtxOqTe6yKdOMuSlNpjdElWlEX9xfiH9
DignOp/pjaQdfHkdeuSN7qrC1lZ6oKfDUZXrbbucsUzSXxcOacaJ8xBQdmO2ty+b
UrRM7HCSOLyQcVY+FilxbFFCgerkqJhL0WMOf8eZpgISKlYJJS6py799uwcKlUFJ
04SYdw8pyh/3TYVNQSxuzreCOO3HMeG4y+eP43CL1gGWaUIVwYJZAg9jCY7z5OPS
5ZmjvId122U6CrR6146Fg1tmwjDw9ChP8axy2KZ8ff4bcpd0roCsr6vH3bEUOaqV
NlL2nPiJ+rmFYZqShWsoP8eei1nUC4sIhd2uiMMVhuPWcUm0CiuZoVNOLXTKmJlf
uG3Lxg/cOJHLdYiqVPl9CFZZUIrnx8hfNEWmxsQzIYOB2/Jjd5Xt3fqAyoAf+hpu
VhaSeIOtChi4JcMzz1qTxrREa33xLexbUc6aFS33A7LKZSVUYL+4iY98iG6i+FSw
uoB0ZQ/86KRuooUvJ5ptsyilL4vNUFpXEwoDnSf1Upbd+iLBMMLiKHYVAiAjLivv
b6JlvZ2BvSh/R73nnq9fJ9dIoaK6vHmShS0ZulVLE7hMS+GV23cMrqFouAxNkr4b
1ZdPhWWTePxd2srixHK0zZo7s9iTmC5/NZSwIm4IKVvaf0xFYFUbvDJVSqNoMGZO
SkNqdqoE3QpYQCr4lxuWmzvaMKR4RfXDIoXOmzNuFvPwyIlGz59SGW3wCUip+v61
0bCJChT0pBXe0oJwePAZk2fweAnboMAxJZjXW5LCZ2orz/YjXHCkZbxw4qTyG5Qq
Uo613V2/OYSqVu8WZb4XFlRxvNKmFCmNGslqV0qkG9xQvXdMiR4JvQTDXtTnWHIk
s5xYcADGp/AaaoJXujGdzjSxHD28XunGAYSydCVp4o1orbuURNm9g2ohrY0lA1WR
hAVJpTWGGsHPlOKrlrtZKyoPG2H6KcU5dvJ5iuTuAPQ7siXr66gbP5dwYT41L4uj
UNtr+kRIr7Xp76sj7RB3II+IgRlNqbCYBza2EF+QSIdOjsChvpwal9CigzeK5q6q
jcaLwMLWBJ7pV48KhcpZixJNb+uoFtg2ZQsed0NqNkFbCjJeWEO32JspRdh968Qv
yBzvpBdSxSq+fs2868zDmO0AoXL/aqsq68aGH8IZxv9pfWzAY8A2Fu7E/PAJXJxd
9vm2vbMDiS4IdkESDmt3D0f6EhGW9xmKGozOG8g0TOSfFCwwKGZ/wACLCNLggE2w
+mOxxPEL9gIsphq3HB6Vnlq0Km2Ndmk5XkUQpaVWJxF92VCyodQwCb/e3FVmX+bL
REHgKP510RBpOX66QWtTukDAq3YEI4nSyNkw5Vdnig5yHYkir0ANwzu4YWOEigSR
Engokm1MHEnUUWV+z7gc8mX4Wwwpqqalm3H9IQp6Ztk6YXn7gu/HfMxfXBpphev5
dYySO6Z0WyCHh1Xu0ZLVOyu7+KNXxAzyR3QtMIIl16NTH1ap6SYoA1SaLedjzh8Q
61HMZE0SZlJ16Y721+J3ahUbEidSM9mI5Borfpz2XXUebJBVdVyXHNrqdZidZTrF
rNU236WF91PZwmjfbi0V27Irrbld+08tpTI1yYxjf4+n5EKr6Gzn81Ycy+e4iM7a
ZXp6vmuoXk2Sn3ApbNLyyzmsm/skStZSNE0hO5M0oKrITNaK0qKGw3B+uYu8K4ts
ODLiDdzg5mkZDpqNwAfwYTbpLgonJdDK5wqR+0lo/OThGEK8J8P6ir8cPxbfoXTg
WXeGXI/6UvAClQgC+Sk4Hzx381OFKHk6TkME+Y6Sqz+rZHF09uZgTDZTVzGDQWJo
NKHomAICg6S/IOO8+fXmo2gDghCX+80Rva1qtdpPpGrykXwj9WEGykzPAxMrurOa
rsZGyf6Mzu1s7blKMxFt2adVKBaYSwc0Yux0LH2ca6xL2pf83CGP8Xluz8kC4i4F
DGzZVJyFQxHxfpnQjNEvC7GnprqAzAV9ED9KA2zWZ6APvC4kwVN6kpGKWJ5FVK5F
ehanrsec4YLBcQB8lck8k6uYtl/lQYoohZwcJbpYYUaxXJJCjqapPTckVSqBw+aL
iHoyaUpSfpIDScDYcQP49dvcSdliW7ij7SaTidzyadR2SU626QGq8sYn/0iGd0x7
ksuF6LqNkZZbDO7lSGzh9EvAEUkp01bPU1baN/O8WTZ1nDdxIyKf4z7XtqwLy6mz
Kr2Lh9UyNpfGSjfaMwudzZbCTowPLMezrcD/gn37+5IDMwMz+3/QWL8pnH9na/4H
GktJWVZEVOAv2ua/4q/+dfHkf8dfMTH+k79iZPwHf8XIxv5/sU5MTEx/Ej0+Czvz
H+7pt/T7/TuxsLD+vyXIv79/9/S7/Z/3H5mVle1PYvvDUf7n568av0vYfo3xuxY9
5G/pTxsGhn+14WD+q79/b/sn0f+f779nSo/P+C9+7tcbn/3XOv4537/W+rvdf6yM
/q9Z/OnrX+k/MW//vJjyPzFv/7aFfyi333vxN+WGr0XDysryF+XGSP9rLAZ6elYd
yP/EudH/ryg3/H9Sbiz/QblB/neUG/N/S7n9mcc/Kbe/7t38Qwd/H5H4J+X21wmJ
/6DcGH+p+je1+D9wbpEdEPrIIit82irrPI/TTtmpqcbxwwz+/IjR/MTjFYSPBgHC
AWuPCH1QJO4AhJCtVBsBbLqj8EBf+kjKyivJodpaL8LBynNzqUZaqXFjUy/VWIB3
Ol87PtmEVHh0dNZ1dO7X7pXrnIfnZ8OC6+HDzJUO5TSE+/Sq2cL5ZHUamZN5Gl8g
pqPSa8wP3s5qrHAJRtiYDnXYiLywW5NjGaxMZbIZabykJ3LPOKBQlo00o2rtF94K
zAc/gRJifdjttufWnmMBByMO5FpYH71vCKKNoArHsqMR/aBY8SNoNJfalbHjQduX
qs2H77S9NOW+PTctO6HtIdvT3eCUkMTA8xgIk6AYAxHcUHPEkLMfHKI0fmRdLmRm
WVe9Nwk4B8YO8tHQ7rp5yOjWbxdVZDKpGFZvTZGv3CI1y27S8QRAKw/Lafm16qKw
vPU9d+m2DbGXGHv9xOOpF6MkEYv7rrySNhZxER9e0L7QqVChE27n5kl5/t4mzrBW
I7jHsAcV10h4LhI/bEwRUEd5gyJOI64V90CIIziDEJCRHUVAI7wS5IwsQbYvsb2g
rnyuRw1qbwNwaZXivaeVDx0vnDtEFStKKCOqGVMPIUG2cp0WLE4V+0CYKTyDIHPT
sKEU3PmqeQnf/8BxS9m/nXi2nS/q0Px+E2LN4e3ciO0s0aiRbV13Mb98Uglca+Lg
0eiMqtK4dbAqszAS/aE7HJFyl7sbEavUGLNEQaJQq3ETi4yYMKWikCcxcR4cNiLj
RZIqHyaRKE00LR0qrFURPfJBmmywiUgWVmu3FHaG4WrYNq7QUvJZcIZUi2JBF9/H
23N5eXZpDMo1MojtgTNDmt8hDhbXKTJTk/eE03Np9MBQUxcjDqqIM2OcLyPu9buk
Lia27EwomoHw0B4H0QiPUG0ZzL0CLnZ12YA/dHlbGsyrqEFNZp8WkJjKkb+eHOxJ
kKP7uMLazM/2vQYZPalbGjhPNxlSnE+RBKUe1SWmUepjYWV52vXh+EGdsbXFj+2B
VoKA4W5Ph/tZB1EIM3guqB5cAuyIh/8yDjUfRjw9TlG8m3GPUjHyXMwT65hnBkbi
VyVj/VDN6++urtUsDPgrm6MfQxv4vJFPgA9gCp3jumj7WmePud5IJiCHj3WLWkQK
M5uRtyCLxeQqiSjsVdWbNnTOokzvONZ0ovTh7UAlsBbEv9Z6L87ZmIJSLxvB6ZCQ
MuxbHU9uRaIXfmNx0+xv7pSraYgPTz9QJ5wdAUCwiryaqK9puAvMvqexU+kFcE3t
cMrJzy2l3YUIP4l4mwy4o2G4gv0rQzoD+ptZWNwuAIGVWUynsjr2OYsjbdR9U50V
veSifmJlD7mOkLErzGccnsnGYKjm6Ai9IZzl8Eyt+ajtSm1oY2QOTcxs8nH9PulK
bXzj3EwylYVUfGOQhVRQo3n9vskKltC0YEOjHvaCue9KbXZju7hWmoVUQCPydLLg
CmJeR71r8qYnRDFsv76C9eVkWPS+XVcxXnNM5r6R8K3/7fMWhFccnvDINyKYKEPQ
5QF/cDqoxpR5k5i2hxLtpU/DB0xab5jZK0yOAGKjAF1gzI6Q9PaQ1eW4RQIZ0RP+
F1SKwHyhU6D2Qc+41Tg1/PlfuZr+dzTxss6HWs7BccFDHmhN4dEq+FVCmMMxS1ZP
KFspkzcN3CzlpPMRBfcGljFTcXHSQfeEunTodbMG9vVKpxOXFXzediQDH6KuaFpy
N/QIWI77Lwt4t7nndx8LfaPTH7ieeGFD3ZyaQoj14CZ2M9TRXrHV/otqCfReuCYm
Vu5AtHVNpCN5bSVReg1ML0ZP6nej9lzA7r/ctruqGtfURtHPgLRDN9FNmE1cn7rc
9a9pPGGu4YZu0szrKBc4Pg5d5q2IZLjWURt9EZnTWL1CeU69O313Z2FU6Q75y3lG
iEh5aLu+gT/VRBpM15zM6mm9TepZV0vBukzN6rFaY8cCTI6sLdS5mXER2LA3yzIn
Zkbuse7vX+Jesl4kfVp49fDmD4+FPJt6LORhWAP79RnRoTkDrfW/GNo3mUVbStDe
r3ESvDnzm0saA5Zt0SfWYewFKQATpcQnSmEOhETh8IcWcBbGG6j1KxYNDqyWWNz1
JSLi8StNGBgvNQOWbAwbnL+MfVeu2qtO9J1DuV8l7ygDbKBoLMyMd7g/Z+4ts4Uq
yAA+dUOQxGlax9gxGbZxY2WG73LTyOyaWJ5UYDKe8htOEzaZ/bE36feR3ZPPl5qy
wm5t7XPS0h6iTALG6AHTq9iFiZWu3BXhKyYHi1sf8ZGABnPflu9719Zj5N4xZycv
1FvtyilQT8TwIlcPPPCDnwsYhMlOzDBEvHE9cNlVpBn3HNLD31WUiALxPDxSdFq2
sH298eBnT2AjCqEQll4kcwTreOdSsM0DWo4MAmP9dWPse+64rx2UXcIJmS0SbJ4E
CEbaFD5EBKkBJrKM8GRTGClKC2lTtp1jm3t84nmUeS/T2oDnnTbWqUJ9iz7+p5v9
y1fjeNvLVXqXma3j6x6Z657ZuDRFN+r0fbkGbZQIm/SVbrk+RcXc49KSOncOE89S
Al4feUtLb3lrLT2Hdb+MrD65xyi4FVFSGFy1Lpt4Vh95K72Ky62nRAGY1dDo0ov7
CLN13w+N+byP0TrR63SVWzMYlMX3wTrP61mh51+/Zvc7k5ilMCiThECDYvN2TLGA
MMAMfu1rE2OkW1ZK5F0GX9V05uTw7Ta9P2Vy1qdUG+GdaglMwuDENeLYdd2ONwv4
+EDTdoqsixsPZZ/tTtLxVmSa9mRLil37wGL3ZsrSq0g/eurATD5ZduFUpKoOlOLG
E9ovuj5yhrcSWU3gFytCC0YGYKXmo7LUu2SqxGxmf3yZu+dQM2OFs510NqZqy62F
syOXOMS6adXUNWM+wPyQ04b3EWQRNUNDjkppUqIRTIk/+EKBgsEa7Y8Smf7N4Dtz
jS+bMwUtcRrWVcA4s0T65HpUV+hXicaQrYb0yYICtcMfa+rU40m5Fk7xxOmTMMMt
qyTP+mHSkfMzxOrptekgsQEjTMT4ZOBn2WNo4oMeqVmZHBOTt/E+oKKLWVJB1gR0
M8t7IrUp7ZJyO6UVxmgWRNqgmMK4pKPDVcOW3xrCilsyI3vkBN6rLPBnv4zuMYCP
DQ4B1ndkrAm7ItHdm3USUw3ZzHA1n7AakoDm82GIoMZzHZuklg0TOwp3Bt8RpvRg
awprMd6ntjE+GmcRy8XpzOAxZvZJBxhT+oIxbpL7jXqLt26Few0D74F3DDYHmrtL
QmnyCibHghWIppqamvoKwt0MsxwFSockANcHkjg8Hu9BnRSNFvg3jyKlKpviaQZL
EKWK4BK3WcBxJu5TJTD2MoF9Q5tsRnXz+Vofn/nUkKA2ZGCpIGuaNZZBDKgoS9vz
Wh/HNwNLsd7CqBPqoEQvWZD/xQw1fjOebYgAs6jLCAolQrHEfOQ+1S0s3Zlsd3rV
zH7/8M7LFcmXKn9xnyAVsC/EoSU9hvWZ55kLZgaSM15Wv8CawEtZUxDa3dDtrTBu
Gf3y1eExxl+UKzUYJzErNjtl8uhmRoyJdUw8gFsYl6ArT7XdIpJ1Nv3Y606JNVbG
FK5GLl9vdHLEb0GuR0tP4iCBa/h2z+skv+PY3BM0UyRldv7O9gWAhx9uerecD2vw
oNauQGPG8BjFA8DXaN/0GdUkyTH0wr2Vt4PuvejuMXVkjJIR86kasaMrhTucbVUE
Nv7xmkuQNweSRQnLlyFNbnAW66otbEMCr0jrqK4eRo5DmC9HT5D4PT3LILZeelBQ
3rcZEtlM6ofBRxrPGOyO2zefcd9Eb0X/xERP8QbFwHr4Dk0am2670Ds3DnK8RCb0
Q0mTvFqJ5VzuqvbSjDmNOzahgS6fh7CJ2omYWeIO0g6G9TTb0bdMd/rQWFz6Hsvp
V4qn8R5vO5ABG5JLeagBWvFRcz5PDFFTxkwhtFkrhvimGbBjpdzLrhwvekm/gs3c
SVVUVJ+LEc9qQGtiX7XaY2uGxBovdSyvmHfiY5I64xRuxVRmZcvEQimpgtP8KEVJ
T60X8RdhTprMfjqi9L1ibXyyvXxu5SxqPRo+Sj8CvxxpxQ1F3tlU51uXMufzVj/B
suMivAK8Cru5qsXLuS4rcyDXTlHX2JSv/oefRwoWBczqKwIXhiqOAKRjeP6TCcPM
FuzAhbU0zjBtcY01gvuaOnoLKdH4ZPsgAy8ujWGZpj4F287oOFIH1RfLWCdrN05f
LfcXhyA84DbOY5pvGzihOsJ8yupiVY/EWabifOlcEhJmtPaqnYNO9geHwGrDXo4g
HiKZIdWvwtfkSsieZ3r32GYMPYmWe74gGXIaqYNx4wpkA+uhi1Edwyl+sbwC11eg
O1ZyhEod/RCV/Rq9GPt6xOxB2hKhPL2/B3XDXJyrrPGDatbjKN26sT25xRzL4KbO
vQ1TU5ykX8a2IGomsNVu+XXP0lGeNS6mAG3qNfCMbcb+OZ8xZAIIdE1cNa4/NWmP
s0D3gylTgpjTH3lYrGc9WSrJkXcEZYsyoXvWNaDVLRDuLiUkbwBurAXanQEXe0fg
7QIsO9ZfoE5gNyUw4j2u/nigxpVRqUbBHsfdckMyhgCJSS4BjJFpOGCMJx/qqedk
zHHNAeo5spxM68jmGGuI8Hv8ZWAjnVJIdeBIrDRaY3LH5EBtVFeGXqQrwn1C1dUr
jGlh9g2jBtVnUiSJS6pLahdAm1S3AR6+moABT0jT2xe5ZvUTfJVjBGst02/14Jde
QZET3AlhikipSaliovE8exQdgoVHCd93kd+ZNh6/MGZGDVMnFRaZGWEvGCEzRy7M
b/E1WQEPxpxWzd+3FTfaZadtdHgqq6m4XqpON0h51JbX57MrKKPTDcWIEHlsy9Nv
PXrw2KbM5qzYqEYsGzMfuYRTM0iOgA2GMvcrhhUmZnzT83ZA88XODginQFNmLjAs
xrwZZS1B77KFlH3PLQhJZvrIK0i2Kcm0k5hXpyk5V8TFwo4pgIUOH1w57pu+/3qJ
jWz3rUAW3L35Kxv4EiQ7Hx5a35dXM5jwAnMla3vLoVoNKzA2mBNF2aZUGeBd4KL0
1sQEG1ImfqYfiXSd5r+8oDwg/c4en0YGw+odFKWepx89JfzYKTusitNbFLOKeaKL
cLjII5N2R4pZucBFA1WSCJUUJCJIjPLcpAVY32ciBvtMhQYl4rgMV0e4Fiqt1IZV
ZCRG65/qKRJOlGaQ14zsR+L6nMAKvBfxbj+9v6ULkWn5bC/H1rtW+7lGsum2ubpQ
N3g4v4Muhtw842Bi2sNpj4aHMFfgBIhV9UrD7La6h68vyGfnNm3HyVNH9GmZbNKV
3aOyjIcVRF4DXmtYHTIbWAZYKRmPuTxX9PxopHJKBAEbXIguizksOhG8DqEI/Lm6
Znz+/bQRrF59K8WsNdFOCWfZf9207hAg4l5Qn/MLj5csfy5HaEgUB19t4iODLwRz
j7K1JTRPScxupuettaddraulnTTAByZ5paRMb+SYLAYYa4XK65VnO6EMhYgld+PD
Jgg6PN/1PZ1V4Z6ls8hJFwTf8PUed2nBUaKTPWWqdFKSA/I0XF9Gbsx7n0MM7f7o
igZ3p3jw+1jUF0ZII66CHDnQED6+bLkrnHPMFkiwkuTp++Vd9BbKOcl6yKOF8rDs
Y3a3AaasbAsOt4O3fRkHfUesJrMwMhPxjE8ztY7KnrqX/OJHPw4eHi/fpaUn+uKB
mh6rdEd1Lus1uujaw+evhmv2tGAF2sCnBfBCOKHq4ohmdZg3LaTyKac0FC3gn85A
JUUNpzDdkgpCRkKKlrP9y+09idnZeamfiyLnqQlvlApv3hoXLIo+8S3Rpm2ZJ68R
u3rOk7WqmKyw1KECdXptC3cRTvwN1nR0wyjd7ugvzzX+FIy4iRpBfvQcnrdz8JIW
6IwZGGCUiPMwOWvbdJghjmgsWzFGZik3BFupVouwYYMh5TaaXAU8s44q3IUDixeG
VbVqi7SY0LYpIhkPYxdcgiUEp5j0hnXmeLFgRMCN/cdp06vMraZnfS869g59C5Fl
diaJMNaYU91FwTDYatlYqAwE2PcMoeoMgAP2GJNZRKMe8Xr4UvZv2Fsf5G63To5M
GDHOICWoFkCK8GGLMGJpASDvCIN0sSLkZJRIjJkjILUKHoFj3Qx0eAvzsSXFXshX
RuRkw9nxttgLmxCrBana4fWQqLvkiUKxIdsttInAR1jGMDM0nEcI7AcW8HTTXatT
nbDnkA7eUFv4F4OZ3K753vmIsUAoIALVnvlEOOzRcVSOLOxD7wxLkO4S5s+c5d3o
1SGGATqG/jRGRK7lg+zflOqdw9ai1oCpfpJF047p+0GsMwUxQhfhaA9+NRT/fE6B
w8AlC84H5/RhkL3JQlRHNyGGsAKoE2wVpDv+UvYjXjnOcibwDpnmKYGnmqkxFi5n
8KEA5s5WHQFPYnNYLPG+1eNl9J4Os5ONQ9pI2i6VTetAI2oBobH5HKWtkNapfZ/a
vrFl43rOM4G3363vc7W7XF/pyr6Yt53czjqf8ySKN5aPj0/pavBJDMLMwWC4eEbg
KnK7BtIXnYDny3zcJbngFzpMDqwEzglLSA4hQ0cwvMP94+lyCQ+wXZc4U8pGI4uf
JWzFllwVK7Ksy9DkLKG+CeeShCWK0vH5aNgx5bdk87NRmUVyxUVysa0rrSsX6+ZE
MvRiLlVZHaXOnm/clAViF++7V2Feqrpq3grcEgnH015HcHMP49sTTKGYC7bez0nO
zDiv/bdFVsmIqrmMeRIFfRZ7PPQ28eQjrOU4OhbATeZKKqy43XA2rm0A0Q0aFUBP
mnXp0tbt66gNDKtQE9p4LSgfeO/O/WF5rez+eklonrEjnGozxrVbuTunahep7G/6
nsw8kp+dZosDDUif3oW3V2zHlzNf7hwhnKt5b2S31OxoJFHRl2O+WPjnLmKgfTee
jYHUkQcjCqz5un8T9rEHfq+8e6XUQGY5b9TQkL+jbGN2XnKxHo79zHODoxLtLdcZ
OH1n2PrB8ctVewLpMIOia8pH2+KYLOArbOoWZY1D4JL+3n7ocu6cmPxDkcZoTtgq
DAJKXpFm+n7hEQPi1YCgfnv8+9H4weDFYHmGJbeLdL+TlQTO5DyS5SHEif2C86Xq
fN7I7sJxhNfDWcNtd/EolZWnJBgsdScRAzd9sJKq38rEQfVzd4ojTfU3mvgle07s
mEgkVGXUHAF+XWcyvzqjqJPDfMOnsIv1IcOVo5O4y+NJSYvXaBzsFFciragNqXzx
W6aN5RVrtCZED6YJu2QROjk2ViA7e6iNknUwWOytxZ+PPZZfQxEx2iLEU2O01lnK
eW5rUJ0W18gUSG3iGw2vbTBy8I0hQVK+SXDKLjlsDda5N7e/e7b7VXieBKX1D89L
LhrvRp3wRqcP54eqKrychTj78D+/kK35x12n0hmHzgC2T+btNjFMmLMo0RNSXXyb
P2FqNIuGwt79irolbuoMDzXIudOgHqvljlMCEIDD7wpw2btJXi/zyHfpDOk2EzWY
yQvWCLmFRaPPCuwIn7QIP2+4zVHF5TeafblcGAE6Rz/VldQ/1hWceyDiSLi8Tdkl
uVBhajVmdWa3gpy3cWYWqJPiQQsDDR3lJHMjDRkJMT4/ySLnMn47BsMcXGm0eJSc
WtVUtbBetVncecw3tjHbYfbRjcv9uTMuSsOnuz4uHqbAwrgbUpyXys9vyTo3oG9L
X0twM4ATAEgs8BkVkeBN+Vw2O9Bvv3Z34IdcktNTwOmlquLZIQufSqsrn2FfslE6
kgXLgkA3dTow6WN2W7tQAHzQfrvUtrjecbq8P5rt81C4n8Ja61YsTedpcPPgfGDP
mel73v+qlxuTf/n6QNxO4NSZ2hG+O4IgvYUxlhlmPW8Yb+qiPJmkVn1/Bhj4FiAd
JVxEP1wsD5X3KpP7SPohGzRgT5OMBoIGeJV0AI+EiYpkiYQUrrAA5N06MR72PfuH
yHT5g+X+mrizkjk0LnEhyFibBU1HlLGEkQNiJMPhc+/QHOwlCMHCs2UxMLI4loQR
I9/F1PEdD3+wypn0/0PaOwcJ871ZnmXbtm3bto23bNu2bdtVb9m2bdv2fn/d0zs9
072xE7txMm+cfDLjZsSTkRl5//kc7V+3ke1XyWGl91DfyaJezA4/Jr9Wrb1GvFu0
Arsj+/EzhRrfNGn2nY1czuUTe4g97OnySn8iW9IBxaVRbBGiL2sS68EMCAQUD24v
zSaGpNmwZU9w4waKNsHhTnB3X3+V7L2cmsN3vvSoAhzMO3CtbDkyvHLMaziB9VOc
5Sk5dGx8h0cu31u1rcykyPWpEeA3LeSit93cEYtg/jh+WR6Zy3X18yovzfV/9t/Q
/en6HyTpIJNsm1qTzGvP0+fazRyv7DxQfugcGK2XTH3HBgS03Yel8MpP2i0fT4Je
wBLEJtTodJUguVZ+HOewQUFhDghbQ4hQUisRGzN5W/zzfI3Mx9s9O4Eh+zXKpvRM
n1uDZs7axbR1KQmvlJcVmlhcF/tJ2j/U6VOuTUI0fTW7qaKudymLkjN6BHdcVpdy
zmx4ThzvU0TaNpeZzQHLfzhrCADlALsliW10FuYUjsblnwaiX6/Wi7DK6dMZzoCu
MAKVytKezbwY9eeR4X07jwOwbX3Tbxy/78rc5PS/pqri5CO73ox+Nypw2a8/rUe2
9Hm7Vlzuvuv0qv1sZ5OsSp3BS2XGvOm8AiglN+KzOJz66hxoXsIgj8szm/f8U0dk
1TqH8RgzpHgT6nEoYalLVtqWD+AFpkb6PNfe0vn6zRLY5VXsQ13zA3/Dm0pr4YSO
QOqPhy4vLmewXPQbE8kJotQKNbpX+ldU1TzqDx1HG+NZRrjlcw5zT7o3PHO8Ulxq
Pl/mlNWSkJLeInPXrRs2/vAOOxFa5m7V7oPqhQ4WJ2tYxLFFDRN/ujWRS/pPL0TO
S4NuN3NlkY+ijWhMzTJyrhTayUHsJOeTFJBheHpfkPqSNRRE9ea82MJ2Cbst7iCQ
4Ga+m9mq7sjdjk8bPgSni840yZGGQAzwGGHdO1amz145B6r0DwjUODsEVaWlPdIw
OnzonfY7OY2RK96Kyh2ARkDazHud1q59vMWoprXnnJy8qDqZ1jm1Hvs9Z1m9zuYw
Xp/Anh/eftMJ293z13O5PD6MbsU1Wtllez7WtI64djE2uWwchXWK6bVXEX/fzvYb
Be0BVjZif01LIWvJm3WbpB4LTjalstNOmCyYrOhPJiJzyNFwSdalTyXmaghcfZKu
00o2/iGdMkp5XpiE0GAQQN2qzginKYJct0vcXI9OQxkuPhatkj3lIASgS19zB9iF
gDSxLOtmqdKjDle/1H7wOmNfI4xkrFRzYzWkimKEHBUfZgWIvT5q6nNd2zjnYlzQ
J0+KCUTMPbgqUfvWQfVW4FX16lhRHARvLzV1WS2GSWzYvMawbdAzDplyW/Ef7a7K
qLIsDqRjTcxOU5+0m/cfF8CetpmfYk1NVWRFo1U0poQoulIaxCbBzt95yVeNpZLf
IuSk2FzzoPY6Uq/r3Um9ESTnJ73m8TpXPh8VWHp1nQE9cFjPq+OBxeMmlObUOB3+
1HwnmKufRrl3H5Cb4Zx21YwNrmGTevIdgy5AhBBQwEz7zJZq+wJGcrkBNrEfoHCB
2rFCf6/fc/GwemTryHXoNvWYfRAcM3B+tzERHF+TPTfdgeUjC+BSSRs/dG5/2byy
zZq0adIWJMqMchNpsgkVsmqywsu8XJJ2zegZHAfXkY26v+Ekq4JeRr3wVFUTJPH9
Z5P6qswraNIkurcL53ydwwu36ECXWO5c/nvYiwgtBEtHkpo3XpJglZyPeF8YE5sZ
KVYfYlwFq5sEZZpgIAa67G+LJrz5Abrur6Yz50F6BjR0uCKMLBHtN/zY15W1qafj
9t6RaHZrdOvWw/Kw0sldbnieU/YzJ6m91OJ25fXVv5Lgovcyi74wSVYi/3se06kd
51hjw2E6A5ybJj5xNoazGrVhgSINhASbIsJC3aJFiCQsJThkwypKQanECKIJKxfz
pkJ35xN4+s7A6++EtRXgBl/ey8+eFEO+5BPjTdY5BTsn6DnNTMFAwTbPScemnlma
Z5p+mI2mbdnG5Z1lqPrGO9ipF8Y3QpnPIY3cce/Qf+eu2sNRcEoeaXyvwce/v9eN
Y2JyZhbew5whT5Kee6+TVzD7spL9R1yxiYoM6W88VBW4ncMDaS1pJfaEbPa0qHnM
Sc2j7AvtU83dOB9FScc9H71feV0Oqq28aQqLwgEkXTvI7KSlpaac+vyYKhtdCce7
ve2qwHN9ZJtl6eLr0B/Odv9IdISwDWhxvYufDOSLYubN7+O0qZw5vy/V6t/cDJuc
VZyO59tz47gt36/hOC6vmC6roURy/N79j9Ojhr+c26Ful6/TYcpZC7u/HtcRWfXR
Ddl8n520dbnf5fftoS/it7sdqMAMoF8zUcsK1JrF6y+aFdF+UwTY/ZMcqK7GKmxa
1dOJQ2/x0ShEWkaCnQXrb/BMSE78GZIuFGgLqAp4wAYiQFHtuH/bXN8qkImXFnWw
D1MB03ZY4fqD7n6iQkCLiBPl8G/PnV8yia410vgYq8t80pwfe23T/DwdtrstzD5k
PsHpF+rOsOGdvDxpGBgAYJ76kediEmjg/mpKUCykPEqcGVp7r9bOfIXLUUZw1CAW
hUBrUPyW9ZEBklxvxR6bQxBUcTgIZDd/ElI3idUCuFMDcD6lQPGi1Zp5DOHyAvnw
cj5NaxGipxPtiY8js+ZPZIs+JJ6FM/C5iwPcxeIgp0KCi+jevOt8DxvPWoJ2EfrR
iNP9COQ+sn+/f88kwOSKgvJPvYisiWQHej7fLSjdku5II+Vp91yVYnQaFpyLdejo
WWpY6xm1b3h238I1ptYmqWOqZdq1VDfunHtt3ndMagJIWcCOBnaFD1O5z5OCRfip
RCWP0JAckKM5GzupfzjJE017xSytzZhaWjau1w7n3w9mGapfT/3z+d7RPLeT63ce
eV8ZMJ3lFOU7meeZair49Eg6QTHH1wCGJSwj4LDCon6bdChIKcKQY527QksahoVl
SThTnD4/BJL1zx85fsldxHZeCCkWPqXJfH3fia07mdH3Mft4+rwtk9/1Wa5sb7Lt
9BmZYvWhW2dwPU5Ft9O7j0ah6vabORkUZ5ttq2v23s3kxRSyGP3YnXdosu02eVha
bs2dhtlleDhPzcrbdJxJPebABFT/kl2xdB/HCYGgcBQAyEZLmiINQLgBkLMk9Rb7
hmMsgTP04fqKfShuJxngpSC2SZw+ISuiQLUsVg1RFWwvBlRWHYq+lWZTAxrGkleJ
DOifchJR4UT/PnvFOQ8W9BEk903N0cpAyIULGP7ll/8+bvo5VHRfmIVfqPwEoX+0
vKfuShs1k3jsegxiPlwFt4uuht5B9Jj7tLaXv6O+PW1YZFwV3RHvpvcs4StZdK5O
n9zmiB/Pw18cliIitklqj4d9XC26jZ5oPGLbgQTZXkZg5mg8TDNyEeY8XbTJluWe
OUwUdmIYDcU5tZmyzMJJ4djlpeeebdBdgPiFjP5TYPBizFsZxdkqKukvo5F1SOYU
CBXUT2xvMR+1c6w8ssNRSX79/vCVY1bx8/xMbtv2kxfXa5/e/by0YKWdp+t7aOxc
7fkdOKn2ZZMwzG9Ix/p1DaGKL+MHhb+Cfn7du06tyt/stDt42ed4Hxo1Ru6oX41P
bCTSVJ2mZcBEzTXel5y2LqIiZW1EvejceU5RHl/EAu+Ry4efpDlHsArF/GHJ++rc
D6gw2U4NqQISlteXxz82DboXDD8k1KdbEaY0S3Re02QR0ZCifRa0iVhy13mNY0Ue
eKm9dx/RV+VZpRaACd1w3H9M6Kpq7xk+3SLT0BDBAKEpv0mADQ0K45lRPgwH3pDa
YQESaFiFNks/VheTWdgCCtqw8fUF0c7U2OdcYidX4GkCY7qb7V4bt6UIqQv2U6/V
gpykWJUbCgn+xXuy910c80YcY2/4socnw4cZH8SJq38SbGPsCdlD9cGOde9K793+
mrTKwn+2i/r2U9OrxHSf+pEruOLrP0PnPIO5U2b3UFH1MbXTvA94GzCoz7v99LaA
mMY2Lb0LTo4uvAWjiJW/ehkRM7MlaePqzlwg4LeaCuyLABKZqawFTK5Ax+18iJqg
Xr69lBGqOULmEtMs6KPsobtakKsyDVYCKEhZtKR5kvxBP9lb/duIaRJlnWKDhOaK
qhm6bDJ3/ozWByai3zcLdlthio4Xl75zMEJJFrD+mx8wKbwx9CcKWx2TONIo/IxE
l1u7GLNBfF8atgrJmp01CDGDtYxUrPSyhLEI4chBJJVtTEVsqcwUz+R8Dr9BAptm
aSBOtfMnP7dmrvUs40f95fWHiic5Cniv7u0UvBAEmKp8UF8dm0fRTUZmFvKmVVqo
TGcbFTCZswgLqNO0pcMuz2a3Z1nq71A1rHQGIjJa/4B6lnUazMe2PUT8FHw2N/sc
qQ78sZ+D+8+BUs/RRBrSMFf3UOXP0AW/Z89jwehO2a+3gYRgm9T69yJCBzlvuGwx
tpuu0ymuzoQdiK1vRIYjhOxiS9RYelLBFj/5pPAB8gHzwfSIdkzHen9ViuiI6SPt
BK2pbsMqxXvUJNEOT9H8cXRySkpqor0eyCFaiHEoxhdkTshnnUt9azMV3aaL3AyU
CxffAxdwL7fAVNvMtGiNrY7iANKJuoZMV07IYUhYayPI5CMRo2AYoy+e00SGN9ye
jeIjcvXFI8CXZvb1IZ8/VpIPucPGNJwCMQtRPANc6CDNzM9xFw4HMBHg9NKKCocl
AWBFvtX+eCAxdk+3k9LsyAFLL9PlgcSQYbSq6TjEnVjq2oPaY3RGa01v17Hb5UJv
IXrNlc95PSE7f+aP/0wvE6O9UZ7Da610b/mV7Rrr90RZVeRr89TWypIu1uHdDIbv
+MACc9Zz6o5TWHQ7XAF98tSYdwEN8OwY8e1V+sTJESMERa1IxCt3reyJQrSKVllg
L+20FWHriQ0BPNWstLymm6TNCnt12FhDl98xp/UMj7herkoptUNyiPF8wQrkzSQv
MlBTcrsHO8etPR8Fr4EXQ1cI3/hfjh8jJ8JAkvKO5XyYia+2lmIxiGE6UtbKHAXO
o0iNYgURtkrIzxISxKApGDGfiPQArPya8xFsoIQKDJuzwvGR/Wx1olM9krVozRNg
1BwvuYJg+gK+HBx6CpBfBzQ11Qk+n8BHwhMH7nYmwtZuT8WPllm54t+POTWuu2V4
C4/dbtW6n4t1efLpX+9l5DyGle9N5t4i6J8vzK918d2Lxvfc0cXdnW/Hj8kWr7cx
h2g6YDHqPz2mBTKpRFCMQxz7jWYsnbmSv2beXLBDSIffg5zeC9/kfBV57Kbff+7u
o0jjYuoa+YNmfp6JPIFYtSIKycU8D9nKMqTlkyaVbe60u4Q2eWuPncYA/qIsYvfl
wxj0JPZTMJsuYf+hLF3sh/9s6XMD2O2nBQxWz8bZdPjqRjsarGUZmWL55xWzZaJn
ak1HberHOJzR13h314DZftOnEGeGXkhwcn/+/nU3VN4NzYOEmIFDiIQqHYkIU47S
QAnqgei1m7Zst3J8jvls1MLUX+f4SBxWtAknFA62EH61TXfHq98wnQtd8kd0u8JR
Mp6jajIwiekhIFgRdAUDUDMV1MOerY1NP2T1zMIeH46Tv3YGnJoM9ADgxfkyzCK/
JNmXR/Ijam4BZBZm5HS4cH+Djbj2PbTWWvcxLek6KCN0nMxAoysoC9zgU9oZ9rQM
v1oVA71equnYJtSnIJmsvGL7nCJ819yV27xkGz99DNOgkXeKdo55suj3LNlxb+fa
YVxnnWdf5yd09ziD2wWWgRUhGcdkxOaNSM8doOGj07kHaNuNiAG3V7KnBdCHrASL
X9YC/AIZAjg4D6L1YJnN3XMqR2YGKYX0hgmenddMncOavW/d17Q8dMRzBjNyqiDp
VQr1mQRpeVYqcDRUjA9YG1PpCH3xjoLz6KHtdrrtf7qh9cv38Pv2D639fLjhL/2d
eFl8f0pQX5T3cSfp9hjFPxvaLe2Vxy9eZmnOyfRL+YExfqE4q0ZesxEV0apS49tm
XJ0OrRjcUi9XbzNpAv1oiXn70qFCCGI2RMjeJlDzhcnuDXvrxAhsIBjuzd/9+C2e
wKmF0ks6/AjkmGX+7AsZyphy/Bw2sn/rs/dKf3yTawiXxuLUfhXtc9Tw7QFmcPNB
C4rin5C6xeS7zQ21W7ArXZ3DfuHZcNd81V5spe60mTnnPu3NvrnyFiy8VJPpGDY+
Tn/EMMehwTVWEJi1fJdriuHyCiUXM8M4Ee+nasdgCtehfxDa6053bxjqj4iD5lYE
BksAzb7OkP/LHbRMIW9LT1EbuvM9/tJ1YOkuJgJJrZbM8dt67RFx5dGMfqr48LhB
ChBpnRZKHxPDKg81C0/PqGfVOeObZRHzzXfZ9OL66bCJ7rps2jCE49o6aOi2RitG
fqAfpJcEx9W+XPgWI1ZHjxFu0FBE3Bl++pjwBcSY59u7bcssgvQ3jPCgaTIMQA56
CcxehXrPrnQRcn8Hg1pHZU2JAhXt7bfOKXvYtb7ttz/uwKf1j6hMag/2+0RSJql/
HyN/2omCb4MC/QlXhBPCmdEzUad7v497Nk+j+qnjDEnw6vKfuStW15a4wXVwVVjn
BvvVjXo2bJgljr68bAk2Wp0itLaEQolTTLj0KQ/W/tPn9gMldTDnSOglJNvnr9G1
DR87/d7fnH3SQ/rJbE+Xr8DJziP4T26fq78xxDdeRNuy67wP8Ku8X3p6ivvhVQ3m
O98rLt3THzNVJZV6q7A5pGrA5P3Ej/BnINvp4tS5VLIpWSUljToqW8KVkPDJdPP6
qewcXOX2EvcaFYL8lLcPiZu6fznUO9pPQIYmgURP/Yc4899w/EfSB60PafxHNAFi
mgCw8lZC78RIV0QIqZMjozw3GmaLzO2Hh9aC394KPU44V9r/Yt6c/1xOrWrXte6W
6+mu6TRLaVn1bHes+JZ5au/Tir5qsG+wexK1m/TSvUOaUSCykElZAAmSCZbprPMG
+HuIVevWQm/jGRUQ1bVIF7eFo1HqQfQoa61ohTszihHpSZpjSJ5Zx0i0FypimKKS
N/K3sUdB2ag1JcLTsgYTKAz5X5grGgJeONuLu0IexFp/ed4VIIf3oGvFxTdSxcwr
QpRqi7Ar4F7tJZ9cDOBX7M2f3ZeMgFCWlGSHbFpb8/grZ6bsVrBoRLgVQiqcrR6g
AMDgY/D7ZysCkVO/eeZ/LlGDCLHD8YNlB5UQsCzlqZJXr5LE3V+hsLMWSOzDhrhC
BUBNcoUNUPQ96nYTwVwopyahokGHwb6uuTt9pIxePw4ETLhorm2FREjSa5L/7o+E
zMbgslbYee6crTPbfdysyn/9829h43e/vmTM2n3++Uy7Wsf1OIZ97scr8FtJ1/b4
ADgdBDYb/VlK4sXL6LN/Wzrt61VyHduppsfYWGlpK7mLO1nLt9b1JB24egG2Xo+t
oxjnrls1QIRhTxRot//XcocumVFKf2GYomqvlkrKTWEiDHhLhBladDd+8aEXuQuR
nA/xEHzvirM0Xgw2DaCtyPAUmL+KMkajW+SCZ+WN0wxMc2W3G1ufA5GQstY5t4sN
V6mavudtsdfdDj/oiV7AbvvIZzq5fnXyOZQdtjGNmY/eudyyvc4w3LvCMOPb4rhN
145wCtDMJmvmTE7gfOzCDMDxAxOZzw0Hf3lAx7xpJD1tpKuoq3q8c2wz8HptRWRK
pAEkRRVcVoh30HClHhFgFAWA30Q0V7LcjGOmURiA02dp6Wz/AnO1zckvhjy0Kv5T
iHDMElhog7RhSP14zAKQNx/K5NsZrv182eKc+faH8XuxUD2sx/3Qiztl26zVJ5nv
c0h36aOE5cH6cgdXvZvqQAGBXexpsi27CN88QinRPpkL+QdrYVHx8Oq8NxjGRecA
56KOPI37Iiftc/kT9nVTM7arSgULhoR3WarFJJ5pjGmKWQ7TrH2AWTbDNONSs5Km
ZWuvgRovSqQcmZvsaqqPNZTrZ5QxV9lRVlYiSqKxkCFnx6BPKH/YqHnjyhXaqDMH
r272NiyryZWbrX/I3cKBy71C9kkAdeTHDG0QTTrShGjYINz9yzZu9LYZIwYxDjl/
MUAjLf3Cvqpy0KIZ4wtvGI6f0PAskei9IdqIBQsGAsHItwyZD1N47hS68jvGmSUC
EdoRPlEMhcvTLDpLJECAu9tYW02CFQx4kDvoZ2bGIH+R3+juSTAvL00eh/E9bpKs
C99PPCFfDB7dkuUVSiDrxyRAU88mSBtAk3YWxNkQTD0AtxYIXAe0Rg7ZLcIRvb9e
BZFqUqE9ih7r9WRzvk28PzTzGk123h0BeuggccRb6/jhw/NFaF9kP1A8wNEMqCSu
1M79UMKwnv1F1fv5NOHePm1WX5renfNbrWHnVK4Xsqui83bHD0UK3w1sUf/3Mpbt
nF2hFnt1uBSe9xEE470k49BR4yaMY0CvOkrNthlrEmjFQLOipbp6ZGNxkXqp7Cqx
UczKeB3n8qqx1NaqpkoK/4kPxXvlgpLT7EXojoAvQnlpMeBUyhVMj24dnUPjwWxW
nDRUUC9yLl4Zi6em417O/sapthgvG2r08bCc/kI+NU11dYz1OG0MPU2egYXEDMOU
PE1TzbjhXfwyTlK8zhI7ZTlywFLfpGeTv93ZkJIaVn3twvrSJssaM6tx/O/yC+3X
MBEbVIGHPmQ7FEAPFF6BETKfaVYsPVXfMJWhy0V7zo8XYlUB+CpXCagH/9iekbKJ
BlOanGIZwpn4nTbKsTCbn4+chF9OywOUCZ24/UF6OAegvVQ6JADfEY4Se48CD8So
pq/G2kztnPUwVhxGOGkH6V+yZKxaK8d+kP3vHTlA51OXTNZA0qDMWKy/7aErAr3c
Jc+nbk+o79BUUK8XcBcaKuplxlzxGM0cDV+Fj9AxcjSTZ8FQtcIAMDrsAyW1lzuf
2Umg0Pb1H0kMSEl7QjGnuLT1OEl5PiMmz4wiI3+CEEEWhT6HBXxiv0+7K76CNfRJ
o6Layg+o4SGo9/nb4tqrBPS34AvhEqcvAxbX0OUNDCfBTHI74eckKnP+Ws2s8Apn
0d8wvt7JaLG6T0dePij9gIbZ6j9uUSyfUa8hv+i22O0XT7w3mfHmjnWafMWf2mE3
OAZvmsKioWWgObeXGzb43eMONlOmuXa/HGVs0l3I8lNBVpEOUtPZdhgdia4CFKkD
FrXbzBZdaDWHlRs1oFPxJvdHKqHLimqyQPlpuwu4KzoLq6yOql7WhDz+NBoUFcxr
2dk96WFmG6eb5Zjo7+kiXIX32HFeceO8DT233F72lXmIF2WYE5SqrFFvbSdzdZbq
mOKXTCnAnX5r/0i2lONlVRuToIApZvIYZq3ru4/JqDaBffYO04iLakRr7pVj7pNY
80xB3Ywi9EkGCA/M7WlA7ZUjlHaJVe09WuhBSWPuWDaTNyLUqSohGuOiYM2ZZhaS
V+CUuKzhh9svy2gR0Po3aeGJ01MphEABSuR4g8ZBqQhG4c+hSFN3VaTxZwLlxXe+
E5sTMDWv0g9hIJjdI9EYuwrVC74jugfClA8gQvwGx8VSC8x5psYPQ7BVOQosBnCW
EQmUaAQWOvkqRrp6lNqM/636S7eysNvdaEZXhef32oie2+G5Dj1xM+NXh9/u6+f0
sfnkFTcX4zW667BXI1yH7y/GQOWkwwXoi1qM7GR1u/wX1dWSXRnWSxy9346Ke9C0
m5/GOK5A3G7Prg7dri7MFgrDlc6xRyWZ5+7mUkh0WIqbKBJLVGReoShEbBBYF9jH
WNfYR7aWbFf4ivBc8DLpIkkwqh+LYdqwqYRzYjlVdAXtcjEVdySnFBctarVx4oEy
yRo06Rr6mvoqERdQbNZi1SXoC1M0c64GFiKBVwqBVuzKlVml3skHpugyhA0Y31pb
EOJW3VxOjBCRsA6hLhhzbuhKh+aEhOLkKLG+7C4/V+zZxd5i0524O4J9Afql8hav
cidtsY2BWvPATicReg9dkKwbW46GM4WnQaSLG8YuWKk8ZvRO/qwmvRWMA1Bw8048
/Gz8kYsqj7PCVXuntZcz+8d3PK21983Q2cpgeIh1ltfjMrvzzKYnDW6Bx9IzoDFF
Gx96Oud1g/u225O5dSjMYCbWn2h/vPSwhVxW5i+aZlVNULUUvFvc3bF1tkW0l7U7
WVapDLucC3sId+EtlZ+DD8rb1HPGp/YuP1Ae5MSjWNE4AfmqoaBc50dt9dzG8mbY
cz2ccVCN8FZaMD27bP1Ms2/p58AnMq+JcoV4Y8Y+ASwgPg4ICWXGt6q34IJecWUY
jsqwkWZS0TDgwhFHAqlCWBJ1O8MVYTNHkssZBxgnSH8hWiUJvkNYTBxHbC+iCtQe
uA1AHu6oktm+XjUHzrzZE1NeYYKnJD4iBflbM15CNw7hcDNkQzH6gjh+uEpch/8C
Fjo8v0NuB4dPhMDFhrH3TL2tShgB2Z2JoFkUtqApLwc9GPOMHIY5XAPS6bnMBa/P
bmSvDu/ptnYmm5r1bXS3/XNj2d8t+2vjKjxdt5MIWRUt7g7+pm+WYM7dnd/OVfje
7rjZdQb7eYizqSBO7Kr3QpKrAKtmRQuWWHb5tBMq6JjFaTAKN54P3eghRhuYsIcB
HnrXnrqvIz7c5E7uT5COsE/uMPDPMHFuRGic3INs/GykHjW3mlMW7mv1Btgt2+d3
MY92ODqPwRfYC9PgzHJHCusFY/hxJx6aCxz2SwBWgy3ENflbl4ABH6xsVnyoR2AB
NnuYPnUjJQBn85GDxgsUIMdARRwbeimVR6XL2WHrZLFuVcsCPWqaKj525QZoUyj6
wIwJJIwBJ0EDvR9L71K6o4iY8f2cUbHy+leEvQD+gq1BKpkToBRLbvRVKFnNIXLD
GHibM6MbM3SSVJev9ud3ouaQk6g39Bzn45sHO1efjJ/UDv4vaFepPF5by26bi46Z
QevmktfgzTR+afK3XHPhqYRgm3HS87hF/sqGmk6zeS912OxnljaIl6x6tDdi76VK
0S0xS3gVkA5QBDV897GH+mfNKkJz2oZSIFxAzr7RIhKMmhlmDdIoXutCvFTnzj/e
XhPN47LbmGlkn5F/aEZ2gP8OgTd43VrqWY7bN3sCFwDGJEkKNAXKhGtrhJMOCNHs
BQtPhJCRQoiH07GPeuvMurAAetMJASs8JoXTEsm/AXud2SbKyxmjU63sOtKp8DXf
OT6+qVOc1o/I93Xrq2tD+yltQ9LMuNyy3XFNx1AAFumZ+YcWD1iI4XB5QXBHJJlQ
N/QDOTeC1J7gqXqHoBJBWsNeRI4OHj5rsds4gtppuq4XK9xOMAbB4SXj6bS62z7H
T+bEpYey6LbcXMH8s7J4Mj+nVgCJs9coZ82Yjuzc0jnqmeJZq2E+AX2YmIZ08+ga
2Vr0qfAI9wrs2eGZ/Eo638XTXnX3cOh17z2YjGRPtqNbfZ261dRS5xviIfGzP2/7
cihpelZ+LEtlS2lNxqfjy/2V/do0CputemxusrEhNUzTk0BiBRvMmUxAWxCE63e3
M2O3TJHisGaHpYPQltGTV1VMqRi75T8qqpR/ZH3X8nbkjFZh69E5w+XrXwkWo1zL
lK9nxasmDSztnWhk3YkEtztew/Jv2ijBOfeRvm4ORxGBft2A34hbY3bltKxrigvO
R0YxBocXZkA0comH3uTCdh+7dDm8DvjzvuA9s5NI7PjCYGanAfsLD7fqccUSdw+8
H64QYryuy2ufTv/S7zD6rlmXO5yP1cMxTF4PPmUiJxoBTaxras2qDqfjeYjVG0Mn
7WPv2J93s+X0vbjIv/a1WYfn/jFyrK3X9bNB+9w/L5qySPYitS1oxd+Rt+Dy2pqd
8zjYb5WXNvGz1PB6varnF+PUx2ovsCRkef8tDd5MHcPLaYdhsWWwZS2DyR0tHk0e
42kUjYWOqR2d5agqHoNZRBmZA712Gfvml+OMjAaBkmO9cB6FQmSXyD5J2S7MR3XJ
dZTEROwowxdMrDlzYfjP6i+PBb8Mp9rfWMYE2Y9qhVOAlSOtBAtAEx7avykzIq6B
Z4ABBdhbbxXdMhPCA9QD4mVw2f3GQLeR41wIJwAEs6G0pkb2Z7Q/yIzH8WDK8Mau
HVST/n4m70ZlCHqwarWhW92u4dbAyyXOer3G6y8NxcSNOMXDW+W1hsJmMY7iUcKY
HJWSimZxMwUm6G7yAXdoZOMUsBvS1CAw1ZaIObgKkZhBHX6gK8khzKpYP+sbBcQw
a9ldpCKB5k5AjmGgQ7YTkwlT4PZh5pZGPOID/WggPBhHGAZcA0gQ8c/oKqidxaHV
7de2urG4MdATbpndFdHKVia8PgIiEty8k99iaFbNsugD43v6/W3PrNGEfvIi4wnz
0IGYH4VpcrE7SfWj/dOqsi6OA2ipsKiz8PwJkRrIbHCNOfCB4J8C3T5JemeY9GSh
TvvHilCkAF4U7w7caPlWYOrnsRDGCCdvWl2IDetgMDYUFks0v/lQBNiIzRCDSlM7
dKTWwXv2zKBdOpIuFcICkkK26WuN7TcEGsQjDFaHQ4Re/B5RDVT6wjCI4w+qqEQu
b2CBgbFSp6aAFKSpWAbi8HqOCPbR2dncw9MyFvZeRkRzyWBKKaAQ0eunjet3b62Z
RwAZ/3pSrrjvK9LOOZrhc7n9zADcfkzetm97vHVgeWpxczq5/gcbe1bSLTTxcK6a
XIRhueA/jiXhcAiPl/vZeL7If/DEtxRp1ZqaENJ7Zw41vjWOF51St9G7LX6LZm3i
5C9az1ZtnhfptNfF5ba4jR5Unztbb65oTOOmsrZOd8i5b41rVvW4L/o7uXdn96Oe
OO+Gpe2WdCKLnRpoLTs/Kp5CLoudN0qAbXKXLAMYViuefJ/jf8v5D9OMwVqnr11C
UQ3CVy0bN2j+CvEnY12lAYCHkmoMGDZlGYPK9NaxguPbNxmAngDNB1qVCoGzCq9B
Sd+PXgVnynJO3rMYGftTmdZUmrmMyNzP8gDBlcHRamw3cR3zn5tFfWV9U/qF6b8Q
ow0fojZ7YG16Nia/MkNCiT1BI/G04n0jr8YyTkbzU5rFPYhz3E8lEZQ+kvAOkLua
Q3oeYpYjAGV/EtA5JxyC7NKModcgJvXh2hk5dnOFzf9hOJdNlJMVQIZX7BzPyDpi
mnowAkI5QHz19m0f3Q+k1Pt+W8Zn5WWTYm1Jme5ue8fkdNhd6Y8KVd9ZW59So03f
/c1t5f5nvjGCs/bhdFFqyLl2bl6jvLAor78cMQbdN20rUwX+HPtLWUCpBR1RsMjO
sKEZHetgwi0bo+ujm4P8GrgnOCe4V3nFMkyxitg5MTuMP+8T3ocsLj1OPW6Zv1gX
jBcol6hIOtWl1DSPxecTzos8UePoqc9w9TBuhhJj5/ECwLwcPitfc9CDxGbNDyUW
crYcPkpP8gDeeCB9ZUACYSdUNJU3oRzU3ZVx/V9nviA8gav6A8t6fX+FjBoCgBER
P4NsMPf4QHIE6Ja2cZahfgZbsYxCWbcSm4DFOsDbP6IkeflLyPO/2IyEj98j814P
HTaDbzMZYlVHsOqUapkmIDhQpH/pEBdizL0LwPQp+sB5PT5v+fN3sH8cRhOeInRr
qtRbbHttXKj5jpW8Vxufdrnhvw5NsQpWWnc9P+V7/az4uZq5eLVnRmG4EON8U1zT
RK8L9YrhlI87NKhGChuUpHnqFpQz2AnsFK2Fp+ZGV8mdK24XFIL2oSZJdovncAZ1
Jq1deuxsy4lfYj+Jf8X73YhGt0aJxI0z0tnpyJeLy8K2xIepgrgUv6e+4rqaLV3X
DMrt2eNmoNnhG0Ch4DPKLRdkZEvRknCQlTGQFyNQA2YbgoCNbZCQx9Pg+mydPnXe
dArJOtmR+xxoZ8A3m5M7KjVSmsLjf2+2OU+XELc4/hlsYx7lchYDsfX3lhAvHQ0S
BEywwgcqhOl1sseYjDhcfhZLiL25NCQAOHMfz9o42iE9B4F41XsicSHo+Oysan0b
Z3mbVnAynZ4TsMlqby/cPddbZvmbmj20Pf8+TGzMF62a3PgR+ZzETn445ybk8tTf
1vR2tfzWZaftgCl54zqdEdhZ+lDrqKRY6NSmgh8cKjEflTTOnDFgwIpVTRo2I40L
TBvdRYxrNAIyyoEyors0AImrDc8t/f4RRDdH5TeHM0z5s22uMYWGcwu0TqpjQII9
TdjF9CfY6YzTL1LAvr5GK7x6RFnaIBradlgYOCRSdIldfdN2iInNQkcIcSQet7w6
J+D7LHYT75a98yaS+hMWY+5Vyk1Ejufv2wHfLAp8jZXWwjsdfgjXm+RfQ5QOSb5r
sPY+3blR9woHhf3gwHPQyRg3TDta741n7/eqxOUz6A+f7dCU3lNlofCdP5akrO/k
mGSY5BlkGeSaZJqnGCcYp+kn6acaJxqbSDbDLwcihg6GFrMDEaVgj81DzYkl9yUa
b78p54aTvKSvKbub15KLTankkXlD6Dl+eXcDDXnLHlAzgBq+MysoucAi2LHVhbDg
Ithw4Ww4Y4deZTkJmRGhB0RRknAjSHjrW6z0Y7rGoAGOfG/zAroGfwwcDaz2DATM
4EWAoYHFgRxZ6vn6gOoMbHn6oPcB5/I/GTF+sEyoeuBHIFQbgLFlbDo3taelZVs4
KymvuSjt9PAmob2e4nu3GOGPM25pDwsTgTOjmqQ5t5ZxhjMdDQWc3quo349RByJR
M1FOn+vNh/EuAVYA+r+Nvyr978rBg9EJAMp8q3rqYdJuIFZxqIr8+dCTYQmw3QgB
+OAAepC8sCcCDxTf7yRZVF1VGjsmUqXUxrsxQ0R4mFtRuVNxTa4ijgBuAcAbvQKN
Q1wFL1zneb1k0nV0dMXQ31vB34CdRtT7EYXagUbrU3OcNPtuJjQNvAdroCo6/4jY
ChJk6HgLPpHyAyvDxFzI0YTGKZxZGrVjV7Ls1oX79XngdcCQylDfIEUM4shxqJRd
KJHqBrCiEY0g+YRT6caLbnFMtQ4LFwNk0cOWlCLQUrJlOktyihRa4qWdeR9627Ah
IxqZjKdQq0NJJhRx2baz5O5CR9iR701aLjNANBXyY5eOpc3fHzYID9BVW7Xs+g4+
WHmhfF88g4u93Oq6vq5h62ecSWhmmtHnHT6rBdtue+0Gr9ftut/5eCq63ySeB9FF
fkZR0WtyGp25kM4fDbNPPcVlsJSq82SfMqGqPevzWRyUTurvOWulv8emUMIb/E7v
uiIi2zPklof6APQi+aNZW4R0bouQHqg2DA6DEBJmXFsCDsRXzxBBT5/BBsUEZT1F
ISR1AQIex89nPVP6hP0g9Gj1y9rVAgHtGQkC7EaUEC3ZT+svfREwwLLyQ14B2CdK
Y4b79bfbZy/rP3Wu41RDv26xHQotImzpeRcCMnKMyjkEZYEf25Pdllcq7U6B7aO8
c1jJP+39IInTN5QpVssws7prXqs+Tth1u3zG4tb+kTxqkLXsPY9rqrgs99X7mHHJ
6cXSi60pqifpn4x9oJdeSOiUQDA2Do4ZM6Kjhw/kqlDl3F6WRKdlaetCu3jI3Ldx
NEiXSGkduz2MtFIwH+YrgP/MzrYYxAYEDovzl6+3259CyKyfnbYAGeX/w2qYx2Bj
750J7nM2YubdPCjuQ1yfUib8aE/K4c40hgbKDq7cL6MApxU5dAXZ39/LhcCMx4TH
OlE+lVmEMwYFB/JX2B3bMDbSRqasSZpMrAAUuyEHroUYqJeBj5BO7kveBR0pOM5L
10bNEYIIaqJy2rL1IcU5R5BR4DiFltCIleNOEeNmkEobEhHGaOzdM4qR887vLXi3
njyspOPYr/0hIqGyffpKg8HzSddnE8+20/1nDG/6Knfm2s0Vn8vz6oO1GiyUjzSd
6JzDdFSkd6Km8A0FmBHTWcWMKHI+X6EUxfFJmSoR35B/GjAfLM1VBxGie0m4oLhP
0fjga/uinHEgv4LtDqYBVd9GHDKURqr5Lcs0+kg9CekPB1ct5j4zgd4/pnpbZaEl
cyh+nbakeCidYTkerzRqXGER5IrCnGEJ22wO0/qv4d97LUfY7lBds7YV9xgLVt1p
NcnWy1WMFSx8wlfsW7ZuATz2biG9BTvmbklfOy6ZH6OPTG9LLmG5jIl7LjL++0wp
iYGlSZZE87XEfM7uZSiFEi508IBbFoSfCxAfrpL1d5bMt1HW/FcjGvcchey38nCt
Ugo0ZgyDYXHJaNiFgKMAkoo9Q0Rv72Y9MhBhFExZ26J5kFHKIKOBIhyUJEiqKAjN
uXNZsWBVCtS1EgWDORZYPpLQ2elgV3P7TAbQeNNoxhi09N4P5jJda+Uz6ytrmA95
nMN+FYKVzEdE6FisHsP90/hgMAqCdlWtfm7R0OmUUyEIBG4Bv6Tc101jUQ2PX091
z4Dssy6XkwGHybXManSJsLHxNH9cOU76KNzOuwr46jCImyRdLHTO0EvdBkP8RNR5
Qe/LHuIRp+y+D7Y1DDmBZsexggjjJOHCNZbaUfNNRiw1aAw0ItoGXSz9Duc+M4Iv
Ak2xU/8lTnsBn1v/D7pfBMjfSansbI29IQQg0A6LDB1LozSuWvutkJxVhAihmpOs
wZC5WSD7guyl6PkvS9bocNn4J8nrEnPDluomDN2OeMY9lTtJo5x187+Y2VQOkrY+
awhMp/1qVAtpmIls3lKSu6Nzq2wSWJWLT4Owg1PA18K4aVx19XEOM8OxWxkzl86r
l2lYrueum25cvzXcxjSM3FISES1rakb0rmptXkl6M1YwVTCv0q+auQXaa2jMqfDj
ctu2m/hHr8632HGTo9f6HPLnvkyh00R8i0SOqkdsCZuiN1MFNmN/miblDhjOYEU9
vRJisGHYuv+UpBJV+3SVPR/oTEBdUR8C9HxfuJ7LmIoPJDtHJ42mk3GecKZyr3Dd
zZNjto2VEXMz8sO7sA2VEXlA/b7NVY2+wb+lfaMvbCVCfM9TiyWN++/hJ0WGL79M
MYh8cRQ06RROM6zbNKzieArL3NpzJUXu1FB4Yp+0j1k6aTcwQtgGF4/vjRzz4FGI
U67dlrhNgHUOGjVF3nD2j8KCdePN83GRE+nYDB3x1WhZJKXQD0qtuH5Em0bGsMyH
lKKSmVqaHbIS93Q0zDUAbe6/JWiqmifdSUgR1Jq5zi3WLiJEQsxBwfAvr53dWutE
+2WPYX3/8qJRiLvMPQt6/YYpEPASBbgf9AvwwEqLjq60ahqnYmwG1fihjKdyLol1
rBtD8PJQvQhG+QgPKi0bI8L9GcPZKD3dLLpPefQOBlGNICAUPjlj86HRvhSh3fVs
jto1J1cR3MLeulCo6sHuNaY+n34jE+Y5/5oe3n5z4XPIIXZy7qQkG317FRLJVqSr
ftnOmcFSigUB2j05SPhch8+H5qfiY4TVRbz8DCwI1yBJkwchkRxGwk319XhtcnFc
bupke24zP11x3pycTf1BhTkpMI79thY8/bbDNWCewTGddMvmheD8E4bzQc4RI8U/
NU4Yl5PpwsRsBDkKFd0MHbOll4AiQelaFazXyF2Be98TbvajgY1anmG+S2HHYtAZ
3S18PudyttuIfZ3ZSkbRHo1npXAt+JmuvtA5FQp1euwY1NOvY9cZt2PXsfuFZNX6
1d+1+/LXU+Mj6l5+BX5pVmbGacjk756fSv1njQLNXfbhWzkMQScc/gvp21harFel
JaeU//wDUfH03L4yBlhRwoXz2hmZ4LEwSuuy1LVrlWWoUn+16XhhpvMatLWSPnkd
doaWSPQbXLKi0cpqg4jmn4QttKg/TANJ0c/U1Aq56WJcFY9Il7KpQEk+kTPuSaGz
RsF6C85FzrRGxlsC02hJtkagxIypaRyp0MIt9ypqGgJq5Xn7VoxG+DCrtU2IawdF
KpyG/fxyw/zZCsatdWwQNNMnnzCfHBcrWJaE0m9ljBvWP11YHCT8K1Mebxch8Lsj
dxGHK19YIK3EegvKwtAPVtEQ/WgHJ79WlxtCh+UDd9lN29NbZq6mrk1pFWSbxdwm
UdgymS6HJUkGCyz52uNIHSvlBYFDpeFY1BaB6Ob4lp9GeTA9EFRnyvmSmRsokR4L
4J8qFBCU4bRipAfCIkLrmr1+jQ30cFMzGTndU1+Ps34/TjOvPmE6ZFe5QT4jVuX2
HQlpr6lSFNdRRxn9M6CP/H736V71Tvdyd5CdbT/K+nfYrxr1PsVW+Z+C+St2DQla
DLGXlqNtm3l3CTCfZefEXiaj/u6NWWzV6UhNPtBFCj0bK08pzg3xmrPFviLgPDZj
DmyDoVKu833VmM6IZduNp9GY0EzBWd5b8Wx1VaPF6PEoNcWpjQ9SetNW3ZZ1rhJ5
cdS5x+uD45mqTVYRklYLuTJTQzPmzPdNM+tDHteHb6SXiT797yo/Wu2GtSN13L2T
vVx+Vi5OmxZtcVeeKgtqW1d4h5qHOKHTC785vu6+beCd9hNIc0kAPFpjOAuxNm5a
jUG44adDy3KiYswaYM1KqikYur17mXT0Hey6sRnscPTY9SG3Ooeq+pzW72h+wx0W
DpdY2G2W9dkM6aIG1Tcak3bKnUuRWJylbCpwhUd9RogSKF8jSn9t4AIQR6qQhZHk
REDGk9td6GH3W1rZmCmdmGkCmCJCgd9RPZIlnMcp4hNIhEToQuLBfwWXFhFtlMLZ
qgKhPDxKGgT7q87VdqHkDm+WlTRnUib8L21oyAFOdgFvBr3yleHBSLdGZ5R/lcKZ
rAoJEgYIwgSQj4FPx4PkYVtHXsVT9p42PAlfzffTSgwqe4usbKvJ3b+xFy/Hcple
bu4vHm99WdxC8zzvvgcEbJK1KBTkordC9c+t+1cJWh6Cxmhf2pY3gjA8J9MUDGYJ
rIZ3MvkDBwBvJEWR23jeKbAPhA8UK4x6hiq7qHoocJnL1iR9kbbpmqy1slPoGh8P
QC2ybBAt3Pm5CdCKG99S3MNa5hYbjcg8OQaoE+M3f/hYij3ySJwUU7kxxQvHMBFN
30Wa/aWTyVkAW95T6UNaPATTOE+MNIVMMGJqHpCB+no5MGIHmo+aZwmRiz4/qj7C
PvQ9WUQEXOdenywEffMYIXRV8lfBWW0IRe2gLQazbcvqBYuYSFQCAFO5UG8Ex+Js
6RRTGE988WWHPgmPijMsM7nOpxTAQun0PA8QSVL7kQBE3Fc9idaRvKyo/4gymbwJ
UmAxHjgrwLq9RgqKmduyqTWaSMqY5pUeXUlR4wJmc2mewK3IPBganPMF37MGRjel
7ty8BI/2ep+6K0R0qf3eTGewr+GnERtdPXg9p5mVzJaH8etgeRjh/8wqDXglKDQ9
FhiRN9C6OXMpC6ibBVuXQ+ZZVdqiZW1kFldrIuUifDCM9uczkOAghhY88AdiglIB
+HT7r8OLFbRygh3fHgrByjwiz03gjfYK3kNR0zLWbwTPXzwGCX+H/LSSk5fmVv1A
b/kB3P03WMv/CJBhYmBmZ/2/uZb/OQXx/5hrqSSpKC0v/D/iSITsrP/8N3BL5n8B
G/8/wi3/l3CW/wq3/P+h/5eZ/jus5b/rP3CY/wJZ/pv/dyAl+784iv+uf535j5GZ
g/PfrvoXmvI/oyf/rSn/td3/PXryv+/yf+FPQmnTsjFxENAys7P9B3+SkfF/y3z5
P+NP/ufIF0aW/wmg/H/KfGFk+l9CX9g5/yeBEup/J1Ay/3tU0X9qxX+Tv8n8P/I3
/4NA+c8N2P8PCJQtnpDuKqIrLxUdra3Frc5c3SbnN84dyAsRkJqQIo7IiRRiJNWl
8zCQCCEOhBL2hjgCKMP5SK82puHYXIWOizHpENGK/GbZw4AuaM9ZmI+zexxcJwkZ
8vOKZz87HbgKp4/vv6e/eae9OcplqY9qOVyqLraq2zA6DQVxU80hJEpqeiub8hvI
FEBeFscpwAHOXJ3RY/VXhT9R9NJlPpsRzmk63ues6CWLghljWo0ddW6qXLLkfZdq
xMQ5pqx7olX02G1cOS9+QHoe5xspyscBvYTXndWvFxUv5/AS4HS33dX0tPoNWF3F
ftcfARUsTwUjP9QfpUea6Ior2OeNdSEwDszfSVgW5OcRSTlU5pAJP9A/SOfxaMdc
PU6X0gHCkzYxeVjdYrBfd/pYj6JHJu2/sfQ9HA4LciM4Y5ksHooA2YauDzyZxmX0
PW9GRbqTiKBl+I9jB7TTaOeUG9BCgxDA+YYIMLS8KQwalcmK9mHKhw7qzZY0rHS8
qHmaNcdpu6otx/nNYanKrI2vQ2nhV7yQJarht5Iqs1KPkedYcdiLw2BmKb3r4Bqg
4Uk2VGz43uTm6Geg8XhQ1wVugpTxJLyEvDh2r0UHowoJNeuUvKF0VBDwQUoEkBv8
oT08Yvjyx2NzFwnB4zSZfiLCx1JxACbC5uA2gNeguGDn5rQDuvkoEkJXhsm8Mjqe
Gp4Utq+bWczF+POmCGl4BNjGR+LXr6RXmTY38muNVcmmnc7sLoEcFQs8WOAOKl7c
Bq3IYe7iXd4dpgOxIqEtE3DvuAqe4CjrAWRhiEy0NQRkR24kjbpC75eHf2lgX7vd
TWS5Euu9KrkMQ6oiJH0WjlGIepshuwC8Sd353qAsUDVZeFOCp/VaQK9ZBbskJwos
KGxTdVRAd6jeKdSRNxFaSzfXEegpa4TiTiXwZIfINMvBCsXGEeoewOEkIk2/riGV
S+fsvLZylV0kNsgwxyAraOMdP23CimGiHUJXkoYhk0osy9dpaMXY0QdpfM/GDEwQ
qRaOHVSWsklbJD2OhNZJlfiO/VulQbH8dDzDNxJ+DIkST/H5CbYrCm4QUgrf188r
WLkNG9Ri2LOK1ylUSzYZAFotYuBJiZgryzmJUhRIwwdHshA3o9N1sUSsEYrYwhOw
hiRghSoEp/gSbcXGp+Mr4tmUep1RYQNcCelKVeVwwFCjCMn1VJRYyTxI4WGM+QGU
mY4+kMiq5qaQ3f5YGeUGr2stO0toyT8K4ujiSbTxqlrBS5RoqU8g5eoAnsUZd+Al
bp0XCMrSMZKEFfNgCGGQ6VOFn74tm/IvGBF9Rtzr3xEPSHzJ/mgzbn0xLAT+Okb2
sg375ZxUOPiSdFO8YQfKs5zevyqsO/6Ib4RgnIK/TapEQO3sFxk9vW96R2f27Qp5
or5huLO+Pd7vVf0o8mUCBN3Aj9DSzWv+OPJoMaLeh5UR3WxVhA+qLuOc0N+jU8Kr
fuF1QXyJ8smF7NH7e/WNvgN0Q/3Q1JVo7n2WvvndBRlFPp6++WYC5oZrh0BZbhGs
7bTp1ZsdJMu5qL3BP5i94T0IPp27D4UNkCMlEPVeA1wYfzHyIcy+cmcyvwlXR/kA
FRh6Sts73oUdPhcmFrz1+/tFw98TDivXBac4mrSqYNbS1G3Rgg4EPAj4GLjlr8/Y
BQGvDzf4vsMFP6PspfMSgLIM2cVOPls+Sj5JPkUtogUPalWDG/aiEQe70pJJxVk0
kPXEnARxXKyBbMBsAHXE/gnGFtwF1oX+6Ell9l8Dm1O9I/sWeAKehxfpDT0DL8QP
9yX4YA02b//HwM4Di8Aj8Ao8mYfjEXj6nwEWigtD+Hj5n80j5Ag4A81DipSFnoEU
IofLEXCxipD/q2gJAfpvEhWmEPg3YQkB/qN5hBQBFSBFSJGS0HKQQqRwKQIqVhHS
fxUtwwEQAAmABEBYRAD+3WIRAfxj/UPrgQ3BB+CCdYXXAv7N1hJeCfxjrcIhCcj8
0wGMhIRlABgBh0AQkLGMgP5VfFMlXkg4UQfgBBpDFIg1jyf2xwE8giAQZ/nXIYDj
n8rLAQSjgWhgbrgrjvpDLFecNQeD0QDc1frDeBxwV53BSoHyfwlLCPTftIxA9Y8q
QzHAjDDCDQlCWYcYEAYFYIAZqwlDA/4pagjDADKCDCEgCGMZQYQTEoT6YywgCAv8
Uywm/KkLC9Uf7Yh2X32gtc4cYV8Ux9oVsbP4+mQpvLeyaB3pFddm7Um4YPVFFWWJ
LVh5A3iPobmpa2Xt3AM6CUoNWgl0DXgJ1APAbF4zHNoBLXGvUaLYhHmE7YTxgqXH
cPaCRQazXZxdvV24Xe7NX71elj/zyOdM02bhh1oV4g4wbsbcHyXoEkFg++fh6wW5
Wu2ZWd1X7bNKrfzZO1RybUvuVph4SW3MKaleH5o1ajw5B1KZNQRYKUknbvq2C7gg
Hm7az7Dd/E3YxI9behdf72fJKhVJ+IJgAdqA3YCqBFcNmBA0jMdXwacErZamzK58
IHBnpICA8r8YPx7gm08wURlpC7mW6zIiTDIvawNpA74/kKqfd7/3rj89GKb+mib7
mxc5XBvOGyXaAu5tt+WHMixftq7s8AtYnBv+adXXcThs5q+LQO87vWttKD1G/3+x
dxWAURxffzaBEDQECU4XD5LjLhdFE9wJ7hK5QCBGBAgUCLRIcXd3ioUCwaXFCxQN
Wqw4pUDR4t/8dnfuNmccMfjz3Q8mOzfzZvbN7Mx7b2w3+72/yu+2t1Wczn7zw7Lc
nXK/am475uCYUrW258s5vEWVnFUfLLk+qve9xTGNF20d4rSUEtmVCFsaoHrSpPnt
2QOq7K/bsZHPogmH2s84NrXJx6Ufm32sf/LVY2Wl5YcuD21R6GFk/6kubVzfZTk6
JNON4CE7vWsfvvle6Xqgza8LXjzOde3hkNyxG54M/vj+g/rdlmkTCk8aVPH57g69
Sz66Vrjg7YFTQz86DVk2ZOG7lUN2fSw6ZP2QRXuqjn239WOtj76Lyh5oX+DaxmvX
fsp2d3GBG1s/rlHGDB39z4fe70bvuXAtt5fzw8bqOmdmHrmdZXjmlRWuDCj0sFPh
en/3+Tj5TYvpy6YWHl9oRI4CBTvm2JijRO1Fi/ZOjIgsXKzejlO93Iqox9ZbctW5
yLZJY/84dfbHPPnvZlrRtariXp+AgNK9+1Qt0CeT/U/qUiuiGxyfXqX/ocVO5xaN
X790fH7uxX+LTzofbZ/QJGl4x5kP7i0cf8Dlwdieh1aW2Oy3dkLflSP+yL69XsEd
LiM6T4v4TrNpa++py+qcS+ycpMoyfNM/5/5UBRzb8c+59mOrras4p1rT8Rc75Pxn
7bU8z3vOqr721PriJ84vef2gerEx28+WexbYa9qopU8Diz2IHWNToO+4PkW2bNo8
vs/q7hvWqbYtuHzJafT32/a4221YMrtg8Mb8Aa0rFdw/1iVf7oAn5Vxq5QicOn0M
ybVtYfeJRxP86kwZE9TezXtW1m2TttiErS3FZZqYNe+uZUd25l++/kj3g+RylTy+
ZJVffGzW8ufyZ+s5uumZCk/flmg5npTM8bb62pI1zxRuVXF3nqzNfzo732lV0qXJ
p9/0TBpFkrwaNzvi1Zh/Nq3Ex2sBg1xaTJ+52//M0bBBixLn+3X6bmX9K31u95qw
XVOXV/4S8oOz/cqWS3sc+D1p2KuXq4rUGrT2wXK/3t2Dto94u+WvGXX/fe73t/2u
PxO39r6lWbbevUaXWVedHoSNKzO78I7Ze06dO77i8oNe76YnFq6r6bJ4bdmcryLC
3Mf8VfZU2409V3fYlLTULSRs81rHZ7s39t7fwGWDd8F2v+atpraN3lrOs2DvPhff
9hiTtbpHxXsXp77d2eRh1t/HHmwdvbLu5vg6LeKi4zY6/1Ylb922QZeXj642Jzhz
9IIezZvkvzhpXv5ei1rZ+tpcW3ROcc/vhzHTY39atbiC8tct4y4O+LfngeK9Op0Z
XXNpFrfC7WtG/lzv14YNPpzocf3y/JxFPNZ855NQYvv8lbVdupxddM4lvqyd7ewH
IeNKPB7bKm7y0tvjZjYJW7KqT756izIVyX38p/ZT6/r7lvnhedD1fW/8bQusGDX0
x8p7ev1T4mERjx8ii95pd6DPNH70ukb5RvTpOKxB3bDZN7dWON2nW0I2l9IPuPzV
5t5p1Na7ZO0bi54uenPjSeTryF3Fl73tV+rMnk47G93Mv6NM4VHrampy1MkSoPQ4
m+ef6vlOHD1fuLjTpJ5uTl1OuA2cN/nj6N6vGwzWtH/eYuC53knZB/Z2que8WLnd
+UD/pZ2u8S3/aljfrdLDNUMnZl8V0+honl/bObTcWmHA/KduA+Y+vWX/R/upVQaM
nty7Zf26s66/q90/6k8+6+wBfz3P937+tARS5kKBW8tPzJrRdMW2mfMW3Ki2YUaz
01e8rlZePnDmD6MjC3epFT0rxyznK78Vb9Jl1pv4P5ZWvXfjbHRo7wcNpz5euuD0
3ZPXm/cPPHcmbmK3WoOeD31e/EBLh4mTwhc3mV03+6wxA+73+29QtuqPlu64V+7h
pbN3eyY17NSiWyn3VtEPDpzNWmFZp1slrnRa3uN+3yp7n6+atsr9Qon8p/kJywfP
GDCjZL4l9e+Vv5dPc/PpxXxLG/cscuXQztPNHXfMKb6stPpZeMj4R5k3uc2Yfvo2
tcFOT3me/U73edu3xBxqea3xrgkdZjYtczIk56C9vS5W+zAztNnxZrtqFzhZcNfo
D6Ovbf1+6Lutj4YFtXowctWMyDeDx2sSfnhYt8u0R4lTzi8r3qj6D1V32TcdWfeP
2lUr3hswYNLgZh8XDnl6fNXxGA+XWkfXJ3zv1N2x/bt+fx71/Lfp6TkxdgMu5wzz
PKloWb7ZiTNclUyX35VrenLgsSNRF71DM++Y937KnNcVBrcf4Hep3Pt6wU8n+D/O
Pdx/CTdg7Msz6++5VzkWs3LP5NhfHv+y+WHXl7U9fm3zwfFjE4/fzx/t9nu52Em3
6jw9ejZuVfM+d16e2rZpkse+xAl+w16eWn9/y9Zp7ypX+eNhqF2n48UDKszp/l2f
vJVvPYuruSfLirsrlj1benlZgdsdt9XdXWdw08H1+y0JH7no/MRqG6rG9Xh6/9bf
q+62XB/4qH2LIZkKePW+V+XY6EP3Mg/Iu3lP0yFLa455/cObHhs0D6v21FS//Mej
gOYb2134+2Ht53mq5nqX7XWlq6Pbnn9asfuKte+aDS7QsWal8CqRDf+t/6Hfh1VL
p2RbViVk3vOJSxstOe14f/0vXcYf7nH4zO3XT129h09adXresk5LB9baUv/V5Ecz
d7fY0+ja+o9z/FffsLu5vtn0+e9aTZ68ekov16Hbeu9vcsm+8btRkVntOxVd2G3v
4j0jDuZ9nrXer4eGrSk4wDOh77lf72x4dnH4mglhGs8NVS8Meuj7UjnQrrrPd1u5
7fXj1N32D4z7bs/Qa/sjDnQ5WONDtY/eH4spWpddtK1TtoYtQra7tetYtgvfZXyN
HNcrPLZr/7Lv/Yb3E54vf777uWdIniV3pme/lfNpvdeDX/eJW/Bu+6POVzT/VV8z
0Ndz3cAu/Wr1q3XiRY1B83fX+tjlfd43NYs8H1Gl9oobwfsicnzUPOwRtybf7CzK
V81r/jnGvf3eBbeaxann1Olbo1kxj+fVRvdp/2Obf7udLV1GpWjbIteVqK3t/nCK
3FVy9QX7XAm2rY92XXR8gMI/0Lm539z3Q5sfrvxMfX/LmpFxtw8tOxq757rvJdsI
t/0OT23XDH/5b73dUz/6lHxZ/Orox/67uzXtt6HxhQGX9pW92OTloLYnPM5EbG3c
cX/4woNn93UOLusxo1ipnj7nj6y+V3XFjidrHc/FX37tMLnmZJenm580XxLjUO95
+QEz3s/c3X372fpPwvPsbFF55zGXmY8vN+i/K3zNxuPtJ3TtP7Hxi5Eh3525mWtX
15qdrjY4dK/b86GP4o6tdOp/5tWU3re+OzKkYdKK3zf8lvD7vaxrdiTFOLU9NnBm
mZETnVZl33Bafb1x5OsG8zblmNHj2sjzO6ovWz544vYasU17ubzPc6Fy+0Jvh+UM
rDvW5tSogevbbWh0NbhqQq4Tb849ev+desrqnnNrBBV3Cm7T3mHK9oqxtbeXi30b
U/PUruULcvW+5uMQUO9joY3ettXbN1x/ZuTzQuqA0J2t67mf7GcX83hx47gmVepE
z5zwZkNw4+uHOi0f8EvxzaHDXwyOf/G9fe+bBd/tH/48758L+typN6Ht4kGlHtyP
nzfjzIBL4xx3zi8zcWO2rjumfhg/uNPFHJ0dpk4aNvvR0POFRzYbsnDPb5fKN13v
+t/wton5YgfVu3umwia/+vNCM5VKWFD4eodOy7r9erXusWYuayZWz9bZoe3K/DOu
5dy+R9lMc+RZS/V/he/nvqoqf8vh5j/TGvf4JfbkbyMGz11a1GNBrynZF+2b02Ry
m5cjlh94v7Ny7JSYNk9bvinzvmDg4sPtCnf8aeqdA43OPFQX6XE8dGaLbp1adXHf
9ctfY5/+0vP+psl/Ndjq3Lpgjv+yP30WNajrhMvTbh7rG3QxrO0Yb/U+vD72l/2F
pm0efmmgTa+l9aeVWrTxhKLAfb/KrgP2TD+1xG5i0oemhdz5yF3Ob0YstTky5kPT
lg0bV1hRZlb1kw3G3dYMTfTzGbTWPV9BzVGn626Lrl4qPDrz2YYuNZqPcQjpk/2v
X3ky1OPEg3Pxvw+wCev1dtrqLJcHdDx69EKD4INzT87dPfapa+Ejh+u45VUlFXvw
nf+ji03GRPa7fMyxWb3s21e+qbU27GfPTM4/T/otbNfqs39k7hK2dtuv3dfsbKKJ
bjui7crSffe0aPrjnZ7HV77x/tm3d9kEux2dpvXNVO/3g1kiCm0+M3r+yrg2Pds8
Ht7l57Njqlw6u8b5UlibK0UmDNjdaHHUwykRbwaErHO7cKdD3ty//fCDZ+az/2bu
0m3fHbu6OTcUfECmj7w80O7yqecuBVfl6rO05evE9jN+T1zUsKjTbx3Xn37feEHQ
b9Wv5Vy53K9xzxfX+w1Uuu32nebUNe/Yt9//3r7XsO/Dhv56oMuihZemFhn9IvHO
OK+QyBvuWdfneTJ449KdofvnT/N4OCrJI7+q0+7i9384dUbTsUneAhvGD1/hcvTH
8Yu2XZiweug0rufp/LUWBI9aGGGXc93codzevIE+q1YrS/ZufWbufN+3TSZNULi2
KZA40uaHBXmCfXo+XRJx53mz2/f2vWzeMN/ouKgBP69a86p153H1kk63VNXNEa1c
frJP4vR1LpV3RE09P/zNP1uLrNrnO7GK/+WrF45lm1mzYD7bnYGtF+VvsLKTU8yy
M1zHSUXKLbO5W+ZqqUbK+PuT55ZZHHR01eQzT+bnDn5ao0+Er/fPqqg3J4L7abas
nb/K9fzH5Vsrd7m6wfns0DNNF4Yl9Oh1rm+lD/UqdFHkyLZjUWiF5cEn7k+O8n5a
Z+zdRh3Ll709/GizMfwpTdvbyg/Pa4WsyZV1Ssuj3Yf2Tboa3bfKWE2mH1o1vjMk
oF7Og+uH1mt1KFOjwG6/Lh+w6I+xze7POtdx3otxzz03qR0aFRtzo0//Q39pfvih
0DXn3iMrFyka6pD5UpaBdgPrt+rU9keblyevFxwyt2aNC9fsKk8tfvLU2WdVo5Je
dgq493svj7xnprc62mBUWDfl4oR/vHaPvzG6fMKgPu3mqmusWFHGqeKhskW3NM3p
deLd2EdTz5/p/LrypoI7C8X1Kzm4as8sNfJc/XFnow+lH+2xJ6r9f/XeXnygx9lR
ns2r1D/64WPRUas3RAws7dKq7JXWJV7mazWB6/z9MU//CRO9p7WrH9u/VY3j+y44
dq34vnbXih8rv89pV67Rv0/j3eu451m3otPLPtPPFqkXN2Vy0yre5VuM8G3m+rTw
i+2lZ+T6xX5Wgv+rieV61bza/5d/q70tN+5ZM4+Wef96mdd+eTu7jcM6+GfaemNJ
Xi7k3Y+Ll1Quz0/I3vjqrAHd2v24cfEMu2mF7Jb8GpSwY5ziTIeDG5uMeNa08T+v
Ljw+vr3yXd/zN1/e7bznRFzzIZ0XhKjmqIJGRCYemVsooWii69/O1xblq7Bt3rbq
21oOeTS9c/HDa48V+6PYiWnRhRz89na6X+xVo66jynx/xrP/Yr9fOvX0PnF116PR
NztOnV12TuEi//jNiF1/NFew9xVFu9g2Xbq4TN3SKW6lMk/58WevHmnkurFf1x0h
YyZMa9311Tl1xM5dR2atH/hhfzeH4+37Xjzwqlqpus1LT1mwJ7r5mle/lpkzft90
N88XnnNzBt881vrAufKrc9YInK+4drtquVcPd2678XHTnjman58lDjwxofOtXV5R
gbdyPZ63+8ruDX8ueN31uPvfL6YXnXH17wrnmh/9KW79X55Pr7zp8aJm0pxuK+Mu
//FszM/Le0zrMHrqvULudRv5Z7WJGHz80uK8dXeurP7dllyNliW1jQ6useT7gbtn
f1z/vXfNPWPbTBnWuchy1YoyvmUqry6/8tYlx/7fu/v+2btaxSLHpo917bNsqOu4
Je1vTnT+4cfFXursy+uPPdOkzPSZ13YePfY+eLqremNAbNLMQc96t2/qcPBFYqOD
7V9suh7lOfD88Ts7Zuw4v73Mli0DmkZfevf3upmer49sP/Lo2cMrh5YUzLx0/OgQ
9U+9Ryw/uHxK9wUx9SdUKVxh+/m69Z9/n8sprG6NTgXmNCl3cKWz+4fO4YOP/7W4
Td2dVQv/bVfy6Cm+wz/jxgXkOx/b6lWVtp3btetyO+p2g2Yzqo5yrHTub9XUze6x
sS9iL3SoW2v4gOXnizz3bjbW45cHvTp0q/Dm4I0flhRrGe712n/5FX7e+56vloyc
XqP/oYp3+677p/2x3a1e+bcY1O7vbWFJL5t8uKsuvrVi32fRR051Spw3p91j98Qt
h7ZU3rG5VOWihzud9Kj4esSS31v96dU7pM3S3SsdynYbe/HkmIvh+8IOTGz5aNT9
wEKqQy3Pt2xe6XGNfe+Xn2i6/MMwl8zfL28dOH9Wq5vV6/dyXzDlzINd14KiRncq
12V58xxD3c903/zr4UKPQto2/nHcLyGjj9fbPS/zmr3F3QY821HYvdSJOdVO7H7U
/+bOI1PGDTkwbH/ELyFRA8rE7vOK3p7vaOH3s8e6jx/TuUDcuVv3d2xwWJ3/3KJK
O5Zs/33ci9Hu8WUmJk7+c867X+KCLkYfqTyl8oEtro8b1q/798Gr/3h23vlg+Xed
c+8rkTSqaeIrRXjNUx9vbZtR8+W9aId/ag2Zc+pawLHB5W5vqH/w8Pw3nUNOhG69
9jz+dvG3ebcfUueamat9vUH1lkyZd/zE6S09jlXu/9sv3fZce7VxbLvje472P/pu
2w31mDInps9Y0n1pdL7ebce53B0+d593y/EzFyUOKzuu05Xr79oeCN1Ypcra6m3D
X3jN3Nrv2Z1zCb2yZL34zmfcwewrlsVtqna8elzhdqHtnfYpy39wGX0maqRtcLPD
s3JNUPZrsXzosDUly3l9t/tguxYJO7uH/brOZtteJ7cKTp1y5qjhvnrJb39dObRD
NaucatqBLkvOLJnqNadao6E5uemT66/x7jPNqXeV8or3h7nb/I3cjWo1uDkxb7XB
jZ7nXcP925PUGrrEN6bsI6cmTWe6Bvc+cqf7lL5HClSt0LbWlnM72wydtmZxi9U9
r/68t/2lut3XLHYc83B0z02TNG16d52wfUmTkYVyxy/Z2Co2f0Pf41mC6yc0yTHA
8+OwuAc1Lsx59zbR/djrO6Wj7zWvcPrc1emaA6eTGlcODQ0K9T9g61B94NvvVAUW
H1lQxmHQkEMXH54eN+fusV8PuBwaV2TDCuWrA51u/6xy/bW2u0bjVn55s7zXAlo2
vbm81PIJTavsWXVo00W3sTnmLfW8Pq2U//KKMZnuuvy0/d+o038/t/P+oUjJJiNy
5muVsLLey8JzTreqUeXFU8eN74Neba/XMEu/+JrHS3R2PD7Cs8fCqrM8X9d4lOOl
2jvur6PRtw7PeNz9YcShXbVybEyquyPfhBKX5+06tvWS880l7cdtOHi1V+jmQd3P
3z/w4+ETru1dBkQHl53O93AsUH7o4tm7/htZtPVfz+zXdh5e1732fH+Hx6+KPnsy
ofqxKZMKqTptaHnTaUyHBhdIIY+NgU/mdn019eXf6+I/vGy4o/+438rVm9C70KXL
+ebl/rtfrxd2P3RwD2j9/E3R52Vn2pZrtzf6Vvun7xdnzhmdZfG9ueGH5lxxOPbq
2bAVb4JjruZu/ub2YYeXxzsM2vdqf/uHDbpWuDZm/qUbI4v7/TFz0qC+Hv3ONsg5
fcTD2X+2DVmnCe/b+9GeqKaNXzRu/nbFzRFDbv91dFHX/gu3/sG/m/TX78f2HzlT
zO3NmxsDf1neYW3iqCvrvJceG3xp2PSdr5uGTNgTfjWoVJXgmhW+P12tksPxIu4h
lTv3L31jguJ0t+exQ+pcuXiv0Ha7CXWeXDrwW5lBtyf1VQ56ob5WLLBaXMCa3ne/
j7kYe7luxcSrW5/+9c+9Xnd/vrVgcrkph6ZEbKns/Xqo2/QLz/btv+nw+Ddy5cdx
TXede1Vu6uSBsceCNGNiCtz3uLc0W/0ZsZs3XyvRY2Zo8J5Zj91WHNt5pNq1Y8eX
vKugmf1r/L/Tt9ZY8mOTvq2WrbpWes73c4rtKPr9tsCNgetvjqrd90L530rfmKj2
/jCte8F++a6uWa6aPvK9Y99if+/22Hlox65n4yfXP3Z2ecOxfW2bvW6yc9MT333j
HApv/qtU/XpJYwvGBm49Mz2yyCbfEwH7An682/n0pbxVP65R96CWfqlXXU93fHu/
0PHmZT8OrdH2t8eXTh1q+WGy67oTp0eOPfCoUr97NQ4N+mPgmMcK90Jz/2n2yKt7
oY0fKv3X9V700X9rvXc7mqfxgtuPjg0sNqHA+Fk5j5dYttI9qs+Nnw83HT9nrqdT
125BP0/YdP+y+sSGY1s2Z+mULefwugcmDYgOS0hM8GjdKehkj3u/NPGdsOxC5/bt
C7rmy19B8/fxdlXXH9kWdWnE6X+8PafWmBjd7/7u3waVOOqUeGbQmLsfTn8342fN
gH4nl2Wq7a4o43BtSpeHXQpEtynyw7wb8/yLt6322t1/wYXvncP7j/7DtW2HgxV+
b9/BN+H0Hw+TKq3cFjNnVcObuR07q2ZVcr81rmv1Ck0G24S3uhzSZO1K5zs3yrVv
e6pho4jSUztWDxxwJ2DSb9u7D4xUjdnWboP7o5tbC0RFXyxQ6VaZi07qyv+6HPqn
38CGwSsmvL60MWfTcjv+nXE70nPu4kex/83uPPONZvHSfJ1WuVXeP+NRHd9JDZqX
flfXveOliokd/7OZP+ZwGae27S507b/g9rrfPjq/a7qoRvueiYd/af78Zoedu1Z2
3Hkoz6OnZSOPn+p9/7fIcdcb7XaIqNx5Z8WtA2YMvODUd+yNn8+Mb+2wzimz6+XM
DQ9OjSu98fZT1awxiq35Wv/zc9+KK8+vvf7Pjba9/u79Z0C5+21/O5N7Ydc5l9eH
XQp6lWeBTUTwsw3Nuv1+aEWVPc1CT2y62zPfiPavfrqw/6dN/V9tLbK8a/tTM+/0
Dyk2P/zfWnkuJy6ouLxJ/SlrM/lGur04NbjxDxdDwnOf2rqNc3oTWXqj78C6N/K2
G3sutsfIA73tO20s/PCa8n7CwH3z/1jbeM/0qITGkw64FExUTGp0J7rz7qe/vElQ
9wh/uiq7x65nV6vuKd9w8PTNO3tjH8RvXcfGDnr67+VyHerG3Jg8eedon/Hq1YEv
T7/N4nA1MfDNQ6c9FVtPnNLvlHcxz6v/jhjd5lbz9+OurXtb4o+y68ufscnXfdHY
kMRZ56LXqOb8Oqd28SPTaofXT5yyrdifR6pNPjLRXznwx21ht4r3XR2+Kkto0bdX
W5Q9FD0zclbW3x1XlH9449is5aPHZlucLbFoV5s8jX6qP3prscZRs+fumDtwXssJ
0WOiD8ftjzu2qtSKK4Ui21bRrDjf78WTVcViRnZ0qKnKPjhg7NxV/xbacDDur/3D
N457n3d9pIvX6b03A15F5ns7dE2vIsVvBLZv5nx01cWzLmPL5vLosOjSg0uRTte8
5neY2+778T0ObL4bHnrYrUu/Ys+OTPrp1l9rT+38s1+j1QU2Nd0zp9j8/s9OLf1v
SJt/GuY/8/jMhiHZjzdovPVK2IErTy/+d2cjubZ4+vUiSa9nFy2VpVKl4v/mH+v0
R5eTqiHNNr0e7b5rxvQta3bFJO084PwmYm3bzMsNNwsJGzHg8XJXuWkD8TlZeJzD
/AObt+LbaqKiQyLCeZVSoXJTqPnOzrViQ0KDeJVXHZXSu3N5vkWsf1TMAN6vTr3a
EeExmv4x5bVZ4RuwQlZ1qrgqXVVKN1dvV6W72l3ZUaksR/9rKeW7RPyiIoJiAzVR
2I8i7BOpTXmOoSzU8Y/R8EKeNLBpRJD8t27HSf8oTXA2Ja92z6bUgvdwp3flg3kx
zM3TDft3hJhwKUyp9kJ1JAtTqbw89cMosHsoeZjaS2UY5q320A/z9HJ11w/zVnq4
Gd7XIK3KwwufLE4WpvZSovjJ6VyVKm/9e7hhn49BmLfaIMxV7WUY5mUYJnx0OHmY
p5dSnxca5mFQz940tUGYiv5KHkbrQKXPs0rl7W4Q5qo2TOvqjs8SJw/z8FIapPV0
9dKvU5Wnu5t+GK1ng+er9nJT6pdN7eXhoV9Xbp6unvrlpWHe+nXl5qn2kD23mCj/
kFBNlNAhWoUMoO3cna/cMiIihneVekXD8OAIXtxuVblhHb4TX00VrPT3VAdqVAFK
d39NgL+rv9I/wMM72F/l6u/vqg6uke3TJOI+tugY2qWFjkS7ipdHtjJl6javly0r
aUIIaRMe6R8SpQniY/gYTXQMHxHM144Ii6TcBvHhEQqech4eHayJAknrqEjXinwk
7cuxTfiA0IiIIN5Z0z8yRsG7V+I9ypNspBJHDJDJhpCPFPrh/x+BemB1lIm6KiQ3
/etIPpLMhCNvJYqtpJIUn1WbUoSj5PRRldjTv8g4H3XVhPTZqMtPxBxNwUmKt+e/
p77in5EirVGdFKY52whtEuWAaypdEb+QNBDiRSenYhRyyFMaQw1iRwCO/ntAWNnF
EPEOtkR8ApmpA20W6lDHeCKo2ezU5aAuJ3W5qHOgTnyWhOShLi8RnwXqE3VWgLqC
1BWiDiUtQl1R6opRV5PwRLwj7iw0DzukFflHHMJ8hPxb+wfEhvpH8VGa6NjQmGhZ
Wi3sdWVHfoCPmKtxYhBZTIzfFhOjAi0mRk1bTIxHYjExnp1ZYvyE4+kjw0NG7riK
xKj2utExIWGC2cL7hUbEmLgRGoeRG2XjeWJIjFYkJ87OmyFGc7OYGO3SYmI0YIuJ
0dItJkaXsJgYlWwxMTqZxcTojRYTo9taTIw+ajExE6wWETMpaxExRIvFxJBBFhND
WFlMDKlmMTHEn8XEkJMWE0OgGiGuRxpQAWNnn4l0RyO2wgorvgmgeycTAhIgBFKC
btRs6UZgBOjHGMPjIV/rldUJygJDDFdAMp1AlyKHPM4KOc0S8gWWC7pQELREkMKC
Q+wKMojong9svA80EyhwP76vf2ishncWR57lJZKUg7s0uf6qVttq0vw/fvhIHHFj
QMcCGJSzEMNHwaZjGaQeBWsMzLyjwluJBc4IC1BLchZa8tF9Yv3p6JplkVr81bZC
jpBJmyQWbIywACdnoU5IMB3ga8IDNXyAJqafRhPOh2noqJ/l+NkILbgvrGCrFj4i
C7ZGWGAjK8ZCk4h+mig+MCI8OCRIYCQ0JCwkhuWXAiS0WtciKK7iXpGFTEZYwO3l
LLSJxMRGGrKw4v2VX9ZlC5RqIbMRFtAT5SzUS+vmePKEb6U6Di+ktmBnhAUMjYx2
ynpp1Cl9o0+7ffjpL4mFLFoWVmnnOBDDqBkL7DeTKIBlKZjZB1iWQq47LEth5Qqw
LIWVK8CyFFauAMtSWLkCLEth5QqwLIWVK8CyFFauAMtSWLkCLEth5QqwLEVGc5WT
X0DEWWQMG9jdcS1NxFn8VtQFSr8RjjCgFnUtNYEhkSGa8JhoLDTXCYxxqezCB2pC
Q6P5vtEKPnl0u9Zi1JBcHGeblbO14Upw4g3xl4324QeDGEwxdm74eMejmHYkK2lB
r759NVH+PTR835CYkNCQHhF8dGBEFB3txumWuKXFbefAiLCAkHBNEI+FbXFdmw8O
CfcPrcK3CgmLDMW4MJwYrnSj/qwr3TqgGgxXujnaauyIsZVufQiPWD+QyFe6seyh
W+lma6vI1Rx0K92WpkhrVBdW0TjSTiyQgIXEmYg9EyWTxwD6OXyVK9aZPn/FGjTg
mPMjPPxIC44BH6EcTWhXNLHWihsjARNnPiIbxonx22JiJg4tIv6Cq9Za2IsP2mJi
6zK1FvbWZWoZ7K3L1DLYf7FlarQy5bUOWnorrLDifxvo7BACuKYFgmQ5wWIxtVyt
z0ewgIo+x49RtI730f+tTy/iSU12FXM1XG5O6VUQexRBRKgbKVy33MwGB5+7bI00
5pepIWXhEJt8mRr3YkZ4q9CISI3kTxMsHNXwVtXusTUpkx9xE8NFOTAoZ6GDS0h4
jCYqUBOZmvVIGQZ3LJ3Qs9p/EgucERagluQstE9rFqI6jZqUtXTUXpEFGyMswDEW
YFem+YMY8lPw4u0durIHkd2QBbFf6VhI8wehbDe0XTafS+xBGGGBjeYYC2n+IHBr
1h/pgzDCAm7PWEDTTPMHUenO0YP7q7RjD4IzZAFjITkLaf4geo1YV2Xh6NvsQRhh
gdpsyVhI8weRMGNUx4/9Z7IeYYQFjNsYC+igaf4gLmWPbHyz/zD2IGwMWcBoUM5C
mj+IW1v7L9p70cZHehBGWEAvkLOQ5g+i+KoiFwOPtWIPwggLGLkyFjDWrKPpEaXR
CJOW9agnKCJMSpI6VJVqgeQyZAHjYTkLab6PqMDMhNwf8x5nPcIIC7itnIVWsWGo
gVYCHynfPaTD6T/u3XU8UVeqBRsjLGDsnoyFOEV/iShtcOJ90vbcbZ9LtWCrZcH4
xLk+C8zSACxLwYaDgGUpUA0MlqWwcgVYlsLKFWBZCitXgGUprFwBlqWwcgVYlsLK
FWBZCitXgGUprFwBlqWwcgVYliKjufL2sY8Xc8hKqtC/2ncdNPaPDPUP55tqQnAK
IDaqrwZjGe2GkSBNXw0dbYfhAzwh4XwtD2K4BUSAjU8yXv6/Q1dHPnTgrpQeXg4i
ziTA4elslRz26sAFyPxW9/U4PyJOxcEPVJZdEd4IP2h35Bdl0fY6xJXmKpNYTmk0
jAENhTn0IJ/IWgL9eNJeouCJ2Frg0HIA+Ske1qKMdUuA9UuWBi6HsNLMwMoJyshI
TLKwWDRc5BsZ6cOIpViEgiPjsUgH+aQf6xBfTevXlRl+TOjBL3QVTuwrrF7kyCqG
5BbmP0Q8E5YzwAyuWI4GJmgfG6CfFSuYPnDbW+DcBCZKKScLxQMShSlSBgcfsYgs
b2NFRBhSs4emz0dWYZarjn9cNK8J9Y+M1gQZKS7YYCs5gOnigsLYbQCwYElxWbGY
FjJVLFSF6WIhpnFz3l1ZSalUpqpMqCBj9wA+t0ysd6a8TO1af21lYqQpK5Mj/dss
QtiFqn0RUqqKljZN8Cep+ekWNu0ls4ajTDcnqTBrqrSiNCF9/UP5yKiIyIgovPEk
WrJ17tmKTgub5HbX/2egGuT24KdtHWyTbkMdFi1+oG4JdUul3/p61+oy3rEuDL8+
YDlg0xmzdeS9AOm20o5oLIyBiQDkAzqfaBuZrcNS4gowW4f9nmaja1HGBAlaHOiQ
I0sDmLZ1fIbIbR2IN+TrI63hgEJn66BOjMeiwUOe6seKkhhlBRjHuAZL4fDLDQFG
i+UdOKOGwHYtCZKUk5LArxB8o3x1/oUyf4LMv1XmPynzP5H57Wvp/D4yv5/M31nm
HyHzr5H5N8n822s9E1iVaw6UBACVHN/y7yRhQw5Kn+zh5vDldDoUTYg1EiBtdKjY
KJkmZ3nhikbJuoDcPGCNEjzBGZpxfQVK1kHcJXpCOvjgN578eb+uteNyttH+3jni
aeHfe7fU/v6X/nJeX1/7mxLfdp9aU+93ZeE3a/HAMxJPkrcmufUhR3r+ThIMJnRV
Xa1kNfco09LS0y8wrniU7HEYe5Q6+aJvvSYXLuKjPFxLSiYA4WJn3l1LzF0/fFgy
ejl0NJ1N5NlAJizcTNDwlMbeqN9y4aIPw3j5oM5YvHl8il4/Xv+3PvTjUWpTv3XN
UfdkM6w5MjZYXriiOTIFaaw55pKcyYHHHSEBSJBMLmC0XgmIR2toI6CdD/u9+meg
jY/+czWE+XiWn4jWPlqvCTD6tgI/EHhiazX1+xl5QpK3YJSa5WQO+vH6vz9Vsk/F
G+ZnHvr05lss7CioRMOHz5lpuGxXq/69AMsbrulhpQ1tknVIaoaVpXj/GD4qJLq3
dSz5SaAaUj6W1B/HWN2Xd6zfwq8P9H5neFI5lmSH+j5vLPmpefPUjiVZvn4Go0WE
Yiun8Vg0eDbzLY8VlSt7LTbjGNRQrghHmHwsyWitY8lv/LelY0nWSABQw6+fL2C5
4hQbJetaLC/WKFlDlFt8rFGaHkt21MaDHodDCZkptCRDf7zM313wo2PR0sn8e310
fh+f/6HxovxxpaWBLlaF4eNiMsnY47J0vCg+ioW+UjIBnw6fmSxcDh2Nn4m0SlkT
4A1oDJsDkfmv+1guQPSR2nh9fIpeP17/tz704839tmi8mF7NEcoOYHmx5siUoLHm
iCERnMnx4jotGZKJrSPSV0otQB6u83dPRmMJdGmTt1A5dDQ+snuJLVfXEp+Q9Br3
pQ6fm58+vbnfnzPukzfA9B732dKmVZ+kZtxXxz/Gn4+ODQvzj4oj1qHfp4BqMD30
Yw6VV5UTnXUZ8et2rOvCrw/9oZ8cGIMM0OvY+mGs60MPMeiGfgj9WxbDNAz6GsCG
foAxAQLuQAdTgKUBLB36MbWDUAAUuqEfM5UMY5nw148V9SQrK+MY5YWeRLjQVTid
zmS0OitbSJXcuI6nVQpMbIjI+fCRk4IflZdA8jWCfyN1o2zuCeEzqIu0PdxQSCYB
+QyjV69MMxs+E86dgzEUA9uwdMZ1vOQzlM3yR5ARcXLox5ni01Gon9nUNYsNC6Aq
gAr/qIh+0SQXx/ECSiEogOqI3nhPmiaaOOliQMn3C4npyYeERUZER4cEhGr4IKog
SAkdUaAmPDoCHxuLjg3opQmMiSaFdJFBGv+YntGVqZYJpxH5Oa6pJiiE6qNoadMK
ceC4pP8BHnUaHU0UjRtPCjwDol42hOVb8njC2lwe+q8wqUTK0E5ajISLuxbISJKX
JAo86LYyifYY7osr3pKD3CpRV4aIrRndvBgRZ1fCibgDAulHEvGFRAAzZ/WtNtZN
EY58IVxMd1NLBsN7GzD/XskPGzKeW6j18zaiX6Cx2dtASCaBhcfb7m1grr/qoF/z
GR0nh36cqXSOpCz9W5I6D29iw3HuSvxVEk76oxJCXV3xN4moibgz99O0Jobr8saM
mzKZLGePISWN2U74l4NkpgXLTJykxluUXg0bM1vBxxUOueGeWDbBo3aU/GABr7Fi
dHj8LB/WmPUHw6wxI9yyxiyfKkifxswjnCNmlY8O+jWf0XFy6MeZSuco2EqlCWug
bsJfoW16CQ1UaJruaoU7yYTmjOVRlYXUJgb88gaNG2dUg7ZP4wbNVhhZg0bTAFg5
WING+KcbNO5kOE5NQbtGOG+jC79O27iQTALCaxO0a79vul270L/40oYkeN20LVWl
EpouvG3CgzTBeDEtyYrG7UvJq39OEsMHZsoMASeYWEivhm5HCkg7HorS+6asoSMc
LBSQwllDZ43V3KRGJtqEG5PUTGrUFmgCaXr/qJDoCPY6YOvEhmmgGiyb2GjFiU5/
IG11X5dLzcRGfz3Boh8GH5yjNkQUA+LEBkJtZRlk9MQGGycZTl0gFCMh/VhR67LS
MJ4gmKB1ES50Bk6ndRktNDmcduoil3BFEAbp/wlEmRpJ1AIQ3ppS/UiUwtQFqqyn
TbwwdcFTdzIzEfzQrH52foJ/IHUTbVcK/qL0T1EbpUGeahp+zIbX5nnBTpdnQi5d
nkoHXZ7EXsyzG3Ur7UcZTJncBX3W/wQa5OmcTZenX35dnifz6/L0y67j811mZaNn
pL9NcssAtQOYmsbQh36cuXS4M8OXjpNDP85aBhHpHedI1tOo1ZxoT4j2gPAWLHaO
SjAWokkxjmsS0cMlCrNOzk39w2M0oS61I/qXFz6zxjtHaag5QU2MIE1QeeLMcTxf
u2eI9EovkgO/g4IxUOF5fJghNFYDm077Q7vC4ohA3ygNH9MTgRILgk0TzUeH9OCD
pG/9xdTEXShHAkMCD8ERUdQ6pCzocVM6ddy0CumBTyzQzGqSnBxXX9PTP9ylVpQm
OjSin0u7kNDAiP60xsABKZK6O1le7iTrQzPPzdf40HSjFShHqFX6/ISHCKR+tNKZ
MM1RQvpbiTSlOqULNRg0VP1HkfxkpDAhiuUAZ3KZxv1N455h1MHlJ/k5UWmX5b4j
dbncpA1nT7pwOUkvGjeEq0RHOg+JbqJUvIPIN67IFzqsKRH1GFjuQkRjBSMcDRFH
NxjpRBHxPe2oi5FSWiwLY5ECZheMn8tEzAfjaixksCH9MyLmI4yUODEfTMrm58R6
RZqy1P8dEX/X5cQwGD1tODEflKELJ+aBkWIvKR84vM8X/KApsOkGcS5A93xQNhg+
CNefbrDA8LEEIIZVSVMKxoIwhSZNO2Bi6DpRag2NiZxoaGA+m890PdkUhBwsz3gb
WZ52ujy72+ryzJ1JlmfWT+dJMsvyzC7jM7OMTztZnrmuNzBt+MhhrvF/ThzuzPCl
4+T4nDhzeWZ0nByfE2cuz4yMcxQ+QtOfOrWbws2TZOY4V8w6VVMqlEqlimThuAoU
0AMdqCq1pdFeCjcV6FSfoPNUeCotyC/pi3NgXCWBIyAtVZIcWem/zFRoZ6eSwJ4q
D9342pnG0PIRDxrnS+MayuL8aFwHGteVxoXQuD40LpHsJOIyBpu2ghoBa7hC7cBB
PUAuQfVA9kBcI98S0hXqBmoHaUCnktKhnB5SGFSFr5QW+WEkyOoNdYi0UAf45gXS
QsV0ldJCxYRIaaFi+khpAaZimFpl9Y0yQMUg3JSKYbD4TSpJ2rlE4w+eIfUPnhHp
3qmC+5ib1cxMxE+daU1Yas5+5gyn9d0PKQOqwfTcJnoHHCpvk+TYpi08MKv7+lwT
YvncprwXIF0Tkvy8DgtjgA8OUg10eFMCmotl53XS+90PkK/I1/DtDggVpx2Tx4ry
F6UBWOkgwyF/2Q5ViCvGM6NlMHoiR18Wo4pwhQMsPe3BGABAzRjUh+XbZcUCo6IA
/QKzCkQzMV1g/Q0ubM3LdGkdiahETWy90C8qSNOqqLrp1ORFxcexLCvq57wXyqJd
+GlfVNOaFR8Rxb1ToVmtB2FTBFSDVbF+Sy4jFCv2BIDu8xRreh+EZSrU8KgrQjGs
0o8VhS9KA7DSQXxC+DJVLFesjJYhXRUrbsYqKi0VK6sw/QKz+8m1jWGBjSlWEaZK
60g+qVjlRU0bbSMWVdyMa1hUjDctK2qaK9a0L6ppxZol9UNWKFbrdpzPB6rBtGZl
DpVXghNdT+rHDj99iW51X4f7HM0qB+gX63Vx/TAmBHAogEGnWRGaJItBywHQ14D0
3o7DhiHGt+MwWWq4HYeVhpUO9QLpi5UvoTNwuilDRovjD3DaKcMA4Yogc9txrtGr
PfdEu83lP063zeWJtFJUm7rIzLptLrxsO84tznA7zl16dc6s2zrDy7bj+OTU5bk3
py7PBll0ef5na5jnMHr1yzpTm/ZkXjEt/Avzif7D1HXOTIRtQMhza/aVBtt6UDtK
O3uBBvRb7XT0kbkM6XfRa0EH8dQV6J9n0dHfy72y4TNSzTb5dCxqnKVmMKeP9GEu
He7M8KXjzMFaBhFpFWcO6cGnOaT1/RyJB5Vprjap2vFCCnNcxuz1+Co2nBg5uCcb
JCQ7NIKMW/rHhETwzv7hQXxITDQfpQkMiYyKCPQPLU/lLY33di/D124oHEcEJbhp
4D/APyqIpZSqu4G/Jjx6gIYmK54m2YaK+4XKi8ccU5BdkrXtfDYT1rYjZqcbXcKE
gvHFEbEtAeIY0RDMhDQF3UJpf8JsgRLS3+KkJrUSmlOzsh01EoNIfhInbdpaRk27
/TTuLI37k8bdp3EfpLgKXF5SnctJzY6cpB3Hk36cOME/litJ1tHff0i/b3KFyXv6
u5hNfpJIH7RuvgIAD+AM1+JEtFhqEtFqgTBuTkRzFzPo+GQp29AVRHQbuuKIbkPX
MiKaozCf9xMxH6yInyW6Fe0/iW5D132i29D1gYj5IE0FTlwJd6SuOifSYrUdRhb8
iGtH/TwRZ/D7cWI+mGQay4mHOTEzsE6iQZn/kGjwXG9y4hWm+HuJRrDSbEQa9As2
6QEagJMcM7uRJ+qOlQtxFpjdlgDE5QRfxmwGw3vZutvy2nyI/XUhHP7r9p/O83om
MU/4I6WNYcK73uzEPGOo87NdaGBGo8ntdRDvhbR+9mJaVG9kpolG6Uk+HX1kNh19
fOaJZszu9ADuzGCpWQOkR1xKYS7PjI5LKczlmR5x5pDWZvCnkNb3cyQH6d/fqFN5
K9yELWWf2HqmclN4eWvpJDI7gQzRbIOaK40AFQ4wCx6lwk2lcgWlUqHy9vbgYyJ4
pcLLzVOFk56+lWshmSclEjJXK5RuKpCovBQqJV6NIVGoFR5ebsLtFZ5Kb1B4KrzV
XqBI+obKYtwsQdmAtDRL5LBk41424kPD68vimtG4dtR1p3G9pAX2wTR+OA0bL+2t
Xkh/r6C/E+jvRGEaCnRs8js9NvUhHqaDj0SP/OpLfpgZzaS04A+mDvwwM7oTMS34
6yVdYWYMltLCzBgu0cMkGE/EPPCcFko0MCFWSDTQSgkSDcDMDIQDeI5wSAe9hqeS
TmbG/zpQWJgBzExCdTUgxs2G7rai2QCzhLcRzRLM1nXnDGf3QM9LJhDo4zPpzJiJ
Ngsz2Myw4n8bplQtYC7OHNJa7X8KaX0/R0GUor+6KtzUrqLOU3kpofPcFUpRK9aq
7AutSFWq2s1LVK5Kd3dXd1G7ql29vDBg11K5eqrcJRXs6iHkpFS4e1EFnRumQMbe
z7i6xv2B9FLXqQXUvaiWilDeS2JZWto26Et/N6C/W1L1lygsrUIdsT3sUGtQi0x9
Qj1C5TH1iNE4VCjUI0b4bBTuK9GAFmNM0ECatiRifri7ufV4e5Im6/HY6GZ97+fn
AdVg2Xq8Jyc66063r9s1IWJnhF8f6OywrVO7Hi8XWWgu4no8QnHik4GJQfQ1IL3X
42HuIV/j6/GYztSPFS123ZKu6MAHRDxEm9AZOJ3FzmhRd3DWN3taCFN8Wt/smTY8
6iwVNFE0bjwp8Ayk3lLhCWtzX+rNnsKkMTHspkijP7A27KYQPNY3e8p+fAKm0mXw
mz3ljRk3xcyPucZsrojGGrOpFyGm95s9oY0A5AfHGjMauWWN2fpmT9mPT8BUui/w
Zk95g8aNM6pBp9+bPU2P6zAOhYRPxbjOejQ4ZUA1mB7XQX7AofLkJ5gwMao/nrC6
r8N9zrhO3guQztITTDyRxlWfdYIpvY8GlyBivsaPBsMq0I8VdSwvBgixojgSdSzC
EQZxxXhmtAzpeoKJJ7qKAjWrfn2AOUvkPzMqUFGAfoFZBaKZmC6wvoXMtIPp0jqS
T55g4omuaGlzrEcsKp46oF/UclKY+aKCccP3EltQYjQ6PGPDxPIRmH7BkSL1BTet
Z7MR60HhLwNUg1XNfksuI9RsKZISNZveB4UxGkG+xg8KY8ZGP1YUxSgNgFhRGomi
GCIaYXI1y2gZ0lXN4masotJSzaKiAP0Cs/vJdY9hgY2pWRGmSutIPqlm5UVNSzWL
pw7oFxW94NNFBeOGmtKCEluuZuUFT281mz31w1nrseGUAdVgWs8yh8orwYkO73PD
jLK+fLe6r8N9jp6VA/SWLlOW1YbI9SxCv+SxYTZEMb5MySSr4TIlKw1iRXEkyuKK
0m9EoCzykmNHBpx2mVJYeZROLn+7x4ZhYPtlMzyngFron1l3PJjIjgeTnIYbCHfR
68qcuuPB1WTHg/s74HhwJtvkM+O6Qybxks+83tGHuXS4M8OXjjMHaxlE6MeZw//6
/RyJPZVBmWysRzUtZ8LIKn6yo5rGrN//jcOXSdbW8NlMfLutQTdig1kCg4YjYusA
xHGXIZhZZgq6xc9IwvRuCelvao/iYiRJSFeuJInneLJQOoK7mStMTtDfjzkcwc3N
JX9FNu4NjnD9XzmCi3LCdeXE6Rqkj6d+nohlW8iJYTBON3PiFh5stzkh0eD3Y4kG
DZdNG8DEBfBc5aZqaek34x/xFpiqlgDE4m0z5qgt8kyL7y7AbJ1IzejkNNKR2hzi
2RXQn7TTnY1JsDV+NoY46uifyI7g7s2EI7WmTNX0AO7MYKkJAaRHXEphLs+Mjksp
zOVpLs4c0tp0/BTS+n6OZB39+zN1rmqFp3hOE9t3zBwn9VS4646TmqbTHihN9gFU
38q1hUyUCg/hZm4KlUo4ZuJKs3UXj40KFJ4KN/F0q1rhqvISDpZ6KlyFIy1J/4M8
G1f7KAOQlmpfDkuOupr6RgVUIyRmFhJGf/eVNtKNor8n0N8zCY64Xiei+mQTtVDV
aFy4ptURV4SBF18pLfKDwEdaqHHUKzujg3lO0EKNQ9aDBuo4TKKBGu8r0UKNj5Jo
wNcEiQZqfKZEAzA1LszBEfE5ydV4eel3OqjxbwlatUxEtQyTIVIyQzCDNJEYzjiB
/nomkR5HVq/Ljrju5czNOFlhxecgrdXqp5DW93MUptebUlebneRUequ9PaHjqFft
4Sq8eUGpcHVTqzEM1ZKp1G5u7Fiol8pNOhaqUnqKUxfpkq1xZYjbAOmlDNMCWei/
7FQ1iGPgcvSXgiowL4IxMMoEJSeOl3XKB1coCygfKBU2hsTAhCkfSDcoQigfL4kG
MLcCm4OkyQqs9aDo5wPVYNkKrPygqHWn09frmpD0X4GFpciA5iKuwCIUJyEZmJhD
XwPSewW2AhHzNb4Ci/VU/VjRHmalQawojkR7GCJd6Ayczh5mtKg7OOtBUQthik/r
QdG04VFniaCJonHjSX1LB0XRvQHkJ++myEt/2GrYTSF4rAdFZT8+AVPpMvigqLwx
46aYEzHXmM0V0VhjNnWuLr0PikIbAchP3pjRyD/dmHEnw4XDFLRphPM2uvDrtH0L
ySQgHEsZezk/szpIB/0HkNFx5mAqnSNxIWI1S+3UTdtOVSrhSCi8yWZSk4RZvOqf
k8TwgZmS2vBj7JVeDd2OFBAaKp5izhQ2dISDBbxACOGsoYuTrebHezlTP96zHiBN
GVANpsd7UJJwqLxNkmtDrOO9r9l9znhP3guQztKTLTDZQPd5J1vS+wAphDbyNX6A
FBNR+rGi7kVpAMTi3hBZ0L0IRxjEFeOZ0TKk68kWxgAAalb9+gBzlsh/ZmygogD9
ArMKRDMxXWDEpPl34eRFBWlaFRVPHdAvKgzRTxcVjBuqaa0+NF1iNDo8Y8PE+idb
5AVHitQX3LSezUWsB0i/DFANVjX7LbmMULMYKYPu89Rseh8gVRIxX+MHSFVGYkVR
jNIATBRjuwNEMVPMcjXLaBnSVc3iZqyi0lLNoqIA/QKz+8l1j2GB00XNyoualmoW
Tx3QL6qbFGa+qGDcUFNaUGLL1ay84OmtZh1SP5y1HiBNGVANpvUsc6i8Epzo/Ino
9OW71X0d7nP0rBygt3T50lUbItezCE2SxaDlAOhrQHovX7IhivHlSyZZDZcvWWkQ
i5aO+0MWexKxdIhAWeQlN7OdDwt1/wlE1gOkuJf1AOnnxJmDtQwi9OPM4X/9ftYD
pJ/PhJHV/WSf9zRm/f5vHBm0HiD9fCa+3dagG7HBLIFBwxHrAVIM0zESDiLf3gFS
mLgAnqvcVMXMCeqI8Y94C0xVSwDicoLP8ACpcBKDiCcxhN0StrLdErbJd/fIwfL0
kR0gXZhZlycvfatV2A2URZenj/2n84yXvtUKszW3qQOk2a9rD4T6SQdIwwh2EM40
Ss/n1tHHSwdIQT9K2FloylRND+DODJaaEEB6xKUU5vLM6LiUwlye5uLMIa1Nx08h
re/nSFbSv0upUytc3b20hyyVCqWnSvjOaHg0dvY0ixB2rSm8vVVyGi+1pz6N9gOk
yfYB1RKPWLoq3D2FL50pFd6ursIHRz0VKhrkICPxUKklEk8v4bOlHgpvL6W4J/V/
iVvjqh7cA2mp6uVgh0azUUVlRyWhboK5NI1xoXGuNK4aDa8li2sgTOdCHVIFSHmm
ZhwJl3ajDqW/R9Hfk4TdrteJKNfZ5CzUMxoUrvJDo1DVyB/qElfUA+Qy/IgrLaWB
HsGaPDs0irpCPHiB+gQ98qsl+aG6oVCQFnxgXgm0guom4n2ggjUSDVQ3dtmiLOBl
qEQD1T1KooHqniTRAEx1Y/4JwHOSq26cfkwn1f0tgaliIh0ahZkQKZkegiomxlV3
vOzQaIJ0aBT0K7mMVt1WfLtIa1X6KaT1/RyFZQOIwtrip7qVCrWXl/SRUJXaWzi1
qaJazx3KSEbj6iHRuKnVEo2roNOS0jxH4yqQjQfSSwWmBXBUNButY1EllKa/KtLf
7skOfIgjY53KwRWqCyoHaoqpHKg6pnKwBx40UDlQIzqVY3qtNbegnFO91mo9Kvr5
QDVYttbKjopa9zR93Q4iDp0Rfn3AnnOGh/bA1Ky1omMzoLmIa60I/ZJHRfE6FuRr
fK0VK6f6saIVzEqDWGZ4wQqGSBc6A6ezghkt6g7OelTUQpji03pUNG141FkiaKJo
3HhS39JRUXRvAPnJu6mKGA5WDbup/k68zz9WZ8lRUR7h1s8wpu1nGOUNGjfGbIi5
Bm2umMYatKnjoun3GUaxQUMjAchP3qDR0D/doHEnw2XCFLRrhPPW46JfwXFReUP/
1o+LOtImXIGIewaEcZ52RBcdSBVhtHg+pRu0Kd8jyj+ypzSYM4CNj3UwJ4OujnyM
DObQWPH0vpfcyhxW9zU7JhngB9jDZVf0NjaYw6PG7DLUxpuS9qRxqaxGwxigx5GP
lzZEbBviYA6hlYjY7+HQchgF3KcGc4AwxCK6NHBmBnORLJblZzxWatImYnEP07FM
ChmPFeWhqVgmHY3HMj1oPJapfuOx7JkYj2W1nCx2CIuFxjYdKzUbE7FMThuPxaKU
6Vg8V9OxsA5MxzqajRVtFlOxbFRgPJbNWBqPxRym6Vi2v8d4LHSc6Vg407HiCMlU
LMZFpmPZ7K/xWKH/m4xlH6M3HiuuXJmK/c5sLG82toTZ2JJmY0uZjYX5bzoWo0rT
sWXNxpYzEZuTPJTEkTcRZaZPpI9E+2X8AmdWf7r5xSeOh16FWJ/4/we/+MRhV1Ql
1if+/8EvTsB4Cb/Fvo5QRyJuq4FfsDI5aAdDKxnQTvzrBs3iAVf55AigG94jC2Qt
N5dTP7xnRInCqpzOvBfNWeTNdi0hBYxJNoSHCcfmqmA4MTqYK2w4DyMBfvAP1Qw/
W0Vi5jKbz4KCBIxVJ8KQDsMIpDWsTtRZ4+biHnNe0z8yhnc3UrsoA67MwDRduzAU
4cfd9AEuLKldVjIoAiDlJWvXOu1KhueWViWDwANSVjIYTvpTWmlRQhi9qS+h4eRT
Dh5lBtcoJxsq4k7ob2i/4AJheOLMjzpifjZ9lYeWvh69uvbzj+N9mzVv65ts08Kn
JrOqiEloVGxojPUVZ58GqsGyfQqRnOhKcaIhP4y6n4jOsLe6r8M1IWLfhz+IiGAP
GJJDGDRLU1tyYKCWk5M1BSNh8MGhtzNAW4lTWwgtLcuATZKgrwGfmtqCTARdSvcp
QIIhX4QCoNDtU6hhMhYNvqbJWLT9OiZjIQHrGokVtQCrJ8SCMg8RV6J8iTTdxukM
IUbLjhNpDaGX2mAEIDl2QIjEIrAHIAqhZJT2OIzSxvA4zFKC1amt2n2xXjbiqW/k
edJG3FUxkLrutoanuP3pNbd9pDZtfCZd2oKZdWlXZhZPm6NB+NnFG+QTQvAdN/HU
ehb6Z6VtaWHXxhXqmmTKIfgnUpeQdW/DZ8THJrnhh1rghZx0MKe05OCJyAGDPB1P
MjZPnqQszhx4krG88MR0nDnwJGP5dCQtaVQz6lr7Y4uIb7h/aNwATRB2mbTuF+Gi
tTQg6rAxxDc0sqc/VhVbRcRGBQrbItv6R4XgJGY4ySvSNAyP0UT5BwpBDmJQy4h+
fD0aFBHF9q/UjgiNDQtngY4cJ1onMWCDZE9NRgKZJjokKNY/FKdpk+3OFE7X8rxu
T02gkDyad06WT3lSRp9Q2FLjrLt/efKdPolwPDea5MMyrbVe06NedeY7VAKUCa1i
oZ4B0Qg3BFO2pqAb2LYmbD4f6gh/HekQVFyzUJICpD4d4nWkoaHSvP5QOjCaSMOW
0LDNNOx3aaBxiV4fkPL0yZUiHlxBOlA+THSDEAD5i0a9bmCAwS7uBbNBScT5f5gl
9Yk4tES5sdcCaWAQhBJxfQGGw1AiDtKwNgMdAXqUe4lEj3w3S/RYZfmd6AZGl6Qr
+HhAxH0ASJOXE3lCXh6cOIjBQ2IDObY+hzqHUGEqHHEoG3j8TBUOC5oQt0YStQCW
/KSNj6Aaeeom2gpfvJPRxJM19Gpvs1eggXU2UfqEKvy8dLoV/gTqlyUV0sJEWGgr
mgig8ZNOt8J/XeaPzKrzk2zJ85EDNMLmrfy6jVx7JT+szO5O1xukhwrXwVIVYA48
yVh1ZA48yVheeGI6LqXgiek8eZKyOEeym/7dTj5nW0t5jmseFRQSDsltLxzjFPbC
lYGwjYmI8Q+lIpcpn3z4uqebl3Cg01uhdhcOb7q5K9SCp1Ur3rl1XKSGb9iwYXko
M08vhdJDOCDqoVYIiTy9vBWe8Li7eiqET46qsUfJG3881Gqcd0n6BspgXDWhTEBa
qiZsGsPfHMRbWuT3paK5AxWpAdT1luZjY2jLGE7946mbQd1C2TztKqpi1lG3kfKb
SHYS3dI6gPxxV1zZDAfmqXAvqCZfojuB2oGI878od4DkB11vyQ/VFENE1QIZOFwK
R77jJT9UEzajww/VtFDyI80qIt4TqmWd5Ic6wkZ23BN1z9QRRrEA6hkdhKkjqClT
6gjlhtOqI/GByasjJYCgwrCZSJ/zxC67BJm/O6fz57ZRGqgjaOn4zLIXPtjp9kqS
LDqVslDyQ6X42EOlbOKSq5TUliStwZOMFePmwJOM5YUnpuMchY89oiGwd/5kSfZZ
ZuPeOvWw51Plgb/C5mZXQSJR6SVI1TTP0riQY8039ULOh5hrsdmFf07UlRB7AqlE
hZArdV5UMFSnrpYg0CBwIEDYYhFoIaxwhQP/2HkDP4RCCckPYVVJRusq+cE/lguQ
H4QVBAr87Ag98gOYIBJ7vqEggoD6AoJomOATp6R46pSc+DJE+BNkfqWNoU0NQdRd
EkSweXPb6uzfhTK/UnrbDI6X783EN7QKIuB/UxBhiNmWaKWGdozvoPs4vP61aSth
77nCy1MwjlyVCrVgLqm9aRg8Sholvk0kKZ3zNy6icD8gvUVUXvrPnhShrpRkm1Wk
IkRFu3UV6mpT14SKGUMRBZsGogZXpAP/WJGEHw7DcFwhoipKtBBRKqKzp7B+yOwp
THMze6qJlA5gIqqO9Bt1IRdREGemRBTygtOKKBhkuj2bKQUafojgE2e+hUUYm+ta
u+a6zL/X9noDlg5gaZ2l98f+RN1KaRYfYq+7TYLWn9s2gYqlmVxysZRa7tMaPMlY
UWAOPMlYXhyF8wH9qWsV0iM8JDgk0B/vLszBcR000TA/kl/q8c516oVX4uvUCyoP
Ivpb5VGJp6ZKeb46767woAZNXiHYSxvqqlaovUgeIdRVG+rmToMRmvTFOTAuvsAR
kHrxhVxNt/nc9F8WUoC64pJVU4aGuNOQJtRiCqAukfQkuqGgmEYUR7giDRxmLnEF
HbbzwA8RVEaig+jC2Ad04B0iChYZRFeA5EcNMXGFZUQAZZeLK4i5DBZXqYH+sBCs
JhBxVhP+SE7nV9r4/A+Iq68JPMlocaUm4lcpZOMrPzaUsjft133O9DMTGhcOyAhI
b+FgDBiQ5aDdOAe1UHJQ4YBhEqqI2RtsyAUHPuBYp0dnh10jhuUwunuK7X3KS7sx
RrMp3fvUNDY0JiQyVP5VDOsWqE8D1WDZFqgmnOjmUP9YIl6xFSVCulrd1+GgaSFA
4D9MREiPVNDo5rZA9dcTL/ph8MH5aENEzSxugRJCZRkwsYS+BqT3FihfInFnsFEJ
obVMxqJ2YGcYj0Xbr2cyFmKsvslY1DeGM8ZjYVNhPsZ4LJ4OVkn1Y0V7yUcMEGLB
A4aVsJfw9IWnzensJUYLmwpOay9d1QYjwNTK7DDqenLiMOsWdTm43MJGJTSOSCMr
rYVp5F4un0E+2PDU2qaakLYmh+FaT63/P1u/ZPRysCHgxKz6G6rEPO0z6/Lcn1mX
5xo7v0bPhNfIy+0rlJaXUjN83nBJB0vtCJ6YjjMHnoilZ/i8dDpYygtPTMelFDz5
esrgSG7SqGsc+6gAjAVh70qYxh87WcL8qVkhBWmCgzWBMeWxCqnbpxLsH0atEDo0
zCMPlVkcfCQNEqjiCM9x4qafzBzXOra3Jq5cNB9mxEoRvxJQguN4Xu+oAt83WsHr
b/K34TgHjstnitzUznkxGWWlAFLqZWo2pZOQpjVlkg/SxPiHhEaLm4GM3f0rYTbp
W3nQJVJWdyWEuiuRgrorkYoH/QWY1Y2XfIhuvIQHD4ijHkNYPl6COoXG0K3JO1FT
oTTpIcy94sW8mPAgZBodo+0nVcgH7duP6UiGg86hhgdXmfThqpDVnBsdP80kye8v
X4vHpAh0FYyR0kRU7D2IOM8LYyGSiBMsMJSmEXFciLj9RJwbhnH1gYhvYMbYy5UT
9R4MqlqcSI/ffTiR3pG61ZxIj4bJJmN8iQjUHXhgxkUdYjgZ4yPRmjEuTAGE4iqf
bL1b8vOC33C56hzB47lnYAjAGHkifWQB/nhp6QrLVbkz8cno5UCe2DXX3kb/PXli
Pj6ybWUnZf7uWXI3NG5cpBQ8Ma24eJKyOHPgydejmFMKnnw9ZXAkP9C/MNSFN+cL
24fYniW/KE1QSGCMJoh3btKqvKCFhG/3KPBCPleFStyv5KrwVAuv3lcq3D29hTcI
G0uowsv61Ap3cbeT1qNSuLkKa2dJXwsjxoWzNJRJU+HMkFn4l01amMsjvauiMhVK
XtT5aietCGksvT8jiIaHUdeXukRhXgNSSBhBEXH8hv6NKxweN/JA/hDIuDvugd9M
GMNhkgxX0PpKVwjkxkQcf0MgB0k0kB1hkh8Cua/kB5hAriX9Rn2BByaQMWuehgL5
c4GuN1fwJRgIT7CXIL2sFH4fTvRjXfQkl/zDinIwgRxpQiBjxAk/BDvJIr7mHv6F
WbAnIS0FckaDJ1+PMEspePL1lMFR+FLFj9R5uyuUSvZRMVHc5YGc8lZ74cXrrgq1
hztORbgq3Ly9xRBvDzeEKBVqd6XwDROlwkvp7YZX6xkTha4QhVrBR2ndvLzFt7sz
X9JXxY1x0QzugPQQzfoQX4zkRKmcqauifckSIc0k0QwbO5KKzgHCfgq2KAmxCyA9
fuMqijnxZDf8ELewb5EnxG4zohO7zJ6GhIA9DVqI3QGSH7XHxC7scAB1IRe7mA78
wmJ3jODT/z6tWMx42X6K7rY6v0+m5Hsr5GC2dQPOuG3dXdr+JdjZsq1g8ZmtYleE
pWKJJ6bjUgqefD1lcBS6SAB1tTShEf34mJ5RmuieEaFBNSGujO6yMCbDLLJKkzLw
XsZFJu4NZITIFEVkPspDEepKSvs3gPKSpVuPip3m1LU3KjKRHr9xRVqIQWxBgx+i
r6Tkh8gsT0TLFiIT4o6JzOaSHyITaz5Ix3E6SxW0AOpCLjLrky8uMtm+jOThYmNO
ILJdsnq7Z7XEekCe/gT7OCIN8sTWF95WdwTgpMwfn0lpFZkCLBUpPDEdl1Lw5Osp
g6PwOddWcNJO2SyGO2TZtVVdnd2YXRjZe6uUnkgBrxe17ySvp6c7vEnpmblxoYib
ARkhFMUJxOxUsLB9uQylpF28rjS2OnUNqDMUiuyIALtCuLE9uhBubI8u28uCPOFc
pTTovzguAD+EIiwskSedUITwA1AXcqEI2i8sFE3ZkRBUPrIzTE9k/oV655nkQJ44
UrDQzvA7BoI9mkVmj9rr/HxWnG2yCkXLhQZPTMelFDz5esrgKByIhHjxDeoVGw2L
zY9vK2ymy23qaJPM20x4Wb6rq3B0k13U7rgkpVvOxsUhwoCMEIfMRsxOvqOuglYU
oeeKIq8q5Q+nqBoSnKTSF4dyGxFpIQ6/k/wQhxUkP8QhZAHSQRzidWYoN3puLckP
cQhBwexUJg6ZYEBdyMUhaL+gOEwPMHFIiHFxuFf6yCf8CzmdH0P4/21x+C2AJ1+T
OEQ3hDXSTPi8jSRxVJ7yS5IlRMaFFHsleEYIKXMQBZEd5S8ndRjs6vYcQ+gwGggd
XJnQQRwTOmyACzChwywWfaGDbWffoNARq8rwmzvlCPSRbi7vuswfyaX1mrYVnw+e
fE1CpzQRKfoIS8lqhZswK6b2lt6f4YVv3YqLzpZSGhc/SAl8afEjnnnKTLt8LuoK
EKwK64sf0ED84MrmxcRzSKL4wfEH+AEmftjuVpRNLn6wIvwNih9TNg/ETHeZyHki
88dbxc9XAJ58TeIHu91KUCe+s8JD6SG+rcfQk2Q5qXEBhKTAlxZAzP7JSkUM3oVt
TADJ7R8mgPCbCSAcH9AJINNnrvJRKm8ieydTeIRCu9ES3w1tHRXpWlHY6hrbhA8I
jYgI4p2x/1LBu1fiPcoT69fTLIH5r6dhVA2BFym5UQSNyfBcj9V9HY4JD/j1AS3u
DA/taThfxR48Tj6tpL8yczYmw+QOVgEDmot4vgqhvIyK7WYDBdynzlcB6JcQFSwN
nJnzVZHy81UQbMjXp4+WWIpFKA5v6seKtg8rDWKRK4ZnGskvdAZOZ/vISw6k4IsY
yIJJdQZzUt2chtNJdUaUqF1hwH2YeYeqAYwVEWFIIyyVSunkgJlJSEtsfA/Bt5ix
AtOutbDrPdpIwcEQrnCA6YILZ+wlpw8wY0nBWQHxdIGUFRCTC8kLWCcwxqWyi1TI
IEGz5eI4W/rfhrPjuFSVG8Zk6sttqDZz8EoiKleUXhLjwl3QjFBD4AJhaA7Mz5Rt
floP6FdtwiP9Q6BcY4TzIMlOOVuif6u09g+IDfWP4q3febAUqAbLDjnjlAQcXoar
L/it7utx6GCWKmE5IBosPeSMXYPyMFEJI1R8o7EINi5AXwM+pYTBHeighFkawIwS
HiJXwtiAg3wNjwQzfhGLqQmMwTHFgHz01SyjxRYfOK2aDRCuCIIHyYnB9xbEl1Pw
0qtM2FubWLifjY8evfiCulGc+II6sOOTKVLw/0TdTBvxbU75ObzZqZL2ewitbcTv
IWATZnx2w+85XKNXZ7snQlrYywWziC+Ghv+C5K/A4bsKXkI+v1Jnn+0/IRx+kv0/
gzzv0ut/2UUa7Ml/kkPHc+4iOp5JLh3PnbNUYpM7ApBPFOhziy+b3kjdzNz3tP54
x3sNn5FqtslNGNQ4L6TWwZyekoMnptPxJGVx5sATsZQMlubJk4yNMweeWMvAkBZx
5sCTtOfTkbSgMq2pjbHvL0gfJKiFF+r0jVZgzUsK8kWQngHGPpDA3tQjfUJB/92F
0icaZG8NC40TNkppoqhNyzv78dV4nLIqX5OUE0mbh2tc+IgoPqZfhAtO0wrbDIRM
a7IvIMRU4oOC8VGIBhH9+ICQHnxINB/TU6PNN5CSFhZJm2KjqnAGWSqJcNbWILwW
C6+jzYIP0MT002i0h59r8S68b3l+A9+qblMqIQVqb/cyNIfw4JAgIUUIvh9BWSVF
xOiWfHSfWH/UmbMG34QQf5RHdD3Rio2JkE46a8S3ctNcolnqenh/Gl6iFhyULpUt
fKfCnzUA6XsbrfzDcPw6OmSAppKu0gqZjqyFyCRrszIabm1WqWpWurEqDC+YbBwR
mxkgjjgNYfmUc3/CvsstTjznoWnxfr8yUh4qkpfUIQ6kFSlAepGKZBopRbZK08kH
KOVNal6+pS4vpyC+3HekO4d9BIQModf5XF6ygXMge7kC5DxXUQi3sXEkeW2K0WFU
MZJInDndt8oB8ADOcGUDK/aOQIhwzNQjHCN8FRHXwhBXh4jT2DCRsYWUraP1IuIr
UWFW49g7tmFiD9JWIk6Jwx0g4j2wDneTiPwgr7eSH3YWvnaCMyuO1Ply4r4m8Nhd
8mNUP0Tyw3iez4m8YR5lAyfmB572cuIV+Z7nRN4KE9SKmDdmO/LaiE8Eth0Gm/Cj
y7D5FJjxAJ673FhHO0HdydcDLTTWxwq/IvWMUfELBU9IUcEIFrZg5hCN9fnU+dme
TGYEywEaVJePvXjKElW111F8UzT88XlEP264MGt3gQZF8MmcfMAgB2gw3lqYXbfu
p8wh+rtR191ONJphfN+zE41vbDMjDua2nIppL2QR04LnvbllPJeU8Vwq+ZqkHIzG
p7SOnpTZ2+B/21g3B56YzpMnGRuXUvDEdJ48ydi4lIInpvPkSdrHpRQ8MZ0nT0zH
OQpvIlFwqVhp9OI4MxPI8qljyTQzMZ/uJJ1kEE7BhkdjqbhZBP7io22iOUWycVxM
dZXCw9sLdlR1tRr5q9QeCrVwNEzprhB2tHh4K9RKau+4KRVeKtgHLiq1wtMNNovK
3ZUSOwj38lKq3bBtWKVQ49XBgvMEuXC0TK3Ph8pL+OuJv0kZUW9Zv716M25uoR6B
tDS3oMrxtxwJpPfrJZgBIn6k5sp4auJMpW42NUtWyvYEbKcqfB91x2jPuEJNjCey
bdpvaVgOLhutcDtSlNMtgpSkfmfqEsl/hG3zFgEewBmu0KfQVIFEZ27BfAJf+P0j
Ec0omBfjiW4HwVTJj7jZRDSjwNNKIupB/IYdAVqYQfskPzTiMSKaPXCYuIPJhDRP
iJgHTBuYYYiHKZWDE+8DE8qJE+8LU6qo5If5VFLyQ9vCvIQfbcLYsgxbYHFKqwWW
utExIWHCd6V4v9CIGOsCy6cQjWowv8CCB47Kmyc5NKwtkpNP7Fvd1+EyYoFFnjfa
hrjAwjhgYIsp0jpJui+wtCRivj7R4m9Q6HY5YFxqPBYNHueK9GPF8R4rEWIx3oMg
xGAJFEJX4XTjPf06T8EeCFY0eQWlXu8xiavbA4H7sCEtKg7QLyKrUPkWAVZE6Am4
T+yBSP6iWgwI1RuH12b+2YWKav3Hj/2J9VvBHxz8nTY8eLlNHR2Ns9G0s2fdF9Ji
AKlWj9bmo1Y7CjQIDw4ep6UhZLLWHxycS3ZfBy09ITO1NLNn/SxLW0Hm71jrGY6d
CxWNBwrHzAVQyWH9rUOSMOcD48ZE03GSG4P6nQLp4Ne/A2D5PhGx8bMjz8hL3viZ
vDDW+B0ll7L9Mae1eSBPsd1t1bZlsvdvXbvusEXWxj/q2mnZCbJ+UFLWV6br8vEZ
Kkt7Tttmjx9bIOsrnTCdJuVTTNv2Z8+a/3/sXQlgE0UXnqRpm6tpyyUIakBu2gLl
RqAplyCn3AXFFlqgUlpsK4IoVES8UBEVUQERURERFUFRAevJr3jixeGBBwoKiKKi
IvDPt7OTnWw2zTZptKX7wXZ2Z97OzHszb66dvBHq+DJvuu8OvN0bZ7t2s4X7t6ge
uE2+egAOAVCJqM7Pn0hrjuhXy6g14uQusBIgEtyrkwPKqwTo/gDEJSoB7xa1lAB9
GC6btOwamB13snuYWhHskiJ0lGJEHIgXFenp4esvzp7VqhTPqHx5dV+bVnf4xR4e
/tjJLzast0/0HCMe4lvZ+PheLY2ynj+RFq49pKzcxyXHBWihvKV0XlmlhNjDL6XA
cyf80KUPddNn5BRmTc5RHbfhnjBLmTnJc6bmEwumTcjNp3MoZpAXqw3uSbn5WXny
fMkPZmO+xAExBJ4voUD5fOkZ+bqeKGNW46p8l3q+xGcofLFFa76EBmcE/fuZt49j
iyUj6N/PZAN5AFf8UUSer1zRU3pm86WR0hsKxLkRLj5f4g2vFnhTI15lzJemi/Ml
WJcBvWemhxPL+76RMwCheA9D/ED7vsGbiBDmPEgO0YhMRmLOg3R4j8ezrcUi/PA2
F7w/i+BjsG+7qsGx2D8BgTnGlJcXnxq8WgSCui9HsQKBOBP7cn/OQK3dl8gMsiyW
l0HoRPgMBu4G8XMr1HLtrJevG+zqHp4rbQfIy82Xu0RjCTEwIIbAXSK/ILw4E7uM
LrFyX+ouUQT8JSuvAZYQ31KpuNqPNwLoAEU/1iXiekUI4a09dA2I9BJiBmHx+u/R
5vlFKP/ugRkS/NVdIqd1y5e3S1wgufDie6v54d+9CMwXDvVuoSDynmvcLxX2X2da
1CYLS6TkhkazbRxSPDFKPCVRS/3o36NuXcs+L/1Rm0KfGa2k+2e0/7vI8yJ5ewe2
bjSXt25ARJnx/vvHE2mg1aIcO5VZg20ZQZ5n2tjJwODraE22R3sdvabb9/nFA6ys
4x8/kHkWM/sIHHV84L3PjKkrpSv5x7H95sD0WHLRMbIoyndI4pavit7v6iahhZUF
N6n4fJYFN6n49NwkcFhZcJOKz0tZcJOKT89NQgsrC24SOJ9lwU0Cv+cmgfPiJhUf
lii1pf+YYBW4qDh5Um4x2wdaxLeJDs8rmJ6D/bF4yEiWtqVOzJnu3bM7xt+rbesi
6SWHyTS8ODvF3aewsKAQOx6CxYctsL2ULbD95S2wRaRu8Hc18nJhQUF2fk6RtIbU
N9dL5d1J692nOitlJnYl9y9ySxl3F/lses0vyE++OqewIA2HV4G+L3Zm4IYfd82O
fvLbUts7Z0Yu+zQ+qbBgmpvFQVnpQ5OHN9LExlkYEwW9cnjWGF4IdVjIoKyZudOu
nObO91JkuAtzpufRLBZTqkaMakRBcVaeQCPHIe9eVmKflltUlJs/mYc3wOYZoxYY
tUCZS2KsgIGYibBaAYS/PDCfum7Jryb9F0fva5J29OorG58dSVxkIvWfLm2LwaSl
AXmQPq+jzy/Lfjupu5+2Wn/I6ZpNjUlTk420NiWQNFM8GWxiix2Xm1j4DJOVzDGd
TUd0Tck207nkc5ObPEc8JvZFiwNxgze4WDVHjt3yM0Ys7eR7NJx9iWJQBHNubPeB
zCbK72JAPF2mx8AZUy/kCdt7HpRpkDeMu3h6L8v3iBffqnCPUdJ+onz5+kN+D2Fm
Ezv0DFubmprY9iKshrU2sfcw908zKbuwB5tYHjCNuNzE4sF3tBkmll+EzZFlgs1a
OGi9KWG7xLeZmItPDp+bmFxQ2/niBwbwAOQnDtPhDzki/sDD9DIXP5TBuwh4ImEi
nxWPQW6pbBsJXzCGmth+ZvgfNfmeuSqCx1NiZvHgXU9UWcefsR9MHjWxH0xiwP60
WRm891MN/EXw+EvlU3ikgbm17LxJ+bcKNp9sCo8JdhYPBvJP29UTFIYPosverw6U
nM32bwOe+uw4OWBffcV/ZYOV/bQH72XBTQIPOtyk4sNChZsEjtNNAoeFCjcJHKeb
hBYWKtwkcJxuEjgsVLhJ4DjdpOLDyoKbhPZeWXCTwHG6ScWHJZIj9O+PRNrv2aZD
atsuGEy0TenQtgMGJ8mpXdqkSJt/23Zpy/YTg65t5w6poGuT0r5tm1R21hH1bd9W
OlIJ913apLbBj9japHTs1C5VPmipQ0cMnZLbdujYET7Jnbqk0PSk/cepqZ2keNqm
pHaSLBl2SunSrhNu2ia5U6UbRMs2RAu/KMMQKcPdXUoTuW85xt3KzbJPhzypXaRd
yjCRyG7b4PYTmnXaEZuqE88BOkifDTvikA01QvqRFfGtOxzojsuq71pDNsBJ/9no
QMNOBwMYcjA0p77thU8KPegQYBQdpuTKQzbgGhq+QHjnDnq/lF4PUf8n5OHfi8KQ
7GM6lNhDoslX1N1PXWUnN+cHPCCXcBEv+iYMgZAPsIbhCvwhG3xQBB2GIu1lGgzH
ehA2XEEYPp3w4ViufI++7hqZHkOwBYTFiXzcId8jzaXyPYZdD8n0GNg8QdgQDMMu
7AgHf+g7PyZsqISh1h7C9n9giPWV7I+8Y+gHf5R6WZ9h6hmfYf4rQAyBP8OggqEi
QHivydcq4r/0b1yV5xpIAn+GQeORjRuqgerPMMAqjaZW9MMdrrGEaVBpIbNlxz7D
qHWKN6fwB/hnGNQq/3RYjQMdKiB/B9D7GWYcYfH678ZGfgGEonFCY4b5HfzRGOHi
uRJpcQX6bI/Gzrd7wr5I+ZactXuV5xhpI1Pwr92yamlyz/GJ1Oyi6VanGS/2lWAO
WeVR8am9VtRgTU9fyafDECSgFhcXcGei7AXg4uIIMh0OthdA2eEbIAqfAYNaCHiP
l5sayLA+IQTuqM6m7HWi7oCs6XlZ+e5BObk5he6JVxbOyJFWqXhOs3Nm5OQVTJ8G
IwO5+e6hbdu7p+VOzJG7Iz+YPX6qU10BMQQ2n4oi5N3Rr/KFOnkJvaYS/6bQuP77
q6zuCI2BdA6F3B1xLUBbtpL+7Wuq5fXDeHUl/dvXhNEqA1f1S4ncHUzvKdUN1h2h
VmCjHEIA3h1hRIpL70Y5uPwdXIG7o+nTxe5oPGHxwpdD+WERPoNrh6LCZ2qEsrYZ
XAEIRZpo8gJtsoNcRISwyQ7JIRpRQGKfJwLJloWyNtkhHd798GxrsQg/vM0LzZ9F
8NA7a1aROycva3oRnSEU5eITDP8VqAb36j4oMPeorLjX4l6ZPGpD3cmiegCBuBQ3
3PlziRX7AUPchdhknuQe2nN4WHwlyvcVwRcqNhA6X6NHVEa+MmX/0PhCTgYXeGth
+KyBInzWAg916tNMY9w3ymf4VWQMZvQDYgg8mMHVnbC2N0++7jEZV2W++GAG9wBX
Gj7xkhYL5cEMyhWacJJeNem4YU0M+9ES/BBeM9r90JqYhg/JUUhDC8SRxT2I+Ctp
+LplH1yoOZwCV7AtjgBSxlIefwdX4MEMdv2zUB6fdqhcpQOEIo3AoVx+6tA475mB
EwiTjGe6R/Yp/z2LDVxMJKHG5r2VYwPXWEkpOzbvbcB71rfwMkceIQOMMwIN6sT6
AYQwqEMUiFqsKKxH8Ecog7oEE1tH5uBxw+UXqOEil8g590M3insIFhUa9whHPnCP
/GOQgHvQgkPcY+0aP6HGPd7jJtux9oG84B5x8CqLNXJ04bhHfJAS7qEgWILAPeJ2
y/fowBvJ90insXwPlW8q3yNNrNPjHrOUlvI9mgs+jJhAGLSKGn7gCcoN/v2LOrxh
n7rc+fAIaanBG5hAUA+PoFpA6HyFPuyLJF9QciA0vsIe9qlZA0X4rAUe9jWgmT6H
qAxQKVZzJuVl5U81hn5BATGUPfTj61h86DeMsLVUbMfCOJ93icZVOa6y1rHQBqDd
50M/DvQlI+jfR72K7euHCiJeaFc4oJhs6AdftxDCh3moULjKM/Tj7+A6IcWqfoMP
2ODu/PxUkAGistqF7wOIy1Po4cTCatfkgKHIyZSAocgFvmSrQ1nbzOWFUOQIfXig
YZMoWyCEYZPY7HOwFtUfoQyb+FoY0uHdD8QKaLEIP3HVwZ9FDHJot9p8IGu4W2iw
G7jrUbPLJanFrv4VB8YW6gMQGluJ9K9sbUFhLZs1qYKhiNBZDfYdqSyoWUXlBkJj
lZfgsMpWgtBKIDS2xBL0slb5SjDwOOkcyoSbuk3cvXq375LVyt28aGpuvju7bdsW
osFBY6gUFBCDvqHSIPmqyKHSXfRaTK8lhBnFfI5emwgzovkCYTbHtS51PMalXOJQ
6Te5ZKOZIw1/xE9+fDsdps6/mWuRPlE4N83fj4PrNMqHA00PGyrBF6GIARdqDnKB
CoUr2FAJWg69DD5UkquoBNTNk5++p0GlBgZUChWnVN/7xsVTQirivS8VH7bxUA5t
KvW9b774ABYU4r1vXHy0Aoj32lTqe98UeesK/vi9f4o8BBDvfePiNU19ry1V9T1a
I38qQLzXlpf63jcuZVrge+8blwhuJBi9IOLSOxTHVgjE5Sn0EgtDcUw2WahHFQoO
8SMQ7VCUR37AUK45Uuh0b6AcinIIHCrzFyAUsgocijoVOBRtQOBQtASBQyH9wKHo
lwKHYtQWOBSLXYFDuREC7dCEMkMTywzFsmXgUCxkBg5FWxw4FO1z4FAsvwYOxXax
wKG4AofiA2XgUIwBA4eiF9IKZcNb3r8gFFRYE+NjTKklMCnDabEvAkKYWiIKnhkO
JCM+c4QztUQ6fASPZgLQYhF+4gjen8WwppZqdityYoL2DQiNLWhQhU4t1axWzMSE
sYrGGgiN1bCmlmq2KrIE0csAobEllmCFTC3VrFZMCQaeWp5LmWhOMLUc2ju5rZtO
LaX19yQ3ZphJxhSz/IAY/pspZqjTS1zquIxLucQpphooS3GKyTUdAxyTuSYZRqeU
Wn4cXLcLvD4sPjbFhC9CEQMupIZcoELhMqaYDOp77SmTMcUUS1m815aX+t43rvJN
MVEL+RRT3n2te4pJH6S4tKeYV3hDPapQcIhXtN9FeeC3O9rvGlNMMdSYYoqhlW2K
yQayvAdBKKiwryjQJFLsbYAQJpGIgmeGA8mIzxzhTCKRDh+rc561WISfOFb3ZzGs
SaSa3YqcgqAFA0JjCzpSoZNINasVMwVhrPJWODRWw5pEqtmqyBKUfwMaIltiCVbI
JFLNasWUYOBJJIwbNKbu0D7u4hw6W5yWU+ge1Le/PJc0JpDlA8QQ3gRyOGE/VVRP
ZPReoUwk1XEYl3KVNYFE04AFGD6BFIFKMJz+5cN+tAAbTDEkzqzQcb0u9vowMxls
AglfXpUQizGB1KZS32tPiIwJpFjK4r22vNT3vnGVbwIJ8Joq10rdE8grCYvLfxII
3xneUI8qFBxe5Q31BsqhKI+Z3lCPKhR5nBUwFOVwdcBQYwIphhoTSDEUV+DQ0CaQ
LDTQN0oWihmgVigbAPPeB6GggkGmQJNPsacCQph8IgqeGQ4kIz5zhDP5RDp8jI9G
BNBiEX7iGN+fxbAmn2p2K3LqgtYPCI0t6FeFTj7VrFbM1IWxiqYcCI3VsCafarYq
sgRnyv6hsSWWYIVMPtWsVmQJokMFQmMVQkcJFk3Py8nJD68AuQGniuAKAwEgNK6Q
V16AnDOx/Gxhlh+6lPA51Vo8SF/E/HomNCIsRzy+WNnCIYB8MfRKYO/WIL3luxjS
R2IgfWh6iRyX93eTQeKS80Hjku9ipDMKaVxyvkwVmC9TheSrhswjs1/Yq2D6LBiC
apV6Wdu23iUW/caiLpuWVTg1J9t91ZScfOo/ibCVmWG01x0olxGqgcvEXOZTvQEx
8JUZyKWmZHPtp6g064C4+i4up5kkVaY3SU2OlRZ7tvSMRsNKVpBbiPKzUbyjyJd/
ItOCErZG8IW/PB+SkE1T5+kDpR75RihB31RqSQ0MV/E6kmFP5UM2IM7OlLzquxdn
wivJAcKUADGKKQCcAw4xVa1wQAwXGyikUVY4hpZlhXOJCl4+4Zi/iZwBYr6AO4mb
ME65bLWu2l4qAD7IO/KHPCAdyOksgo7CB57RHl+PDOE5U9rWHiPn2Uzj04jB5w2K
knHC8+fSUkGsnE8LzYmOGHyen5ZbEcQQQ2Oykkekw2z5GkQwJHx0/qFTc/3lirDy
xcQRekzqN9UAzZMlfFTH8ThJItp1KRDWSLWBNfOBoS9esXMOHi+on/T48gBXX1oi
18HT0h+v2FIFjxfUah5Ary8tMebgaemPV5yABo8X1CIPnA99aYkInhagL97w6hK/
9KVVOesSLv1lXjnrEqfVl5aI4GkB+uINry6BVn+ZV866BFr9ZV6Z6lKTkgXqAIJe
f6SER9LwxMYe4vioMRnsvW/v8d7KMJeZri/E1K+SOARukCZXAZHGQxfIKd0ouzfJ
7pOkFWFjABwVUxbSGUETWRDqjPsOh6yx+CirrBUQOjCf5A1t7PHeyuCCECttIIQk
CG+oDkGg5miBRdBGJQjxCxtQbQWhyjIdUr+5+LKkv97YIKkGG1QHUo3+Hu+tDJM6
vjIQkiAipxo8Axy+NeJpS/lqBBeEHnGEJIjI1Qj11KLaCiKGeXvBe41Nkmrw2aJe
QUS8jSiPaqgFwMEiUAtCvbARXo2IuCAiVyPUKyjVUBB1pUEhwM0ONJI+LcuDZGlz
DmNoUfr50rcU3zV3MbyhdzVfWFom7hLsRrSTBlHvxia63nV5on6JPRz3uIstW7pd
hBwl82UG9pL7CSsWnle4iF99HZXoIw1fqRHCOEzw8a9FZkofqANBezDM+dCC28Nk
ZiVNoo7HQWb9o+q7mMzqu5jM2oQgMywWRx6ibABWa7iZC5YTPDHuPektZT5YvRPB
5RMp+ZrJpbE3ufbYBsdfF7vO9ZytZfx9sa+7VthqxOOgeVm+meWQr4lkSglEFGr5
tvU2H4ElKNZbHlaLtJY4XEXrBWLAZssrJD7byxStSrBBBYu4JmxGKZG9qbyxNUUy
O581qTin0PvxJ1n+2MpG4yYpMhvxnAf1x2kkKXIGLSSbRjuV4Ee9B6RfwLbyhFLI
eJPF7A9FidDw1LKkSQ3PUapAaHjgms84JTKVUQVCka8+JVpuftM2MWq98xXzj7a0
qFucu81me7OoQqegRO5yyNdE3MvpS+vp+3DfpGxOjFJc+L9C/W+R3R+pf1qU4sJ/
N/VH+nDNtIdqFqW48PeXL1Oi+VGhKlHX00yJ+tIwLSXCdwwTSqCEv5kklcdQHHud
X+y+Krd4SsGVxd4PpZVRk8zkXfPBmFzXT7G/mONi+7i2x9qimsQmu56i48nUKLmk
PfpLOjWKeKQEIgrtkgZCK+kxcknfHqCkrVJJt/Mpafqk2JjV/4U8mbgJMsUybJK2
KdrI0x1RFMhq5KoCi98fSlU4Grffvs+11FnLZXNscRU7k1wNHatdlziVqmBpXp6q
YGm+j7K3nyop3KU0nqNxigv/LdTf5mBuMfWvJbjwX03dhrKLfCQJLvwDVYWF9lCr
Au85XyTaPSdiMWG2VSp7U3lj7pXRdkRucV5OsmRKm++uZ9/qbWRfChd/jJS1wIXM
iipyhewku+wDrEtdibZ/7AXWYtdh62+OG62XuD6hnLot5dd3t6Uq6jt6fMTQ0sSL
FYVqwh7aEk6bJO2oHQZ73rlUb4ug0AOGuCfm5OUVVcaW3El22zdZH3TNtp2077bO
do22/e74xTrRlWarTiVrkku2lbdkoRHBS3b0iMpcsp/aG9g+jvvG9rfdY3s6bpvt
V8cY29K4R6tVyWJkjxiwV4qVbJRUsgk+JYv3BxdIZVmOGQxb4oiSy3NAGOWpxOoP
Xp42sj1qWuyztndjf4q6M/YO2+OxUZbHY2fa7oxtXIVmL81LFhG2/nqS5orlWfor
FWahamG2h4e5fDUuw2OlQx+L9MYJ8ymycuVqyZ+7SAnLULF0jjOT6ppJWhyKItG8
qlAp+i5aMbTw1rJlpItJ+e2ClLMSXy5AyQZggQAyL8MMeIlvv+Lgq/FiVEwgCnjC
PNPcuGcgDB1T+xtsVMqUXYAK6jQVEM8Rv+f8SC73I9ImPVwrPVjHY6940pX7Eo+v
iwh4rsd7mnuYui2NnhPDVXdOTCgqwTlX6BSoVSLNxVSivoupRJSr6qkEaoOWSqjB
VYJDVIkScopkZmZK/twFUGNiKqNKQN1FLnmSYlTq77k84XBUggrqNBWQVyXke+8F
vhS/ilIJpTeLtEpscbFeYqmL9RIlrqrYS4B/LZVQ9RIlAz3sRquXaHgqhnz88ceS
P3cB1JjoyqgSaAdEleDVP9K9BBXUaSogr0rI9z4qofhVjEo8ZP/3eom2DtZLxDlY
L/GHvSr2EqgNWiqhRi+P77OoEv+UWElJSYnkz10ANcZSGVWCvaiAV6RI9xJUUKep
gLwqId/7qITiVzEqUSf23+olllpvdU60/xS1xTrZmWb/KGq1da5ztL3qqQTyipVW
tUp87lslSkZ5Rkl7PIZ5mEeGx+5VCaIxcEJKqDHWyqgSvFBEIEyMSr23g9PpVQne
y/IfPzBoD5zk5CW3ogdO060HorhKDI+OrEp85GzphEo85YxxQiW2O891Vj2VQPr4
zKRWidpcuAzen+30lt0Mj9mrEglzPX7TawA1JqoyqgTUnUckRihGpXw1ZeB0elWC
8ymqBBWU5vSaX8hGRU+vN1sbmv8tlfgpBgOnLdbtMfVdUImvYtpVwYETgO0LapVQ
w396rajECZNqeUoGaoy5MqoEIuMRiRFWZC/BIaoEFZSYIx91wCVnQ36uGJX4wKwM
nCKnEmZS6Mqzzo2/1LbEtcg6Lr6zbb1rjbVXvFtqWfwX1UWo1UGuIR4vQcSg5izc
RXX+IQxgi+oWgkV1i1R1GZIkipYU6oV05eOm9kJ6OB9GlFj9oZThrS6bbUr8+7an
XMm23vFP2La7+tiS4u+q5mUYHaAM81OKUtRlGOxjSDhlqOdjSBTJdV1h3eBqa7vN
dY/1NpfT9ojrSeuVrt+s4M2/axKhLj8urchDXYbqXbTICZ5Yjhal7ypxE//VHg7u
v1sqfzzdRhv2uwV2fUMcwuhnV0glU5a0lJK5nJbGs64dtttdbej1mO1RVz/bDNcd
Nu2SEeNTl0qgtCoeoZeMVh79S+Z2Kv82gvx9Qx6LcMnU9ZSUIK2bTNdJGtyyZ94y
KQqkO4+4Y/wFICKQvwiQcDpMF0pKSqT1Vsym8Qz3wIEDPlOKqkBzJiIQr3rkUdlo
DBgwEHkcKrEQ1mEdJp4opbPBNsegnYMBAwZ8cJjAPps4bONaFKin09MbGjQGjUFT
dWmUvhU9Le9bA1HridGgMWiqG42iRdQxtMigMWhCoFG0yEKMeZ4BA6FA0SJs7DW0
yICB8kPRIuzAMbTIgIHyQ9EibPoytMiAgfLjkKfEc71365RyiMzD3g0ibEV/tXRY
GFU4v13H7NmTrlBgI4y4zYft4Sn1DLOup95jZ2TlraBu7WRCZo4/vPT9/I88CW92
Sp6WaN407K/zLQ06N2zY+fyMBv3OHtawQ6NhrtIWVyyeNvXyLR9OumHx+DYFO6MK
Xm31XYeZ81Yt+GLdtJjZyxeTvbWGrP7fH1fPbfft+8cyxn+W9uKpsxtmH27R8JPz
u77Y8PhlHWbs6FXwQcuiI7evLex56anP9t/87sieb0f9PCa/X72Fc4dvf/yK2r/V
+zD9+W9XDrp6X+d5rj73/rVw+0MDfv2tdurJQT+2PzDy+FbPtHvbj2jZ2O65paVn
48iH8nf0v2352Cc37fji1EPfFt/umrei7Z7s1IZtH7Hf1Pyp53+Ibv/TCz/0bvXS
qud2v/rcvk05b6Zf12lkywdv7rSic16b1gkxc3++p3h93KIBt6XdfPnQX77+8/cp
lzQZeOuGgVuu+PLlHvEbv7r723fv/eSz5cc3ttqwYe6c1b+Ms9/x5sgHeqQc7Hit
Z1XK422+fHhLi7497jmnY/c2z9W9uf6oV6+auPn7v+bMP7Lj0vOts49tMx16qefQ
c5ft+LLd09d/eKOr3WMdPn3iUMJD2z5fHnf2wPzLultTVo5/tc7wrWkHuy/duPTH
9Onjf3/6+NPHf12b/vvQrQ0SPulFndO9tx4euVcKS/nttj7zPvvulb1XXd7li7Uv
nZz56M5fpn58w1u1H+9/+/ArZt0Qt+nRH/oO2dZkyozn/tzd4d5HX0xadFajwtY/
FO9P6r+mzgryyLJnP7/G1v7kyqM13976frNml9X4/r2n3lk3zvnM3Uv/PnJ526sG
JiW1a/L9wvf6HWrw1OcfNp1y16IxG/q/9MX415smPDvxrvk9H/ju43GeB7p1G/f8
xLt+mbnlpkHuBR3TH8h+eNwzbx0/uvacB+ZnbRb8bK/cu77WDVPvWraxz3NvffrY
WTPyCnOXHLXd0PGtx58v6dglOWPsA55Jrgc8ebPy5j340dy9Tdd8+cjo+HnH1l71
0B1TRvxcsObeq12nyJaHR68am5OfXUM+HMhE2OFAw68snJFLa7B7emHB9ILC4tyC
/KKubq9vwSR3+ewhEf/DgQDjcCAvSiAG/8OBCmMW2q+O6xZvkuWEw4FmSjR8T67P
4UDuijkcSCkircOB+MdPtgNcglCCYirjPcrhQJhK15F26Jm9tkoBGGjhWEn6Edao
4hKpAJ4LDvFNrfA7JQnx/X64ant9ICHsn9U4lKbMg3Gs0tZ7uxRbDVpGtbRiUBmi
9T0Yhxkqdsj5qUPf1xGDzzOLwSnFUJfUozLVdwgNxwfFxsE42tAXr/jLiuDxglp9
qAxcfWmJXAdPS3+8opYGjxfUah5Ary8tMebgaemPF7nhCB4vqNUHsgD60hIRPC1A
X7zh1SV+6UurctYlXPrLvHLWJU6rLy0RwdMC9MUbXl0Crf4yr5x1CbT6y7wy1SVm
0J5ZnVSQ4Wmw/Qr6f10antjYQzRo30YwaF9FD8ZhPKkt+8NAtYhqcB6MtiDUvxKr
toJQTQbokPoqCc9LquF/+gdUgzeI/T3yjRdV4mAcbUGoZz3hHXpRJc6D0RbEWdKT
gmorCPUvz6rBwTjagsDv8UWEVyMiLojI1QissoiohoJgB+Mgy2ATiNTBOFOjzfYZ
rjoJd0Q3tQ9z/RrPluzS442DcdRQbJQMjnnbnhS3Oa4w5ojdGnd33NiYT+3uuHVx
Vc9GCYbsdQi3UaJgja8QNMz2iJas2C4+0QXAu9psj8Ubr9XvGxVQto2SEh8uQBmS
jRJ8/tICouL5U2eOJ8x/6s6sEQQGj4evVsoIwWxPCb08pewVuLBTwu9FFxHw4lBs
lNwSs9HE7Tb0tISiEqLI1fBViW3WzHioxP3WbvFQiQ3WEfFVTyWwtl5bQyXU8Dfb
46sSWmAfXSuhSgTKtKgSgcz26FUJDrVKyJd476MSynPFqEQDs2LKJHIqYSUzouvG
o2e9P7pbPOtZu8WznrXqqIS+k59qyKMT3rDClSkiYFqCyxcjlwdiMuMxcrmKyhYj
F7hn3slatf8D+ZrJaNOFtiU1+ttnm6baCms0sd9lut42tkYcHVp6T9YqxyE7bUyk
OUshklDLN1yTRfOCnLdkI5h5D6XNEn8zCU8VvgMh9MOYIn1Oj5nMt74TP8WxJWGN
9Wh8b8fShFKrNSHJUZJQnerJO7Jpq1KifRgTPrlLWx5AICFJWjqXjjHMycuaXpST
rS5jhIsnMv2XZfyKZZ39mehz4/dbPrDfFv2366TlgP3K6G9cShmX58CtNiZL81do
Rs6lfSHcdbRNeSZaceG/n/r/7WLuB9T/tmjFhf9J6o/04R6g/ldGKy78A5Xx/KhQ
y9gitwUJp7XbAmyKMGFdr5S/mSSt8g0tLJiQNYFqc/EsaDZvBCpzcbfpNzbN3T8u
fUS/OWn/9Dvoyeu3JO27fh96Qj9fzd0/c8vYNJoGdePSaRXop7jw/4e6c2T3IE1n
hODC/zvqLpFd5CNPcOEfqLhDP1+tQWNW3O0bt/lSq7ixg6VKn6/W2TXFnpk4xnGJ
a6G9W2J7x4j41fbGiQ0cRDmrya2/kN0W4pYSiCi0CxkIrZAT5XYb32dYsSZLxSrO
Y5KkpwFD3B3aJLVp00Ztl1ApWG27hOEc0qTHtiQKMsGRm0icl7jaO/okfk4LcqAj
OfH1alWQNeSCxPclVpApAQpy9IhKV5CisTwsP7SkV0965dEri14TDdN5+mjORATi
VY88KhuNAQMGIg/DdJ4BAxUHw3SeQWPQGDS+NIbpPIPGoAmXxjCdZ9AYNOHSGKbz
DBgIF4bpPAMGwoVhOs+AgXBhmM4zYCBc/Lum8+LMzHTeSRrpJXUk03lLvhj8apta
229dc9Ycy22Xtf3RUffnQXUKSmxts+6c7/j9FueozNTRw85+7Rpz62usKdfUfHD7
5KXJX0za/faNNWyvL1703OQTy4v+Tuu+d+HkjzKiyN0u0wd7P9j76LEHCtvuffal
T5LefPSxj+o7/77ssbNSc8mGS0/c4HK32pW2u+ukyYNbm6568ayuT5Y++mjirvOv
/M7d4MXBH+54IvPosbgDY69+bcbuzSvXT0i5h+x72Z6w8J3a084b+t5Z9k8adbwg
edATmx5Y3+T370/0sLZY4vHsHvXWjKwNP6wno2fccNtbr894fWuTQz3nnUi6+/r/
LR80Nif7pd47vypYPOadOYm77pv74bbauzJKNzdvd6znkXpXby188qtPz81a3vij
OV/sz+8YfXzdOz+0GP99u4Q1y3rtmre5Z7fYnfa4OjtrXPf0vlo9XF/PO9zZtGfl
8BbNP/1jhHnGwJ7uGc02NKvx3E/dP1nUbV37y2YsM3/80Ee/rFzd/4+dx0YNscx9
aPzr713a3Z7/wRsno6Y+vTZrxqsX3Hf7ea+0WDjj9fydG5fdXLRme4flB7pf/eL0
GVv+fGv46493LTzY938j9nap27fhm1Oyt1jP7jZh20N3Xnnk+Ffnfz9lab3RExJv
vfmtJ3a88c6OMW3fXbr0o2ULj2as3tN70811jw7Z2zt7zgdNGz3XeVrq6auesaaM
fKD570vGb83YFvXGyou6P7Ji2JDHH/t4+I/J1139zM8vt27Y5bZRomU6MzEs0/03
8EAMgS3TmWU5qS3TxZFIWKbDeJj7o7h4POFYpkP7xC3TNRRoGgn3vpbpRCqA54JD
fFMrvCzLdNhIiT14GlbhSkZ5fD38LdO5pNjq05b2HK0Y1HblNCzTxUsxnEvOI249
MWhYpkuQYmhI5Xc+0WcFjsOwTBcI+uIVf8IePF5Qq626wdWXlsh18LT0xytqafB4
Qa3mAfT60hJjDp6W/niRG47g8YJabREN0JeWiOBpAfriDa8u8UtfWpWzLuHSX+aV
sy5xWn1piQieFqAv3vDqEmj1l3nlrEug1V/mlakuMYsy9VVh1dYyHaawIqqtQbZz
pCcF1VYQ+AmRgOprme48gQIIz+pUFTbI5paeFFRbQTSUnhRUW8t06mTDqxERF0Tk
asT50pOCaigIZpkOr4NNwLBMp4BLjT//F5bp/nAOdMIM105ncyfMcP3o9Dirnhku
LCI2Iv5muGrhC4yCklGeUVKjPMzDPNRmuMTNchzgvcpZpuMMhWuGi/OpNsO18l+2
TDcixh0VeTNcZ5JlOqytN9RQCTWqjWW6ilIJDrVKyJd476MSynPFqIRhmS4w1Jzp
s5xWXx6d8IYVrkwRkh0HzrMWqqNlunP/A/kalunAYTDLdHHEsExnWKYLbpkOn9wN
y3RKGZ+JlumwKeIMsUwXP3Ns2umZcentZs5J2zvzoGfAzCVpr80MxzLd6ZkrH4EF
OriwSBcvuPDfS11YoIN7kKbTTnDh/xp1YYEOLvIxQHAjY5nO2Y0Vd+NuH+zUKm7s
YDEs03kvd5U0aFZbbrcbEl6sbaVi9TdoVskt09WpwSzT/SpbpttTzSzT1ZELshHh
BYmdfia5LBiSpKfBBe6JOXl57uLCrPyiSTmFlac8DQN1FURzJiIQr3rkUdloDBgw
EHkYBuoMGKg4GAbqDBqDxqDxpTEM1Bk0Bk24NIaBOoPGoAmXxjBQZ8BAuDAM1Bkw
EC4MA3UGDIQLw0CdAQPhwjBQZxioqwQG6qKIYaDuv4EHYghsoC5KlpPaQF0iiYSB
OrYnlPmjuHg84RioiyOKgbpkgSZFuPc1UCdSATwXHOKbWuFlGairSbA1T9NAnWe0
x9fD30BdDSm2xqQJaeoTQ28Pc4MbqKspxdCMNCcttPKgjkHDQF0tKYaWpBVJIvqM
wXEYBuoCQV+84i/Zg8cLarVxN7j60hK5Dp6W/nhFLQ0eL6jVPIBeX1pizMHT0h8v
csMRPF5Qqw2jAfrSEhE8LUBfvOHVJX7pS6ty1iVc+su8ctYlTqsvLRHB0wL0xRte
XQKt/jKvnHUJtPrLvDLVJWZYprEqrNoaqGsiUADV1i4bfqMlotoKopn05EX1NVCn
/vFxeManqrBdthbSk4JqKwj8DEtEtTVQh9dEhFcjIi6IyNUIjFJEVENBMAN1WAYH
m4BhoE4Blxp/NgzUBYcoG4BZ40KdSiH+1rhqoeopqD4G6nhYuNa4OJ9qa1wrz2AD
dUlxm+OgEta4u+OgEu64dXFVTyWwtp6soRJrfNsF7zp7b9lVq4QW2DfNSqgSgTIt
qoQ6czxhvSrBoVYJ+RLvfVRCea4YlbglZqMp8ipRnQzUNZZHJ7ymwJUpQrLjwHnW
QnU0UNfsP5CvYaAOHAYzUJdIDAN1hoG64Abq8MndMFCnlPGZaKAOmyLOEAN1hIxN
O0ri0huTOWnvkIOebmRJ2kYSjoE6jHVhiA4uDNMB3IX/O9SFITq4Bz3sWxJ34b+R
ujBEBxf5wJ4T7kbGQF2MrNKQiFZxYwdLlTdQlysbqOsjG6hLrmYG6rBNDTFgsxYr
1tZSsfobqBs9wjBQV4Go6IKsJRckFZhckG2kgmRlwWAYqFMBJJyuvD+Frcw0ZyIC
8apHHpWNxoABA5GHYaDOgIGKg2GgzqAxaAwaXxrDQJ1BY9CES2MYqDNoDJpwaQwD
dQYMhAvDQJ0BA+HCMFBnwEC4MAzUGTAQLgwDdYaBukpgoM5Cq1FH6g7KKZyck32Z
dw94Ue606Xm5k3LprXfjd9HEgsKcosvycvNz3JMLs6ZPIf5W6LB5x0U8vAZWd3iw
l8lrhY7KhVmh22Rua63tjHNFy3veniCpZCQtCZu82+scAit02C3WFi9a/K3Q3cB0
m/BfhcF/73PT6P8cD3+W35awxuvH/FFcbKsWt0KnoNQj30j9uhgTS2GkR7FChzzV
kTaWRpEu8mtAV+H+AuF+JZlCWCOFBkt8A+A54hBj0QoXY9YKv1PaKYeUFN5htY77
YgADTtCUilbjjqYxN8Xj+9xIefZkSu1vfSnGZNKaliuLobTDhG7Pjn3v5c5Trrt/
4Mla8ht8T25d4flzaSduAymGFCrh1PJarvMwWwS1pRja0aFYByJYiVPoNNGIXtPN
5OC/arnOI9L6Qv2mGqAxLNcxBE9Lf7z85/xA8HhBreYB9PrSEmMOnpb+eJEbjuDx
glptMQ3Ql5aI4GkB+uINry7xS19albMu4dJf5pWzLnFafWmJCJ4WoC/e8OoSaPWX
eeWsS6DVX+aVqS4xizPcVq8y8th87g0/Xbw5Pw1RsLEHn+ABjclg7z1/R3FFy3Xq
aaQaSJ2DWZxBXppJtWQkHal2lkLY8ygTniFv9jzajGekxZ4zovCMkRZ7HmvBM+Jk
z+Oi8YyRAXu+JAbPWJxlz5fG4hmjNPY83opncB3EAk55bCLJlIGgMgXU2jdUGI6V
0Jj/XQNyKJgggvCG6hAEarIWWARqm0iYx4iotoLwVqBS5tT1PPLNodcm77pSUj82
yA+kqsQju6XcVSzpqX905A9/QQBNRUF4uK8XXtX4R2pwRIGLb/LGQ4DON60exV+G
zje9kyUFZbwZpMArvglYJdVgtE4SPKzttyQgWydPn6T3rG01S/7Y/FDL2zugGOgL
BFoBP1ByKgWeUiKbDgneWwD6qPT1VSLK/4avbFB51LJhIXpkAz9t2TDo41ofVfk5
Lf8bvrKBehiy4fCVDRoAQzYcvINRVvEYwrM+WCUMc7II1D2tuEgJVFtBtGPeXlQD
C6UsArUguAEEjvBqRMQFEbka0YF5e1ENBcEslOKV2iyIRMpC6c+ml2P3Ol921TR/
G/u88wEX+5xTw2VYKFVDMcf4g/kB6zeOF52OqJet2xxLnMfMj1k/dayvghZKY2kO
uhB8eEMPIuWcZmnt6atkISgfj5YO2Je+vuu2NP4pKIbWTouU/xOmGEYkA8+4bLR2
mckTZCQ7hMqG+qzIln0gVEPLHCPAKUUuGGVZH3VgA1RVpHgJbPKIxAgRFU+eawre
xJoNp8NcB8oFV2v1idMDaBf4VymACgXpSGmtlC2Rwo/7y9mQaUo9RJo/rZTdRenM
5eYYSzzcVfJo9n7V5OYYN1qftbAvpE+QVHMoKiFKSA1RJZLt3zh+oCpxsX2b4zWq
El3snzr2VkGVsNIcdCX+KnGRXIkUleBfR7d2feK8BR9bqUrA3hTIEuZ6pB8O8AvP
uKASUbJKmMNQCS4nQOQClFEacSgIoBJY1uQRiRGCKhyV4KkFUgkqFMlQrywo6R5+
3B/Z4P4VpxLvmrlKbDZFUiVqO75xfE9Vootjm+NVqhINHZ869lRBlUC1vID4q8QA
uRIpKmH95fDIs1959+WRTZOKu+89mRZDqZlKEHJK+h0Nv/CMCyphqQCVQK44pcgF
q91M2to4jexwMTPgJV7oIhCGqMJRCZ5aIJWgQkGOpFzJ7mn4cX9kQ/GvKJVI8qrE
qxFTCSsdbB6MY4PNOBcbbMa52GCz6qiEPqOyyfKAXQSvX6HIl/OsBS5fM2kWM8O1
2totfkDM/a4Sa934iTEbXFOsqKZeY6GZ5ZCviWRKCUQUavmGa6tslWyrbAnRtiyI
XU4m2CEvkb2pvGGVXDIWmjWpOKcwoPEytr3Kc55ivIxlULQseCAMA2Z4M7ABM65E
Z5tfjv3S3NbVg87YXqQKhBkb3DPPMnNKGVUgFPnqU6IVpjR7trme81XTRLvH/Ltj
j2m2vbn5C4egROUw+EeVyL2C3tSjE3q4abRfyDYrLvxfpf6/O5g7kfp7zIoL/z3U
H+nDnU39m5sVF/7+8g3XGut02RrrNae1rbFio59kJ7mEv5kkWU0e5bO/tjLqj5ks
ivoy5gLHvtiNUebYsxxbYt+JOjv2tH11rGJ+tTyNZGpUVWwkefk+GqB8z5HKt5FP
+dIn4t1TrdpI7S6YgXYzd1qO2vAuaoU+W9rhlnwwm6xmcjRuv32fa6mzlsvm2OIq
dia5GjpWuy5xhm54dx9lbz/VRLhLaTxH4xQX/luov83B3GLqX0tw4b+aug1lF/lI
Elz4Byr50A3v8u7xRaLdPWIDbpU2vPuJdWjsK85zrX9Zi2OXO/+O/cW2MPYG5zeU
B7dFVm+P/kJ2W4hHSiCi0C5kILRCjpUL+WHCi7UOwTTsbB+FRuM8LGdi7vTcnPzi
IljP7j2xOLl1smTBtShZ2ulsCdh4M9Vmq+tmae+8JFtpSRGhyDeb42jVgx/CrAfB
mnkn2Wl9Mnaps8j6h/XD2GLnEOsR28HYS5ydrNWpHljlerCa8HpwFoF61/GpB/RJ
VQ9Gj+B1oPwdeORLdq+VWHc73rSetja2bnKssh63dbMud9xSrUrWJpfsI4SXbF2p
ZBN8ShbvB7PI7F+meEuxyBxOt6zE6g9eni7SymKxnhP9oHWIpbn1L8tsaydLgjUx
+i6aMbO5/BMaM3shwlCXJysNYDmpK+cAu0v5Kg9WijDVepB2nHuo+2s0yy044hDj
ExHIn+NfDS8pKVFCGMTw08LAwevnG3+JcC9BDPcI/hxi+MVigIx/M1wsLw4xfDgt
VXU5s13GDMvdGDHJFSQdtSMUveK1SQuiXu2ynxNd5Bhi+cf+l2WIo5PlO3ti9GRH
VdYr5ATy5OXAJbHDzOR9bpShVxxiuEfw5xDDg9X7SIfr1SuxnAPrFWKLpF79SvXq
NqpXdRx/WXKpXp2ienVdldYrZALy5EtyXBLPyPK2GHrlhRjuEfw5xPBg9T7S4Xr1
SiznwHqF2hEpvYoiux3NbI2cGY6TjgG2k44OjtrOibb9jnMcSN1fr0S1UesUrn8H
4FLkVL0ZCzkRN2PtKnETlnctted+u6U5AZ5O0lblIuETom9IB2mJiGFXSCP0sqSl
lMxjjoa2o456zh2OPrYdjt8d3zoutT3r+DJAybCZBYO6VAKlVfEIvWTE/HP4l8wO
Kvs+miWDECzbc0SuZMyklXOHrXPcS/Yhzp9tteLutU92xtr/cc6V2PSfC4tQl4qc
lsdLEDGoSybcubDYm7G5cD2CubBFaLuTJIqWFOr5r7KCWfHz37JPJOLa1cGZ6Jjj
PMuZ4ezgyHAec1zhHORId+4NoF1iZOryC1RfKh7qMtSvXVrC8NeuDKdv6+Ybcuxf
0q45zjaOW+PczlXOEY7Jcf84XnTmOYbEfSelXn2162xSFbRLPO8LuWnZM8844Usf
zZmIQLzqkUdlozFgwEDkYZzwZcBAxcE44cugMWgMGl8a44Qvg8agCZfGOOHLoDFo
wqUxTvgyYCBcGCd8GTAQLowTvgwYCBfGCV8GDIQL3xO+lkgbKwi5l9wn+0wmbMfE
eVTXRtDAEhPTtbfpK1eYme7VJ/j9cH5RbnZOoXtiYU5WcW7+ZHdWvntMRpK7MKt4
Cn5BPIU+X1hYcOX0nOwkdjBTirs/jm+aSMnpy3J6ZeE0z9RSabcK7J2YSLqwqy+J
PlVAVpIlG57mgFtdoiRDhpDZaXkjeBRxE3ELzBQylEwl2SSPjpPvkra4lAdLPS+U
wH3Bc1CKkW+iAjLptcQT2ZPY1pM3baxkEfdf8PwT1uQYUBtYWiVp6r006mcfD79A
GVo0cNX0Ypj0K+U/2Y/RtWgrBkfTOONgGGnA3bog1aNOT/2syZQaWjRw1fRiWKQZ
j9vf4e7PhsZ4OOOoH0gDjD8/bdyZyziznOTwMg4FQRpg/PsVC85cxnd0v+3pzz9K
8DLO05F1/MxlnEFhHOkhDcb49DOdcZeXccxCkQYYf7XwjjOX8fn7V/QdcyTRyzi3
7AbG+y+ef+Yy3qT/4sb9FytVnf98DYz3mnXbmcv4sbPfntr8KVriOuGXvujhFyhD
i0aLGTFMYlzwV9NWFNaTd62somP8Z4zliDGWM8Zy6vTUz5pMqaFFA1dNL4ZFmnFj
LCczbozliDGW08ybpodfoAwtGrhqejEs0oxX+7EcW54C2+LyVFeZCqlCFO3aPdtD
nQP1syabamjRwFXTi2GRFsUkCZ9KQxowLg5p7r/vhTR1eupnTabU0KKBq6YXwyLN
eDsJx72Mi0OaxMQ709TpqZ81mVJDiwauml4MizTjjST86mVcHNK81+WHNHV66mdN
ptTQooGrphfDIs34D8uKKH//eBn3HdKUpqnTUz9rMqWGFg1cNb0YFmnGGf70Mi4O
aY63fzVNnZ76WZMpNbRo4KrpxbBIM34kF327wrg4pKHwqNNTP2sypYYWDVw1vRgW
acZlSD07GBeHNEVDHk5Tp6d+1mRKDS0auGp6MSzSjH+PoVzub94SF4c09993ME2d
nvpZkyk1tGjgqunFsEgzzrqzk2lq/0DwS1/08AuUoUWjxYwYJjEu+KtpKwpseQrl
LS5PGWO508ZYLk2dnvpZkyk1tGjgqunFsEgzbozlZMaNsRwxxnKaedP08AuUoUUD
V00vhkWacRnGWK7ajeXY8hSGM+Ly1AUyFVKFKN59550zd0hz/33AbqkOgHFxSHPz
TdY0dXrqZ02m1NCigaumF8MizXiihK+9jItDGlJdvrGCcXFI090+Ok2dnvpZkyk1
tGjgqunFsEgz/vXVtdZf+PWPXsZ9hzTVqMTFIQ2dz6Sp01M/azKlhhYNXDW9GBZp
xmnLTXHIy7jvkKYalbg4pKlWjItDmquuuipNnZ76WZMpNbRo4KrpxbBIM/7zEQlp
av9A8Etf9PALlKFFo8WMGCYxLviraSsKbHkKYzlxecoYy502xnJp6vTUz5pMqaFF
A1dNL4ZFmnEGYyxnjOWMsVyAvGl6+AXK0KKBq6YXwyLNOIMxlqt+Y7lh1mzaoI+d
kZU3grr3tiFk5vjDGWkFH3lqvdyxobVx75X705zrBg50J8UsXjCi32039WuSecuy
XYMGLTxnd53GSdmeb6YW73ugzTNtcib9eMufxP3qpUfyxh9+6fzBF5/d7KzHu564
5uXjPxz/8tjsUVMLik/U6nng20vnt7y0aLrrsrTHC+79e8lXSbNW9FizL6rDP6NL
41OW9V3z3bifC/980fLHy3ed2NUj8erzLn6o/kMfLNj94cbSQ7HTPpuxdehvZ89Z
duFdX22e1LVvzvuF/3tx5aoJjWymtF+vMZ/73eNrb71wxMEFiWMOr49//Jz9ayyr
Ei/6882FW+d/9veoTXuSDk9Y8+jhjOfe7XBV+7MvLmp7YK3140Nf3PX1N293XZEz
/Z6vL7t49brHYq872KVRgxo3XDhrWZseKQNnvROdvGx7XpPCSdfuJjtvP/Hl33es
6vxU6SeHTO5X703ccfe0IT8fnjr2ib1X/PlXh3PvyF3RJqru26kzkrYPnPHFjTel
vjT409VZd42ofSQqqtPNLffGrRj3ypwvNi0r+ejrtFqLL2584oGf+tf/36nWhXcc
f3/eta+2fua67SeGHd6+omYPV+L+b50ZfTav+3n76BmD99+c+eBrHzUcNmvVr71L
z5q9bcOsV0ftfPa9b4tu237PY0+OnnRBv+eeaP18i+7ZG6//5ud9Pfrtez7hp/U5
n7Ub+FSiM6/mVd+/Ffd8h4ef/nDi0U0Jl7wR1fR6e+yIXR8VFJZseCFxQsH0p0/t
u3LH/if27xnwpjVm0y+PNPif7b2++V8eSt/nPNRn1wvP3njddyN//6ZJvXX3d9h6
1orG3eZMyqg7q7crd2zG8bfzHyx8+54504+2WHzuoHtqtWqWdl+fWp/MOOdQP3fx
Dz+MbfjXPb0fevSHF665NqF9veTT8x695dg9D9fNuKlhUt+mt6U0Kfrpsl1171v8
zk3LHF/1WTtwyeqBbS7/NLXFtrl3bxvonrIn9boVjzSvaR0wrmmN1Cb3JXZ57O3e
mT+/de9b0zvX6jOqZ4++745taj05+LKmCe2n3ed5f9jdtvmPJNe03bfzncz3+r+d
fer8VpZJawfWmbf1W+c/Qw9eviH2utzdw194rHBI9m0ThjzTjLT8o9bsW7Y2yfr5
p893X1+68dDyA6/Pu67PNcfeufalqdHPvTDxr5uH7OixKm98fO35N177ziNfHun4
wtmZPX5Z9N3LB6/Jzn7gu9n9+oyh/zrvTVwx947rSwf2GfPMvbP+WJK77f602QlL
l3S/Z/Z9728dc9ZfUfaXem0em5OfXcNTQ/o5dTSdPGCjpveI5fyCFO+hjYX0eUTh
9NRW7uk5he4rB7on5BUUZLub58ycXpzi7pDk7tiC2EkSbZ6GUXUdiNaBsAYCh7RW
dCNRRWGFGCAjAHKpKR1KZLK0cnwdXc8VI8kpitxMUkkfOoHBz8adFhybYCbZdHgb
Jf92egW5hf7Fgbd8knODfPoDp5CTIMSd5WH+ShiwhrB5AvcXG/Nsmjp+V85R6pFv
pBJUx0Q8F3tqSb0T/HC8Qx3pAAYzGajQkEHC/UrSj7DUcYlUAM8Fh/imVvid0q/e
ERPSx1Xb64PvGjgp4yzSTYlABdrDMni8z559EntuKbaOpDNVChYD2wHRyiONxkaU
yG/IKJ0nPB9B8qShFEMn0pX24Fp5yPAEfPY8LWnQuVIM3Uh30oM8Ih2HLHW/Cp0f
1PJRAzRCTGVA/aYaoKm4PD1ZglIT6lWAIzfKwhpaZr6WArSgL17lIBk98YL6SY8v
D3D1pSVyHTwt/fEKZ9ToiBfUah5Ary8tMebgaemPF7nhCB4vqEUeOB/60hIRPC1A
X7zh1SV+6UurctYlXPrLvHLWJU6rLy0RwdMC9MUbXl0Crf4yr5x1CbT6y7wy1aUm
JQsIRhQMysiDreBekVZCo9gnC10e0FE0JoO99/wdxTUL6ZaVAwCpc1wlcZhMr2ZS
LWlE3qNjsVOUY/Z8lD4Pkp5voGFlII2HLpDTv1F2b5JcD3mStCJsjJACgWpBjiE9
RXKayIISTwEFlOERBGWNHSvdo3owmaWSSZyANPZ4b2VwQYmVOhC0BRVEEN7QsAXR
RiUI/it4jmoriE7Mm6N0nod99TkoqQMbdAdSnVyP91YGzpATccCbrj/8BQEEEUQQ
1SCiIGTKQFAJgm885/CdSTxtKV+N4IIIrUYAQQQRpEb4CEJdEzhYBOoawT9xclRb
QahnlxmekRI2SarBZpP6BRFeGwEEEUR5VEMtAA4WgVoQ3Zm3F+HViIgLInI1ogfz
9qIaCqKuNGiMoVccCyLsBFJ5EH1aPB9WfX4sIIazE0ol4DBxGeycVju51vyC/e6Y
tQkPmb+wT49ZkMCW9M51YSDlf4IuzytcxK++jkr0kYav1HzPYOX+tUI6bZ3zoQV+
tq2NNLRMcfxi6e7qY1noeNdSz5VsKXbst7R1NSZtQpBZoNPdKxaibIDmJYsIyt9E
B89swRZ/iZSlLRqjiaRHb/7wxe87eZcQnbRCY0k1MLChx0xuJn1INo30XelJGeJY
abj/+y28SreMdDHhNGq2cMshcgFKU5mLgRIZXleKFE9gk0ckRoio1NGxVWOFntv8
5D+oU0NNzyEHw1Xfey+ZTH4u9RDiSaf33CWCH0WJh7kej5Imq3pY2W7uUY4eVo4x
DkUlVBz4QFGJny1rHC9Hd3fVjH7H8UB0PdcJy0bHs9FVUSUcNAeD/FTiyCnva17w
VXXpYea1KpXA2Sj84kCNwVeScFWC+wAiFzpUAtnxV4lAVTZcleCpBYof3pRGypXs
etUB9yBT/KuSSlhpz/p7HOtZ67lYz1rPxXrWqqMSbGyhlCpygidWezzpLSU+Osqj
ExG8foUiX86zFhT5pka9YG9Je+FRUV/YY6hsMXKBaz7j5NvpP5CvmTwTNdSeGlPH
8UlUsd0V86v9cNRC+x/Re+jQso1Jlm9mOeRrIplSAhGFWr6KngeWoDh65GG1SGuJ
w3WnWZvxKA27QuITptmBVpKF9EYEnURN2vTwN5PwRHpnzXJ3dDfPmlScU+ieUFBQ
VNwiWSpqk9zCm+Tm0nMet3meImfQQvuGGDKV3k0jB0g+dVt5QilkvMli9odSyN0s
ExIejR6WmGlZkDAvOiVxpmVFwuXRdRIJaRfFCtkyRX8ht4uyTJGTiCAqupDnmVkh
z6APWoXslgqZTsZK+ZtJ0tRszIjc4rwcdbli4ibastcqV1Y6kSzXu81v2sdGLXVt
Nv9o7xhV7PrAbHacG3UJOp8Qlfdu+tJS+j7cN2kjMDZKceG/mfoXy+6P1L9jlOLC
/wPqj/Thmunk/dwoxYV/oHKdHxVquTaQlbfvaW3lxS4HEznXR3khvcFau4da851D
6vKuHHp8NG6/fZ9rqbOWy+bY4ip2JrkaOla7LqGVMZXrcXP95Z0aZWm+j5bJflp+
cJfSeI7GKS78t1B/m4O5xdS/luDCfzV1G8ou8pEkuPAPVN4L7aGW9yrCyvtFoq3H
2JNiwkbcUtmbyhvbcjPayorclCAhNt4VFRlTAazGIGuBCzlcpWap+IMXsot8EfV7
XBM64sFIEtfBKJOrnqUtFajZXP4Rj5m9EGGoC1kZgy+XvpNBjQYQtmLFVMofyK13
lkRYnMvdKB+ZhXS8HYrcy8KZLXc8Qe7QxNDljrcjJXczmWt5wX5J9FzHw5Yv7J2j
xzlesvxud0f3khoPWe4eRe4i1DLHReHxEkQMarmHOzgRS441Y+cRNGMWn24LFPkp
RSnBOye2FhxVAR2TEqs/eBlGkSmW1o6i6JmOhZbhjiHRwx2rLVMdnaIvEMtQ0B1x
rUFdflxakYe6DIPN0naVuAnTCfVaCcDVfbdU/nhaSGU2XJKAOmRItG/IrpBKpixp
uT11PSUlSOsm03VSPWnZM2+ZFAVYmkfcMf4CEBHIXwRIOF15zxGuzDRnIgLxqkce
lY3GgAEDkcehEgthHZZyRiiA+VbQzsGAAQM+OEwSLL7DNq5FgXo6Pb2hQWPQGDRV
l0bpW9HT8r41ELWeGA0ag6a60ShaRB1DiwwagyYEGkWLLMSY5xkwEAoULcKHAkOL
DBgoPxQtwi4sQ4sMGCg/FC3CHihDiwwYKD8OeUo813s36NznvXvY+xNMtqK/mjQg
bAVC/RMZ9uxJVyiwEUbcI8Y2N5V61pPC2myjXB3CbGVbZuLnewzivoygezT0EGvR
wFXTi2EY1iJTKlrN+MMBZxwpiflR580Peoi1aBgrlYdx1A8xP+q8+UEPsRYNY6Xy
MA4FEfOjzpsf9BBr0TBWKg/jaFnE/Kjz5gc9xFo0jJXKwzjSE/Ojzpsf9BBr0TBW
/nvGYaQYjGN2gzRQ8jf/b1KvQHnT9PALlKFFA1dNL4ZJuxr/9GO8IuFO3J3n4SXO
bWXzwKDp6SHWomGslM34v1HinHFx+zigzpsf9BBr0TBWKg/jGASJ+VHnzQ96iLVo
GCuVh3GM5sT8qPPmBz3EWjSMlcrDODY5i/lR580Peoi1aBgrlYdxJ9HOZ0DoIdai
YaxUHsZhyUbMjzpvftBDrEXDWKk8jLuIdj4DQg+xFg1jpfIwDnNDYn7UefODHmIt
GsZK5WEcP7IR86POmx/0EGvRMFYqD+Mw7S7mR503P+gh1qJhrFQexvHDLDE/6rz5
QQ+xFg1jpRIw/idjnKeBFJ/uY/WbpPhBJAhErEXDE1KoNBj/0+94F834Q4HzuUzH
c9Ysj9o/ENR51WRKDS0agRkvxDBpdib4q2n/bfilL3r4BcrQotFiRgz7txhn664Y
sIrrrvx8BzHVoDnQQ6xFw5grWxT/itbLjCMlMT/qvPlBD7EWDWOl8jBeLdddwXi1
XHcF49Vu3ZX8yRhHekgDAmjRYJVfz65+1mRKDS0auGp6MUxq5//0Y7wi4b6hV7GH
yCUurrsC6vTUz5pMqaFFA1dNL4ZJjPuXeIWDV/Vque4KxqvluisYr5brrmC8Wq67
gvFque4KxqvluisYr5brrmC8Wq67gvFque4KxqvluisYr5brrmC8Wq67gnGeBlKs
sXiQ3+zMDyJBIGItGp6QQqXB+J+RW3ftCWzI9aj9A0GdV02m1NCiEZjxQgyTZmeC
v5r234Zf+qKHX6AMLRotZsSwf4vxYdZjUewg9W+p+9a10kHqyy+d+tHQutvf7/h7
z0Vx319z1m+jCiyJDx16dNzhhHENBg996qI9k8ZdsmRh+/dGHZ1q/fLwq++7Zx7e
+tXr7w99/6MtM5d069Js+Qcz/risbsaQXy/44bu5c4aMtTd8d+KOrc3n//lLxk17
ruu+udHpudu2jjx8wdZRHazr0ged+8Hdc+/97vb9TRqu7f7DXZ/ftHbnqQe+nLzn
8Y8ea/RjcYeDxdu/fGJEz5fOm3HNZ/GL15/13RHHhN/O7jjtqXF7r+y2570po+9L
SSxZ+hn5JvnKKwedu3FrxlPPP2f+acrLw3LPOzTr0uee/3p68xq3NE0YPvj5r2fO
2Pb9p33uPtRo2rGa4y5+P/mz9QOPtozb//fX9Zt9/tUf57TO/vFE/05pdTa9PLPB
puGnLz/x2ublg8e/e/ynCXf/fG36XzvXPJz4041Zj2zIiq4/Z+5r8S/OKP2+11PZ
Ozstde1Zct9LrxW9dPtPZ+/e22Bc/ovH6278dvaKL2yXvrC576k62+dab3+/7570
fQ/8cM1dDQfsfz3nmuwbHjpnZt8lNR/u1DnvRH7jNx99PCr/zlWuW95M2VLXM+p/
a3O6tHW3yu5w56LaG3qOOmfHzaaMhk/cPH8dffxxzOCFuW9ddOKFGf2cN29Kavbm
xsYL1i0auaNwAn3v8kYNW2XfsK7rkppR9L2atgz6+Mkzy+rS9+7v9z87jeT2/a+X
rFv0Se+eo+jjlUnNYih50xqU+H9rJ8ppFrVudbjTc5Of/+WK4vrvHr/wn8MdLvtm
xufjr/+m8/NvIB9LtKIoPJLzyMlvN/bK/9+TNO+PNulEPceGlQ0f1pfNzsh9+Zmt
mQOGZyzZfrjbE1vzXr53x7K52/pNTH7xoevOTV0943Rmw7V3vtRoToOLir+/4OvS
TYNe7fNDjdZfWtfvqH3rh6++Mfy8V3veem/0lbc+tuHua5ck37W161cLkm6s+8nI
vl+vejJlUNfutbv1urrFBb/81nhmxrZZJ25f+8gnG29ffH6L7Q8+c8PBeh+m70/Z
mfvzwYkljUadN+fLVTe1vOK+gbGXXHDb5U8VtWh/dZ0PLlvzcdfL0t49sGTMG6lZ
S154uvYNGW8u/G7s/NT7Xkjt0uWvURs33H+0SYdjOatW7K6bs2rCt0tubvpO6qQp
b2f/+uAbLWeuf9tycPmJ307tn72ya/Odva7uF39wefLWy2oOGRK9fVDB2gfPrnHJ
nQXj/zrvsgsemtpp2fgjjssv652782fPw6bF18/+7bXRP6x84/aVf79+52/FY1YM
/OHRv0bdUPvUV6Prji7d2apbzYOP79t8cNCmHot/S005ZVqSOu5r8Vz3GGIjF1O3
T1Fx7rSs4tyCfPfQvILiru6R+dOzcmGaudhdnFNU7C6Y5C7P2e/E/7x3gK/7KT7V
FxADP+8dcmHnva+IXWgf7OwWHyvJKZYcJalkJoG5UZz3biLn07tsEis9A/7nvc+X
LbX6nMQuId+Dv1iCVJ/3jk8P3F8cZZR93rs6JkLGe46UZJsYPwhBFVNVLYG6+oDL
iJdNIEB2HLiNJdFkBHVRJuqv4z+TbibFsDB/kf+qRfx1S3UGZBQIR2F13ytBA2WD
S9JXamWI1wAJJDVDO8sGl5rSxsGD1zV1W1fdwaXlp4ul8zxKvROlh21k/N6A0rf6
a6tY7wxoQ1tqhnaWDf82DhITtRSAX+/cSXSmlZM/Mcc9Iaf4qpycfPe0HDr9kkmq
BcQ2TtbW0r9XD/l79YlrhDaO1zlQvbb0lp783gAheXVfm1Z3+MUabZxY7wxoQ1tq
RhtXNrjUot04fkOpY8o6gsWN+W0k5HjEU0vadYRUsau4jnT4VBQZJtAMF+6RD46V
ZAphuUJJi28AfHWEQ4xFK1yMWSv8TumrqjjawFXb64uv7PjgjOezSDcejR+OpjHX
6uHPCeRpafWtsRRjGvGQdDkGfrIuP2yavSGDjhv5LY+hiRRDT9KL9JZjeHr4+ouz
Z7UqfezkFxvW2yd61K0yf+YxNJVi6EP6kgvJIzQWtv2RHZajDbWc1ABNZYzpSelo
ebFF1T5EpiysIW4SXC/0xYudWBzB4wX1kx5fHuDqS0vkOnha+uMVTuzRES+o1TyA
Xl9aYszB09IfL3LDETxeUIs8cD70pSUieFqAvnjDq0v80pdW5axLuPSXeeWsS5xW
X1oigqcF6Is3vLoEWv1lXjnrEmj1l3llqktNShYQjCgYlJHH7FrrL/z66uy0EhoF
6/cZ10z+bcgk5kWUdxTX7E23VtBVeaTOcZXEYTK9fiGNFG+PHxdpPPQfiQuxTjST
6lc3MsU0jJyismLPq01TTMOFZ2fUFNMI6fkGMSV/eFNaIPN0o+zeJLk9yZOkFWGj
jRQUjRbweY2KLD1Fcn+VRIcPaxI8rEhlCUsQzZ4hLHChc0r/cE86/gavBIA+Kn1V
UET532giV0ePyj/D68Gq41jpXqmOqUJ1bOzx3srg1VGsJoGgXR2DVBJvqHYl8ZS/
knBBSKUooNoKoqf05EXpPA+72Sc1OmU3UP4b4nAqKIP6nFF/+AsCaCqxypeb/QRa
RgMVRIRBGhyzKEKZ0g++IlwlNzjKd2eI2SJNjk5KImfNiFnyBxShcHZR9pySU3mJ
iKeUVPEGR/qIIkDRM6C8esarl1+10IB29QpSSYLoGQldz3pLTwqqrSD6+K1OS8Fl
Njh8HKw0ODwOcUQUDNqCYA0OX/v1E2hlbHB4Zo0GRwGvXn1V/uHpWXgdOxCkkkRO
zy6UnhRUQ0HUlaaR8MUCMcDOP5ebk9NwGUOL0tn52uKEmz3xcHY+ugSsNMtgJ4zb
yfJos70wbnrNV6Kb2gfHDayJTYrDnenx+Bzif8I48gofuIhffR2V6CMNLjX+LJ4A
z/1rkYo/+5vJzEZ+jY1ytLRlxtexNnPE2LrFn4qNd5xrGxHfmDb55ZcZtoZGHqJs
gOYliwhql4kMI2wzp4KbNNot6WPCO+nejwpOWqG5gmjDRmuXmdaImSSbpjDFJLW2
3k2SVhruvxDQwhvnMtKFvlGPCPNiUuLDBShNkloFgkTmmwhe8mVWAaJSEmPA27h4
wuh8oFzgQ22LHFDTc8jBcNX33ksmk59LPUTq0ErglkKRmcs6OXbPXCVNztl4T3NP
G68o23rvQlEJFQc+UFRirC3XsdieGT/Hdpsj394tfpLtSscCe1VUiXiag+F+KuE+
5fMogX9nkx5mXqtSCfEcMA6oRFQFqATrLoCSilEJ/2QZ/g2VoAJS3/uohOJXtVTi
Vftnzr8dmfHf2084P3V0i3/P/q3ziKMqqkQCzcEIgoEU+wkBw+Z/vLde+H049lEJ
HIcnugBqjMVHJSyCStjoP6Wyc2iphLL7PiSVQCIQMwNeUrLtCy2VwNu4eMJcDeBq
qYSankMOPk0FpL73UQnFT60SAJ79VUJJ879SCSsdbNaNnywNNrvF95IGm93iB0uD
zaqjEmy4rZQqcoInVns86S0lPtLkATtvWOHKFJ5Q5Mt51oIi33tjzPbtsZnxL8U0
tT9MZYvBPFzzGSffnv+JfFs6MVnKpHUWkyXUXUyWzkT59vkP5GsmbuuFtg8d/e29
rVNtTzqa2C+xXm+7xxFHRxdtTLJ8m5dDvibSnKUQSajlq7SjTIIiuATECSsPq0Va
SxzOO83a5Ntp2BUSnzhdDGhVAnsN5xMsocajn5ORJM3rVb/FSyZuggRZZkzSOoKN
PN0RYkY27OQ7C5bvWBYttPeNIVPp3TR65dOrVUjFjDdZ/P5QirmzrXPNTfbmtS6x
XVLzTrulVrGtuOYs+6GahKRGlb+YU6OqYjF3trBiPpv+0SpmbOszYaBRwt9MkoYd
Y0bkFuflqEsXq0U2si8leOkeiHjpdo1p5mwZuzpufMwAZ0xsSdyMmInOIzFT4kIv
3a6U8dX0fbjNKKstYxUX/uMhJtkdQP1jYhUX/jOoP9KHO5H6HxFc+Acq3flRoZbu
QFmJE05rKzG2XGqVbkalL91WcX3t9V3z44fEXW4/TrvCyXHz7F/F9cMQLsQmuj5t
mvrSJh7ufBpPqzjFhf9x6l4uu5nUf4jgwv8r6s6TXeRjsuDCP1DpLrSHWrpWEytd
t0lbd7Ed1oQSKOFvJknlEejHHqGXd6Tbahe5OrZu/Kt0SImhOq4FsY3jn4sdQeVr
Npd/yGPmc4+IQl3eyiRnOelM2PQNlhHQJwZa+QCUOSWLc7kbJSOzkI63Q5F7WTiz
5Y7pJ+SO4UrocsfbhtxFBJM7cgq5o0XzX01RULbc8XbFy72up6QEKdxkuk4yddGS
sJ09efTKotfEZVKEmKHMI+4Yf2ZFBPIXARJOh7VZLEZ9/PHHJDMzU3qGe+DAAZ/1
26pAcyYiEK965FHZaAwYMBB5HCqxENZpKWe0AxiiB+0cDBgw4IPDJMGiDGgBrkWB
ejo9vaFBY9AYNFWXRulb0dPyvjUQtZ4YDRqDprrRKFpEHUOLDBqDJgQaRYssxJjn
GTAQChQtwg5HQ4sMGCg/FC3CR2ZDiwwYKD8ULcLnakOLDBgoPw55SjzXe7eC3Oe9
e9j782B2rSYNCFuBUP9WhT170hUKbBER97SwLSOlnmHWt8zstKkXqPtUQ+m0qaWD
Cj5qU3f71rjOA7cMdNbdv7+09hUxLb5ZvL6459g+fZqZHms+aMt77Qe03D4h+bE5
sT3IBUcHbW40uPuxi5vPODz/xtf7D3BcGrtiY5Mrjp1I++P0rBWdL/12ef1Leluv
vaZk6JO3xo7+869j36/4otkzE4f/6Lr8nwUxp7e+nvZn6eldbWe9/Mr709qMz3j/
DsfFBYNuGT+k97jNEzPW/9zumysnrvnn0kWXZCU/fDSu/w0P/LPr8yc/O+dEycNL
ruw3r/TWeTc1bWTeUvLdkKgbt5Xkn5U++Ocr6t0b9+lDr7e2d0yxf1pU77X2Sd9k
P92rxi0PP3l7z8n105+qe+TZRrZ6Xe8kj3ZP37mx9qK3+60f88zCvg+/cEt04e7M
nDc2jKyVd9EzU7pf2ji5dGOfdv/EPjLwmaUT7su46NnScf3qbbrwiy/vzNn00vKh
BT/P7Da4qFHTlc2/+fmuhB+Ob32s36cfvNj5+2Yd3xrxdeel++ISW960q9Wrt9+f
aLtv0h0nV03IOb7rwssbfPpM3ZfXvdmndF2Lye9dv+mybx98fsUn4zd+NeGO/fdu
HX5n6ujrtjS/68a1H/58/j2PXN772oHj8hIyV3z91g0d37Aeevcey/pjPUZOyXrw
tT2bHzPt2BO/4aoOed0651/499N7/rqlcMSU0iE70gfdNa0gaW9363tfj3875Yvu
rvxfb/2soPf1XeOev/fzFtf8s25tm0vv3PzWhrUpT/a99uDBEb//drDx7sJjx0Y2
btHa/lfPXQN39O9U/+YJFz386swW7Wf1Pjl/0tvH3ntqYMYtDZe0HT5p9P0vXHDb
u0u7DMhp/H6jj5o+Oiiz9OU9TR977MHvc2vedF/HttMWjz79/J7szg3e+6hpwrjl
HTNOtWpleX/kA3WPL5x9etPsW6/ZPT/9ttlvdv92xRUFPY5vo/mznlo/e/KLU6dP
v/WyLQsHu6yOoz1uLnrq+LWNv9hyl6Vf/u0v3Lv+sys3JmZ2P9jvlwev6H7fe09+
t/zj7F30358NJnUuOhnVYdWBt8UzlGKpCvShbvqMnMKsyTnuGbnFuXm5kwvcRRML
CnPcE2YpBybJRyU1n1gwbUJufk62O2fm9GJ3hyR3xxbuSbn5WXnE/9wk7EPCNkI9
+5aqATwQAz83CXJh5yYVxlzszLSlxVtlOS0y4dwi1nZhg1oSbZGypXfYq/7nJiny
5d8wOWZ5lHslbI3iSeCP4uLxlH1uEoNvKrWkXKI6nUXYjxXrSL/BMZPRAtU44X4l
6UfYG7hEKoDnhEN8Uyv8Tm/6vM2v7fWBix3w5bMcTMgRqRNoKcXWj1xEBvhYL/4g
beeRb9euXVvD4/WSUEt4ZjG0kmLoTwaSQZr2j31tf/g+/y79qrOZFMNgMoQMJYqd
Xz1Yuev8Q6fm+ssLYeWLiSP0mNRvqgEaw/YwQ/C09McLKzIcweMFtZoH0OtLS4w5
eFr640VuOILHC2q1zVtAX1oigqcF6Is3vLrEL31pVc66hEt/mVfOusRp9aUlInha
gL54w6tLoNVf5pWzLoFWf5lXprrELIBh9COgdJ7n/vuAg2l4ZCMH8ecKjWn/z6FY
2uNQLO0FB1Ln0G0BLIi9PB8LYDKlH7BcTKEyhXaRQiBBMPZKL2vsWOn+3zGFlkyC
CsIbqkMQqDlaYD9QUduEGyA9Kai2gugvPSmo5RlS/8DG6wbP1qEa3By3AsXqLcOB
04HV2V8QQBBBVIRqyFAJYqBvaJhWAquwWdJB0pOCaisIpaIzZHhGStgkVXs2W9Qv
iPDaCCCIIMqjGmoBcLAI1IIYwry9CK9GRFwQkasRQ6UnBdVQEMySKPoDPhyLlCXR
ddFfOZraScIH0VFOs/3zeLZs1zvesCSqhmIjblTMEmeSba7r6pgXnVbbONeEmFVO
t63IVfVsxGERcRzhZhOlvzRLf57+zm9RcWOd+AE9s/5Km9TpmZu/OJ7guZng0xKX
lbjBjwO8R9FSYDbiUDPMJN07xIHZRH9o2YjjcsOgEfd8YRUftgKVFQOYVQ2M8BIu
Lg4OHs5/aJ3DPWRwOp5/uFoMcHgFI69Wyiin2URcHlyl7BW4/jbimIsIWDGKNuJu
M19jZoYzEsnhkFQC9+q1bA5RJUZRlbgw/uqYq6lKnB8/IWYCVYkLqqDZRDS4ozVU
ooGfSrC3lFVzK23jUbcYsPdVdAHUmBiyyPQ/SSXGmENVCWVdusSHC6YSZa1aB1CJ
GHirgDBExVXiHP6CDE7HMx1MJTjUKkEF5FUJ+d5HJRQ/H5UQ1ECPSuQKKnGpiavE
K6ZQVUJ8FqGYnVsXXT+e9axp8axnTYtnPWvVUQl9Zuf6yaMTXvmVljmSZueui3kh
fphtbsIjMV/Ep9jGJWyN+T2+jq1XgmDTKLMc8jWRTCmBiEIt33Dtka2XrYasIto2
jfCpz0Rqo52QkYQnMph//56UU1iYk82+gidLhW2Si9EkK7TnvLJMGYVruorF7A9F
jQ7TAeoDMRPjE2OinFdRFcIAFe6ZZ72xfxmVIBT56lOjftH5TldM9/i86MXOH6Pr
xc+PXuvcGW0STYOVU4360V6jO30fbj7tTl0xigv/POpfT3YXU/8fBRf+86mL9OGu
pf47BRf+/vIN1/DbeNnw292ntQ2/4Xu3CfsASvibSdKugAAbTCqjIplJV8ti+1LH
3Y7xlufsxY7pjhmW9+yXOMY4BAt/Hv0FnRpFPFICEYV2QQOhFfShU2Wb6UySCrqR
T0HTJ9I7a5a7oztrUnFOobfdbD2iMHdU1kz3hIKComK32hqci6DM9VjuDLfkg1mD
M5MNLodzVfy2uE9drZ1z4u+PO+K60Dkpfl6cUvKWclj/S42yNF9F1dBBVRLuNhrP
Bpfiwn8O9W8tu/dT/09digv/SdT/QtlFPo64FBf+gUo+dOt/q+Se8kWi3VNiQ4oJ
Y91S2ZvKGyPfjLayccemBAmxsbW/sb8YKWuBCznyJv8Gx9SPX0L7SQwzcY2NaRZ/
S8xoKuCqawIN0h5JfL9JqoHceqdQhMXpawIN96HIvSwoyhVtn+Fc67gzroX9fucC
x7S4dPsGZ75jJFZW+PhEaFZFqGUul7DHSxAxqOUebrMqlhxTp+bS4lAtn4YUMQ9L
dXd3t0lJbRc3Xbpp06Zzl2RpZ15UwO6SfdyIlWWE9NiUNEVe2IyqgIZUSc0fSlm/
aFsV1yNuUPyXtjfjzo5rEf+H7cs4c1yiNCapvmXdQiqhnj5lTZ9Ir4K8gsIid25+
du7ErOIcd1y2bEm1GLtscwpzp9Hbori4XrmFE/Nyimh9GD0iyV10xZVZhdLTgCHB
B1L/Vg0QDR4iNy2xHANaw8RhMJozEYF41SOPykZjwICByMMwcWjAQMXBMHFo0Bg0
Bo0vjWHi8P/sXQdAFEcXnoOj33GAqNgiKmLDAraoKItRo4k9BkWjooIVUbGX6MXe
Yy+xxhZ77zFKYi+xxJbEFmPsXWP7LfzzdnZu5/b2uJNyEXa/BGdn5u28+d7M252Z
3dtRZVSZtMqonzhUZVSZtMqonzhUoSKtUD9xqEJFWqF+4lCFirRC/cShChVphX2f
OEQoPT5xuBY5FSYvkMELfK8gsZ8GxWnE9zWoduk7GtK4WYJFpgA5GaJGvnAI+XcK
+xHKcrLpBpU4gUpcok8alyUlhZwMUSNfOIQqcSEulU03vLQk3r69a6RUnzQuS0oK
ORmiRr5wCHniL80/xsjKphX8jzGPBXJabFz4mSr9JSMSviNgqe+deZQVsBQmkJMh
VFImDpUyl30nW35aQInDgFTQryzizOvsyiIOgyBBv7KIwyhR0K8s4vDNE0G/sojD
+F3Qryzi8DMSQb+yiMPv5wT9yiCOXlqO3LZ1ncPRulBI47KkpJCTIWrkC4cwo0du
F7Z2xf9n42iLw085BB2yLW78L1vcmAEtTonDN88F/coiDj8eEvQri3g2pFDi8IMz
Qb+yiMNHNwT9yiCOOKKD4sNYgREqJSebXnAVWjwnMum3aHFSCwe2OFTKXDb9W5wS
h59eCvqVRZx+rA4pjTj8SFfQryzieZBCicNTN0G/sojDR/AE/coi/hFSKPH8SGHE
FT9yK4BM+mVb3PhftrgxA1qcEi+IFEq8EFIo8SCkUOKFkcKIN3bf5Uy2el2Nw2/b
81u9zquXkC00YOSlHM0CG5aYnpzfo0LIdtR4X3Cn2iPOcDUmGb+sXGfZ/c2nZ3cO
m6b1+Ll8s8DeP9f7vafzxKTs7u/CIraXvfJ7p0a/cZdrny33UcTWp//bkG3plBYR
my8+rT762xbVm7y493Pcq9enDwzY8fDf5tcD17t+Gf19qSGlDuU5+nn1aQOPD+zv
G7f0TZGqJ6Z9sfjbGmdudf6t4+nLpaZX/zF/n0HnDVOW5fznfs+2/wac67quxaXE
8J3HO34xO9jXOOs8+rtE+d71ojqvPtt5zbOkyr8Xm/7nwAutZnbt+nHescMXafZN
O32pe3iVPTc+Glf0j5o7b7htXbR761c7wpJKnJl+d9S6ud1/uFql1aHVD/OfePJ1
o1czt8/9s+nRiH3XDdMSj8w8kHR9cNT1BTkXv9pduuPuYiMaOW15u77JymaR+x82
fbOwi9u9QacKeTx2Pc1dCOvZt1/C0R4tCw2c0+5gngdVXe+/nN+hb/WmR9r/063H
mwt/Peq1JJ92d/9jFXMlrp67fbxhdZnNzicOJbb91/V11ysT9jUrWz6pXuMzXOSV
PZ4VixzyjN4SUsQ1dsTqYL+N1aMOrWxXKTSwRGz5yZOy42i+o2M00QVWjRm+Gkfv
NKuvw+L1/rl49LMXOxJr68bgMw8EFX63ZHIAli0pJxuEC5705cHEtnOnr+61oMSo
fZOaHU1sW7dx20tNW2KxztESMS7qUOeCBUrgaOUZ2Zxxqdk8onH07Ia5AVj8u0M7
Zk5/0PP6pAC/LtH1x9f5bPXrcTmxbHNZ2VfTyg+ccPf0z71m1uhVJl/vmWs+bVn6
6JMbU+88fb527rk3lfr9uMq3WufgUj+Uf9y9QPNsfWsOim/972dzriZtqTe0Zrtv
i3TRnv9Ht7/j1dgVo1x+i42LvBS7IiRuXlz56E3XLk3638HlCYX9HxRd9fnp+g1c
GkxudaR+1aoeraY1aLXn+7OnVrZwq1PvyOMW8W3+N3b5b/3mJP45YMBXcfvu7D3R
wr9Ru/hxnUY1/Xbxn1+XHFGrQ9S7bzxvvrp1q8uRryKO31rWbH9Ym4mbJmcfUWli
rsOthscNjVvU5+NTcRt37Oj/Xdyitps21V2W3Gr10OQzYbPH/PvuxtTxf94etOyH
oUXqGR78/NOiU4FVlzRFYbe/XjBgQPF+v/17vNeVqX+NHfTklyEvfvNoOXDv7evV
Fj6vOS3464dl7wSuuLi49M7KA0tudTtbZOKS5LZJU2//3v7OF2eTN1ebdHnM6aPb
X+Y5N3zvMnZ3W/hMOCw1RJl9dLRnYMPQcoFdO7WLQ9Z3rDUf2CkXcP213LF2kKaB
R1XvqgYP3l4a1AaF4fQc+D/yvcdKCHashW+dhcKJWssda0cIn32jX4+H9LDJHy2f
27IZR+PC2TyWCyFNZx+1pbxjLVsS0VCb8+dfhYEcWJfIwb/w6ozaCqcB2jHHsczx
QtQRkddn4VVa9gwArREFW4pcPluyXP5k/lEfaCIsyF92UyqsnMIiInRyud1lgzgS
0o2xKjDxn/lPRVbkS2yOvkItzUr4a09QtpoVrub0Fc6gH/sMMMV16AE/3fiYL6EF
aoVay9bBfE8a8/h63uvK8iXE4F7UFqXfbrJiSSl9E1N6phQgk351Une4JbCty/5y
4U0fCtvlgrSUA8jbp4st2bYu+8tle6jtckFaurMqwD5dLGzrAthXbtr6Ev2zT9eH
2Zfgz/42/zD7EpW1TxcL27oA9pWbtr4Esva3+YfZl0DW/jb/kPoS2ZmuuZAmjjyW
DZzZq8fsgRFQxM9CweLOdGWYnenoOWLI7nCbw3QkD9BOIe5nWoTvJWXwGKMNn0Pi
v/BxqAGJf6mBOOgi8Zt8HEZaJN7fCeJQJol7OUMcRgYkPo+Pw4v1gj4txOF9c0Ef
H4exJ4k3cYE4vJ1M4jf4OByReD9XiIOVBH1uEAfjCfr4OLz5SOKl3SEO43QS/5mP
w0eXSfwLD4jD6FHQx8dhXC7o84Q4+cg7xD29IA7v4JD4XD4Or6aQeCkdxOGNDRs7
/6XHXpDSnf9IR/uKj4kQh5dGXLKCNs5tycdEKNYQLfgYYqYsx38rNjfnjN785YRM
WqxdehAnhEk0FHcQln4C3BKWhgAEs4bgaKoJJtd4wzs2a3AbJnwfpxIkLWBuwkW8
KeD6xYMjdwftJKjWW97k5OekTnw6QDQKJQZtTyWpFAViNiGzfT8B2Cdl392Mxfuf
QbtXK0m6+fz2ffdczcTbEbfmYyIUa4gYPibCfF9mssZhvyHSduUF2DDE+1w2pAag
kDdEGz4mIm09IsMNkXE9oi0fE6FAQ5B9meEmwO/vgjJuX2Yj2u9eyRDoswTdds9u
eGMgi9PVDeq+zFKIWwUaUS4DsVlVA7FZVQOxWWbbKlDsNVATtteQrQKbC/0OJnEA
upiOMnTHzQIuvxtmeh7yqenyxtDTc4lPSxd/nxae43Ejp3arQF5BhkJq37Ruf/Ob
sP3NASS/jxg8etDAAxijkIztDY9jarTp3zMwLr5N955xsYE9OyW0izNtJCfdOo5c
YsS9xazvKpaW/W7gTFu7irmjHfgytFTTxnAJX4a+we4ElyEIM9/um7ZcqsV/4lJ6
dNnzLdqgD0VOXn+gCfo6KLfXz6i3PvUuBTemDXpyg7qMab5lQkiHZ4YThNAJ36z/
YEJIr4ND0A9hbpz+MxNCuqV907r7Jifsvtk4WX5TRngWx2+oaKRnhvCrQeYPwD9c
L3JCuVw83Rd46jyqupRyH+h5y/1Ll1ru7TxPujOt/B4bMOJWLko0ZCTkWxmQulYe
KrSyta03K/GtHCAuUmB7Q3tYe81B2t7QI9QNNzPPhpvwfDwTb7ipQ8n6II+7vk88
CnnX9jjoe9wjjyHGY53vVjw5CNRabgZoq5EDtYjjFWQo5BsZkLpGzik0cg1Em7Uc
jmvghmuksiH87bdxXLtO3TvBhn+B3doH1mjXq2TpkoHt4uLje5bkz9YKN17LTf6I
a5PpohO/rE+GHXRDSKg33RDSsh/cTGM/sL4loNgPTnvs953tWcj7hcf3vr098xgM
nmN8W3oqqR8ECP2gFqL9oDwC985h1g/gIZd5P2jahPYB6CMpbfT4X7TsK+8Bns99
Oa98hvmep33zemX32er5o6/WS0ktm0to2dqItmwFvmV9zFoWzq/fjW9LZlpjq03J
+gfdvPPzNLRnypt3kvb0QGM0PT1Le9fwXqOZ6enlHeg9XTMEe+3H3kGZaDJT1DgJ
wXVXg9oieM0Q2oKvOa7SieR8tElNyFv9xuMNS66YXnxzxXdUF77+rzWuZpIQhz8P
bEkn1Abzi8WpfXSwRCYW64H/s1CCipl62VxUSSP+FJZIGs1YkDt6Si+e8WLUzAQg
DjRpQdICocFYwJn0i2gAWLKDOR+E0o+JAqTyFJCHjQIhbQL+GNJouiAmyCRxiH8W
tBDCJJhfkjh5PkTSSCjqdDK9w1mUI+7WWnfKibhuGzRQkxqXYBlIwbrEeK/S3jWx
S6z38vIugF1illch70qZ0CUCcA3a8c5g7hJ5xU5khr/21M69//q/X7hil4BhJoj5
DOGQ0Wjk8yGEOPyBS2gFl3DKIJeA/bKtw4pL0EZnQSUz0iWwUZKxgUwuAceQBn/C
KWDAdHaJWQ5yiTPYJcpjl3iJXcIXu8Rf2CWKZUKXyIVrAC+sS12CvvouotzDN7P7
D/1zz415EWUbNHTGLuFk6uLv+D1uACSEH0a9413CNcNdglhbHlZcAm5qtCC2QCgq
I10CfoqLDWRyCXIMP+Tif8zFiwn56egSlTLUJdRdz1MtkxVhjas99vjQZFSoUJHx
UHc9V6Ei/aDueq7KqDKqjLmMuuu5KqPKpFVG3fVclVFl0iqj7nquQkVaoe56rkJF
WqHueq5CRVqh7nquQkVaYb7r+Qz+xQoNmolm8yFCHRB5Y6IVzojBCbecyR8F+F5l
/PdJt4SenWLjEgPbJca16dUpoUNgm4TAZtEhgYltenXEyb064vinid16d4+LDQns
kNime8dSgXW6do/v1A6L45PFIq0iGSoFmMW/8gvvnmhQpPAqLyAEwYsqaa5KSf4T
l06md4TFX3mQt3mdUXkkvLQivG3ljAIR++5wR9QQdUGxKB6Pk6fyr7i8D2ZxO4wQ
7uBu8yWy7xvF4L8ZXEbvTt8lB/ngJfzxu9O/hDd7CaA3mJ7ySN6lkcYt3uph8yjk
ZCCUyrN5/Iu6LzNuG0ATBOJAGHRA+OuxY9Wk+qRxWVJSyMlAKJVn8zKa+HezAX9E
UOLQP0AHEP9udq4IqT5pXJaUFHIyEErl2byMJl6WxzUTcXAQ0EFavG6EVJ80LktK
CjkZCKXybF5GEyctfttEnOoB4mXLboqQ6pPGZUlJIScDoVSezcto4u15PDcRB32g
g1zcjBFSfdK4LCkp5GQglMqzeRlNnOCRiTh9OZX4+OwIqT5pXJaUFHIyEErl2byM
Jk58/KmJOH1rVriqR0j1SeOypKSQk4FQKs/mZTRx4uOvTMTpO+KK83EYBIEOxbU4
jBJBh+KIw5efQAcQb9/+RoRUnzQuS0oKORkIpfJsXkYTx62K8cZEHGYtoIO0uI6T
6pPGZUlJIScDoVSezcto4qTFNRwlDp8DAR2KIw6/SAcdwuws6xIXYCIOXyoDHYoj
DqsDoEOYnWVd4mTk5mwiTnenV9xVne5Or7gWp7vTkxYPzrrESYtrTcTh+wigQ3HE
6e70yvFxO2Ghn02wyBQgJyNHhs3jiTPpUtn0wlqUmJ0sNsPHWNQFZ6QuONMbXIRU
nzQuS0oKORkIpfJsXkYTVxecBeJUDxBX1GIU6AMd5OKmLjibII3LkpJCTgZCqTyb
l9HE1QVngbi64IwU1uLqgjNSyrRFIK4uOCOFEVcXnIV0qT5pXJaUFHIyEErl2TxH
E1cXnJHCrurqgjNS2LqruuCMFOLj5EVf+D4f+6JvO0EKtAo3OAt20rgsTSnkZCCU
yrN5GW0KEwTiQBh0EOJchFSfNC5LSgo5GQil8myeY4jf4q/zQNwJscRRhFSfNC5L
Sgo5GQil8myeY4j/ZSLOrrsiJRGnehRHHPSBDsURZ9ddkZKIs+uuq1auzLpP08hu
qGdNxNl1V6SURwxAnF13RUrq6uy6q6JanF13VRRxdt1VUcTZdVdFETdfd10YIdUn
jcuSkkJOBkKpPJvnGOL/moibr7sqiDi77qqors6uuyKUFCHVJ43LkpJCTgZCqTyb
5xjiL03E2XVXRXV1dt1VUSsw7LqrolqcXXdVho/bCQv9bIJFpgA5GTkybB5PnEmX
yqYXyIu+sODMvugLfQAAWoX5mgU7aVyWphRyMhBK5dk8x/QBZCIOhEGH4i536oIz
yYiQ6pPGZUlJIScDoVSezXM0capHccRBH+hQHHF1wRmpC86ydZNNsMgUICcDoVSe
zcto4gTqgrO64Kw44uqCM5+uIOLqgjOfriDi6oIzn66ExSiBuLrgzKdzEVJ90rgs
KSnkZCCUyrN5jiGuLjgrb8GZvOgLO5uzL/rGCvmgVZi2WLCTxmVpSiEnA6FUns1z
jCmQiTgQBh2KI67IdVcg7owUSpzqURxx0Ac6FEdcsu5qwUUalyUlhZwMhFJ5Ns8x
xJHp4sauuypm2gLEzdddFTCkocQVue4KxBW57grEFbnuCsQVue4KxBW57grEzddd
FUTcfN1VQcQVue4KxM3XXRVE3HzdVUHEzdddFUTcfN1VQcTN112VQNxOWOhnEywy
BcjJyJFh83jiTLpUNr1AXvSFBWf2RV/oAwDQqrilCSAMOhRHXF1wJhkRUn3SuCwp
KeRkIJTKs3mOJk71KI446AMdiiOuLjjziUoY0gjE1QVnkhEh1SeNy5KSQk4GQqk8
m+cY4uqCs7rgrDji6oIzn64g4uqCM5+uIOLqgjOfriDi6oIzn64g4opbcG7sftUJ
oeZ92sSfwmH5Ygj1a3U/+teE05zP5c1L3ZaMHdt44aK8lZJyfRP78aRyS6oXLNh4
kvGLv/cl7Nz3+6n2I/xK/ZM057FnpaeuXzstGTmvX9eRz9bOiXCpUaHxluc337Zv
v2dedO97dzpU3F7Lvf+jSZMSz+d/MOZu0y2n/zY+z1PzwMU20XWXj93T8vFff3gX
2F/t7caSa8e57zEOdHFb3KBO/L+Boc1fVJm4962m26eR+/xOuzxu1mzklSV3RrV6
NX5kmXeLl/lPDUw6NaOVsU+BPr2fGpquvdnjzwfPN2yemeSfI6nE1kefuA4seuDP
Okt/K7o7e5ODlRZHLtT3Df9oaqftQ3udr9H53/n/PG7SIV+tqmvKPr5QsdLdHXNf
h5R7vPm7UptK1t4c17ffiGXlDm+cfXZon5cVJs9OPHLx8o5rm3fOa7ig9dTDQfU+
c+c2Ln/x3cjBzwcNqN82blvMMdcK9b4sNNFpl8vaoaP3LH6zK8epSV2O//K4VZ+c
muStUydoHh18Mnr7sO4nc7Y9eTuhx7i79b9tN/vThjVqzd9fMVvTTyudmP95jtbF
1oZvuzllf88evac9vbcj9vH0v4/0HFgqOjxnxfEnnS/7PL1T+mi35vnfVjixdUjO
UT2a//w6LP7d5EHXei44lLDFP/REh97VdINO3a7fbfOaUnVyd4is9tmh7Lm1UzoP
ujps4D/t9KEPq+puXD7d/fXeBmtqP4zKU3rz9Sm5Rx8dtKh9z3PrPgoutbDVkUt1
n804XPVer7Jn9+7rf3bTjg49T/hP+PLEyg6BzZ+tHhD1U3KNn4bd771q1JinK180
TW7nu+/u3zfeur1cfX75zp9ig2+9bNm+zc6Cs/75uPDM6YsiV9+efu50t+9CK7Z+
E38i+6Y/GxXN8cuEo6+if6+Xb9mVW+1Wnmi25MWoOqcNc/bUKXu/7C7jJ3N3lTxQ
ruaxfn3bhTZY+3fxtjdia+3cvqTntri2R2OT7457dVQ7tX3Jqac6bq49O+bPAUeC
Ws4tme2TXXmaBQ//6njr4FnluswuN+fXmke0p899EXz77zNhjR4M0TRqtbBM87iE
WD/OzwjLyh74v3w4/KRb1+6d4uNiAxO6lQpsktg9rERg97jEwPbxbRK64HlrCPb/
xs4I1QX3Q8QD6UiXcR/FAswANgKAXbKhMvjfRNf6urEe4QZP3k7OqD8KQ9UQXMM0
SIctWRU54YusM/6PnDofjUVkWAVxOGcELBIhWAgXCqfgWnEk3TxvuRDSdPZqGYu1
h5kkEUrihAO+BaUlIdSA8+fXqCAtL4LnUHC2FrVnZDowxx2Z407M8UI0GpFnGFAb
9mwArR0FW6JcPqtFLp/VLJc/mb+XQ02AF/uX3ZSTG//lQYQ1OEdOFE4KkwF9ROnD
meJcABgTVeFLbYfiMGehhDELh1cMyp3E7wJTfrxwRqckPuC+ZeIPwFz4HCghFlu5
o2wdojmrcW4976mV+RI6oc6oC1qKaiCywI5EOQtI7SUFyDAlpQDpmVKATPrVaY0R
1lrY/rsChSDxSQqTYRXLUSAiPTUl2FcurPVR2C4XpNdw5hwgtE8Xy9q2LvvLhWU7
CtvlgrSUA8jbp4st2bYu+8uF2lDYLhekWQ6Uh326WNjWBbCv3LT1Jfpnn64Psy/B
n/1t/mH2JSprny4WtnUB7Cs3bX0JZO1v8w+zL4Gs/W3+IfWlwsaRCEYUBOLIo8We
xgvPresVYcRFkLEHebpIEITqm47pOWLoZNLrz9c5JYB2ir68dEn89xgVFJM5ts15
RNDcNzwLNr8I37/yoW14hPQO24rEz+B4ByY+TrMNj3/EeHWnbXhEA/ERrGZLmDSP
FDiOEsLRfMihNagEIqOPUtBUchBKiCzFB0/44Ss8qufBkSbWwgowepv8Fh8Tszvx
6WfOnMFGpaWAufAJqDkiZ9HHvyAlgkuiA3PbnQJgn5R9XZLF+59RWOiecZJ0cVAK
3XO9FvgTpyRdIYyZEgRxpkMBtHtadCsZyHdPG53ElJuGTgKvMCBURugk1BDSmY5i
DRHLx9iJjmnHV0SnOtYuWJ04IUyioUZiglvJ1vunpSEANgxh47KBWEMIktYgMYR0
bms+f3vfHkENkboeAbBhCBs9wswQ0p5AId8jpJN4xRpCuloRzZHPAW7hXYPM4e03
RNquEQAbhngf15AagIIUIDVEZ5JsQtp6RIYbIuN6RBc+JkKBhgjgh+ow1IN3CgAF
+aU5YeqSDCEhNCmyEL9Yx05qSIzmF+Afz/OghWEEGj9CINfN5aLXTQ8/36kuSLfX
44EPWbCNxJKP0HCBwAX0HRJf1oMUCKF86d8jXj6jQa1G44Shj1m6P+rHfyPcGuRH
d5SHHAI5YjMPNNY1m/4ztxjDWteK+mC3cMMM1/z6am5NDEGoTCpsBsvkGQ/WNoCi
xkkIlnk12Hk0uM5wB+Frjqu0z9pogqvH8dt+zh3G6XCHFuZZVuCBe5cT6o+q4dGP
Bm1B/BjdNMRxx/mW5xczOd1cVElDfvwB70oSGM1YwNmaFJdgGTEKiAFNWhBbIBQl
KiMgzwREecgH5wIeUlmAVJ5CyIZQemz6E8SEeBKH7R2J/4RwUqSYBuCShJATdZKu
B88tinJlTKYMNR2lxiUkDMwgukSk2wqdxj3GEOf2q+4Sdol6blt0zzKlS+TBNehg
4RJ6Gf78EP52Q+IS90ZLXGLhwiVmIQBcAp6BpdUlxIu9MX1cwlqXdYRLYANJj81c
QkzLXC7x0q2Dbjt2ibzu43TT3MMNWveeutXumdEl8uIadLRwiah3ptNESB7vmbuE
0Wg0CwHgEtp0cAkYDhIY08claKOzgDxHuAQ2kPTYzCXEtMzlEuvco/XdPGIMp92/
1n/uEW740T1O384jM7pEPlyDThYuseCt6TQT2gOW1eb4sKBR4hJ06ZNdAgWXcEkH
lxDX143p4xJwCi2ILdARLoENJD02cwkxLTO5hDta7xJggPnXGZdwA5l/hRvI/Cvz
uASZgYqtCjWBGOk9XGRxnkc7YQ5LO6/YvzguNfalnOUg2hfmt3NcYwwwv+2LbQvz
Wwidspx9Y/8D+zqhbdpxnjW9Jnhd0K7zLODVyeup9qCnh1cjfDsOcxbs29F++4Y5
WyyMZgCk9hX9nFiQBbUAu8ZA8/xRaZ6hNplcM5bhvB48z3KCRAkjvChfFcFNIi9c
hwWE8C9WpfTGYUkUiEA7qZmGf6XOA62vADaHOnmif7Sw+k7qq8Wt78ovnHXFfwn4
r0Sq2hzOJOVbQmzzOm6HfDa5b/ft6nbP51v3ab4j3LS+fd0H+SJUVmhz7Xu0eVln
bSZs80Ma0ua7sLBcm8Orbxp4TppEzwzhn5o2a9KpV3xcSd6jNYKvavhbtQf6q1RG
tisp2RJiu+7R+ukmuEwxXNNW0HVySTC81tbXNXKJgnuRRvDlGPvbtYwGxezBGqfg
8yH0wyQnuIghpF/D6QlCWAGnd3IRQ0h/jdNBP4T1cXojFzGEdGvtOtw5te361zvS
rjmS5X05HMErovnMfBlekKyPXbhXYpuEnu3jEhOxS4M7l/68bWCvuF4lAkvy743C
W64AjTAI4vLTRtHwXzhxE0wHn9cmC8Jy3eBWhneDEJ/mEXl99ZENfQZHvPS5zXX0
mRHxl88pTryka4va3w3CnLVF8+JLQ/MIPJHEoT4Sm8xHDCH9JQ4HC+FtrKchE0L6
XzicIYRQj45MCOnWusF4z9R2gwB30g3KuGuOyHUDeKtUA62URM8M4dssOlTw72AE
isggm/VvcnV15auWcb5u6xrujeq7Bhhm4HERjDfhr7lrkGGsaxPsU05O7z8ucqID
6AyFtJHFkfo89DEiY6I4RF5epqMgKaC2prkUImXOC4T2EShEwtmpsXtKyNp2h3kd
2B1eGE+93eFs1e4sbNkd1rzA7jCWTL3d4WzV7ixs2R2sB3aH+37q7Q5np7/dAzij
ETSM1nzDjzeL47/qaC5fClwfh6JAV0uGLKylswARKgcPOIxGI7+EFRMTw8chvHXr
ltlDkMwgkxVhjas99vjQZFSoUJHxuGfUInKnuo9gmRzuZgCYBNm8OahQocIM95GP
VhzFAqgXWbvT2XM3VGVUGVUm88qI91a409J7qzVpe0pUZVQZpcmIXoQD1YtUGVUm
FTKiF2mROs9ToSI1EL0InvyqXqRCxftD9CJ4gqV6kQoV7w/Ri+DFJNWLVKh4f9zj
jNww0/sfs01Hi/m3nsQV/SWmt3Ckv24hcS5SlID3QtgXWch7IkncWrRST95eg7e9
+Q3v+sHvswngfQuqXfqOhjRulmCRKUBOBkKpPJvHv9DYj1CWk00vaAXioInVYVOf
PcJyMoRKysShUhJZ2fLTBIE49A/QoZgWp8TBQUCHYoi7CsSBMKuDPSbvEUtgTZiF
nAyhkjJxqJREVrb8tIASB31sfdjjLE0cZjdsfdjjLE2cbnhH09njLEmc3s7Yd1wB
0rpZwB5hORlCJWXijridUeIwCGLrI62bBewRlpMhVD4c4jBKZOsjrZsF7BGWkyFU
/nviri8JcaoDNPbQLP+E1gXgeB9/abFtimz5qUHtqwP8S6HenDTdGqR1lSUlhZwM
Q8YENo+1spyso2Ghn02wyBQgJyNHhs1zFHEyX4PfrdD5GjgY/cQlq9VmDewRlpMh
5FI2hSO8HgbKQJzO1xQzeqctTudrNN2mPnuE5WQIlZSJO6LFKXE6X6Pp0rpZwB5h
ORlC5b8nDvcSIM7O14ZORFn3BtfZeV6Fk74xHAyUgTjoY+vDHjueuCNaXCCuuPka
9fGU5muysEdYToZQSZm4I3ycElfkfA2IK3K+BsQVOV8D4lQHaJx6KAvP1xpOmJng
l0udr9mEhX42wSJTgJyMHBk2z1HEyXwNnsKxz9c6CrmgVVHTFiBO52s03aY+e4Tl
ZAiVlIk74nJHiStvvvaSEDd7vvZXNbPrPIE0yghYChPIyRAqNohbXOfly081Lnbg
py1AXJHP14A46GPrwx5naeKKm69R4inN17IkcXpVV+R8DYgrcr4GxBU5XwPiVAdo
/KeZMevO1xLzHuyR16s7J023BmldZUlJISfDkDGBzWOtLCfraFjoZxMsMgXIyciR
YfMcRZzM1+A7Wex8rZOQC1oVM1+jxOl8TTHE4ZIKxJU3XxOIK/L5GhBn52v5R8Rk
3Rtcj6qe5xf7xPMTVSAO+tj6sMeOJ+6IFheIK26+Rn08pfmaLOwRlpMhVFIm7ggf
p8QVOV8D4oqcrwFxRc7XgDjVARqPThyadW9n2yIONfyjkTpfswkL/WyCRaYAORk5
Mmyeo4g3dt+CO1XzPm3il+JwyBQ8QWh1f96JBtki/Q+6NTQEF/cdYuSGflq135kl
A4oF7hte3Nfv2Zn4Cy7nS11q/2Pbx/uu/DUhj1uyx4mLVZ/dizzxzuvc7ONbJ/7Y
rf05v9+Htvbb2KtPRLdlD7++7P/73hl98iUXbBfyct/viZcu/fjLkMFbdzePH7gm
MVQ376e4wZFjhrT+u8hHrWNW//6kWv1HC8YdeXms34CvtGsmHl54/nVkxYv3q/+8
4mzBdc27rZg8xGPKpwGf13h5IHb4nDfbd2/e2LhUQuLmhr8/GbQn98vI3w0Fud2V
z93utbPwtkbZTm72Ll4x/3fb/4m98H3TQkWutZ668/B39f13tPnk4IaPtl0vv29D
QP6ac4stu1E88cLkUsO/6hYxfMrmT+sGd9VWL1x9bOPk2M0hB+d1LvdJAU2n/d02
bP8y6pMfXm1tuPzMtjy9hvX+seUfRR87tT2yak1/fcWfIqq2Cdt07e9ZrZqta7rl
2hGnbqNXvAkccL1mt/PO63x9B179adncz/c1XPU6rvJPU8c8HtbvzcqwUk9K9Cv+
0O1a2MO+sw/92Kxet8IlqjT6fv2t4eMiB4a6d0mofaPeoGdXxv8+a4qm+MR5cxZX
un981cZN/nO67vDSNtfn1m/L/WrXrah33vv3GPqOKnSpjO5el/kFDtXtvyhx7u1h
nxSq1aXbD34vG48v3AKtrB1mTEi4H/z91GYVvXcU2DZ56b5Dnycc8oyeEFLYNXbE
6gp+G6tHHerctlhoYInYLZMnZcfRbJ+P0UQXWDVh+Goc/a7ZZ+N3xWa/ueba4XaD
5m3v9Ljd/N2ze/h/W6Rb+4WVTuatNcOv3ZnvnP0+aVvo8zGTZ+7DZ+SO/kyHFXQN
wsVPOruvcVsOKyhUoASOBs/wc8YK8nhE42j5DdMCsPiftbFwgVVjoGJRPS5Xnh9+
4Ly+54WmuPVc67WLLRb6pHNupr5PIiZv8YrOdsvpm+pRQ5fu+zg6esOm4FMuTiNW
ayXVTqEShUpH7+9/t9+TgNZFEh5WW7C02+tqow9uuvz87ITFs0/WxZwKrWs/FJ93
yP7KG7F4LWxKz+h6IYVrtdo49um5Hr82Crmee0/CtdtPxh2p0urGv2Vd9pw4nKfr
32Hl37wN/aPQ05DB2kWDbuY5Nf/hn8OnPixcqpWh1dXs4xp1fXzGrfTYvwtHfvG4
SdQ/1Q63P/zTzsvlL3uHdr6j63pqWXD9KgOLf1zjueu9FR2+HTbz1bjz3Wpsm/Z5
/U1Dlh661ij+6l/5xozb2PW3YbeGfTrks3Nz32yuOeXI+nrewXnDjzZddODrBPRs
fvIrtyNNbl4YUnaZ36pmBWdHV6jQMmzTrFNXxp0M7pit9y/Zuk7du/fE3s1jxn5f
72Tw7Vs3V9V7/uLFqE7Zsn8yZ2G9306daDqnV+V5bf6ssb/WD/XqJ5eukj38i65D
7817dS/fzT2ed5Yc+mjjqHsFBu6Ne3h3RYcGLsnlB+4Y3Ll79yl7+uUa9Pu/Ba+0
fNp8ReuGF+q2/+Lil7fqndyzfX/P203uxiW6ni0ydvzFPjWmDtuSa/Cq6iMatWkS
kL3WiE/X/jLm/B5Nbu/Ws5vHJcT6cX78Z9M98cgMPvFeOPCTGuUqtSkRWLRnl04J
gbGhocXY7V0qB4oC/MZNIYEgVwyfH4Jv8I3xpL2usEQDF1tYvsqoi25mA5gBbAQA
u2TjN1Xr6FJfZ3QPN3jxdoI9csNQNQSDFA3SYUtGIicUi2AHHXLqfDQW/+uLxBWx
ETCXQLBeQiQEFQhxrTiSLuYBlgshTWeHQ7FYO+zYQ5HECQd8C0pLgm0D/fmpDKTB
cmUOfhMWD7Od7OOZY9jghQIkKdg+8r7HC1FRDVkmg7kFqxlAmVGwtZHLZ2sol8/W
Wi4fwOaDVWi69EG8NF+6/iHNly4TSPOls2lpPrTUZFQUiZvo2frLbpKGTS3y479A
BPsHwe5CsD0fQkH4rzD+C8Z/OVE4soZHEST04UxxLgA6FIrgNcXj/tBNUgK/mW50
A45JwmjCxB/wXxPg+BK6ou6oh2wdojmrcW49f7UCj0MoEfVEvdBSVAMJMxNRzgLU
ptYAMkxJKUB6phQgk351WmOErTiALcX7b7axnO8F7Icc5GBfueKO3vaUC9JrOHMO
ENqni2VtW5f95YpbMNtTLkhLOYC8fbrYkm3rsr9cqA2F7XJBmuVAedini4VtXQD7
yk1bX6J/9un6MPsS/Nnf5h9mX6Ky9uliYVsXwL5y09aXQNb+Nv8w+xLI2t/mH1Jf
KmwcicRxpzjyaLGn8cJz63pFGPG4g4w92K2qglB90zE9RwydTHr9+TqnBNBO0ZeX
Lon/HvNjJgEc2+Y8ImjuG54Fm1+E71/50DY8un2HbUXiZ3A8nomP02zDYyAxXt1p
Gx5TQXwEq9kSJs0jBY6jhHA0H3JoDSqByOijFDSVHIQSIkvxwRPTVz54cKSJtbDr
JHqb/DaZDEWhKSEdvsLrb+oEYC58AmqOyFn0SQlIieCS6OTEdqcA2CdlX5dk8f5n
FBa6p3QiwQxKcdd0dwP+xClJVwgzfQ8Ld1XOdCiAdk+LbiUDy+4JsNFJTLlp6CQw
P0GojNBJqCG68TERijWEdOrZhGuQ59bmb+r/yF+EyFTH2gWrHGc6FADbtLK4lWy9
f6bKEDYuG4g1hCBpDRJDdDfPlczf1mvfr0dQQ/xXPcLMENKeQCHfI3rwMRGKNUQi
HxMRzX3JYwvvGmQOb78hMvwa8T6uITUABSlAaoieJNmEtPWIDDdExvWIXnxMhAIN
EcAP1YFiLj6FbvktTF2SISSEJkUW4r+uyU5qSIzmky3BefC7yxOQvWw90TLtRa9L
7n6+R7RIt8P9gQ9ZtI7Eko/Q++9l+4iXz2hQq9E4u+k5TfdP1T60lIcc6P6/Hsjo
sl/PucYYlrjc1ud1DTeMdzmlL+faxBCEyqTCZvCoIOPB2gZQ1DgJwdKvBk88NAj2
Vod/EV+lfTKjCX7BdnZVjg9zVed0uEML8ywr8MC9ywn1R9VQLC50C+LH6KYhjjvO
tzy/mMnp5qJKGtL79aZcoxkLOJvuRi8PRowCYkCTFsQWCEWZuxF9LiLKw3o5yAAP
OJZCKk8hZEMoPTb9CWJCPIlDiIvEf0I4KVJMA3BJQsiJOknXg2c3RTlxg+dQ01Fq
XELCwAyiS1R0/VX3ArtEC9fHutPYJT5x/UN3N1O6RH5cg3gLl9DL8C/L42PiEtEN
JC7BbkhDAS4BzwHT6hLeplxj+riEtS7rCJfABpIem7mEmJa5XOKB6/f6tW4xBj+3
/fqxbuGG/7mu0S9yy4wuEYhr0NXCJaLemU4zgfeITRW4OZvcRu11qiFxCdiXiQ0B
4BLadHAJcWhjTB+XoI3OAvIc4RLYQNJjM5cQ0zKXSyx1e6OLc48xHHYL1Ee6hxs2
uLnro90zo0sUwDVIsHCJBW9Np1ng12OAuhKXoEuf7BIouIRLOriEadifXi4Bp9CC
2AId4RLYQNJjM5cQ0zKXS7z1SNQne8YYCnjO0F/wDDd4eA7WP/XMjC5RENfgbbLU
JT59bTrNAn7OFXNM71tO4hKwox8bAsAlXNPBJeDlKgJj+riEK7J8DwjgCJfABpIe
m7mEmJa5XMLfq5c+hy7G8LHXLP0Tr3BDoJdR76nLjC5RSNYlyvzPdJoJPg91pUv3
v7uHxOx1Cfd0cAlYViIwpo9LQB2kr74BVJdIvUuU0LXWl9THGBrohuk99OGGirou
+gL6zOgSQbIukYv/IbwMjBU5Gpq7BOz5yoYAcAmPdHCJ7KZcY/q4BHRl6dueAEe4
BDaQ9NjMJcS0zOUS1fWx+hreMYb2+tH6QO9wQ319d/3H3pnRJQrLuoTTS9NpJsxd
2vJFXc49iU6z7VtxcksHl/Az5RrTxyXgiYf0BWeAI1wiq644RXtP82phiDF87b3d
q6Ih3BDnvdCrgSEzukSwrEvcfW46zQRu/44hrwY9jyCxaDtdwjMdXCKbKdeYPi4B
XVr6Tj9AdYnUuoQ7WqYNMJDHm+EG8ngz3EAeb2YelyAPeMVWhZpAjPQeLrI4zyNe
eERMO6/YvzguNfalnOUg2ned9qLXZJcYw2kt0nXFtoXHxxA6ZTn7dv0P7OuEtjuP
8yzjOcHrovM6T51nJ69/nQ96/uvRyAuhMGfBvjH22zfMGcXwCjIUUvuKfk4syIJa
gH2ET/P8UWmeoTaZXDOW4bwePE/Y+BdQwgjjkkgEN4m8cB0WEMJ/EFn254whgbGB
oaHFSqJABNpJzTT8EzUPtL4C2Bzq5In+0cLLbaS+WnyrcOV/f9YV3eJf7yyRqjaH
M0n5lhDbPML1kM8Kt+2+7Vzv+Yxwm+Y70FXr29VtkK/Y5tqO79Pm2o6CigxEerf5
IQ1p810aeFXOss3hl2UaWH1LomeG8GtxzZp06hUfV5L3aI3gqxr+rWsP9FeplNqV
tE7q25WUbAmxXT21r3UntSu9S2nz61drR3rX0lbUT9Mm4K5XRvP+vlxGg2I8scaV
+HwIX2OSJ5kQ0kvhcKQQ5tcjtJoJIb0WDkE/hBVx+jQmhHRr7TrcObXtWlTw5VbJ
8r7M8e3qbubLIEV9WdqyZLzD5U+pZdPqsbZbNvfy5hGeK/SR1ZYPjrix/DYXtXxG
xPHlpzjGY4va37LYY4t6rkhObh6BdeNQH4mwBjGE9Bs4HCyEt7GeakwI6cdxOEMI
oR5RTAjp1lp2vGdqW1bXhLRsUJPAd3ItC7/D1MC0L4meGcJPAqNDBZcNRqCIjJtZ
lyUXTFe+atYbOa3ua+uy7I1quAQYxuOhDgwh4a+hS5DB6NIEDyWdnN5/qONEx8QZ
Cmkji4PvefwnAeDdqs6I/ASYDmykgNoCIwoob14gtI9AIRLOTo3dU0LWtjtcW8Hu
+VFa7A5nq3ZnYcvu8JYI2D0QpcXugUi1uzls2R1uG2D3AigtdoezVbuzsGV3eN4N
di+I0mJ3OFu1OwtbdocBD9i9MEqL3eFs1e4sbNkd1mTB7jCWTL3d4WzV7ixs2R3G
42D3QigtdoezVbuzsGV3eFINdg9CabE7nJ3+dg/gjEbQMFrzDV+34vDwBIqAtdWh
KNDVkh4La+ksQITKwSMeo9HIv0kJ78lAHEJ4QYB9DJQZZLIirHG1xx4fmowKFSoy
HveMWkRuU/cR50xuZQBYWbR5c1ChQoUZ7iMfrTiEBVAvsnans+duqMqoMqpM5pUR
761wp6X3VmvS9pSoyqgySpMRvQgHqhepMqpMKmREL9IidZ6nQkVqIHoRvE6lepEK
Fe8P0YvgzWLVi1SoeH+IXgRv+6pepELF++MeZ+SGmV7+mG06Wsz/6lNc0V/C//IJ
O5zFr0BJnIsUJeClEPYtFvKSSBK3Fm33Iq+Ew0si8GUGp37wmVACeN+Camff0YCS
LN7ZYBMsMgXIyUAolWfzYFgLlbImm16AzXSBOGhiddjUZ4+wnAyhkjJxR+zwS4lL
W1VaNwvYIywnQ6h8OMTBQdj6SOtmAXuE5WQIlf+eOGyfDMTBt0EHhO3bP49k60au
FhLVrAB7zEJOhlBJmbjlns7y5acG5IN81Tja4qCPrY+0bhawR1hOhlBJmbgjWpwS
h9kNWx9p3Sxgj7CcDKHy4RCXbqoorZsF7BGWkyFUPhzi7AuuAGndLGCPsJwMofIB
EBcublQHaNz9t6Y6rYtVsALWhOVkqCJRSoa4xcUt/YgfaDpof9NwjpOmW4O0rrKk
pJCTYciYwOaR33eK6VJZR8NCP5tgkSlATkaODJvnKOJr0R5P8sNCPIjnR+/gYPFC
LqvVZg3sEZaTIeRSNoUjvN5VIE5H79amLa+d6NenBLAC7DELORlCJWXiUClWFiuX
LT8toC2uyNE7EFfk6B2Is6P372Zfyrqjd/IJvCr86B2IK3L0DsQVOXoH4sobvQs+
TnUQjUFZdxDLw1iDkyZZg7SusqSkkJNhyJjA5jlqLGcvLPSzCRaZAuRk5MiweY4i
TpagA5H5EjTdRRO0WhvLWdSITbDIFCAnA6FUns0DUzhiCRrGi0CcDmJpOnvMNosJ
1oRZyMkQKikTlw5i4ZARTxfAJRWIS1tVWjcL2CMsJ0OopEzcIdd5gbgiB7FAnB3E
Xr70KusOYnf9iFElgh/EAnFFDmKBuCIHsUBceYNYgbgil6CBONUBGutMcc+6o/fC
daYE1fGL5KTp1iCtqywpKeRkGDImsHmOGsTaCwv9bIJFpgA5GTkybJ6jiJMl6ALI
fAkavrIIYLXarIE9wnIyhFzKpnCE18MMAYjT0btipi20xaXkbOqzR1hOhlBJmbgj
WpwSV+ToHYibj94nZPHR+4+h/OgdiCty9A7EFTl6B+LKG70LPk51gMZfj70x83FZ
sALWhOVkqCJRSoa4hY+nH/E5/Lb3ERx6SfYIoDqAeMKFvy2IS+OypKSQkyFq5AuH
kB/LWRJPN2zremFr1xbhnDTdGiz0swkWmQLkZOTIsHmOGsQ2dq+GVTXv0ya+FA7n
LUaoX6v78xp0u1gj78gixYbsi9jS+fvNxQJ7Xnf273Q07nS57I0LOq3Qzq1wfO2c
Wdvv/lU+7vQXu1F+Y4vCL4MvVrp+rFLOahq/o8cm9p09sfWJ7S0q/RF/ufb0Te0i
yk69Ev4wvkmH67/+0ObJTp+/Z14Z3qzK6ImXp14ZsuPZ+qrj3eb1mTHi0y5PhtZ7
9VDf/+/LXapvdnu8qcST11tPDR644+LayvdL3a6/rkHlSxOfN1+z/vzRaw9+Trr3
qnXNIx/NWP3RO7+dowz/9Lj77n8Dfnhbe9Gac9c+rrOz05T2U+v7F+1QpH79+rXm
NNrzw8IWXza8+WjtuE1uF47+/VHeuoNbrsp9r8yxp0XvNu3R9ljVia/v/F5q4soF
eX5Z/eVH+qcrS/07qEjLgJqvv7q16NfIplEzO69IztFsRtN8nav92FZzZOwV/5pN
Pmp/9ergVVsGrj9/UJNnQq3KRfdrPYs/6Lrv7fJdEV8X6BU38+yG8A09okpcmOCx
e93Iz357c+HjK1c+uzbY+/kv07+ueq7FgWYr306tcn1e/K69a2497zuhz5dXWs/s
/XVE9pW7O595PPpugydRXcofizp9tfN3zxbpzn36db3gNRUCfxx26eSJr4fvOJLv
XOzDwK2Xezkb+5weHHHnxpivviq9Z+jLBRt/2DS50Yyl7ypdcY1dU/n73OcHDFvu
0677v7EV620OePF1voU1f8u3/aDrHE3c0tX1c4w5tX719IdfTZu+sXJ0kCtOqjZl
Y+OoI3faTg749UjlRatz5EbTNjphsdWrL0Z3LYeKxrmE+A3DIvnrRBcrEdd7Q23d
kc+iv/5n6cwv573YeuHg35V7d7h3sMXLiX+cr/m6Sq0qe3/u3i866ED/EXBOkXH7
OjY+N2TGlSViuUtWD63SxUOPPovWjNu3cPW0s5+28ovuf/BYLWdj46ikgqHfTZ9e
ZdUEV7R0tbFm24a4ZoWw2qWrS+UY06PVxpVPL/d53eyrg9/eL5PXp0b5+de6d/Qf
bhQ0NTt3ZN5ccsyXi2l9Ft0yxG9xdHT/bL/YLj8yutiqb3f9K1Wye/RVKO5wwdDc
M75cjA3XCkXv2NS8I2p4xLMZMeGTKYeOVGlfwabpxj+dYrLapjZvNsyNfFNXH1bx
5rjFxc9++cfutzH3V13Kv2Tk9VHuLX9a1eP6N6+uDdm6pOybDUXn91/StH2ViM8K
tg7stcZrx4FHO8ut5EpcD1uweck/GyNnfhW86uL6PyonzHp6aVKPkg2bJpZYurPH
9dWrOgwt26Tbkfn9nwW93Dro8aUXxX+d9+uj7olLV17LP2LE6QW1WzZ5WC/2z9f/
Rrf+rnfOPfGTl3WOv3Za84Ph4enlPfPPr37NbfBbw9nmNw2tY7/6PL5tVOjd+F1f
7l/d7kBs6bZ1A7L1TKrV7smbVw837du3LyDbgSUXX7fd/8/Ll/1mzJoV0O6XWdMG
tl49a9a37QePYeL37t075pctW7u6AVMTH44fMyI0eHydHS/2jz18+/btkNDQ0APD
Q4u92N0s9Gpyrz++wEqm+m1qGFrp9ZxNwf2+b/vLnZYv70xoddXgfCwyumrUt2fb
PWu/6vKCDq2qZhv0x515d38cqV13OOeVJRERY58G/TnabWnrhqOqN/3i7dW/+xkP
73eOPrp+4MlvCs2qViDs25GVgn/o2fNN1P7sNzx7jtjxy1dt1nbPfghHZnb+OXut
ntc8mx6bWeJY9sG+/+Dsm7Ej1pxP1nSJXDCjeVxCrB/nZ4QhvxfyQEUR7OLRsEbJ
0ECLHXlCQ4sF9kpsk9CzfVxiYlws8kQh+AbbGE+h6goTZrjK0/svc5FWLMAMYCMA
2CUbv3cW7L5ldA836Hg7OaP+KIzfd0OL/3TYkjXxBCwWz0ydhV8LzUdjEflIOF2f
GCF8KZZKCCoQ4lpxJF3MAywXQprODkdisfYwkyT8skg44FtQWhLsDufPLwtDGvz6
KAcagGDLj+6MTA/mOJE57skcs30kLccLUW0NmbLCb6zYWgAIRxFszeTy2drK5bMM
5PIBbD5YiKZTq1vLl85MpfnSCZw0XzrPkeZLF/Ol+fDbs8n8J4TZX6vZ+stuOqMI
/oPrRzHEf0YYlUCwewxCJRFsBoNQaUT2jsuJwpE1PIogoQ9ninMB0AnRJ7y23qgv
6icp4TsY/EdLX0Cpw8Qf8CsaNfgS+mB/GyBbh2jOapxbz1/hqvMlDESD0NdoKS5P
eKYvylmA2tYaQIYpKQVIz5QCZNKvTmuM8EoH6/fv/3Hp5SgQ0cUk67CvXOhfFLbL
Bek1nDkHCO3TxbK2rcv+cmGZncJ2uSAt5QDy9uliS7aty/5yoTYUtssFaZYD5WGf
Lha2dQHsKzdtfYn+2afrw+xL8Gd/m3+YfYnK2qeLhW1dAPvKTVtfAln72/zD7Esg
a3+bf0h9qbBxJIIRBYE48mixp/HCc+t6RRjxuIOMPditGYJQfdMxPUcMnUx6/fk6
pwTQTtGXl4aR0mN+GyABHNvmPCJo7hueBZtfhO9f+dA2PAp+h21F4mdwvAcTH6fZ
hsfkYry60zY8Lof4CFazJUyaRwocRwnhaD7k0Bp+xAejj1LQVHIQSoiE4SBCT1B7
RJ5L8OBIE2thGyr0NvltMt1c24lPhw/P+Zs6AZgLn4CaI3IWHdyClAguiU5obHcK
gH1S9nVJFu9/RmGhe/aVpDODUtw13d2AP3FK0hXCeJsSBHGmQwG0e1p0KxlYdk+A
jU5iyk1DJyE/8yojdBJqiH58TIRiDdGHj4mow/ny2MBfhMhUx9oFy9IQsN0ni1vJ
1vtnqgxh47KBWEMIktYgMUR/81zJ/G299v16BDXEf9UjzAwh7QkU8j0CFmBYKNYQ
A/mYiGjuSx5beNcgc3j7DZHh14j3cQ2pAShIAVJDDCLJJqStR2S4ITKuR3zNx0Qo
0BAB/FAd/vLwKXTraGHqkkwX+xCaFFmI37ibndSIi4GQT7aW5gGbtAoge7d5omXa
i16X3P18j2iRbof7Ax+y0B2JJR+h99+77REvn9GgVqNxdvNsmu6fqn3XKA850P3u
PJDR5Zmec40xLHHJ5Z3XNdww3kXjXc61iSEIlUmFzWB5NePB2gZQ1DgJwfRDgyce
GgR7dMO/iK/SPqujCfhwEaAsp8MdWphnWYEH7l1O+IZfDcXiQrcgfoxuGuK443zL
84uZnG4uqoRrkgvBwwoKoxkLOJvuai4PRowCYkCTFsQWCEXBVYUFeZYiysN6OzgX
8JB+Bw4glacQsiGUHpv+BDEhnsQhxEXiPyGcFCmmAbgkIeREnaTrwfOeopy4oSHZ
fx6QGpeQMDCD6BIVXbfqXmCXaOH6p+40dolPXH/R3c2ULlEU16CHhUvoZfgHXiv5
aacLJyPoswxzl2C/wU4BLgHPDtPqEjlNucb0cQlrXdYRLoENJD02cwkxLXO5xAPX
nPq1bjEGP7cq+rFu4Yb/uRbSL3LLjC5RDNcg0cIlot6ZTjOBd4XZXhwf5oqUuARs
RcCGAHAJbTq4hNiKxvRxCdroLCDPES6BDSQ9NnMJMS1zucRSt2f6OPcYw2G3XN6R
7uGGDW4a72j3zOgSxXENelq4xIK3ptMsID9wokuf7BIouIRLOrgE/BEY08cl4BRa
EFugI1wCG0h6bOYSYlrmconRHp/o+nnGGFZ7dNA18Qw3TPNooIv3zIwuUQLX4G2y
1CV2vTadZsJXzZd1Ov13bY6PcA0kLgGb2LAhAFzCNR1cAmbKBMb0cQlXZPm+EMAR
LoENJD02cwkxLXO5xHDPq7peXjGG5Z4u+oZe4YZJnvd1Hb0yo0uEyLpE0v9Mp5kw
99qBSf3m+5GBU/SndrqEezq4RD5TrjF9XALqIH1FDqC6ROpdwujVSdddF2NY4jVB
V1cXbhjv1VsXq8uMLlFS1iX2wU+ZJSADpnocDc1dArY5Y0MAuIRHOrgE2JzAmD4u
AV1Z+lYowBEugQ0kPTZzCTEtc7nEIF1PXbw+xrBQN1NXWx9uGK0boovRZ0aXKCXr
Eodemk6zQLNzI797+VddO1ec3NLBJehjiHRzCXjiwboE/U6sI1wiq6449dMf8+zo
HWOYq3/kWcM73DBc/7vnV96Z0SVKy7rEsRem00xY6HMt6OIg+up5tJ0u4ZkOLgGb
vRAY08cloEuzLkHrpLpE6l2il3dBfawhxjDLu5aeM4QbjN6l9M0MmdElysi6xMnn
ptNM4MdLwTXIwClY+lxCDuAS8G5OWl0ivynXmD4uAWBdgnZtR7iE8Mcem7mEGM9M
LuGOlmkDDOSJf7iBPPHHbsE/8c88LkHeeRBbFWoCMdJ7uMjiPI/ewlsTtCeJ/Yvj
UmNfylkO1L5OKML1kM8Kt+2+7Vzv+Yxwm+Y70FXr29VtkC9CYc7EvtqO9ts3zFnb
UVCRgZDaV+yHxIIsqAXYty5onj++cwPDQxrSp3dp4IeFwBO2JwSUMPoh8sMwDSye
JdEzQ/iltGZNOvWKjyvJt65GaDcN/x6MB/qrFPjzP1oYMJM6afHlypXffQQ+/5aA
/0qkql3hTFKyJUS/Wae96DXZJcZwWot0XbHPwJsyEDplOb/p85/4TTZtDv0f2m+9
K2or67dou3g30DbWz9N+4Y1tpRHsG/Me9tWgmGy4It/i8yHMoUfoDyaE9Io47CKE
lXH6FiaE9AY4BP0QNsbp85gQ0i3tS/xmuHNq/aZcMvGbVsnws1dLv4GfQ2pg7mSk
Z4bwMyny8+8SUschtz4uf0qOcyuDHccJ/eE8ztPHc4LXW+d1nvc8Onll1x70POPR
yEu8IL5Pw4Y5oxheQYZCvmEBqWtYrdCwy6w0bE2+YfOaNSxMMFL6XX9JFIhAO6kZ
+YqOB1pfAWwOdcq4NiflW0Js89zLm0d4rtBHVls+OOLG8ttc1PIZEceXn+KYm2DR
92lzbVHPFcnJzSMwKxzqIxHWIIaQfgOHg4XwNtZTjQkh/TgOZwgh1COKCSHdWpuP
90xtm+uakDYPahL4Tq7N4ZfJvDMn0TOJM0eHCnfBYASKyLCZvQsS87vyVbPeyGm9
I9pqZG9UwyXAMB7fEWEECX8NXYIMRpcmeCTp5PT+d0QnOiTOUEgbWRx7z0MfI/K2
YTdEfhhP739SQG1NsyNEypwXCO0jUIiEs1Nj95SQte0Or7SB3YuitNgdzlbtzsKW
3cFWYPdiKC12h7NVu7OwZXdYLgG7F0dpsTucrdqdhS27wwAZ7F4CpcXucLZqdxa2
7A4PkMDuePiSBrvD2ardWdiyO0wiwO6lUVrsDmerdmdhy+7wWg3YHayServD2ard
WdiyOzADu8NnGVJvdzhbtTsLW3bPj4jdYV0z9XaHs9Pf7gGc0QgaRmu+4etWHJ5Z
QRGw9DkUBbpa0mNhLZ0FiFA5eNhsNBr5d7rhjT2IQwivKrEPpDODTFaENa722OND
k1GhQkXG455Ri8ht6j7inMmtDAArujZvDipUqDDDfeSjFYewAOpF1u509twNVRlV
RpXJvDLivRXutPTeak3anhJVGVVGaTKiF+FA9SJVRpVJhYzoRVqkzvNUqEgNRC+C
19hUL1Kh4v0hehH8SEL1IhUq3h+iF8Fb1qoXqVDx/rjHGblhppc/ZpuOFvM/thVX
9Jfwr55hh7P48S2Jc5GiBLwUwr7FQl4SSeLWopV68io+/LYFvhHj1A8+WEwA71tQ
7ew7GlCSxTsbbIJFpgA5GQil8mweDGuhUtZk0wuwBzkQB02sDpv67BGWkyFUUibu
kI3RBeLSVpXWzQL2CMvJECofDnFwELY+0rpZwB5hORlC5b8n7vqSEAffpvofPljL
sXWT/ZYAK8Aes5CTIVRSJg6VohUS8mTLTw0u8cjO0RYHfWx9pHWzgD3CcjKESsrE
HdHilDjMbtj6SOtmAXuE5WQIlQ+HOAxI2fpI62YBe4TlZAiVD4c4+4IrQFo3C9gj
LCdDqHw4xGEQxNZHWjcL2CMsJ0OofDjEYZTI1kdaNwvYIywnQ6h8AMSF2xnVARrd
V6NIWherYAWsCcvJUEWilAzxDLydlb4U5PpN9kBOmm4N0rrKkpJCToYhYwKbxw4a
5GQdDQv9bIJFpgA5GTkybJ6jiJP5WlEkztfAwej+7axWmzWwR1hOhpBL2RSO8HpX
gTidr1mbqL52ol8+FMAKsMcs5GQIlZSJQ6VYWaxctvy0gLa4IudrQFyR8zUgzs7X
TnZaxbF1y1Lzta4LT7tW7krma0BckfM1IK7I+RoQV+R8DYgrcr4GxBU5XwPiipyv
AXGqAzReP/lx1p2vFQl1X503dxFOmm4N0rrKkpJCToYhYwKb56hpi72w0M8mWGQK
kJORI8PmOYo4ma/Bx3vY52uJQi5otTZtsagRm2CRKUBOBkKpPJsHpnDE8zWYGgFx
Ol+j6eyx4wexlsRly08L4JIKxKWtKq2bBewRlpMhVFIm7pDrvEBckfM1IM7O1xCq
a3aDc3xXz8AbHA9jMX6+BsRBH1sfad0sYI+wnAyhkjJxR7Q4Ja7I+RoQV+R8DYgr
cr4GxBU5XwPiipyvAXGqAzTO3dc+687XjJ139Zr6ewgnTbcGaV1lSUkhJ8OQMYHN
c9S0xV5Y6GcTLDIFyMnIkWHzHEWczNfgo5/s87WeQi6r1WYN7BGWkyHkUjaFI7we
5oRAnM7XFDNRpS0uJWdTnz3CcjKESsrEHdHilLgi52tAnJ2vdXbWZN35Gv94LTCQ
oy2uyPkaEFfkfA2IK3K+BsQVOV8D4oqcrwFxRc7XgDjVARpPFdRn3fkaPF5rvqQA
J023BmldZUlJISfDkDGBzXPUtMVeWOhnEywyBcjJyJFh8xxFvLF7I6yqeZ828ZE4
HL0XoX6t7n93NOFCLf+RnX7IGXircMdS9QZoznTNv9BlWkLsj56evy9v5NZx55RO
Y3oElFgUuWHFmemntt0qNW53nectO13aUvHroTm+7FDjs4DJo8pudPpjyptc7kUn
vPx1/IlX7yb7dn+49MrgC093Xe5y4kIlj/89XHX+yv2Ilc9+SVic4+DgIZ9eWv/D
u58WV+v3csbNszuvrqt45u53oe9iNn28tkjXhCVTB5eb/2/gx2uj3kaV8JhTpGXP
G8nlVrT//dCvj2bOPN69acsX2+4+q3V/Q/VVZ39o8+Ol8X82Cp9fY1jnvpdjygQ8
cJk3Y+SDmZETTq+L/2rwhmsfx48Zt2JBi7hx8/5Xx2/fvLDjeXo02Dtx97mNq+bf
3NrhXHGPAXX+8L89+OAXATVf//n5uK3aL64vO7Pm3YWpcf1PL53Rs7hnwyZv5s+s
eb3RvQXVVkV9W39ilcSkkXvb5J4W75wr+9Y+e+s3DF+w+/FvRxLudOnRbvHqGRPz
5Nm1eGbnTw9/2+ZJfIRnlTHdc7x73WLnuXrtSla9vMq/QVjVd0F5kpMCzj97+3XZ
NQ9zzl+7rlXvzW3f1my8JuHV46gzF8b+HeUz7tmpiGv17joXjfh58sMb1abu+C3b
udiI6b//sbWF78n2Z25rf12y5ru7/0RMfrng2synkyPzfvqgaoTPodl3gs72W1Z6
tF/ozrc5P21UJXu7C+W/ObOkl9PrP39pY1x9qHNc4dAcIV1uV8y5seCq6dP3cVGx
vScfGosz2hUOnZQ9umXQxoIlNv7ZrI4utmZUzjGrcVaFKD/n6Mlna+L0gqsmCKec
bxX1dkfP8CG/PrgWrf2lwNDGE5qG5sXCUVF+7SZvfLfpVamNN06ONRZclfRZ25DG
Ud9O3WKM0vpHu8iVZVP9tZWxZxdUOfj0/L1q82sG5i1Y9Gy/MXsnL6rujs9Yszro
wNC4klUPT+aPXXG542pE4bPzlBjzzepDdwri9MlnD3zWNrDExp21cXrslg1TAnC5
pfyicVZX4ZRdzzfeOTHv2qsuffKfKOjj7Tut866xV3HttmycEuA1o3xNLNqUi6p/
Lm9z34ax2W2aR47S+FVTvhzyIO+J1pte/1vW7WH/22XdBkye/ir8xzuNBy8/YNh9
6dW7Wzt+29xoXLs9EaUWHHgYUbdHyx6bwlsnLMmV/NVPl6+sPZ+n003vKYOrdHcJ
vl8z+Ir72hLXwjY32X21+8eFW3+0+XCHjf+reHjTpu3tHvRtur/SJ10Pl5r+4PmE
o2vnexxv9JPHwNtnv/ir3rMbhxtUvj+hanKvQT+svXb32C+Huy3p9t39z9uHvf6p
07lWbxbVLFZ+b2hE9KMH5TpX/aHIyXmdOi6rNiT819+bx7fd0fZ4YpmZ2XvmKHug
g29ogeAbQ70mHF7VdMixbNmyFQret+Tj1wP2/3PvXvz8WbMCcPb+P86XCB72cwwb
HTVq1NN9+/aN9ggtdrx+3URT+s2bN03pu1uFXh2y80mLgrjIJJ+pb2bg1A1hOUeP
GVOyQd1Syblcs321YlZIzWcjuz3Sjt5x69nq+R6tNg/YPmpg3I/fD2iyTuu/8sXN
pU1PaEs3/6lE1Rf+/T7/6VWB/13vMWvzsEvrW7x03nJz6dkzJ5In5gi4cvHLLf/O
KaLv4XK6yJi6Q1sVnDr1p+h3Kxft7TXL+3SbynVHHeXwP15bFu797fKt7ocH3y6T
b74r/mfZ3tOB+Vo1HNXzYbJb7pFnXZvHJcT6cX7899x1eNQYhMOGNQN7xfVKbNM1
LjGwXq06wl55xQJxUkLP9nGJiXGxeJgVggcajZ0RqissFcFFH5bRMurin9kAZgAb
AcAu2fhv+Xd0aaA74hFu0PN2ckZ9UBiqgmDvVg3SYUvWQU4oFjnj/8ip89FY/K8v
ElfmRgif/KcSJhhbciTdPG+5ENJ0dlgWi7WHmSThJ+LCAd+C0pKQsR7nz0+pIC0/
gt3dPkMwre4tyqC+zHF/5rgPc9yPOR7AHC9EhxBZioOpOlsqgNaagtUkl89ql8tn
aySXz9ZSLp+tuVz+ZP4H+cAE7CX3l90kEYr/oCXKIvIpjfL4rwKCfdzCkTU8iiBh
AGeKc215b/yUL30wMqJv2BJOjiOSUUtISNH9ByZ+n/9yQG2+hCFoKBomW4dozmqc
W8/XoRZfwnA0Ao1ES1ENJCyqiXIWkNpPCpBhSkoB0jOlAJn0q9MaI+y5wXrj+++q
sRwFIvOPNsjBvnJhCkxhu1yQXsOZc4DQPl0sa9u67C+X3Y3edrkgLeUA8vbpYku2
rcv+cqE2FLbLBWmWA+Vhny4WtnUB7Cs3bX2J/tmn68PsS/Bnf5t/mH2Jytqni4Vt
XQD7yk1bXwJZ+9v8w+xLIGt/m39IfamwcSSCEQWBOPK4mf3k9hY3e0cY8WCRjD3Y
PamCUH3TMT1HDJ1Mev35MVBKAO0UfXmGsKfYY1TQlOrOsW3OI4LmvuFZsPlF+P6V
D23Ao8x32FYkfhzH+zLxIZoNeAwrxss4bcDjWDF+Fcf7MfEpzhvweBbiI5iaycBU
s5GCDUYJ4Wg+5NAafkdNGJ2UgqaUg1ACv4kjQk9Qe0SGkgB3jnQBLWynjd4mv8XH
pFmc+HT4Iq+/qZOAOfEJqDkiZ9GnJiAlgkuiEwTbnQZgn5R9XZbF+59RWOi+Rkk6
M2jF3dfdDfgTpyVdJYy3KUEQZzoUQLuvRbeTgWX3BdjoJKbcNHQS8mvoMkInoYb4
ho+JUKwhhvAxE/BEqL7u2Iu+Lj4cRMlUyMoFjfuWMyULgP3n7UWqDMGlbAjEGkKQ
tAaJIYaa50rmd+u179cjqCHsMUeqDGGjR5gZQtoTKOR7xDA+JkKxhhjOx0REc1/y
2MLfv8kc335DZPg1wsYd1S5DkAKkhhhBkk1IW4/IcENkXI9gqwNQoCEC+KG8HsFy
LkFBPI4yTW2SISSEJkUW4jdHZyc9JEbzCyB+cAYw0AOEyKa2nqiX9pJXsKez7yyt
RufkecWHLBxHYslH6P03tX3Ey2c0qNVonDD0MUv3T9WGtJSHHOhGwB5oiMvP+qqu
MYbFLtf1uVzDDeNcftWHujYxBKEyqbAZLNdnPFjbAIoaJyFYDtbgiYkG1xnuIHzN
cZX2WxvtaidxfDhoOqfDHRoW7uUxZMhg/tUgJzyNqYJicaEb+Jg4xHHH+ZbnFzM5
3VxUCdckFz4KpJlORjMWUFtNiku0vBgoEZsUYnAiLYgtEIpi56wA8mxClKcfxQUe
0g/kAqTyFEI2hNLjZGwsPhTEhPQkDiEuEh/TEDFpkJwkhJyok3Q9eH5SlBN3eg41
HaXGJSQMzCC6RBnXpvoH2CWauA7UH8EuEe7aTv93pnSJMFyDvhYu4S/LH2Oh4BJB
cyUuARvS0I1pAK81rnyP0aaDSxSkmenlErTRWUBeWl0CDCCVpxBEkrGBkoWdfPhj
CLGxII0Xo2mZzSWuur7TL3CLMbi4FfQe6BZuuO/q6T3VLTO6RFlcg/4WLtHunek0
c9DHf+snS1wC9mwCd4AQQO8SHungEoVpZnq5BH2zlQXkpdUlwABSeQpBJBkbCFzB
dAwh3CXAFUCMpmU2l5ji9q2uoXuMYavbJl2Ie7hhvtscXQ33zOgS5XAN+li4xMa3
ptPMwc3l+DBqicQl4MIHy590KzN6l4A3NtLqEgVoZnq5hLUum1aXAANI5SkEEf5u
IKwT88cQwl0Cp/FiNC2zucQn7hd0Go8YQwf3ZN0l7BIN3G/qnmVKlyiPa9DPwiU0
1lyijOASz7+XuATd6Y8+FaB3CZd0cIlCNDO9XAJOoQWxBabVJcAAUnkKQYTv+iBH
jyGEuwRO48VoWmZziX/dOf1G7BIBHrH6iR7hBuRRV7/MIzO6RAVcgwEWLtHwjek0
czSZwfHhrHkydwn6B6B3Cbd0cIkgmpleLkF/BMYC8tLqEvbMJeAuQOcS7F2CziUy
513CHS3WBhhgle6gNtxAVunCDWSVLvO4BFmnFFsVagIx0nu4yOI8j8HCSicL2r9S
Y1/KWQ6ifWEVdLJLjAFWQbti28IqKIROWc6+Q/4D+zqhOJdpXr96NNeNcdnutcKj
gu57l5Nekz0+wpeDMGfBvkXtt2+YM/+x8gyG1L6in1u3ILsSTfP8UWme4clkcs1Y
hvN68DzhBVxACaMfgley4SZRCF9f6Jkh/HjFjtfkS/JNrxGu+Brh8snlhwX+f7Tw
kJZUWIvvFa6oCz7qim6hBByW4FLT6HAmKdkSYqN7u+3yCXIf6hvm9pcPcm/l+5nb
S59bbrV8xUbXvlejazNho2/VkEZfiYXlGh3eoIa38lESPTMEYqhZk0694uNS066k
dTKyXZ21a3WHtc+9i2h/0y3V/uYdob2jm6Dd6Y0vfBrBmWPsb9cyGhTjjDU+x+dD
uBZfFA4zIaQXweFvNMTpS9kQp0fgEPRDeAenT2BCSLfWrsOdU9uuBQVnLpgs78zw
XrsGnrcZ6Zkh/NM3iTOnpoEz3nFzL28e4blCH1lt+eCIG8tvc1HLZ0QcX36KS73j
eq5ITm4egXXjUB+JsAYxhPQbOBwshLexnmpMCOnHcThDCKEeUUwI6dYaeLxnahtY
14Q0cFCTwHdyDQw/O9DAWDeJnhnCj3yjQwXPDUagiIyfNfzA1wP9VQrMC+pd+apZ
b+S0ejHRYgnayN6ohkuAYTwe8sBQEv4augQZjC5NcCd1cnr/IY+TMDbOWEgbWRyE
z0Mf438D8V8vRH7lYjn7IYDaAiMKKG9eILSPQCESzk6N3VNC1rZ7AUTsDi6ServD
2ardWdiye0FE7A6/6Eq93eFs1e4sbNkdhuVgd/j1XOrtDmerdmdhy+5BiNgdfrGY
ervD2ardWdiyOzxcBbvDr0ZTb3c4O/3tHsAZjaBhtOYbvm7FYXETioC1j6Eo0NWS
Hgtr6SxAhMrB6qLRaDQ9pYA4hPBMmy7PZhaZrAhrXO2xx4cmo0KFiozHPaMWkdvU
fQSPe+BWBoAJic2bgwoVKsxwH/loxSEsgHqRtTudPXdDVUaVUWUyr4x4b4U7Lb23
WpO2p0RVRpVRmozoRThQvUiVUWVSISN6kRap8zwVKlID0YvgNQfVi1SoeH+IXgQv
/qlepELF+0P0IngLT/UiFSreH/c4IzfM9PLHbNPRYtMXhciK/hL+g+LY4Sx+pUXi
XKQoAS+FsG+xkJdEkri16IAHeVUTyoZdMV37wddoCNj3Mthj2R+kWRNmIScDoVSe
zQNlUCmJrGz5aQHs3wTEQRNbH2ndLGCPsJwMoZIycYdsKiUQh/7B1kdaNwvYIywn
Q6h8OMTBQdj6SOtmAXuE5WQIlf+eOGxACcThymKqT1JQDbZujvfxDNxGjMes4Rxt
cfqLcZolrZsF7BGWkyFUUibuiBanxGF2w9ZHWjcL2CMsJ0OofADEha5OdYDGKUFz
zLq6LFgBa8JyMlSRKCVDPAO7ep0pQXWmxE7lpOnWIK2rLCkp5GQYMiaweewFRU7W
0bDQzyZYZAqQk5Ejw+Y5ijgZy8EPCdixHN04h9XKHjv+Ou8Ar6fEUxrLZUnicEkF
4oocywFxRY7lgDg7lltVPDDrjuX4D1O7kLEcEFfkWA6IK3IsB8SpDtCYkGdT1h3L
bet6YWvXdjM4abo1SOsqS0oKORmGjAlsnqOGNPbCQj+bYJEpQE5Gjgyb5yjiZCwH
P9aiYzlwMLrJIavVZg3sEZaTIeRSNoVDvF4gntJYThb2CMvJECofDnFFjuWAuOLG
cnAvAeLsWO7Ls1Wy7g1u1UqMAaP4sRwQV+RYDogrciwHxKkOXmNSr6zb1XnMmsgh
rMMf2SYujcuSkkJOhqiRLxxCfkhjSTx9AcTthIV+NsEiU4CcjBwZNs+xYzl4G4Id
y9ENqVmtNmtgj7CcDCGXsikc4fWwBAbEUxrLsc1igjVhFnIyhErKxB21LgfEFTmW
A+KKG8vBEhgQN1uXG7ssi6/LnZrGj+WAuCLHckBckWM5IE51gMYLtZxr0rpYBStg
TVhOhioSpWSIZ2BXT7iwteuFjgs5abo1SOsqS0oKORmGjAlsnqOGNPbCQj+bYJEp
QE5Gjgyb5yjiZCwHHw1jx3L9hFxWq80a2CMsJ0PIpWwKR3g9DJuAuCLHckBckWM5
IK7IsRwQN1uXK380647l+HW59rP5sRwQV+RYDogrciwHxKkO0LitXrLF8pQFWAFr
wnIyVJEoJUM8A7s6DOW23l7ASdOtQVpXWVJSyMkwZExg8xw1pLEXFvrZBItMAXIy
cmTYPEcRJ2M5+BAp+77cACGX1coeO/467wCvp8QVOZYD4oocywFxRY7lgLjZutyR
GVl3LMevy/0xhR/LAXFFjuWAuCLHckCc6gCNhYsdz7pjOfjpQ9D+2Zw03RqkdZUl
JYWcDEPGBDbPUUMae2Ghn02wyBQgJyNHhs1zFPHG7iWxquZ92sTnw+HwdQj1a3V/
doMG2SIDRrk19A6uVeivIdl+6vfIuWPjn/zX79MW9M32rMmMPt9MX/r51lVbP5q2
r8HVCc59I4bPr/rs3uxxFbsFn5v9YOvshCv9O7QodD84wm9jXJ8Fs28//PpyyZAu
3fIlr/Yp+L+C+57MvxBeunVEdOtiFXYN2BEwsn7P6Fbrg/d0uD5mVIfhRc/99KLs
k96N8uypUPXjtcFr6u6f2upO/Z1XH/h71t+Su//0n3ZWe5q/5pFcyxqXfePzWOf1
ZPvuJsWnjztRuHnR+IG7W3u8CbxXfxG3o8qpzlv+7JKwZuXCVcHLB3VfcO23cfeH
t5r+Vd3BLcuV7PNXjcl5ztWde6v7hVb18o073OjXskX+XV1wm+/sZaNfXJhX3ev+
N6M/mWNc0fiLlY2T/TeHJO88E1t/BHLNvidkSlS0x7xhl6q36dLth1oVm/14aWKe
/7N3JXBNXHl4RiAhknAFFJVjbOUOQiKHoAgioALhVAQXSyMMGAkZDAFk1RWpN1Wx
LmrBerR1dT0KuiriUWmxYusirSKGS+2qiFRAV9CqWHfeDIEQTvXnYmG+3y/MO/5v
3vDN+96RzJu/aYW7R+q12bm1mjd2Ga+bWCFMMqwO2zdnw+1K2r1rwX/TPvvwy5qW
woNe588+rN232KZlbm5j/qrvJn0+2s3/QqnwttXN0quLvk1Z+dOcw5XhR46Z6A/P
8D9pYD/ik7z61dFT6g+eFiap+ATk3ZUV5NjHnimqf8BaX3Kipkp1LmOhQ77us6Mn
Q/9w+eEc4+ZG71MCA9nTpRuQCXc90R33Vb5HvM8WnNP//YiB7wnG/g9+YG8vd7zB
RKyj0XAf5sXh4fHjolcdysyKsuTiacc3Z+of9QjduPd82qHMa94eobiB81bdqIij
Bx6XP2rmFmiWJv1iOG4GuqO4FrfIQnsrpYKnjWGEj7WOvhvm8+miHw9c/kvx1eI7
LpOveyVmIlmLjHOAxdbeSnW+wAumB10wowCTLb89jBhZMjV91oVUkSZuEd5rqU4X
aLDtUP2ZpMnL/L4pSpxnT2cEj7p3xHmgyGBNP56l8d9TG4ovBeR/dIm3LUNQZ3/6
0sHi0+caL2xKuef56nbNkpBFm6o/y72+zWevpPWy05f/aKpcmXHTN/iMZsRn+r6B
UY8qG5IjH11B5kz+YnbFvgpOxW8v5mU1ZO6OiDXIcHRKrLx//5b6/RZZSEBAen2k
hm3kP8WWuc70GuvZGyPZGkuaZsz7e4NZTc5LidulNW4LgvzQk/wnIyLqple8iNDK
blrDu/bMx60oK6w4WBBTcOTz76P//fvvj6ZFLtnNv/KiJC7H0MgoYGmOobHxxitm
Lo6inIthfgJeTOvObK+cwEu13/K/9mXfNDM3N//q2LqNrCqzv2agGHtptsHWkmU5
x+YeXoexX5ZP8cypk+XFfxDFXfXj9hUB7KKjBdiWkpISPLOmYmylZ/HqePaoDEu/
C8y2gnd+xbZwl2a3njvH93/lvEez9gA/86PGq3GviiYsXBb09ZrmTOMrY2zONu3b
uVNTM+dGmJvDuMVBfzzkLH5anbE05dpBrdb0Su1F2fXLy75QOzXyOrrVH831+2b3
C8/Nm6vWLjia71SbbzXLQN97VZAAPziu2G9nNTlTzcqvwWber2Wly+E52ONXc1Fx
tK67A+GzAbwuALwwwE+QiiVJES6+GuaQc5MueFe9958NgAdFjhyJuaUqSIeOE/7M
lAl0IhyCMdpmPmQa6aOXDJNuSMgw+DZCHiYn611twA2ThzUUwsDVhzxskAZioEb5
+yFIL2zg/ADyt0lAUOZU0m+pPKdrPumljQDwoNcG0t2KBqQD68CtNFs1BxiFZbQq
VT7Mhwtpj0HV7l3drSgCnF/5A7krGLwzKM9G+uNkknTJYsQ0VCf906lCHDLvRgc9
CngTPyvtJHQDuX8bQHiLeittL9MBnsmQ0YKYfJjLKKQJwf0ehISbqf+sShJOHzjC
ZdqtNEjPAeboyGiH2HxYT6eQdp4NDUrCR+s2trVw9YEiHKbrwA+YQropHYUvMvXp
rnQ+nMe0AX3mICRcRS1WjSR8+MAR3qIexCzTNqXPZNgw07Rd6VyGPnM7uIhBSPh0
1fU0knC1gSNcpv2AKdMzpXN0LjJX6rnS9XTymDvAdQ9Cwms0cukD3KU8ZOrAVboa
dD0WCufr5tM4LD68S7cUTN0GIeFh7V0KY+AIb1Gv0p2jpceaycjXVdHisLiMXbpj
wARyEBL+XFVOuMbAES7T1tBez9ZjcXTuaTmyOSw9nVItf3yWAr8B4bC7osW7wpsT
HkILbSOc+f8m3MB9OVECWHR4PiTsO3s7pECBAgUKFBTRl7dDZXsKFCj0jO69HSpb
UaBAYeige2+HylYUKFDoGd17O1S2okCBQs/o3tuhshUFChR6RvfeDpWtKFCg0DO6
93aobEWBAoWe0b23Q2UrChQo9Azg7bDDx2GIehNE7uO6iR9zNYh9XJm/DE+301tt
Pkt7nnSkZ8sw1/SUrRX84Fsqa2sP3c3mTf/Y9upX5eEFdR7NLhM/OZJY/ay15TGm
08T2MP7Qo/rTUPZ+rbhSjXye1eUTRrHmmw0Td/qONFsmG+HX/LGb4Nmscdmjp5mI
qpct3TNd3yXYO2uUSWEWyzbFJ9nEo6GsNKnuyvOV4/3qrLYxslYcmLiqLuXq9sO3
+U/KCo1vn/EOsZj0XapKmKdPkOXoipsmOx3y0KQNjxtlTU8bt+92+GmPiB5i1rzu
CXP9k5+NK6ctWZCr5rlkgVbDy3+dfW7/UmOS2dp1YCeGg/tE4hkS8KiWC/53Ghaf
IBSh0YivIEEkECN8VIhKkKgkSTKKYDFIslAqFAljMSQaTUZFWEI8KpYiQjHi4Uht
3egTgAdFjqzTdIlUGO/IzTqSIQ4Rc7bl2dlynTkIl2trTwR4tniQZ4egixNQiRBQ
n8iygRAIDATyRkz+DAUexmdAt8aDZ3rv4Fnj255NUoHi8L/x+PnBlpAtxNNHJC56
tAe7hQGRb+0e3/4CYTDwEM8gqTFmT3C9DseDX8EIiInavNqvEvEUSFEII65qaoLE
hudsw7PjcSGyBDiHGNLsXGKmJ25PUEUagSYqJk7gj0nR+RgW18UEfEEoJh4uC5Rg
C9Eoaeds8BFDrE7VoJLONmBdJyZ2rOCnkGJRmKhzPpixismEtvSEduLXQ+Mg8p/Z
kA65pdU+n3I+qHlKW2YndPQ4E9vEB+N1WkEK4muXWWIUJkETSYVFioRiFImVCBIW
UGLrE72JzbQjGZcAiPVLbAOvNWibutRhaGtNB1LUmikNdvuw6tmU/fs39VNrw/A6
nSEFrYmx8YhUIhAnxqASCR6fJUngWSP4ZSNJfsh8EYZFIxZ4I5CORxw4iKMlJb0+
0Zv0xnYk44oAMUJxPDsFzb1/Q1y5+SbHoS07QEnXIa5oUmY/ZaeC1+mFH6cmoxJB
LKo0wiHzUzt02KZAiygsfj4+4kWDxiAlxYfECMUCUTcSlEuPkiAJQENPEgSeneTg
EDGWhygJdUW8yF4OsWgbBC1ZgUmSBBGKyLMcEYs2iVraEJt2YaJJgiNolAzI3aQn
OYJW9XpyJNGdHCH3kaOz7Mr7KUe+INWGNwHI0W7wyHEkpCjHatYwt+OXnr7GKKiK
1+mEH19vlRfItUfihVFoNwKUgxIgid7GQLBpXg4OEcM1xbUjRr73YbQzKSt1Gtqj
Hejb3maSqYbXOQo/hiqt4ygB9Rt/YgFBoQ/CXIa2gMZAbycgGl6nEaS0SutYmcXg
g1YcJaI+0ZuI3DqS8VYPYjME+PifKE1EMDESLUhFuFxEII5GuDxEECMF8wNUJGpf
KrNAg7Wzt3MiAzzuxIEXXhpzqsGkoS08Q+jthEfH6wSlA70QKYrf63j8vvO9ZyIW
hPgsFb8pofTXJ3rTn+I2aA4RkyvqPRBSY91/hriQ8JXsG37hoZLmrpj1hoDd/wcA
AP//AwCqwwnH</Template></GraphPadPrismFile>
