# Supplementary figures and images for: CD8+ T cell self-tolerance permits responsiveness but limits tissue damage
Source: eLife journal article supplement (doi:10.7554/elife.65615), 2021-04-30

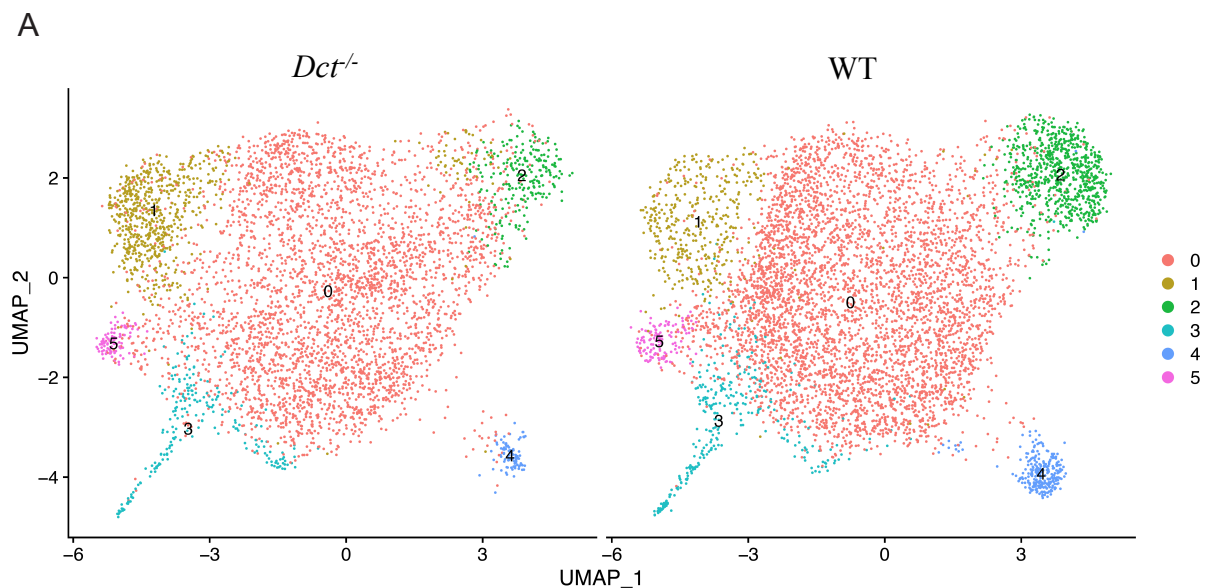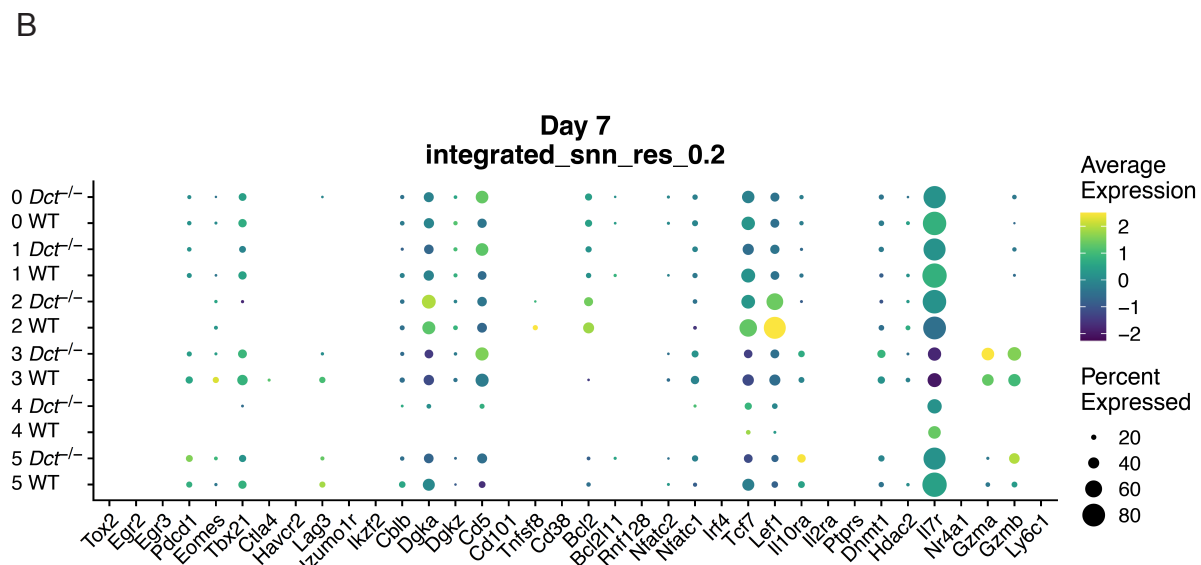

Supplement: supp [file elife_poa_e65615_Figure_5_figure_supplement_1.pdf › elife_poa_e65615_Figure_5_figure_supplement_1.pdf]

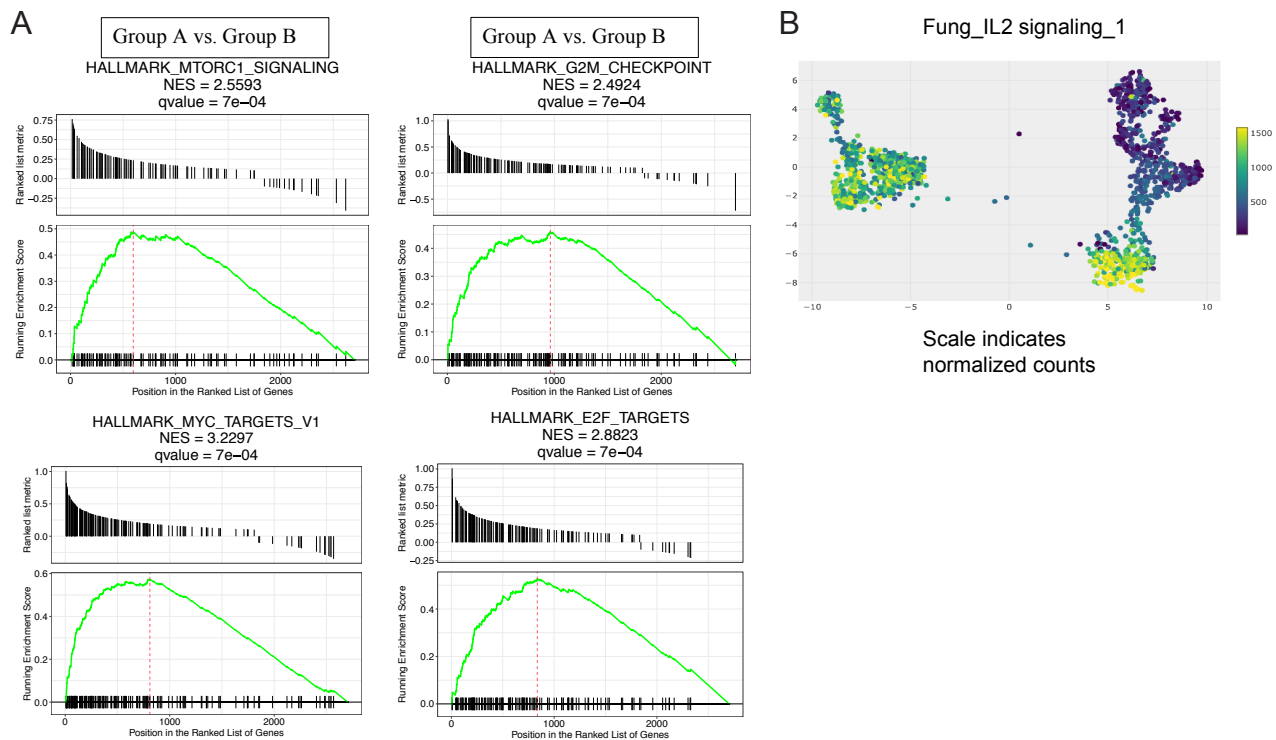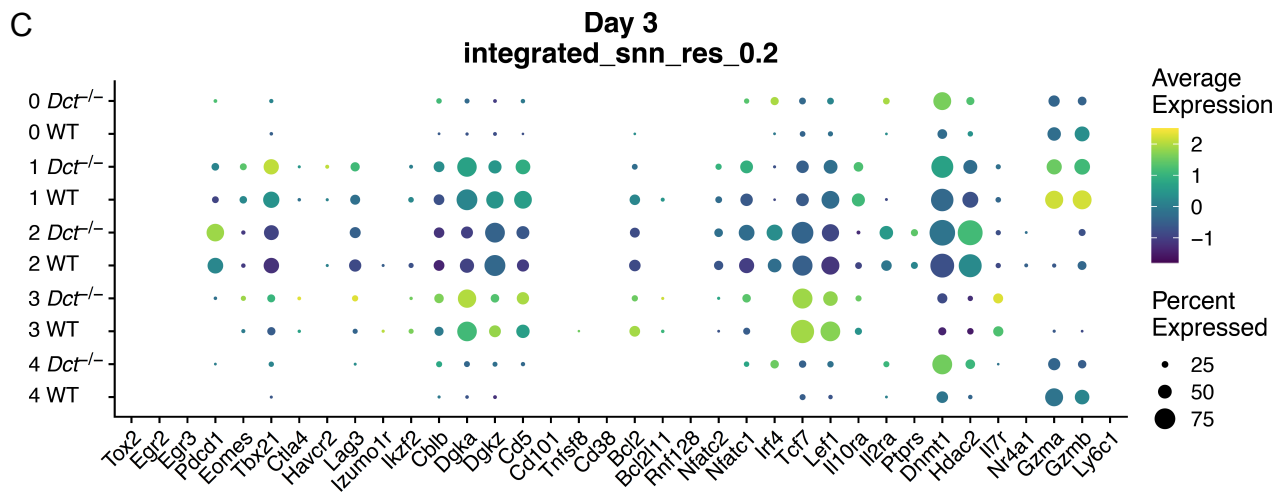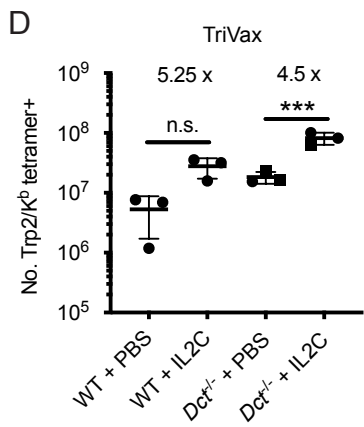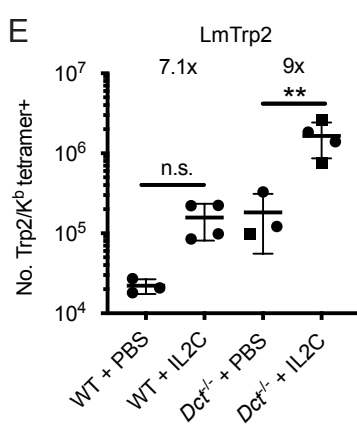

Supplement: supp [file elife_poa_e65615_Figure_5_figure_supplement_2.pdf › elife_poa_e65615_Figure_5_figure_supplement_2.pdf]
